# Supplementary material for: High Risk Clone: A Proposal of Criteria Adapted to the One Health Context with Application to Enterotoxigenic Escherichia coli in the Pig Population
Source: MDPI journal article supplement (doi:10.3390/antibiotics10030244), 2021-02-28
Supplement: s1 [file s1]

| Branch number, with a bootstrap value of 1 and containing 3 isolates or more.<br>See figure below | Maximum nb of years between to isolates sampling date | Nombre de SNP max                                                                                                                                                                                                              | Name of the associated clone |
|---------------------------------------------------------------------------------------------------|-------------------------------------------------------|--------------------------------------------------------------------------------------------------------------------------------------------------------------------------------------------------------------------------------|------------------------------|
| <b>1</b>                                                                                          | <b>5</b>                                              | <i>Except three outsiders that have been colored in black, and 16 isolates that presents 65 SNPs of difference with one isolate.<br/>55 for 134 isolates (the distance matrix is available in supplemental data Table S10)</i> | <b>A-I</b>                   |
| <b>2</b>                                                                                          | <b>2</b>                                              | <b>0</b>                                                                                                                                                                                                                       | <b>A-I-sub</b>               |
| 3                                                                                                 | 4                                                     | 62                                                                                                                                                                                                                             |                              |
| 4                                                                                                 | 2                                                     | 68                                                                                                                                                                                                                             |                              |
| 5                                                                                                 | 2                                                     | 188                                                                                                                                                                                                                            |                              |
| <b>6</b>                                                                                          | <b>5</b>                                              | <b>41</b>                                                                                                                                                                                                                      | <b>A-II</b>                  |
| 7                                                                                                 | 3                                                     | 132                                                                                                                                                                                                                            |                              |
| 8                                                                                                 | 4                                                     | 129                                                                                                                                                                                                                            |                              |
| 9                                                                                                 | 5                                                     | >200                                                                                                                                                                                                                           |                              |

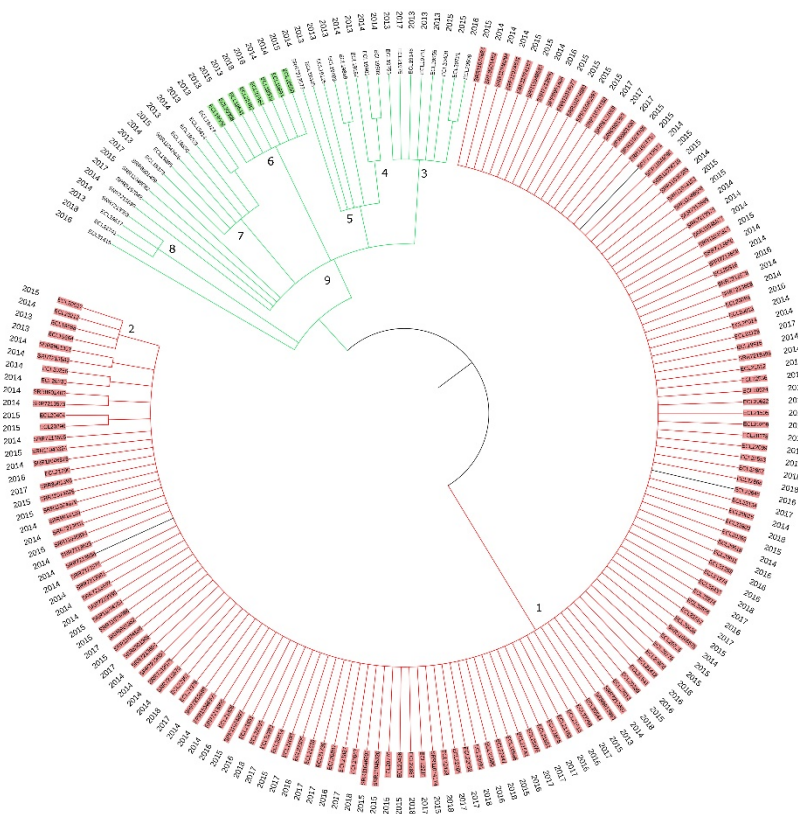

Figure S2 : Number of maximum SNPs in relation to the number of years between two isolates within each branch tree with a bootstrap value of one and composed of 3 isolates and more. The bolded branches in the table are considered as clones. In this phylogenetic analysis the number of SNP per year should not exceed 11 ( $MxP = 3 \times 10^{-6} \times 3\,675\,678$ ).
