# Supplementary material for: High Risk Clone: A Proposal of Criteria Adapted to the One Health Context with Application to Enterotoxigenic Escherichia coli in the Pig Population
Source: MDPI journal article supplement (doi:10.3390/antibiotics10030244), 2021-02-28
Supplement: s1 [file s1]

| Clonal lineage | Disease severity score |    | Total |
|----------------|------------------------|----|-------|
|                | 0                      | 1  |       |
| <b>A</b>       | 38                     | 45 | 83    |
| <b>B</b>       | 4                      | 2  | 6     |
| <b>C</b>       | 8                      | 0  | 8     |
| <b>D, E, F</b> | 6                      | 3  | 9     |
| <b>Total</b>   | 56                     | 50 | 106   |

Table S9 : Number of isolates associated with a disease severity score per clonal lineage. The clonal lineage D, E and F were gathered because the number of isolates for which necropsy reports were available was low.

| Clones within clonal lineage A                                     | Disease severity score |    | Total |
|--------------------------------------------------------------------|------------------------|----|-------|
|                                                                    | 0                      | 1  |       |
| <b>A1-subclone</b>                                                 | 2                      | 3  | 5     |
| <b>A1</b>                                                          | 30                     | 19 | 49    |
| <b>A2</b>                                                          | 3                      | 0  | 3     |
| <b>A3</b>                                                          | 2                      | 6  | 8     |
| <b>A4</b>                                                          | 6                      | 2  | 5     |
| <b>Isolates belonging to no clones within the clonal lineage A</b> | 8                      | 2  | 10    |
| <b>Total</b>                                                       | 43                     | 30 | 73    |

Table S10 : Number of isolates associated with a disease severity score per clone within the clonal lineage A.
