# Supplementary material for: High Risk Clone: A Proposal of Criteria Adapted to the One Health Context with Application to Enterotoxigenic Escherichia coli in the Pig Population
Source: MDPI journal article supplement (doi:10.3390/antibiotics10030244), 2021-02-28
Supplement: s1 [file s1]

| Clonal lineage | Stage of production |              |                   |         | Total |
|----------------|---------------------|--------------|-------------------|---------|-------|
|                | Lactation           | Post-Weaning | Growing-Finishing | Unknown |       |
| <b>A</b>       | 20                  | 90           | 10                | 11      | 131   |
| <b>B</b>       | 0                   | 6            | 1                 | 0       | 7     |
| <b>C</b>       | 1                   | 10           | 0                 | 0       | 11    |
| <b>D, E, F</b> | 7                   | 14           | 1                 | 2       | 24    |
| <b>Total</b>   | 22                  | 116          | 11                | 9       | 173   |

Table S11 : Number of isolates associated with each stage of production. The clonal lineage D, E and F were gathered because the number of isolates for each clonal lineage was low.

| Clones within clonal lineage A                                     | Stage of production |              |                   |         | Total |
|--------------------------------------------------------------------|---------------------|--------------|-------------------|---------|-------|
|                                                                    | Lactation           | Post-Weaning | Growing-Finishing | Unknown |       |
| <b>A1-subclone</b>                                                 | 0                   | 7            | 0                 | 0       | 7     |
| <b>A1</b>                                                          | 13                  | 53           | 1                 | 5       | 72    |
| <b>A2</b>                                                          | 1                   | 5            | 4                 | 1       | 11    |
| <b>A3</b>                                                          | 3                   | 8            | 2                 | 1       | 14    |
| <b>A4</b>                                                          | 1                   | 7            | 0                 | 0       | 8     |
| <b>Isolates not belonging to any clone within clonal lineage A</b> | 2                   | 10           | 3                 | 1       | 16    |
| <b>Total</b>                                                       | 20                  | 90           | 10                | 8       | 128   |

Table S12 : Number of isolates associated with each stage of production score per clone within the clonal lineage A.
