# Supplementary material for: High Risk Clone: A Proposal of Criteria Adapted to the One Health Context with Application to Enterotoxigenic Escherichia coli in the Pig Population
Source: Antibiotics (Basel). 2021 Feb 28;10(3):244. doi: 10.3390/antibiotics10030244 (PMC8000703; doi:10.3390/antibiotics10030244)
Supplement: Supplementary file 1 [file antibiotics-10-00244-s001.zip]

Archive with 16 entries (16 files):
- FigureS1_SNPmax_vs_year.pdf
- FigureS2.Phenotypic_resistance.jpg
- FigureS3.jpg
- FigureS4_SNPmax_vs_year_USA_QC.pdf
- TableS11_S12_stageofproduction.pdf
- TableS13_disctancematrix_192isolates.xlsx
- TableS14_metadata.xlsx
- TableS1_sequencing_assemblyquality.xlsx
- TableS2_Group of genes.pdf
- TableS3_virulencefinderresults.xlsx
- TableS4_VFDBresults.xlsx
- TableS5_Resistancefinderresults.xlsx
- TableS6_Argannotresults.xlsx
- TableS7_Plasmidfinderresults.xlsx
- TableS8_BLSE_AmpCgenesresults.xlsx
- TableS9_S10_diseaseseverityscore.pdf
