# Supplementary material for: High Risk Clone: A Proposal of Criteria Adapted to the One Health Context with Application to Enterotoxigenic Escherichia coli in the Pig Population
Source: Antibiotics (Basel). 2021 Feb 28;10(3):244. doi: 10.3390/antibiotics10030244 (PMC8000703; doi:10.3390/antibiotics10030244)
Supplement: Supplementary file 1 [file antibiotics-10-00244-s001.zip › FigureS1_SNPmax_vs_year.pdf]

| Branch number, with a bootstrap value of 1 and containing 3 isolates or more.<br>See figure below | Maximum nb of years between to isolates sampling date | Nombre de SNP max | Name of the associated clone |
|---------------------------------------------------------------------------------------------------|-------------------------------------------------------|-------------------|------------------------------|
| 1                                                                                                 | 7                                                     | 504               |                              |
| 2                                                                                                 | 23                                                    | 796               |                              |
| 3                                                                                                 | 10                                                    | 150               |                              |
| 4                                                                                                 | 4                                                     | 60                |                              |
| <b>5</b>                                                                                          | <b>2</b>                                              | <b>13</b>         | <b>C1</b>                    |
| <b>6</b>                                                                                          | <b>9</b>                                              | <b>34</b>         | <b>B1</b>                    |
| 7                                                                                                 | 23                                                    | 401               |                              |
| <b>8</b>                                                                                          | <b>5</b>                                              | <b>48</b>         | <b>A1</b>                    |
| <b>9</b>                                                                                          | <b>3</b>                                              | <b>10</b>         | <b>A1-sub</b>                |
| 10                                                                                                | 5                                                     | 168               |                              |
| <b>11</b>                                                                                         | <b>5</b>                                              | <b>26</b>         | <b>A4</b>                    |
| <b>12</b>                                                                                         | <b>18</b>                                             | <b>93</b>         | <b>A3</b>                    |
| 13                                                                                                | 3                                                     | 31                |                              |
| <b>14</b>                                                                                         | <b>23</b>                                             | <b>112</b>        | <b>A2</b>                    |
| 15                                                                                                | 3                                                     | 37                |                              |

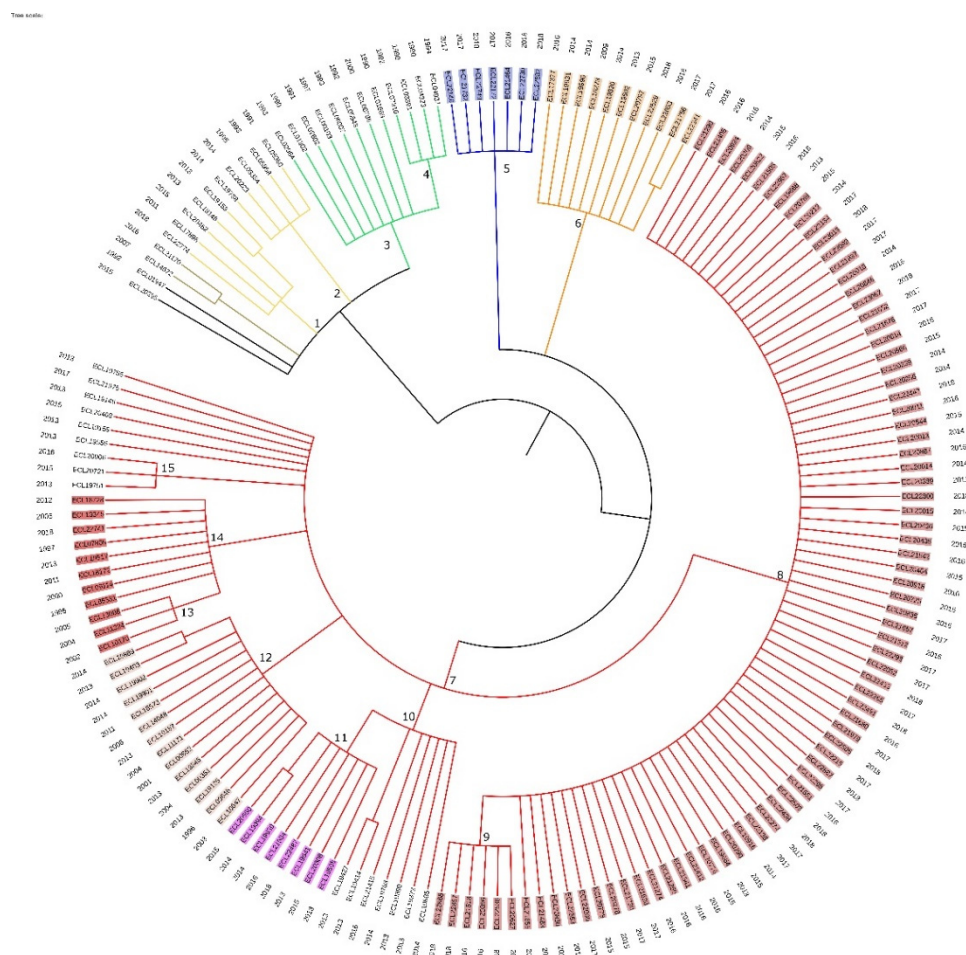

Figure S1 : Number of maximum SNPs in relation to the number of years between two isolates within each branch tree with a bootstrap value of one and composed of 3 isolates and more. The bolded branches in the table are considered as clones. In this phylogenetic analysis the number of SNP per year should not exceed 10 ( $MxP = 3 \times 10^{-6} \times 3\,366\,150$ ).
