# Supplementary material for: High Risk Clone: A Proposal of Criteria Adapted to the One Health Context with Application to Enterotoxigenic Escherichia coli in the Pig Population
Source: Antibiotics (Basel). 2021 Feb 28;10(3):244. doi: 10.3390/antibiotics10030244 (PMC8000703; doi:10.3390/antibiotics10030244)
Supplement: Supplementary file 1 [file antibiotics-10-00244-s001.zip › TableS1_sequencing_assemblyquality.xlsx]

## Sheet: quast and multiqc
ID_isolate	contig>=0	contig>=1000	Total length >=0bp	Total length >=1000bp	nb of contigs	Largest contig	Total length	GC	N50	N75	L50	L75	% Dups	% GC	Length (bp)	mean_length	Total length	Nb_read	depth
ECL00103	332	160	5200713	5135475	209	332740	5171117	50.58	106377	43724	16	36	18.5%	0.51	245	244	5171117	1592090	75.123
ECL00351	297	133	5423092	5352389	196	400694	5397267	50.68	148666	71715	11	24	14.5%	0.51	239	240	5397267	1156514	51.4266
ECL00652	316	145	5554271	5481226	209	467040	5526827	50.62	145625	64450	12	26	15.1%	0.51	231	232	5526827	1269440	53.2874
ECL01302	241	146	5218367	5182884	169	311002	5200394	50.69	106376	54369	16	31	19.2%	0.51	162	162	5200394	2188310	68.1691
ECL01669	229	122	5068376	5028982	146	339847	5047708	50.74	162326	72448	11	22	18.3%	0.51	198	198.5	5047708	1569756	61.7303
ECL01947	279	148	5010297	4964703	176	312639	4984235	50.76	122145	56351	13	27	11.1%	0.51	232	233	4984235	820740	38.3675
ECL02602	217	116	4850259	4813498	136	293846	4829445	50.77	126487	45791	12	28	25.8%	0.51	176	176.5	4829445	2741170	100.181
ECL02964	219	138	5092273	5059855	161	232485	5076913	50.67	92049	47413	19	36	16.2%	0.5	220	220.5	5076913	1255984	54.5498
ECL03391	225	131	5150743	5116186	152	309859	5131856	50.75	113796	61593	16	31	26.6%	0.51	167	167.5	5131856	3388106	110.585
ECL04323	230	145	5048288	5016416	164	309859	5030934	50.64	107725	45972	15	32	17.2%	0.51	173	173.5	5030934	1584544	54.6456
ECL04937	258	129	5131509	5084613	158	374716	5105576	50.63	114500	59845	13	28	20.5%	0.5	217	219	5105576	1765986	75.7507
ECL05380	262	155	5142861	5107390	176	315565	5123065	50.67	108000	48388	17	33	14.7%	0.5	224	225.5	5123065	1189554	52.3601
ECL05543	242	140	5059649	5023481	160	208897	5038258	50.77	115303	59783	17	33	16.5%	0.51	188	188.5	5038258	1402534	52.474
ECL05958	229	125	5213984	5175332	152	314243	5195599	50.51	101685	59577	16	32	22.4%	0.5	235	237	5195599	2326654	106.132
ECL06007	362	261	5136563	5094620	291	172488	5117786	50.72	62541	25753	25	57	10.4%	0.51	197	197.5	5117786	723920	27.9367
ECL07310	186	107	4898285	4869244	127	374716	4883295	50.72	134230	63853	12	26	29.2%	0.51	179	179.5	4883295	3284502	120.732
ECL07805	570	167	5514989	5381253	250	279377	5438020	50.60	114050	46850	16	33	10.6%	0.5	220	221	5438020	1324800	53.8396
ECL08334	192	124	5118756	5095461	139	473096	5106151	50.60	129315	74504	13	25	21.6%	0.51	186	186	5106151	2291364	83.4667
ECL08786	249	135	5065571	5025429	156	288053	5041560	50.60	119449	54226	13	27	17.0%	0.51	194	194.5	5041560	1367988	52.7761
ECL09114	248	152	5381628	5343520	181	371669	5365353	50.73	127036	63580	13	28	4.9%	0.51	209	209.5	5365353	1691072	66.031
ECL09646	446	165	5543693	5444127	234	406415	5491873	50.59	145624	53368	13	30	17.3%	0.5	224	225.5	5491873	1563876	64.2138
ECL10170	355	165	5425020	5349461	226	341658	5391995	50.70	136145	55803	14	30	17.3%	0.51	175	175	5391995	1824160	59.2041
ECL10647	352	171	5699304	5624086	236	388630	5669354	50.51	135409	51126	14	30	12.5%	0.5	268	268.5	5669354	723614	34.2703
ECL11171	409	269	5521943	5462229	320	171308	5498819	50.71	51274	25360	33	72	13.8%	0.51	186	186	5498819	1218462	41.215
ECL11324	374	184	5576412	5495955	248	374182	5541783	50.60	127037	47835	15	33	15.1%	0.51	231	232.5	5541783	1413366	59.2964
ECL13086	372	173	5672715	5589046	239	403085	5638119	50.76	136145	60897	14	28	11.6%	0.51	265	265.5	5638119	890212	41.9202
ECL13345	385	199	5434959	5356321	266	235392	5404488	50.70	104519	40573	18	39	16.0%	0.51	174	174	5404488	1674310	53.9052
ECL14048	426	181	5570804	5487813	226	361732	5520165	50.48	127037	56736	14	31	12.4%	0.52	165	165.5	5520165	1094824	32.8239
ECL14672	366	178	5136275	5054324	240	238362	5101411	50.62	86364	36759	19	41	24.4%	0.5	195	195.5	5101411	2922486	111.998
ECL16273	336	146	5460758	5384805	210	364820	5427417	50.66	127323	68957	13	27	23.2%	0.51	216	216.5	5427417	2519466	100.502
ECL17377	275	131	5451991	5389882	185	371580	5427845	50.66	150507	70001	12	24	14.3%	0.51	268	268.5	5427845	1078776	53.364
ECL17896	213	147	5328435	5302310	165	310293	5316536	50.41	99090	42046	16	37	15.8%	0.5	231	231.5	5316536	1184396	51.5726
ECL18172	305	152	5454863	5388789	209	345008	5430278	50.58	136994	68958	13	27	27.1%	0.51	210	210.5	5430278	3159796	122.487
ECL18573	394	242	5595884	5536506	292	259384	5571324	50.61	80557	27198	23	53	10.5%	0.51	219	219.5	5571324	820100	32.3104
ECL18728	291	184	5417786	5373733	217	372557	5398881	50.74	88244	41167	17	39	15.6%	0.51	224	224.5	5398881	1326178	55.146
ECL19125	278	121	5580690	5520163	172	371386	5555209	50.47	155075	68957	13	26	25.5%	0.5	186	186.5	5555209	3393264	113.919
ECL19146	325	130	5361379	5286451	192	386319	5329374	50.66	126790	51125	11	27	21.7%	0.5	174	174.5	5329374	2787642	91.2759
ECL19148	286	137	5270283	5212649	183	291132	5246146	50.46	111630	44854	16	34	19.1%	0.51	240	240.5	5246146	1695720	77.7372
ECL19153	265	169	5250126	5211002	201	291133	5234504	50.53	86669	34515	19	43	14.1%	0.51	235	235.5	5234504	1009370	45.4115
ECL19159	393	167	5729459	5643844	233	369948	5689420	50.67	124455	50963	13	31	20.4%	0.5	194	194	5689420	1767266	60.2609
ECL19187	356	153	5592455	5512240	217	400463	5556288	50.55	134884	63483	13	28	13.1%	0.51	202	202.5	5556288	1193910	43.5123
ECL19345	321	146	5399800	5326675	208	367888	5370801	50.64	116259	55235	15	31	26.5%	0.51	183	184.5	5370801	3160844	108.583
ECL19373	300	139	5459678	5399136	187	338743	5431417	50.61	125560	51126	14	30	23.3%	0.51	195	195.5	5431417	2660308	95.7559
ECL19390	342	168	5422268	5353965	224	373279	5391327	50.65	114653	46793	17	37	11.1%	0.5	193	193.5	5391327	881438	31.6357
ECL19403	243	129	5524380	5480357	163	360191	5504194	50.62	126101	64450	14	29	16.5%	0.5	214	216	5504194	1472180	57.7725
ECL19414	335	172	5504054	5436277	225	397374	5474235	50.67	121146	50172	14	30	19.7%	0.51	227	228.5	5474235	1286204	53.6874
ECL19427	310	157	5468236	5406077	206	370242	5441007	50.69	115853	49044	14	31	19.8%	0.51	182	183	5441007	1773968	59.6647
ECL19508	334	156	5491133	5425866	206	359071	5459745	50.55	102240	42095	15	34	27.3%	0.51	229	229.5	5459745	2995410	125.912
ECL19517	258	116	5227166	5179018	145	348079	5198981	50.68	130187	67326	14	27	24.8%	0.5	210	211.5	5198981	2692220	109.522
ECL19555	372	152	5586469	5501915	219	391729	5548317	50.63	124455	51126	12	29	30.0%	0.5	198	198.5	5548317	3015412	107.881
ECL19602	382	148	5502756	5410535	220	379936	5459322	50.62	127323	65018	13	27	23.2%	0.51	187	187.5	5459322	2818258	96.7929
ECL19641	374	169	5378645	5302598	223	334186	5340018	50.57	102334	40510	16	35	14.8%	0.5	192	192.5	5340018	1315982	47.4393
ECL19664	364	158	5433365	5347529	224	432340	5394218	50.65	127779	68957	13	26	18.6%	0.5	225	225.5	5394218	1461218	61.0848
ECL19668	352	156	5432430	5350881	220	466923	5396348	50.65	127779	71715	13	25	25.1%	0.51	216	216.5	5396348	2676914	107.397
ECL19751	346	144	5613350	5536346	206	391729	5578429	50.58	127036	63579	12	28	19.5%	0.5	224	224.5	5578429	1402826	56.4558
ECL19755	472	183	5654143	5531191	282	417065	5602904	50.46	116452	49054	14	31	27.0%	0.5	206	206.5	5602904	2432000	89.6335
ECL19763	345	176	5522894	5456848	229	404604	5492430	50.64	117800	43839	15	32	14.1%	0.51	231	231.5	5492430	959514	40.4425
ECL19788	265	135	5122843	5076752	166	340103	5098233	50.71	106682	44078	16	34	23.9%	0.5	211	211.5	5098233	2316118	96.0841
ECL19820	285	150	5385742	5334307	188	213618	5360393	50.69	126149	51942	16	32	16.0%	0.51	197	197	5360393	1363660	50.1159
ECL19885	294	138	5565742	5504511	185	446037	5537332	50.62	121147	48324	15	31	15.2%	0.51	259	259.5	5537332	1278228	59.9025
ECL19889	432	198	5677612	5580624	277	342093	5635807	50.62	87375	43929	17	40	15.3%	0.51	204	204.5	5635807	1407540	51.0738
ECL19894	354	176	5431654	5364655	226	288713	5399446	50.57	102334	40564	18	38	12.7%	0.51	223	224	5399446	937234	38.8818
ECL19901	305	135	5237191	5166794	193	414409	5207835	50.67	133799	68956	11	24	19.8%	0.51	201	202.5	5207835	2039090	79.2874
ECL19902	369	156	5503954	5416799	227	400463	5467289	50.65	145625	63531	12	26	23.4%	0.5	206	207.5	5467289	2597956	98.6002
ECL19916	290	152	5384448	5324274	204	346553	5360849	50.66	127779	67369	13	27	10.1%	0.5	253	254	5360849	665810	31.5464
ECL19931	302	140	5324819	5262116	188	360673	5295359	50.67	127323	64142	13	27	20.0%	0.5	191	193	5295359	2086438	76.0444
ECL19939	387	205	5327923	5257704	261	235240	5296768	50.62	78614	32281	21	46	14.5%	0.51	215	216	5296768	1176992	47.9972
ECL19990	424	170	5418080	5327587	232	357959	5370612	50.62	114144	47232	15	32	20.7%	0.51	201	201.5	5370612	2127184	79.8098
ECL20013	290	146	5289178	5229993	192	393719	5261716	50.68	124142	67369	14	27	19.0%	0.51	223	224	5261716	1798858	76.5804
ECL20014	288	143	5303085	5244727	186	390430	5274940	50.68	127089	68957	13	27	18.4%	0.5	182	183	5274940	2109282	73.1759
ECL20015	378	203	5408134	5335146	260	306961	5375784	50.68	91013	43929	18	40	12.7%	0.51	225	226	5375784	1030602	43.3269
ECL20018	354	152	5428948	5344792	218	432743	5391424	50.65	150507	63529	12	24	9.4%	0.51	257	257.5	5391424	603332	28.8158
ECL20209	372	170	5544183	5460402	234	466697	5505676	50.60	127779	63532	13	27	19.9%	0.5	226	226.5	5505676	1760448	72.4237
ECL20212	360	161	5428325	5345753	224	466697	5390776	50.65	127779	71715	13	25	24.5%	0.5	216	216	5390776	2492884	99.886
ECL20223	235	150	5312923	5280543	172	349095	5296527	50.61	97347	43108	18	37	13.8%	0.51	226	227	5296527	962094	41.2337
ECL20239	279	144	5453293	5400823	182	339152	5428003	50.68	127779	68957	14	27	20.6%	0.51	188	188	5428003	1763698	61.086
ECL20256	289	165	5443855	5396149	198	390366	5419870	50.70	112261	54270	15	32	18.1%	0.51	179	179.5	5419870	1544310	51.1458
ECL20278	404	196	5436652	5349633	264	334609	5397552	50.65	106987	55803	16	33	30.9%	0.5	213	213.5	5397552	1016784	40.2189
ECL20290	503	172	5470793	5351688	243	279389	5400927	50.60	123709	46877	15	32	20.4%	0.51	230	230.5	5400927	1972638	84.188
ECL20308	352	161	5406785	5341889	205	355837	5371861	50.58	94534	43061	18	37	22.2%	0.51	208	209	5371861	2022840	78.7015
ECL20389	274	152	5356513	5303892	194	346525	5333120	50.70	125253	63532	14	27	19.0%	0.5	208	209.5	5333120	1788048	70.2396
ECL20395	291	179	5182623	5136526	213	339054	5161050	50.56	74884	37416	21	45	20.4%	0.5	177	177	5161050	1416114	48.5661
ECL20404	370	178	5390440	5311653	242	432655	5355672	50.66	122492	55102	16	31	23.5%	0.5	163	163	5355672	2052534	62.4689
ECL20408	388	158	5589268	5501446	227	391729	5549245	50.62	109083	57333	13	29	32.5%	0.49	207	207	5549245	1809912	67.514
ECL20435	326	186	5586521	5529102	229	295719	5559071	50.83	104395	51041	17	36	17.0%	0.51	225	226	5559071	1345292	54.6919
ECL20436	366	191	5708596	5634712	246	466697	5674250	50.73	127779	55808	14	30	16.1%	0.5	202	202.5	5674250	1463868	52.2418
ECL20462	254	126	5075850	5028485	161	302921	5053983	50.59	112191	55224	15	31	22.4%	0.5	185	185.5	5053983	2284378	83.8452
ECL20544	380	223	5314091	5248397	274	202151	5285751	50.73	74752	30749	24	49	9.4%	0.51	231	231.5	5285751	595824	26.0953
ECL20550	336	167	5450206	5388589	211	340810	5418388	50.58	102334	40711	16	35	17.6%	0.51	197	199	5418388	1784928	65.5547
ECL20566	319	159	5424080	5364611	205	466696	5396024	50.69	126908	68957	14	27	21.1%	0.5	213	215.5	5396024	1941934	77.5547
ECL20622	299	173	5447193	5395261	214	434681	5423609	50.63	127087	67362	13	27	15.5%	0.51	236	237	5423609	1164380	50.8809
ECL20627	368	167	5426441	5342231	232	466697	5388754	50.65	127779	67369	13	26	22.0%	0.5	223	223.5	5388754	2061824	85.5147
ECL20721	319	143	5317097	5255636	187	608730	5286407	50.68	124455	55220	13	29	18.5%	0.51	229	231	5286407	1524780	66.6283
ECL20725	401	237	5481408	5411715	295	271273	5452354	50.77	75332	34655	22	48	12.1%	0.51	230	231	5452354	843060	35.7179
ECL20769	358	178	5449697	5376499	233	311489	5415483	50.65	125673	51042	15	31	16.7%	0.5	208	208	5415483	1288180	49.4769
ECL20776	427	231	5546327	5472874	283	249664	5508448	50.83	84411	35354	20	46	23.3%	0.51	177	177	5508448	1274876	40.9649
ECL20778	430	290	5391867	5334708	333	134900	5365170	50.89	61751	27252	33	68	12.4%	0.51	234	234.5	5365170	808908	35.3556
ECL20797	261	171	5475180	5436608	207	209090	5461209	50.63	103619	47758	19	38	13.2%	0.51	216	216.5	5461209	1034968	41.0295
ECL20814	394	217	5373897	5298582	280	257977	5343984	50.73	72088	34620	21	47	13.1%	0.51	217	218	5343984	1039888	42.4207
ECL20836	290	145	5479175	5416113	196	466695	5452435	50.63	127779	68959	13	25	15.2%	0.5	250	251	5452435	986918	45.4323
ECL20846	470	300	5577839	5506591	354	203965	5545128	50.60	51126	23773	33	72	8.3%	0.5	254	255	5545128	352100	16.1918
ECL20850	388	204	5420255	5342143	264	271276	5385458	50.63	102309	41167	17	38	10.0%	0.51	246	247	5385458	510262	23.4028
ECL20887	377	207	5426967	5354561	267	390064	5396956	50.67	107634	43051	18	37	13.3%	0.51	170	170	5396956	1053912	33.1974
ECL20896	361	167	5489770	5413972	220	475937	5452204	50.66	127778	67369	13	27	22.9%	0.5	268	268.5	5452204	3002440	147.859
ECL20906	335	130	5490403	5423005	173	694737	5452685	50.58	124455	63483	12	27	25.2%	0.5	232	233	5452685	1920432	82.0624
ECL20911	415	182	5516684	5420221	256	466697	5472847	50.66	127090	63583	15	29	21.9%	0.51	214	214.5	5472847	2244848	87.9834
ECL20918	348	170	5513733	5436013	235	311489	5481641	50.64	130187	63538	14	28	8.1%	0.5	256	257	5481641	599094	28.0878
ECL20924	287	161	5382965	5329301	203	346520	5360436	50.66	127778	63531	14	29	16.0%	0.5	226	226.5	5360436	956836	40.4302
ECL21170	696	188	5116673	4975475	262	187379	5026076	50.44	61019	34271	24	52	26.0%	0.49	208	208	5026076	1544170	63.9042
ECL21259	478	173	5501725	5384797	260	310988	5445678	50.64	127038	60304	15	29	12.1%	0.5	220	220.5	5445678	818904	33.1581
ECL21274	326	192	5439138	5381880	238	281793	5414689	50.74	119216	45753	17	35	20.9%	0.51	173	173.5	5414689	1971154	63.1606
ECL21290	378	168	5383019	5295827	234	426279	5343709	50.67	127779	68957	13	26	25.1%	0.51	285	285.5	5343709	1763522	94.2202
ECL21405	266	140	5589966	5541784	174	466693	5566145	50.48	139498	71715	12	25	9.3%	0.5	256	256.5	5566145	717962	33.0852
ECL21412	412	203	5590183	5496709	279	354093	5552023	50.68	127086	47147	15	32	6.8%	0.5	242	243	5552023	514686	22.5267
ECL21415	301	145	5311901	5249740	195	419586	5286146	50.71	137232	68957	13	26	29.5%	0.5	181	181.5	5286146	4303378	147.757
ECL21464	267	179	4815436	4784364	201	230946	4800883	50.80	66249	33632	22	48	24.2%	0.51	179	179	4800883	2109954	78.6692
ECL21483	393	252	5467146	5405252	308	190385	5443999	50.66	67708	29625	24	52	6.5%	0.5	245	246	5443999	409412	18.5003
ECL21505	282	166	5400286	5353148	202	346692	5378482	50.64	125253	67369	14	29	9.3%	0.5	252	252.5	5378482	628250	29.494
ECL21512	461	223	5462113	5376351	275	337022	5414136	50.60	102211	41347	18	37	11.3%	0.5	173	174	5414136	995476	31.9927
ECL21518	279	136	5360439	5305328	175	339152	5332538	50.67	127031	71715	14	26	10.0%	0.5	256	257	5332538	743450	35.8303
ECL21541	499	214	5564814	5455550	293	310988	5512346	50.67	107904	49484	17	34	12.2%	0.51	197	199	5512346	1034134	37.333
ECL21542	298	156	5478088	5417468	204	432353	5451612	50.81	123709	71715	14	27	16.7%	0.51	216	218	5451612	1460776	58.4138
ECL21551	313	181	5480350	5424630	225	432722	5455287	50.69	130187	63531	13	27	15.7%	0.51	197	198.5	5455287	1623804	59.0849
ECL21584	450	192	5575664	5473880	269	335708	5528954	50.54	108166	42046	15	35	21.2%	0.5	163	165	5528954	2841848	84.809
ECL21628	364	192	5520848	5446392	258	435383	5492250	50.58	125253	63531	14	29	14.2%	0.5	211	213.5	5492250	1194086	46.4177
ECL21652	350	192	5540367	5480739	235	235177	5512013	50.81	121935	53872	17	33	11.3%	0.51	181	182.5	5512013	931174	30.8307
ECL21655	334	162	5575733	5504922	215	346503	5542329	50.69	124139	63963	15	29	19.5%	0.5	206	207.5	5542329	1917804	71.8009
ECL21657	357	185	5604295	5530463	246	346512	5573689	50.79	125253	67369	16	30	14.0%	0.51	198	199	5573689	1461168	52.1688
ECL21676	291	161	5573980	5523692	198	466697	5549289	50.79	127089	71715	14	27	15.6%	0.5	208	209.5	5549289	1464606	55.2927
ECL21680	355	180	5418625	5343271	244	466697	5388246	50.65	130187	63580	13	26	15.2%	0.51	178	178.5	5388246	1579928	52.3393
ECL21730	279	140	5399821	5338698	190	466921	5373370	50.68	127779	71715	13	25	16.7%	0.5	204	205.5	5373370	1565724	59.8798
ECL21732	308	218	4734457	4701359	243	147274	4720411	50.89	50154	23930	29	63	16.2%	0.51	177	177	4720411	1098746	41.1994
ECL21756	222	119	5394350	5350999	157	379936	5377199	50.63	127323	65018	13	27	20.6%	0.5	179	180	5377199	2357194	78.9063
ECL21837	351	172	5415882	5343905	226	434143	5381579	50.65	125253	67369	14	28	17.4%	0.5	197	198.5	5381579	1852814	68.3412
ECL21975	448	265	5362509	5289136	331	142489	5334536	50.82	60588	25563	29	62	11.0%	0.51	184	184.5	5334536	929034	32.1315
ECL21979	570	370	5474564	5390720	436	110552	5439483	50.90	35133	16749	46	100	10.0%	0.51	190	190.5	5439483	784298	27.4675
ECL22052	382	188	5496392	5421119	243	343010	5460291	50.63	121146	50990	15	32	29.8%	0.5	162	162.5	5460291	2041050	60.7423
ECL22093	261	154	5385860	5343135	184	432710	5364825	50.69	123709	63963	14	28	23.3%	0.51	203	203.5	5364825	2296620	87.116
ECL22099	511	177	5365609	5255136	240	279378	5299242	50.58	123709	45468	16	33	17.1%	0.5	194	194.5	5299242	1574378	57.785
ECL22128	432	176	5507282	5408545	250	466471	5460892	50.63	127038	63483	14	29	16.1%	0.5	196	196.5	5460892	1594522	57.3759
ECL22134	357	191	5427908	5356543	249	309746	5397374	50.66	123709	55803	16	30	16.6%	0.5	205	205.5	5397374	1243030	47.3272
ECL22146	325	217	4917577	4876361	248	203316	4899380	50.84	59316	26132	25	55	38.0%	0.51	182	182	4899380	1877606	69.7485
ECL22172	385	216	4928030	4870283	255	210738	4897051	50.80	66249	25093	22	54	29.7%	0.51	177	177	4897051	2680452	96.8828
ECL22215	572	251	5704622	5592970	317	279377	5640872	50.40	107623	37737	18	41	15.1%	0.5	167	167.5	5640872	1435308	42.62
ECL22265	489	207	5672143	5570563	272	230994	5616134	50.39	121146	45155	18	36	20.4%	0.5	169	169.5	5616134	1999984	60.3613
ECL22274	397	174	5359679	5274249	235	337813	5317551	50.67	130187	63531	14	28	18.6%	0.5	165	165.5	5317551	2022952	62.961
ECL22293	447	237	5350744	5271057	292	212212	5309870	50.70	85401	32621	21	47	16.7%	0.51	158	158	5309870	1601134	47.6432
ECL22298	347	184	5338358	5269459	237	391930	5307020	50.72	121146	52057	16	33	21.3%	0.51	164	164.5	5307020	2248704	69.7024
ECL22341	237	139	5374628	5333057	177	333403	5359023	50.66	109186	51039	16	34	21.3%	0.51	168	168	5359023	2387472	74.8449
ECL22433	403	186	5592708	5507307	245	436585	5548854	50.42	109382	47179	18	37	17.5%	0.5	187	187.5	5548854	1343444	45.396
ECL22438	382	173	5549371	5463553	237	311489	5508983	50.68	122508	51044	16	32	19.2%	0.5	188	188.5	5508983	878824	30.0706
ECL22447	299	154	5467637	5408014	203	466697	5442844	50.66	130187	67369	12	26	17.7%	0.5	192	192.5	5442844	1644830	58.1736
ECL22487	337	158	5459947	5394352	207	359000	5428175	50.57	116391	50881	15	32	14.8%	0.5	204	204.5	5428175	1278624	48.1706
ECL22491	360	206	5489028	5423483	258	235257	5460333	50.70	102309	39976	19	39	19.8%	0.51	192	192.5	5460333	1570680	55.3732
ECL22503	389	166	5398901	5306610	242	426285	5359471	50.61	127779	67369	13	26	16.6%	0.5	216	216	5359471	1333692	53.7511
ECL22505	432	193	5534178	5435361	269	363452	5489269	50.63	121936	57469	15	30	24.2%	0.51	187	187.5	5489269	2189976	74.8042
ECL22529	340	206	5376166	5329014	242	157063	5353609	50.72	69018	35034	24	50	14.6%	0.51	201	201.5	5353609	1116236	42.0131
ECL22536	288	169	5352108	5304121	206	339152	5329959	50.70	112214	63964	14	29	23.9%	0.51	189	189.5	5329959	1926888	68.5081
ECL22553	294	164	5398869	5345166	204	432324	5373295	50.64	127779	63580	13	28	22.1%	0.5	201	201.5	5373295	1349386	50.6023
ECL22653	314	179	5414261	5362905	217	332887	5390025	50.64	102206	40761	16	36	11.7%	0.51	191	191.5	5390025	876324	31.1346
ECL22730	277	183	4774536	4739136	209	252395	4758803	50.81	62352	31363	21	48	10.3%	0.5	208	208.5	4758803	853494	37.3946
ECL22741	379	177	5513558	5439640	235	268849	5478916	50.61	98185	46851	18	38	17.2%	0.5	191	191.5	5478916	1646046	57.5329
ECL22749	280	177	4891586	4852107	211	252395	4876356	50.83	67715	34316	20	45	13.4%	0.5	219	219.5	4876356	1016906	45.7741
ECL22774	229	131	5262845	5228995	155	453116	5244805	50.62	109228	63071	14	29	20.4%	0.5	187	187.5	5244805	1663480	59.4688
ECL22800	344	167	5368565	5296421	222	343102	5334532	50.66	127090	63963	14	27	20.5%	0.51	191	191.5	5334532	1591430	57.1294
ECL22867	381	239	5298430	5248207	272	196439	5271155	50.78	69194	30737	27	53	15.6%	0.51	186	186.5	5271155	1113150	39.3846
ECL22868	290	155	5339767	5285559	195	432343	5314593	50.69	130187	67369	13	26	18.6%	0.5	193	180.5	5314593	1592100	54.0726
ECL22882	286	174	4783444	4742767	203	252395	4764620	50.83	67715	32454	21	46	38.6%	0.5	168	168	4764620	5558358	195.987
ECL22887	356	171	5481241	5405546	229	249224	5447197	50.66	127031	52437	17	32	17.3%	0.5	206	206.5	5447197	1173564	44.4891
ECL22967	422	196	5579446	5483481	271	432663	5537966	50.68	121936	51125	16	33	20.6%	0.51	180	180.5	5537966	1673306	54.5384
ECL23013	389	203	5624787	5550098	263	235177	5592916	50.71	120291	45990	18	36	18.4%	0.5	190	190.5	5592916	1313594	44.7423
ECL23067	293	144	5336603	5279178	185	432343	5308419	50.67	126844	68957	14	27	12.4%	0.5	213	213	5308419	931108	37.3607
ECL85531	349	165	5651651	5568017	239	375319	5622381	50.69	178853	63963	11	24	13.1%	0.5	256	256.5	5622381	1057526	48.2456
																		mean	61.5899
																		min	16.1918
																		max	195.987

## Sheet: data description
ID_isolate	name of the isolate in the APZEC database
contig>=0	is total number of contigs of length ≥ 0bp
contig>=1000	is total number of contigs of length ≥ 1000 bp
Total length >=0bp	is the total number of bases in contigs of length ≥ 0 bp
Total length >=1000bp	is the total number of bases in contigs of length ≥ 1000 bp
nb of contigs	is the total number of contigs in the assembly.
Largest contig	is the length of the longest contig in the assembly
Total length	is the total number of bases in the assembly
GC	is the total number of G and C nucleotides in the assembly, divided by the total length of the assembly
N50	is the length for which the collection of all contigs of that length or longer covers at least half an assembly
N75	is the length for which the collection of all contigs of that length or longer covers at least 3/4 an assembly
L50	is the number of contigs equal to or longer than N50
L75	is the number of contigs equal to or longer than N75
% Dups	% of duplicates read
% GC	average % GC content
Length (bp)	average sequence length calculated with multiQC
mean_length (=Q)	average sequence length measured with illumina
Total length (=S)	total sequence (illumina data)
Nb_read (=T)	number of reads for the sample in each illumina run
depth	caltulation of the depth : Q*T/S
