# Supplementary material for: High Risk Clone: A Proposal of Criteria Adapted to the One Health Context with Application to Enterotoxigenic Escherichia coli in the Pig Population
Source: Antibiotics (Basel). 2021 Feb 28;10(3):244. doi: 10.3390/antibiotics10030244 (PMC8000703; doi:10.3390/antibiotics10030244)
Supplement: Supplementary file 1 [file antibiotics-10-00244-s001.zip › TableS3_virulencefinderresults.xlsx]

## Sheet: vf_total_2
ID_isolate	K88ab	astA	gad	iha	ltcA	sepA	sta1	stb	terC	traT	capU	cia	ireA	papC	cib	cea	cba	cma	hra	etsC	iss	mchB	mchC	mchF	mcmA	etpD	fyuA	irp2	lpfA	celb	ehxA	ompT	clonal_lineage	clone
ECL00103	K88ab:10:AJ61623	astA:3:AB042005			ltcA:10:EU113243	sepA:2:AY604009			terC:23:MG59169	traT:155:NZ_CP032205	capU:5:CU928145	cia:36:QMGM01000002			cib:4:AY913944	cea:12:UCZI0100006			hra:5:U07174		iss:8:CP001665	mchB:2:AJ009631	mchC:3:AJ515252	mchF:5:AJ515252	mcmA:4:AJ586887	etpD:1:AB011549	fyuA:4:AHAX01000032	irp2:204:NZ_NBCK01000028	lpfA:2:AE014073				D
ECL00351	K88ab:9:M25302	astA:6:AY545598	gad:17:U00096	iha:14:AE005174	ltcA:10:EU113243				terC:8:CP006262	traT:73:AGTD01000004	capU:3:CP002729						cba:14:FJ664743	cma:5:FJ664737	hra:10:JF808724														A	3
ECL00652	K88ab:9:M25302	astA:6:AY545598	gad:17:U00096	iha:14:AE005174	ltcA:10:EU113243				terC:8:CP006262	traT:61:AKKX01000148	capU:3:CP002729						cba:14:FJ664743	cma:5:FJ664737	hra:10:JF808724														A	3
ECL01302	K88ab:9:M25302	astA:3:AB042005	gad:17:U00096		ltcA:10:EU113243	sepA:2:AY604009			terC:23:MG59169		capU:5:CU928145	cia:14:GG772897			cib:4:AY913944						iss:8:CP001665						fyuA:4:AHAX01000032	irp2:204:NZ_NBCK01000028	lpfA:2:AE014073	celb:10:D00021			D
ECL01669	K88ab:9:M25302	astA:3:AB042005	gad:17:U00096		ltcA:10:EU113243	sepA:2:AY604009			terC:23:MG59169	traT:155:NZ_CP032205	capU:5:CU928145					cea:9:LAUC01000234					iss:8:CP001665						fyuA:4:AHAX01000032	irp2:204:NZ_NBCK01000028	lpfA:2:AE014073				D
ECL01947	K88ab:9:M25302	astA:3:AB042005	gad:20:AP010953					stb:1:AY028790	terC:23:MG59169	traT:155:NZ_CP032205	capU:5:CU928145					cea:9:LAUC01000234					iss:8:CP001665						fyuA:4:AHAX01000032	irp2:204:NZ_NBCK01000028	lpfA:2:AE014073				NA
ECL02602	K88ab:8:EU570252	astA:3:AB042005	gad:15:AP009240		ltcA:10:EU113243	sepA:2:AY604009		stb:1:AY028790	terC:23:MG59169							cea:9:LAUC01000234					iss:8:CP001665						fyuA:4:AHAX01000032	irp2:204:NZ_NBCK01000028	lpfA:2:AE014073				D
ECL02964	K88ab:10:AJ61623	astA:3:AB042005	gad:17:U00096		ltcA:10:EU113243			stb:1:AY028790	terC:23:MG59169		capU:5:CU928145					cea:9:LAUC01000234					iss:8:CP001665						fyuA:4:AHAX01000032	irp2:204:NZ_NBCK01000028	lpfA:2:AE014073				D
ECL03391	K88ab:9:M25302	astA:3:AB042005	gad:17:U00096		ltcA:10:EU113243	sepA:2:AY604009		stb:1:AY028790	terC:23:MG59169	traT:15:AY686591	capU:5:CU928145	cia:1:APXL01000039			cib:2:HQ114281	cea:12:UCZI0100006					iss:8:CP001665						fyuA:4:AHAX01000032	irp2:204:NZ_NBCK01000028	lpfA:2:AE014073				D
ECL04323	K88ab:9:M25302	astA:3:AB042005	gad:17:U00096		ltcA:10:EU113243	sepA:2:AY604009		stb:1:AY028790	terC:23:MG59169		capU:5:CU928145										iss:8:CP001665						fyuA:4:AHAX01000032	irp2:204:NZ_NBCK01000028	lpfA:2:AE014073				D
ECL04937	K88ab:9:M25302	astA:3:AB042005	gad:17:U00096		ltcA:10:EU113243	sepA:2:AY604009		stb:1:AY028790	terC:23:MG59169	traT:155:NZ_CP032205	capU:5:CU928145										iss:8:CP001665						fyuA:4:AHAX01000032	irp2:204:NZ_NBCK01000028	lpfA:2:AE014073				D
ECL05380	K88ab:8:EU570252	astA:3:AB042005	gad:26:CP004009		ltcA:10:EU113243	sepA:2:AY604009		stb:1:AY028790	terC:23:MG59169	traT:155:NZ_CP032205	capU:5:CU928145					cea:9:LAUC01000234					iss:8:CP001665						fyuA:4:AHAX01000032	irp2:204:NZ_NBCK01000028	lpfA:2:AE014073				E
ECL05543	K88ab:10:AJ61623	astA:3:AB042005							terC:23:MG59169	traT:155:NZ_CP032205	capU:5:CU928145					cea:9:LAUC01000234					iss:8:CP001665						fyuA:4:AHAX01000032	irp2:204:NZ_NBCK01000028	lpfA:2:AE014073				D
ECL05958	K88ab:8:EU570252	astA:3:AB042005	gad:17:U00096		ltcA:10:EU113243	sepA:2:AY604009		stb:1:AY028790	terC:23:MG59169												iss:8:CP001665						fyuA:4:AHAX01000032	irp2:204:NZ_NBCK01000028	lpfA:2:AE014073				E
ECL06007	K88ab:10:AJ61623	astA:3:AB042005	gad:17:U00096		ltcA:10:EU113243	sepA:2:AY604009		stb:1:AY028790	terC:23:MG59169	traT:155:NZ_CP032205	capU:5:CU928145	cia:19:UDDL01000017			cib:4:AY913944				hra:5:U07174		iss:8:CP001665	mchB:2:AJ009631	mchC:3:AJ515252	mchF:5:AJ515252	mcmA:4:AJ586887	etpD:1:AB011549	fyuA:4:AHAX01000032	irp2:204:NZ_NBCK01000028	lpfA:2:AE014073				D
ECL07310	K88ab:9:M25302	astA:3:AB042005	gad:20:AP010953		ltcA:10:EU113243	sepA:2:AY604009		stb:1:AY028790	terC:23:MG59169		capU:5:CU928145					cea:9:LAUC01000234					iss:8:CP001665						fyuA:4:AHAX01000032	irp2:204:NZ_NBCK01000028	lpfA:2:AE014073				D
ECL07805	K88ab:6:CP002730	astA:10:L11241	gad:17:U00096	iha:14:AE005174	ltcA:10:EU113243	sepA:2:AY604009	sta1:1:M25607	stb:1:AY028790	terC:8:CP006262	traT:56:CYCV01000028	capU:3:CP002729																						A	2
ECL08334	K88ab:9:M25302		gad:17:U00096			sepA:2:AY604009			terC:23:MG59169							cea:9:LAUC01000234					iss:8:CP001665						fyuA:4:AHAX01000032	irp2:204:NZ_NBCK01000028	lpfA:2:AE014073				E
ECL08786	K88ab:9:M25302	astA:3:AB042005	gad:17:U00096		ltcA:10:EU113243	sepA:2:AY604009		stb:1:AY028790	terC:23:MG59169		capU:5:CU928145					cea:9:LAUC01000234					iss:8:CP001665						fyuA:4:AHAX01000032	irp2:204:NZ_NBCK01000028	lpfA:2:AE014073				D
ECL09114	K88ab:6:CP002730		gad:17:U00096	iha:14:AE005174		sepA:2:AY604009			terC:8:CP006262	traT:61:AKKX01000148	capU:3:CP002729																						A	2
ECL09646	K88ab:9:M25302	astA:3:AB042005	gad:27:U00096	iha:14:AE005174	ltcA:10:EU113243			stb:1:AY028790	terC:8:CP006262	traT:73:AGTD01000004	capU:3:CP002729						cba:14:FJ664743	cma:5:FJ664737	hra:10:JF808724														A	3
ECL10170	K88ab:6:CP002730	astA:3:AB042005	gad:17:U00096	iha:14:AE005174	ltcA:10:EU113243	sepA:2:AY604009	sta1:1:M25607	stb:1:AY028790	terC:8:CP006262	traT:56:CYCV01000028	capU:3:CP002729																						A	2
ECL10647	K88ab:9:M25302	astA:3:AB042005	gad:17:U00096	iha:14:AE005174	ltcA:10:EU113243			stb:1:AY028790	terC:8:CP006262	traT:73:AGTD01000004	capU:3:CP002729						cba:14:FJ664743	cma:5:FJ664737	hra:10:JF808724														A	3
ECL11171	K88ab:9:M25302	astA:10:L11241	gad:17:U00096	iha:14:AE005174	ltcA:10:EU113243				terC:8:CP006262	traT:61:AKKX01000148	capU:3:CP002729								hra:10:JF808724														A	3
ECL11324	K88ab:6:CP002730	astA:3:AB042005	gad:27:U00096	iha:14:AE005174	ltcA:10:EU113243	sepA:2:AY604009	sta1:1:M25607	stb:1:AY028790	terC:8:CP006262	traT:56:CYCV01000028	capU:3:CP002729																						A	2
ECL13086	K88ab:6:CP002730	astA:3:AB042005	gad:17:U00096	iha:14:AE005174	ltcA:10:EU113243	sepA:2:AY604009	sta1:1:M25607	stb:1:AY028790	terC:8:CP006262	traT:56:CYCV01000028	capU:3:CP002729																						A	2
ECL13345	K88ab:6:CP002730	astA:3:AB042005		iha:14:AE005174	ltcA:10:EU113243	sepA:2:AY604009	sta1:1:M25607	stb:1:AY028790	terC:8:CP006262	traT:56:CYCV01000028	capU:3:CP002729																						A	2
ECL14048	K88ab:9:M25302	astA:10:L11241	gad:17:U00096	iha:14:AE005174	ltcA:10:EU113243			stb:1:AY028790	terC:8:CP006262	traT:73:AGTD01000004	capU:3:CP002729						cba:14:FJ664743	cma:5:FJ664737	hra:10:JF808724														A	3
ECL14672	K88ab:6:CP002730	astA:3:AB042005	gad:17:U00096		ltcA:10:EU113243	sepA:2:AY604009		stb:1:AY028790	terC:23:MG59169	traT:173:UEKA01000045											iss:8:CP001665								lpfA:2:AE014073				F
ECL16273	K88ab:7:AJ616239	astA:3:AB042005	gad:17:U00096	iha:14:AE005174	ltcA:10:EU113243			stb:1:AY028790	terC:8:CP006262	traT:73:AGTD01000004	capU:3:CP002729	cia:32:UCVA01000007				cea:9:LAUC01000234			hra:10:JF808724								fyuA:4:AHAX01000032	irp2:204:NZ_NBCK01000028					B
ECL17377	K88ab:7:AJ616239	astA:3:AB042005	gad:17:U00096	iha:14:AE005174	ltcA:10:EU113243			stb:1:AY028790	terC:8:CP006262	traT:73:AGTD01000004	capU:3:CP002729	cia:32:UCVA01000007							hra:10:JF808724								fyuA:4:AHAX01000032	irp2:204:NZ_NBCK01000028					B
ECL17896	K88ab:9:M25302	astA:3:AB042005	gad:20:AP010953		ltcA:10:EU113243			stb:1:AY028790	terC:20:UGER010			cia:36:QMGM01000002			cib:4:AY913944	cea:9:LAUC01000234											fyuA:4:AHAX01000032	irp2:204:NZ_NBCK01000028	lpfA:2:AE014073				E
ECL18172	K88ab:6:CP002730	astA:3:AB042005	gad:17:U00096	iha:14:AE005174	ltcA:10:EU113243	sepA:2:AY604009	sta1:1:M25607	stb:1:AY028790	terC:8:CP006262	traT:61:AKKX01000148																							A	2
ECL18573	K88ab:9:M25302	astA:3:AB042005	gad:17:U00096	iha:14:AE005174				stb:1:AY028790	terC:8:CP006262	traT:61:AKKX01000148	capU:3:CP002729						cba:12:FJ664745	cma:5:FJ664737	hra:10:JF808724														A	3
ECL18728	K88ab:6:CP002730	astA:3:AB042005	gad:17:U00096	iha:14:AE005174	ltcA:10:EU113243				terC:8:CP006262	traT:61:AKKX01000148	capU:3:CP002729	cia:1:APXL01000039			cib:2:HQ114281																		A	2
ECL19125	K88ab:9:M25302	astA:3:AB042005	gad:17:U00096	iha:14:AE005174	ltcA:10:EU113243			stb:1:AY028790	terC:8:CP006262	traT:61:AKKX01000148	capU:3:CP002729								hra:10:JF808724														A	3
ECL19146	K88ab:9:M25302	astA:3:AB042005	gad:17:U00096	iha:14:AE005174	ltcA:10:EU113243			stb:1:AY028790	terC:8:CP006262	traT:73:AGTD01000004							cba:14:FJ664743	cma:5:FJ664737
ECL19148	K88ab:9:M25302	astA:3:AB042005			ltcA:10:EU113243			stb:1:AY028790	terC:20:UGER010							cea:9:LAUC01000234					iss:8:CP001665						fyuA:4:AHAX01000032	irp2:204:NZ_NBCK01000028	lpfA:2:AE014073				E
ECL19153	K88ab:9:M25302	astA:3:AB042005	gad:17:U00096		ltcA:10:EU113243			stb:1:AY028790	terC:20:UGER010							cea:9:LAUC01000234					iss:8:CP001665						fyuA:4:AHAX01000032	irp2:204:NZ_NBCK01000028	lpfA:2:AE014073				E
ECL19159	K88ab:9:M25302	astA:3:AB042005	gad:17:U00096	iha:14:AE005174	ltcA:10:EU113243			stb:1:AY028790	terC:8:CP006262	traT:73:AGTD01000004	capU:3:CP002729	cia:30:UGDV01000002			cib:4:AY913944		cba:14:FJ664743	cma:5:FJ664737															A	0
ECL19187	K88ab:9:M25302	astA:3:AB042005	gad:17:U00096	iha:14:AE005174	ltcA:10:EU113243			stb:1:AY028790	terC:8:CP006262	traT:73:AGTD01000004	capU:3:CP002729						cba:14:FJ664743	cma:5:FJ664737	hra:10:JF808724														A	3
ECL19345	K88ab:9:M25302	astA:10:L11241	gad:17:U00096	iha:14:AE005174					terC:8:CP006262	traT:61:AKKX01000148	capU:3:CP002729	cia:1:APXL01000039			cib:2:HQ114281				hra:10:JF808724														A	3
ECL19373	K88ab:7:AJ616239	astA:3:AB042005	gad:17:U00096	iha:14:AE005174	ltcA:10:EU113243			stb:1:AY028790	terC:8:CP006262	traT:61:AKKX01000148	capU:3:CP002729	cia:1:APXL01000039			cib:2:HQ114281																		A	0
ECL19390	K88ab:7:AJ616239	astA:3:AB042005	gad:17:U00096	iha:14:AE005174	ltcA:10:EU113243			stb:1:AY028790	terC:8:CP006262	traT:73:AGTD01000004	capU:3:CP002729						cba:14:FJ664743	cma:5:FJ664737															A	0
ECL19403	K88ab:9:M25302		gad:17:U00096	iha:14:AE005174	ltcA:10:EU113243				terC:8:CP006262	traT:61:AKKX01000148	capU:3:CP002729								hra:10:JF808724														A	3
ECL19414	K88ab:7:AJ616239	astA:6:AY545598	gad:17:U00096	iha:14:AE005174	ltcA:10:EU113243				terC:8:CP006262	traT:73:AGTD01000004	capU:3:CP002729	cia:1:APXL01000039			cib:1:KP198616																		A	0
ECL19427			gad:17:U00096	iha:14:AE005174	ltcA:10:EU113243				terC:8:CP006262	traT:73:AGTD01000004	capU:3:CP002729	cia:1:APXL01000039			cib:1:KP198616		cba:14:FJ664743	cma:5:FJ664737															A	0
ECL19508	K88ab:7:AJ616239	astA:3:AB042005	gad:17:U00096	iha:14:AE005174	ltcA:10:EU113243	sepA:2:AY604009		stb:1:AY028790	terC:8:CP006262	traT:11:CP000796	capU:3:CP002729	cia:1:APXL01000039			cib:2:HQ114281		cba:14:FJ664743	cma:5:FJ664737			iss:6:CP001846												A	4
ECL19517		astA:3:AB042005	gad:17:U00096	iha:14:AE005174	ltcA:10:EU113243	sepA:2:AY604009			terC:8:CP006262	traT:61:AKKX01000148	capU:3:CP002729																						A	2
ECL19555	K88ab:9:M25302	astA:3:AB042005	gad:17:U00096	iha:14:AE005174	ltcA:10:EU113243			stb:1:AY028790	terC:8:CP006262	traT:73:AGTD01000004	capU:3:CP002729	cia:30:UGDV01000002			cib:4:AY913944		cba:14:FJ664743	cma:5:FJ664737															A	0
ECL19602	K88ab:7:AJ616239	astA:3:AB042005	gad:17:U00096	iha:14:AE005174	ltcA:10:EU113243			stb:1:AY028790	terC:8:CP006262	traT:73:AGTD01000004	capU:3:CP002729	cia:36:QMGM01000002					cba:6:FJ664720	cma:16:FJ66472	hra:10:JF808724								fyuA:4:AHAX01000032	irp2:204:NZ_NBCK01000028					B
ECL19641	K88ab:7:AJ616239	astA:3:AB042005	gad:17:U00096	iha:14:AE005174	ltcA:10:EU113243	sepA:2:AY604009		stb:1:AY028790	terC:8:CP006262	traT:11:CP000796	capU:3:CP002729						cba:14:FJ664743	cma:5:FJ664737			iss:6:CP001846												A	4
ECL19664	K88ab:6:CP002730	astA:3:AB042005	gad:17:U00096	iha:14:AE005174	ltcA:10:EU113243	sepA:2:AY604009	sta1:1:M25607	stb:3:CP000913	terC:8:CP006262	traT:56:CYCV01000028	capU:3:CP002729																						A	1
ECL19668	K88ab:6:CP002730	astA:6:AY545598	gad:17:U00096	iha:14:AE005174	ltcA:10:EU113243	sepA:2:AY604009	sta1:1:M25607	stb:3:CP000913	terC:8:CP006262	traT:56:CYCV01000028	capU:3:CP002729																						A	1
ECL19751	K88ab:9:M25302	astA:3:AB042005	gad:17:U00096	iha:14:AE005174	ltcA:10:EU113243			stb:1:AY028790	terC:8:CP006262	traT:73:AGTD01000004	capU:3:CP002729						cba:14:FJ664743	cma:5:FJ664737															A	0
ECL19755	K88ab:6:CP002730	astA:3:AB042005	gad:17:U00096	iha:14:AE005174	ltcA:10:EU113243			stb:1:AY028790	terC:8:CP006262	traT:61:AKKX01000148	capU:3:CP002729																						A	0
ECL19763	K88ab:7:AJ616239	astA:3:AB042005	gad:17:U00096	iha:14:AE005174	ltcA:10:EU113243			stb:1:AY028790	terC:8:CP006262	traT:73:AGTD01000004	capU:3:CP002729	cia:19:UDDL01000017			cib:4:AY913944		cba:14:FJ664743	cma:5:FJ664737															A	0
ECL19788	K88ab:6:CP002730	astA:3:AB042005	gad:17:U00096		ltcA:10:EU113243			stb:1:AY028790	terC:23:MG59169	traT:73:AGTD01000004							cba:14:FJ664743	cma:5:FJ664737			iss:8:CP001665						fyuA:4:AHAX01000032	irp2:204:NZ_NBCK01000028	lpfA:2:AE014073				E
ECL19820	K88ab:7:AJ616239	astA:3:AB042005	gad:17:U00096	iha:14:AE005174	ltcA:10:EU113243			stb:1:AY028790	terC:8:CP006262	traT:73:AGTD01000004	capU:3:CP002729	cia:32:UCVA01000007				cea:9:LAUC01000234			hra:10:JF808724								fyuA:4:AHAX01000032	irp2:204:NZ_NBCK01000028					B
ECL19885	K88ab:7:AJ616239	astA:3:AB042005	gad:17:U00096	iha:14:AE005174	ltcA:10:EU113243			stb:1:AY028790	terC:8:CP006262	traT:73:AGTD01000004	capU:3:CP002729	cia:36:QMGM01000002			cib:4:AY913944		cba:14:FJ664743	cma:5:FJ664737															A	0
ECL19889	K88ab:9:M25302	astA:3:AB042005	gad:27:U00096	iha:14:AE005174	ltcA:10:EU113243			stb:1:AY028790	terC:8:CP006262	traT:56:CYCV01000028	capU:3:CP002729								hra:10:JF808724														A	3
ECL19894	K88ab:7:AJ616239	astA:3:AB042005	gad:17:U00096	iha:14:AE005174	ltcA:10:EU113243	sepA:2:AY604009		stb:1:AY028790	terC:8:CP006262	traT:11:CP000796	capU:3:CP002729						cba:14:FJ664743	cma:5:FJ664737			iss:6:CP001846												A	4
ECL19901	K88ab:9:M25302	astA:10:L11241	gad:17:U00096	iha:14:AE005174					terC:8:CP006262	traT:61:AKKX01000148	capU:3:CP002729								hra:10:JF808724														A	3
ECL19902	K88ab:9:M25302	astA:10:L11241	gad:17:U00096	iha:14:AE005174	ltcA:10:EU113243				terC:8:CP006262	traT:73:AGTD01000004	capU:3:CP002729						cba:14:FJ664743	cma:5:FJ664737	hra:10:JF808724														A	3
ECL19916	K88ab:6:CP002730	astA:3:AB042005	gad:27:U00096	iha:14:AE005174	ltcA:10:EU113243			stb:1:AY028790	terC:8:CP006262	traT:56:CYCV01000028	capU:3:CP002729																						A	1
ECL19931	K88ab:7:AJ616239	astA:3:AB042005	gad:17:U00096	iha:14:AE005174					terC:8:CP006262	traT:56:CYCV01000028	capU:3:CP002729								hra:10:JF808724								fyuA:4:AHAX01000032	irp2:204:NZ_NBCK01000028					B
ECL19939	K88ab:7:AJ616239		gad:27:U00096	iha:14:AE005174		sepA:2:AY604009			terC:8:CP006262	traT:11:CP000796	capU:3:CP002729						cba:14:FJ664743	cma:5:FJ664737			iss:6:CP001846												A	4
ECL19990	K88ab:7:AJ616239	astA:3:AB042005	gad:17:U00096	iha:14:AE005174	ltcA:10:EU113243			stb:1:AY028790	terC:8:CP006262	traT:73:AGTD01000004	capU:3:CP002729								hra:10:JF808724								fyuA:4:AHAX01000032	irp2:204:NZ_NBCK01000028					B
ECL20013	K88ab:6:CP002730	astA:10:L11241	gad:27:U00096	iha:14:AE005174	ltcA:10:EU113243				terC:8:CP006262	traT:56:CYCV01000028	capU:3:CP002729																						A	1
ECL20014	K88ab:6:CP002730	astA:10:L11241	gad:27:U00096	iha:14:AE005174		sepA:2:AY604009		stb:3:CP000913	terC:8:CP006262	traT:56:CYCV01000028	capU:3:CP002729																						A	1
ECL20015	K88ab:6:CP002730	astA:3:AB042005	gad:17:U00096	iha:14:AE005174	ltcA:10:EU113243	sepA:2:AY604009		stb:1:AY028790	terC:8:CP006262	traT:56:CYCV01000028	capU:3:CP002729																						A	1
ECL20018	K88ab:6:CP002730		gad:17:U00096	iha:14:AE005174	ltcA:10:EU113243	sepA:2:AY604009	sta1:1:M25607	stb:1:AY028790	terC:8:CP006262	traT:56:CYCV01000028	capU:3:CP002729																						A	1
ECL20209	K88ab:6:CP002730	astA:6:AY545598	gad:27:U00096	iha:14:AE005174	ltcA:10:EU113243	sepA:2:AY604009	sta1:1:M25607	stb:3:CP000913	terC:8:CP006262	traT:56:CYCV01000028	capU:3:CP002729	cia:1:APXL01000039			cib:1:KP198616	cea:12:UCZI0100006																	A	1
ECL20212	K88ab:6:CP002730	astA:6:AY545598	gad:17:U00096	iha:14:AE005174	ltcA:10:EU113243	sepA:2:AY604009	sta1:1:M25607	stb:3:CP000913	terC:8:CP006262	traT:56:CYCV01000028	capU:3:CP002729																						A	1
ECL20223	K88ab:6:CP002730	astA:3:AB042005	gad:20:AP010953						terC:23:MG59169	traT:73:AGTD01000004		cia:1:APXL01000039			cib:1:KP198616		cba:14:FJ664743	cma:5:FJ664737			iss:8:CP001665						fyuA:4:AHAX01000032	irp2:204:NZ_NBCK01000028	lpfA:2:AE014073				E
ECL20239	K88ab:6:CP002730	astA:10:L11241	gad:17:U00096	iha:14:AE005174		sepA:2:AY604009	sta1:1:M25607	stb:3:CP000913	terC:8:CP006262	traT:56:CYCV01000028	capU:3:CP002729	cia:1:APXL01000039			cib:1:KP198616																		A	1
ECL20256	K88ab:6:CP002730	astA:10:L11241	gad:17:U00096	iha:14:AE005174		sepA:2:AY604009	sta1:1:M25607	stb:3:CP000913	terC:8:CP006262	traT:56:CYCV01000028	capU:3:CP002729	cia:1:APXL01000039			cib:1:KP198616																		A	1
ECL20278	K88ab:6:CP002730	astA:6:AY545598	gad:17:U00096	iha:14:AE005174	ltcA:10:EU113243	sepA:2:AY604009	sta1:1:M25607	stb:3:CP000913	terC:8:CP006262	traT:56:CYCV01000028	capU:3:CP002729					cea:23:MG692707																	A	1
ECL20290	K88ab:6:CP002730	astA:10:L11241	gad:17:U00096	iha:14:AE005174	ltcA:10:EU113243	sepA:2:AY604009	sta1:1:M25607	stb:3:CP000913	terC:8:CP006262	traT:56:CYCV01000028	capU:3:CP002729	cia:1:APXL01000039			cib:1:KP198616	cea:9:LAUC01000234																	A	1
ECL20308	K88ab:7:AJ616239	astA:3:AB042005	gad:17:U00096	iha:14:AE005174	ltcA:10:EU113243	sepA:2:AY604009		stb:1:AY028790	terC:8:CP006262	traT:61:AKKX01000148	capU:3:CP002729	cia:36:QMGM01000002			cib:2:HQ114281						iss:6:CP001846												A	4
ECL20389	K88ab:6:CP002730	astA:10:L11241	gad:17:U00096	iha:14:AE005174		sepA:2:AY604009		stb:3:CP000913	terC:8:CP006262	traT:56:CYCV01000028	capU:3:CP002729																						A	1
ECL20395	K88ab:6:CP002730	astA:10:L11241	gad:17:U00096			sepA:2:AY604009	sta1:1:M25607	stb:3:CP000913	terC:23:MG59169	traT:13:NC_007675				papC:37:CP026853							iss:10:CP00400						fyuA:4:AHAX01000032	irp2:118:NZ_NOBR01000026	lpfA:2:AE014073		ehxA:4:X94129	ompT:49:CU928161	NA
ECL20404	K88ab:6:CP002730	astA:10:L11241	gad:17:U00096	iha:14:AE005174		sepA:2:AY604009	sta1:1:M25607	stb:3:CP000913	terC:8:CP006262	traT:56:CYCV01000028	capU:3:CP002729					cea:9:LAUC01000234																	A	1
ECL20408	K88ab:9:M25302	astA:3:AB042005	gad:17:U00096	iha:14:AE005174	ltcA:10:EU113243			stb:1:AY028790	terC:8:CP006262	traT:73:AGTD01000004	capU:3:CP002729	cia:30:UGDV01000002			cib:4:AY913944		cba:14:FJ664743	cma:5:FJ664737															A	0
ECL20435	K88ab:6:CP002730	astA:3:AB042005	gad:17:U00096	iha:14:AE005174	ltcA:10:EU113243	sepA:2:AY604009		stb:1:AY028790	terC:8:CP006262	traT:56:CYCV01000028	capU:3:CP002729																						A	1
ECL20436	K88ab:6:CP002730	astA:3:AB042005	gad:17:U00096	iha:14:AE005174	ltcA:10:EU113243	sepA:2:AY604009	sta1:1:M25607	stb:3:CP000913	terC:8:CP006262	traT:56:CYCV01000028	capU:3:CP002729	cia:1:APXL01000039			cib:1:KP198616	cea:9:LAUC01000234																	A	1
ECL20462	K88ab:9:M25302	astA:3:AB042005	gad:17:U00096		ltcA:10:EU113243			stb:1:AY028790	terC:23:MG59169												iss:8:CP001665						fyuA:4:AHAX01000032	irp2:204:NZ_NBCK01000028	lpfA:2:AE014073				E
ECL20544	K88ab:6:CP002730	astA:3:AB042005	gad:17:U00096	iha:14:AE005174	ltcA:10:EU113243	sepA:2:AY604009		stb:1:AY028790	terC:8:CP006262	traT:56:CYCV01000028	capU:3:CP002729																						A	1
ECL20550	K88ab:7:AJ616239		gad:17:U00096	iha:14:AE005174		sepA:2:AY604009			terC:8:CP006262	traT:11:CP000796	capU:3:CP002729	cia:19:UDDL01000017			cib:4:AY913944						iss:6:CP001846												A	4
ECL20566	K88ab:6:CP002730	astA:3:AB042005	gad:17:U00096	iha:14:AE005174	ltcA:10:EU113243	sepA:2:AY604009		stb:1:AY028790	terC:8:CP006262	traT:56:CYCV01000028	capU:3:CP002729	cia:19:UDDL01000017			cib:4:AY913944																		A	1
ECL20622	K88ab:6:CP002730	astA:3:AB042005	gad:17:U00096	iha:14:AE005174	ltcA:10:EU113243	sepA:2:AY604009		stb:1:AY028790	terC:8:CP006262	traT:56:CYCV01000028	capU:3:CP002729	cia:1:APXL01000039			cib:1:KP198616	cea:9:LAUC01000234																	A	1
ECL20627	K88ab:6:CP002730	astA:6:AY545598	gad:17:U00096	iha:14:AE005174	ltcA:10:EU113243	sepA:2:AY604009	sta1:1:M25607	stb:1:AY028790	terC:8:CP006262	traT:56:CYCV01000028	capU:3:CP002729																						A	11
ECL20721	K88ab:9:M25302	astA:3:AB042005	gad:17:U00096	iha:14:AE005174	ltcA:10:EU113243				terC:8:CP006262	traT:61:AKKX01000148	capU:3:CP002729	cia:30:UGDV01000002			cib:4:AY913944																		A	0
ECL20725	K88ab:6:CP002730	astA:3:AB042005	gad:17:U00096	iha:14:AE005174	ltcA:10:EU113243			stb:3:CP000913	terC:8:CP006262	traT:56:CYCV01000028	capU:3:CP002729																						A	1
ECL20769	K88ab:6:CP002730	astA:3:AB042005	gad:17:U00096	iha:14:AE005174	ltcA:10:EU113243			stb:1:AY028790	terC:8:CP006262	traT:56:CYCV01000028	capU:3:CP002729	cia:36:QMGM01000002																					A	1
ECL20776	K88ab:6:CP002730	astA:10:L11241	gad:17:U00096	iha:14:AE005174		sepA:2:AY604009	sta1:1:M25607	stb:3:CP000913	terC:8:CP006262	traT:56:CYCV01000028	capU:3:CP002729					cea:9:LAUC01000234																	A	1
ECL20778	K88ab:6:CP002730	astA:10:L11241	gad:17:U00096	iha:14:AE005174		sepA:2:AY604009		stb:1:AY028790	terC:8:CP006262	traT:56:CYCV01000028	capU:3:CP002729	cia:30:UGDV01000002			cib:4:AY913944	cea:9:LAUC01000234																	A	1
ECL20797	K88ab:7:AJ616239	astA:3:AB042005	gad:17:U00096	iha:14:AE005174	ltcA:10:EU113243				terC:8:CP006262	traT:73:AGTD01000004	capU:3:CP002729								hra:10:JF808724								fyuA:4:AHAX01000032	irp2:204:NZ_NBCK01000028					B
ECL20814	K88ab:6:CP002730	astA:3:AB042005	gad:17:U00096	iha:14:AE005174	ltcA:10:EU113243	sepA:2:AY604009	sta1:1:M25607	stb:1:AY028790	terC:8:CP006262	traT:56:CYCV01000028	capU:3:CP002729																						A	1
ECL20836	K88ab:6:CP002730	astA:3:AB042005	gad:17:U00096	iha:14:AE005174	ltcA:10:EU113243			stb:1:AY028790	terC:8:CP006262	traT:56:CYCV01000028	capU:3:CP002729	cia:1:APXL01000039			cib:2:HQ114281	cea:9:LAUC01000234																	A	1
ECL20846	K88ab:6:CP002730	astA:10:L11241	gad:17:U00096	iha:14:AE005174	ltcA:10:EU113243			stb:3:CP000913	terC:8:CP006262	traT:56:CYCV01000028	capU:3:CP002729																						A	1
ECL20850	K88ab:6:CP002730	astA:6:AY545598	gad:17:U00096	iha:14:AE005174	ltcA:10:EU113243	sepA:2:AY604009	sta1:1:M25607	stb:1:AY028790	terC:8:CP006262	traT:56:CYCV01000028	capU:3:CP002729					cea:9:LAUC01000234																	A	1
ECL20887	K88ab:6:CP002730	astA:10:L11241	gad:17:U00096	iha:14:AE005174		sepA:2:AY604009	sta1:1:M25607	stb:3:CP000913	terC:8:CP006262	traT:56:CYCV01000028	capU:3:CP002729	cia:3:AMTQ01000007			cib:4:AY913944																		A	1
ECL20896	K88ab:6:CP002730	astA:3:AB042005	gad:17:U00096	iha:14:AE005174	ltcA:10:EU113243	sepA:2:AY604009	sta1:1:M25607	stb:3:CP000913	terC:8:CP006262	traT:56:CYCV01000028	capU:3:CP002729																						A	11
ECL20906	K88ab:9:M25302	astA:3:AB042005	gad:17:U00096	iha:14:AE005174	ltcA:10:EU113243			stb:1:AY028790	terC:8:CP006262	traT:73:AGTD01000004	capU:3:CP002729						cba:14:FJ664743	cma:5:FJ664737															A	0
ECL20911	K88ab:6:CP002730	astA:3:AB042005	gad:17:U00096	iha:14:AE005174	ltcA:10:EU113243	sepA:2:AY604009	sta1:1:M25607	stb:1:AY028790	terC:8:CP006262	traT:56:CYCV01000028	capU:3:CP002729	cia:1:APXL01000039			cib:1:KP198616																		A	1
ECL20918	K88ab:6:CP002730	astA:3:AB042005	gad:17:U00096	iha:14:AE005174	ltcA:10:EU113243	sepA:2:AY604009	sta1:1:M25607	stb:3:CP000913	terC:8:CP006262	traT:56:CYCV01000028	capU:3:CP002729																						A	1
ECL20924	K88ab:6:CP002730	astA:3:AB042005	gad:17:U00096	iha:14:AE005174	ltcA:10:EU113243	sepA:2:AY604009	sta1:1:M25607	stb:3:CP000913	terC:8:CP006262	traT:56:CYCV01000028	capU:3:CP002729																						A	1
ECL21170	K88ab:6:CP002730	astA:3:AB042005	gad:15:AP009240		ltcA:10:EU113243	sepA:2:AY604009		stb:1:AY028790	terC:23:MG59169	traT:173:UEKA01000045									hra:4:CP028310		iss:8:CP001665						fyuA:13:CYAS01000050	irp2:218:NZ_NMBE01000050	lpfA:2:AE014073				F
ECL21259	K88ab:6:CP002730	astA:3:AB042005	gad:17:U00096	iha:14:AE005174	ltcA:10:EU113243	sepA:2:AY604009	sta1:1:M25607	stb:3:CP000913	terC:8:CP006262	traT:56:CYCV01000028	capU:3:CP002729	cia:1:APXL01000039			cib:1:KP198616																		A	1
ECL21274	K88ab:6:CP002730	astA:10:L11241	gad:27:U00096	iha:14:AE005174		sepA:2:AY604009		stb:3:CP000913	terC:8:CP006262	traT:56:CYCV01000028	capU:3:CP002729	cia:1:APXL01000039			cib:1:KP198616																		A	1
ECL21290	K88ab:6:CP002730	astA:3:AB042005	gad:17:U00096	iha:14:AE005174	ltcA:10:EU113243	sepA:2:AY604009	sta1:1:M25607	stb:3:CP000913	terC:8:CP006262	traT:56:CYCV01000028	capU:3:CP002729																						A	1
ECL21405	K88ab:6:CP002730	astA:3:AB042005	gad:17:U00096	iha:14:AE005174	ltcA:10:EU113243			stb:1:AY028790	terC:1:KU341381	traT:56:CYCV01000028	capU:3:CP002729																						A	1
ECL21412	K88ab:6:CP002730	astA:10:L11241	gad:17:U00096	iha:14:AE005174	ltcA:10:EU113243	sepA:2:AY604009	sta1:1:M25607	stb:3:CP000913	terC:8:CP006262	traT:56:CYCV01000028	capU:3:CP002729																						A	1
ECL21415	K88ab:6:CP002730	astA:10:L11241	gad:17:U00096	iha:14:AE005174		sepA:2:AY604009		stb:3:CP000913	terC:8:CP006262	traT:56:CYCV01000028	capU:3:CP002729								hra:10:JF808724														A	0
ECL21464	K88ab:6:CP002730		gad:17:U00096			sepA:2:AY604009	sta1:1:M25607	stb:3:CP000913	terC:5:CP007491	traT:13:NC_007675																	fyuA:4:AHAX01000032	irp2:253:NZ_NMFJ01000040			ehxA:4:X94129		C
ECL21483	K88ab:6:CP002730	astA:10:L11241	gad:17:U00096	iha:14:AE005174	ltcA:10:EU113243				terC:8:CP006262	traT:56:CYCV01000028	capU:3:CP002729					cea:9:LAUC01000234																	A	1
ECL21505	K88ab:6:CP002730	astA:3:AB042005	gad:17:U00096	iha:14:AE005174	ltcA:10:EU113243	sepA:2:AY604009	sta1:1:M25607	stb:3:CP000913	terC:8:CP006262	traT:56:CYCV01000028	capU:3:CP002729	cia:1:APXL01000039			cib:1:KP198616	cea:9:LAUC01000234																	A	1
ECL21512		astA:10:L11241	gad:27:U00096	iha:14:AE005174	ltcA:10:EU113243	sepA:2:AY604009	sta1:1:M25607	stb:3:CP000913	terC:8:CP006262	traT:56:CYCV01000028	capU:3:CP002729																						A	1
ECL21518	K88ab:6:CP002730	astA:3:AB042005	gad:17:U00096	iha:14:AE005174	ltcA:10:EU113243	sepA:2:AY604009	sta1:1:M25607	stb:3:CP000913	terC:8:CP006262	traT:56:CYCV01000028	capU:3:CP002729																						A	11
ECL21541		astA:3:AB042005	gad:17:U00096	iha:14:AE005174	ltcA:10:EU113243	sepA:2:AY604009	sta1:1:M25607	stb:3:CP000913	terC:8:CP006262	traT:56:CYCV01000028	capU:3:CP002729																						A	1
ECL21542		astA:3:AB042005	gad:17:U00096	iha:14:AE005174				stb:3:CP000913	terC:8:CP006262	traT:61:AKKX01000148	capU:3:CP002729																						A	1
ECL21551	K88ab:6:CP002730	astA:3:AB042005	gad:27:U00096	iha:14:AE005174		sepA:2:AY604009	sta1:1:M25607	stb:3:CP000913	terC:8:CP006262	traT:56:CYCV01000028	capU:3:CP002729	cia:19:UDDL01000017			cib:4:AY913944																		A	1
ECL21584	K88ab:7:AJ616239	astA:3:AB042005	gad:17:U00096	iha:14:AE005174	ltcA:10:EU113243			stb:1:AY028790	terC:8:CP006262	traT:11:CP000796	capU:3:CP002729	cia:1:APXL01000039			cib:1:KP198616		cba:14:FJ664743	cma:5:FJ664737			iss:6:CP001846												A	4
ECL21628	K88ab:6:CP002730	astA:3:AB042005	gad:17:U00096	iha:14:AE005174	ltcA:10:EU113243	sepA:2:AY604009	sta1:1:M25607	stb:3:CP000913	terC:8:CP006262	traT:56:CYCV01000028	capU:3:CP002729																						A	1
ECL21652	K88ab:6:CP002730	astA:3:AB042005	gad:27:U00096	iha:14:AE005174	ltcA:10:EU113243	sepA:2:AY604009		stb:1:AY028790	terC:8:CP006262	traT:56:CYCV01000028	capU:3:CP002729																						A	1
ECL21655	K88ab:6:CP002730	astA:6:AY545598	gad:17:U00096	iha:14:AE005174	ltcA:10:EU113243			stb:1:AY028790	terC:8:CP006262	traT:56:CYCV01000028	capU:3:CP002729					cea:9:LAUC01000234																	A	1
ECL21657	K88ab:6:CP002730	astA:6:AY545598	gad:17:U00096	iha:14:AE005174	ltcA:10:EU113243	sepA:2:AY604009		stb:1:AY028790	terC:8:CP006262	traT:56:CYCV01000028	capU:3:CP002729																						A	1
ECL21676	K88ab:6:CP002730	astA:3:AB042005	gad:27:U00096	iha:14:AE005174	ltcA:10:EU113243	sepA:2:AY604009	sta1:1:M25607	stb:1:AY028790	terC:8:CP006262	traT:56:CYCV01000028	capU:3:CP002729																						A	1
ECL21680	K88ab:6:CP002730	astA:3:AB042005	gad:17:U00096	iha:14:AE005174	ltcA:10:EU113243	sepA:2:AY604009		stb:3:CP000913	terC:8:CP006262	traT:61:AKKX01000148	capU:3:CP002729																						A	1
ECL21730	K88ab:6:CP002730	astA:10:L11241	gad:17:U00096	iha:14:AE005174		sepA:2:AY604009	sta1:1:M25607	stb:3:CP000913	terC:8:CP006262	traT:56:CYCV01000028	capU:3:CP002729																						A	1
ECL21732						sepA:2:AY604009	sta1:1:M25607	stb:3:CP000913	terC:5:CP007491	traT:13:NC_007675																	fyuA:4:AHAX01000032	irp2:253:NZ_NMFJ01000040			ehxA:4:X94129		C
ECL21756	K88ab:7:AJ616239	astA:3:AB042005	gad:17:U00096	iha:14:AE005174	ltcA:10:EU113243			stb:1:AY028790	terC:8:CP006262	traT:73:AGTD01000004	capU:3:CP002729								hra:10:JF808724								fyuA:4:AHAX01000032	irp2:204:NZ_NBCK01000028					B
ECL21837	K88ab:6:CP002730	astA:3:AB042005	gad:27:U00096	iha:14:AE005174	ltcA:10:EU113243	sepA:2:AY604009	sta1:1:M25607	stb:1:AY028790	terC:8:CP006262	traT:56:CYCV01000028	capU:3:CP002729																						A	1
ECL21975	K88ab:9:M25302	astA:3:AB042005	gad:31:CP002967	iha:14:AE005174	ltcA:10:EU113243				terC:8:CP006262	traT:61:AKKX01000148	capU:3:CP002729																						A	0
ECL21979	K88ab:6:CP002730	astA:10:L11241	gad:17:U00096	iha:14:AE005174		sepA:2:AY604009		stb:3:CP000913	terC:8:CP006262	traT:56:CYCV01000028	capU:3:CP002729																						A	1
ECL22052	K88ab:6:CP002730	astA:10:L11241	gad:17:U00096	iha:14:AE005174		sepA:2:AY604009	sta1:1:M25607	stb:3:CP000913	terC:8:CP006262	traT:56:CYCV01000028	capU:3:CP002729	cia:19:UDDL01000017			cib:4:AY913944	cea:9:LAUC01000234																	A	1
ECL22093	K88ab:6:CP002730	astA:10:L11241	gad:17:U00096	iha:14:AE005174	ltcA:10:EU113243	sepA:2:AY604009	sta1:1:M25607	stb:1:AY028790	terC:8:CP006262	traT:56:CYCV01000028	capU:3:CP002729																						A	1
ECL22099	K88ab:6:CP002730	astA:10:L11241	gad:17:U00096	iha:14:AE005174	ltcA:10:EU113243			stb:1:AY028790	terC:8:CP006262	traT:56:CYCV01000028	capU:3:CP002729																						A	1
ECL22128	K88ab:6:CP002730	astA:3:AB042005	gad:17:U00096	iha:14:AE005174	ltcA:10:EU113243	sepA:2:AY604009	sta1:1:M25607	stb:3:CP000913	terC:8:CP006262	traT:56:CYCV01000028	capU:3:CP002729	cia:1:APXL01000039			cib:1:KP198616																		A	1
ECL22134	K88ab:6:CP002730	astA:3:AB042005	gad:17:U00096	iha:14:AE005174	ltcA:10:EU113243	sepA:2:AY604009	sta1:1:M25607	stb:3:CP000913	terC:8:CP006262	traT:56:CYCV01000028	capU:3:CP002729																						A	11
ECL22146	K88ab:6:CP002730		gad:17:U00096			sepA:2:AY604009	sta1:1:M25607	stb:3:CP000913	terC:5:CP007491	traT:13:NC_007675		cia:1:APXL01000039			cib:1:KP198616												fyuA:4:AHAX01000032	irp2:253:NZ_NMFJ01000040			ehxA:4:X94129		C
ECL22172	K88ab:6:CP002730					sepA:2:AY604009	sta1:1:M25607	stb:3:CP000913	terC:5:CP007491	traT:13:NC_007675																	fyuA:4:AHAX01000032	irp2:253:NZ_NMFJ01000040			ehxA:4:X94129		C
ECL22215	K88ab:6:CP002730	astA:10:L11241	gad:17:U00096	iha:14:AE005174	ltcA:10:EU113243				terC:8:CP006262	traT:131:NZ_QXIP01000066	capU:3:CP002729	cia:36:QMGM01000002																					A	1
ECL22265	K88ab:6:CP002730	astA:10:L11241	gad:17:U00096	iha:14:AE005174	ltcA:10:EU113243			stb:1:AY028790	terC:23:MG59169	traT:61:AKKX01000148	capU:3:CP002729																						A	1
ECL22274	K88ab:6:CP002730	astA:3:AB042005	gad:17:U00096	iha:14:AE005174	ltcA:10:EU113243	sepA:2:AY604009	sta1:1:M25607	stb:3:CP000913	terC:8:CP006262	traT:56:CYCV01000028	capU:3:CP002729																						A	1
ECL22293	K88ab:6:CP002730	astA:10:L11241	gad:17:U00096	iha:14:AE005174	ltcA:10:EU113243	sepA:2:AY604009	sta1:1:M25607	stb:1:AY028790	terC:8:CP006262	traT:56:CYCV01000028	capU:3:CP002729																						A	1
ECL22298	K88ab:6:CP002730	astA:3:AB042005	gad:17:U00096	iha:14:AE005174	ltcA:10:EU113243	sepA:2:AY604009		stb:1:AY028790	terC:8:CP006262	traT:56:CYCV01000028	capU:3:CP002729																						A	1
ECL22341	K88ab:7:AJ616239	astA:10:L11241	gad:17:U00096	iha:14:AE005174	ltcA:10:EU113243				terC:8:CP006262	traT:73:AGTD01000004	capU:3:CP002729								hra:10:JF808724								fyuA:4:AHAX01000032	irp2:204:NZ_NBCK01000028					B
ECL22433	K88ab:6:CP002730	astA:10:L11241	gad:17:U00096	iha:14:AE005174	ltcA:10:EU113243				terC:23:MG59169	traT:61:AKKX01000148	capU:3:CP002729																						A	1
ECL22438	K88ab:6:CP002730	astA:3:AB042005	gad:17:U00096	iha:14:AE005174	ltcA:10:EU113243			stb:1:AY028790	terC:8:CP006262	traT:56:CYCV01000028	capU:3:CP002729																						A	1
ECL22447	K88ab:6:CP002730	astA:3:AB042005	gad:17:U00096	iha:14:AE005174	ltcA:10:EU113243	sepA:2:AY604009	sta1:1:M25607	stb:1:AY028790	terC:8:CP006262	traT:56:CYCV01000028	capU:3:CP002729	cia:1:APXL01000039			cib:1:KP198616																		A	1
ECL22487	K88ab:7:AJ616239	astA:3:AB042005	gad:17:U00096	iha:14:AE005174	ltcA:10:EU113243	sepA:2:AY604009		stb:1:AY028790	terC:8:CP006262	traT:11:CP000796	capU:3:CP002729	cia:1:APXL01000039			cib:1:KP198616		cba:14:FJ664743	cma:5:FJ664737			iss:6:CP001846												A	4
ECL22491	K88ab:6:CP002730	astA:3:AB042005	gad:17:U00096	iha:14:AE005174		sepA:2:AY604009		stb:3:CP000913	terC:8:CP006262	traT:56:CYCV01000028	capU:3:CP002729																						A	1
ECL22503	K88ab:6:CP002730	astA:10:L11241	gad:17:U00096	iha:14:AE005174		sepA:2:AY604009	sta1:1:M25607	stb:3:CP000913	terC:8:CP006262	traT:56:CYCV01000028	capU:3:CP002729																						A	1
ECL22505	K88ab:6:CP002730	astA:6:AY545598	gad:17:U00096	iha:14:AE005174	ltcA:10:EU113243	sepA:2:AY604009	sta1:1:M25607	stb:3:CP000913	terC:8:CP006262	traT:56:CYCV01000028	capU:3:CP002729																						A	1
ECL22529	K88ab:7:AJ616239	astA:3:AB042005		iha:14:AE005174	ltcA:10:EU113243			stb:1:AY028790	terC:8:CP006262	traT:73:AGTD01000004	capU:3:CP002729						cba:6:FJ664720		hra:10:JF808724								fyuA:4:AHAX01000032	irp2:204:NZ_NBCK01000028					B
ECL22536	K88ab:6:CP002730	astA:3:AB042005	gad:17:U00096	iha:14:AE005174	ltcA:10:EU113243	sepA:2:AY604009		stb:1:AY028790	terC:8:CP006262	traT:56:CYCV01000028	capU:3:CP002729																						A	11
ECL22553	K88ab:6:CP002730	astA:10:L11241	gad:17:U00096	iha:14:AE005174	ltcA:10:EU113243			stb:1:AY028790	terC:8:CP006262	traT:56:CYCV01000028	capU:3:CP002729																						A	1
ECL22653	K88ab:7:AJ616239	astA:10:L11241	gad:17:U00096	iha:14:AE005174	ltcA:10:EU113243				terC:8:CP006262	traT:73:AGTD01000004	capU:3:CP002729						cba:6:FJ664720	cma:16:FJ66472	hra:10:JF808724								fyuA:4:AHAX01000032	irp2:204:NZ_NBCK01000028					B
ECL22730			gad:17:U00096			sepA:2:AY604009	sta1:1:M25607	stb:3:CP000913	terC:5:CP007491	traT:13:NC_007675																	fyuA:4:AHAX01000032	irp2:253:NZ_NMFJ01000040			ehxA:4:X94129		C
ECL22741	K88ab:6:CP002730	astA:3:AB042005	gad:17:U00096	iha:14:AE005174	ltcA:10:EU113243			stb:1:AY028790	terC:8:CP006262	traT:56:CYCV01000028	capU:3:CP002729	cia:1:APXL01000039			cib:1:KP198616																		A	2
ECL22749	K88ab:6:CP002730		gad:17:U00096			sepA:2:AY604009	sta1:1:M25607	stb:3:CP000913	terC:5:CP007491	traT:13:NC_007675		cia:1:APXL01000039			cib:1:KP198616												fyuA:4:AHAX01000032	irp2:253:NZ_NMFJ01000040					C
ECL22774	K88ab:9:M25302	astA:3:AB042005	gad:17:U00096		ltcA:10:EU113243			stb:1:AY028790	terC:23:MG59169	traT:73:AGTD01000004		cia:1:APXL01000039			cib:2:HQ114281	cea:9:LAUC01000234	cba:14:FJ664743	cma:5:FJ664737			iss:8:CP001665						fyuA:4:AHAX01000032	irp2:204:NZ_NBCK01000028	lpfA:2:AE014073				E
ECL22800	K88ab:6:CP002730	astA:3:AB042005	gad:17:U00096	iha:14:AE005174	ltcA:10:EU113243			stb:1:AY028790	terC:8:CP006262	traT:56:CYCV01000028	capU:3:CP002729																						A	1
ECL22867	K88ab:6:CP002730	astA:10:L11241	gad:17:U00096	iha:14:AE005174	ltcA:10:EU113243	sepA:2:AY604009		stb:1:AY028790	terC:8:CP006262	traT:56:CYCV01000028	capU:3:CP002729																						A	11
ECL22868	K88ab:6:CP002730	astA:3:AB042005	gad:17:U00096	iha:14:AE005174	ltcA:10:EU113243	sepA:2:AY604009	sta1:1:M25607	stb:1:AY028790	terC:8:CP006262	traT:56:CYCV01000028	capU:3:CP002729																						A	11
ECL22882	K88ab:6:CP002730		gad:17:U00096			sepA:2:AY604009	sta1:1:M25607	stb:3:CP000913	terC:5:CP007491	traT:13:NC_007675																	fyuA:4:AHAX01000032	irp2:253:NZ_NMFJ01000040			ehxA:4:X94129		C
ECL22887	K88ab:6:CP002730	astA:6:AY545598	gad:17:U00096	iha:14:AE005174	ltcA:10:EU113243				terC:8:CP006262	traT:56:CYCV01000028	capU:3:CP002729	cia:36:QMGM01000002																					A	1
ECL22967	K88ab:6:CP002730	astA:6:AY545598	gad:27:U00096	iha:14:AE005174	ltcA:10:EU113243	sepA:2:AY604009	sta1:1:M25607	stb:1:AY028790	terC:8:CP006262	traT:56:CYCV01000028	capU:3:CP002729																						A	1
ECL23013	K88ab:6:CP002730	astA:10:L11241	gad:17:U00096	iha:14:AE005174	ltcA:10:EU113243	sepA:2:AY604009		stb:3:CP000913	terC:8:CP006262	traT:56:CYCV01000028	capU:3:CP002729	cia:1:APXL01000039			cib:1:KP198616				hra:4:CP028310			mchB:2:AJ009631	mchC:4:FN554766	mchF:8:FN554766	mcmA:4:AJ586887								A	1
ECL23067	K88ab:6:CP002730	astA:3:AB042005	gad:17:U00096	iha:14:AE005174	ltcA:10:EU113243			stb:1:AY028790	terC:8:CP006262	traT:56:CYCV01000028	capU:3:CP002729																						A	1
ECL85531	K88ab:6:CP002730	astA:3:AB042005	gad:27:U00096	iha:14:AE005174	ltcA:10:EU113243	sepA:2:AY604009	sta1:1:M25607	stb:1:AY028790	terC:8:CP006262	traT:56:CYCV01000028	capU:3:CP002729																						A	2
SRR11045320	K88ab:6:CP002730	astA:3:AB042005		iha:14:AE005174	ltcA:10:EU113243	sepA:2:AY604009	sta1:1:M25607	stb:1:AY028790	terC:8:CP006262	traT:56:CYCV01000028	capU:3:CP002729	cia:36:QMGM01000002																					A
SRR11045323	K88ab:6:CP002730	astA:3:AB042005	gad:17:U00096	iha:14:AE005174	ltcA:10:EU113243	sepA:2:AY604009	sta1:1:M25607	stb:3:CP000913	terC:8:CP006262	traT:56:CYCV01000028	capU:3:CP002729																						A
SRR11045324	K88ab:6:CP002730	astA:3:AB042005	gad:31:CP002967	iha:14:AE005174	ltcA:10:EU113243	sepA:2:AY604009	sta1:1:M25607	stb:3:CP000913	terC:8:CP006262	traT:61:AKKX01000148	capU:3:CP002729																						A
SRR11046294	K88ab:6:CP002730	astA:3:AB042005	gad:17:U00096	iha:14:AE005174	ltcA:10:EU113243	sepA:2:AY604009	sta1:1:M25607	stb:3:CP000913	terC:8:CP006262	traT:61:AKKX01000148	capU:3:CP002729																						A
SRR11046297	K88ab:6:CP002730	astA:3:AB042005	gad:17:U00096	iha:14:AE005174	ltcA:10:EU113243	sepA:2:AY604009	sta1:1:M25607	stb:1:AY028790	terC:8:CP006262	traT:56:CYCV01000028	capU:3:CP002729																						A
SRR11046300	K88ab:6:CP002730	astA:3:AB042005	gad:17:U00096	iha:14:AE005174	ltcA:10:EU113243	sepA:2:AY604009	sta1:1:M25607	stb:3:CP000913	terC:8:CP006262	traT:56:CYCV01000028	capU:3:CP002729																						A
SRR11046301	K88ab:6:CP002730	astA:3:AB042005	gad:31:CP002967	iha:14:AE005174	ltcA:10:EU113243	sepA:2:AY604009	sta1:1:M25607	stb:1:AY028790	terC:8:CP006262	traT:56:CYCV01000028	capU:3:CP002729																						A
SRR11046303	K88ab:6:CP002730	astA:3:AB042005	gad:17:U00096	iha:14:AE005174	ltcA:10:EU113243			stb:1:AY028790	terC:8:CP006262	traT:131:NZ_QXIP01000066	capU:3:CP002729																						A
SRR11046874	K88ab:6:CP002730	astA:3:AB042005	gad:31:CP002967	iha:14:AE005174	ltcA:10:EU113243			stb:1:AY028790	terC:8:CP006262	traT:56:CYCV01000028	capU:3:CP002729																						A
SRR11046875	K88ab:6:CP002730	astA:3:AB042005	gad:17:U00096	iha:14:AE005174	ltcA:10:EU113243	sepA:2:AY604009	sta1:1:M25607	stb:1:AY028790	terC:8:CP006262	traT:56:CYCV01000028	capU:3:CP002729																						A
SRR11046877	K88ab:6:CP002730	astA:3:AB042005	gad:31:CP002967	iha:14:AE005174	ltcA:10:EU113243	sepA:2:AY604009	sta1:1:M25607	stb:3:CP000913	terC:8:CP006262	traT:56:CYCV01000028	capU:3:CP002729																						A
SRR11046878	K88ab:6:CP002730	astA:3:AB042005	gad:17:U00096	iha:14:AE005174	ltcA:10:EU113243			stb:1:AY028790	terC:8:CP006262	traT:56:CYCV01000028	capU:3:CP002729																						A
SRR11047446	K88ab:7:AJ616239	astA:3:AB042005	gad:31:CP002967	iha:14:AE005174	ltcA:10:EU113243			stb:1:AY028790	terC:8:CP006262	traT:56:CYCV01000028	capU:3:CP002729		ireA:1:CU928162	papC:37:CP026853																			A
SRR11048585	K88ab:6:CP002730	astA:10:L11241		iha:14:AE005174	ltcA:10:EU113243	sepA:2:AY604009	sta1:1:M25607	stb:1:AY028790	terC:8:CP006262	traT:56:CYCV01000028	capU:3:CP002729																						A
SRR11048588	K88ab:6:CP002730	astA:10:L11241		iha:14:AE005174				stb:3:CP000913	terC:8:CP006262	traT:56:CYCV01000028	capU:3:CP002729																						A
SRR11048592	K88ab:7:AJ616239	astA:3:AB042005	gad:17:U00096	iha:14:AE005174	ltcA:10:EU113243			stb:1:AY028790	terC:8:CP006262	traT:61:AKKX01000148	capU:3:CP002729																						A
SRR11048595	K88ab:6:CP002730	astA:3:AB042005		iha:14:AE005174	ltcA:10:EU113243	sepA:2:AY604009	sta1:1:M25607	stb:3:CP000913	terC:8:CP006262	traT:56:CYCV01000028	capU:3:CP002729																						A
SRR11048596	K88ab:6:CP002730		gad:17:U00096	iha:14:AE005174		sepA:2:AY604009	sta1:1:M25607	stb:1:AY028790	terC:8:CP006262	traT:56:CYCV01000028	capU:3:CP002729																						A
SRR11074150	K88ab:6:CP002730	astA:3:AB042005	gad:17:U00096	iha:14:AE005174	ltcA:10:EU113243	sepA:2:AY604009	sta1:1:M25607	stb:1:AY028790	terC:8:CP006262	traT:56:CYCV01000028	capU:3:CP002729																						A
SRR11074152	K88ab:6:CP002730	astA:3:AB042005	gad:17:U00096	iha:14:AE005174	ltcA:10:EU113243			stb:1:AY028790	terC:8:CP006262	traT:61:AKKX01000148	capU:3:CP002729																						A
SRR11074153	K88ab:6:CP002730	astA:3:AB042005	gad:17:U00096	iha:14:AE005174	ltcA:10:EU113243	sepA:2:AY604009	sta1:1:M25607	stb:1:AY028790	terC:8:CP006262	traT:56:CYCV01000028	capU:3:CP002729	cia:21:UDBB01000022			cib:4:AY913944																		A
SRR11074174	K88ab:6:CP002730	astA:3:AB042005	gad:17:U00096	iha:14:AE005174	ltcA:10:EU113243	sepA:2:AY604009	sta1:1:M25607	stb:1:AY028790	terC:8:CP006262	traT:56:CYCV01000028	capU:3:CP002729																						A
SRR11074676	K88ab:6:CP002730	astA:3:AB042005	gad:17:U00096	iha:14:AE005174	ltcA:10:EU113243	sepA:2:AY604009	sta1:1:M25607	stb:1:AY028790	terC:8:CP006262	traT:56:CYCV01000028	capU:3:CP002729																						A
SRR11074677	K88ab:6:CP002730	astA:3:AB042005	gad:17:U00096	iha:14:AE005174	ltcA:10:EU113243	sepA:2:AY604009	sta1:1:M25607	stb:1:AY028790	terC:8:CP006262	traT:56:CYCV01000028	capU:3:CP002729																						A
SRR11074679	K88ab:6:CP002730	astA:3:AB042005	gad:17:U00096	iha:14:AE005174	ltcA:10:EU113243	sepA:2:AY604009	sta1:1:M25607	stb:1:AY028790	terC:8:CP006262	traT:56:CYCV01000028	capU:3:CP002729																						A
SRR11074680	K88ab:6:CP002730	astA:3:AB042005	gad:17:U00096	iha:14:AE005174	ltcA:10:EU113243	sepA:2:AY604009	sta1:1:M25607	stb:1:AY028790	terC:8:CP006262	traT:56:CYCV01000028	capU:3:CP002729																						A
SRR11074681	K88ab:6:CP002730	astA:3:AB042005	gad:17:U00096	iha:14:AE005174	ltcA:10:EU113243			stb:1:AY028790	terC:8:CP006262	traT:39:CYGN01000138	capU:3:CP002729																						A
SRR11074684	K88ab:6:CP002730	astA:3:AB042005	gad:17:U00096	iha:14:AE005174	ltcA:10:EU113243			stb:1:AY028790	terC:8:CP006262	traT:56:CYCV01000028	capU:3:CP002729																						A
SRR11074686	K88ab:6:CP002730	astA:3:AB042005	gad:17:U00096	iha:14:AE005174	ltcA:10:EU113243	sepA:2:AY604009	sta1:1:M25607	stb:1:AY028790	terC:8:CP006262	traT:56:CYCV01000028	capU:3:CP002729																						A
SRR11074688	K88ab:6:CP002730	astA:3:AB042005	gad:17:U00096	iha:14:AE005174	ltcA:10:EU113243	sepA:2:AY604009	sta1:1:M25607	stb:1:AY028790	terC:8:CP006262	traT:56:CYCV01000028	capU:3:CP002729																						A
SRR11074697	K88ab:6:CP002730	astA:10:L11241	gad:17:U00096	iha:14:AE005174					terC:8:CP006262	traT:61:AKKX01000148	capU:3:CP002729	cia:19:UDDL01000017			cib:4:AY913944																		A
SRR11074704	K88ab:6:CP002730	astA:3:AB042005	gad:17:U00096	iha:14:AE005174	ltcA:10:EU113243			stb:1:AY028790	terC:8:CP006262	traT:56:CYCV01000028	capU:3:CP002729																						A
SRR11074708	K88ab:6:CP002730	astA:3:AB042005	gad:17:U00096	iha:14:AE005174	ltcA:10:EU113243			stb:1:AY028790	terC:8:CP006262	traT:56:CYCV01000028	capU:3:CP002729																						A
SRR11074710	K88ab:6:CP002730	astA:3:AB042005	gad:17:U00096	iha:14:AE005174	ltcA:10:EU113243	sepA:2:AY604009	sta1:1:M25607	stb:1:AY028790	terC:8:CP006262	traT:56:CYCV01000028	capU:3:CP002729																						A
SRR11074716	K88ab:6:CP002730	astA:10:L11241	gad:17:U00096	iha:14:AE005174		sepA:2:AY604009	sta1:1:M25607	stb:3:CP000913	terC:8:CP006262	traT:56:CYCV01000028	capU:3:CP002729																						A
SRR6121969	K88ab:6:CP002730	astA:10:L11241	gad:17:U00096	iha:14:AE005174		sepA:2:AY604009	sta1:1:M25607		terC:8:CP006262	traT:56:CYCV01000028	capU:3:CP002729																						A
SRR7213569	K88ab:6:CP002730	astA:10:L11241		iha:14:AE005174	ltcA:10:EU113243	sepA:2:AY604009	sta1:1:M25607	stb:3:CP000913	terC:8:CP006262	traT:56:CYCV01000028	capU:3:CP002729																						A
SRR7213570	K88ab:6:CP002730	astA:3:AB042005		iha:14:AE005174	ltcA:10:EU113243	sepA:2:AY604009	sta1:1:M25607	stb:3:CP000913	terC:8:CP006262	traT:56:CYCV01000028	capU:3:CP002729																						A
SRR7213571	K88ab:6:CP002730	astA:6:AY545598	gad:31:CP002967	iha:14:AE005174	ltcA:10:EU113243			stb:1:AY028790	terC:8:CP006262	traT:61:AKKX01000148		cia:1:APXL01000039			cib:2:HQ114281	cea:9:LAUC01000234																	A
SRR7213572	K88ab:9:M25302	astA:6:AY545598		iha:14:AE005174	ltcA:10:EU113243			stb:1:AY028790	terC:8:CP006262	traT:73:AGTD01000004	capU:3:CP002729						cba:14:FJ664743	cma:5:FJ664737	hra:10:JF808724														A
SRR7213573	K88ab:6:CP002730	astA:3:AB042005		iha:14:AE005174	ltcA:10:EU113243	sepA:2:AY604009	sta1:1:M25607	stb:3:CP000913	terC:8:CP006262	traT:56:CYCV01000028	capU:3:CP002729																						A
SRR7213575	K88ab:6:CP002730	astA:6:AY545598		iha:14:AE005174	ltcA:10:EU113243	sepA:2:AY604009	sta1:1:M25607	stb:3:CP000913	terC:8:CP006262	traT:56:CYCV01000028	capU:3:CP002729																						A
SRR7213576	K88ab:6:CP002730	astA:3:AB042005		iha:14:AE005174	ltcA:10:EU113243	sepA:2:AY604009	sta1:1:M25607	stb:1:AY028790	terC:8:CP006262	traT:56:CYCV01000028	capU:3:CP002729																						A
SRR7213578	K88ab:6:CP002730	astA:3:AB042005		iha:14:AE005174	ltcA:10:EU113243	sepA:2:AY604009	sta1:1:M25607	stb:3:CP000913	terC:8:CP006262	traT:56:CYCV01000028	capU:3:CP002729																						A
SRR7213579	K88ab:6:CP002730	astA:3:AB042005		iha:14:AE005174	ltcA:10:EU113243			stb:1:AY028790	terC:8:CP006262	traT:56:CYCV01000028	capU:3:CP002729																						A
SRR7213581	K88ab:6:CP002730	astA:3:AB042005		iha:14:AE005174	ltcA:10:EU113243	sepA:2:AY604009	sta1:1:M25607		terC:8:CP006262	traT:56:CYCV01000028	capU:3:CP002729	cia:19:UDDL01000017			cib:4:AY913944																		A
SRR7213583	K88ab:6:CP002730	astA:10:L11241		iha:14:AE005174	ltcA:10:EU113243	sepA:2:AY604009	sta1:1:M25607	stb:1:AY028790	terC:8:CP006262	traT:56:CYCV01000028	capU:3:CP002729																						A
SRR7213588	K88ab:6:CP002730	astA:3:AB042005		iha:14:AE005174	ltcA:10:EU113243	sepA:2:AY604009	sta1:1:M25607	stb:3:CP000913	terC:8:CP006262	traT:56:CYCV01000028	capU:3:CP002729																						A
SRR7213590	K88ab:6:CP002730	astA:3:AB042005		iha:14:AE005174	ltcA:10:EU113243	sepA:2:AY604009	sta1:1:M25607	stb:1:AY028790	terC:8:CP006262	traT:56:CYCV01000028	capU:3:CP002729																						A
SRR7213593	K88ab:6:CP002730	astA:3:AB042005		iha:14:AE005174	ltcA:10:EU113243	sepA:2:AY604009	sta1:1:M25607	stb:1:AY028790	terC:8:CP006262	traT:56:CYCV01000028																							A
SRR7213595	K88ab:6:CP002730	astA:3:AB042005		iha:14:AE005174	ltcA:10:EU113243	sepA:2:AY604009	sta1:1:M25607		terC:8:CP006262	traT:56:CYCV01000028	capU:3:CP002729																						A
SRR7213596	K88ab:6:CP002730	astA:3:AB042005		iha:14:AE005174	ltcA:10:EU113243	sepA:2:AY604009	sta1:1:M25607	stb:1:AY028790	terC:8:CP006262	traT:56:CYCV01000028																							A
SRR7213597	K88ab:6:CP002730	astA:6:AY545598		iha:14:AE005174	ltcA:10:EU113243	sepA:2:AY604009	sta1:1:M25607	stb:1:AY028790	terC:8:CP006262	traT:56:CYCV01000028	capU:3:CP002729																						A
SRR7213598	K88ab:6:CP002730	astA:3:AB042005		iha:14:AE005174	ltcA:10:EU113243	sepA:2:AY604009	sta1:1:M25607	stb:3:CP000913	terC:8:CP006262	traT:56:CYCV01000028	capU:3:CP002729																						A
SRR7213599	K88ab:6:CP002730	astA:3:AB042005		iha:14:AE005174	ltcA:10:EU113243			stb:1:AY028790	terC:8:CP006262	traT:143:UDCW01000026	capU:3:CP002729																						A
SRR7213600	K88ab:6:CP002730	astA:3:AB042005		iha:14:AE005174	ltcA:10:EU113243	sepA:2:AY604009	sta1:1:M25607	stb:3:CP000913	terC:8:CP006262	traT:56:CYCV01000028	capU:3:CP002729																						A
SRR7213602	K88ab:6:CP002730	astA:3:AB042005		iha:14:AE005174	ltcA:10:EU113243	sepA:2:AY604009	sta1:1:M25607	stb:1:AY028790	terC:8:CP006262	traT:56:CYCV01000028	capU:3:CP002729																						A
SRR7213603	K88ab:6:CP002730	astA:3:AB042005		iha:14:AE005174	ltcA:10:EU113243			stb:1:AY028790	terC:8:CP006262	traT:56:CYCV01000028	capU:3:CP002729																						A
SRR7213606	K88ab:6:CP002730	astA:3:AB042005		iha:14:AE005174	ltcA:10:EU113243	sepA:2:AY604009	sta1:1:M25607	stb:1:AY028790	terC:8:CP006262	traT:56:CYCV01000028																							A
SRR7213607	K88ab:6:CP002730	astA:6:AY545598		iha:14:AE005174	ltcA:10:EU113243	sepA:2:AY604009	sta1:1:M25607	stb:1:AY028790	terC:8:CP006262	traT:56:CYCV01000028	capU:3:CP002729																						A
SRR7213608	K88ab:6:CP002730	astA:6:AY545598		iha:14:AE005174	ltcA:10:EU113243	sepA:2:AY604009	sta1:1:M25607	stb:3:CP000913	terC:8:CP006262	traT:56:CYCV01000028	capU:3:CP002729																						A
SRR7213623	K88ab:6:CP002730	astA:3:AB042005		iha:14:AE005174	ltcA:10:EU113243	sepA:2:AY604009	sta1:1:M25607	stb:3:CP000913	terC:8:CP006262	traT:56:CYCV01000028	capU:3:CP002729																						A
SRR7213658	K88ab:6:CP002730	astA:3:AB042005		iha:14:AE005174	ltcA:10:EU113243	sepA:2:AY604009	sta1:1:M25607	stb:1:AY028790	terC:8:CP006262	traT:56:CYCV01000028	capU:3:CP002729																						A
SRR7213659	K88ab:6:CP002730	astA:10:L11241		iha:14:AE005174	ltcA:10:EU113243	sepA:2:AY604009	sta1:1:M25607	stb:3:CP000913	terC:8:CP006262	traT:56:CYCV01000028	capU:3:CP002729																						A
SRR7213660	K88ab:6:CP002730	astA:6:AY545598		iha:14:AE005174	ltcA:10:EU113243			stb:1:AY028790	terC:8:CP006262	traT:56:CYCV01000028	capU:3:CP002729																						A
SRR8157048	K88ab:9:M25302	astA:3:AB042005	gad:27:U00096	iha:14:AE005174	ltcA:10:EU113243			stb:1:AY028790	terC:8:CP006262	traT:73:AGTD01000004	capU:3:CP002729						cba:14:FJ664743	cma:5:FJ664737	hra:10:JF808724														A
SRR8901382	K88ab:6:CP002730	astA:6:AY545598		iha:14:AE005174	ltcA:10:EU113243	sepA:2:AY604009	sta1:1:M25607	stb:1:AY028790	terC:8:CP006262	traT:56:CYCV01000028	capU:3:CP002729																						A
SRR8901386	K88ab:6:CP002730	astA:6:AY545598		iha:14:AE005174	ltcA:10:EU113243	sepA:2:AY604009	sta1:1:M25607	stb:3:CP000913	terC:8:CP006262	traT:56:CYCV01000028	capU:3:CP002729																						A
SRR8901388		astA:3:AB042005		iha:14:AE005174	ltcA:10:EU113243	sepA:2:AY604009		stb:1:AY028790	terC:8:CP006262	traT:73:AGTD01000004	capU:3:CP002729																						A
SRR8901392	K88ab:6:CP002730	astA:10:L11241		iha:14:AE005174	ltcA:10:EU113243	sepA:2:AY604009	sta1:1:M25607	stb:1:AY028790	terC:8:CP006262	traT:56:CYCV01000028	capU:3:CP002729																						A
SRR8901396	K88ab:6:CP002730	astA:6:AY545598		iha:14:AE005174	ltcA:10:EU113243			stb:1:AY028790	terC:8:CP006262	traT:56:CYCV01000028																							A
SRR8901397	K88ab:6:CP002730	astA:3:AB042005		iha:14:AE005174	ltcA:10:EU113243	sepA:2:AY604009	sta1:1:M25607		terC:8:CP006262	traT:56:CYCV01000028	capU:3:CP002729																						A
SRR8901398	K88ab:6:CP002730	astA:10:L11241	gad:27:U00096	iha:14:AE005174	ltcA:10:EU113243	sepA:2:AY604009	sta1:1:M25607	stb:3:CP000913	terC:20:UGER010	traT:56:CYCV01000028	capU:3:CP002729									etsC:12:KU664810													A
SRR8901402	K88ab:6:CP002730	astA:3:AB042005		iha:14:AE005174	ltcA:10:EU113243	sepA:2:AY604009	sta1:1:M25607	stb:3:CP000913	terC:8:CP006262	traT:56:CYCV01000028	capU:3:CP002729																						A
SRR8901404	K88ab:6:CP002730	astA:6:AY545598	gad:27:U00096	iha:14:AE005174	ltcA:10:EU113243	sepA:2:AY604009	sta1:1:M25607	stb:3:CP000913	terC:8:CP006262	traT:56:CYCV01000028	capU:3:CP002729																						A
SRR8901430	K88ab:6:CP002730	astA:6:AY545598		iha:14:AE005174	ltcA:10:EU113243			stb:1:AY028790	terC:8:CP006262	traT:131:NZ_QXIP01000066	capU:3:CP002729																						A
SRR8901439	K88ab:7:AJ616239	astA:3:AB042005	gad:17:U00096	iha:14:AE005174	ltcA:10:EU113243				terC:8:CP006262	traT:13:NC_007675	capU:3:CP002729	cia:1:APXL01000039			cib:2:HQ114281		cba:14:FJ664743	cma:6:FJ664745	hra:10:JF808724														A
SRR8901452	K88ab:6:CP002730	astA:6:AY545598	gad:27:U00096	iha:14:AE005174	ltcA:10:EU113243			stb:1:AY028790	terC:8:CP006262	traT:56:CYCV01000028	capU:3:CP002729																						A
SRR9913963	K88ab:6:CP002730	astA:10:L11241		iha:14:AE005174	ltcA:10:EU113243	sepA:2:AY604009	sta1:1:M25607	stb:1:AY028790	terC:8:CP006262	traT:56:CYCV01000028	capU:3:CP002729																						A
SRR9914120	K88ab:6:CP002730	astA:10:L11241		iha:14:AE005174	ltcA:10:EU113243	sepA:2:AY604009	sta1:1:M25607	stb:3:CP000913	terC:8:CP006262	traT:56:CYCV01000028	capU:3:CP002729																						A
