# Supplementary material for: High Risk Clone: A Proposal of Criteria Adapted to the One Health Context with Application to Enterotoxigenic Escherichia coli in the Pig Population
Source: Antibiotics (Basel). 2021 Feb 28;10(3):244. doi: 10.3390/antibiotics10030244 (PMC8000703; doi:10.3390/antibiotics10030244)
Supplement: Supplementary file 1 [file antibiotics-10-00244-s001.zip › TableS4_VFDBresults.xlsx]

## Sheet: srst2_total_2
ID_isolate	APECO78_03970	APECO78_03975	APECO78_08685	APECO78_08690	APECO78_08695	CDCO157_0108	EC958_1421	EC958_4121	EC958_5138	ECH74115_1100	ECH74115_1101	ECO103_0224	ECO111_0230	ECO55CA74_05720	ECO55CA74_05725	ECP_0106	ECP_0107	ECP_0108	ECS88_3547	ECVR50_0238	ECVR50_0239	ECVR50_0240	ECVR50_0242	ECVR50_0246	ECVR50_0247	ECVR50_0248	ECVR50_0249	ECVR50_0250	ECVR50_0257	ECs0229	ECs3712	ETEC_0103	ETEC_1007	ETEC_1008	ETEC_1011	EcE24377A_0237	EcE24377A_1056	G2583_0236	O3M_16610	O3M_16615	O3M_20335	O3M_20925	O3M_20930	UMNK88_1093	UMNK88_1094	UMNK88_1095	UMNK88_1096	UMNK88_238	Z0260
ECL00103	VFG046044 (APECO78_03970) type IV pilin biogenesis protein [Hemorrhagic E.coli pilus (HCP) (CVF825)] [Escherichia coli O78:H18 str. WS3294A]	VFG046007 (APECO78_03975) hypothetical protein [Hemorrhagic E.coli pilus (HCP) (CVF825)] [Escherichia coli O78:H18 str. WS3294A]	VFG045899 (APECO78_08685) periplasmic pilin chaperone [E.coli laminin-binding fimbriae (ELF) (CVF824)] [Escherichia coli O78:H18 str. WS3294A]	VFG045915 (APECO78_08690) outer membrane usher protein [E.coli laminin-binding fimbriae (ELF) (CVF824)] [Escherichia coli O78:H18 str. WS3294A]	VFG045935 (APECO78_08695) fimbrial-like adhesin protein [E.coli laminin-binding fimbriae (ELF) (CVF824)] [Escherichia coli O78:H18 str. WS3294A]	VFG045983 (CDCO157_0108) hypothetical protein [Hemorrhagic E.coli pilus (HCP) (CVF825)] [Escherichia coli O157:H7 str. Xuzhou21]	VFG045827 (EC958_1421) hemolysin E [Hemolysin/cytolysin A (CVF750)] [Escherichia coli O25b:H4-ST131]				VFG045884 (ECH74115_1101) periplasmic pilus chaperone family protein [E.coli laminin-binding fimbriae (ELF) (CVF824)] [Escherichia coli O157:H7 str. EC4115]				VFG045881 (ECO55CA74_05725) chaperone [E.coli laminin-binding fimbriae (ELF) (CVF824)] [Escherichia coli O55:H7 str. RM12579]	VFG046031 (ECP_0106) type IV pilin biogenesis protein [Hemorrhagic E.coli pilus (HCP) (CVF825)] [Escherichia coli 536]	VFG045993 (ECP_0107) hypothetical protein [Hemorrhagic E.coli pilus (HCP) (CVF825)] [Escherichia coli 536]	VFG045956 (ECP_0108) major pilin subunit [Hemorrhagic E.coli pilus (HCP) (CVF825)] [Escherichia coli 536]	VFG043545_gi:218560235_ (ECS88_3547) lipoprotein NlpI [NlpI (AI331)] [Escherichia coli O45:K1:H7 str. S88]												VFG042095_gi:15832966_ (ECs3712) hypothetical protein [ETT2 (SS017)] [Escherichia coli O157:H7 str. Sakai]	VFG046001 (ETEC_0103) protein transport protein HofB [Hemorrhagic E.coli pilus (HCP) (CVF825)] [Escherichia coli O78:H11:K80 str. H10407]	VFG045896 (ETEC_1007) periplasmic pilin chaperone [E.coli laminin-binding fimbriae (ELF) (CVF824)] [Escherichia coli O78:H11:K80 str. H10407]	VFG045912 (ETEC_1008) fimbrial outer membrane usher protein [E.coli laminin-binding fimbriae (ELF) (CVF824)] [Escherichia coli O78:H11:K80 str. H10407]	VFG045932 (ETEC_1011) fimbrial precursor [E.coli laminin-binding fimbriae (ELF) (CVF824)] [Escherichia coli O78:H11:K80 str. H10407]		VFG045931 (EcE24377A_1056) fimbrial protein [E.coli laminin-binding fimbriae (ELF) (CVF824)] [Escherichia coli E24377A]		VFG045926 (O3M_16610) fimbrial-like adhesin protein [E.coli laminin-binding fimbriae (ELF) (CVF824)] [Escherichia coli O104:H4 str. 2009EL-2050]	VFG045906 (O3M_16615) outer membrane usher protein [E.coli laminin-binding fimbriae (ELF) (CVF824)] [Escherichia coli O104:H4 str. 2009EL-2050]		VFG045950 (O3M_20925) major pilin subunit [Hemorrhagic E.coli pilus (HCP) (CVF825)] [Escherichia coli O104:H4 str. 2009EL-2050]	VFG045987 (O3M_20930) hypothetical protein [Hemorrhagic E.coli pilus (HCP) (CVF825)] [Escherichia coli O104:H4 str. 2009EL-2050]		VFG045897 (UMNK88_1094) chaperone protein FocC [E.coli laminin-binding fimbriae (ELF) (CVF824)] [Escherichia coli UMNK88]	VFG045913 (UMNK88_1095) outer membrane usher protein FimD [E.coli laminin-binding fimbriae (ELF) (CVF824)] [Escherichia coli UMNK88]	VFG045933 (UMNK88_1096) hypothetical protein [E.coli laminin-binding fimbriae (ELF) (CVF824)] [Escherichia coli UMNK88]
ECL00351	VFG046044 (APECO78_03970) type IV pilin biogenesis protein [Hemorrhagic E.coli pilus (HCP) (CVF825)] [Escherichia coli O78:H18 str. WS3294A]	VFG046007 (APECO78_03975) hypothetical protein [Hemorrhagic E.coli pilus (HCP) (CVF825)] [Escherichia coli O78:H18 str. WS3294A]	VFG045899 (APECO78_08685) periplasmic pilin chaperone [E.coli laminin-binding fimbriae (ELF) (CVF824)] [Escherichia coli O78:H18 str. WS3294A]	VFG045915 (APECO78_08690) outer membrane usher protein [E.coli laminin-binding fimbriae (ELF) (CVF824)] [Escherichia coli O78:H18 str. WS3294A]	VFG045935 (APECO78_08695) fimbrial-like adhesin protein [E.coli laminin-binding fimbriae (ELF) (CVF824)] [Escherichia coli O78:H18 str. WS3294A]	VFG045983 (CDCO157_0108) hypothetical protein [Hemorrhagic E.coli pilus (HCP) (CVF825)] [Escherichia coli O157:H7 str. Xuzhou21]	VFG045827 (EC958_1421) hemolysin E [Hemolysin/cytolysin A (CVF750)] [Escherichia coli O25b:H4-ST131]			VFG045862 (ECH74115_1100) fimbrial protein [E.coli laminin-binding fimbriae (ELF) (CVF824)] [Escherichia coli O157:H7 str. EC4115]	VFG045884 (ECH74115_1101) periplasmic pilus chaperone family protein [E.coli laminin-binding fimbriae (ELF) (CVF824)] [Escherichia coli O157:H7 str. EC4115]	VFG035720_gi:260842456_ (ECO103_0224) hypothetical protein [ACE T6SS (CVF736)] [Escherichia coli O103:H2 str. 12009]	VFG035721_gi:260866370_ (ECO111_0230) hypothetical protein [ACE T6SS (CVF736)] [Escherichia coli O111:H- str. 11128]	VFG045859 (ECO55CA74_05720) putative fimbrial-like adhesin protein [E.coli laminin-binding fimbriae (ELF) (CVF824)] [Escherichia coli O55:H7 str. RM12579]	VFG045881 (ECO55CA74_05725) chaperone [E.coli laminin-binding fimbriae (ELF) (CVF824)] [Escherichia coli O55:H7 str. RM12579]	VFG046031 (ECP_0106) type IV pilin biogenesis protein [Hemorrhagic E.coli pilus (HCP) (CVF825)] [Escherichia coli 536]	VFG045993 (ECP_0107) hypothetical protein [Hemorrhagic E.coli pilus (HCP) (CVF825)] [Escherichia coli 536]	VFG045956 (ECP_0108) major pilin subunit [Hemorrhagic E.coli pilus (HCP) (CVF825)] [Escherichia coli 536]	VFG043545_gi:218560235_ (ECS88_3547) lipoprotein NlpI [NlpI (AI331)] [Escherichia coli O45:K1:H7 str. S88]	VFG046082 (ECVR50_0238) hypothetical protein [ACE T6SS (CVF736)] [Escherichia coli VR50]	VFG046083 (ECVR50_0239) IcmF-related protein [ACE T6SS (CVF736)] [Escherichia coli VR50]	VFG046084 (ECVR50_0240) uncharacterized protein ImpA [ACE T6SS (CVF736)] [Escherichia coli VR50]	VFG046086 (ECVR50_0242) putative protease [ACE T6SS (CVF736)] [Escherichia coli VR50]	VFG046090 (ECVR50_0246) hypothetical protein [ACE T6SS (CVF736)] [Escherichia coli VR50]	VFG046091 (ECVR50_0247) hypothetical protein [ACE T6SS (CVF736)] [Escherichia coli VR50]	VFG046092 (ECVR50_0248) hypothetical protein [ACE T6SS (CVF736)] [Escherichia coli VR50]	VFG046093 (ECVR50_0249) hypothetical protein [ACE T6SS (CVF736)] [Escherichia coli VR50]	VFG046094 (ECVR50_0250) uncharacterized protein ImpC [ACE T6SS (CVF736)] [Escherichia coli VR50]	VFG046096 (ECVR50_0257) hypothetical protein [ACE T6SS (CVF736)] [Escherichia coli VR50]	VFG035711_gi:15829483_ (ECs0229) hypothetical protein [ACE T6SS (CVF736)] [Escherichia coli O157:H7 str. Sakai]	VFG042095_gi:15832966_ (ECs3712) hypothetical protein [ETT2 (SS017)] [Escherichia coli O157:H7 str. Sakai]	VFG046001 (ETEC_0103) protein transport protein HofB [Hemorrhagic E.coli pilus (HCP) (CVF825)] [Escherichia coli O78:H11:K80 str. H10407]	VFG045896 (ETEC_1007) periplasmic pilin chaperone [E.coli laminin-binding fimbriae (ELF) (CVF824)] [Escherichia coli O78:H11:K80 str. H10407]	VFG045912 (ETEC_1008) fimbrial outer membrane usher protein [E.coli laminin-binding fimbriae (ELF) (CVF824)] [Escherichia coli O78:H11:K80 str. H10407]	VFG045932 (ETEC_1011) fimbrial precursor [E.coli laminin-binding fimbriae (ELF) (CVF824)] [Escherichia coli O78:H11:K80 str. H10407]	VFG035728_gi:157155723_ (EcE24377A_0237) hypothetical protein [ACE T6SS (CVF736)] [Escherichia coli E24377A]	VFG045931 (EcE24377A_1056) fimbrial protein [E.coli laminin-binding fimbriae (ELF) (CVF824)] [Escherichia coli E24377A]	VFG035715_gi:291281048_ (G2583_0236) hypothetical protein [ACE T6SS (CVF736)] [Escherichia coli O55:H7 str. CB9615]	VFG045926 (O3M_16610) fimbrial-like adhesin protein [E.coli laminin-binding fimbriae (ELF) (CVF824)] [Escherichia coli O104:H4 str. 2009EL-2050]	VFG045906 (O3M_16615) outer membrane usher protein [E.coli laminin-binding fimbriae (ELF) (CVF824)] [Escherichia coli O104:H4 str. 2009EL-2050]	VFG035722_gi:410484142_ (O3M_20335) type VI secretion system protein ImpG [ACE T6SS (CVF736)] [Escherichia coli O104:H4 str. 2009EL-2050]	VFG045950 (O3M_20925) major pilin subunit [Hemorrhagic E.coli pilus (HCP) (CVF825)] [Escherichia coli O104:H4 str. 2009EL-2050]	VFG045987 (O3M_20930) hypothetical protein [Hemorrhagic E.coli pilus (HCP) (CVF825)] [Escherichia coli O104:H4 str. 2009EL-2050]	VFG045875 (UMNK88_1093) major type 1 subunit fimbrin FimA [E.coli laminin-binding fimbriae (ELF) (CVF824)] [Escherichia coli UMNK88]	VFG045897 (UMNK88_1094) chaperone protein FocC [E.coli laminin-binding fimbriae (ELF) (CVF824)] [Escherichia coli UMNK88]	VFG045913 (UMNK88_1095) outer membrane usher protein FimD [E.coli laminin-binding fimbriae (ELF) (CVF824)] [Escherichia coli UMNK88]	VFG045933 (UMNK88_1096) hypothetical protein [E.coli laminin-binding fimbriae (ELF) (CVF824)] [Escherichia coli UMNK88]	VFG035729_gi:386612389_ (UMNK88_238) hypothetical protein [ACE T6SS (CVF736)] [Escherichia coli UMNK88]	VFG035710_gi:15799909_ (Z0260) hypothetical protein [EHS (SS185)] [Escherichia coli O157:H7 str. EDL933]
ECL00652	VFG046044 (APECO78_03970) type IV pilin biogenesis protein [Hemorrhagic E.coli pilus (HCP) (CVF825)] [Escherichia coli O78:H18 str. WS3294A]	VFG046007 (APECO78_03975) hypothetical protein [Hemorrhagic E.coli pilus (HCP) (CVF825)] [Escherichia coli O78:H18 str. WS3294A]	VFG045899 (APECO78_08685) periplasmic pilin chaperone [E.coli laminin-binding fimbriae (ELF) (CVF824)] [Escherichia coli O78:H18 str. WS3294A]	VFG045915 (APECO78_08690) outer membrane usher protein [E.coli laminin-binding fimbriae (ELF) (CVF824)] [Escherichia coli O78:H18 str. WS3294A]	VFG045935 (APECO78_08695) fimbrial-like adhesin protein [E.coli laminin-binding fimbriae (ELF) (CVF824)] [Escherichia coli O78:H18 str. WS3294A]	VFG045983 (CDCO157_0108) hypothetical protein [Hemorrhagic E.coli pilus (HCP) (CVF825)] [Escherichia coli O157:H7 str. Xuzhou21]	VFG045827 (EC958_1421) hemolysin E [Hemolysin/cytolysin A (CVF750)] [Escherichia coli O25b:H4-ST131]			VFG045862 (ECH74115_1100) fimbrial protein [E.coli laminin-binding fimbriae (ELF) (CVF824)] [Escherichia coli O157:H7 str. EC4115]	VFG045884 (ECH74115_1101) periplasmic pilus chaperone family protein [E.coli laminin-binding fimbriae (ELF) (CVF824)] [Escherichia coli O157:H7 str. EC4115]	VFG035720_gi:260842456_ (ECO103_0224) hypothetical protein [ACE T6SS (CVF736)] [Escherichia coli O103:H2 str. 12009]	VFG035721_gi:260866370_ (ECO111_0230) hypothetical protein [ACE T6SS (CVF736)] [Escherichia coli O111:H- str. 11128]	VFG045859 (ECO55CA74_05720) putative fimbrial-like adhesin protein [E.coli laminin-binding fimbriae (ELF) (CVF824)] [Escherichia coli O55:H7 str. RM12579]	VFG045881 (ECO55CA74_05725) chaperone [E.coli laminin-binding fimbriae (ELF) (CVF824)] [Escherichia coli O55:H7 str. RM12579]	VFG046031 (ECP_0106) type IV pilin biogenesis protein [Hemorrhagic E.coli pilus (HCP) (CVF825)] [Escherichia coli 536]	VFG045993 (ECP_0107) hypothetical protein [Hemorrhagic E.coli pilus (HCP) (CVF825)] [Escherichia coli 536]	VFG045956 (ECP_0108) major pilin subunit [Hemorrhagic E.coli pilus (HCP) (CVF825)] [Escherichia coli 536]	VFG043545_gi:218560235_ (ECS88_3547) lipoprotein NlpI [NlpI (AI331)] [Escherichia coli O45:K1:H7 str. S88]	VFG046082 (ECVR50_0238) hypothetical protein [ACE T6SS (CVF736)] [Escherichia coli VR50]	VFG046083 (ECVR50_0239) IcmF-related protein [ACE T6SS (CVF736)] [Escherichia coli VR50]	VFG046084 (ECVR50_0240) uncharacterized protein ImpA [ACE T6SS (CVF736)] [Escherichia coli VR50]	VFG046086 (ECVR50_0242) putative protease [ACE T6SS (CVF736)] [Escherichia coli VR50]	VFG046090 (ECVR50_0246) hypothetical protein [ACE T6SS (CVF736)] [Escherichia coli VR50]	VFG046091 (ECVR50_0247) hypothetical protein [ACE T6SS (CVF736)] [Escherichia coli VR50]	VFG046092 (ECVR50_0248) hypothetical protein [ACE T6SS (CVF736)] [Escherichia coli VR50]	VFG046093 (ECVR50_0249) hypothetical protein [ACE T6SS (CVF736)] [Escherichia coli VR50]	VFG046094 (ECVR50_0250) uncharacterized protein ImpC [ACE T6SS (CVF736)] [Escherichia coli VR50]	VFG046096 (ECVR50_0257) hypothetical protein [ACE T6SS (CVF736)] [Escherichia coli VR50]	VFG035711_gi:15829483_ (ECs0229) hypothetical protein [ACE T6SS (CVF736)] [Escherichia coli O157:H7 str. Sakai]	VFG042095_gi:15832966_ (ECs3712) hypothetical protein [ETT2 (SS017)] [Escherichia coli O157:H7 str. Sakai]	VFG046001 (ETEC_0103) protein transport protein HofB [Hemorrhagic E.coli pilus (HCP) (CVF825)] [Escherichia coli O78:H11:K80 str. H10407]	VFG045896 (ETEC_1007) periplasmic pilin chaperone [E.coli laminin-binding fimbriae (ELF) (CVF824)] [Escherichia coli O78:H11:K80 str. H10407]	VFG045912 (ETEC_1008) fimbrial outer membrane usher protein [E.coli laminin-binding fimbriae (ELF) (CVF824)] [Escherichia coli O78:H11:K80 str. H10407]	VFG045932 (ETEC_1011) fimbrial precursor [E.coli laminin-binding fimbriae (ELF) (CVF824)] [Escherichia coli O78:H11:K80 str. H10407]	VFG035728_gi:157155723_ (EcE24377A_0237) hypothetical protein [ACE T6SS (CVF736)] [Escherichia coli E24377A]	VFG045931 (EcE24377A_1056) fimbrial protein [E.coli laminin-binding fimbriae (ELF) (CVF824)] [Escherichia coli E24377A]	VFG035715_gi:291281048_ (G2583_0236) hypothetical protein [ACE T6SS (CVF736)] [Escherichia coli O55:H7 str. CB9615]	VFG045926 (O3M_16610) fimbrial-like adhesin protein [E.coli laminin-binding fimbriae (ELF) (CVF824)] [Escherichia coli O104:H4 str. 2009EL-2050]	VFG045906 (O3M_16615) outer membrane usher protein [E.coli laminin-binding fimbriae (ELF) (CVF824)] [Escherichia coli O104:H4 str. 2009EL-2050]	VFG035722_gi:410484142_ (O3M_20335) type VI secretion system protein ImpG [ACE T6SS (CVF736)] [Escherichia coli O104:H4 str. 2009EL-2050]	VFG045950 (O3M_20925) major pilin subunit [Hemorrhagic E.coli pilus (HCP) (CVF825)] [Escherichia coli O104:H4 str. 2009EL-2050]	VFG045987 (O3M_20930) hypothetical protein [Hemorrhagic E.coli pilus (HCP) (CVF825)] [Escherichia coli O104:H4 str. 2009EL-2050]	VFG045875 (UMNK88_1093) major type 1 subunit fimbrin FimA [E.coli laminin-binding fimbriae (ELF) (CVF824)] [Escherichia coli UMNK88]	VFG045897 (UMNK88_1094) chaperone protein FocC [E.coli laminin-binding fimbriae (ELF) (CVF824)] [Escherichia coli UMNK88]	VFG045913 (UMNK88_1095) outer membrane usher protein FimD [E.coli laminin-binding fimbriae (ELF) (CVF824)] [Escherichia coli UMNK88]	VFG045933 (UMNK88_1096) hypothetical protein [E.coli laminin-binding fimbriae (ELF) (CVF824)] [Escherichia coli UMNK88]	VFG035729_gi:386612389_ (UMNK88_238) hypothetical protein [ACE T6SS (CVF736)] [Escherichia coli UMNK88]	VFG035710_gi:15799909_ (Z0260) hypothetical protein [EHS (SS185)] [Escherichia coli O157:H7 str. EDL933]
ECL01302	VFG046044 (APECO78_03970) type IV pilin biogenesis protein [Hemorrhagic E.coli pilus (HCP) (CVF825)] [Escherichia coli O78:H18 str. WS3294A]	VFG046007 (APECO78_03975) hypothetical protein [Hemorrhagic E.coli pilus (HCP) (CVF825)] [Escherichia coli O78:H18 str. WS3294A]	VFG045899 (APECO78_08685) periplasmic pilin chaperone [E.coli laminin-binding fimbriae (ELF) (CVF824)] [Escherichia coli O78:H18 str. WS3294A]	VFG045915 (APECO78_08690) outer membrane usher protein [E.coli laminin-binding fimbriae (ELF) (CVF824)] [Escherichia coli O78:H18 str. WS3294A]	VFG045935 (APECO78_08695) fimbrial-like adhesin protein [E.coli laminin-binding fimbriae (ELF) (CVF824)] [Escherichia coli O78:H18 str. WS3294A]	VFG045983 (CDCO157_0108) hypothetical protein [Hemorrhagic E.coli pilus (HCP) (CVF825)] [Escherichia coli O157:H7 str. Xuzhou21]	VFG045827 (EC958_1421) hemolysin E [Hemolysin/cytolysin A (CVF750)] [Escherichia coli O25b:H4-ST131]				VFG045884 (ECH74115_1101) periplasmic pilus chaperone family protein [E.coli laminin-binding fimbriae (ELF) (CVF824)] [Escherichia coli O157:H7 str. EC4115]				VFG045881 (ECO55CA74_05725) chaperone [E.coli laminin-binding fimbriae (ELF) (CVF824)] [Escherichia coli O55:H7 str. RM12579]	VFG046031 (ECP_0106) type IV pilin biogenesis protein [Hemorrhagic E.coli pilus (HCP) (CVF825)] [Escherichia coli 536]	VFG045993 (ECP_0107) hypothetical protein [Hemorrhagic E.coli pilus (HCP) (CVF825)] [Escherichia coli 536]	VFG045956 (ECP_0108) major pilin subunit [Hemorrhagic E.coli pilus (HCP) (CVF825)] [Escherichia coli 536]	VFG043545_gi:218560235_ (ECS88_3547) lipoprotein NlpI [NlpI (AI331)] [Escherichia coli O45:K1:H7 str. S88]												VFG042095_gi:15832966_ (ECs3712) hypothetical protein [ETT2 (SS017)] [Escherichia coli O157:H7 str. Sakai]	VFG046001 (ETEC_0103) protein transport protein HofB [Hemorrhagic E.coli pilus (HCP) (CVF825)] [Escherichia coli O78:H11:K80 str. H10407]	VFG045896 (ETEC_1007) periplasmic pilin chaperone [E.coli laminin-binding fimbriae (ELF) (CVF824)] [Escherichia coli O78:H11:K80 str. H10407]	VFG045912 (ETEC_1008) fimbrial outer membrane usher protein [E.coli laminin-binding fimbriae (ELF) (CVF824)] [Escherichia coli O78:H11:K80 str. H10407]	VFG045932 (ETEC_1011) fimbrial precursor [E.coli laminin-binding fimbriae (ELF) (CVF824)] [Escherichia coli O78:H11:K80 str. H10407]		VFG045931 (EcE24377A_1056) fimbrial protein [E.coli laminin-binding fimbriae (ELF) (CVF824)] [Escherichia coli E24377A]		VFG045926 (O3M_16610) fimbrial-like adhesin protein [E.coli laminin-binding fimbriae (ELF) (CVF824)] [Escherichia coli O104:H4 str. 2009EL-2050]	VFG045906 (O3M_16615) outer membrane usher protein [E.coli laminin-binding fimbriae (ELF) (CVF824)] [Escherichia coli O104:H4 str. 2009EL-2050]		VFG045950 (O3M_20925) major pilin subunit [Hemorrhagic E.coli pilus (HCP) (CVF825)] [Escherichia coli O104:H4 str. 2009EL-2050]	VFG045987 (O3M_20930) hypothetical protein [Hemorrhagic E.coli pilus (HCP) (CVF825)] [Escherichia coli O104:H4 str. 2009EL-2050]		VFG045897 (UMNK88_1094) chaperone protein FocC [E.coli laminin-binding fimbriae (ELF) (CVF824)] [Escherichia coli UMNK88]	VFG045913 (UMNK88_1095) outer membrane usher protein FimD [E.coli laminin-binding fimbriae (ELF) (CVF824)] [Escherichia coli UMNK88]	VFG045933 (UMNK88_1096) hypothetical protein [E.coli laminin-binding fimbriae (ELF) (CVF824)] [Escherichia coli UMNK88]
ECL01669	VFG046044 (APECO78_03970) type IV pilin biogenesis protein [Hemorrhagic E.coli pilus (HCP) (CVF825)] [Escherichia coli O78:H18 str. WS3294A]	VFG046007 (APECO78_03975) hypothetical protein [Hemorrhagic E.coli pilus (HCP) (CVF825)] [Escherichia coli O78:H18 str. WS3294A]	VFG045899 (APECO78_08685) periplasmic pilin chaperone [E.coli laminin-binding fimbriae (ELF) (CVF824)] [Escherichia coli O78:H18 str. WS3294A]	VFG045915 (APECO78_08690) outer membrane usher protein [E.coli laminin-binding fimbriae (ELF) (CVF824)] [Escherichia coli O78:H18 str. WS3294A]	VFG045935 (APECO78_08695) fimbrial-like adhesin protein [E.coli laminin-binding fimbriae (ELF) (CVF824)] [Escherichia coli O78:H18 str. WS3294A]	VFG045983 (CDCO157_0108) hypothetical protein [Hemorrhagic E.coli pilus (HCP) (CVF825)] [Escherichia coli O157:H7 str. Xuzhou21]	VFG045827 (EC958_1421) hemolysin E [Hemolysin/cytolysin A (CVF750)] [Escherichia coli O25b:H4-ST131]				VFG045884 (ECH74115_1101) periplasmic pilus chaperone family protein [E.coli laminin-binding fimbriae (ELF) (CVF824)] [Escherichia coli O157:H7 str. EC4115]				VFG045881 (ECO55CA74_05725) chaperone [E.coli laminin-binding fimbriae (ELF) (CVF824)] [Escherichia coli O55:H7 str. RM12579]	VFG046031 (ECP_0106) type IV pilin biogenesis protein [Hemorrhagic E.coli pilus (HCP) (CVF825)] [Escherichia coli 536]	VFG045993 (ECP_0107) hypothetical protein [Hemorrhagic E.coli pilus (HCP) (CVF825)] [Escherichia coli 536]	VFG045956 (ECP_0108) major pilin subunit [Hemorrhagic E.coli pilus (HCP) (CVF825)] [Escherichia coli 536]	VFG043545_gi:218560235_ (ECS88_3547) lipoprotein NlpI [NlpI (AI331)] [Escherichia coli O45:K1:H7 str. S88]												VFG042095_gi:15832966_ (ECs3712) hypothetical protein [ETT2 (SS017)] [Escherichia coli O157:H7 str. Sakai]	VFG046001 (ETEC_0103) protein transport protein HofB [Hemorrhagic E.coli pilus (HCP) (CVF825)] [Escherichia coli O78:H11:K80 str. H10407]	VFG045896 (ETEC_1007) periplasmic pilin chaperone [E.coli laminin-binding fimbriae (ELF) (CVF824)] [Escherichia coli O78:H11:K80 str. H10407]	VFG045912 (ETEC_1008) fimbrial outer membrane usher protein [E.coli laminin-binding fimbriae (ELF) (CVF824)] [Escherichia coli O78:H11:K80 str. H10407]	VFG045932 (ETEC_1011) fimbrial precursor [E.coli laminin-binding fimbriae (ELF) (CVF824)] [Escherichia coli O78:H11:K80 str. H10407]		VFG045931 (EcE24377A_1056) fimbrial protein [E.coli laminin-binding fimbriae (ELF) (CVF824)] [Escherichia coli E24377A]		VFG045926 (O3M_16610) fimbrial-like adhesin protein [E.coli laminin-binding fimbriae (ELF) (CVF824)] [Escherichia coli O104:H4 str. 2009EL-2050]	VFG045906 (O3M_16615) outer membrane usher protein [E.coli laminin-binding fimbriae (ELF) (CVF824)] [Escherichia coli O104:H4 str. 2009EL-2050]		VFG045950 (O3M_20925) major pilin subunit [Hemorrhagic E.coli pilus (HCP) (CVF825)] [Escherichia coli O104:H4 str. 2009EL-2050]	VFG045987 (O3M_20930) hypothetical protein [Hemorrhagic E.coli pilus (HCP) (CVF825)] [Escherichia coli O104:H4 str. 2009EL-2050]		VFG045897 (UMNK88_1094) chaperone protein FocC [E.coli laminin-binding fimbriae (ELF) (CVF824)] [Escherichia coli UMNK88]	VFG045913 (UMNK88_1095) outer membrane usher protein FimD [E.coli laminin-binding fimbriae (ELF) (CVF824)] [Escherichia coli UMNK88]	VFG045933 (UMNK88_1096) hypothetical protein [E.coli laminin-binding fimbriae (ELF) (CVF824)] [Escherichia coli UMNK88]
ECL01947	VFG046044 (APECO78_03970) type IV pilin biogenesis protein [Hemorrhagic E.coli pilus (HCP) (CVF825)] [Escherichia coli O78:H18 str. WS3294A]	VFG046007 (APECO78_03975) hypothetical protein [Hemorrhagic E.coli pilus (HCP) (CVF825)] [Escherichia coli O78:H18 str. WS3294A]	VFG045899 (APECO78_08685) periplasmic pilin chaperone [E.coli laminin-binding fimbriae (ELF) (CVF824)] [Escherichia coli O78:H18 str. WS3294A]	VFG045915 (APECO78_08690) outer membrane usher protein [E.coli laminin-binding fimbriae (ELF) (CVF824)] [Escherichia coli O78:H18 str. WS3294A]	VFG045935 (APECO78_08695) fimbrial-like adhesin protein [E.coli laminin-binding fimbriae (ELF) (CVF824)] [Escherichia coli O78:H18 str. WS3294A]	VFG045983 (CDCO157_0108) hypothetical protein [Hemorrhagic E.coli pilus (HCP) (CVF825)] [Escherichia coli O157:H7 str. Xuzhou21]	VFG045827 (EC958_1421) hemolysin E [Hemolysin/cytolysin A (CVF750)] [Escherichia coli O25b:H4-ST131]				VFG045884 (ECH74115_1101) periplasmic pilus chaperone family protein [E.coli laminin-binding fimbriae (ELF) (CVF824)] [Escherichia coli O157:H7 str. EC4115]				VFG045881 (ECO55CA74_05725) chaperone [E.coli laminin-binding fimbriae (ELF) (CVF824)] [Escherichia coli O55:H7 str. RM12579]	VFG046031 (ECP_0106) type IV pilin biogenesis protein [Hemorrhagic E.coli pilus (HCP) (CVF825)] [Escherichia coli 536]	VFG045993 (ECP_0107) hypothetical protein [Hemorrhagic E.coli pilus (HCP) (CVF825)] [Escherichia coli 536]	VFG045956 (ECP_0108) major pilin subunit [Hemorrhagic E.coli pilus (HCP) (CVF825)] [Escherichia coli 536]	VFG043545_gi:218560235_ (ECS88_3547) lipoprotein NlpI [NlpI (AI331)] [Escherichia coli O45:K1:H7 str. S88]												VFG042095_gi:15832966_ (ECs3712) hypothetical protein [ETT2 (SS017)] [Escherichia coli O157:H7 str. Sakai]	VFG046001 (ETEC_0103) protein transport protein HofB [Hemorrhagic E.coli pilus (HCP) (CVF825)] [Escherichia coli O78:H11:K80 str. H10407]	VFG045896 (ETEC_1007) periplasmic pilin chaperone [E.coli laminin-binding fimbriae (ELF) (CVF824)] [Escherichia coli O78:H11:K80 str. H10407]	VFG045912 (ETEC_1008) fimbrial outer membrane usher protein [E.coli laminin-binding fimbriae (ELF) (CVF824)] [Escherichia coli O78:H11:K80 str. H10407]	VFG045932 (ETEC_1011) fimbrial precursor [E.coli laminin-binding fimbriae (ELF) (CVF824)] [Escherichia coli O78:H11:K80 str. H10407]		VFG045931 (EcE24377A_1056) fimbrial protein [E.coli laminin-binding fimbriae (ELF) (CVF824)] [Escherichia coli E24377A]		VFG045926 (O3M_16610) fimbrial-like adhesin protein [E.coli laminin-binding fimbriae (ELF) (CVF824)] [Escherichia coli O104:H4 str. 2009EL-2050]	VFG045906 (O3M_16615) outer membrane usher protein [E.coli laminin-binding fimbriae (ELF) (CVF824)] [Escherichia coli O104:H4 str. 2009EL-2050]		VFG045950 (O3M_20925) major pilin subunit [Hemorrhagic E.coli pilus (HCP) (CVF825)] [Escherichia coli O104:H4 str. 2009EL-2050]	VFG045987 (O3M_20930) hypothetical protein [Hemorrhagic E.coli pilus (HCP) (CVF825)] [Escherichia coli O104:H4 str. 2009EL-2050]		VFG045897 (UMNK88_1094) chaperone protein FocC [E.coli laminin-binding fimbriae (ELF) (CVF824)] [Escherichia coli UMNK88]	VFG045913 (UMNK88_1095) outer membrane usher protein FimD [E.coli laminin-binding fimbriae (ELF) (CVF824)] [Escherichia coli UMNK88]	VFG045933 (UMNK88_1096) hypothetical protein [E.coli laminin-binding fimbriae (ELF) (CVF824)] [Escherichia coli UMNK88]
ECL02602	VFG046044 (APECO78_03970) type IV pilin biogenesis protein [Hemorrhagic E.coli pilus (HCP) (CVF825)] [Escherichia coli O78:H18 str. WS3294A]	VFG046007 (APECO78_03975) hypothetical protein [Hemorrhagic E.coli pilus (HCP) (CVF825)] [Escherichia coli O78:H18 str. WS3294A]	VFG045899 (APECO78_08685) periplasmic pilin chaperone [E.coli laminin-binding fimbriae (ELF) (CVF824)] [Escherichia coli O78:H18 str. WS3294A]	VFG045915 (APECO78_08690) outer membrane usher protein [E.coli laminin-binding fimbriae (ELF) (CVF824)] [Escherichia coli O78:H18 str. WS3294A]	VFG045935 (APECO78_08695) fimbrial-like adhesin protein [E.coli laminin-binding fimbriae (ELF) (CVF824)] [Escherichia coli O78:H18 str. WS3294A]	VFG045983 (CDCO157_0108) hypothetical protein [Hemorrhagic E.coli pilus (HCP) (CVF825)] [Escherichia coli O157:H7 str. Xuzhou21]	VFG045827 (EC958_1421) hemolysin E [Hemolysin/cytolysin A (CVF750)] [Escherichia coli O25b:H4-ST131]				VFG045884 (ECH74115_1101) periplasmic pilus chaperone family protein [E.coli laminin-binding fimbriae (ELF) (CVF824)] [Escherichia coli O157:H7 str. EC4115]				VFG045881 (ECO55CA74_05725) chaperone [E.coli laminin-binding fimbriae (ELF) (CVF824)] [Escherichia coli O55:H7 str. RM12579]	VFG046031 (ECP_0106) type IV pilin biogenesis protein [Hemorrhagic E.coli pilus (HCP) (CVF825)] [Escherichia coli 536]	VFG045993 (ECP_0107) hypothetical protein [Hemorrhagic E.coli pilus (HCP) (CVF825)] [Escherichia coli 536]	VFG045956 (ECP_0108) major pilin subunit [Hemorrhagic E.coli pilus (HCP) (CVF825)] [Escherichia coli 536]	VFG043545_gi:218560235_ (ECS88_3547) lipoprotein NlpI [NlpI (AI331)] [Escherichia coli O45:K1:H7 str. S88]												VFG042095_gi:15832966_ (ECs3712) hypothetical protein [ETT2 (SS017)] [Escherichia coli O157:H7 str. Sakai]	VFG046001 (ETEC_0103) protein transport protein HofB [Hemorrhagic E.coli pilus (HCP) (CVF825)] [Escherichia coli O78:H11:K80 str. H10407]	VFG045896 (ETEC_1007) periplasmic pilin chaperone [E.coli laminin-binding fimbriae (ELF) (CVF824)] [Escherichia coli O78:H11:K80 str. H10407]	VFG045912 (ETEC_1008) fimbrial outer membrane usher protein [E.coli laminin-binding fimbriae (ELF) (CVF824)] [Escherichia coli O78:H11:K80 str. H10407]	VFG045932 (ETEC_1011) fimbrial precursor [E.coli laminin-binding fimbriae (ELF) (CVF824)] [Escherichia coli O78:H11:K80 str. H10407]		VFG045931 (EcE24377A_1056) fimbrial protein [E.coli laminin-binding fimbriae (ELF) (CVF824)] [Escherichia coli E24377A]		VFG045926 (O3M_16610) fimbrial-like adhesin protein [E.coli laminin-binding fimbriae (ELF) (CVF824)] [Escherichia coli O104:H4 str. 2009EL-2050]	VFG045906 (O3M_16615) outer membrane usher protein [E.coli laminin-binding fimbriae (ELF) (CVF824)] [Escherichia coli O104:H4 str. 2009EL-2050]		VFG045950 (O3M_20925) major pilin subunit [Hemorrhagic E.coli pilus (HCP) (CVF825)] [Escherichia coli O104:H4 str. 2009EL-2050]	VFG045987 (O3M_20930) hypothetical protein [Hemorrhagic E.coli pilus (HCP) (CVF825)] [Escherichia coli O104:H4 str. 2009EL-2050]		VFG045897 (UMNK88_1094) chaperone protein FocC [E.coli laminin-binding fimbriae (ELF) (CVF824)] [Escherichia coli UMNK88]	VFG045913 (UMNK88_1095) outer membrane usher protein FimD [E.coli laminin-binding fimbriae (ELF) (CVF824)] [Escherichia coli UMNK88]	VFG045933 (UMNK88_1096) hypothetical protein [E.coli laminin-binding fimbriae (ELF) (CVF824)] [Escherichia coli UMNK88]
ECL02964	VFG046044 (APECO78_03970) type IV pilin biogenesis protein [Hemorrhagic E.coli pilus (HCP) (CVF825)] [Escherichia coli O78:H18 str. WS3294A]	VFG046007 (APECO78_03975) hypothetical protein [Hemorrhagic E.coli pilus (HCP) (CVF825)] [Escherichia coli O78:H18 str. WS3294A]	VFG045899 (APECO78_08685) periplasmic pilin chaperone [E.coli laminin-binding fimbriae (ELF) (CVF824)] [Escherichia coli O78:H18 str. WS3294A]	VFG045915 (APECO78_08690) outer membrane usher protein [E.coli laminin-binding fimbriae (ELF) (CVF824)] [Escherichia coli O78:H18 str. WS3294A]	VFG045935 (APECO78_08695) fimbrial-like adhesin protein [E.coli laminin-binding fimbriae (ELF) (CVF824)] [Escherichia coli O78:H18 str. WS3294A]	VFG045983 (CDCO157_0108) hypothetical protein [Hemorrhagic E.coli pilus (HCP) (CVF825)] [Escherichia coli O157:H7 str. Xuzhou21]	VFG045827 (EC958_1421) hemolysin E [Hemolysin/cytolysin A (CVF750)] [Escherichia coli O25b:H4-ST131]				VFG045884 (ECH74115_1101) periplasmic pilus chaperone family protein [E.coli laminin-binding fimbriae (ELF) (CVF824)] [Escherichia coli O157:H7 str. EC4115]				VFG045881 (ECO55CA74_05725) chaperone [E.coli laminin-binding fimbriae (ELF) (CVF824)] [Escherichia coli O55:H7 str. RM12579]	VFG046031 (ECP_0106) type IV pilin biogenesis protein [Hemorrhagic E.coli pilus (HCP) (CVF825)] [Escherichia coli 536]	VFG045993 (ECP_0107) hypothetical protein [Hemorrhagic E.coli pilus (HCP) (CVF825)] [Escherichia coli 536]	VFG045956 (ECP_0108) major pilin subunit [Hemorrhagic E.coli pilus (HCP) (CVF825)] [Escherichia coli 536]	VFG043545_gi:218560235_ (ECS88_3547) lipoprotein NlpI [NlpI (AI331)] [Escherichia coli O45:K1:H7 str. S88]												VFG042095_gi:15832966_ (ECs3712) hypothetical protein [ETT2 (SS017)] [Escherichia coli O157:H7 str. Sakai]	VFG046001 (ETEC_0103) protein transport protein HofB [Hemorrhagic E.coli pilus (HCP) (CVF825)] [Escherichia coli O78:H11:K80 str. H10407]	VFG045896 (ETEC_1007) periplasmic pilin chaperone [E.coli laminin-binding fimbriae (ELF) (CVF824)] [Escherichia coli O78:H11:K80 str. H10407]	VFG045912 (ETEC_1008) fimbrial outer membrane usher protein [E.coli laminin-binding fimbriae (ELF) (CVF824)] [Escherichia coli O78:H11:K80 str. H10407]	VFG045932 (ETEC_1011) fimbrial precursor [E.coli laminin-binding fimbriae (ELF) (CVF824)] [Escherichia coli O78:H11:K80 str. H10407]		VFG045931 (EcE24377A_1056) fimbrial protein [E.coli laminin-binding fimbriae (ELF) (CVF824)] [Escherichia coli E24377A]		VFG045926 (O3M_16610) fimbrial-like adhesin protein [E.coli laminin-binding fimbriae (ELF) (CVF824)] [Escherichia coli O104:H4 str. 2009EL-2050]	VFG045906 (O3M_16615) outer membrane usher protein [E.coli laminin-binding fimbriae (ELF) (CVF824)] [Escherichia coli O104:H4 str. 2009EL-2050]		VFG045950 (O3M_20925) major pilin subunit [Hemorrhagic E.coli pilus (HCP) (CVF825)] [Escherichia coli O104:H4 str. 2009EL-2050]	VFG045987 (O3M_20930) hypothetical protein [Hemorrhagic E.coli pilus (HCP) (CVF825)] [Escherichia coli O104:H4 str. 2009EL-2050]		VFG045897 (UMNK88_1094) chaperone protein FocC [E.coli laminin-binding fimbriae (ELF) (CVF824)] [Escherichia coli UMNK88]	VFG045913 (UMNK88_1095) outer membrane usher protein FimD [E.coli laminin-binding fimbriae (ELF) (CVF824)] [Escherichia coli UMNK88]	VFG045933 (UMNK88_1096) hypothetical protein [E.coli laminin-binding fimbriae (ELF) (CVF824)] [Escherichia coli UMNK88]
ECL03391	VFG046044 (APECO78_03970) type IV pilin biogenesis protein [Hemorrhagic E.coli pilus (HCP) (CVF825)] [Escherichia coli O78:H18 str. WS3294A]	VFG046007 (APECO78_03975) hypothetical protein [Hemorrhagic E.coli pilus (HCP) (CVF825)] [Escherichia coli O78:H18 str. WS3294A]	VFG045899 (APECO78_08685) periplasmic pilin chaperone [E.coli laminin-binding fimbriae (ELF) (CVF824)] [Escherichia coli O78:H18 str. WS3294A]	VFG045915 (APECO78_08690) outer membrane usher protein [E.coli laminin-binding fimbriae (ELF) (CVF824)] [Escherichia coli O78:H18 str. WS3294A]	VFG045935 (APECO78_08695) fimbrial-like adhesin protein [E.coli laminin-binding fimbriae (ELF) (CVF824)] [Escherichia coli O78:H18 str. WS3294A]	VFG045983 (CDCO157_0108) hypothetical protein [Hemorrhagic E.coli pilus (HCP) (CVF825)] [Escherichia coli O157:H7 str. Xuzhou21]	VFG045827 (EC958_1421) hemolysin E [Hemolysin/cytolysin A (CVF750)] [Escherichia coli O25b:H4-ST131]				VFG045884 (ECH74115_1101) periplasmic pilus chaperone family protein [E.coli laminin-binding fimbriae (ELF) (CVF824)] [Escherichia coli O157:H7 str. EC4115]				VFG045881 (ECO55CA74_05725) chaperone [E.coli laminin-binding fimbriae (ELF) (CVF824)] [Escherichia coli O55:H7 str. RM12579]	VFG046031 (ECP_0106) type IV pilin biogenesis protein [Hemorrhagic E.coli pilus (HCP) (CVF825)] [Escherichia coli 536]	VFG045993 (ECP_0107) hypothetical protein [Hemorrhagic E.coli pilus (HCP) (CVF825)] [Escherichia coli 536]	VFG045956 (ECP_0108) major pilin subunit [Hemorrhagic E.coli pilus (HCP) (CVF825)] [Escherichia coli 536]	VFG043545_gi:218560235_ (ECS88_3547) lipoprotein NlpI [NlpI (AI331)] [Escherichia coli O45:K1:H7 str. S88]												VFG042095_gi:15832966_ (ECs3712) hypothetical protein [ETT2 (SS017)] [Escherichia coli O157:H7 str. Sakai]	VFG046001 (ETEC_0103) protein transport protein HofB [Hemorrhagic E.coli pilus (HCP) (CVF825)] [Escherichia coli O78:H11:K80 str. H10407]	VFG045896 (ETEC_1007) periplasmic pilin chaperone [E.coli laminin-binding fimbriae (ELF) (CVF824)] [Escherichia coli O78:H11:K80 str. H10407]	VFG045912 (ETEC_1008) fimbrial outer membrane usher protein [E.coli laminin-binding fimbriae (ELF) (CVF824)] [Escherichia coli O78:H11:K80 str. H10407]	VFG045932 (ETEC_1011) fimbrial precursor [E.coli laminin-binding fimbriae (ELF) (CVF824)] [Escherichia coli O78:H11:K80 str. H10407]		VFG045931 (EcE24377A_1056) fimbrial protein [E.coli laminin-binding fimbriae (ELF) (CVF824)] [Escherichia coli E24377A]		VFG045926 (O3M_16610) fimbrial-like adhesin protein [E.coli laminin-binding fimbriae (ELF) (CVF824)] [Escherichia coli O104:H4 str. 2009EL-2050]	VFG045906 (O3M_16615) outer membrane usher protein [E.coli laminin-binding fimbriae (ELF) (CVF824)] [Escherichia coli O104:H4 str. 2009EL-2050]		VFG045950 (O3M_20925) major pilin subunit [Hemorrhagic E.coli pilus (HCP) (CVF825)] [Escherichia coli O104:H4 str. 2009EL-2050]	VFG045987 (O3M_20930) hypothetical protein [Hemorrhagic E.coli pilus (HCP) (CVF825)] [Escherichia coli O104:H4 str. 2009EL-2050]		VFG045897 (UMNK88_1094) chaperone protein FocC [E.coli laminin-binding fimbriae (ELF) (CVF824)] [Escherichia coli UMNK88]	VFG045913 (UMNK88_1095) outer membrane usher protein FimD [E.coli laminin-binding fimbriae (ELF) (CVF824)] [Escherichia coli UMNK88]	VFG045933 (UMNK88_1096) hypothetical protein [E.coli laminin-binding fimbriae (ELF) (CVF824)] [Escherichia coli UMNK88]
ECL04323	VFG046044 (APECO78_03970) type IV pilin biogenesis protein [Hemorrhagic E.coli pilus (HCP) (CVF825)] [Escherichia coli O78:H18 str. WS3294A]	VFG046007 (APECO78_03975) hypothetical protein [Hemorrhagic E.coli pilus (HCP) (CVF825)] [Escherichia coli O78:H18 str. WS3294A]	VFG045899 (APECO78_08685) periplasmic pilin chaperone [E.coli laminin-binding fimbriae (ELF) (CVF824)] [Escherichia coli O78:H18 str. WS3294A]	VFG045915 (APECO78_08690) outer membrane usher protein [E.coli laminin-binding fimbriae (ELF) (CVF824)] [Escherichia coli O78:H18 str. WS3294A]	VFG045935 (APECO78_08695) fimbrial-like adhesin protein [E.coli laminin-binding fimbriae (ELF) (CVF824)] [Escherichia coli O78:H18 str. WS3294A]	VFG045983 (CDCO157_0108) hypothetical protein [Hemorrhagic E.coli pilus (HCP) (CVF825)] [Escherichia coli O157:H7 str. Xuzhou21]	VFG045827 (EC958_1421) hemolysin E [Hemolysin/cytolysin A (CVF750)] [Escherichia coli O25b:H4-ST131]				VFG045884 (ECH74115_1101) periplasmic pilus chaperone family protein [E.coli laminin-binding fimbriae (ELF) (CVF824)] [Escherichia coli O157:H7 str. EC4115]				VFG045881 (ECO55CA74_05725) chaperone [E.coli laminin-binding fimbriae (ELF) (CVF824)] [Escherichia coli O55:H7 str. RM12579]	VFG046031 (ECP_0106) type IV pilin biogenesis protein [Hemorrhagic E.coli pilus (HCP) (CVF825)] [Escherichia coli 536]	VFG045993 (ECP_0107) hypothetical protein [Hemorrhagic E.coli pilus (HCP) (CVF825)] [Escherichia coli 536]	VFG045956 (ECP_0108) major pilin subunit [Hemorrhagic E.coli pilus (HCP) (CVF825)] [Escherichia coli 536]	VFG043545_gi:218560235_ (ECS88_3547) lipoprotein NlpI [NlpI (AI331)] [Escherichia coli O45:K1:H7 str. S88]												VFG042095_gi:15832966_ (ECs3712) hypothetical protein [ETT2 (SS017)] [Escherichia coli O157:H7 str. Sakai]	VFG046001 (ETEC_0103) protein transport protein HofB [Hemorrhagic E.coli pilus (HCP) (CVF825)] [Escherichia coli O78:H11:K80 str. H10407]	VFG045896 (ETEC_1007) periplasmic pilin chaperone [E.coli laminin-binding fimbriae (ELF) (CVF824)] [Escherichia coli O78:H11:K80 str. H10407]	VFG045912 (ETEC_1008) fimbrial outer membrane usher protein [E.coli laminin-binding fimbriae (ELF) (CVF824)] [Escherichia coli O78:H11:K80 str. H10407]	VFG045932 (ETEC_1011) fimbrial precursor [E.coli laminin-binding fimbriae (ELF) (CVF824)] [Escherichia coli O78:H11:K80 str. H10407]		VFG045931 (EcE24377A_1056) fimbrial protein [E.coli laminin-binding fimbriae (ELF) (CVF824)] [Escherichia coli E24377A]		VFG045926 (O3M_16610) fimbrial-like adhesin protein [E.coli laminin-binding fimbriae (ELF) (CVF824)] [Escherichia coli O104:H4 str. 2009EL-2050]	VFG045906 (O3M_16615) outer membrane usher protein [E.coli laminin-binding fimbriae (ELF) (CVF824)] [Escherichia coli O104:H4 str. 2009EL-2050]		VFG045950 (O3M_20925) major pilin subunit [Hemorrhagic E.coli pilus (HCP) (CVF825)] [Escherichia coli O104:H4 str. 2009EL-2050]	VFG045987 (O3M_20930) hypothetical protein [Hemorrhagic E.coli pilus (HCP) (CVF825)] [Escherichia coli O104:H4 str. 2009EL-2050]		VFG045897 (UMNK88_1094) chaperone protein FocC [E.coli laminin-binding fimbriae (ELF) (CVF824)] [Escherichia coli UMNK88]	VFG045913 (UMNK88_1095) outer membrane usher protein FimD [E.coli laminin-binding fimbriae (ELF) (CVF824)] [Escherichia coli UMNK88]	VFG045933 (UMNK88_1096) hypothetical protein [E.coli laminin-binding fimbriae (ELF) (CVF824)] [Escherichia coli UMNK88]
ECL04937	VFG046044 (APECO78_03970) type IV pilin biogenesis protein [Hemorrhagic E.coli pilus (HCP) (CVF825)] [Escherichia coli O78:H18 str. WS3294A]	VFG046007 (APECO78_03975) hypothetical protein [Hemorrhagic E.coli pilus (HCP) (CVF825)] [Escherichia coli O78:H18 str. WS3294A]	VFG045899 (APECO78_08685) periplasmic pilin chaperone [E.coli laminin-binding fimbriae (ELF) (CVF824)] [Escherichia coli O78:H18 str. WS3294A]	VFG045915 (APECO78_08690) outer membrane usher protein [E.coli laminin-binding fimbriae (ELF) (CVF824)] [Escherichia coli O78:H18 str. WS3294A]	VFG045935 (APECO78_08695) fimbrial-like adhesin protein [E.coli laminin-binding fimbriae (ELF) (CVF824)] [Escherichia coli O78:H18 str. WS3294A]	VFG045983 (CDCO157_0108) hypothetical protein [Hemorrhagic E.coli pilus (HCP) (CVF825)] [Escherichia coli O157:H7 str. Xuzhou21]	VFG045827 (EC958_1421) hemolysin E [Hemolysin/cytolysin A (CVF750)] [Escherichia coli O25b:H4-ST131]				VFG045884 (ECH74115_1101) periplasmic pilus chaperone family protein [E.coli laminin-binding fimbriae (ELF) (CVF824)] [Escherichia coli O157:H7 str. EC4115]				VFG045881 (ECO55CA74_05725) chaperone [E.coli laminin-binding fimbriae (ELF) (CVF824)] [Escherichia coli O55:H7 str. RM12579]	VFG046031 (ECP_0106) type IV pilin biogenesis protein [Hemorrhagic E.coli pilus (HCP) (CVF825)] [Escherichia coli 536]	VFG045993 (ECP_0107) hypothetical protein [Hemorrhagic E.coli pilus (HCP) (CVF825)] [Escherichia coli 536]	VFG045956 (ECP_0108) major pilin subunit [Hemorrhagic E.coli pilus (HCP) (CVF825)] [Escherichia coli 536]	VFG043545_gi:218560235_ (ECS88_3547) lipoprotein NlpI [NlpI (AI331)] [Escherichia coli O45:K1:H7 str. S88]												VFG042095_gi:15832966_ (ECs3712) hypothetical protein [ETT2 (SS017)] [Escherichia coli O157:H7 str. Sakai]	VFG046001 (ETEC_0103) protein transport protein HofB [Hemorrhagic E.coli pilus (HCP) (CVF825)] [Escherichia coli O78:H11:K80 str. H10407]	VFG045896 (ETEC_1007) periplasmic pilin chaperone [E.coli laminin-binding fimbriae (ELF) (CVF824)] [Escherichia coli O78:H11:K80 str. H10407]	VFG045912 (ETEC_1008) fimbrial outer membrane usher protein [E.coli laminin-binding fimbriae (ELF) (CVF824)] [Escherichia coli O78:H11:K80 str. H10407]	VFG045932 (ETEC_1011) fimbrial precursor [E.coli laminin-binding fimbriae (ELF) (CVF824)] [Escherichia coli O78:H11:K80 str. H10407]		VFG045931 (EcE24377A_1056) fimbrial protein [E.coli laminin-binding fimbriae (ELF) (CVF824)] [Escherichia coli E24377A]		VFG045926 (O3M_16610) fimbrial-like adhesin protein [E.coli laminin-binding fimbriae (ELF) (CVF824)] [Escherichia coli O104:H4 str. 2009EL-2050]	VFG045906 (O3M_16615) outer membrane usher protein [E.coli laminin-binding fimbriae (ELF) (CVF824)] [Escherichia coli O104:H4 str. 2009EL-2050]		VFG045950 (O3M_20925) major pilin subunit [Hemorrhagic E.coli pilus (HCP) (CVF825)] [Escherichia coli O104:H4 str. 2009EL-2050]	VFG045987 (O3M_20930) hypothetical protein [Hemorrhagic E.coli pilus (HCP) (CVF825)] [Escherichia coli O104:H4 str. 2009EL-2050]		VFG045897 (UMNK88_1094) chaperone protein FocC [E.coli laminin-binding fimbriae (ELF) (CVF824)] [Escherichia coli UMNK88]	VFG045913 (UMNK88_1095) outer membrane usher protein FimD [E.coli laminin-binding fimbriae (ELF) (CVF824)] [Escherichia coli UMNK88]	VFG045933 (UMNK88_1096) hypothetical protein [E.coli laminin-binding fimbriae (ELF) (CVF824)] [Escherichia coli UMNK88]
ECL05380	VFG046044 (APECO78_03970) type IV pilin biogenesis protein [Hemorrhagic E.coli pilus (HCP) (CVF825)] [Escherichia coli O78:H18 str. WS3294A]	VFG046007 (APECO78_03975) hypothetical protein [Hemorrhagic E.coli pilus (HCP) (CVF825)] [Escherichia coli O78:H18 str. WS3294A]	VFG045899 (APECO78_08685) periplasmic pilin chaperone [E.coli laminin-binding fimbriae (ELF) (CVF824)] [Escherichia coli O78:H18 str. WS3294A]	VFG045915 (APECO78_08690) outer membrane usher protein [E.coli laminin-binding fimbriae (ELF) (CVF824)] [Escherichia coli O78:H18 str. WS3294A]	VFG045935 (APECO78_08695) fimbrial-like adhesin protein [E.coli laminin-binding fimbriae (ELF) (CVF824)] [Escherichia coli O78:H18 str. WS3294A]	VFG045983 (CDCO157_0108) hypothetical protein [Hemorrhagic E.coli pilus (HCP) (CVF825)] [Escherichia coli O157:H7 str. Xuzhou21]	VFG045827 (EC958_1421) hemolysin E [Hemolysin/cytolysin A (CVF750)] [Escherichia coli O25b:H4-ST131]				VFG045884 (ECH74115_1101) periplasmic pilus chaperone family protein [E.coli laminin-binding fimbriae (ELF) (CVF824)] [Escherichia coli O157:H7 str. EC4115]				VFG045881 (ECO55CA74_05725) chaperone [E.coli laminin-binding fimbriae (ELF) (CVF824)] [Escherichia coli O55:H7 str. RM12579]	VFG046031 (ECP_0106) type IV pilin biogenesis protein [Hemorrhagic E.coli pilus (HCP) (CVF825)] [Escherichia coli 536]	VFG045993 (ECP_0107) hypothetical protein [Hemorrhagic E.coli pilus (HCP) (CVF825)] [Escherichia coli 536]	VFG045956 (ECP_0108) major pilin subunit [Hemorrhagic E.coli pilus (HCP) (CVF825)] [Escherichia coli 536]	VFG043545_gi:218560235_ (ECS88_3547) lipoprotein NlpI [NlpI (AI331)] [Escherichia coli O45:K1:H7 str. S88]												VFG042095_gi:15832966_ (ECs3712) hypothetical protein [ETT2 (SS017)] [Escherichia coli O157:H7 str. Sakai]	VFG046001 (ETEC_0103) protein transport protein HofB [Hemorrhagic E.coli pilus (HCP) (CVF825)] [Escherichia coli O78:H11:K80 str. H10407]	VFG045896 (ETEC_1007) periplasmic pilin chaperone [E.coli laminin-binding fimbriae (ELF) (CVF824)] [Escherichia coli O78:H11:K80 str. H10407]	VFG045912 (ETEC_1008) fimbrial outer membrane usher protein [E.coli laminin-binding fimbriae (ELF) (CVF824)] [Escherichia coli O78:H11:K80 str. H10407]	VFG045932 (ETEC_1011) fimbrial precursor [E.coli laminin-binding fimbriae (ELF) (CVF824)] [Escherichia coli O78:H11:K80 str. H10407]		VFG045931 (EcE24377A_1056) fimbrial protein [E.coli laminin-binding fimbriae (ELF) (CVF824)] [Escherichia coli E24377A]		VFG045926 (O3M_16610) fimbrial-like adhesin protein [E.coli laminin-binding fimbriae (ELF) (CVF824)] [Escherichia coli O104:H4 str. 2009EL-2050]	VFG045906 (O3M_16615) outer membrane usher protein [E.coli laminin-binding fimbriae (ELF) (CVF824)] [Escherichia coli O104:H4 str. 2009EL-2050]		VFG045950 (O3M_20925) major pilin subunit [Hemorrhagic E.coli pilus (HCP) (CVF825)] [Escherichia coli O104:H4 str. 2009EL-2050]	VFG045987 (O3M_20930) hypothetical protein [Hemorrhagic E.coli pilus (HCP) (CVF825)] [Escherichia coli O104:H4 str. 2009EL-2050]		VFG045897 (UMNK88_1094) chaperone protein FocC [E.coli laminin-binding fimbriae (ELF) (CVF824)] [Escherichia coli UMNK88]	VFG045913 (UMNK88_1095) outer membrane usher protein FimD [E.coli laminin-binding fimbriae (ELF) (CVF824)] [Escherichia coli UMNK88]	VFG045933 (UMNK88_1096) hypothetical protein [E.coli laminin-binding fimbriae (ELF) (CVF824)] [Escherichia coli UMNK88]
ECL05543	VFG046044 (APECO78_03970) type IV pilin biogenesis protein [Hemorrhagic E.coli pilus (HCP) (CVF825)] [Escherichia coli O78:H18 str. WS3294A]	VFG046007 (APECO78_03975) hypothetical protein [Hemorrhagic E.coli pilus (HCP) (CVF825)] [Escherichia coli O78:H18 str. WS3294A]	VFG045899 (APECO78_08685) periplasmic pilin chaperone [E.coli laminin-binding fimbriae (ELF) (CVF824)] [Escherichia coli O78:H18 str. WS3294A]	VFG045915 (APECO78_08690) outer membrane usher protein [E.coli laminin-binding fimbriae (ELF) (CVF824)] [Escherichia coli O78:H18 str. WS3294A]	VFG045935 (APECO78_08695) fimbrial-like adhesin protein [E.coli laminin-binding fimbriae (ELF) (CVF824)] [Escherichia coli O78:H18 str. WS3294A]	VFG045983 (CDCO157_0108) hypothetical protein [Hemorrhagic E.coli pilus (HCP) (CVF825)] [Escherichia coli O157:H7 str. Xuzhou21]	VFG045827 (EC958_1421) hemolysin E [Hemolysin/cytolysin A (CVF750)] [Escherichia coli O25b:H4-ST131]				VFG045884 (ECH74115_1101) periplasmic pilus chaperone family protein [E.coli laminin-binding fimbriae (ELF) (CVF824)] [Escherichia coli O157:H7 str. EC4115]				VFG045881 (ECO55CA74_05725) chaperone [E.coli laminin-binding fimbriae (ELF) (CVF824)] [Escherichia coli O55:H7 str. RM12579]	VFG046031 (ECP_0106) type IV pilin biogenesis protein [Hemorrhagic E.coli pilus (HCP) (CVF825)] [Escherichia coli 536]	VFG045993 (ECP_0107) hypothetical protein [Hemorrhagic E.coli pilus (HCP) (CVF825)] [Escherichia coli 536]	VFG045956 (ECP_0108) major pilin subunit [Hemorrhagic E.coli pilus (HCP) (CVF825)] [Escherichia coli 536]	VFG043545_gi:218560235_ (ECS88_3547) lipoprotein NlpI [NlpI (AI331)] [Escherichia coli O45:K1:H7 str. S88]												VFG042095_gi:15832966_ (ECs3712) hypothetical protein [ETT2 (SS017)] [Escherichia coli O157:H7 str. Sakai]	VFG046001 (ETEC_0103) protein transport protein HofB [Hemorrhagic E.coli pilus (HCP) (CVF825)] [Escherichia coli O78:H11:K80 str. H10407]	VFG045896 (ETEC_1007) periplasmic pilin chaperone [E.coli laminin-binding fimbriae (ELF) (CVF824)] [Escherichia coli O78:H11:K80 str. H10407]	VFG045912 (ETEC_1008) fimbrial outer membrane usher protein [E.coli laminin-binding fimbriae (ELF) (CVF824)] [Escherichia coli O78:H11:K80 str. H10407]	VFG045932 (ETEC_1011) fimbrial precursor [E.coli laminin-binding fimbriae (ELF) (CVF824)] [Escherichia coli O78:H11:K80 str. H10407]		VFG045931 (EcE24377A_1056) fimbrial protein [E.coli laminin-binding fimbriae (ELF) (CVF824)] [Escherichia coli E24377A]		VFG045926 (O3M_16610) fimbrial-like adhesin protein [E.coli laminin-binding fimbriae (ELF) (CVF824)] [Escherichia coli O104:H4 str. 2009EL-2050]	VFG045906 (O3M_16615) outer membrane usher protein [E.coli laminin-binding fimbriae (ELF) (CVF824)] [Escherichia coli O104:H4 str. 2009EL-2050]		VFG045950 (O3M_20925) major pilin subunit [Hemorrhagic E.coli pilus (HCP) (CVF825)] [Escherichia coli O104:H4 str. 2009EL-2050]	VFG045987 (O3M_20930) hypothetical protein [Hemorrhagic E.coli pilus (HCP) (CVF825)] [Escherichia coli O104:H4 str. 2009EL-2050]		VFG045897 (UMNK88_1094) chaperone protein FocC [E.coli laminin-binding fimbriae (ELF) (CVF824)] [Escherichia coli UMNK88]	VFG045913 (UMNK88_1095) outer membrane usher protein FimD [E.coli laminin-binding fimbriae (ELF) (CVF824)] [Escherichia coli UMNK88]	VFG045933 (UMNK88_1096) hypothetical protein [E.coli laminin-binding fimbriae (ELF) (CVF824)] [Escherichia coli UMNK88]
ECL05958	VFG046044 (APECO78_03970) type IV pilin biogenesis protein [Hemorrhagic E.coli pilus (HCP) (CVF825)] [Escherichia coli O78:H18 str. WS3294A]	VFG046007 (APECO78_03975) hypothetical protein [Hemorrhagic E.coli pilus (HCP) (CVF825)] [Escherichia coli O78:H18 str. WS3294A]	VFG045899 (APECO78_08685) periplasmic pilin chaperone [E.coli laminin-binding fimbriae (ELF) (CVF824)] [Escherichia coli O78:H18 str. WS3294A]	VFG045915 (APECO78_08690) outer membrane usher protein [E.coli laminin-binding fimbriae (ELF) (CVF824)] [Escherichia coli O78:H18 str. WS3294A]	VFG045935 (APECO78_08695) fimbrial-like adhesin protein [E.coli laminin-binding fimbriae (ELF) (CVF824)] [Escherichia coli O78:H18 str. WS3294A]	VFG045983 (CDCO157_0108) hypothetical protein [Hemorrhagic E.coli pilus (HCP) (CVF825)] [Escherichia coli O157:H7 str. Xuzhou21]	VFG045827 (EC958_1421) hemolysin E [Hemolysin/cytolysin A (CVF750)] [Escherichia coli O25b:H4-ST131]				VFG045884 (ECH74115_1101) periplasmic pilus chaperone family protein [E.coli laminin-binding fimbriae (ELF) (CVF824)] [Escherichia coli O157:H7 str. EC4115]				VFG045881 (ECO55CA74_05725) chaperone [E.coli laminin-binding fimbriae (ELF) (CVF824)] [Escherichia coli O55:H7 str. RM12579]	VFG046031 (ECP_0106) type IV pilin biogenesis protein [Hemorrhagic E.coli pilus (HCP) (CVF825)] [Escherichia coli 536]	VFG045993 (ECP_0107) hypothetical protein [Hemorrhagic E.coli pilus (HCP) (CVF825)] [Escherichia coli 536]	VFG045956 (ECP_0108) major pilin subunit [Hemorrhagic E.coli pilus (HCP) (CVF825)] [Escherichia coli 536]	VFG043545_gi:218560235_ (ECS88_3547) lipoprotein NlpI [NlpI (AI331)] [Escherichia coli O45:K1:H7 str. S88]												VFG042095_gi:15832966_ (ECs3712) hypothetical protein [ETT2 (SS017)] [Escherichia coli O157:H7 str. Sakai]	VFG046001 (ETEC_0103) protein transport protein HofB [Hemorrhagic E.coli pilus (HCP) (CVF825)] [Escherichia coli O78:H11:K80 str. H10407]	VFG045896 (ETEC_1007) periplasmic pilin chaperone [E.coli laminin-binding fimbriae (ELF) (CVF824)] [Escherichia coli O78:H11:K80 str. H10407]	VFG045912 (ETEC_1008) fimbrial outer membrane usher protein [E.coli laminin-binding fimbriae (ELF) (CVF824)] [Escherichia coli O78:H11:K80 str. H10407]	VFG045932 (ETEC_1011) fimbrial precursor [E.coli laminin-binding fimbriae (ELF) (CVF824)] [Escherichia coli O78:H11:K80 str. H10407]		VFG045931 (EcE24377A_1056) fimbrial protein [E.coli laminin-binding fimbriae (ELF) (CVF824)] [Escherichia coli E24377A]		VFG045926 (O3M_16610) fimbrial-like adhesin protein [E.coli laminin-binding fimbriae (ELF) (CVF824)] [Escherichia coli O104:H4 str. 2009EL-2050]	VFG045906 (O3M_16615) outer membrane usher protein [E.coli laminin-binding fimbriae (ELF) (CVF824)] [Escherichia coli O104:H4 str. 2009EL-2050]		VFG045950 (O3M_20925) major pilin subunit [Hemorrhagic E.coli pilus (HCP) (CVF825)] [Escherichia coli O104:H4 str. 2009EL-2050]	VFG045987 (O3M_20930) hypothetical protein [Hemorrhagic E.coli pilus (HCP) (CVF825)] [Escherichia coli O104:H4 str. 2009EL-2050]		VFG045897 (UMNK88_1094) chaperone protein FocC [E.coli laminin-binding fimbriae (ELF) (CVF824)] [Escherichia coli UMNK88]	VFG045913 (UMNK88_1095) outer membrane usher protein FimD [E.coli laminin-binding fimbriae (ELF) (CVF824)] [Escherichia coli UMNK88]	VFG045933 (UMNK88_1096) hypothetical protein [E.coli laminin-binding fimbriae (ELF) (CVF824)] [Escherichia coli UMNK88]
ECL06007	VFG046044 (APECO78_03970) type IV pilin biogenesis protein [Hemorrhagic E.coli pilus (HCP) (CVF825)] [Escherichia coli O78:H18 str. WS3294A]	VFG046007 (APECO78_03975) hypothetical protein [Hemorrhagic E.coli pilus (HCP) (CVF825)] [Escherichia coli O78:H18 str. WS3294A]	VFG045899 (APECO78_08685) periplasmic pilin chaperone [E.coli laminin-binding fimbriae (ELF) (CVF824)] [Escherichia coli O78:H18 str. WS3294A]	VFG045915 (APECO78_08690) outer membrane usher protein [E.coli laminin-binding fimbriae (ELF) (CVF824)] [Escherichia coli O78:H18 str. WS3294A]	VFG045935 (APECO78_08695) fimbrial-like adhesin protein [E.coli laminin-binding fimbriae (ELF) (CVF824)] [Escherichia coli O78:H18 str. WS3294A]	VFG045983 (CDCO157_0108) hypothetical protein [Hemorrhagic E.coli pilus (HCP) (CVF825)] [Escherichia coli O157:H7 str. Xuzhou21]	VFG045827 (EC958_1421) hemolysin E [Hemolysin/cytolysin A (CVF750)] [Escherichia coli O25b:H4-ST131]				VFG045884 (ECH74115_1101) periplasmic pilus chaperone family protein [E.coli laminin-binding fimbriae (ELF) (CVF824)] [Escherichia coli O157:H7 str. EC4115]				VFG045881 (ECO55CA74_05725) chaperone [E.coli laminin-binding fimbriae (ELF) (CVF824)] [Escherichia coli O55:H7 str. RM12579]	VFG046031 (ECP_0106) type IV pilin biogenesis protein [Hemorrhagic E.coli pilus (HCP) (CVF825)] [Escherichia coli 536]	VFG045993 (ECP_0107) hypothetical protein [Hemorrhagic E.coli pilus (HCP) (CVF825)] [Escherichia coli 536]	VFG045956 (ECP_0108) major pilin subunit [Hemorrhagic E.coli pilus (HCP) (CVF825)] [Escherichia coli 536]	VFG043545_gi:218560235_ (ECS88_3547) lipoprotein NlpI [NlpI (AI331)] [Escherichia coli O45:K1:H7 str. S88]												VFG042095_gi:15832966_ (ECs3712) hypothetical protein [ETT2 (SS017)] [Escherichia coli O157:H7 str. Sakai]	VFG046001 (ETEC_0103) protein transport protein HofB [Hemorrhagic E.coli pilus (HCP) (CVF825)] [Escherichia coli O78:H11:K80 str. H10407]	VFG045896 (ETEC_1007) periplasmic pilin chaperone [E.coli laminin-binding fimbriae (ELF) (CVF824)] [Escherichia coli O78:H11:K80 str. H10407]	VFG045912 (ETEC_1008) fimbrial outer membrane usher protein [E.coli laminin-binding fimbriae (ELF) (CVF824)] [Escherichia coli O78:H11:K80 str. H10407]	VFG045932 (ETEC_1011) fimbrial precursor [E.coli laminin-binding fimbriae (ELF) (CVF824)] [Escherichia coli O78:H11:K80 str. H10407]		VFG045931 (EcE24377A_1056) fimbrial protein [E.coli laminin-binding fimbriae (ELF) (CVF824)] [Escherichia coli E24377A]		VFG045926 (O3M_16610) fimbrial-like adhesin protein [E.coli laminin-binding fimbriae (ELF) (CVF824)] [Escherichia coli O104:H4 str. 2009EL-2050]	VFG045906 (O3M_16615) outer membrane usher protein [E.coli laminin-binding fimbriae (ELF) (CVF824)] [Escherichia coli O104:H4 str. 2009EL-2050]		VFG045950 (O3M_20925) major pilin subunit [Hemorrhagic E.coli pilus (HCP) (CVF825)] [Escherichia coli O104:H4 str. 2009EL-2050]	VFG045987 (O3M_20930) hypothetical protein [Hemorrhagic E.coli pilus (HCP) (CVF825)] [Escherichia coli O104:H4 str. 2009EL-2050]		VFG045897 (UMNK88_1094) chaperone protein FocC [E.coli laminin-binding fimbriae (ELF) (CVF824)] [Escherichia coli UMNK88]	VFG045913 (UMNK88_1095) outer membrane usher protein FimD [E.coli laminin-binding fimbriae (ELF) (CVF824)] [Escherichia coli UMNK88]	VFG045933 (UMNK88_1096) hypothetical protein [E.coli laminin-binding fimbriae (ELF) (CVF824)] [Escherichia coli UMNK88]
ECL07310	VFG046044 (APECO78_03970) type IV pilin biogenesis protein [Hemorrhagic E.coli pilus (HCP) (CVF825)] [Escherichia coli O78:H18 str. WS3294A]	VFG046007 (APECO78_03975) hypothetical protein [Hemorrhagic E.coli pilus (HCP) (CVF825)] [Escherichia coli O78:H18 str. WS3294A]	VFG045899 (APECO78_08685) periplasmic pilin chaperone [E.coli laminin-binding fimbriae (ELF) (CVF824)] [Escherichia coli O78:H18 str. WS3294A]	VFG045915 (APECO78_08690) outer membrane usher protein [E.coli laminin-binding fimbriae (ELF) (CVF824)] [Escherichia coli O78:H18 str. WS3294A]	VFG045935 (APECO78_08695) fimbrial-like adhesin protein [E.coli laminin-binding fimbriae (ELF) (CVF824)] [Escherichia coli O78:H18 str. WS3294A]	VFG045983 (CDCO157_0108) hypothetical protein [Hemorrhagic E.coli pilus (HCP) (CVF825)] [Escherichia coli O157:H7 str. Xuzhou21]	VFG045827 (EC958_1421) hemolysin E [Hemolysin/cytolysin A (CVF750)] [Escherichia coli O25b:H4-ST131]				VFG045884 (ECH74115_1101) periplasmic pilus chaperone family protein [E.coli laminin-binding fimbriae (ELF) (CVF824)] [Escherichia coli O157:H7 str. EC4115]				VFG045881 (ECO55CA74_05725) chaperone [E.coli laminin-binding fimbriae (ELF) (CVF824)] [Escherichia coli O55:H7 str. RM12579]	VFG046031 (ECP_0106) type IV pilin biogenesis protein [Hemorrhagic E.coli pilus (HCP) (CVF825)] [Escherichia coli 536]	VFG045993 (ECP_0107) hypothetical protein [Hemorrhagic E.coli pilus (HCP) (CVF825)] [Escherichia coli 536]	VFG045956 (ECP_0108) major pilin subunit [Hemorrhagic E.coli pilus (HCP) (CVF825)] [Escherichia coli 536]	VFG043545_gi:218560235_ (ECS88_3547) lipoprotein NlpI [NlpI (AI331)] [Escherichia coli O45:K1:H7 str. S88]												VFG042095_gi:15832966_ (ECs3712) hypothetical protein [ETT2 (SS017)] [Escherichia coli O157:H7 str. Sakai]	VFG046001 (ETEC_0103) protein transport protein HofB [Hemorrhagic E.coli pilus (HCP) (CVF825)] [Escherichia coli O78:H11:K80 str. H10407]	VFG045896 (ETEC_1007) periplasmic pilin chaperone [E.coli laminin-binding fimbriae (ELF) (CVF824)] [Escherichia coli O78:H11:K80 str. H10407]	VFG045912 (ETEC_1008) fimbrial outer membrane usher protein [E.coli laminin-binding fimbriae (ELF) (CVF824)] [Escherichia coli O78:H11:K80 str. H10407]	VFG045932 (ETEC_1011) fimbrial precursor [E.coli laminin-binding fimbriae (ELF) (CVF824)] [Escherichia coli O78:H11:K80 str. H10407]		VFG045931 (EcE24377A_1056) fimbrial protein [E.coli laminin-binding fimbriae (ELF) (CVF824)] [Escherichia coli E24377A]		VFG045926 (O3M_16610) fimbrial-like adhesin protein [E.coli laminin-binding fimbriae (ELF) (CVF824)] [Escherichia coli O104:H4 str. 2009EL-2050]	VFG045906 (O3M_16615) outer membrane usher protein [E.coli laminin-binding fimbriae (ELF) (CVF824)] [Escherichia coli O104:H4 str. 2009EL-2050]		VFG045950 (O3M_20925) major pilin subunit [Hemorrhagic E.coli pilus (HCP) (CVF825)] [Escherichia coli O104:H4 str. 2009EL-2050]	VFG045987 (O3M_20930) hypothetical protein [Hemorrhagic E.coli pilus (HCP) (CVF825)] [Escherichia coli O104:H4 str. 2009EL-2050]		VFG045897 (UMNK88_1094) chaperone protein FocC [E.coli laminin-binding fimbriae (ELF) (CVF824)] [Escherichia coli UMNK88]	VFG045913 (UMNK88_1095) outer membrane usher protein FimD [E.coli laminin-binding fimbriae (ELF) (CVF824)] [Escherichia coli UMNK88]	VFG045933 (UMNK88_1096) hypothetical protein [E.coli laminin-binding fimbriae (ELF) (CVF824)] [Escherichia coli UMNK88]
ECL07805	VFG046044 (APECO78_03970) type IV pilin biogenesis protein [Hemorrhagic E.coli pilus (HCP) (CVF825)] [Escherichia coli O78:H18 str. WS3294A]	VFG046007 (APECO78_03975) hypothetical protein [Hemorrhagic E.coli pilus (HCP) (CVF825)] [Escherichia coli O78:H18 str. WS3294A]	VFG045899 (APECO78_08685) periplasmic pilin chaperone [E.coli laminin-binding fimbriae (ELF) (CVF824)] [Escherichia coli O78:H18 str. WS3294A]	VFG045915 (APECO78_08690) outer membrane usher protein [E.coli laminin-binding fimbriae (ELF) (CVF824)] [Escherichia coli O78:H18 str. WS3294A]	VFG045935 (APECO78_08695) fimbrial-like adhesin protein [E.coli laminin-binding fimbriae (ELF) (CVF824)] [Escherichia coli O78:H18 str. WS3294A]	VFG045983 (CDCO157_0108) hypothetical protein [Hemorrhagic E.coli pilus (HCP) (CVF825)] [Escherichia coli O157:H7 str. Xuzhou21]	VFG045827 (EC958_1421) hemolysin E [Hemolysin/cytolysin A (CVF750)] [Escherichia coli O25b:H4-ST131]			VFG045862 (ECH74115_1100) fimbrial protein [E.coli laminin-binding fimbriae (ELF) (CVF824)] [Escherichia coli O157:H7 str. EC4115]	VFG045884 (ECH74115_1101) periplasmic pilus chaperone family protein [E.coli laminin-binding fimbriae (ELF) (CVF824)] [Escherichia coli O157:H7 str. EC4115]	VFG035720_gi:260842456_ (ECO103_0224) hypothetical protein [ACE T6SS (CVF736)] [Escherichia coli O103:H2 str. 12009]	VFG035721_gi:260866370_ (ECO111_0230) hypothetical protein [ACE T6SS (CVF736)] [Escherichia coli O111:H- str. 11128]	VFG045859 (ECO55CA74_05720) putative fimbrial-like adhesin protein [E.coli laminin-binding fimbriae (ELF) (CVF824)] [Escherichia coli O55:H7 str. RM12579]	VFG045881 (ECO55CA74_05725) chaperone [E.coli laminin-binding fimbriae (ELF) (CVF824)] [Escherichia coli O55:H7 str. RM12579]	VFG046031 (ECP_0106) type IV pilin biogenesis protein [Hemorrhagic E.coli pilus (HCP) (CVF825)] [Escherichia coli 536]	VFG045993 (ECP_0107) hypothetical protein [Hemorrhagic E.coli pilus (HCP) (CVF825)] [Escherichia coli 536]	VFG045956 (ECP_0108) major pilin subunit [Hemorrhagic E.coli pilus (HCP) (CVF825)] [Escherichia coli 536]	VFG043545_gi:218560235_ (ECS88_3547) lipoprotein NlpI [NlpI (AI331)] [Escherichia coli O45:K1:H7 str. S88]	VFG046082 (ECVR50_0238) hypothetical protein [ACE T6SS (CVF736)] [Escherichia coli VR50]	VFG046083 (ECVR50_0239) IcmF-related protein [ACE T6SS (CVF736)] [Escherichia coli VR50]	VFG046084 (ECVR50_0240) uncharacterized protein ImpA [ACE T6SS (CVF736)] [Escherichia coli VR50]	VFG046086 (ECVR50_0242) putative protease [ACE T6SS (CVF736)] [Escherichia coli VR50]	VFG046090 (ECVR50_0246) hypothetical protein [ACE T6SS (CVF736)] [Escherichia coli VR50]	VFG046091 (ECVR50_0247) hypothetical protein [ACE T6SS (CVF736)] [Escherichia coli VR50]	VFG046092 (ECVR50_0248) hypothetical protein [ACE T6SS (CVF736)] [Escherichia coli VR50]	VFG046093 (ECVR50_0249) hypothetical protein [ACE T6SS (CVF736)] [Escherichia coli VR50]	VFG046094 (ECVR50_0250) uncharacterized protein ImpC [ACE T6SS (CVF736)] [Escherichia coli VR50]	VFG046096 (ECVR50_0257) hypothetical protein [ACE T6SS (CVF736)] [Escherichia coli VR50]	VFG035711_gi:15829483_ (ECs0229) hypothetical protein [ACE T6SS (CVF736)] [Escherichia coli O157:H7 str. Sakai]	VFG042095_gi:15832966_ (ECs3712) hypothetical protein [ETT2 (SS017)] [Escherichia coli O157:H7 str. Sakai]	VFG046001 (ETEC_0103) protein transport protein HofB [Hemorrhagic E.coli pilus (HCP) (CVF825)] [Escherichia coli O78:H11:K80 str. H10407]	VFG045896 (ETEC_1007) periplasmic pilin chaperone [E.coli laminin-binding fimbriae (ELF) (CVF824)] [Escherichia coli O78:H11:K80 str. H10407]	VFG045912 (ETEC_1008) fimbrial outer membrane usher protein [E.coli laminin-binding fimbriae (ELF) (CVF824)] [Escherichia coli O78:H11:K80 str. H10407]	VFG045932 (ETEC_1011) fimbrial precursor [E.coli laminin-binding fimbriae (ELF) (CVF824)] [Escherichia coli O78:H11:K80 str. H10407]	VFG035728_gi:157155723_ (EcE24377A_0237) hypothetical protein [ACE T6SS (CVF736)] [Escherichia coli E24377A]	VFG045931 (EcE24377A_1056) fimbrial protein [E.coli laminin-binding fimbriae (ELF) (CVF824)] [Escherichia coli E24377A]	VFG035715_gi:291281048_ (G2583_0236) hypothetical protein [ACE T6SS (CVF736)] [Escherichia coli O55:H7 str. CB9615]	VFG045926 (O3M_16610) fimbrial-like adhesin protein [E.coli laminin-binding fimbriae (ELF) (CVF824)] [Escherichia coli O104:H4 str. 2009EL-2050]	VFG045906 (O3M_16615) outer membrane usher protein [E.coli laminin-binding fimbriae (ELF) (CVF824)] [Escherichia coli O104:H4 str. 2009EL-2050]	VFG035722_gi:410484142_ (O3M_20335) type VI secretion system protein ImpG [ACE T6SS (CVF736)] [Escherichia coli O104:H4 str. 2009EL-2050]	VFG045950 (O3M_20925) major pilin subunit [Hemorrhagic E.coli pilus (HCP) (CVF825)] [Escherichia coli O104:H4 str. 2009EL-2050]	VFG045987 (O3M_20930) hypothetical protein [Hemorrhagic E.coli pilus (HCP) (CVF825)] [Escherichia coli O104:H4 str. 2009EL-2050]	VFG045875 (UMNK88_1093) major type 1 subunit fimbrin FimA [E.coli laminin-binding fimbriae (ELF) (CVF824)] [Escherichia coli UMNK88]	VFG045897 (UMNK88_1094) chaperone protein FocC [E.coli laminin-binding fimbriae (ELF) (CVF824)] [Escherichia coli UMNK88]	VFG045913 (UMNK88_1095) outer membrane usher protein FimD [E.coli laminin-binding fimbriae (ELF) (CVF824)] [Escherichia coli UMNK88]	VFG045933 (UMNK88_1096) hypothetical protein [E.coli laminin-binding fimbriae (ELF) (CVF824)] [Escherichia coli UMNK88]	VFG035729_gi:386612389_ (UMNK88_238) hypothetical protein [ACE T6SS (CVF736)] [Escherichia coli UMNK88]	VFG035710_gi:15799909_ (Z0260) hypothetical protein [EHS (SS185)] [Escherichia coli O157:H7 str. EDL933]
ECL08334	VFG046044 (APECO78_03970) type IV pilin biogenesis protein [Hemorrhagic E.coli pilus (HCP) (CVF825)] [Escherichia coli O78:H18 str. WS3294A]	VFG046007 (APECO78_03975) hypothetical protein [Hemorrhagic E.coli pilus (HCP) (CVF825)] [Escherichia coli O78:H18 str. WS3294A]	VFG045899 (APECO78_08685) periplasmic pilin chaperone [E.coli laminin-binding fimbriae (ELF) (CVF824)] [Escherichia coli O78:H18 str. WS3294A]	VFG045915 (APECO78_08690) outer membrane usher protein [E.coli laminin-binding fimbriae (ELF) (CVF824)] [Escherichia coli O78:H18 str. WS3294A]	VFG045935 (APECO78_08695) fimbrial-like adhesin protein [E.coli laminin-binding fimbriae (ELF) (CVF824)] [Escherichia coli O78:H18 str. WS3294A]	VFG045983 (CDCO157_0108) hypothetical protein [Hemorrhagic E.coli pilus (HCP) (CVF825)] [Escherichia coli O157:H7 str. Xuzhou21]	VFG045827 (EC958_1421) hemolysin E [Hemolysin/cytolysin A (CVF750)] [Escherichia coli O25b:H4-ST131]				VFG045884 (ECH74115_1101) periplasmic pilus chaperone family protein [E.coli laminin-binding fimbriae (ELF) (CVF824)] [Escherichia coli O157:H7 str. EC4115]				VFG045881 (ECO55CA74_05725) chaperone [E.coli laminin-binding fimbriae (ELF) (CVF824)] [Escherichia coli O55:H7 str. RM12579]	VFG046031 (ECP_0106) type IV pilin biogenesis protein [Hemorrhagic E.coli pilus (HCP) (CVF825)] [Escherichia coli 536]	VFG045993 (ECP_0107) hypothetical protein [Hemorrhagic E.coli pilus (HCP) (CVF825)] [Escherichia coli 536]	VFG045956 (ECP_0108) major pilin subunit [Hemorrhagic E.coli pilus (HCP) (CVF825)] [Escherichia coli 536]	VFG043545_gi:218560235_ (ECS88_3547) lipoprotein NlpI [NlpI (AI331)] [Escherichia coli O45:K1:H7 str. S88]												VFG042095_gi:15832966_ (ECs3712) hypothetical protein [ETT2 (SS017)] [Escherichia coli O157:H7 str. Sakai]	VFG046001 (ETEC_0103) protein transport protein HofB [Hemorrhagic E.coli pilus (HCP) (CVF825)] [Escherichia coli O78:H11:K80 str. H10407]	VFG045896 (ETEC_1007) periplasmic pilin chaperone [E.coli laminin-binding fimbriae (ELF) (CVF824)] [Escherichia coli O78:H11:K80 str. H10407]	VFG045912 (ETEC_1008) fimbrial outer membrane usher protein [E.coli laminin-binding fimbriae (ELF) (CVF824)] [Escherichia coli O78:H11:K80 str. H10407]	VFG045932 (ETEC_1011) fimbrial precursor [E.coli laminin-binding fimbriae (ELF) (CVF824)] [Escherichia coli O78:H11:K80 str. H10407]		VFG045931 (EcE24377A_1056) fimbrial protein [E.coli laminin-binding fimbriae (ELF) (CVF824)] [Escherichia coli E24377A]		VFG045926 (O3M_16610) fimbrial-like adhesin protein [E.coli laminin-binding fimbriae (ELF) (CVF824)] [Escherichia coli O104:H4 str. 2009EL-2050]	VFG045906 (O3M_16615) outer membrane usher protein [E.coli laminin-binding fimbriae (ELF) (CVF824)] [Escherichia coli O104:H4 str. 2009EL-2050]		VFG045950 (O3M_20925) major pilin subunit [Hemorrhagic E.coli pilus (HCP) (CVF825)] [Escherichia coli O104:H4 str. 2009EL-2050]	VFG045987 (O3M_20930) hypothetical protein [Hemorrhagic E.coli pilus (HCP) (CVF825)] [Escherichia coli O104:H4 str. 2009EL-2050]		VFG045897 (UMNK88_1094) chaperone protein FocC [E.coli laminin-binding fimbriae (ELF) (CVF824)] [Escherichia coli UMNK88]	VFG045913 (UMNK88_1095) outer membrane usher protein FimD [E.coli laminin-binding fimbriae (ELF) (CVF824)] [Escherichia coli UMNK88]	VFG045933 (UMNK88_1096) hypothetical protein [E.coli laminin-binding fimbriae (ELF) (CVF824)] [Escherichia coli UMNK88]
ECL08786	VFG046044 (APECO78_03970) type IV pilin biogenesis protein [Hemorrhagic E.coli pilus (HCP) (CVF825)] [Escherichia coli O78:H18 str. WS3294A]	VFG046007 (APECO78_03975) hypothetical protein [Hemorrhagic E.coli pilus (HCP) (CVF825)] [Escherichia coli O78:H18 str. WS3294A]	VFG045899 (APECO78_08685) periplasmic pilin chaperone [E.coli laminin-binding fimbriae (ELF) (CVF824)] [Escherichia coli O78:H18 str. WS3294A]	VFG045915 (APECO78_08690) outer membrane usher protein [E.coli laminin-binding fimbriae (ELF) (CVF824)] [Escherichia coli O78:H18 str. WS3294A]	VFG045935 (APECO78_08695) fimbrial-like adhesin protein [E.coli laminin-binding fimbriae (ELF) (CVF824)] [Escherichia coli O78:H18 str. WS3294A]	VFG045983 (CDCO157_0108) hypothetical protein [Hemorrhagic E.coli pilus (HCP) (CVF825)] [Escherichia coli O157:H7 str. Xuzhou21]	VFG045827 (EC958_1421) hemolysin E [Hemolysin/cytolysin A (CVF750)] [Escherichia coli O25b:H4-ST131]				VFG045884 (ECH74115_1101) periplasmic pilus chaperone family protein [E.coli laminin-binding fimbriae (ELF) (CVF824)] [Escherichia coli O157:H7 str. EC4115]				VFG045881 (ECO55CA74_05725) chaperone [E.coli laminin-binding fimbriae (ELF) (CVF824)] [Escherichia coli O55:H7 str. RM12579]	VFG046031 (ECP_0106) type IV pilin biogenesis protein [Hemorrhagic E.coli pilus (HCP) (CVF825)] [Escherichia coli 536]	VFG045993 (ECP_0107) hypothetical protein [Hemorrhagic E.coli pilus (HCP) (CVF825)] [Escherichia coli 536]	VFG045956 (ECP_0108) major pilin subunit [Hemorrhagic E.coli pilus (HCP) (CVF825)] [Escherichia coli 536]	VFG043545_gi:218560235_ (ECS88_3547) lipoprotein NlpI [NlpI (AI331)] [Escherichia coli O45:K1:H7 str. S88]												VFG042095_gi:15832966_ (ECs3712) hypothetical protein [ETT2 (SS017)] [Escherichia coli O157:H7 str. Sakai]	VFG046001 (ETEC_0103) protein transport protein HofB [Hemorrhagic E.coli pilus (HCP) (CVF825)] [Escherichia coli O78:H11:K80 str. H10407]	VFG045896 (ETEC_1007) periplasmic pilin chaperone [E.coli laminin-binding fimbriae (ELF) (CVF824)] [Escherichia coli O78:H11:K80 str. H10407]	VFG045912 (ETEC_1008) fimbrial outer membrane usher protein [E.coli laminin-binding fimbriae (ELF) (CVF824)] [Escherichia coli O78:H11:K80 str. H10407]	VFG045932 (ETEC_1011) fimbrial precursor [E.coli laminin-binding fimbriae (ELF) (CVF824)] [Escherichia coli O78:H11:K80 str. H10407]		VFG045931 (EcE24377A_1056) fimbrial protein [E.coli laminin-binding fimbriae (ELF) (CVF824)] [Escherichia coli E24377A]		VFG045926 (O3M_16610) fimbrial-like adhesin protein [E.coli laminin-binding fimbriae (ELF) (CVF824)] [Escherichia coli O104:H4 str. 2009EL-2050]	VFG045906 (O3M_16615) outer membrane usher protein [E.coli laminin-binding fimbriae (ELF) (CVF824)] [Escherichia coli O104:H4 str. 2009EL-2050]		VFG045950 (O3M_20925) major pilin subunit [Hemorrhagic E.coli pilus (HCP) (CVF825)] [Escherichia coli O104:H4 str. 2009EL-2050]	VFG045987 (O3M_20930) hypothetical protein [Hemorrhagic E.coli pilus (HCP) (CVF825)] [Escherichia coli O104:H4 str. 2009EL-2050]		VFG045897 (UMNK88_1094) chaperone protein FocC [E.coli laminin-binding fimbriae (ELF) (CVF824)] [Escherichia coli UMNK88]	VFG045913 (UMNK88_1095) outer membrane usher protein FimD [E.coli laminin-binding fimbriae (ELF) (CVF824)] [Escherichia coli UMNK88]	VFG045933 (UMNK88_1096) hypothetical protein [E.coli laminin-binding fimbriae (ELF) (CVF824)] [Escherichia coli UMNK88]
ECL09114	VFG046044 (APECO78_03970) type IV pilin biogenesis protein [Hemorrhagic E.coli pilus (HCP) (CVF825)] [Escherichia coli O78:H18 str. WS3294A]	VFG046007 (APECO78_03975) hypothetical protein [Hemorrhagic E.coli pilus (HCP) (CVF825)] [Escherichia coli O78:H18 str. WS3294A]	VFG045899 (APECO78_08685) periplasmic pilin chaperone [E.coli laminin-binding fimbriae (ELF) (CVF824)] [Escherichia coli O78:H18 str. WS3294A]	VFG045915 (APECO78_08690) outer membrane usher protein [E.coli laminin-binding fimbriae (ELF) (CVF824)] [Escherichia coli O78:H18 str. WS3294A]	VFG045935 (APECO78_08695) fimbrial-like adhesin protein [E.coli laminin-binding fimbriae (ELF) (CVF824)] [Escherichia coli O78:H18 str. WS3294A]	VFG045983 (CDCO157_0108) hypothetical protein [Hemorrhagic E.coli pilus (HCP) (CVF825)] [Escherichia coli O157:H7 str. Xuzhou21]	VFG045827 (EC958_1421) hemolysin E [Hemolysin/cytolysin A (CVF750)] [Escherichia coli O25b:H4-ST131]	VFG045820 (EC958_4121) putative autotransporter [AIDA-I (CVF450)] [Escherichia coli O25b:H4-ST131]	VFG045826 (EC958_5138) Fluffing protein [Cah, AIDA-I type (CVF745)] [Escherichia coli O25b:H4-ST131]	VFG045862 (ECH74115_1100) fimbrial protein [E.coli laminin-binding fimbriae (ELF) (CVF824)] [Escherichia coli O157:H7 str. EC4115]	VFG045884 (ECH74115_1101) periplasmic pilus chaperone family protein [E.coli laminin-binding fimbriae (ELF) (CVF824)] [Escherichia coli O157:H7 str. EC4115]	VFG035720_gi:260842456_ (ECO103_0224) hypothetical protein [ACE T6SS (CVF736)] [Escherichia coli O103:H2 str. 12009]	VFG035721_gi:260866370_ (ECO111_0230) hypothetical protein [ACE T6SS (CVF736)] [Escherichia coli O111:H- str. 11128]	VFG045859 (ECO55CA74_05720) putative fimbrial-like adhesin protein [E.coli laminin-binding fimbriae (ELF) (CVF824)] [Escherichia coli O55:H7 str. RM12579]	VFG045881 (ECO55CA74_05725) chaperone [E.coli laminin-binding fimbriae (ELF) (CVF824)] [Escherichia coli O55:H7 str. RM12579]	VFG046031 (ECP_0106) type IV pilin biogenesis protein [Hemorrhagic E.coli pilus (HCP) (CVF825)] [Escherichia coli 536]	VFG045993 (ECP_0107) hypothetical protein [Hemorrhagic E.coli pilus (HCP) (CVF825)] [Escherichia coli 536]	VFG045956 (ECP_0108) major pilin subunit [Hemorrhagic E.coli pilus (HCP) (CVF825)] [Escherichia coli 536]	VFG043545_gi:218560235_ (ECS88_3547) lipoprotein NlpI [NlpI (AI331)] [Escherichia coli O45:K1:H7 str. S88]	VFG046082 (ECVR50_0238) hypothetical protein [ACE T6SS (CVF736)] [Escherichia coli VR50]	VFG046083 (ECVR50_0239) IcmF-related protein [ACE T6SS (CVF736)] [Escherichia coli VR50]	VFG046084 (ECVR50_0240) uncharacterized protein ImpA [ACE T6SS (CVF736)] [Escherichia coli VR50]	VFG046086 (ECVR50_0242) putative protease [ACE T6SS (CVF736)] [Escherichia coli VR50]	VFG046090 (ECVR50_0246) hypothetical protein [ACE T6SS (CVF736)] [Escherichia coli VR50]	VFG046091 (ECVR50_0247) hypothetical protein [ACE T6SS (CVF736)] [Escherichia coli VR50]	VFG046092 (ECVR50_0248) hypothetical protein [ACE T6SS (CVF736)] [Escherichia coli VR50]	VFG046093 (ECVR50_0249) hypothetical protein [ACE T6SS (CVF736)] [Escherichia coli VR50]	VFG046094 (ECVR50_0250) uncharacterized protein ImpC [ACE T6SS (CVF736)] [Escherichia coli VR50]	VFG046096 (ECVR50_0257) hypothetical protein [ACE T6SS (CVF736)] [Escherichia coli VR50]	VFG035711_gi:15829483_ (ECs0229) hypothetical protein [ACE T6SS (CVF736)] [Escherichia coli O157:H7 str. Sakai]	VFG042095_gi:15832966_ (ECs3712) hypothetical protein [ETT2 (SS017)] [Escherichia coli O157:H7 str. Sakai]	VFG046001 (ETEC_0103) protein transport protein HofB [Hemorrhagic E.coli pilus (HCP) (CVF825)] [Escherichia coli O78:H11:K80 str. H10407]	VFG045896 (ETEC_1007) periplasmic pilin chaperone [E.coli laminin-binding fimbriae (ELF) (CVF824)] [Escherichia coli O78:H11:K80 str. H10407]	VFG045912 (ETEC_1008) fimbrial outer membrane usher protein [E.coli laminin-binding fimbriae (ELF) (CVF824)] [Escherichia coli O78:H11:K80 str. H10407]	VFG045932 (ETEC_1011) fimbrial precursor [E.coli laminin-binding fimbriae (ELF) (CVF824)] [Escherichia coli O78:H11:K80 str. H10407]	VFG035728_gi:157155723_ (EcE24377A_0237) hypothetical protein [ACE T6SS (CVF736)] [Escherichia coli E24377A]	VFG045931 (EcE24377A_1056) fimbrial protein [E.coli laminin-binding fimbriae (ELF) (CVF824)] [Escherichia coli E24377A]	VFG035715_gi:291281048_ (G2583_0236) hypothetical protein [ACE T6SS (CVF736)] [Escherichia coli O55:H7 str. CB9615]	VFG045926 (O3M_16610) fimbrial-like adhesin protein [E.coli laminin-binding fimbriae (ELF) (CVF824)] [Escherichia coli O104:H4 str. 2009EL-2050]	VFG045906 (O3M_16615) outer membrane usher protein [E.coli laminin-binding fimbriae (ELF) (CVF824)] [Escherichia coli O104:H4 str. 2009EL-2050]	VFG035722_gi:410484142_ (O3M_20335) type VI secretion system protein ImpG [ACE T6SS (CVF736)] [Escherichia coli O104:H4 str. 2009EL-2050]	VFG045950 (O3M_20925) major pilin subunit [Hemorrhagic E.coli pilus (HCP) (CVF825)] [Escherichia coli O104:H4 str. 2009EL-2050]	VFG045987 (O3M_20930) hypothetical protein [Hemorrhagic E.coli pilus (HCP) (CVF825)] [Escherichia coli O104:H4 str. 2009EL-2050]	VFG045875 (UMNK88_1093) major type 1 subunit fimbrin FimA [E.coli laminin-binding fimbriae (ELF) (CVF824)] [Escherichia coli UMNK88]	VFG045897 (UMNK88_1094) chaperone protein FocC [E.coli laminin-binding fimbriae (ELF) (CVF824)] [Escherichia coli UMNK88]	VFG045913 (UMNK88_1095) outer membrane usher protein FimD [E.coli laminin-binding fimbriae (ELF) (CVF824)] [Escherichia coli UMNK88]	VFG045933 (UMNK88_1096) hypothetical protein [E.coli laminin-binding fimbriae (ELF) (CVF824)] [Escherichia coli UMNK88]	VFG035729_gi:386612389_ (UMNK88_238) hypothetical protein [ACE T6SS (CVF736)] [Escherichia coli UMNK88]	VFG035710_gi:15799909_ (Z0260) hypothetical protein [EHS (SS185)] [Escherichia coli O157:H7 str. EDL933]
ECL09646	VFG046044 (APECO78_03970) type IV pilin biogenesis protein [Hemorrhagic E.coli pilus (HCP) (CVF825)] [Escherichia coli O78:H18 str. WS3294A]	VFG046007 (APECO78_03975) hypothetical protein [Hemorrhagic E.coli pilus (HCP) (CVF825)] [Escherichia coli O78:H18 str. WS3294A]	VFG045899 (APECO78_08685) periplasmic pilin chaperone [E.coli laminin-binding fimbriae (ELF) (CVF824)] [Escherichia coli O78:H18 str. WS3294A]	VFG045915 (APECO78_08690) outer membrane usher protein [E.coli laminin-binding fimbriae (ELF) (CVF824)] [Escherichia coli O78:H18 str. WS3294A]	VFG045935 (APECO78_08695) fimbrial-like adhesin protein [E.coli laminin-binding fimbriae (ELF) (CVF824)] [Escherichia coli O78:H18 str. WS3294A]	VFG045983 (CDCO157_0108) hypothetical protein [Hemorrhagic E.coli pilus (HCP) (CVF825)] [Escherichia coli O157:H7 str. Xuzhou21]	VFG045827 (EC958_1421) hemolysin E [Hemolysin/cytolysin A (CVF750)] [Escherichia coli O25b:H4-ST131]			VFG045862 (ECH74115_1100) fimbrial protein [E.coli laminin-binding fimbriae (ELF) (CVF824)] [Escherichia coli O157:H7 str. EC4115]	VFG045884 (ECH74115_1101) periplasmic pilus chaperone family protein [E.coli laminin-binding fimbriae (ELF) (CVF824)] [Escherichia coli O157:H7 str. EC4115]	VFG035720_gi:260842456_ (ECO103_0224) hypothetical protein [ACE T6SS (CVF736)] [Escherichia coli O103:H2 str. 12009]	VFG035721_gi:260866370_ (ECO111_0230) hypothetical protein [ACE T6SS (CVF736)] [Escherichia coli O111:H- str. 11128]	VFG045859 (ECO55CA74_05720) putative fimbrial-like adhesin protein [E.coli laminin-binding fimbriae (ELF) (CVF824)] [Escherichia coli O55:H7 str. RM12579]	VFG045881 (ECO55CA74_05725) chaperone [E.coli laminin-binding fimbriae (ELF) (CVF824)] [Escherichia coli O55:H7 str. RM12579]	VFG046031 (ECP_0106) type IV pilin biogenesis protein [Hemorrhagic E.coli pilus (HCP) (CVF825)] [Escherichia coli 536]	VFG045993 (ECP_0107) hypothetical protein [Hemorrhagic E.coli pilus (HCP) (CVF825)] [Escherichia coli 536]	VFG045956 (ECP_0108) major pilin subunit [Hemorrhagic E.coli pilus (HCP) (CVF825)] [Escherichia coli 536]	VFG043545_gi:218560235_ (ECS88_3547) lipoprotein NlpI [NlpI (AI331)] [Escherichia coli O45:K1:H7 str. S88]	VFG046082 (ECVR50_0238) hypothetical protein [ACE T6SS (CVF736)] [Escherichia coli VR50]	VFG046083 (ECVR50_0239) IcmF-related protein [ACE T6SS (CVF736)] [Escherichia coli VR50]	VFG046084 (ECVR50_0240) uncharacterized protein ImpA [ACE T6SS (CVF736)] [Escherichia coli VR50]	VFG046086 (ECVR50_0242) putative protease [ACE T6SS (CVF736)] [Escherichia coli VR50]	VFG046090 (ECVR50_0246) hypothetical protein [ACE T6SS (CVF736)] [Escherichia coli VR50]	VFG046091 (ECVR50_0247) hypothetical protein [ACE T6SS (CVF736)] [Escherichia coli VR50]	VFG046092 (ECVR50_0248) hypothetical protein [ACE T6SS (CVF736)] [Escherichia coli VR50]	VFG046093 (ECVR50_0249) hypothetical protein [ACE T6SS (CVF736)] [Escherichia coli VR50]	VFG046094 (ECVR50_0250) uncharacterized protein ImpC [ACE T6SS (CVF736)] [Escherichia coli VR50]	VFG046096 (ECVR50_0257) hypothetical protein [ACE T6SS (CVF736)] [Escherichia coli VR50]	VFG035711_gi:15829483_ (ECs0229) hypothetical protein [ACE T6SS (CVF736)] [Escherichia coli O157:H7 str. Sakai]	VFG042095_gi:15832966_ (ECs3712) hypothetical protein [ETT2 (SS017)] [Escherichia coli O157:H7 str. Sakai]	VFG046001 (ETEC_0103) protein transport protein HofB [Hemorrhagic E.coli pilus (HCP) (CVF825)] [Escherichia coli O78:H11:K80 str. H10407]	VFG045896 (ETEC_1007) periplasmic pilin chaperone [E.coli laminin-binding fimbriae (ELF) (CVF824)] [Escherichia coli O78:H11:K80 str. H10407]	VFG045912 (ETEC_1008) fimbrial outer membrane usher protein [E.coli laminin-binding fimbriae (ELF) (CVF824)] [Escherichia coli O78:H11:K80 str. H10407]	VFG045932 (ETEC_1011) fimbrial precursor [E.coli laminin-binding fimbriae (ELF) (CVF824)] [Escherichia coli O78:H11:K80 str. H10407]	VFG035728_gi:157155723_ (EcE24377A_0237) hypothetical protein [ACE T6SS (CVF736)] [Escherichia coli E24377A]	VFG045931 (EcE24377A_1056) fimbrial protein [E.coli laminin-binding fimbriae (ELF) (CVF824)] [Escherichia coli E24377A]	VFG035715_gi:291281048_ (G2583_0236) hypothetical protein [ACE T6SS (CVF736)] [Escherichia coli O55:H7 str. CB9615]	VFG045926 (O3M_16610) fimbrial-like adhesin protein [E.coli laminin-binding fimbriae (ELF) (CVF824)] [Escherichia coli O104:H4 str. 2009EL-2050]	VFG045906 (O3M_16615) outer membrane usher protein [E.coli laminin-binding fimbriae (ELF) (CVF824)] [Escherichia coli O104:H4 str. 2009EL-2050]	VFG035722_gi:410484142_ (O3M_20335) type VI secretion system protein ImpG [ACE T6SS (CVF736)] [Escherichia coli O104:H4 str. 2009EL-2050]	VFG045950 (O3M_20925) major pilin subunit [Hemorrhagic E.coli pilus (HCP) (CVF825)] [Escherichia coli O104:H4 str. 2009EL-2050]	VFG045987 (O3M_20930) hypothetical protein [Hemorrhagic E.coli pilus (HCP) (CVF825)] [Escherichia coli O104:H4 str. 2009EL-2050]	VFG045875 (UMNK88_1093) major type 1 subunit fimbrin FimA [E.coli laminin-binding fimbriae (ELF) (CVF824)] [Escherichia coli UMNK88]	VFG045897 (UMNK88_1094) chaperone protein FocC [E.coli laminin-binding fimbriae (ELF) (CVF824)] [Escherichia coli UMNK88]	VFG045913 (UMNK88_1095) outer membrane usher protein FimD [E.coli laminin-binding fimbriae (ELF) (CVF824)] [Escherichia coli UMNK88]	VFG045933 (UMNK88_1096) hypothetical protein [E.coli laminin-binding fimbriae (ELF) (CVF824)] [Escherichia coli UMNK88]	VFG035729_gi:386612389_ (UMNK88_238) hypothetical protein [ACE T6SS (CVF736)] [Escherichia coli UMNK88]	VFG035710_gi:15799909_ (Z0260) hypothetical protein [EHS (SS185)] [Escherichia coli O157:H7 str. EDL933]
ECL10170	VFG046044 (APECO78_03970) type IV pilin biogenesis protein [Hemorrhagic E.coli pilus (HCP) (CVF825)] [Escherichia coli O78:H18 str. WS3294A]	VFG046007 (APECO78_03975) hypothetical protein [Hemorrhagic E.coli pilus (HCP) (CVF825)] [Escherichia coli O78:H18 str. WS3294A]	VFG045899 (APECO78_08685) periplasmic pilin chaperone [E.coli laminin-binding fimbriae (ELF) (CVF824)] [Escherichia coli O78:H18 str. WS3294A]	VFG045915 (APECO78_08690) outer membrane usher protein [E.coli laminin-binding fimbriae (ELF) (CVF824)] [Escherichia coli O78:H18 str. WS3294A]	VFG045935 (APECO78_08695) fimbrial-like adhesin protein [E.coli laminin-binding fimbriae (ELF) (CVF824)] [Escherichia coli O78:H18 str. WS3294A]	VFG045983 (CDCO157_0108) hypothetical protein [Hemorrhagic E.coli pilus (HCP) (CVF825)] [Escherichia coli O157:H7 str. Xuzhou21]	VFG045827 (EC958_1421) hemolysin E [Hemolysin/cytolysin A (CVF750)] [Escherichia coli O25b:H4-ST131]	VFG045820 (EC958_4121) putative autotransporter [AIDA-I (CVF450)] [Escherichia coli O25b:H4-ST131]	VFG045826 (EC958_5138) Fluffing protein [Cah, AIDA-I type (CVF745)] [Escherichia coli O25b:H4-ST131]	VFG045862 (ECH74115_1100) fimbrial protein [E.coli laminin-binding fimbriae (ELF) (CVF824)] [Escherichia coli O157:H7 str. EC4115]	VFG045884 (ECH74115_1101) periplasmic pilus chaperone family protein [E.coli laminin-binding fimbriae (ELF) (CVF824)] [Escherichia coli O157:H7 str. EC4115]	VFG035720_gi:260842456_ (ECO103_0224) hypothetical protein [ACE T6SS (CVF736)] [Escherichia coli O103:H2 str. 12009]	VFG035721_gi:260866370_ (ECO111_0230) hypothetical protein [ACE T6SS (CVF736)] [Escherichia coli O111:H- str. 11128]	VFG045859 (ECO55CA74_05720) putative fimbrial-like adhesin protein [E.coli laminin-binding fimbriae (ELF) (CVF824)] [Escherichia coli O55:H7 str. RM12579]	VFG045881 (ECO55CA74_05725) chaperone [E.coli laminin-binding fimbriae (ELF) (CVF824)] [Escherichia coli O55:H7 str. RM12579]	VFG046031 (ECP_0106) type IV pilin biogenesis protein [Hemorrhagic E.coli pilus (HCP) (CVF825)] [Escherichia coli 536]	VFG045993 (ECP_0107) hypothetical protein [Hemorrhagic E.coli pilus (HCP) (CVF825)] [Escherichia coli 536]	VFG045956 (ECP_0108) major pilin subunit [Hemorrhagic E.coli pilus (HCP) (CVF825)] [Escherichia coli 536]	VFG043545_gi:218560235_ (ECS88_3547) lipoprotein NlpI [NlpI (AI331)] [Escherichia coli O45:K1:H7 str. S88]	VFG046082 (ECVR50_0238) hypothetical protein [ACE T6SS (CVF736)] [Escherichia coli VR50]	VFG046083 (ECVR50_0239) IcmF-related protein [ACE T6SS (CVF736)] [Escherichia coli VR50]	VFG046084 (ECVR50_0240) uncharacterized protein ImpA [ACE T6SS (CVF736)] [Escherichia coli VR50]	VFG046086 (ECVR50_0242) putative protease [ACE T6SS (CVF736)] [Escherichia coli VR50]	VFG046090 (ECVR50_0246) hypothetical protein [ACE T6SS (CVF736)] [Escherichia coli VR50]	VFG046091 (ECVR50_0247) hypothetical protein [ACE T6SS (CVF736)] [Escherichia coli VR50]	VFG046092 (ECVR50_0248) hypothetical protein [ACE T6SS (CVF736)] [Escherichia coli VR50]	VFG046093 (ECVR50_0249) hypothetical protein [ACE T6SS (CVF736)] [Escherichia coli VR50]	VFG046094 (ECVR50_0250) uncharacterized protein ImpC [ACE T6SS (CVF736)] [Escherichia coli VR50]	VFG046096 (ECVR50_0257) hypothetical protein [ACE T6SS (CVF736)] [Escherichia coli VR50]	VFG035711_gi:15829483_ (ECs0229) hypothetical protein [ACE T6SS (CVF736)] [Escherichia coli O157:H7 str. Sakai]	VFG042095_gi:15832966_ (ECs3712) hypothetical protein [ETT2 (SS017)] [Escherichia coli O157:H7 str. Sakai]	VFG046001 (ETEC_0103) protein transport protein HofB [Hemorrhagic E.coli pilus (HCP) (CVF825)] [Escherichia coli O78:H11:K80 str. H10407]	VFG045896 (ETEC_1007) periplasmic pilin chaperone [E.coli laminin-binding fimbriae (ELF) (CVF824)] [Escherichia coli O78:H11:K80 str. H10407]	VFG045912 (ETEC_1008) fimbrial outer membrane usher protein [E.coli laminin-binding fimbriae (ELF) (CVF824)] [Escherichia coli O78:H11:K80 str. H10407]	VFG045932 (ETEC_1011) fimbrial precursor [E.coli laminin-binding fimbriae (ELF) (CVF824)] [Escherichia coli O78:H11:K80 str. H10407]	VFG035728_gi:157155723_ (EcE24377A_0237) hypothetical protein [ACE T6SS (CVF736)] [Escherichia coli E24377A]	VFG045931 (EcE24377A_1056) fimbrial protein [E.coli laminin-binding fimbriae (ELF) (CVF824)] [Escherichia coli E24377A]	VFG035715_gi:291281048_ (G2583_0236) hypothetical protein [ACE T6SS (CVF736)] [Escherichia coli O55:H7 str. CB9615]	VFG045926 (O3M_16610) fimbrial-like adhesin protein [E.coli laminin-binding fimbriae (ELF) (CVF824)] [Escherichia coli O104:H4 str. 2009EL-2050]	VFG045906 (O3M_16615) outer membrane usher protein [E.coli laminin-binding fimbriae (ELF) (CVF824)] [Escherichia coli O104:H4 str. 2009EL-2050]	VFG035722_gi:410484142_ (O3M_20335) type VI secretion system protein ImpG [ACE T6SS (CVF736)] [Escherichia coli O104:H4 str. 2009EL-2050]	VFG045950 (O3M_20925) major pilin subunit [Hemorrhagic E.coli pilus (HCP) (CVF825)] [Escherichia coli O104:H4 str. 2009EL-2050]	VFG045987 (O3M_20930) hypothetical protein [Hemorrhagic E.coli pilus (HCP) (CVF825)] [Escherichia coli O104:H4 str. 2009EL-2050]	VFG045875 (UMNK88_1093) major type 1 subunit fimbrin FimA [E.coli laminin-binding fimbriae (ELF) (CVF824)] [Escherichia coli UMNK88]	VFG045897 (UMNK88_1094) chaperone protein FocC [E.coli laminin-binding fimbriae (ELF) (CVF824)] [Escherichia coli UMNK88]	VFG045913 (UMNK88_1095) outer membrane usher protein FimD [E.coli laminin-binding fimbriae (ELF) (CVF824)] [Escherichia coli UMNK88]	VFG045933 (UMNK88_1096) hypothetical protein [E.coli laminin-binding fimbriae (ELF) (CVF824)] [Escherichia coli UMNK88]	VFG035729_gi:386612389_ (UMNK88_238) hypothetical protein [ACE T6SS (CVF736)] [Escherichia coli UMNK88]	VFG035710_gi:15799909_ (Z0260) hypothetical protein [EHS (SS185)] [Escherichia coli O157:H7 str. EDL933]
ECL10647	VFG046044 (APECO78_03970) type IV pilin biogenesis protein [Hemorrhagic E.coli pilus (HCP) (CVF825)] [Escherichia coli O78:H18 str. WS3294A]	VFG046007 (APECO78_03975) hypothetical protein [Hemorrhagic E.coli pilus (HCP) (CVF825)] [Escherichia coli O78:H18 str. WS3294A]	VFG045899 (APECO78_08685) periplasmic pilin chaperone [E.coli laminin-binding fimbriae (ELF) (CVF824)] [Escherichia coli O78:H18 str. WS3294A]	VFG045915 (APECO78_08690) outer membrane usher protein [E.coli laminin-binding fimbriae (ELF) (CVF824)] [Escherichia coli O78:H18 str. WS3294A]	VFG045935 (APECO78_08695) fimbrial-like adhesin protein [E.coli laminin-binding fimbriae (ELF) (CVF824)] [Escherichia coli O78:H18 str. WS3294A]	VFG045983 (CDCO157_0108) hypothetical protein [Hemorrhagic E.coli pilus (HCP) (CVF825)] [Escherichia coli O157:H7 str. Xuzhou21]	VFG045827 (EC958_1421) hemolysin E [Hemolysin/cytolysin A (CVF750)] [Escherichia coli O25b:H4-ST131]			VFG045862 (ECH74115_1100) fimbrial protein [E.coli laminin-binding fimbriae (ELF) (CVF824)] [Escherichia coli O157:H7 str. EC4115]	VFG045884 (ECH74115_1101) periplasmic pilus chaperone family protein [E.coli laminin-binding fimbriae (ELF) (CVF824)] [Escherichia coli O157:H7 str. EC4115]	VFG035720_gi:260842456_ (ECO103_0224) hypothetical protein [ACE T6SS (CVF736)] [Escherichia coli O103:H2 str. 12009]	VFG035721_gi:260866370_ (ECO111_0230) hypothetical protein [ACE T6SS (CVF736)] [Escherichia coli O111:H- str. 11128]	VFG045859 (ECO55CA74_05720) putative fimbrial-like adhesin protein [E.coli laminin-binding fimbriae (ELF) (CVF824)] [Escherichia coli O55:H7 str. RM12579]	VFG045881 (ECO55CA74_05725) chaperone [E.coli laminin-binding fimbriae (ELF) (CVF824)] [Escherichia coli O55:H7 str. RM12579]	VFG046031 (ECP_0106) type IV pilin biogenesis protein [Hemorrhagic E.coli pilus (HCP) (CVF825)] [Escherichia coli 536]	VFG045993 (ECP_0107) hypothetical protein [Hemorrhagic E.coli pilus (HCP) (CVF825)] [Escherichia coli 536]	VFG045956 (ECP_0108) major pilin subunit [Hemorrhagic E.coli pilus (HCP) (CVF825)] [Escherichia coli 536]	VFG043545_gi:218560235_ (ECS88_3547) lipoprotein NlpI [NlpI (AI331)] [Escherichia coli O45:K1:H7 str. S88]	VFG046082 (ECVR50_0238) hypothetical protein [ACE T6SS (CVF736)] [Escherichia coli VR50]	VFG046083 (ECVR50_0239) IcmF-related protein [ACE T6SS (CVF736)] [Escherichia coli VR50]	VFG046084 (ECVR50_0240) uncharacterized protein ImpA [ACE T6SS (CVF736)] [Escherichia coli VR50]	VFG046086 (ECVR50_0242) putative protease [ACE T6SS (CVF736)] [Escherichia coli VR50]	VFG046090 (ECVR50_0246) hypothetical protein [ACE T6SS (CVF736)] [Escherichia coli VR50]	VFG046091 (ECVR50_0247) hypothetical protein [ACE T6SS (CVF736)] [Escherichia coli VR50]	VFG046092 (ECVR50_0248) hypothetical protein [ACE T6SS (CVF736)] [Escherichia coli VR50]	VFG046093 (ECVR50_0249) hypothetical protein [ACE T6SS (CVF736)] [Escherichia coli VR50]	VFG046094 (ECVR50_0250) uncharacterized protein ImpC [ACE T6SS (CVF736)] [Escherichia coli VR50]	VFG046096 (ECVR50_0257) hypothetical protein [ACE T6SS (CVF736)] [Escherichia coli VR50]	VFG035711_gi:15829483_ (ECs0229) hypothetical protein [ACE T6SS (CVF736)] [Escherichia coli O157:H7 str. Sakai]	VFG042095_gi:15832966_ (ECs3712) hypothetical protein [ETT2 (SS017)] [Escherichia coli O157:H7 str. Sakai]	VFG046001 (ETEC_0103) protein transport protein HofB [Hemorrhagic E.coli pilus (HCP) (CVF825)] [Escherichia coli O78:H11:K80 str. H10407]	VFG045896 (ETEC_1007) periplasmic pilin chaperone [E.coli laminin-binding fimbriae (ELF) (CVF824)] [Escherichia coli O78:H11:K80 str. H10407]	VFG045912 (ETEC_1008) fimbrial outer membrane usher protein [E.coli laminin-binding fimbriae (ELF) (CVF824)] [Escherichia coli O78:H11:K80 str. H10407]	VFG045932 (ETEC_1011) fimbrial precursor [E.coli laminin-binding fimbriae (ELF) (CVF824)] [Escherichia coli O78:H11:K80 str. H10407]	VFG035728_gi:157155723_ (EcE24377A_0237) hypothetical protein [ACE T6SS (CVF736)] [Escherichia coli E24377A]	VFG045931 (EcE24377A_1056) fimbrial protein [E.coli laminin-binding fimbriae (ELF) (CVF824)] [Escherichia coli E24377A]	VFG035715_gi:291281048_ (G2583_0236) hypothetical protein [ACE T6SS (CVF736)] [Escherichia coli O55:H7 str. CB9615]	VFG045926 (O3M_16610) fimbrial-like adhesin protein [E.coli laminin-binding fimbriae (ELF) (CVF824)] [Escherichia coli O104:H4 str. 2009EL-2050]	VFG045906 (O3M_16615) outer membrane usher protein [E.coli laminin-binding fimbriae (ELF) (CVF824)] [Escherichia coli O104:H4 str. 2009EL-2050]	VFG035722_gi:410484142_ (O3M_20335) type VI secretion system protein ImpG [ACE T6SS (CVF736)] [Escherichia coli O104:H4 str. 2009EL-2050]	VFG045950 (O3M_20925) major pilin subunit [Hemorrhagic E.coli pilus (HCP) (CVF825)] [Escherichia coli O104:H4 str. 2009EL-2050]	VFG045987 (O3M_20930) hypothetical protein [Hemorrhagic E.coli pilus (HCP) (CVF825)] [Escherichia coli O104:H4 str. 2009EL-2050]	VFG045875 (UMNK88_1093) major type 1 subunit fimbrin FimA [E.coli laminin-binding fimbriae (ELF) (CVF824)] [Escherichia coli UMNK88]	VFG045897 (UMNK88_1094) chaperone protein FocC [E.coli laminin-binding fimbriae (ELF) (CVF824)] [Escherichia coli UMNK88]	VFG045913 (UMNK88_1095) outer membrane usher protein FimD [E.coli laminin-binding fimbriae (ELF) (CVF824)] [Escherichia coli UMNK88]	VFG045933 (UMNK88_1096) hypothetical protein [E.coli laminin-binding fimbriae (ELF) (CVF824)] [Escherichia coli UMNK88]	VFG035729_gi:386612389_ (UMNK88_238) hypothetical protein [ACE T6SS (CVF736)] [Escherichia coli UMNK88]	VFG035710_gi:15799909_ (Z0260) hypothetical protein [EHS (SS185)] [Escherichia coli O157:H7 str. EDL933]
ECL11171	VFG046044 (APECO78_03970) type IV pilin biogenesis protein [Hemorrhagic E.coli pilus (HCP) (CVF825)] [Escherichia coli O78:H18 str. WS3294A]	VFG046007 (APECO78_03975) hypothetical protein [Hemorrhagic E.coli pilus (HCP) (CVF825)] [Escherichia coli O78:H18 str. WS3294A]	VFG045899 (APECO78_08685) periplasmic pilin chaperone [E.coli laminin-binding fimbriae (ELF) (CVF824)] [Escherichia coli O78:H18 str. WS3294A]	VFG045915 (APECO78_08690) outer membrane usher protein [E.coli laminin-binding fimbriae (ELF) (CVF824)] [Escherichia coli O78:H18 str. WS3294A]	VFG045935 (APECO78_08695) fimbrial-like adhesin protein [E.coli laminin-binding fimbriae (ELF) (CVF824)] [Escherichia coli O78:H18 str. WS3294A]	VFG045983 (CDCO157_0108) hypothetical protein [Hemorrhagic E.coli pilus (HCP) (CVF825)] [Escherichia coli O157:H7 str. Xuzhou21]	VFG045827 (EC958_1421) hemolysin E [Hemolysin/cytolysin A (CVF750)] [Escherichia coli O25b:H4-ST131]			VFG045862 (ECH74115_1100) fimbrial protein [E.coli laminin-binding fimbriae (ELF) (CVF824)] [Escherichia coli O157:H7 str. EC4115]	VFG045884 (ECH74115_1101) periplasmic pilus chaperone family protein [E.coli laminin-binding fimbriae (ELF) (CVF824)] [Escherichia coli O157:H7 str. EC4115]	VFG035720_gi:260842456_ (ECO103_0224) hypothetical protein [ACE T6SS (CVF736)] [Escherichia coli O103:H2 str. 12009]	VFG035721_gi:260866370_ (ECO111_0230) hypothetical protein [ACE T6SS (CVF736)] [Escherichia coli O111:H- str. 11128]	VFG045859 (ECO55CA74_05720) putative fimbrial-like adhesin protein [E.coli laminin-binding fimbriae (ELF) (CVF824)] [Escherichia coli O55:H7 str. RM12579]	VFG045881 (ECO55CA74_05725) chaperone [E.coli laminin-binding fimbriae (ELF) (CVF824)] [Escherichia coli O55:H7 str. RM12579]	VFG046031 (ECP_0106) type IV pilin biogenesis protein [Hemorrhagic E.coli pilus (HCP) (CVF825)] [Escherichia coli 536]	VFG045993 (ECP_0107) hypothetical protein [Hemorrhagic E.coli pilus (HCP) (CVF825)] [Escherichia coli 536]	VFG045956 (ECP_0108) major pilin subunit [Hemorrhagic E.coli pilus (HCP) (CVF825)] [Escherichia coli 536]	VFG043545_gi:218560235_ (ECS88_3547) lipoprotein NlpI [NlpI (AI331)] [Escherichia coli O45:K1:H7 str. S88]	VFG046082 (ECVR50_0238) hypothetical protein [ACE T6SS (CVF736)] [Escherichia coli VR50]	VFG046083 (ECVR50_0239) IcmF-related protein [ACE T6SS (CVF736)] [Escherichia coli VR50]	VFG046084 (ECVR50_0240) uncharacterized protein ImpA [ACE T6SS (CVF736)] [Escherichia coli VR50]	VFG046086 (ECVR50_0242) putative protease [ACE T6SS (CVF736)] [Escherichia coli VR50]	VFG046090 (ECVR50_0246) hypothetical protein [ACE T6SS (CVF736)] [Escherichia coli VR50]	VFG046091 (ECVR50_0247) hypothetical protein [ACE T6SS (CVF736)] [Escherichia coli VR50]	VFG046092 (ECVR50_0248) hypothetical protein [ACE T6SS (CVF736)] [Escherichia coli VR50]	VFG046093 (ECVR50_0249) hypothetical protein [ACE T6SS (CVF736)] [Escherichia coli VR50]	VFG046094 (ECVR50_0250) uncharacterized protein ImpC [ACE T6SS (CVF736)] [Escherichia coli VR50]	VFG046096 (ECVR50_0257) hypothetical protein [ACE T6SS (CVF736)] [Escherichia coli VR50]	VFG035711_gi:15829483_ (ECs0229) hypothetical protein [ACE T6SS (CVF736)] [Escherichia coli O157:H7 str. Sakai]	VFG042095_gi:15832966_ (ECs3712) hypothetical protein [ETT2 (SS017)] [Escherichia coli O157:H7 str. Sakai]	VFG046001 (ETEC_0103) protein transport protein HofB [Hemorrhagic E.coli pilus (HCP) (CVF825)] [Escherichia coli O78:H11:K80 str. H10407]	VFG045896 (ETEC_1007) periplasmic pilin chaperone [E.coli laminin-binding fimbriae (ELF) (CVF824)] [Escherichia coli O78:H11:K80 str. H10407]	VFG045912 (ETEC_1008) fimbrial outer membrane usher protein [E.coli laminin-binding fimbriae (ELF) (CVF824)] [Escherichia coli O78:H11:K80 str. H10407]	VFG045932 (ETEC_1011) fimbrial precursor [E.coli laminin-binding fimbriae (ELF) (CVF824)] [Escherichia coli O78:H11:K80 str. H10407]	VFG035728_gi:157155723_ (EcE24377A_0237) hypothetical protein [ACE T6SS (CVF736)] [Escherichia coli E24377A]	VFG045931 (EcE24377A_1056) fimbrial protein [E.coli laminin-binding fimbriae (ELF) (CVF824)] [Escherichia coli E24377A]	VFG035715_gi:291281048_ (G2583_0236) hypothetical protein [ACE T6SS (CVF736)] [Escherichia coli O55:H7 str. CB9615]	VFG045926 (O3M_16610) fimbrial-like adhesin protein [E.coli laminin-binding fimbriae (ELF) (CVF824)] [Escherichia coli O104:H4 str. 2009EL-2050]	VFG045906 (O3M_16615) outer membrane usher protein [E.coli laminin-binding fimbriae (ELF) (CVF824)] [Escherichia coli O104:H4 str. 2009EL-2050]	VFG035722_gi:410484142_ (O3M_20335) type VI secretion system protein ImpG [ACE T6SS (CVF736)] [Escherichia coli O104:H4 str. 2009EL-2050]	VFG045950 (O3M_20925) major pilin subunit [Hemorrhagic E.coli pilus (HCP) (CVF825)] [Escherichia coli O104:H4 str. 2009EL-2050]	VFG045987 (O3M_20930) hypothetical protein [Hemorrhagic E.coli pilus (HCP) (CVF825)] [Escherichia coli O104:H4 str. 2009EL-2050]	VFG045875 (UMNK88_1093) major type 1 subunit fimbrin FimA [E.coli laminin-binding fimbriae (ELF) (CVF824)] [Escherichia coli UMNK88]	VFG045897 (UMNK88_1094) chaperone protein FocC [E.coli laminin-binding fimbriae (ELF) (CVF824)] [Escherichia coli UMNK88]	VFG045913 (UMNK88_1095) outer membrane usher protein FimD [E.coli laminin-binding fimbriae (ELF) (CVF824)] [Escherichia coli UMNK88]	VFG045933 (UMNK88_1096) hypothetical protein [E.coli laminin-binding fimbriae (ELF) (CVF824)] [Escherichia coli UMNK88]	VFG035729_gi:386612389_ (UMNK88_238) hypothetical protein [ACE T6SS (CVF736)] [Escherichia coli UMNK88]	VFG035710_gi:15799909_ (Z0260) hypothetical protein [EHS (SS185)] [Escherichia coli O157:H7 str. EDL933]
ECL11324	VFG046044 (APECO78_03970) type IV pilin biogenesis protein [Hemorrhagic E.coli pilus (HCP) (CVF825)] [Escherichia coli O78:H18 str. WS3294A]	VFG046007 (APECO78_03975) hypothetical protein [Hemorrhagic E.coli pilus (HCP) (CVF825)] [Escherichia coli O78:H18 str. WS3294A]	VFG045899 (APECO78_08685) periplasmic pilin chaperone [E.coli laminin-binding fimbriae (ELF) (CVF824)] [Escherichia coli O78:H18 str. WS3294A]	VFG045915 (APECO78_08690) outer membrane usher protein [E.coli laminin-binding fimbriae (ELF) (CVF824)] [Escherichia coli O78:H18 str. WS3294A]	VFG045935 (APECO78_08695) fimbrial-like adhesin protein [E.coli laminin-binding fimbriae (ELF) (CVF824)] [Escherichia coli O78:H18 str. WS3294A]	VFG045983 (CDCO157_0108) hypothetical protein [Hemorrhagic E.coli pilus (HCP) (CVF825)] [Escherichia coli O157:H7 str. Xuzhou21]	VFG045827 (EC958_1421) hemolysin E [Hemolysin/cytolysin A (CVF750)] [Escherichia coli O25b:H4-ST131]	VFG045820 (EC958_4121) putative autotransporter [AIDA-I (CVF450)] [Escherichia coli O25b:H4-ST131]	VFG045826 (EC958_5138) Fluffing protein [Cah, AIDA-I type (CVF745)] [Escherichia coli O25b:H4-ST131]	VFG045862 (ECH74115_1100) fimbrial protein [E.coli laminin-binding fimbriae (ELF) (CVF824)] [Escherichia coli O157:H7 str. EC4115]	VFG045884 (ECH74115_1101) periplasmic pilus chaperone family protein [E.coli laminin-binding fimbriae (ELF) (CVF824)] [Escherichia coli O157:H7 str. EC4115]	VFG035720_gi:260842456_ (ECO103_0224) hypothetical protein [ACE T6SS (CVF736)] [Escherichia coli O103:H2 str. 12009]	VFG035721_gi:260866370_ (ECO111_0230) hypothetical protein [ACE T6SS (CVF736)] [Escherichia coli O111:H- str. 11128]	VFG045859 (ECO55CA74_05720) putative fimbrial-like adhesin protein [E.coli laminin-binding fimbriae (ELF) (CVF824)] [Escherichia coli O55:H7 str. RM12579]	VFG045881 (ECO55CA74_05725) chaperone [E.coli laminin-binding fimbriae (ELF) (CVF824)] [Escherichia coli O55:H7 str. RM12579]	VFG046031 (ECP_0106) type IV pilin biogenesis protein [Hemorrhagic E.coli pilus (HCP) (CVF825)] [Escherichia coli 536]	VFG045993 (ECP_0107) hypothetical protein [Hemorrhagic E.coli pilus (HCP) (CVF825)] [Escherichia coli 536]	VFG045956 (ECP_0108) major pilin subunit [Hemorrhagic E.coli pilus (HCP) (CVF825)] [Escherichia coli 536]	VFG043545_gi:218560235_ (ECS88_3547) lipoprotein NlpI [NlpI (AI331)] [Escherichia coli O45:K1:H7 str. S88]	VFG046082 (ECVR50_0238) hypothetical protein [ACE T6SS (CVF736)] [Escherichia coli VR50]	VFG046083 (ECVR50_0239) IcmF-related protein [ACE T6SS (CVF736)] [Escherichia coli VR50]	VFG046084 (ECVR50_0240) uncharacterized protein ImpA [ACE T6SS (CVF736)] [Escherichia coli VR50]	VFG046086 (ECVR50_0242) putative protease [ACE T6SS (CVF736)] [Escherichia coli VR50]	VFG046090 (ECVR50_0246) hypothetical protein [ACE T6SS (CVF736)] [Escherichia coli VR50]	VFG046091 (ECVR50_0247) hypothetical protein [ACE T6SS (CVF736)] [Escherichia coli VR50]	VFG046092 (ECVR50_0248) hypothetical protein [ACE T6SS (CVF736)] [Escherichia coli VR50]	VFG046093 (ECVR50_0249) hypothetical protein [ACE T6SS (CVF736)] [Escherichia coli VR50]	VFG046094 (ECVR50_0250) uncharacterized protein ImpC [ACE T6SS (CVF736)] [Escherichia coli VR50]	VFG046096 (ECVR50_0257) hypothetical protein [ACE T6SS (CVF736)] [Escherichia coli VR50]	VFG035711_gi:15829483_ (ECs0229) hypothetical protein [ACE T6SS (CVF736)] [Escherichia coli O157:H7 str. Sakai]	VFG042095_gi:15832966_ (ECs3712) hypothetical protein [ETT2 (SS017)] [Escherichia coli O157:H7 str. Sakai]	VFG046001 (ETEC_0103) protein transport protein HofB [Hemorrhagic E.coli pilus (HCP) (CVF825)] [Escherichia coli O78:H11:K80 str. H10407]	VFG045896 (ETEC_1007) periplasmic pilin chaperone [E.coli laminin-binding fimbriae (ELF) (CVF824)] [Escherichia coli O78:H11:K80 str. H10407]	VFG045912 (ETEC_1008) fimbrial outer membrane usher protein [E.coli laminin-binding fimbriae (ELF) (CVF824)] [Escherichia coli O78:H11:K80 str. H10407]	VFG045932 (ETEC_1011) fimbrial precursor [E.coli laminin-binding fimbriae (ELF) (CVF824)] [Escherichia coli O78:H11:K80 str. H10407]	VFG035728_gi:157155723_ (EcE24377A_0237) hypothetical protein [ACE T6SS (CVF736)] [Escherichia coli E24377A]	VFG045931 (EcE24377A_1056) fimbrial protein [E.coli laminin-binding fimbriae (ELF) (CVF824)] [Escherichia coli E24377A]	VFG035715_gi:291281048_ (G2583_0236) hypothetical protein [ACE T6SS (CVF736)] [Escherichia coli O55:H7 str. CB9615]	VFG045926 (O3M_16610) fimbrial-like adhesin protein [E.coli laminin-binding fimbriae (ELF) (CVF824)] [Escherichia coli O104:H4 str. 2009EL-2050]	VFG045906 (O3M_16615) outer membrane usher protein [E.coli laminin-binding fimbriae (ELF) (CVF824)] [Escherichia coli O104:H4 str. 2009EL-2050]	VFG035722_gi:410484142_ (O3M_20335) type VI secretion system protein ImpG [ACE T6SS (CVF736)] [Escherichia coli O104:H4 str. 2009EL-2050]	VFG045950 (O3M_20925) major pilin subunit [Hemorrhagic E.coli pilus (HCP) (CVF825)] [Escherichia coli O104:H4 str. 2009EL-2050]	VFG045987 (O3M_20930) hypothetical protein [Hemorrhagic E.coli pilus (HCP) (CVF825)] [Escherichia coli O104:H4 str. 2009EL-2050]	VFG045875 (UMNK88_1093) major type 1 subunit fimbrin FimA [E.coli laminin-binding fimbriae (ELF) (CVF824)] [Escherichia coli UMNK88]	VFG045897 (UMNK88_1094) chaperone protein FocC [E.coli laminin-binding fimbriae (ELF) (CVF824)] [Escherichia coli UMNK88]	VFG045913 (UMNK88_1095) outer membrane usher protein FimD [E.coli laminin-binding fimbriae (ELF) (CVF824)] [Escherichia coli UMNK88]	VFG045933 (UMNK88_1096) hypothetical protein [E.coli laminin-binding fimbriae (ELF) (CVF824)] [Escherichia coli UMNK88]	VFG035729_gi:386612389_ (UMNK88_238) hypothetical protein [ACE T6SS (CVF736)] [Escherichia coli UMNK88]	VFG035710_gi:15799909_ (Z0260) hypothetical protein [EHS (SS185)] [Escherichia coli O157:H7 str. EDL933]
ECL13086	VFG046044 (APECO78_03970) type IV pilin biogenesis protein [Hemorrhagic E.coli pilus (HCP) (CVF825)] [Escherichia coli O78:H18 str. WS3294A]	VFG046007 (APECO78_03975) hypothetical protein [Hemorrhagic E.coli pilus (HCP) (CVF825)] [Escherichia coli O78:H18 str. WS3294A]	VFG045899 (APECO78_08685) periplasmic pilin chaperone [E.coli laminin-binding fimbriae (ELF) (CVF824)] [Escherichia coli O78:H18 str. WS3294A]	VFG045915 (APECO78_08690) outer membrane usher protein [E.coli laminin-binding fimbriae (ELF) (CVF824)] [Escherichia coli O78:H18 str. WS3294A]	VFG045935 (APECO78_08695) fimbrial-like adhesin protein [E.coli laminin-binding fimbriae (ELF) (CVF824)] [Escherichia coli O78:H18 str. WS3294A]	VFG045983 (CDCO157_0108) hypothetical protein [Hemorrhagic E.coli pilus (HCP) (CVF825)] [Escherichia coli O157:H7 str. Xuzhou21]	VFG045827 (EC958_1421) hemolysin E [Hemolysin/cytolysin A (CVF750)] [Escherichia coli O25b:H4-ST131]	VFG045820 (EC958_4121) putative autotransporter [AIDA-I (CVF450)] [Escherichia coli O25b:H4-ST131]	VFG045826 (EC958_5138) Fluffing protein [Cah, AIDA-I type (CVF745)] [Escherichia coli O25b:H4-ST131]	VFG045862 (ECH74115_1100) fimbrial protein [E.coli laminin-binding fimbriae (ELF) (CVF824)] [Escherichia coli O157:H7 str. EC4115]	VFG045884 (ECH74115_1101) periplasmic pilus chaperone family protein [E.coli laminin-binding fimbriae (ELF) (CVF824)] [Escherichia coli O157:H7 str. EC4115]	VFG035720_gi:260842456_ (ECO103_0224) hypothetical protein [ACE T6SS (CVF736)] [Escherichia coli O103:H2 str. 12009]	VFG035721_gi:260866370_ (ECO111_0230) hypothetical protein [ACE T6SS (CVF736)] [Escherichia coli O111:H- str. 11128]	VFG045859 (ECO55CA74_05720) putative fimbrial-like adhesin protein [E.coli laminin-binding fimbriae (ELF) (CVF824)] [Escherichia coli O55:H7 str. RM12579]	VFG045881 (ECO55CA74_05725) chaperone [E.coli laminin-binding fimbriae (ELF) (CVF824)] [Escherichia coli O55:H7 str. RM12579]	VFG046031 (ECP_0106) type IV pilin biogenesis protein [Hemorrhagic E.coli pilus (HCP) (CVF825)] [Escherichia coli 536]	VFG045993 (ECP_0107) hypothetical protein [Hemorrhagic E.coli pilus (HCP) (CVF825)] [Escherichia coli 536]	VFG045956 (ECP_0108) major pilin subunit [Hemorrhagic E.coli pilus (HCP) (CVF825)] [Escherichia coli 536]	VFG043545_gi:218560235_ (ECS88_3547) lipoprotein NlpI [NlpI (AI331)] [Escherichia coli O45:K1:H7 str. S88]	VFG046082 (ECVR50_0238) hypothetical protein [ACE T6SS (CVF736)] [Escherichia coli VR50]	VFG046083 (ECVR50_0239) IcmF-related protein [ACE T6SS (CVF736)] [Escherichia coli VR50]	VFG046084 (ECVR50_0240) uncharacterized protein ImpA [ACE T6SS (CVF736)] [Escherichia coli VR50]	VFG046086 (ECVR50_0242) putative protease [ACE T6SS (CVF736)] [Escherichia coli VR50]	VFG046090 (ECVR50_0246) hypothetical protein [ACE T6SS (CVF736)] [Escherichia coli VR50]	VFG046091 (ECVR50_0247) hypothetical protein [ACE T6SS (CVF736)] [Escherichia coli VR50]	VFG046092 (ECVR50_0248) hypothetical protein [ACE T6SS (CVF736)] [Escherichia coli VR50]	VFG046093 (ECVR50_0249) hypothetical protein [ACE T6SS (CVF736)] [Escherichia coli VR50]	VFG046094 (ECVR50_0250) uncharacterized protein ImpC [ACE T6SS (CVF736)] [Escherichia coli VR50]	VFG046096 (ECVR50_0257) hypothetical protein [ACE T6SS (CVF736)] [Escherichia coli VR50]	VFG035711_gi:15829483_ (ECs0229) hypothetical protein [ACE T6SS (CVF736)] [Escherichia coli O157:H7 str. Sakai]	VFG042095_gi:15832966_ (ECs3712) hypothetical protein [ETT2 (SS017)] [Escherichia coli O157:H7 str. Sakai]	VFG046001 (ETEC_0103) protein transport protein HofB [Hemorrhagic E.coli pilus (HCP) (CVF825)] [Escherichia coli O78:H11:K80 str. H10407]	VFG045896 (ETEC_1007) periplasmic pilin chaperone [E.coli laminin-binding fimbriae (ELF) (CVF824)] [Escherichia coli O78:H11:K80 str. H10407]	VFG045912 (ETEC_1008) fimbrial outer membrane usher protein [E.coli laminin-binding fimbriae (ELF) (CVF824)] [Escherichia coli O78:H11:K80 str. H10407]	VFG045932 (ETEC_1011) fimbrial precursor [E.coli laminin-binding fimbriae (ELF) (CVF824)] [Escherichia coli O78:H11:K80 str. H10407]	VFG035728_gi:157155723_ (EcE24377A_0237) hypothetical protein [ACE T6SS (CVF736)] [Escherichia coli E24377A]	VFG045931 (EcE24377A_1056) fimbrial protein [E.coli laminin-binding fimbriae (ELF) (CVF824)] [Escherichia coli E24377A]	VFG035715_gi:291281048_ (G2583_0236) hypothetical protein [ACE T6SS (CVF736)] [Escherichia coli O55:H7 str. CB9615]	VFG045926 (O3M_16610) fimbrial-like adhesin protein [E.coli laminin-binding fimbriae (ELF) (CVF824)] [Escherichia coli O104:H4 str. 2009EL-2050]	VFG045906 (O3M_16615) outer membrane usher protein [E.coli laminin-binding fimbriae (ELF) (CVF824)] [Escherichia coli O104:H4 str. 2009EL-2050]	VFG035722_gi:410484142_ (O3M_20335) type VI secretion system protein ImpG [ACE T6SS (CVF736)] [Escherichia coli O104:H4 str. 2009EL-2050]	VFG045950 (O3M_20925) major pilin subunit [Hemorrhagic E.coli pilus (HCP) (CVF825)] [Escherichia coli O104:H4 str. 2009EL-2050]	VFG045987 (O3M_20930) hypothetical protein [Hemorrhagic E.coli pilus (HCP) (CVF825)] [Escherichia coli O104:H4 str. 2009EL-2050]	VFG045875 (UMNK88_1093) major type 1 subunit fimbrin FimA [E.coli laminin-binding fimbriae (ELF) (CVF824)] [Escherichia coli UMNK88]	VFG045897 (UMNK88_1094) chaperone protein FocC [E.coli laminin-binding fimbriae (ELF) (CVF824)] [Escherichia coli UMNK88]	VFG045913 (UMNK88_1095) outer membrane usher protein FimD [E.coli laminin-binding fimbriae (ELF) (CVF824)] [Escherichia coli UMNK88]	VFG045933 (UMNK88_1096) hypothetical protein [E.coli laminin-binding fimbriae (ELF) (CVF824)] [Escherichia coli UMNK88]	VFG035729_gi:386612389_ (UMNK88_238) hypothetical protein [ACE T6SS (CVF736)] [Escherichia coli UMNK88]	VFG035710_gi:15799909_ (Z0260) hypothetical protein [EHS (SS185)] [Escherichia coli O157:H7 str. EDL933]
ECL13345	VFG046044 (APECO78_03970) type IV pilin biogenesis protein [Hemorrhagic E.coli pilus (HCP) (CVF825)] [Escherichia coli O78:H18 str. WS3294A]	VFG046007 (APECO78_03975) hypothetical protein [Hemorrhagic E.coli pilus (HCP) (CVF825)] [Escherichia coli O78:H18 str. WS3294A]	VFG045899 (APECO78_08685) periplasmic pilin chaperone [E.coli laminin-binding fimbriae (ELF) (CVF824)] [Escherichia coli O78:H18 str. WS3294A]	VFG045915 (APECO78_08690) outer membrane usher protein [E.coli laminin-binding fimbriae (ELF) (CVF824)] [Escherichia coli O78:H18 str. WS3294A]	VFG045935 (APECO78_08695) fimbrial-like adhesin protein [E.coli laminin-binding fimbriae (ELF) (CVF824)] [Escherichia coli O78:H18 str. WS3294A]	VFG045983 (CDCO157_0108) hypothetical protein [Hemorrhagic E.coli pilus (HCP) (CVF825)] [Escherichia coli O157:H7 str. Xuzhou21]	VFG045827 (EC958_1421) hemolysin E [Hemolysin/cytolysin A (CVF750)] [Escherichia coli O25b:H4-ST131]	VFG045820 (EC958_4121) putative autotransporter [AIDA-I (CVF450)] [Escherichia coli O25b:H4-ST131]	VFG045826 (EC958_5138) Fluffing protein [Cah, AIDA-I type (CVF745)] [Escherichia coli O25b:H4-ST131]	VFG045862 (ECH74115_1100) fimbrial protein [E.coli laminin-binding fimbriae (ELF) (CVF824)] [Escherichia coli O157:H7 str. EC4115]	VFG045884 (ECH74115_1101) periplasmic pilus chaperone family protein [E.coli laminin-binding fimbriae (ELF) (CVF824)] [Escherichia coli O157:H7 str. EC4115]	VFG035720_gi:260842456_ (ECO103_0224) hypothetical protein [ACE T6SS (CVF736)] [Escherichia coli O103:H2 str. 12009]	VFG035721_gi:260866370_ (ECO111_0230) hypothetical protein [ACE T6SS (CVF736)] [Escherichia coli O111:H- str. 11128]	VFG045859 (ECO55CA74_05720) putative fimbrial-like adhesin protein [E.coli laminin-binding fimbriae (ELF) (CVF824)] [Escherichia coli O55:H7 str. RM12579]	VFG045881 (ECO55CA74_05725) chaperone [E.coli laminin-binding fimbriae (ELF) (CVF824)] [Escherichia coli O55:H7 str. RM12579]	VFG046031 (ECP_0106) type IV pilin biogenesis protein [Hemorrhagic E.coli pilus (HCP) (CVF825)] [Escherichia coli 536]	VFG045993 (ECP_0107) hypothetical protein [Hemorrhagic E.coli pilus (HCP) (CVF825)] [Escherichia coli 536]	VFG045956 (ECP_0108) major pilin subunit [Hemorrhagic E.coli pilus (HCP) (CVF825)] [Escherichia coli 536]	VFG043545_gi:218560235_ (ECS88_3547) lipoprotein NlpI [NlpI (AI331)] [Escherichia coli O45:K1:H7 str. S88]	VFG046082 (ECVR50_0238) hypothetical protein [ACE T6SS (CVF736)] [Escherichia coli VR50]	VFG046083 (ECVR50_0239) IcmF-related protein [ACE T6SS (CVF736)] [Escherichia coli VR50]	VFG046084 (ECVR50_0240) uncharacterized protein ImpA [ACE T6SS (CVF736)] [Escherichia coli VR50]	VFG046086 (ECVR50_0242) putative protease [ACE T6SS (CVF736)] [Escherichia coli VR50]	VFG046090 (ECVR50_0246) hypothetical protein [ACE T6SS (CVF736)] [Escherichia coli VR50]	VFG046091 (ECVR50_0247) hypothetical protein [ACE T6SS (CVF736)] [Escherichia coli VR50]	VFG046092 (ECVR50_0248) hypothetical protein [ACE T6SS (CVF736)] [Escherichia coli VR50]	VFG046093 (ECVR50_0249) hypothetical protein [ACE T6SS (CVF736)] [Escherichia coli VR50]	VFG046094 (ECVR50_0250) uncharacterized protein ImpC [ACE T6SS (CVF736)] [Escherichia coli VR50]	VFG046096 (ECVR50_0257) hypothetical protein [ACE T6SS (CVF736)] [Escherichia coli VR50]	VFG035711_gi:15829483_ (ECs0229) hypothetical protein [ACE T6SS (CVF736)] [Escherichia coli O157:H7 str. Sakai]	VFG042095_gi:15832966_ (ECs3712) hypothetical protein [ETT2 (SS017)] [Escherichia coli O157:H7 str. Sakai]	VFG046001 (ETEC_0103) protein transport protein HofB [Hemorrhagic E.coli pilus (HCP) (CVF825)] [Escherichia coli O78:H11:K80 str. H10407]	VFG045896 (ETEC_1007) periplasmic pilin chaperone [E.coli laminin-binding fimbriae (ELF) (CVF824)] [Escherichia coli O78:H11:K80 str. H10407]	VFG045912 (ETEC_1008) fimbrial outer membrane usher protein [E.coli laminin-binding fimbriae (ELF) (CVF824)] [Escherichia coli O78:H11:K80 str. H10407]	VFG045932 (ETEC_1011) fimbrial precursor [E.coli laminin-binding fimbriae (ELF) (CVF824)] [Escherichia coli O78:H11:K80 str. H10407]	VFG035728_gi:157155723_ (EcE24377A_0237) hypothetical protein [ACE T6SS (CVF736)] [Escherichia coli E24377A]	VFG045931 (EcE24377A_1056) fimbrial protein [E.coli laminin-binding fimbriae (ELF) (CVF824)] [Escherichia coli E24377A]	VFG035715_gi:291281048_ (G2583_0236) hypothetical protein [ACE T6SS (CVF736)] [Escherichia coli O55:H7 str. CB9615]	VFG045926 (O3M_16610) fimbrial-like adhesin protein [E.coli laminin-binding fimbriae (ELF) (CVF824)] [Escherichia coli O104:H4 str. 2009EL-2050]	VFG045906 (O3M_16615) outer membrane usher protein [E.coli laminin-binding fimbriae (ELF) (CVF824)] [Escherichia coli O104:H4 str. 2009EL-2050]	VFG035722_gi:410484142_ (O3M_20335) type VI secretion system protein ImpG [ACE T6SS (CVF736)] [Escherichia coli O104:H4 str. 2009EL-2050]	VFG045950 (O3M_20925) major pilin subunit [Hemorrhagic E.coli pilus (HCP) (CVF825)] [Escherichia coli O104:H4 str. 2009EL-2050]	VFG045987 (O3M_20930) hypothetical protein [Hemorrhagic E.coli pilus (HCP) (CVF825)] [Escherichia coli O104:H4 str. 2009EL-2050]	VFG045875 (UMNK88_1093) major type 1 subunit fimbrin FimA [E.coli laminin-binding fimbriae (ELF) (CVF824)] [Escherichia coli UMNK88]	VFG045897 (UMNK88_1094) chaperone protein FocC [E.coli laminin-binding fimbriae (ELF) (CVF824)] [Escherichia coli UMNK88]	VFG045913 (UMNK88_1095) outer membrane usher protein FimD [E.coli laminin-binding fimbriae (ELF) (CVF824)] [Escherichia coli UMNK88]	VFG045933 (UMNK88_1096) hypothetical protein [E.coli laminin-binding fimbriae (ELF) (CVF824)] [Escherichia coli UMNK88]	VFG035729_gi:386612389_ (UMNK88_238) hypothetical protein [ACE T6SS (CVF736)] [Escherichia coli UMNK88]	VFG035710_gi:15799909_ (Z0260) hypothetical protein [EHS (SS185)] [Escherichia coli O157:H7 str. EDL933]
ECL14048	VFG046044 (APECO78_03970) type IV pilin biogenesis protein [Hemorrhagic E.coli pilus (HCP) (CVF825)] [Escherichia coli O78:H18 str. WS3294A]	VFG046007 (APECO78_03975) hypothetical protein [Hemorrhagic E.coli pilus (HCP) (CVF825)] [Escherichia coli O78:H18 str. WS3294A]	VFG045899 (APECO78_08685) periplasmic pilin chaperone [E.coli laminin-binding fimbriae (ELF) (CVF824)] [Escherichia coli O78:H18 str. WS3294A]	VFG045915 (APECO78_08690) outer membrane usher protein [E.coli laminin-binding fimbriae (ELF) (CVF824)] [Escherichia coli O78:H18 str. WS3294A]	VFG045935 (APECO78_08695) fimbrial-like adhesin protein [E.coli laminin-binding fimbriae (ELF) (CVF824)] [Escherichia coli O78:H18 str. WS3294A]	VFG045983 (CDCO157_0108) hypothetical protein [Hemorrhagic E.coli pilus (HCP) (CVF825)] [Escherichia coli O157:H7 str. Xuzhou21]	VFG045827 (EC958_1421) hemolysin E [Hemolysin/cytolysin A (CVF750)] [Escherichia coli O25b:H4-ST131]			VFG045862 (ECH74115_1100) fimbrial protein [E.coli laminin-binding fimbriae (ELF) (CVF824)] [Escherichia coli O157:H7 str. EC4115]	VFG045884 (ECH74115_1101) periplasmic pilus chaperone family protein [E.coli laminin-binding fimbriae (ELF) (CVF824)] [Escherichia coli O157:H7 str. EC4115]	VFG035720_gi:260842456_ (ECO103_0224) hypothetical protein [ACE T6SS (CVF736)] [Escherichia coli O103:H2 str. 12009]	VFG035721_gi:260866370_ (ECO111_0230) hypothetical protein [ACE T6SS (CVF736)] [Escherichia coli O111:H- str. 11128]	VFG045859 (ECO55CA74_05720) putative fimbrial-like adhesin protein [E.coli laminin-binding fimbriae (ELF) (CVF824)] [Escherichia coli O55:H7 str. RM12579]	VFG045881 (ECO55CA74_05725) chaperone [E.coli laminin-binding fimbriae (ELF) (CVF824)] [Escherichia coli O55:H7 str. RM12579]	VFG046031 (ECP_0106) type IV pilin biogenesis protein [Hemorrhagic E.coli pilus (HCP) (CVF825)] [Escherichia coli 536]	VFG045993 (ECP_0107) hypothetical protein [Hemorrhagic E.coli pilus (HCP) (CVF825)] [Escherichia coli 536]	VFG045956 (ECP_0108) major pilin subunit [Hemorrhagic E.coli pilus (HCP) (CVF825)] [Escherichia coli 536]	VFG043545_gi:218560235_ (ECS88_3547) lipoprotein NlpI [NlpI (AI331)] [Escherichia coli O45:K1:H7 str. S88]	VFG046082 (ECVR50_0238) hypothetical protein [ACE T6SS (CVF736)] [Escherichia coli VR50]	VFG046083 (ECVR50_0239) IcmF-related protein [ACE T6SS (CVF736)] [Escherichia coli VR50]	VFG046084 (ECVR50_0240) uncharacterized protein ImpA [ACE T6SS (CVF736)] [Escherichia coli VR50]	VFG046086 (ECVR50_0242) putative protease [ACE T6SS (CVF736)] [Escherichia coli VR50]	VFG046090 (ECVR50_0246) hypothetical protein [ACE T6SS (CVF736)] [Escherichia coli VR50]	VFG046091 (ECVR50_0247) hypothetical protein [ACE T6SS (CVF736)] [Escherichia coli VR50]	VFG046092 (ECVR50_0248) hypothetical protein [ACE T6SS (CVF736)] [Escherichia coli VR50]	VFG046093 (ECVR50_0249) hypothetical protein [ACE T6SS (CVF736)] [Escherichia coli VR50]	VFG046094 (ECVR50_0250) uncharacterized protein ImpC [ACE T6SS (CVF736)] [Escherichia coli VR50]	VFG046096 (ECVR50_0257) hypothetical protein [ACE T6SS (CVF736)] [Escherichia coli VR50]	VFG035711_gi:15829483_ (ECs0229) hypothetical protein [ACE T6SS (CVF736)] [Escherichia coli O157:H7 str. Sakai]	VFG042095_gi:15832966_ (ECs3712) hypothetical protein [ETT2 (SS017)] [Escherichia coli O157:H7 str. Sakai]	VFG046001 (ETEC_0103) protein transport protein HofB [Hemorrhagic E.coli pilus (HCP) (CVF825)] [Escherichia coli O78:H11:K80 str. H10407]	VFG045896 (ETEC_1007) periplasmic pilin chaperone [E.coli laminin-binding fimbriae (ELF) (CVF824)] [Escherichia coli O78:H11:K80 str. H10407]	VFG045912 (ETEC_1008) fimbrial outer membrane usher protein [E.coli laminin-binding fimbriae (ELF) (CVF824)] [Escherichia coli O78:H11:K80 str. H10407]	VFG045932 (ETEC_1011) fimbrial precursor [E.coli laminin-binding fimbriae (ELF) (CVF824)] [Escherichia coli O78:H11:K80 str. H10407]	VFG035728_gi:157155723_ (EcE24377A_0237) hypothetical protein [ACE T6SS (CVF736)] [Escherichia coli E24377A]	VFG045931 (EcE24377A_1056) fimbrial protein [E.coli laminin-binding fimbriae (ELF) (CVF824)] [Escherichia coli E24377A]	VFG035715_gi:291281048_ (G2583_0236) hypothetical protein [ACE T6SS (CVF736)] [Escherichia coli O55:H7 str. CB9615]	VFG045926 (O3M_16610) fimbrial-like adhesin protein [E.coli laminin-binding fimbriae (ELF) (CVF824)] [Escherichia coli O104:H4 str. 2009EL-2050]	VFG045906 (O3M_16615) outer membrane usher protein [E.coli laminin-binding fimbriae (ELF) (CVF824)] [Escherichia coli O104:H4 str. 2009EL-2050]	VFG035722_gi:410484142_ (O3M_20335) type VI secretion system protein ImpG [ACE T6SS (CVF736)] [Escherichia coli O104:H4 str. 2009EL-2050]	VFG045950 (O3M_20925) major pilin subunit [Hemorrhagic E.coli pilus (HCP) (CVF825)] [Escherichia coli O104:H4 str. 2009EL-2050]	VFG045987 (O3M_20930) hypothetical protein [Hemorrhagic E.coli pilus (HCP) (CVF825)] [Escherichia coli O104:H4 str. 2009EL-2050]	VFG045875 (UMNK88_1093) major type 1 subunit fimbrin FimA [E.coli laminin-binding fimbriae (ELF) (CVF824)] [Escherichia coli UMNK88]	VFG045897 (UMNK88_1094) chaperone protein FocC [E.coli laminin-binding fimbriae (ELF) (CVF824)] [Escherichia coli UMNK88]	VFG045913 (UMNK88_1095) outer membrane usher protein FimD [E.coli laminin-binding fimbriae (ELF) (CVF824)] [Escherichia coli UMNK88]	VFG045933 (UMNK88_1096) hypothetical protein [E.coli laminin-binding fimbriae (ELF) (CVF824)] [Escherichia coli UMNK88]	VFG035729_gi:386612389_ (UMNK88_238) hypothetical protein [ACE T6SS (CVF736)] [Escherichia coli UMNK88]	VFG035710_gi:15799909_ (Z0260) hypothetical protein [EHS (SS185)] [Escherichia coli O157:H7 str. EDL933]
ECL14672	VFG046044 (APECO78_03970) type IV pilin biogenesis protein [Hemorrhagic E.coli pilus (HCP) (CVF825)] [Escherichia coli O78:H18 str. WS3294A]	VFG046007 (APECO78_03975) hypothetical protein [Hemorrhagic E.coli pilus (HCP) (CVF825)] [Escherichia coli O78:H18 str. WS3294A]	VFG045899 (APECO78_08685) periplasmic pilin chaperone [E.coli laminin-binding fimbriae (ELF) (CVF824)] [Escherichia coli O78:H18 str. WS3294A]	VFG045915 (APECO78_08690) outer membrane usher protein [E.coli laminin-binding fimbriae (ELF) (CVF824)] [Escherichia coli O78:H18 str. WS3294A]	VFG045935 (APECO78_08695) fimbrial-like adhesin protein [E.coli laminin-binding fimbriae (ELF) (CVF824)] [Escherichia coli O78:H18 str. WS3294A]	VFG045983 (CDCO157_0108) hypothetical protein [Hemorrhagic E.coli pilus (HCP) (CVF825)] [Escherichia coli O157:H7 str. Xuzhou21]	VFG045827 (EC958_1421) hemolysin E [Hemolysin/cytolysin A (CVF750)] [Escherichia coli O25b:H4-ST131]				VFG045884 (ECH74115_1101) periplasmic pilus chaperone family protein [E.coli laminin-binding fimbriae (ELF) (CVF824)] [Escherichia coli O157:H7 str. EC4115]				VFG045881 (ECO55CA74_05725) chaperone [E.coli laminin-binding fimbriae (ELF) (CVF824)] [Escherichia coli O55:H7 str. RM12579]	VFG046031 (ECP_0106) type IV pilin biogenesis protein [Hemorrhagic E.coli pilus (HCP) (CVF825)] [Escherichia coli 536]	VFG045993 (ECP_0107) hypothetical protein [Hemorrhagic E.coli pilus (HCP) (CVF825)] [Escherichia coli 536]	VFG045956 (ECP_0108) major pilin subunit [Hemorrhagic E.coli pilus (HCP) (CVF825)] [Escherichia coli 536]	VFG043545_gi:218560235_ (ECS88_3547) lipoprotein NlpI [NlpI (AI331)] [Escherichia coli O45:K1:H7 str. S88]												VFG042095_gi:15832966_ (ECs3712) hypothetical protein [ETT2 (SS017)] [Escherichia coli O157:H7 str. Sakai]	VFG046001 (ETEC_0103) protein transport protein HofB [Hemorrhagic E.coli pilus (HCP) (CVF825)] [Escherichia coli O78:H11:K80 str. H10407]	VFG045896 (ETEC_1007) periplasmic pilin chaperone [E.coli laminin-binding fimbriae (ELF) (CVF824)] [Escherichia coli O78:H11:K80 str. H10407]	VFG045912 (ETEC_1008) fimbrial outer membrane usher protein [E.coli laminin-binding fimbriae (ELF) (CVF824)] [Escherichia coli O78:H11:K80 str. H10407]	VFG045932 (ETEC_1011) fimbrial precursor [E.coli laminin-binding fimbriae (ELF) (CVF824)] [Escherichia coli O78:H11:K80 str. H10407]		VFG045931 (EcE24377A_1056) fimbrial protein [E.coli laminin-binding fimbriae (ELF) (CVF824)] [Escherichia coli E24377A]		VFG045926 (O3M_16610) fimbrial-like adhesin protein [E.coli laminin-binding fimbriae (ELF) (CVF824)] [Escherichia coli O104:H4 str. 2009EL-2050]	VFG045906 (O3M_16615) outer membrane usher protein [E.coli laminin-binding fimbriae (ELF) (CVF824)] [Escherichia coli O104:H4 str. 2009EL-2050]		VFG045950 (O3M_20925) major pilin subunit [Hemorrhagic E.coli pilus (HCP) (CVF825)] [Escherichia coli O104:H4 str. 2009EL-2050]	VFG045987 (O3M_20930) hypothetical protein [Hemorrhagic E.coli pilus (HCP) (CVF825)] [Escherichia coli O104:H4 str. 2009EL-2050]		VFG045897 (UMNK88_1094) chaperone protein FocC [E.coli laminin-binding fimbriae (ELF) (CVF824)] [Escherichia coli UMNK88]	VFG045913 (UMNK88_1095) outer membrane usher protein FimD [E.coli laminin-binding fimbriae (ELF) (CVF824)] [Escherichia coli UMNK88]	VFG045933 (UMNK88_1096) hypothetical protein [E.coli laminin-binding fimbriae (ELF) (CVF824)] [Escherichia coli UMNK88]
ECL16273	VFG046044 (APECO78_03970) type IV pilin biogenesis protein [Hemorrhagic E.coli pilus (HCP) (CVF825)] [Escherichia coli O78:H18 str. WS3294A]	VFG046007 (APECO78_03975) hypothetical protein [Hemorrhagic E.coli pilus (HCP) (CVF825)] [Escherichia coli O78:H18 str. WS3294A]	VFG045899 (APECO78_08685) periplasmic pilin chaperone [E.coli laminin-binding fimbriae (ELF) (CVF824)] [Escherichia coli O78:H18 str. WS3294A]	VFG045915 (APECO78_08690) outer membrane usher protein [E.coli laminin-binding fimbriae (ELF) (CVF824)] [Escherichia coli O78:H18 str. WS3294A]	VFG045935 (APECO78_08695) fimbrial-like adhesin protein [E.coli laminin-binding fimbriae (ELF) (CVF824)] [Escherichia coli O78:H18 str. WS3294A]	VFG045983 (CDCO157_0108) hypothetical protein [Hemorrhagic E.coli pilus (HCP) (CVF825)] [Escherichia coli O157:H7 str. Xuzhou21]	VFG045827 (EC958_1421) hemolysin E [Hemolysin/cytolysin A (CVF750)] [Escherichia coli O25b:H4-ST131]				VFG045884 (ECH74115_1101) periplasmic pilus chaperone family protein [E.coli laminin-binding fimbriae (ELF) (CVF824)] [Escherichia coli O157:H7 str. EC4115]				VFG045881 (ECO55CA74_05725) chaperone [E.coli laminin-binding fimbriae (ELF) (CVF824)] [Escherichia coli O55:H7 str. RM12579]	VFG046031 (ECP_0106) type IV pilin biogenesis protein [Hemorrhagic E.coli pilus (HCP) (CVF825)] [Escherichia coli 536]	VFG045993 (ECP_0107) hypothetical protein [Hemorrhagic E.coli pilus (HCP) (CVF825)] [Escherichia coli 536]	VFG045956 (ECP_0108) major pilin subunit [Hemorrhagic E.coli pilus (HCP) (CVF825)] [Escherichia coli 536]	VFG043545_gi:218560235_ (ECS88_3547) lipoprotein NlpI [NlpI (AI331)] [Escherichia coli O45:K1:H7 str. S88]												VFG042095_gi:15832966_ (ECs3712) hypothetical protein [ETT2 (SS017)] [Escherichia coli O157:H7 str. Sakai]	VFG046001 (ETEC_0103) protein transport protein HofB [Hemorrhagic E.coli pilus (HCP) (CVF825)] [Escherichia coli O78:H11:K80 str. H10407]	VFG045896 (ETEC_1007) periplasmic pilin chaperone [E.coli laminin-binding fimbriae (ELF) (CVF824)] [Escherichia coli O78:H11:K80 str. H10407]	VFG045912 (ETEC_1008) fimbrial outer membrane usher protein [E.coli laminin-binding fimbriae (ELF) (CVF824)] [Escherichia coli O78:H11:K80 str. H10407]	VFG045932 (ETEC_1011) fimbrial precursor [E.coli laminin-binding fimbriae (ELF) (CVF824)] [Escherichia coli O78:H11:K80 str. H10407]		VFG045931 (EcE24377A_1056) fimbrial protein [E.coli laminin-binding fimbriae (ELF) (CVF824)] [Escherichia coli E24377A]		VFG045926 (O3M_16610) fimbrial-like adhesin protein [E.coli laminin-binding fimbriae (ELF) (CVF824)] [Escherichia coli O104:H4 str. 2009EL-2050]	VFG045906 (O3M_16615) outer membrane usher protein [E.coli laminin-binding fimbriae (ELF) (CVF824)] [Escherichia coli O104:H4 str. 2009EL-2050]		VFG045950 (O3M_20925) major pilin subunit [Hemorrhagic E.coli pilus (HCP) (CVF825)] [Escherichia coli O104:H4 str. 2009EL-2050]	VFG045987 (O3M_20930) hypothetical protein [Hemorrhagic E.coli pilus (HCP) (CVF825)] [Escherichia coli O104:H4 str. 2009EL-2050]		VFG045897 (UMNK88_1094) chaperone protein FocC [E.coli laminin-binding fimbriae (ELF) (CVF824)] [Escherichia coli UMNK88]	VFG045913 (UMNK88_1095) outer membrane usher protein FimD [E.coli laminin-binding fimbriae (ELF) (CVF824)] [Escherichia coli UMNK88]	VFG045933 (UMNK88_1096) hypothetical protein [E.coli laminin-binding fimbriae (ELF) (CVF824)] [Escherichia coli UMNK88]
ECL17377	VFG046044 (APECO78_03970) type IV pilin biogenesis protein [Hemorrhagic E.coli pilus (HCP) (CVF825)] [Escherichia coli O78:H18 str. WS3294A]	VFG046007 (APECO78_03975) hypothetical protein [Hemorrhagic E.coli pilus (HCP) (CVF825)] [Escherichia coli O78:H18 str. WS3294A]	VFG045899 (APECO78_08685) periplasmic pilin chaperone [E.coli laminin-binding fimbriae (ELF) (CVF824)] [Escherichia coli O78:H18 str. WS3294A]	VFG045915 (APECO78_08690) outer membrane usher protein [E.coli laminin-binding fimbriae (ELF) (CVF824)] [Escherichia coli O78:H18 str. WS3294A]	VFG045935 (APECO78_08695) fimbrial-like adhesin protein [E.coli laminin-binding fimbriae (ELF) (CVF824)] [Escherichia coli O78:H18 str. WS3294A]	VFG045983 (CDCO157_0108) hypothetical protein [Hemorrhagic E.coli pilus (HCP) (CVF825)] [Escherichia coli O157:H7 str. Xuzhou21]	VFG045827 (EC958_1421) hemolysin E [Hemolysin/cytolysin A (CVF750)] [Escherichia coli O25b:H4-ST131]				VFG045884 (ECH74115_1101) periplasmic pilus chaperone family protein [E.coli laminin-binding fimbriae (ELF) (CVF824)] [Escherichia coli O157:H7 str. EC4115]				VFG045881 (ECO55CA74_05725) chaperone [E.coli laminin-binding fimbriae (ELF) (CVF824)] [Escherichia coli O55:H7 str. RM12579]	VFG046031 (ECP_0106) type IV pilin biogenesis protein [Hemorrhagic E.coli pilus (HCP) (CVF825)] [Escherichia coli 536]	VFG045993 (ECP_0107) hypothetical protein [Hemorrhagic E.coli pilus (HCP) (CVF825)] [Escherichia coli 536]	VFG045956 (ECP_0108) major pilin subunit [Hemorrhagic E.coli pilus (HCP) (CVF825)] [Escherichia coli 536]	VFG043545_gi:218560235_ (ECS88_3547) lipoprotein NlpI [NlpI (AI331)] [Escherichia coli O45:K1:H7 str. S88]												VFG042095_gi:15832966_ (ECs3712) hypothetical protein [ETT2 (SS017)] [Escherichia coli O157:H7 str. Sakai]	VFG046001 (ETEC_0103) protein transport protein HofB [Hemorrhagic E.coli pilus (HCP) (CVF825)] [Escherichia coli O78:H11:K80 str. H10407]	VFG045896 (ETEC_1007) periplasmic pilin chaperone [E.coli laminin-binding fimbriae (ELF) (CVF824)] [Escherichia coli O78:H11:K80 str. H10407]	VFG045912 (ETEC_1008) fimbrial outer membrane usher protein [E.coli laminin-binding fimbriae (ELF) (CVF824)] [Escherichia coli O78:H11:K80 str. H10407]	VFG045932 (ETEC_1011) fimbrial precursor [E.coli laminin-binding fimbriae (ELF) (CVF824)] [Escherichia coli O78:H11:K80 str. H10407]		VFG045931 (EcE24377A_1056) fimbrial protein [E.coli laminin-binding fimbriae (ELF) (CVF824)] [Escherichia coli E24377A]		VFG045926 (O3M_16610) fimbrial-like adhesin protein [E.coli laminin-binding fimbriae (ELF) (CVF824)] [Escherichia coli O104:H4 str. 2009EL-2050]	VFG045906 (O3M_16615) outer membrane usher protein [E.coli laminin-binding fimbriae (ELF) (CVF824)] [Escherichia coli O104:H4 str. 2009EL-2050]		VFG045950 (O3M_20925) major pilin subunit [Hemorrhagic E.coli pilus (HCP) (CVF825)] [Escherichia coli O104:H4 str. 2009EL-2050]	VFG045987 (O3M_20930) hypothetical protein [Hemorrhagic E.coli pilus (HCP) (CVF825)] [Escherichia coli O104:H4 str. 2009EL-2050]		VFG045897 (UMNK88_1094) chaperone protein FocC [E.coli laminin-binding fimbriae (ELF) (CVF824)] [Escherichia coli UMNK88]	VFG045913 (UMNK88_1095) outer membrane usher protein FimD [E.coli laminin-binding fimbriae (ELF) (CVF824)] [Escherichia coli UMNK88]	VFG045933 (UMNK88_1096) hypothetical protein [E.coli laminin-binding fimbriae (ELF) (CVF824)] [Escherichia coli UMNK88]
ECL17896	VFG046044 (APECO78_03970) type IV pilin biogenesis protein [Hemorrhagic E.coli pilus (HCP) (CVF825)] [Escherichia coli O78:H18 str. WS3294A]	VFG046007 (APECO78_03975) hypothetical protein [Hemorrhagic E.coli pilus (HCP) (CVF825)] [Escherichia coli O78:H18 str. WS3294A]	VFG045899 (APECO78_08685) periplasmic pilin chaperone [E.coli laminin-binding fimbriae (ELF) (CVF824)] [Escherichia coli O78:H18 str. WS3294A]	VFG045915 (APECO78_08690) outer membrane usher protein [E.coli laminin-binding fimbriae (ELF) (CVF824)] [Escherichia coli O78:H18 str. WS3294A]	VFG045935 (APECO78_08695) fimbrial-like adhesin protein [E.coli laminin-binding fimbriae (ELF) (CVF824)] [Escherichia coli O78:H18 str. WS3294A]	VFG045983 (CDCO157_0108) hypothetical protein [Hemorrhagic E.coli pilus (HCP) (CVF825)] [Escherichia coli O157:H7 str. Xuzhou21]	VFG045827 (EC958_1421) hemolysin E [Hemolysin/cytolysin A (CVF750)] [Escherichia coli O25b:H4-ST131]				VFG045884 (ECH74115_1101) periplasmic pilus chaperone family protein [E.coli laminin-binding fimbriae (ELF) (CVF824)] [Escherichia coli O157:H7 str. EC4115]				VFG045881 (ECO55CA74_05725) chaperone [E.coli laminin-binding fimbriae (ELF) (CVF824)] [Escherichia coli O55:H7 str. RM12579]	VFG046031 (ECP_0106) type IV pilin biogenesis protein [Hemorrhagic E.coli pilus (HCP) (CVF825)] [Escherichia coli 536]	VFG045993 (ECP_0107) hypothetical protein [Hemorrhagic E.coli pilus (HCP) (CVF825)] [Escherichia coli 536]	VFG045956 (ECP_0108) major pilin subunit [Hemorrhagic E.coli pilus (HCP) (CVF825)] [Escherichia coli 536]	VFG043545_gi:218560235_ (ECS88_3547) lipoprotein NlpI [NlpI (AI331)] [Escherichia coli O45:K1:H7 str. S88]												VFG042095_gi:15832966_ (ECs3712) hypothetical protein [ETT2 (SS017)] [Escherichia coli O157:H7 str. Sakai]	VFG046001 (ETEC_0103) protein transport protein HofB [Hemorrhagic E.coli pilus (HCP) (CVF825)] [Escherichia coli O78:H11:K80 str. H10407]	VFG045896 (ETEC_1007) periplasmic pilin chaperone [E.coli laminin-binding fimbriae (ELF) (CVF824)] [Escherichia coli O78:H11:K80 str. H10407]	VFG045912 (ETEC_1008) fimbrial outer membrane usher protein [E.coli laminin-binding fimbriae (ELF) (CVF824)] [Escherichia coli O78:H11:K80 str. H10407]	VFG045932 (ETEC_1011) fimbrial precursor [E.coli laminin-binding fimbriae (ELF) (CVF824)] [Escherichia coli O78:H11:K80 str. H10407]		VFG045931 (EcE24377A_1056) fimbrial protein [E.coli laminin-binding fimbriae (ELF) (CVF824)] [Escherichia coli E24377A]		VFG045926 (O3M_16610) fimbrial-like adhesin protein [E.coli laminin-binding fimbriae (ELF) (CVF824)] [Escherichia coli O104:H4 str. 2009EL-2050]	VFG045906 (O3M_16615) outer membrane usher protein [E.coli laminin-binding fimbriae (ELF) (CVF824)] [Escherichia coli O104:H4 str. 2009EL-2050]		VFG045950 (O3M_20925) major pilin subunit [Hemorrhagic E.coli pilus (HCP) (CVF825)] [Escherichia coli O104:H4 str. 2009EL-2050]	VFG045987 (O3M_20930) hypothetical protein [Hemorrhagic E.coli pilus (HCP) (CVF825)] [Escherichia coli O104:H4 str. 2009EL-2050]		VFG045897 (UMNK88_1094) chaperone protein FocC [E.coli laminin-binding fimbriae (ELF) (CVF824)] [Escherichia coli UMNK88]	VFG045913 (UMNK88_1095) outer membrane usher protein FimD [E.coli laminin-binding fimbriae (ELF) (CVF824)] [Escherichia coli UMNK88]	VFG045933 (UMNK88_1096) hypothetical protein [E.coli laminin-binding fimbriae (ELF) (CVF824)] [Escherichia coli UMNK88]
ECL18172	VFG046044 (APECO78_03970) type IV pilin biogenesis protein [Hemorrhagic E.coli pilus (HCP) (CVF825)] [Escherichia coli O78:H18 str. WS3294A]	VFG046007 (APECO78_03975) hypothetical protein [Hemorrhagic E.coli pilus (HCP) (CVF825)] [Escherichia coli O78:H18 str. WS3294A]	VFG045899 (APECO78_08685) periplasmic pilin chaperone [E.coli laminin-binding fimbriae (ELF) (CVF824)] [Escherichia coli O78:H18 str. WS3294A]	VFG045915 (APECO78_08690) outer membrane usher protein [E.coli laminin-binding fimbriae (ELF) (CVF824)] [Escherichia coli O78:H18 str. WS3294A]	VFG045935 (APECO78_08695) fimbrial-like adhesin protein [E.coli laminin-binding fimbriae (ELF) (CVF824)] [Escherichia coli O78:H18 str. WS3294A]	VFG045983 (CDCO157_0108) hypothetical protein [Hemorrhagic E.coli pilus (HCP) (CVF825)] [Escherichia coli O157:H7 str. Xuzhou21]	VFG045827 (EC958_1421) hemolysin E [Hemolysin/cytolysin A (CVF750)] [Escherichia coli O25b:H4-ST131]			VFG045862 (ECH74115_1100) fimbrial protein [E.coli laminin-binding fimbriae (ELF) (CVF824)] [Escherichia coli O157:H7 str. EC4115]	VFG045884 (ECH74115_1101) periplasmic pilus chaperone family protein [E.coli laminin-binding fimbriae (ELF) (CVF824)] [Escherichia coli O157:H7 str. EC4115]	VFG035720_gi:260842456_ (ECO103_0224) hypothetical protein [ACE T6SS (CVF736)] [Escherichia coli O103:H2 str. 12009]	VFG035721_gi:260866370_ (ECO111_0230) hypothetical protein [ACE T6SS (CVF736)] [Escherichia coli O111:H- str. 11128]	VFG045859 (ECO55CA74_05720) putative fimbrial-like adhesin protein [E.coli laminin-binding fimbriae (ELF) (CVF824)] [Escherichia coli O55:H7 str. RM12579]	VFG045881 (ECO55CA74_05725) chaperone [E.coli laminin-binding fimbriae (ELF) (CVF824)] [Escherichia coli O55:H7 str. RM12579]	VFG046031 (ECP_0106) type IV pilin biogenesis protein [Hemorrhagic E.coli pilus (HCP) (CVF825)] [Escherichia coli 536]	VFG045993 (ECP_0107) hypothetical protein [Hemorrhagic E.coli pilus (HCP) (CVF825)] [Escherichia coli 536]	VFG045956 (ECP_0108) major pilin subunit [Hemorrhagic E.coli pilus (HCP) (CVF825)] [Escherichia coli 536]	VFG043545_gi:218560235_ (ECS88_3547) lipoprotein NlpI [NlpI (AI331)] [Escherichia coli O45:K1:H7 str. S88]	VFG046082 (ECVR50_0238) hypothetical protein [ACE T6SS (CVF736)] [Escherichia coli VR50]	VFG046083 (ECVR50_0239) IcmF-related protein [ACE T6SS (CVF736)] [Escherichia coli VR50]	VFG046084 (ECVR50_0240) uncharacterized protein ImpA [ACE T6SS (CVF736)] [Escherichia coli VR50]	VFG046086 (ECVR50_0242) putative protease [ACE T6SS (CVF736)] [Escherichia coli VR50]	VFG046090 (ECVR50_0246) hypothetical protein [ACE T6SS (CVF736)] [Escherichia coli VR50]	VFG046091 (ECVR50_0247) hypothetical protein [ACE T6SS (CVF736)] [Escherichia coli VR50]	VFG046092 (ECVR50_0248) hypothetical protein [ACE T6SS (CVF736)] [Escherichia coli VR50]	VFG046093 (ECVR50_0249) hypothetical protein [ACE T6SS (CVF736)] [Escherichia coli VR50]	VFG046094 (ECVR50_0250) uncharacterized protein ImpC [ACE T6SS (CVF736)] [Escherichia coli VR50]	VFG046096 (ECVR50_0257) hypothetical protein [ACE T6SS (CVF736)] [Escherichia coli VR50]	VFG035711_gi:15829483_ (ECs0229) hypothetical protein [ACE T6SS (CVF736)] [Escherichia coli O157:H7 str. Sakai]	VFG042095_gi:15832966_ (ECs3712) hypothetical protein [ETT2 (SS017)] [Escherichia coli O157:H7 str. Sakai]	VFG046001 (ETEC_0103) protein transport protein HofB [Hemorrhagic E.coli pilus (HCP) (CVF825)] [Escherichia coli O78:H11:K80 str. H10407]	VFG045896 (ETEC_1007) periplasmic pilin chaperone [E.coli laminin-binding fimbriae (ELF) (CVF824)] [Escherichia coli O78:H11:K80 str. H10407]	VFG045912 (ETEC_1008) fimbrial outer membrane usher protein [E.coli laminin-binding fimbriae (ELF) (CVF824)] [Escherichia coli O78:H11:K80 str. H10407]	VFG045932 (ETEC_1011) fimbrial precursor [E.coli laminin-binding fimbriae (ELF) (CVF824)] [Escherichia coli O78:H11:K80 str. H10407]	VFG035728_gi:157155723_ (EcE24377A_0237) hypothetical protein [ACE T6SS (CVF736)] [Escherichia coli E24377A]	VFG045931 (EcE24377A_1056) fimbrial protein [E.coli laminin-binding fimbriae (ELF) (CVF824)] [Escherichia coli E24377A]	VFG035715_gi:291281048_ (G2583_0236) hypothetical protein [ACE T6SS (CVF736)] [Escherichia coli O55:H7 str. CB9615]	VFG045926 (O3M_16610) fimbrial-like adhesin protein [E.coli laminin-binding fimbriae (ELF) (CVF824)] [Escherichia coli O104:H4 str. 2009EL-2050]	VFG045906 (O3M_16615) outer membrane usher protein [E.coli laminin-binding fimbriae (ELF) (CVF824)] [Escherichia coli O104:H4 str. 2009EL-2050]	VFG035722_gi:410484142_ (O3M_20335) type VI secretion system protein ImpG [ACE T6SS (CVF736)] [Escherichia coli O104:H4 str. 2009EL-2050]	VFG045950 (O3M_20925) major pilin subunit [Hemorrhagic E.coli pilus (HCP) (CVF825)] [Escherichia coli O104:H4 str. 2009EL-2050]	VFG045987 (O3M_20930) hypothetical protein [Hemorrhagic E.coli pilus (HCP) (CVF825)] [Escherichia coli O104:H4 str. 2009EL-2050]	VFG045875 (UMNK88_1093) major type 1 subunit fimbrin FimA [E.coli laminin-binding fimbriae (ELF) (CVF824)] [Escherichia coli UMNK88]	VFG045897 (UMNK88_1094) chaperone protein FocC [E.coli laminin-binding fimbriae (ELF) (CVF824)] [Escherichia coli UMNK88]	VFG045913 (UMNK88_1095) outer membrane usher protein FimD [E.coli laminin-binding fimbriae (ELF) (CVF824)] [Escherichia coli UMNK88]	VFG045933 (UMNK88_1096) hypothetical protein [E.coli laminin-binding fimbriae (ELF) (CVF824)] [Escherichia coli UMNK88]	VFG035729_gi:386612389_ (UMNK88_238) hypothetical protein [ACE T6SS (CVF736)] [Escherichia coli UMNK88]	VFG035710_gi:15799909_ (Z0260) hypothetical protein [EHS (SS185)] [Escherichia coli O157:H7 str. EDL933]
ECL18573	VFG046044 (APECO78_03970) type IV pilin biogenesis protein [Hemorrhagic E.coli pilus (HCP) (CVF825)] [Escherichia coli O78:H18 str. WS3294A]	VFG046007 (APECO78_03975) hypothetical protein [Hemorrhagic E.coli pilus (HCP) (CVF825)] [Escherichia coli O78:H18 str. WS3294A]	VFG045899 (APECO78_08685) periplasmic pilin chaperone [E.coli laminin-binding fimbriae (ELF) (CVF824)] [Escherichia coli O78:H18 str. WS3294A]	VFG045915 (APECO78_08690) outer membrane usher protein [E.coli laminin-binding fimbriae (ELF) (CVF824)] [Escherichia coli O78:H18 str. WS3294A]	VFG045935 (APECO78_08695) fimbrial-like adhesin protein [E.coli laminin-binding fimbriae (ELF) (CVF824)] [Escherichia coli O78:H18 str. WS3294A]	VFG045983 (CDCO157_0108) hypothetical protein [Hemorrhagic E.coli pilus (HCP) (CVF825)] [Escherichia coli O157:H7 str. Xuzhou21]	VFG045827 (EC958_1421) hemolysin E [Hemolysin/cytolysin A (CVF750)] [Escherichia coli O25b:H4-ST131]		VFG045826 (EC958_5138) Fluffing protein [Cah, AIDA-I type (CVF745)] [Escherichia coli O25b:H4-ST131]	VFG045862 (ECH74115_1100) fimbrial protein [E.coli laminin-binding fimbriae (ELF) (CVF824)] [Escherichia coli O157:H7 str. EC4115]	VFG045884 (ECH74115_1101) periplasmic pilus chaperone family protein [E.coli laminin-binding fimbriae (ELF) (CVF824)] [Escherichia coli O157:H7 str. EC4115]	VFG035720_gi:260842456_ (ECO103_0224) hypothetical protein [ACE T6SS (CVF736)] [Escherichia coli O103:H2 str. 12009]	VFG035721_gi:260866370_ (ECO111_0230) hypothetical protein [ACE T6SS (CVF736)] [Escherichia coli O111:H- str. 11128]	VFG045859 (ECO55CA74_05720) putative fimbrial-like adhesin protein [E.coli laminin-binding fimbriae (ELF) (CVF824)] [Escherichia coli O55:H7 str. RM12579]	VFG045881 (ECO55CA74_05725) chaperone [E.coli laminin-binding fimbriae (ELF) (CVF824)] [Escherichia coli O55:H7 str. RM12579]	VFG046031 (ECP_0106) type IV pilin biogenesis protein [Hemorrhagic E.coli pilus (HCP) (CVF825)] [Escherichia coli 536]	VFG045993 (ECP_0107) hypothetical protein [Hemorrhagic E.coli pilus (HCP) (CVF825)] [Escherichia coli 536]	VFG045956 (ECP_0108) major pilin subunit [Hemorrhagic E.coli pilus (HCP) (CVF825)] [Escherichia coli 536]	VFG043545_gi:218560235_ (ECS88_3547) lipoprotein NlpI [NlpI (AI331)] [Escherichia coli O45:K1:H7 str. S88]	VFG046082 (ECVR50_0238) hypothetical protein [ACE T6SS (CVF736)] [Escherichia coli VR50]	VFG046083 (ECVR50_0239) IcmF-related protein [ACE T6SS (CVF736)] [Escherichia coli VR50]	VFG046084 (ECVR50_0240) uncharacterized protein ImpA [ACE T6SS (CVF736)] [Escherichia coli VR50]	VFG046086 (ECVR50_0242) putative protease [ACE T6SS (CVF736)] [Escherichia coli VR50]	VFG046090 (ECVR50_0246) hypothetical protein [ACE T6SS (CVF736)] [Escherichia coli VR50]	VFG046091 (ECVR50_0247) hypothetical protein [ACE T6SS (CVF736)] [Escherichia coli VR50]	VFG046092 (ECVR50_0248) hypothetical protein [ACE T6SS (CVF736)] [Escherichia coli VR50]	VFG046093 (ECVR50_0249) hypothetical protein [ACE T6SS (CVF736)] [Escherichia coli VR50]	VFG046094 (ECVR50_0250) uncharacterized protein ImpC [ACE T6SS (CVF736)] [Escherichia coli VR50]	VFG046096 (ECVR50_0257) hypothetical protein [ACE T6SS (CVF736)] [Escherichia coli VR50]	VFG035711_gi:15829483_ (ECs0229) hypothetical protein [ACE T6SS (CVF736)] [Escherichia coli O157:H7 str. Sakai]	VFG042095_gi:15832966_ (ECs3712) hypothetical protein [ETT2 (SS017)] [Escherichia coli O157:H7 str. Sakai]	VFG046001 (ETEC_0103) protein transport protein HofB [Hemorrhagic E.coli pilus (HCP) (CVF825)] [Escherichia coli O78:H11:K80 str. H10407]	VFG045896 (ETEC_1007) periplasmic pilin chaperone [E.coli laminin-binding fimbriae (ELF) (CVF824)] [Escherichia coli O78:H11:K80 str. H10407]	VFG045912 (ETEC_1008) fimbrial outer membrane usher protein [E.coli laminin-binding fimbriae (ELF) (CVF824)] [Escherichia coli O78:H11:K80 str. H10407]	VFG045932 (ETEC_1011) fimbrial precursor [E.coli laminin-binding fimbriae (ELF) (CVF824)] [Escherichia coli O78:H11:K80 str. H10407]	VFG035728_gi:157155723_ (EcE24377A_0237) hypothetical protein [ACE T6SS (CVF736)] [Escherichia coli E24377A]	VFG045931 (EcE24377A_1056) fimbrial protein [E.coli laminin-binding fimbriae (ELF) (CVF824)] [Escherichia coli E24377A]	VFG035715_gi:291281048_ (G2583_0236) hypothetical protein [ACE T6SS (CVF736)] [Escherichia coli O55:H7 str. CB9615]	VFG045926 (O3M_16610) fimbrial-like adhesin protein [E.coli laminin-binding fimbriae (ELF) (CVF824)] [Escherichia coli O104:H4 str. 2009EL-2050]	VFG045906 (O3M_16615) outer membrane usher protein [E.coli laminin-binding fimbriae (ELF) (CVF824)] [Escherichia coli O104:H4 str. 2009EL-2050]	VFG035722_gi:410484142_ (O3M_20335) type VI secretion system protein ImpG [ACE T6SS (CVF736)] [Escherichia coli O104:H4 str. 2009EL-2050]	VFG045950 (O3M_20925) major pilin subunit [Hemorrhagic E.coli pilus (HCP) (CVF825)] [Escherichia coli O104:H4 str. 2009EL-2050]	VFG045987 (O3M_20930) hypothetical protein [Hemorrhagic E.coli pilus (HCP) (CVF825)] [Escherichia coli O104:H4 str. 2009EL-2050]	VFG045875 (UMNK88_1093) major type 1 subunit fimbrin FimA [E.coli laminin-binding fimbriae (ELF) (CVF824)] [Escherichia coli UMNK88]	VFG045897 (UMNK88_1094) chaperone protein FocC [E.coli laminin-binding fimbriae (ELF) (CVF824)] [Escherichia coli UMNK88]	VFG045913 (UMNK88_1095) outer membrane usher protein FimD [E.coli laminin-binding fimbriae (ELF) (CVF824)] [Escherichia coli UMNK88]	VFG045933 (UMNK88_1096) hypothetical protein [E.coli laminin-binding fimbriae (ELF) (CVF824)] [Escherichia coli UMNK88]	VFG035729_gi:386612389_ (UMNK88_238) hypothetical protein [ACE T6SS (CVF736)] [Escherichia coli UMNK88]	VFG035710_gi:15799909_ (Z0260) hypothetical protein [EHS (SS185)] [Escherichia coli O157:H7 str. EDL933]
ECL18728	VFG046044 (APECO78_03970) type IV pilin biogenesis protein [Hemorrhagic E.coli pilus (HCP) (CVF825)] [Escherichia coli O78:H18 str. WS3294A]	VFG046007 (APECO78_03975) hypothetical protein [Hemorrhagic E.coli pilus (HCP) (CVF825)] [Escherichia coli O78:H18 str. WS3294A]	VFG045899 (APECO78_08685) periplasmic pilin chaperone [E.coli laminin-binding fimbriae (ELF) (CVF824)] [Escherichia coli O78:H18 str. WS3294A]	VFG045915 (APECO78_08690) outer membrane usher protein [E.coli laminin-binding fimbriae (ELF) (CVF824)] [Escherichia coli O78:H18 str. WS3294A]	VFG045935 (APECO78_08695) fimbrial-like adhesin protein [E.coli laminin-binding fimbriae (ELF) (CVF824)] [Escherichia coli O78:H18 str. WS3294A]	VFG045983 (CDCO157_0108) hypothetical protein [Hemorrhagic E.coli pilus (HCP) (CVF825)] [Escherichia coli O157:H7 str. Xuzhou21]	VFG045827 (EC958_1421) hemolysin E [Hemolysin/cytolysin A (CVF750)] [Escherichia coli O25b:H4-ST131]	VFG045820 (EC958_4121) putative autotransporter [AIDA-I (CVF450)] [Escherichia coli O25b:H4-ST131]	VFG045826 (EC958_5138) Fluffing protein [Cah, AIDA-I type (CVF745)] [Escherichia coli O25b:H4-ST131]	VFG045862 (ECH74115_1100) fimbrial protein [E.coli laminin-binding fimbriae (ELF) (CVF824)] [Escherichia coli O157:H7 str. EC4115]	VFG045884 (ECH74115_1101) periplasmic pilus chaperone family protein [E.coli laminin-binding fimbriae (ELF) (CVF824)] [Escherichia coli O157:H7 str. EC4115]	VFG035720_gi:260842456_ (ECO103_0224) hypothetical protein [ACE T6SS (CVF736)] [Escherichia coli O103:H2 str. 12009]	VFG035721_gi:260866370_ (ECO111_0230) hypothetical protein [ACE T6SS (CVF736)] [Escherichia coli O111:H- str. 11128]	VFG045859 (ECO55CA74_05720) putative fimbrial-like adhesin protein [E.coli laminin-binding fimbriae (ELF) (CVF824)] [Escherichia coli O55:H7 str. RM12579]	VFG045881 (ECO55CA74_05725) chaperone [E.coli laminin-binding fimbriae (ELF) (CVF824)] [Escherichia coli O55:H7 str. RM12579]	VFG046031 (ECP_0106) type IV pilin biogenesis protein [Hemorrhagic E.coli pilus (HCP) (CVF825)] [Escherichia coli 536]	VFG045993 (ECP_0107) hypothetical protein [Hemorrhagic E.coli pilus (HCP) (CVF825)] [Escherichia coli 536]	VFG045956 (ECP_0108) major pilin subunit [Hemorrhagic E.coli pilus (HCP) (CVF825)] [Escherichia coli 536]	VFG043545_gi:218560235_ (ECS88_3547) lipoprotein NlpI [NlpI (AI331)] [Escherichia coli O45:K1:H7 str. S88]	VFG046082 (ECVR50_0238) hypothetical protein [ACE T6SS (CVF736)] [Escherichia coli VR50]	VFG046083 (ECVR50_0239) IcmF-related protein [ACE T6SS (CVF736)] [Escherichia coli VR50]	VFG046084 (ECVR50_0240) uncharacterized protein ImpA [ACE T6SS (CVF736)] [Escherichia coli VR50]	VFG046086 (ECVR50_0242) putative protease [ACE T6SS (CVF736)] [Escherichia coli VR50]	VFG046090 (ECVR50_0246) hypothetical protein [ACE T6SS (CVF736)] [Escherichia coli VR50]	VFG046091 (ECVR50_0247) hypothetical protein [ACE T6SS (CVF736)] [Escherichia coli VR50]	VFG046092 (ECVR50_0248) hypothetical protein [ACE T6SS (CVF736)] [Escherichia coli VR50]	VFG046093 (ECVR50_0249) hypothetical protein [ACE T6SS (CVF736)] [Escherichia coli VR50]	VFG046094 (ECVR50_0250) uncharacterized protein ImpC [ACE T6SS (CVF736)] [Escherichia coli VR50]	VFG046096 (ECVR50_0257) hypothetical protein [ACE T6SS (CVF736)] [Escherichia coli VR50]	VFG035711_gi:15829483_ (ECs0229) hypothetical protein [ACE T6SS (CVF736)] [Escherichia coli O157:H7 str. Sakai]	VFG042095_gi:15832966_ (ECs3712) hypothetical protein [ETT2 (SS017)] [Escherichia coli O157:H7 str. Sakai]	VFG046001 (ETEC_0103) protein transport protein HofB [Hemorrhagic E.coli pilus (HCP) (CVF825)] [Escherichia coli O78:H11:K80 str. H10407]	VFG045896 (ETEC_1007) periplasmic pilin chaperone [E.coli laminin-binding fimbriae (ELF) (CVF824)] [Escherichia coli O78:H11:K80 str. H10407]	VFG045912 (ETEC_1008) fimbrial outer membrane usher protein [E.coli laminin-binding fimbriae (ELF) (CVF824)] [Escherichia coli O78:H11:K80 str. H10407]	VFG045932 (ETEC_1011) fimbrial precursor [E.coli laminin-binding fimbriae (ELF) (CVF824)] [Escherichia coli O78:H11:K80 str. H10407]	VFG035728_gi:157155723_ (EcE24377A_0237) hypothetical protein [ACE T6SS (CVF736)] [Escherichia coli E24377A]	VFG045931 (EcE24377A_1056) fimbrial protein [E.coli laminin-binding fimbriae (ELF) (CVF824)] [Escherichia coli E24377A]	VFG035715_gi:291281048_ (G2583_0236) hypothetical protein [ACE T6SS (CVF736)] [Escherichia coli O55:H7 str. CB9615]	VFG045926 (O3M_16610) fimbrial-like adhesin protein [E.coli laminin-binding fimbriae (ELF) (CVF824)] [Escherichia coli O104:H4 str. 2009EL-2050]	VFG045906 (O3M_16615) outer membrane usher protein [E.coli laminin-binding fimbriae (ELF) (CVF824)] [Escherichia coli O104:H4 str. 2009EL-2050]	VFG035722_gi:410484142_ (O3M_20335) type VI secretion system protein ImpG [ACE T6SS (CVF736)] [Escherichia coli O104:H4 str. 2009EL-2050]	VFG045950 (O3M_20925) major pilin subunit [Hemorrhagic E.coli pilus (HCP) (CVF825)] [Escherichia coli O104:H4 str. 2009EL-2050]	VFG045987 (O3M_20930) hypothetical protein [Hemorrhagic E.coli pilus (HCP) (CVF825)] [Escherichia coli O104:H4 str. 2009EL-2050]	VFG045875 (UMNK88_1093) major type 1 subunit fimbrin FimA [E.coli laminin-binding fimbriae (ELF) (CVF824)] [Escherichia coli UMNK88]	VFG045897 (UMNK88_1094) chaperone protein FocC [E.coli laminin-binding fimbriae (ELF) (CVF824)] [Escherichia coli UMNK88]	VFG045913 (UMNK88_1095) outer membrane usher protein FimD [E.coli laminin-binding fimbriae (ELF) (CVF824)] [Escherichia coli UMNK88]	VFG045933 (UMNK88_1096) hypothetical protein [E.coli laminin-binding fimbriae (ELF) (CVF824)] [Escherichia coli UMNK88]	VFG035729_gi:386612389_ (UMNK88_238) hypothetical protein [ACE T6SS (CVF736)] [Escherichia coli UMNK88]	VFG035710_gi:15799909_ (Z0260) hypothetical protein [EHS (SS185)] [Escherichia coli O157:H7 str. EDL933]
ECL19125	VFG046044 (APECO78_03970) type IV pilin biogenesis protein [Hemorrhagic E.coli pilus (HCP) (CVF825)] [Escherichia coli O78:H18 str. WS3294A]	VFG046007 (APECO78_03975) hypothetical protein [Hemorrhagic E.coli pilus (HCP) (CVF825)] [Escherichia coli O78:H18 str. WS3294A]	VFG045899 (APECO78_08685) periplasmic pilin chaperone [E.coli laminin-binding fimbriae (ELF) (CVF824)] [Escherichia coli O78:H18 str. WS3294A]	VFG045915 (APECO78_08690) outer membrane usher protein [E.coli laminin-binding fimbriae (ELF) (CVF824)] [Escherichia coli O78:H18 str. WS3294A]	VFG045935 (APECO78_08695) fimbrial-like adhesin protein [E.coli laminin-binding fimbriae (ELF) (CVF824)] [Escherichia coli O78:H18 str. WS3294A]	VFG045983 (CDCO157_0108) hypothetical protein [Hemorrhagic E.coli pilus (HCP) (CVF825)] [Escherichia coli O157:H7 str. Xuzhou21]	VFG045827 (EC958_1421) hemolysin E [Hemolysin/cytolysin A (CVF750)] [Escherichia coli O25b:H4-ST131]		VFG045826 (EC958_5138) Fluffing protein [Cah, AIDA-I type (CVF745)] [Escherichia coli O25b:H4-ST131]	VFG045862 (ECH74115_1100) fimbrial protein [E.coli laminin-binding fimbriae (ELF) (CVF824)] [Escherichia coli O157:H7 str. EC4115]	VFG045884 (ECH74115_1101) periplasmic pilus chaperone family protein [E.coli laminin-binding fimbriae (ELF) (CVF824)] [Escherichia coli O157:H7 str. EC4115]	VFG035720_gi:260842456_ (ECO103_0224) hypothetical protein [ACE T6SS (CVF736)] [Escherichia coli O103:H2 str. 12009]	VFG035721_gi:260866370_ (ECO111_0230) hypothetical protein [ACE T6SS (CVF736)] [Escherichia coli O111:H- str. 11128]	VFG045859 (ECO55CA74_05720) putative fimbrial-like adhesin protein [E.coli laminin-binding fimbriae (ELF) (CVF824)] [Escherichia coli O55:H7 str. RM12579]	VFG045881 (ECO55CA74_05725) chaperone [E.coli laminin-binding fimbriae (ELF) (CVF824)] [Escherichia coli O55:H7 str. RM12579]	VFG046031 (ECP_0106) type IV pilin biogenesis protein [Hemorrhagic E.coli pilus (HCP) (CVF825)] [Escherichia coli 536]	VFG045993 (ECP_0107) hypothetical protein [Hemorrhagic E.coli pilus (HCP) (CVF825)] [Escherichia coli 536]	VFG045956 (ECP_0108) major pilin subunit [Hemorrhagic E.coli pilus (HCP) (CVF825)] [Escherichia coli 536]	VFG043545_gi:218560235_ (ECS88_3547) lipoprotein NlpI [NlpI (AI331)] [Escherichia coli O45:K1:H7 str. S88]	VFG046082 (ECVR50_0238) hypothetical protein [ACE T6SS (CVF736)] [Escherichia coli VR50]	VFG046083 (ECVR50_0239) IcmF-related protein [ACE T6SS (CVF736)] [Escherichia coli VR50]	VFG046084 (ECVR50_0240) uncharacterized protein ImpA [ACE T6SS (CVF736)] [Escherichia coli VR50]	VFG046086 (ECVR50_0242) putative protease [ACE T6SS (CVF736)] [Escherichia coli VR50]	VFG046090 (ECVR50_0246) hypothetical protein [ACE T6SS (CVF736)] [Escherichia coli VR50]	VFG046091 (ECVR50_0247) hypothetical protein [ACE T6SS (CVF736)] [Escherichia coli VR50]	VFG046092 (ECVR50_0248) hypothetical protein [ACE T6SS (CVF736)] [Escherichia coli VR50]	VFG046093 (ECVR50_0249) hypothetical protein [ACE T6SS (CVF736)] [Escherichia coli VR50]	VFG046094 (ECVR50_0250) uncharacterized protein ImpC [ACE T6SS (CVF736)] [Escherichia coli VR50]	VFG046096 (ECVR50_0257) hypothetical protein [ACE T6SS (CVF736)] [Escherichia coli VR50]	VFG035711_gi:15829483_ (ECs0229) hypothetical protein [ACE T6SS (CVF736)] [Escherichia coli O157:H7 str. Sakai]	VFG042095_gi:15832966_ (ECs3712) hypothetical protein [ETT2 (SS017)] [Escherichia coli O157:H7 str. Sakai]	VFG046001 (ETEC_0103) protein transport protein HofB [Hemorrhagic E.coli pilus (HCP) (CVF825)] [Escherichia coli O78:H11:K80 str. H10407]	VFG045896 (ETEC_1007) periplasmic pilin chaperone [E.coli laminin-binding fimbriae (ELF) (CVF824)] [Escherichia coli O78:H11:K80 str. H10407]	VFG045912 (ETEC_1008) fimbrial outer membrane usher protein [E.coli laminin-binding fimbriae (ELF) (CVF824)] [Escherichia coli O78:H11:K80 str. H10407]	VFG045932 (ETEC_1011) fimbrial precursor [E.coli laminin-binding fimbriae (ELF) (CVF824)] [Escherichia coli O78:H11:K80 str. H10407]	VFG035728_gi:157155723_ (EcE24377A_0237) hypothetical protein [ACE T6SS (CVF736)] [Escherichia coli E24377A]	VFG045931 (EcE24377A_1056) fimbrial protein [E.coli laminin-binding fimbriae (ELF) (CVF824)] [Escherichia coli E24377A]	VFG035715_gi:291281048_ (G2583_0236) hypothetical protein [ACE T6SS (CVF736)] [Escherichia coli O55:H7 str. CB9615]	VFG045926 (O3M_16610) fimbrial-like adhesin protein [E.coli laminin-binding fimbriae (ELF) (CVF824)] [Escherichia coli O104:H4 str. 2009EL-2050]	VFG045906 (O3M_16615) outer membrane usher protein [E.coli laminin-binding fimbriae (ELF) (CVF824)] [Escherichia coli O104:H4 str. 2009EL-2050]	VFG035722_gi:410484142_ (O3M_20335) type VI secretion system protein ImpG [ACE T6SS (CVF736)] [Escherichia coli O104:H4 str. 2009EL-2050]	VFG045950 (O3M_20925) major pilin subunit [Hemorrhagic E.coli pilus (HCP) (CVF825)] [Escherichia coli O104:H4 str. 2009EL-2050]	VFG045987 (O3M_20930) hypothetical protein [Hemorrhagic E.coli pilus (HCP) (CVF825)] [Escherichia coli O104:H4 str. 2009EL-2050]	VFG045875 (UMNK88_1093) major type 1 subunit fimbrin FimA [E.coli laminin-binding fimbriae (ELF) (CVF824)] [Escherichia coli UMNK88]	VFG045897 (UMNK88_1094) chaperone protein FocC [E.coli laminin-binding fimbriae (ELF) (CVF824)] [Escherichia coli UMNK88]	VFG045913 (UMNK88_1095) outer membrane usher protein FimD [E.coli laminin-binding fimbriae (ELF) (CVF824)] [Escherichia coli UMNK88]	VFG045933 (UMNK88_1096) hypothetical protein [E.coli laminin-binding fimbriae (ELF) (CVF824)] [Escherichia coli UMNK88]	VFG035729_gi:386612389_ (UMNK88_238) hypothetical protein [ACE T6SS (CVF736)] [Escherichia coli UMNK88]	VFG035710_gi:15799909_ (Z0260) hypothetical protein [EHS (SS185)] [Escherichia coli O157:H7 str. EDL933]
ECL19146	VFG046044 (APECO78_03970) type IV pilin biogenesis protein [Hemorrhagic E.coli pilus (HCP) (CVF825)] [Escherichia coli O78:H18 str. WS3294A]	VFG046007 (APECO78_03975) hypothetical protein [Hemorrhagic E.coli pilus (HCP) (CVF825)] [Escherichia coli O78:H18 str. WS3294A]	VFG045899 (APECO78_08685) periplasmic pilin chaperone [E.coli laminin-binding fimbriae (ELF) (CVF824)] [Escherichia coli O78:H18 str. WS3294A]	VFG045915 (APECO78_08690) outer membrane usher protein [E.coli laminin-binding fimbriae (ELF) (CVF824)] [Escherichia coli O78:H18 str. WS3294A]	VFG045935 (APECO78_08695) fimbrial-like adhesin protein [E.coli laminin-binding fimbriae (ELF) (CVF824)] [Escherichia coli O78:H18 str. WS3294A]	VFG045983 (CDCO157_0108) hypothetical protein [Hemorrhagic E.coli pilus (HCP) (CVF825)] [Escherichia coli O157:H7 str. Xuzhou21]	VFG045827 (EC958_1421) hemolysin E [Hemolysin/cytolysin A (CVF750)] [Escherichia coli O25b:H4-ST131]		VFG045826 (EC958_5138) Fluffing protein [Cah, AIDA-I type (CVF745)] [Escherichia coli O25b:H4-ST131]	VFG045862 (ECH74115_1100) fimbrial protein [E.coli laminin-binding fimbriae (ELF) (CVF824)] [Escherichia coli O157:H7 str. EC4115]	VFG045884 (ECH74115_1101) periplasmic pilus chaperone family protein [E.coli laminin-binding fimbriae (ELF) (CVF824)] [Escherichia coli O157:H7 str. EC4115]	VFG035720_gi:260842456_ (ECO103_0224) hypothetical protein [ACE T6SS (CVF736)] [Escherichia coli O103:H2 str. 12009]	VFG035721_gi:260866370_ (ECO111_0230) hypothetical protein [ACE T6SS (CVF736)] [Escherichia coli O111:H- str. 11128]	VFG045859 (ECO55CA74_05720) putative fimbrial-like adhesin protein [E.coli laminin-binding fimbriae (ELF) (CVF824)] [Escherichia coli O55:H7 str. RM12579]	VFG045881 (ECO55CA74_05725) chaperone [E.coli laminin-binding fimbriae (ELF) (CVF824)] [Escherichia coli O55:H7 str. RM12579]	VFG046031 (ECP_0106) type IV pilin biogenesis protein [Hemorrhagic E.coli pilus (HCP) (CVF825)] [Escherichia coli 536]	VFG045993 (ECP_0107) hypothetical protein [Hemorrhagic E.coli pilus (HCP) (CVF825)] [Escherichia coli 536]	VFG045956 (ECP_0108) major pilin subunit [Hemorrhagic E.coli pilus (HCP) (CVF825)] [Escherichia coli 536]	VFG043545_gi:218560235_ (ECS88_3547) lipoprotein NlpI [NlpI (AI331)] [Escherichia coli O45:K1:H7 str. S88]	VFG046082 (ECVR50_0238) hypothetical protein [ACE T6SS (CVF736)] [Escherichia coli VR50]	VFG046083 (ECVR50_0239) IcmF-related protein [ACE T6SS (CVF736)] [Escherichia coli VR50]	VFG046084 (ECVR50_0240) uncharacterized protein ImpA [ACE T6SS (CVF736)] [Escherichia coli VR50]	VFG046086 (ECVR50_0242) putative protease [ACE T6SS (CVF736)] [Escherichia coli VR50]	VFG046090 (ECVR50_0246) hypothetical protein [ACE T6SS (CVF736)] [Escherichia coli VR50]	VFG046091 (ECVR50_0247) hypothetical protein [ACE T6SS (CVF736)] [Escherichia coli VR50]	VFG046092 (ECVR50_0248) hypothetical protein [ACE T6SS (CVF736)] [Escherichia coli VR50]	VFG046093 (ECVR50_0249) hypothetical protein [ACE T6SS (CVF736)] [Escherichia coli VR50]	VFG046094 (ECVR50_0250) uncharacterized protein ImpC [ACE T6SS (CVF736)] [Escherichia coli VR50]	VFG046096 (ECVR50_0257) hypothetical protein [ACE T6SS (CVF736)] [Escherichia coli VR50]	VFG035711_gi:15829483_ (ECs0229) hypothetical protein [ACE T6SS (CVF736)] [Escherichia coli O157:H7 str. Sakai]	VFG042095_gi:15832966_ (ECs3712) hypothetical protein [ETT2 (SS017)] [Escherichia coli O157:H7 str. Sakai]	VFG046001 (ETEC_0103) protein transport protein HofB [Hemorrhagic E.coli pilus (HCP) (CVF825)] [Escherichia coli O78:H11:K80 str. H10407]	VFG045896 (ETEC_1007) periplasmic pilin chaperone [E.coli laminin-binding fimbriae (ELF) (CVF824)] [Escherichia coli O78:H11:K80 str. H10407]	VFG045912 (ETEC_1008) fimbrial outer membrane usher protein [E.coli laminin-binding fimbriae (ELF) (CVF824)] [Escherichia coli O78:H11:K80 str. H10407]	VFG045932 (ETEC_1011) fimbrial precursor [E.coli laminin-binding fimbriae (ELF) (CVF824)] [Escherichia coli O78:H11:K80 str. H10407]	VFG035728_gi:157155723_ (EcE24377A_0237) hypothetical protein [ACE T6SS (CVF736)] [Escherichia coli E24377A]	VFG045931 (EcE24377A_1056) fimbrial protein [E.coli laminin-binding fimbriae (ELF) (CVF824)] [Escherichia coli E24377A]	VFG035715_gi:291281048_ (G2583_0236) hypothetical protein [ACE T6SS (CVF736)] [Escherichia coli O55:H7 str. CB9615]	VFG045926 (O3M_16610) fimbrial-like adhesin protein [E.coli laminin-binding fimbriae (ELF) (CVF824)] [Escherichia coli O104:H4 str. 2009EL-2050]	VFG045906 (O3M_16615) outer membrane usher protein [E.coli laminin-binding fimbriae (ELF) (CVF824)] [Escherichia coli O104:H4 str. 2009EL-2050]	VFG035722_gi:410484142_ (O3M_20335) type VI secretion system protein ImpG [ACE T6SS (CVF736)] [Escherichia coli O104:H4 str. 2009EL-2050]	VFG045950 (O3M_20925) major pilin subunit [Hemorrhagic E.coli pilus (HCP) (CVF825)] [Escherichia coli O104:H4 str. 2009EL-2050]	VFG045987 (O3M_20930) hypothetical protein [Hemorrhagic E.coli pilus (HCP) (CVF825)] [Escherichia coli O104:H4 str. 2009EL-2050]	VFG045875 (UMNK88_1093) major type 1 subunit fimbrin FimA [E.coli laminin-binding fimbriae (ELF) (CVF824)] [Escherichia coli UMNK88]	VFG045897 (UMNK88_1094) chaperone protein FocC [E.coli laminin-binding fimbriae (ELF) (CVF824)] [Escherichia coli UMNK88]	VFG045913 (UMNK88_1095) outer membrane usher protein FimD [E.coli laminin-binding fimbriae (ELF) (CVF824)] [Escherichia coli UMNK88]	VFG045933 (UMNK88_1096) hypothetical protein [E.coli laminin-binding fimbriae (ELF) (CVF824)] [Escherichia coli UMNK88]	VFG035729_gi:386612389_ (UMNK88_238) hypothetical protein [ACE T6SS (CVF736)] [Escherichia coli UMNK88]	VFG035710_gi:15799909_ (Z0260) hypothetical protein [EHS (SS185)] [Escherichia coli O157:H7 str. EDL933]
ECL19148	VFG046044 (APECO78_03970) type IV pilin biogenesis protein [Hemorrhagic E.coli pilus (HCP) (CVF825)] [Escherichia coli O78:H18 str. WS3294A]	VFG046007 (APECO78_03975) hypothetical protein [Hemorrhagic E.coli pilus (HCP) (CVF825)] [Escherichia coli O78:H18 str. WS3294A]	VFG045899 (APECO78_08685) periplasmic pilin chaperone [E.coli laminin-binding fimbriae (ELF) (CVF824)] [Escherichia coli O78:H18 str. WS3294A]	VFG045915 (APECO78_08690) outer membrane usher protein [E.coli laminin-binding fimbriae (ELF) (CVF824)] [Escherichia coli O78:H18 str. WS3294A]	VFG045935 (APECO78_08695) fimbrial-like adhesin protein [E.coli laminin-binding fimbriae (ELF) (CVF824)] [Escherichia coli O78:H18 str. WS3294A]	VFG045983 (CDCO157_0108) hypothetical protein [Hemorrhagic E.coli pilus (HCP) (CVF825)] [Escherichia coli O157:H7 str. Xuzhou21]	VFG045827 (EC958_1421) hemolysin E [Hemolysin/cytolysin A (CVF750)] [Escherichia coli O25b:H4-ST131]				VFG045884 (ECH74115_1101) periplasmic pilus chaperone family protein [E.coli laminin-binding fimbriae (ELF) (CVF824)] [Escherichia coli O157:H7 str. EC4115]				VFG045881 (ECO55CA74_05725) chaperone [E.coli laminin-binding fimbriae (ELF) (CVF824)] [Escherichia coli O55:H7 str. RM12579]	VFG046031 (ECP_0106) type IV pilin biogenesis protein [Hemorrhagic E.coli pilus (HCP) (CVF825)] [Escherichia coli 536]	VFG045993 (ECP_0107) hypothetical protein [Hemorrhagic E.coli pilus (HCP) (CVF825)] [Escherichia coli 536]	VFG045956 (ECP_0108) major pilin subunit [Hemorrhagic E.coli pilus (HCP) (CVF825)] [Escherichia coli 536]	VFG043545_gi:218560235_ (ECS88_3547) lipoprotein NlpI [NlpI (AI331)] [Escherichia coli O45:K1:H7 str. S88]												VFG042095_gi:15832966_ (ECs3712) hypothetical protein [ETT2 (SS017)] [Escherichia coli O157:H7 str. Sakai]	VFG046001 (ETEC_0103) protein transport protein HofB [Hemorrhagic E.coli pilus (HCP) (CVF825)] [Escherichia coli O78:H11:K80 str. H10407]	VFG045896 (ETEC_1007) periplasmic pilin chaperone [E.coli laminin-binding fimbriae (ELF) (CVF824)] [Escherichia coli O78:H11:K80 str. H10407]	VFG045912 (ETEC_1008) fimbrial outer membrane usher protein [E.coli laminin-binding fimbriae (ELF) (CVF824)] [Escherichia coli O78:H11:K80 str. H10407]	VFG045932 (ETEC_1011) fimbrial precursor [E.coli laminin-binding fimbriae (ELF) (CVF824)] [Escherichia coli O78:H11:K80 str. H10407]		VFG045931 (EcE24377A_1056) fimbrial protein [E.coli laminin-binding fimbriae (ELF) (CVF824)] [Escherichia coli E24377A]		VFG045926 (O3M_16610) fimbrial-like adhesin protein [E.coli laminin-binding fimbriae (ELF) (CVF824)] [Escherichia coli O104:H4 str. 2009EL-2050]	VFG045906 (O3M_16615) outer membrane usher protein [E.coli laminin-binding fimbriae (ELF) (CVF824)] [Escherichia coli O104:H4 str. 2009EL-2050]		VFG045950 (O3M_20925) major pilin subunit [Hemorrhagic E.coli pilus (HCP) (CVF825)] [Escherichia coli O104:H4 str. 2009EL-2050]	VFG045987 (O3M_20930) hypothetical protein [Hemorrhagic E.coli pilus (HCP) (CVF825)] [Escherichia coli O104:H4 str. 2009EL-2050]		VFG045897 (UMNK88_1094) chaperone protein FocC [E.coli laminin-binding fimbriae (ELF) (CVF824)] [Escherichia coli UMNK88]	VFG045913 (UMNK88_1095) outer membrane usher protein FimD [E.coli laminin-binding fimbriae (ELF) (CVF824)] [Escherichia coli UMNK88]	VFG045933 (UMNK88_1096) hypothetical protein [E.coli laminin-binding fimbriae (ELF) (CVF824)] [Escherichia coli UMNK88]
ECL19153	VFG046044 (APECO78_03970) type IV pilin biogenesis protein [Hemorrhagic E.coli pilus (HCP) (CVF825)] [Escherichia coli O78:H18 str. WS3294A]	VFG046007 (APECO78_03975) hypothetical protein [Hemorrhagic E.coli pilus (HCP) (CVF825)] [Escherichia coli O78:H18 str. WS3294A]	VFG045899 (APECO78_08685) periplasmic pilin chaperone [E.coli laminin-binding fimbriae (ELF) (CVF824)] [Escherichia coli O78:H18 str. WS3294A]	VFG045915 (APECO78_08690) outer membrane usher protein [E.coli laminin-binding fimbriae (ELF) (CVF824)] [Escherichia coli O78:H18 str. WS3294A]	VFG045935 (APECO78_08695) fimbrial-like adhesin protein [E.coli laminin-binding fimbriae (ELF) (CVF824)] [Escherichia coli O78:H18 str. WS3294A]	VFG045983 (CDCO157_0108) hypothetical protein [Hemorrhagic E.coli pilus (HCP) (CVF825)] [Escherichia coli O157:H7 str. Xuzhou21]	VFG045827 (EC958_1421) hemolysin E [Hemolysin/cytolysin A (CVF750)] [Escherichia coli O25b:H4-ST131]				VFG045884 (ECH74115_1101) periplasmic pilus chaperone family protein [E.coli laminin-binding fimbriae (ELF) (CVF824)] [Escherichia coli O157:H7 str. EC4115]				VFG045881 (ECO55CA74_05725) chaperone [E.coli laminin-binding fimbriae (ELF) (CVF824)] [Escherichia coli O55:H7 str. RM12579]	VFG046031 (ECP_0106) type IV pilin biogenesis protein [Hemorrhagic E.coli pilus (HCP) (CVF825)] [Escherichia coli 536]	VFG045993 (ECP_0107) hypothetical protein [Hemorrhagic E.coli pilus (HCP) (CVF825)] [Escherichia coli 536]	VFG045956 (ECP_0108) major pilin subunit [Hemorrhagic E.coli pilus (HCP) (CVF825)] [Escherichia coli 536]	VFG043545_gi:218560235_ (ECS88_3547) lipoprotein NlpI [NlpI (AI331)] [Escherichia coli O45:K1:H7 str. S88]												VFG042095_gi:15832966_ (ECs3712) hypothetical protein [ETT2 (SS017)] [Escherichia coli O157:H7 str. Sakai]	VFG046001 (ETEC_0103) protein transport protein HofB [Hemorrhagic E.coli pilus (HCP) (CVF825)] [Escherichia coli O78:H11:K80 str. H10407]	VFG045896 (ETEC_1007) periplasmic pilin chaperone [E.coli laminin-binding fimbriae (ELF) (CVF824)] [Escherichia coli O78:H11:K80 str. H10407]	VFG045912 (ETEC_1008) fimbrial outer membrane usher protein [E.coli laminin-binding fimbriae (ELF) (CVF824)] [Escherichia coli O78:H11:K80 str. H10407]	VFG045932 (ETEC_1011) fimbrial precursor [E.coli laminin-binding fimbriae (ELF) (CVF824)] [Escherichia coli O78:H11:K80 str. H10407]		VFG045931 (EcE24377A_1056) fimbrial protein [E.coli laminin-binding fimbriae (ELF) (CVF824)] [Escherichia coli E24377A]		VFG045926 (O3M_16610) fimbrial-like adhesin protein [E.coli laminin-binding fimbriae (ELF) (CVF824)] [Escherichia coli O104:H4 str. 2009EL-2050]	VFG045906 (O3M_16615) outer membrane usher protein [E.coli laminin-binding fimbriae (ELF) (CVF824)] [Escherichia coli O104:H4 str. 2009EL-2050]		VFG045950 (O3M_20925) major pilin subunit [Hemorrhagic E.coli pilus (HCP) (CVF825)] [Escherichia coli O104:H4 str. 2009EL-2050]	VFG045987 (O3M_20930) hypothetical protein [Hemorrhagic E.coli pilus (HCP) (CVF825)] [Escherichia coli O104:H4 str. 2009EL-2050]		VFG045897 (UMNK88_1094) chaperone protein FocC [E.coli laminin-binding fimbriae (ELF) (CVF824)] [Escherichia coli UMNK88]	VFG045913 (UMNK88_1095) outer membrane usher protein FimD [E.coli laminin-binding fimbriae (ELF) (CVF824)] [Escherichia coli UMNK88]	VFG045933 (UMNK88_1096) hypothetical protein [E.coli laminin-binding fimbriae (ELF) (CVF824)] [Escherichia coli UMNK88]
ECL19159	VFG046044 (APECO78_03970) type IV pilin biogenesis protein [Hemorrhagic E.coli pilus (HCP) (CVF825)] [Escherichia coli O78:H18 str. WS3294A]	VFG046007 (APECO78_03975) hypothetical protein [Hemorrhagic E.coli pilus (HCP) (CVF825)] [Escherichia coli O78:H18 str. WS3294A]	VFG045899 (APECO78_08685) periplasmic pilin chaperone [E.coli laminin-binding fimbriae (ELF) (CVF824)] [Escherichia coli O78:H18 str. WS3294A]	VFG045915 (APECO78_08690) outer membrane usher protein [E.coli laminin-binding fimbriae (ELF) (CVF824)] [Escherichia coli O78:H18 str. WS3294A]	VFG045935 (APECO78_08695) fimbrial-like adhesin protein [E.coli laminin-binding fimbriae (ELF) (CVF824)] [Escherichia coli O78:H18 str. WS3294A]	VFG045983 (CDCO157_0108) hypothetical protein [Hemorrhagic E.coli pilus (HCP) (CVF825)] [Escherichia coli O157:H7 str. Xuzhou21]	VFG045827 (EC958_1421) hemolysin E [Hemolysin/cytolysin A (CVF750)] [Escherichia coli O25b:H4-ST131]		VFG045826 (EC958_5138) Fluffing protein [Cah, AIDA-I type (CVF745)] [Escherichia coli O25b:H4-ST131]	VFG045862 (ECH74115_1100) fimbrial protein [E.coli laminin-binding fimbriae (ELF) (CVF824)] [Escherichia coli O157:H7 str. EC4115]	VFG045884 (ECH74115_1101) periplasmic pilus chaperone family protein [E.coli laminin-binding fimbriae (ELF) (CVF824)] [Escherichia coli O157:H7 str. EC4115]	VFG035720_gi:260842456_ (ECO103_0224) hypothetical protein [ACE T6SS (CVF736)] [Escherichia coli O103:H2 str. 12009]	VFG035721_gi:260866370_ (ECO111_0230) hypothetical protein [ACE T6SS (CVF736)] [Escherichia coli O111:H- str. 11128]	VFG045859 (ECO55CA74_05720) putative fimbrial-like adhesin protein [E.coli laminin-binding fimbriae (ELF) (CVF824)] [Escherichia coli O55:H7 str. RM12579]	VFG045881 (ECO55CA74_05725) chaperone [E.coli laminin-binding fimbriae (ELF) (CVF824)] [Escherichia coli O55:H7 str. RM12579]	VFG046031 (ECP_0106) type IV pilin biogenesis protein [Hemorrhagic E.coli pilus (HCP) (CVF825)] [Escherichia coli 536]	VFG045993 (ECP_0107) hypothetical protein [Hemorrhagic E.coli pilus (HCP) (CVF825)] [Escherichia coli 536]	VFG045956 (ECP_0108) major pilin subunit [Hemorrhagic E.coli pilus (HCP) (CVF825)] [Escherichia coli 536]	VFG043545_gi:218560235_ (ECS88_3547) lipoprotein NlpI [NlpI (AI331)] [Escherichia coli O45:K1:H7 str. S88]	VFG046082 (ECVR50_0238) hypothetical protein [ACE T6SS (CVF736)] [Escherichia coli VR50]	VFG046083 (ECVR50_0239) IcmF-related protein [ACE T6SS (CVF736)] [Escherichia coli VR50]	VFG046084 (ECVR50_0240) uncharacterized protein ImpA [ACE T6SS (CVF736)] [Escherichia coli VR50]	VFG046086 (ECVR50_0242) putative protease [ACE T6SS (CVF736)] [Escherichia coli VR50]	VFG046090 (ECVR50_0246) hypothetical protein [ACE T6SS (CVF736)] [Escherichia coli VR50]	VFG046091 (ECVR50_0247) hypothetical protein [ACE T6SS (CVF736)] [Escherichia coli VR50]	VFG046092 (ECVR50_0248) hypothetical protein [ACE T6SS (CVF736)] [Escherichia coli VR50]	VFG046093 (ECVR50_0249) hypothetical protein [ACE T6SS (CVF736)] [Escherichia coli VR50]	VFG046094 (ECVR50_0250) uncharacterized protein ImpC [ACE T6SS (CVF736)] [Escherichia coli VR50]	VFG046096 (ECVR50_0257) hypothetical protein [ACE T6SS (CVF736)] [Escherichia coli VR50]	VFG035711_gi:15829483_ (ECs0229) hypothetical protein [ACE T6SS (CVF736)] [Escherichia coli O157:H7 str. Sakai]	VFG042095_gi:15832966_ (ECs3712) hypothetical protein [ETT2 (SS017)] [Escherichia coli O157:H7 str. Sakai]	VFG046001 (ETEC_0103) protein transport protein HofB [Hemorrhagic E.coli pilus (HCP) (CVF825)] [Escherichia coli O78:H11:K80 str. H10407]	VFG045896 (ETEC_1007) periplasmic pilin chaperone [E.coli laminin-binding fimbriae (ELF) (CVF824)] [Escherichia coli O78:H11:K80 str. H10407]	VFG045912 (ETEC_1008) fimbrial outer membrane usher protein [E.coli laminin-binding fimbriae (ELF) (CVF824)] [Escherichia coli O78:H11:K80 str. H10407]	VFG045932 (ETEC_1011) fimbrial precursor [E.coli laminin-binding fimbriae (ELF) (CVF824)] [Escherichia coli O78:H11:K80 str. H10407]	VFG035728_gi:157155723_ (EcE24377A_0237) hypothetical protein [ACE T6SS (CVF736)] [Escherichia coli E24377A]	VFG045931 (EcE24377A_1056) fimbrial protein [E.coli laminin-binding fimbriae (ELF) (CVF824)] [Escherichia coli E24377A]	VFG035715_gi:291281048_ (G2583_0236) hypothetical protein [ACE T6SS (CVF736)] [Escherichia coli O55:H7 str. CB9615]	VFG045926 (O3M_16610) fimbrial-like adhesin protein [E.coli laminin-binding fimbriae (ELF) (CVF824)] [Escherichia coli O104:H4 str. 2009EL-2050]	VFG045906 (O3M_16615) outer membrane usher protein [E.coli laminin-binding fimbriae (ELF) (CVF824)] [Escherichia coli O104:H4 str. 2009EL-2050]	VFG035722_gi:410484142_ (O3M_20335) type VI secretion system protein ImpG [ACE T6SS (CVF736)] [Escherichia coli O104:H4 str. 2009EL-2050]	VFG045950 (O3M_20925) major pilin subunit [Hemorrhagic E.coli pilus (HCP) (CVF825)] [Escherichia coli O104:H4 str. 2009EL-2050]	VFG045987 (O3M_20930) hypothetical protein [Hemorrhagic E.coli pilus (HCP) (CVF825)] [Escherichia coli O104:H4 str. 2009EL-2050]	VFG045875 (UMNK88_1093) major type 1 subunit fimbrin FimA [E.coli laminin-binding fimbriae (ELF) (CVF824)] [Escherichia coli UMNK88]	VFG045897 (UMNK88_1094) chaperone protein FocC [E.coli laminin-binding fimbriae (ELF) (CVF824)] [Escherichia coli UMNK88]	VFG045913 (UMNK88_1095) outer membrane usher protein FimD [E.coli laminin-binding fimbriae (ELF) (CVF824)] [Escherichia coli UMNK88]	VFG045933 (UMNK88_1096) hypothetical protein [E.coli laminin-binding fimbriae (ELF) (CVF824)] [Escherichia coli UMNK88]	VFG035729_gi:386612389_ (UMNK88_238) hypothetical protein [ACE T6SS (CVF736)] [Escherichia coli UMNK88]	VFG035710_gi:15799909_ (Z0260) hypothetical protein [EHS (SS185)] [Escherichia coli O157:H7 str. EDL933]
ECL19187	VFG046044 (APECO78_03970) type IV pilin biogenesis protein [Hemorrhagic E.coli pilus (HCP) (CVF825)] [Escherichia coli O78:H18 str. WS3294A]	VFG046007 (APECO78_03975) hypothetical protein [Hemorrhagic E.coli pilus (HCP) (CVF825)] [Escherichia coli O78:H18 str. WS3294A]	VFG045899 (APECO78_08685) periplasmic pilin chaperone [E.coli laminin-binding fimbriae (ELF) (CVF824)] [Escherichia coli O78:H18 str. WS3294A]		VFG045935 (APECO78_08695) fimbrial-like adhesin protein [E.coli laminin-binding fimbriae (ELF) (CVF824)] [Escherichia coli O78:H18 str. WS3294A]	VFG045983 (CDCO157_0108) hypothetical protein [Hemorrhagic E.coli pilus (HCP) (CVF825)] [Escherichia coli O157:H7 str. Xuzhou21]	VFG045827 (EC958_1421) hemolysin E [Hemolysin/cytolysin A (CVF750)] [Escherichia coli O25b:H4-ST131]			VFG045862 (ECH74115_1100) fimbrial protein [E.coli laminin-binding fimbriae (ELF) (CVF824)] [Escherichia coli O157:H7 str. EC4115]	VFG045884 (ECH74115_1101) periplasmic pilus chaperone family protein [E.coli laminin-binding fimbriae (ELF) (CVF824)] [Escherichia coli O157:H7 str. EC4115]	VFG035720_gi:260842456_ (ECO103_0224) hypothetical protein [ACE T6SS (CVF736)] [Escherichia coli O103:H2 str. 12009]	VFG035721_gi:260866370_ (ECO111_0230) hypothetical protein [ACE T6SS (CVF736)] [Escherichia coli O111:H- str. 11128]	VFG045859 (ECO55CA74_05720) putative fimbrial-like adhesin protein [E.coli laminin-binding fimbriae (ELF) (CVF824)] [Escherichia coli O55:H7 str. RM12579]	VFG045881 (ECO55CA74_05725) chaperone [E.coli laminin-binding fimbriae (ELF) (CVF824)] [Escherichia coli O55:H7 str. RM12579]	VFG046031 (ECP_0106) type IV pilin biogenesis protein [Hemorrhagic E.coli pilus (HCP) (CVF825)] [Escherichia coli 536]	VFG045993 (ECP_0107) hypothetical protein [Hemorrhagic E.coli pilus (HCP) (CVF825)] [Escherichia coli 536]	VFG045956 (ECP_0108) major pilin subunit [Hemorrhagic E.coli pilus (HCP) (CVF825)] [Escherichia coli 536]	VFG043545_gi:218560235_ (ECS88_3547) lipoprotein NlpI [NlpI (AI331)] [Escherichia coli O45:K1:H7 str. S88]	VFG046082 (ECVR50_0238) hypothetical protein [ACE T6SS (CVF736)] [Escherichia coli VR50]	VFG046083 (ECVR50_0239) IcmF-related protein [ACE T6SS (CVF736)] [Escherichia coli VR50]	VFG046084 (ECVR50_0240) uncharacterized protein ImpA [ACE T6SS (CVF736)] [Escherichia coli VR50]	VFG046086 (ECVR50_0242) putative protease [ACE T6SS (CVF736)] [Escherichia coli VR50]	VFG046090 (ECVR50_0246) hypothetical protein [ACE T6SS (CVF736)] [Escherichia coli VR50]	VFG046091 (ECVR50_0247) hypothetical protein [ACE T6SS (CVF736)] [Escherichia coli VR50]	VFG046092 (ECVR50_0248) hypothetical protein [ACE T6SS (CVF736)] [Escherichia coli VR50]	VFG046093 (ECVR50_0249) hypothetical protein [ACE T6SS (CVF736)] [Escherichia coli VR50]	VFG046094 (ECVR50_0250) uncharacterized protein ImpC [ACE T6SS (CVF736)] [Escherichia coli VR50]	VFG046096 (ECVR50_0257) hypothetical protein [ACE T6SS (CVF736)] [Escherichia coli VR50]	VFG035711_gi:15829483_ (ECs0229) hypothetical protein [ACE T6SS (CVF736)] [Escherichia coli O157:H7 str. Sakai]	VFG042095_gi:15832966_ (ECs3712) hypothetical protein [ETT2 (SS017)] [Escherichia coli O157:H7 str. Sakai]	VFG046001 (ETEC_0103) protein transport protein HofB [Hemorrhagic E.coli pilus (HCP) (CVF825)] [Escherichia coli O78:H11:K80 str. H10407]	VFG045896 (ETEC_1007) periplasmic pilin chaperone [E.coli laminin-binding fimbriae (ELF) (CVF824)] [Escherichia coli O78:H11:K80 str. H10407]		VFG045932 (ETEC_1011) fimbrial precursor [E.coli laminin-binding fimbriae (ELF) (CVF824)] [Escherichia coli O78:H11:K80 str. H10407]	VFG035728_gi:157155723_ (EcE24377A_0237) hypothetical protein [ACE T6SS (CVF736)] [Escherichia coli E24377A]	VFG045931 (EcE24377A_1056) fimbrial protein [E.coli laminin-binding fimbriae (ELF) (CVF824)] [Escherichia coli E24377A]	VFG035715_gi:291281048_ (G2583_0236) hypothetical protein [ACE T6SS (CVF736)] [Escherichia coli O55:H7 str. CB9615]	VFG045926 (O3M_16610) fimbrial-like adhesin protein [E.coli laminin-binding fimbriae (ELF) (CVF824)] [Escherichia coli O104:H4 str. 2009EL-2050]		VFG035722_gi:410484142_ (O3M_20335) type VI secretion system protein ImpG [ACE T6SS (CVF736)] [Escherichia coli O104:H4 str. 2009EL-2050]	VFG045950 (O3M_20925) major pilin subunit [Hemorrhagic E.coli pilus (HCP) (CVF825)] [Escherichia coli O104:H4 str. 2009EL-2050]	VFG045987 (O3M_20930) hypothetical protein [Hemorrhagic E.coli pilus (HCP) (CVF825)] [Escherichia coli O104:H4 str. 2009EL-2050]	VFG045875 (UMNK88_1093) major type 1 subunit fimbrin FimA [E.coli laminin-binding fimbriae (ELF) (CVF824)] [Escherichia coli UMNK88]	VFG045897 (UMNK88_1094) chaperone protein FocC [E.coli laminin-binding fimbriae (ELF) (CVF824)] [Escherichia coli UMNK88]		VFG045933 (UMNK88_1096) hypothetical protein [E.coli laminin-binding fimbriae (ELF) (CVF824)] [Escherichia coli UMNK88]	VFG035729_gi:386612389_ (UMNK88_238) hypothetical protein [ACE T6SS (CVF736)] [Escherichia coli UMNK88]	VFG035710_gi:15799909_ (Z0260) hypothetical protein [EHS (SS185)] [Escherichia coli O157:H7 str. EDL933]
ECL19345	VFG046044 (APECO78_03970) type IV pilin biogenesis protein [Hemorrhagic E.coli pilus (HCP) (CVF825)] [Escherichia coli O78:H18 str. WS3294A]	VFG046007 (APECO78_03975) hypothetical protein [Hemorrhagic E.coli pilus (HCP) (CVF825)] [Escherichia coli O78:H18 str. WS3294A]	VFG045899 (APECO78_08685) periplasmic pilin chaperone [E.coli laminin-binding fimbriae (ELF) (CVF824)] [Escherichia coli O78:H18 str. WS3294A]	VFG045915 (APECO78_08690) outer membrane usher protein [E.coli laminin-binding fimbriae (ELF) (CVF824)] [Escherichia coli O78:H18 str. WS3294A]	VFG045935 (APECO78_08695) fimbrial-like adhesin protein [E.coli laminin-binding fimbriae (ELF) (CVF824)] [Escherichia coli O78:H18 str. WS3294A]	VFG045983 (CDCO157_0108) hypothetical protein [Hemorrhagic E.coli pilus (HCP) (CVF825)] [Escherichia coli O157:H7 str. Xuzhou21]	VFG045827 (EC958_1421) hemolysin E [Hemolysin/cytolysin A (CVF750)] [Escherichia coli O25b:H4-ST131]			VFG045862 (ECH74115_1100) fimbrial protein [E.coli laminin-binding fimbriae (ELF) (CVF824)] [Escherichia coli O157:H7 str. EC4115]	VFG045884 (ECH74115_1101) periplasmic pilus chaperone family protein [E.coli laminin-binding fimbriae (ELF) (CVF824)] [Escherichia coli O157:H7 str. EC4115]	VFG035720_gi:260842456_ (ECO103_0224) hypothetical protein [ACE T6SS (CVF736)] [Escherichia coli O103:H2 str. 12009]	VFG035721_gi:260866370_ (ECO111_0230) hypothetical protein [ACE T6SS (CVF736)] [Escherichia coli O111:H- str. 11128]	VFG045859 (ECO55CA74_05720) putative fimbrial-like adhesin protein [E.coli laminin-binding fimbriae (ELF) (CVF824)] [Escherichia coli O55:H7 str. RM12579]	VFG045881 (ECO55CA74_05725) chaperone [E.coli laminin-binding fimbriae (ELF) (CVF824)] [Escherichia coli O55:H7 str. RM12579]	VFG046031 (ECP_0106) type IV pilin biogenesis protein [Hemorrhagic E.coli pilus (HCP) (CVF825)] [Escherichia coli 536]	VFG045993 (ECP_0107) hypothetical protein [Hemorrhagic E.coli pilus (HCP) (CVF825)] [Escherichia coli 536]	VFG045956 (ECP_0108) major pilin subunit [Hemorrhagic E.coli pilus (HCP) (CVF825)] [Escherichia coli 536]	VFG043545_gi:218560235_ (ECS88_3547) lipoprotein NlpI [NlpI (AI331)] [Escherichia coli O45:K1:H7 str. S88]	VFG046082 (ECVR50_0238) hypothetical protein [ACE T6SS (CVF736)] [Escherichia coli VR50]	VFG046083 (ECVR50_0239) IcmF-related protein [ACE T6SS (CVF736)] [Escherichia coli VR50]	VFG046084 (ECVR50_0240) uncharacterized protein ImpA [ACE T6SS (CVF736)] [Escherichia coli VR50]	VFG046086 (ECVR50_0242) putative protease [ACE T6SS (CVF736)] [Escherichia coli VR50]	VFG046090 (ECVR50_0246) hypothetical protein [ACE T6SS (CVF736)] [Escherichia coli VR50]	VFG046091 (ECVR50_0247) hypothetical protein [ACE T6SS (CVF736)] [Escherichia coli VR50]	VFG046092 (ECVR50_0248) hypothetical protein [ACE T6SS (CVF736)] [Escherichia coli VR50]	VFG046093 (ECVR50_0249) hypothetical protein [ACE T6SS (CVF736)] [Escherichia coli VR50]	VFG046094 (ECVR50_0250) uncharacterized protein ImpC [ACE T6SS (CVF736)] [Escherichia coli VR50]	VFG046096 (ECVR50_0257) hypothetical protein [ACE T6SS (CVF736)] [Escherichia coli VR50]	VFG035711_gi:15829483_ (ECs0229) hypothetical protein [ACE T6SS (CVF736)] [Escherichia coli O157:H7 str. Sakai]	VFG042095_gi:15832966_ (ECs3712) hypothetical protein [ETT2 (SS017)] [Escherichia coli O157:H7 str. Sakai]	VFG046001 (ETEC_0103) protein transport protein HofB [Hemorrhagic E.coli pilus (HCP) (CVF825)] [Escherichia coli O78:H11:K80 str. H10407]	VFG045896 (ETEC_1007) periplasmic pilin chaperone [E.coli laminin-binding fimbriae (ELF) (CVF824)] [Escherichia coli O78:H11:K80 str. H10407]	VFG045912 (ETEC_1008) fimbrial outer membrane usher protein [E.coli laminin-binding fimbriae (ELF) (CVF824)] [Escherichia coli O78:H11:K80 str. H10407]	VFG045932 (ETEC_1011) fimbrial precursor [E.coli laminin-binding fimbriae (ELF) (CVF824)] [Escherichia coli O78:H11:K80 str. H10407]	VFG035728_gi:157155723_ (EcE24377A_0237) hypothetical protein [ACE T6SS (CVF736)] [Escherichia coli E24377A]	VFG045931 (EcE24377A_1056) fimbrial protein [E.coli laminin-binding fimbriae (ELF) (CVF824)] [Escherichia coli E24377A]	VFG035715_gi:291281048_ (G2583_0236) hypothetical protein [ACE T6SS (CVF736)] [Escherichia coli O55:H7 str. CB9615]	VFG045926 (O3M_16610) fimbrial-like adhesin protein [E.coli laminin-binding fimbriae (ELF) (CVF824)] [Escherichia coli O104:H4 str. 2009EL-2050]	VFG045906 (O3M_16615) outer membrane usher protein [E.coli laminin-binding fimbriae (ELF) (CVF824)] [Escherichia coli O104:H4 str. 2009EL-2050]	VFG035722_gi:410484142_ (O3M_20335) type VI secretion system protein ImpG [ACE T6SS (CVF736)] [Escherichia coli O104:H4 str. 2009EL-2050]	VFG045950 (O3M_20925) major pilin subunit [Hemorrhagic E.coli pilus (HCP) (CVF825)] [Escherichia coli O104:H4 str. 2009EL-2050]	VFG045987 (O3M_20930) hypothetical protein [Hemorrhagic E.coli pilus (HCP) (CVF825)] [Escherichia coli O104:H4 str. 2009EL-2050]	VFG045875 (UMNK88_1093) major type 1 subunit fimbrin FimA [E.coli laminin-binding fimbriae (ELF) (CVF824)] [Escherichia coli UMNK88]	VFG045897 (UMNK88_1094) chaperone protein FocC [E.coli laminin-binding fimbriae (ELF) (CVF824)] [Escherichia coli UMNK88]	VFG045913 (UMNK88_1095) outer membrane usher protein FimD [E.coli laminin-binding fimbriae (ELF) (CVF824)] [Escherichia coli UMNK88]	VFG045933 (UMNK88_1096) hypothetical protein [E.coli laminin-binding fimbriae (ELF) (CVF824)] [Escherichia coli UMNK88]	VFG035729_gi:386612389_ (UMNK88_238) hypothetical protein [ACE T6SS (CVF736)] [Escherichia coli UMNK88]	VFG035710_gi:15799909_ (Z0260) hypothetical protein [EHS (SS185)] [Escherichia coli O157:H7 str. EDL933]
ECL19373	VFG046044 (APECO78_03970) type IV pilin biogenesis protein [Hemorrhagic E.coli pilus (HCP) (CVF825)] [Escherichia coli O78:H18 str. WS3294A]	VFG046007 (APECO78_03975) hypothetical protein [Hemorrhagic E.coli pilus (HCP) (CVF825)] [Escherichia coli O78:H18 str. WS3294A]	VFG045899 (APECO78_08685) periplasmic pilin chaperone [E.coli laminin-binding fimbriae (ELF) (CVF824)] [Escherichia coli O78:H18 str. WS3294A]	VFG045915 (APECO78_08690) outer membrane usher protein [E.coli laminin-binding fimbriae (ELF) (CVF824)] [Escherichia coli O78:H18 str. WS3294A]	VFG045935 (APECO78_08695) fimbrial-like adhesin protein [E.coli laminin-binding fimbriae (ELF) (CVF824)] [Escherichia coli O78:H18 str. WS3294A]	VFG045983 (CDCO157_0108) hypothetical protein [Hemorrhagic E.coli pilus (HCP) (CVF825)] [Escherichia coli O157:H7 str. Xuzhou21]	VFG045827 (EC958_1421) hemolysin E [Hemolysin/cytolysin A (CVF750)] [Escherichia coli O25b:H4-ST131]		VFG045826 (EC958_5138) Fluffing protein [Cah, AIDA-I type (CVF745)] [Escherichia coli O25b:H4-ST131]	VFG045862 (ECH74115_1100) fimbrial protein [E.coli laminin-binding fimbriae (ELF) (CVF824)] [Escherichia coli O157:H7 str. EC4115]	VFG045884 (ECH74115_1101) periplasmic pilus chaperone family protein [E.coli laminin-binding fimbriae (ELF) (CVF824)] [Escherichia coli O157:H7 str. EC4115]	VFG035720_gi:260842456_ (ECO103_0224) hypothetical protein [ACE T6SS (CVF736)] [Escherichia coli O103:H2 str. 12009]	VFG035721_gi:260866370_ (ECO111_0230) hypothetical protein [ACE T6SS (CVF736)] [Escherichia coli O111:H- str. 11128]	VFG045859 (ECO55CA74_05720) putative fimbrial-like adhesin protein [E.coli laminin-binding fimbriae (ELF) (CVF824)] [Escherichia coli O55:H7 str. RM12579]	VFG045881 (ECO55CA74_05725) chaperone [E.coli laminin-binding fimbriae (ELF) (CVF824)] [Escherichia coli O55:H7 str. RM12579]	VFG046031 (ECP_0106) type IV pilin biogenesis protein [Hemorrhagic E.coli pilus (HCP) (CVF825)] [Escherichia coli 536]	VFG045993 (ECP_0107) hypothetical protein [Hemorrhagic E.coli pilus (HCP) (CVF825)] [Escherichia coli 536]	VFG045956 (ECP_0108) major pilin subunit [Hemorrhagic E.coli pilus (HCP) (CVF825)] [Escherichia coli 536]	VFG043545_gi:218560235_ (ECS88_3547) lipoprotein NlpI [NlpI (AI331)] [Escherichia coli O45:K1:H7 str. S88]	VFG046082 (ECVR50_0238) hypothetical protein [ACE T6SS (CVF736)] [Escherichia coli VR50]	VFG046083 (ECVR50_0239) IcmF-related protein [ACE T6SS (CVF736)] [Escherichia coli VR50]	VFG046084 (ECVR50_0240) uncharacterized protein ImpA [ACE T6SS (CVF736)] [Escherichia coli VR50]	VFG046086 (ECVR50_0242) putative protease [ACE T6SS (CVF736)] [Escherichia coli VR50]	VFG046090 (ECVR50_0246) hypothetical protein [ACE T6SS (CVF736)] [Escherichia coli VR50]	VFG046091 (ECVR50_0247) hypothetical protein [ACE T6SS (CVF736)] [Escherichia coli VR50]	VFG046092 (ECVR50_0248) hypothetical protein [ACE T6SS (CVF736)] [Escherichia coli VR50]	VFG046093 (ECVR50_0249) hypothetical protein [ACE T6SS (CVF736)] [Escherichia coli VR50]	VFG046094 (ECVR50_0250) uncharacterized protein ImpC [ACE T6SS (CVF736)] [Escherichia coli VR50]	VFG046096 (ECVR50_0257) hypothetical protein [ACE T6SS (CVF736)] [Escherichia coli VR50]	VFG035711_gi:15829483_ (ECs0229) hypothetical protein [ACE T6SS (CVF736)] [Escherichia coli O157:H7 str. Sakai]	VFG042095_gi:15832966_ (ECs3712) hypothetical protein [ETT2 (SS017)] [Escherichia coli O157:H7 str. Sakai]	VFG046001 (ETEC_0103) protein transport protein HofB [Hemorrhagic E.coli pilus (HCP) (CVF825)] [Escherichia coli O78:H11:K80 str. H10407]	VFG045896 (ETEC_1007) periplasmic pilin chaperone [E.coli laminin-binding fimbriae (ELF) (CVF824)] [Escherichia coli O78:H11:K80 str. H10407]	VFG045912 (ETEC_1008) fimbrial outer membrane usher protein [E.coli laminin-binding fimbriae (ELF) (CVF824)] [Escherichia coli O78:H11:K80 str. H10407]	VFG045932 (ETEC_1011) fimbrial precursor [E.coli laminin-binding fimbriae (ELF) (CVF824)] [Escherichia coli O78:H11:K80 str. H10407]	VFG035728_gi:157155723_ (EcE24377A_0237) hypothetical protein [ACE T6SS (CVF736)] [Escherichia coli E24377A]	VFG045931 (EcE24377A_1056) fimbrial protein [E.coli laminin-binding fimbriae (ELF) (CVF824)] [Escherichia coli E24377A]	VFG035715_gi:291281048_ (G2583_0236) hypothetical protein [ACE T6SS (CVF736)] [Escherichia coli O55:H7 str. CB9615]	VFG045926 (O3M_16610) fimbrial-like adhesin protein [E.coli laminin-binding fimbriae (ELF) (CVF824)] [Escherichia coli O104:H4 str. 2009EL-2050]	VFG045906 (O3M_16615) outer membrane usher protein [E.coli laminin-binding fimbriae (ELF) (CVF824)] [Escherichia coli O104:H4 str. 2009EL-2050]	VFG035722_gi:410484142_ (O3M_20335) type VI secretion system protein ImpG [ACE T6SS (CVF736)] [Escherichia coli O104:H4 str. 2009EL-2050]	VFG045950 (O3M_20925) major pilin subunit [Hemorrhagic E.coli pilus (HCP) (CVF825)] [Escherichia coli O104:H4 str. 2009EL-2050]	VFG045987 (O3M_20930) hypothetical protein [Hemorrhagic E.coli pilus (HCP) (CVF825)] [Escherichia coli O104:H4 str. 2009EL-2050]	VFG045875 (UMNK88_1093) major type 1 subunit fimbrin FimA [E.coli laminin-binding fimbriae (ELF) (CVF824)] [Escherichia coli UMNK88]	VFG045897 (UMNK88_1094) chaperone protein FocC [E.coli laminin-binding fimbriae (ELF) (CVF824)] [Escherichia coli UMNK88]	VFG045913 (UMNK88_1095) outer membrane usher protein FimD [E.coli laminin-binding fimbriae (ELF) (CVF824)] [Escherichia coli UMNK88]	VFG045933 (UMNK88_1096) hypothetical protein [E.coli laminin-binding fimbriae (ELF) (CVF824)] [Escherichia coli UMNK88]	VFG035729_gi:386612389_ (UMNK88_238) hypothetical protein [ACE T6SS (CVF736)] [Escherichia coli UMNK88]	VFG035710_gi:15799909_ (Z0260) hypothetical protein [EHS (SS185)] [Escherichia coli O157:H7 str. EDL933]
ECL19390	VFG046044 (APECO78_03970) type IV pilin biogenesis protein [Hemorrhagic E.coli pilus (HCP) (CVF825)] [Escherichia coli O78:H18 str. WS3294A]	VFG046007 (APECO78_03975) hypothetical protein [Hemorrhagic E.coli pilus (HCP) (CVF825)] [Escherichia coli O78:H18 str. WS3294A]	VFG045899 (APECO78_08685) periplasmic pilin chaperone [E.coli laminin-binding fimbriae (ELF) (CVF824)] [Escherichia coli O78:H18 str. WS3294A]	VFG045915 (APECO78_08690) outer membrane usher protein [E.coli laminin-binding fimbriae (ELF) (CVF824)] [Escherichia coli O78:H18 str. WS3294A]	VFG045935 (APECO78_08695) fimbrial-like adhesin protein [E.coli laminin-binding fimbriae (ELF) (CVF824)] [Escherichia coli O78:H18 str. WS3294A]	VFG045983 (CDCO157_0108) hypothetical protein [Hemorrhagic E.coli pilus (HCP) (CVF825)] [Escherichia coli O157:H7 str. Xuzhou21]	VFG045827 (EC958_1421) hemolysin E [Hemolysin/cytolysin A (CVF750)] [Escherichia coli O25b:H4-ST131]		VFG045826 (EC958_5138) Fluffing protein [Cah, AIDA-I type (CVF745)] [Escherichia coli O25b:H4-ST131]	VFG045862 (ECH74115_1100) fimbrial protein [E.coli laminin-binding fimbriae (ELF) (CVF824)] [Escherichia coli O157:H7 str. EC4115]	VFG045884 (ECH74115_1101) periplasmic pilus chaperone family protein [E.coli laminin-binding fimbriae (ELF) (CVF824)] [Escherichia coli O157:H7 str. EC4115]	VFG035720_gi:260842456_ (ECO103_0224) hypothetical protein [ACE T6SS (CVF736)] [Escherichia coli O103:H2 str. 12009]	VFG035721_gi:260866370_ (ECO111_0230) hypothetical protein [ACE T6SS (CVF736)] [Escherichia coli O111:H- str. 11128]	VFG045859 (ECO55CA74_05720) putative fimbrial-like adhesin protein [E.coli laminin-binding fimbriae (ELF) (CVF824)] [Escherichia coli O55:H7 str. RM12579]	VFG045881 (ECO55CA74_05725) chaperone [E.coli laminin-binding fimbriae (ELF) (CVF824)] [Escherichia coli O55:H7 str. RM12579]	VFG046031 (ECP_0106) type IV pilin biogenesis protein [Hemorrhagic E.coli pilus (HCP) (CVF825)] [Escherichia coli 536]	VFG045993 (ECP_0107) hypothetical protein [Hemorrhagic E.coli pilus (HCP) (CVF825)] [Escherichia coli 536]	VFG045956 (ECP_0108) major pilin subunit [Hemorrhagic E.coli pilus (HCP) (CVF825)] [Escherichia coli 536]	VFG043545_gi:218560235_ (ECS88_3547) lipoprotein NlpI [NlpI (AI331)] [Escherichia coli O45:K1:H7 str. S88]	VFG046082 (ECVR50_0238) hypothetical protein [ACE T6SS (CVF736)] [Escherichia coli VR50]	VFG046083 (ECVR50_0239) IcmF-related protein [ACE T6SS (CVF736)] [Escherichia coli VR50]	VFG046084 (ECVR50_0240) uncharacterized protein ImpA [ACE T6SS (CVF736)] [Escherichia coli VR50]	VFG046086 (ECVR50_0242) putative protease [ACE T6SS (CVF736)] [Escherichia coli VR50]	VFG046090 (ECVR50_0246) hypothetical protein [ACE T6SS (CVF736)] [Escherichia coli VR50]	VFG046091 (ECVR50_0247) hypothetical protein [ACE T6SS (CVF736)] [Escherichia coli VR50]	VFG046092 (ECVR50_0248) hypothetical protein [ACE T6SS (CVF736)] [Escherichia coli VR50]	VFG046093 (ECVR50_0249) hypothetical protein [ACE T6SS (CVF736)] [Escherichia coli VR50]	VFG046094 (ECVR50_0250) uncharacterized protein ImpC [ACE T6SS (CVF736)] [Escherichia coli VR50]	VFG046096 (ECVR50_0257) hypothetical protein [ACE T6SS (CVF736)] [Escherichia coli VR50]	VFG035711_gi:15829483_ (ECs0229) hypothetical protein [ACE T6SS (CVF736)] [Escherichia coli O157:H7 str. Sakai]	VFG042095_gi:15832966_ (ECs3712) hypothetical protein [ETT2 (SS017)] [Escherichia coli O157:H7 str. Sakai]	VFG046001 (ETEC_0103) protein transport protein HofB [Hemorrhagic E.coli pilus (HCP) (CVF825)] [Escherichia coli O78:H11:K80 str. H10407]	VFG045896 (ETEC_1007) periplasmic pilin chaperone [E.coli laminin-binding fimbriae (ELF) (CVF824)] [Escherichia coli O78:H11:K80 str. H10407]	VFG045912 (ETEC_1008) fimbrial outer membrane usher protein [E.coli laminin-binding fimbriae (ELF) (CVF824)] [Escherichia coli O78:H11:K80 str. H10407]	VFG045932 (ETEC_1011) fimbrial precursor [E.coli laminin-binding fimbriae (ELF) (CVF824)] [Escherichia coli O78:H11:K80 str. H10407]	VFG035728_gi:157155723_ (EcE24377A_0237) hypothetical protein [ACE T6SS (CVF736)] [Escherichia coli E24377A]	VFG045931 (EcE24377A_1056) fimbrial protein [E.coli laminin-binding fimbriae (ELF) (CVF824)] [Escherichia coli E24377A]	VFG035715_gi:291281048_ (G2583_0236) hypothetical protein [ACE T6SS (CVF736)] [Escherichia coli O55:H7 str. CB9615]	VFG045926 (O3M_16610) fimbrial-like adhesin protein [E.coli laminin-binding fimbriae (ELF) (CVF824)] [Escherichia coli O104:H4 str. 2009EL-2050]	VFG045906 (O3M_16615) outer membrane usher protein [E.coli laminin-binding fimbriae (ELF) (CVF824)] [Escherichia coli O104:H4 str. 2009EL-2050]	VFG035722_gi:410484142_ (O3M_20335) type VI secretion system protein ImpG [ACE T6SS (CVF736)] [Escherichia coli O104:H4 str. 2009EL-2050]	VFG045950 (O3M_20925) major pilin subunit [Hemorrhagic E.coli pilus (HCP) (CVF825)] [Escherichia coli O104:H4 str. 2009EL-2050]	VFG045987 (O3M_20930) hypothetical protein [Hemorrhagic E.coli pilus (HCP) (CVF825)] [Escherichia coli O104:H4 str. 2009EL-2050]	VFG045875 (UMNK88_1093) major type 1 subunit fimbrin FimA [E.coli laminin-binding fimbriae (ELF) (CVF824)] [Escherichia coli UMNK88]	VFG045897 (UMNK88_1094) chaperone protein FocC [E.coli laminin-binding fimbriae (ELF) (CVF824)] [Escherichia coli UMNK88]	VFG045913 (UMNK88_1095) outer membrane usher protein FimD [E.coli laminin-binding fimbriae (ELF) (CVF824)] [Escherichia coli UMNK88]	VFG045933 (UMNK88_1096) hypothetical protein [E.coli laminin-binding fimbriae (ELF) (CVF824)] [Escherichia coli UMNK88]	VFG035729_gi:386612389_ (UMNK88_238) hypothetical protein [ACE T6SS (CVF736)] [Escherichia coli UMNK88]	VFG035710_gi:15799909_ (Z0260) hypothetical protein [EHS (SS185)] [Escherichia coli O157:H7 str. EDL933]
ECL19403	VFG046044 (APECO78_03970) type IV pilin biogenesis protein [Hemorrhagic E.coli pilus (HCP) (CVF825)] [Escherichia coli O78:H18 str. WS3294A]	VFG046007 (APECO78_03975) hypothetical protein [Hemorrhagic E.coli pilus (HCP) (CVF825)] [Escherichia coli O78:H18 str. WS3294A]	VFG045899 (APECO78_08685) periplasmic pilin chaperone [E.coli laminin-binding fimbriae (ELF) (CVF824)] [Escherichia coli O78:H18 str. WS3294A]	VFG045915 (APECO78_08690) outer membrane usher protein [E.coli laminin-binding fimbriae (ELF) (CVF824)] [Escherichia coli O78:H18 str. WS3294A]	VFG045935 (APECO78_08695) fimbrial-like adhesin protein [E.coli laminin-binding fimbriae (ELF) (CVF824)] [Escherichia coli O78:H18 str. WS3294A]	VFG045983 (CDCO157_0108) hypothetical protein [Hemorrhagic E.coli pilus (HCP) (CVF825)] [Escherichia coli O157:H7 str. Xuzhou21]	VFG045827 (EC958_1421) hemolysin E [Hemolysin/cytolysin A (CVF750)] [Escherichia coli O25b:H4-ST131]		VFG045826 (EC958_5138) Fluffing protein [Cah, AIDA-I type (CVF745)] [Escherichia coli O25b:H4-ST131]	VFG045862 (ECH74115_1100) fimbrial protein [E.coli laminin-binding fimbriae (ELF) (CVF824)] [Escherichia coli O157:H7 str. EC4115]	VFG045884 (ECH74115_1101) periplasmic pilus chaperone family protein [E.coli laminin-binding fimbriae (ELF) (CVF824)] [Escherichia coli O157:H7 str. EC4115]	VFG035720_gi:260842456_ (ECO103_0224) hypothetical protein [ACE T6SS (CVF736)] [Escherichia coli O103:H2 str. 12009]	VFG035721_gi:260866370_ (ECO111_0230) hypothetical protein [ACE T6SS (CVF736)] [Escherichia coli O111:H- str. 11128]	VFG045859 (ECO55CA74_05720) putative fimbrial-like adhesin protein [E.coli laminin-binding fimbriae (ELF) (CVF824)] [Escherichia coli O55:H7 str. RM12579]	VFG045881 (ECO55CA74_05725) chaperone [E.coli laminin-binding fimbriae (ELF) (CVF824)] [Escherichia coli O55:H7 str. RM12579]	VFG046031 (ECP_0106) type IV pilin biogenesis protein [Hemorrhagic E.coli pilus (HCP) (CVF825)] [Escherichia coli 536]	VFG045993 (ECP_0107) hypothetical protein [Hemorrhagic E.coli pilus (HCP) (CVF825)] [Escherichia coli 536]	VFG045956 (ECP_0108) major pilin subunit [Hemorrhagic E.coli pilus (HCP) (CVF825)] [Escherichia coli 536]	VFG043545_gi:218560235_ (ECS88_3547) lipoprotein NlpI [NlpI (AI331)] [Escherichia coli O45:K1:H7 str. S88]	VFG046082 (ECVR50_0238) hypothetical protein [ACE T6SS (CVF736)] [Escherichia coli VR50]	VFG046083 (ECVR50_0239) IcmF-related protein [ACE T6SS (CVF736)] [Escherichia coli VR50]	VFG046084 (ECVR50_0240) uncharacterized protein ImpA [ACE T6SS (CVF736)] [Escherichia coli VR50]	VFG046086 (ECVR50_0242) putative protease [ACE T6SS (CVF736)] [Escherichia coli VR50]	VFG046090 (ECVR50_0246) hypothetical protein [ACE T6SS (CVF736)] [Escherichia coli VR50]	VFG046091 (ECVR50_0247) hypothetical protein [ACE T6SS (CVF736)] [Escherichia coli VR50]	VFG046092 (ECVR50_0248) hypothetical protein [ACE T6SS (CVF736)] [Escherichia coli VR50]	VFG046093 (ECVR50_0249) hypothetical protein [ACE T6SS (CVF736)] [Escherichia coli VR50]	VFG046094 (ECVR50_0250) uncharacterized protein ImpC [ACE T6SS (CVF736)] [Escherichia coli VR50]	VFG046096 (ECVR50_0257) hypothetical protein [ACE T6SS (CVF736)] [Escherichia coli VR50]	VFG035711_gi:15829483_ (ECs0229) hypothetical protein [ACE T6SS (CVF736)] [Escherichia coli O157:H7 str. Sakai]	VFG042095_gi:15832966_ (ECs3712) hypothetical protein [ETT2 (SS017)] [Escherichia coli O157:H7 str. Sakai]	VFG046001 (ETEC_0103) protein transport protein HofB [Hemorrhagic E.coli pilus (HCP) (CVF825)] [Escherichia coli O78:H11:K80 str. H10407]	VFG045896 (ETEC_1007) periplasmic pilin chaperone [E.coli laminin-binding fimbriae (ELF) (CVF824)] [Escherichia coli O78:H11:K80 str. H10407]	VFG045912 (ETEC_1008) fimbrial outer membrane usher protein [E.coli laminin-binding fimbriae (ELF) (CVF824)] [Escherichia coli O78:H11:K80 str. H10407]	VFG045932 (ETEC_1011) fimbrial precursor [E.coli laminin-binding fimbriae (ELF) (CVF824)] [Escherichia coli O78:H11:K80 str. H10407]	VFG035728_gi:157155723_ (EcE24377A_0237) hypothetical protein [ACE T6SS (CVF736)] [Escherichia coli E24377A]	VFG045931 (EcE24377A_1056) fimbrial protein [E.coli laminin-binding fimbriae (ELF) (CVF824)] [Escherichia coli E24377A]	VFG035715_gi:291281048_ (G2583_0236) hypothetical protein [ACE T6SS (CVF736)] [Escherichia coli O55:H7 str. CB9615]	VFG045926 (O3M_16610) fimbrial-like adhesin protein [E.coli laminin-binding fimbriae (ELF) (CVF824)] [Escherichia coli O104:H4 str. 2009EL-2050]	VFG045906 (O3M_16615) outer membrane usher protein [E.coli laminin-binding fimbriae (ELF) (CVF824)] [Escherichia coli O104:H4 str. 2009EL-2050]	VFG035722_gi:410484142_ (O3M_20335) type VI secretion system protein ImpG [ACE T6SS (CVF736)] [Escherichia coli O104:H4 str. 2009EL-2050]	VFG045950 (O3M_20925) major pilin subunit [Hemorrhagic E.coli pilus (HCP) (CVF825)] [Escherichia coli O104:H4 str. 2009EL-2050]	VFG045987 (O3M_20930) hypothetical protein [Hemorrhagic E.coli pilus (HCP) (CVF825)] [Escherichia coli O104:H4 str. 2009EL-2050]	VFG045875 (UMNK88_1093) major type 1 subunit fimbrin FimA [E.coli laminin-binding fimbriae (ELF) (CVF824)] [Escherichia coli UMNK88]	VFG045897 (UMNK88_1094) chaperone protein FocC [E.coli laminin-binding fimbriae (ELF) (CVF824)] [Escherichia coli UMNK88]	VFG045913 (UMNK88_1095) outer membrane usher protein FimD [E.coli laminin-binding fimbriae (ELF) (CVF824)] [Escherichia coli UMNK88]	VFG045933 (UMNK88_1096) hypothetical protein [E.coli laminin-binding fimbriae (ELF) (CVF824)] [Escherichia coli UMNK88]	VFG035729_gi:386612389_ (UMNK88_238) hypothetical protein [ACE T6SS (CVF736)] [Escherichia coli UMNK88]	VFG035710_gi:15799909_ (Z0260) hypothetical protein [EHS (SS185)] [Escherichia coli O157:H7 str. EDL933]
ECL19414	VFG046044 (APECO78_03970) type IV pilin biogenesis protein [Hemorrhagic E.coli pilus (HCP) (CVF825)] [Escherichia coli O78:H18 str. WS3294A]	VFG046007 (APECO78_03975) hypothetical protein [Hemorrhagic E.coli pilus (HCP) (CVF825)] [Escherichia coli O78:H18 str. WS3294A]	VFG045899 (APECO78_08685) periplasmic pilin chaperone [E.coli laminin-binding fimbriae (ELF) (CVF824)] [Escherichia coli O78:H18 str. WS3294A]	VFG045915 (APECO78_08690) outer membrane usher protein [E.coli laminin-binding fimbriae (ELF) (CVF824)] [Escherichia coli O78:H18 str. WS3294A]	VFG045935 (APECO78_08695) fimbrial-like adhesin protein [E.coli laminin-binding fimbriae (ELF) (CVF824)] [Escherichia coli O78:H18 str. WS3294A]	VFG045983 (CDCO157_0108) hypothetical protein [Hemorrhagic E.coli pilus (HCP) (CVF825)] [Escherichia coli O157:H7 str. Xuzhou21]	VFG045827 (EC958_1421) hemolysin E [Hemolysin/cytolysin A (CVF750)] [Escherichia coli O25b:H4-ST131]		VFG045826 (EC958_5138) Fluffing protein [Cah, AIDA-I type (CVF745)] [Escherichia coli O25b:H4-ST131]	VFG045862 (ECH74115_1100) fimbrial protein [E.coli laminin-binding fimbriae (ELF) (CVF824)] [Escherichia coli O157:H7 str. EC4115]	VFG045884 (ECH74115_1101) periplasmic pilus chaperone family protein [E.coli laminin-binding fimbriae (ELF) (CVF824)] [Escherichia coli O157:H7 str. EC4115]	VFG035720_gi:260842456_ (ECO103_0224) hypothetical protein [ACE T6SS (CVF736)] [Escherichia coli O103:H2 str. 12009]	VFG035721_gi:260866370_ (ECO111_0230) hypothetical protein [ACE T6SS (CVF736)] [Escherichia coli O111:H- str. 11128]	VFG045859 (ECO55CA74_05720) putative fimbrial-like adhesin protein [E.coli laminin-binding fimbriae (ELF) (CVF824)] [Escherichia coli O55:H7 str. RM12579]	VFG045881 (ECO55CA74_05725) chaperone [E.coli laminin-binding fimbriae (ELF) (CVF824)] [Escherichia coli O55:H7 str. RM12579]	VFG046031 (ECP_0106) type IV pilin biogenesis protein [Hemorrhagic E.coli pilus (HCP) (CVF825)] [Escherichia coli 536]	VFG045993 (ECP_0107) hypothetical protein [Hemorrhagic E.coli pilus (HCP) (CVF825)] [Escherichia coli 536]	VFG045956 (ECP_0108) major pilin subunit [Hemorrhagic E.coli pilus (HCP) (CVF825)] [Escherichia coli 536]	VFG043545_gi:218560235_ (ECS88_3547) lipoprotein NlpI [NlpI (AI331)] [Escherichia coli O45:K1:H7 str. S88]	VFG046082 (ECVR50_0238) hypothetical protein [ACE T6SS (CVF736)] [Escherichia coli VR50]	VFG046083 (ECVR50_0239) IcmF-related protein [ACE T6SS (CVF736)] [Escherichia coli VR50]	VFG046084 (ECVR50_0240) uncharacterized protein ImpA [ACE T6SS (CVF736)] [Escherichia coli VR50]	VFG046086 (ECVR50_0242) putative protease [ACE T6SS (CVF736)] [Escherichia coli VR50]	VFG046090 (ECVR50_0246) hypothetical protein [ACE T6SS (CVF736)] [Escherichia coli VR50]	VFG046091 (ECVR50_0247) hypothetical protein [ACE T6SS (CVF736)] [Escherichia coli VR50]	VFG046092 (ECVR50_0248) hypothetical protein [ACE T6SS (CVF736)] [Escherichia coli VR50]	VFG046093 (ECVR50_0249) hypothetical protein [ACE T6SS (CVF736)] [Escherichia coli VR50]	VFG046094 (ECVR50_0250) uncharacterized protein ImpC [ACE T6SS (CVF736)] [Escherichia coli VR50]	VFG046096 (ECVR50_0257) hypothetical protein [ACE T6SS (CVF736)] [Escherichia coli VR50]	VFG035711_gi:15829483_ (ECs0229) hypothetical protein [ACE T6SS (CVF736)] [Escherichia coli O157:H7 str. Sakai]	VFG042095_gi:15832966_ (ECs3712) hypothetical protein [ETT2 (SS017)] [Escherichia coli O157:H7 str. Sakai]	VFG046001 (ETEC_0103) protein transport protein HofB [Hemorrhagic E.coli pilus (HCP) (CVF825)] [Escherichia coli O78:H11:K80 str. H10407]	VFG045896 (ETEC_1007) periplasmic pilin chaperone [E.coli laminin-binding fimbriae (ELF) (CVF824)] [Escherichia coli O78:H11:K80 str. H10407]	VFG045912 (ETEC_1008) fimbrial outer membrane usher protein [E.coli laminin-binding fimbriae (ELF) (CVF824)] [Escherichia coli O78:H11:K80 str. H10407]	VFG045932 (ETEC_1011) fimbrial precursor [E.coli laminin-binding fimbriae (ELF) (CVF824)] [Escherichia coli O78:H11:K80 str. H10407]	VFG035728_gi:157155723_ (EcE24377A_0237) hypothetical protein [ACE T6SS (CVF736)] [Escherichia coli E24377A]	VFG045931 (EcE24377A_1056) fimbrial protein [E.coli laminin-binding fimbriae (ELF) (CVF824)] [Escherichia coli E24377A]	VFG035715_gi:291281048_ (G2583_0236) hypothetical protein [ACE T6SS (CVF736)] [Escherichia coli O55:H7 str. CB9615]	VFG045926 (O3M_16610) fimbrial-like adhesin protein [E.coli laminin-binding fimbriae (ELF) (CVF824)] [Escherichia coli O104:H4 str. 2009EL-2050]	VFG045906 (O3M_16615) outer membrane usher protein [E.coli laminin-binding fimbriae (ELF) (CVF824)] [Escherichia coli O104:H4 str. 2009EL-2050]	VFG035722_gi:410484142_ (O3M_20335) type VI secretion system protein ImpG [ACE T6SS (CVF736)] [Escherichia coli O104:H4 str. 2009EL-2050]	VFG045950 (O3M_20925) major pilin subunit [Hemorrhagic E.coli pilus (HCP) (CVF825)] [Escherichia coli O104:H4 str. 2009EL-2050]	VFG045987 (O3M_20930) hypothetical protein [Hemorrhagic E.coli pilus (HCP) (CVF825)] [Escherichia coli O104:H4 str. 2009EL-2050]	VFG045875 (UMNK88_1093) major type 1 subunit fimbrin FimA [E.coli laminin-binding fimbriae (ELF) (CVF824)] [Escherichia coli UMNK88]	VFG045897 (UMNK88_1094) chaperone protein FocC [E.coli laminin-binding fimbriae (ELF) (CVF824)] [Escherichia coli UMNK88]	VFG045913 (UMNK88_1095) outer membrane usher protein FimD [E.coli laminin-binding fimbriae (ELF) (CVF824)] [Escherichia coli UMNK88]	VFG045933 (UMNK88_1096) hypothetical protein [E.coli laminin-binding fimbriae (ELF) (CVF824)] [Escherichia coli UMNK88]	VFG035729_gi:386612389_ (UMNK88_238) hypothetical protein [ACE T6SS (CVF736)] [Escherichia coli UMNK88]	VFG035710_gi:15799909_ (Z0260) hypothetical protein [EHS (SS185)] [Escherichia coli O157:H7 str. EDL933]
ECL19427	VFG046044 (APECO78_03970) type IV pilin biogenesis protein [Hemorrhagic E.coli pilus (HCP) (CVF825)] [Escherichia coli O78:H18 str. WS3294A]	VFG046007 (APECO78_03975) hypothetical protein [Hemorrhagic E.coli pilus (HCP) (CVF825)] [Escherichia coli O78:H18 str. WS3294A]	VFG045899 (APECO78_08685) periplasmic pilin chaperone [E.coli laminin-binding fimbriae (ELF) (CVF824)] [Escherichia coli O78:H18 str. WS3294A]	VFG045915 (APECO78_08690) outer membrane usher protein [E.coli laminin-binding fimbriae (ELF) (CVF824)] [Escherichia coli O78:H18 str. WS3294A]	VFG045935 (APECO78_08695) fimbrial-like adhesin protein [E.coli laminin-binding fimbriae (ELF) (CVF824)] [Escherichia coli O78:H18 str. WS3294A]	VFG045983 (CDCO157_0108) hypothetical protein [Hemorrhagic E.coli pilus (HCP) (CVF825)] [Escherichia coli O157:H7 str. Xuzhou21]	VFG045827 (EC958_1421) hemolysin E [Hemolysin/cytolysin A (CVF750)] [Escherichia coli O25b:H4-ST131]			VFG045862 (ECH74115_1100) fimbrial protein [E.coli laminin-binding fimbriae (ELF) (CVF824)] [Escherichia coli O157:H7 str. EC4115]	VFG045884 (ECH74115_1101) periplasmic pilus chaperone family protein [E.coli laminin-binding fimbriae (ELF) (CVF824)] [Escherichia coli O157:H7 str. EC4115]	VFG035720_gi:260842456_ (ECO103_0224) hypothetical protein [ACE T6SS (CVF736)] [Escherichia coli O103:H2 str. 12009]	VFG035721_gi:260866370_ (ECO111_0230) hypothetical protein [ACE T6SS (CVF736)] [Escherichia coli O111:H- str. 11128]	VFG045859 (ECO55CA74_05720) putative fimbrial-like adhesin protein [E.coli laminin-binding fimbriae (ELF) (CVF824)] [Escherichia coli O55:H7 str. RM12579]	VFG045881 (ECO55CA74_05725) chaperone [E.coli laminin-binding fimbriae (ELF) (CVF824)] [Escherichia coli O55:H7 str. RM12579]	VFG046031 (ECP_0106) type IV pilin biogenesis protein [Hemorrhagic E.coli pilus (HCP) (CVF825)] [Escherichia coli 536]	VFG045993 (ECP_0107) hypothetical protein [Hemorrhagic E.coli pilus (HCP) (CVF825)] [Escherichia coli 536]	VFG045956 (ECP_0108) major pilin subunit [Hemorrhagic E.coli pilus (HCP) (CVF825)] [Escherichia coli 536]	VFG043545_gi:218560235_ (ECS88_3547) lipoprotein NlpI [NlpI (AI331)] [Escherichia coli O45:K1:H7 str. S88]	VFG046082 (ECVR50_0238) hypothetical protein [ACE T6SS (CVF736)] [Escherichia coli VR50]	VFG046083 (ECVR50_0239) IcmF-related protein [ACE T6SS (CVF736)] [Escherichia coli VR50]	VFG046084 (ECVR50_0240) uncharacterized protein ImpA [ACE T6SS (CVF736)] [Escherichia coli VR50]	VFG046086 (ECVR50_0242) putative protease [ACE T6SS (CVF736)] [Escherichia coli VR50]	VFG046090 (ECVR50_0246) hypothetical protein [ACE T6SS (CVF736)] [Escherichia coli VR50]	VFG046091 (ECVR50_0247) hypothetical protein [ACE T6SS (CVF736)] [Escherichia coli VR50]	VFG046092 (ECVR50_0248) hypothetical protein [ACE T6SS (CVF736)] [Escherichia coli VR50]	VFG046093 (ECVR50_0249) hypothetical protein [ACE T6SS (CVF736)] [Escherichia coli VR50]	VFG046094 (ECVR50_0250) uncharacterized protein ImpC [ACE T6SS (CVF736)] [Escherichia coli VR50]	VFG046096 (ECVR50_0257) hypothetical protein [ACE T6SS (CVF736)] [Escherichia coli VR50]	VFG035711_gi:15829483_ (ECs0229) hypothetical protein [ACE T6SS (CVF736)] [Escherichia coli O157:H7 str. Sakai]	VFG042095_gi:15832966_ (ECs3712) hypothetical protein [ETT2 (SS017)] [Escherichia coli O157:H7 str. Sakai]	VFG046001 (ETEC_0103) protein transport protein HofB [Hemorrhagic E.coli pilus (HCP) (CVF825)] [Escherichia coli O78:H11:K80 str. H10407]	VFG045896 (ETEC_1007) periplasmic pilin chaperone [E.coli laminin-binding fimbriae (ELF) (CVF824)] [Escherichia coli O78:H11:K80 str. H10407]	VFG045912 (ETEC_1008) fimbrial outer membrane usher protein [E.coli laminin-binding fimbriae (ELF) (CVF824)] [Escherichia coli O78:H11:K80 str. H10407]	VFG045932 (ETEC_1011) fimbrial precursor [E.coli laminin-binding fimbriae (ELF) (CVF824)] [Escherichia coli O78:H11:K80 str. H10407]	VFG035728_gi:157155723_ (EcE24377A_0237) hypothetical protein [ACE T6SS (CVF736)] [Escherichia coli E24377A]	VFG045931 (EcE24377A_1056) fimbrial protein [E.coli laminin-binding fimbriae (ELF) (CVF824)] [Escherichia coli E24377A]	VFG035715_gi:291281048_ (G2583_0236) hypothetical protein [ACE T6SS (CVF736)] [Escherichia coli O55:H7 str. CB9615]	VFG045926 (O3M_16610) fimbrial-like adhesin protein [E.coli laminin-binding fimbriae (ELF) (CVF824)] [Escherichia coli O104:H4 str. 2009EL-2050]	VFG045906 (O3M_16615) outer membrane usher protein [E.coli laminin-binding fimbriae (ELF) (CVF824)] [Escherichia coli O104:H4 str. 2009EL-2050]	VFG035722_gi:410484142_ (O3M_20335) type VI secretion system protein ImpG [ACE T6SS (CVF736)] [Escherichia coli O104:H4 str. 2009EL-2050]	VFG045950 (O3M_20925) major pilin subunit [Hemorrhagic E.coli pilus (HCP) (CVF825)] [Escherichia coli O104:H4 str. 2009EL-2050]	VFG045987 (O3M_20930) hypothetical protein [Hemorrhagic E.coli pilus (HCP) (CVF825)] [Escherichia coli O104:H4 str. 2009EL-2050]	VFG045875 (UMNK88_1093) major type 1 subunit fimbrin FimA [E.coli laminin-binding fimbriae (ELF) (CVF824)] [Escherichia coli UMNK88]	VFG045897 (UMNK88_1094) chaperone protein FocC [E.coli laminin-binding fimbriae (ELF) (CVF824)] [Escherichia coli UMNK88]	VFG045913 (UMNK88_1095) outer membrane usher protein FimD [E.coli laminin-binding fimbriae (ELF) (CVF824)] [Escherichia coli UMNK88]	VFG045933 (UMNK88_1096) hypothetical protein [E.coli laminin-binding fimbriae (ELF) (CVF824)] [Escherichia coli UMNK88]	VFG035729_gi:386612389_ (UMNK88_238) hypothetical protein [ACE T6SS (CVF736)] [Escherichia coli UMNK88]	VFG035710_gi:15799909_ (Z0260) hypothetical protein [EHS (SS185)] [Escherichia coli O157:H7 str. EDL933]
ECL19508	VFG046044 (APECO78_03970) type IV pilin biogenesis protein [Hemorrhagic E.coli pilus (HCP) (CVF825)] [Escherichia coli O78:H18 str. WS3294A]	VFG046007 (APECO78_03975) hypothetical protein [Hemorrhagic E.coli pilus (HCP) (CVF825)] [Escherichia coli O78:H18 str. WS3294A]	VFG045899 (APECO78_08685) periplasmic pilin chaperone [E.coli laminin-binding fimbriae (ELF) (CVF824)] [Escherichia coli O78:H18 str. WS3294A]	VFG045915 (APECO78_08690) outer membrane usher protein [E.coli laminin-binding fimbriae (ELF) (CVF824)] [Escherichia coli O78:H18 str. WS3294A]	VFG045935 (APECO78_08695) fimbrial-like adhesin protein [E.coli laminin-binding fimbriae (ELF) (CVF824)] [Escherichia coli O78:H18 str. WS3294A]	VFG045983 (CDCO157_0108) hypothetical protein [Hemorrhagic E.coli pilus (HCP) (CVF825)] [Escherichia coli O157:H7 str. Xuzhou21]	VFG045827 (EC958_1421) hemolysin E [Hemolysin/cytolysin A (CVF750)] [Escherichia coli O25b:H4-ST131]		VFG045826 (EC958_5138) Fluffing protein [Cah, AIDA-I type (CVF745)] [Escherichia coli O25b:H4-ST131]	VFG045862 (ECH74115_1100) fimbrial protein [E.coli laminin-binding fimbriae (ELF) (CVF824)] [Escherichia coli O157:H7 str. EC4115]	VFG045884 (ECH74115_1101) periplasmic pilus chaperone family protein [E.coli laminin-binding fimbriae (ELF) (CVF824)] [Escherichia coli O157:H7 str. EC4115]	VFG035720_gi:260842456_ (ECO103_0224) hypothetical protein [ACE T6SS (CVF736)] [Escherichia coli O103:H2 str. 12009]	VFG035721_gi:260866370_ (ECO111_0230) hypothetical protein [ACE T6SS (CVF736)] [Escherichia coli O111:H- str. 11128]	VFG045859 (ECO55CA74_05720) putative fimbrial-like adhesin protein [E.coli laminin-binding fimbriae (ELF) (CVF824)] [Escherichia coli O55:H7 str. RM12579]	VFG045881 (ECO55CA74_05725) chaperone [E.coli laminin-binding fimbriae (ELF) (CVF824)] [Escherichia coli O55:H7 str. RM12579]	VFG046031 (ECP_0106) type IV pilin biogenesis protein [Hemorrhagic E.coli pilus (HCP) (CVF825)] [Escherichia coli 536]	VFG045993 (ECP_0107) hypothetical protein [Hemorrhagic E.coli pilus (HCP) (CVF825)] [Escherichia coli 536]	VFG045956 (ECP_0108) major pilin subunit [Hemorrhagic E.coli pilus (HCP) (CVF825)] [Escherichia coli 536]	VFG043545_gi:218560235_ (ECS88_3547) lipoprotein NlpI [NlpI (AI331)] [Escherichia coli O45:K1:H7 str. S88]	VFG046082 (ECVR50_0238) hypothetical protein [ACE T6SS (CVF736)] [Escherichia coli VR50]	VFG046083 (ECVR50_0239) IcmF-related protein [ACE T6SS (CVF736)] [Escherichia coli VR50]	VFG046084 (ECVR50_0240) uncharacterized protein ImpA [ACE T6SS (CVF736)] [Escherichia coli VR50]	VFG046086 (ECVR50_0242) putative protease [ACE T6SS (CVF736)] [Escherichia coli VR50]	VFG046090 (ECVR50_0246) hypothetical protein [ACE T6SS (CVF736)] [Escherichia coli VR50]	VFG046091 (ECVR50_0247) hypothetical protein [ACE T6SS (CVF736)] [Escherichia coli VR50]	VFG046092 (ECVR50_0248) hypothetical protein [ACE T6SS (CVF736)] [Escherichia coli VR50]	VFG046093 (ECVR50_0249) hypothetical protein [ACE T6SS (CVF736)] [Escherichia coli VR50]	VFG046094 (ECVR50_0250) uncharacterized protein ImpC [ACE T6SS (CVF736)] [Escherichia coli VR50]	VFG046096 (ECVR50_0257) hypothetical protein [ACE T6SS (CVF736)] [Escherichia coli VR50]	VFG035711_gi:15829483_ (ECs0229) hypothetical protein [ACE T6SS (CVF736)] [Escherichia coli O157:H7 str. Sakai]	VFG042095_gi:15832966_ (ECs3712) hypothetical protein [ETT2 (SS017)] [Escherichia coli O157:H7 str. Sakai]	VFG046001 (ETEC_0103) protein transport protein HofB [Hemorrhagic E.coli pilus (HCP) (CVF825)] [Escherichia coli O78:H11:K80 str. H10407]	VFG045896 (ETEC_1007) periplasmic pilin chaperone [E.coli laminin-binding fimbriae (ELF) (CVF824)] [Escherichia coli O78:H11:K80 str. H10407]	VFG045912 (ETEC_1008) fimbrial outer membrane usher protein [E.coli laminin-binding fimbriae (ELF) (CVF824)] [Escherichia coli O78:H11:K80 str. H10407]	VFG045932 (ETEC_1011) fimbrial precursor [E.coli laminin-binding fimbriae (ELF) (CVF824)] [Escherichia coli O78:H11:K80 str. H10407]	VFG035728_gi:157155723_ (EcE24377A_0237) hypothetical protein [ACE T6SS (CVF736)] [Escherichia coli E24377A]	VFG045931 (EcE24377A_1056) fimbrial protein [E.coli laminin-binding fimbriae (ELF) (CVF824)] [Escherichia coli E24377A]	VFG035715_gi:291281048_ (G2583_0236) hypothetical protein [ACE T6SS (CVF736)] [Escherichia coli O55:H7 str. CB9615]	VFG045926 (O3M_16610) fimbrial-like adhesin protein [E.coli laminin-binding fimbriae (ELF) (CVF824)] [Escherichia coli O104:H4 str. 2009EL-2050]	VFG045906 (O3M_16615) outer membrane usher protein [E.coli laminin-binding fimbriae (ELF) (CVF824)] [Escherichia coli O104:H4 str. 2009EL-2050]	VFG035722_gi:410484142_ (O3M_20335) type VI secretion system protein ImpG [ACE T6SS (CVF736)] [Escherichia coli O104:H4 str. 2009EL-2050]	VFG045950 (O3M_20925) major pilin subunit [Hemorrhagic E.coli pilus (HCP) (CVF825)] [Escherichia coli O104:H4 str. 2009EL-2050]	VFG045987 (O3M_20930) hypothetical protein [Hemorrhagic E.coli pilus (HCP) (CVF825)] [Escherichia coli O104:H4 str. 2009EL-2050]	VFG045875 (UMNK88_1093) major type 1 subunit fimbrin FimA [E.coli laminin-binding fimbriae (ELF) (CVF824)] [Escherichia coli UMNK88]	VFG045897 (UMNK88_1094) chaperone protein FocC [E.coli laminin-binding fimbriae (ELF) (CVF824)] [Escherichia coli UMNK88]	VFG045913 (UMNK88_1095) outer membrane usher protein FimD [E.coli laminin-binding fimbriae (ELF) (CVF824)] [Escherichia coli UMNK88]	VFG045933 (UMNK88_1096) hypothetical protein [E.coli laminin-binding fimbriae (ELF) (CVF824)] [Escherichia coli UMNK88]	VFG035729_gi:386612389_ (UMNK88_238) hypothetical protein [ACE T6SS (CVF736)] [Escherichia coli UMNK88]	VFG035710_gi:15799909_ (Z0260) hypothetical protein [EHS (SS185)] [Escherichia coli O157:H7 str. EDL933]
ECL19517	VFG046044 (APECO78_03970) type IV pilin biogenesis protein [Hemorrhagic E.coli pilus (HCP) (CVF825)] [Escherichia coli O78:H18 str. WS3294A]	VFG046007 (APECO78_03975) hypothetical protein [Hemorrhagic E.coli pilus (HCP) (CVF825)] [Escherichia coli O78:H18 str. WS3294A]	VFG045899 (APECO78_08685) periplasmic pilin chaperone [E.coli laminin-binding fimbriae (ELF) (CVF824)] [Escherichia coli O78:H18 str. WS3294A]	VFG045915 (APECO78_08690) outer membrane usher protein [E.coli laminin-binding fimbriae (ELF) (CVF824)] [Escherichia coli O78:H18 str. WS3294A]	VFG045935 (APECO78_08695) fimbrial-like adhesin protein [E.coli laminin-binding fimbriae (ELF) (CVF824)] [Escherichia coli O78:H18 str. WS3294A]	VFG045983 (CDCO157_0108) hypothetical protein [Hemorrhagic E.coli pilus (HCP) (CVF825)] [Escherichia coli O157:H7 str. Xuzhou21]	VFG045827 (EC958_1421) hemolysin E [Hemolysin/cytolysin A (CVF750)] [Escherichia coli O25b:H4-ST131]	VFG045820 (EC958_4121) putative autotransporter [AIDA-I (CVF450)] [Escherichia coli O25b:H4-ST131]	VFG045826 (EC958_5138) Fluffing protein [Cah, AIDA-I type (CVF745)] [Escherichia coli O25b:H4-ST131]	VFG045862 (ECH74115_1100) fimbrial protein [E.coli laminin-binding fimbriae (ELF) (CVF824)] [Escherichia coli O157:H7 str. EC4115]	VFG045884 (ECH74115_1101) periplasmic pilus chaperone family protein [E.coli laminin-binding fimbriae (ELF) (CVF824)] [Escherichia coli O157:H7 str. EC4115]	VFG035720_gi:260842456_ (ECO103_0224) hypothetical protein [ACE T6SS (CVF736)] [Escherichia coli O103:H2 str. 12009]	VFG035721_gi:260866370_ (ECO111_0230) hypothetical protein [ACE T6SS (CVF736)] [Escherichia coli O111:H- str. 11128]	VFG045859 (ECO55CA74_05720) putative fimbrial-like adhesin protein [E.coli laminin-binding fimbriae (ELF) (CVF824)] [Escherichia coli O55:H7 str. RM12579]	VFG045881 (ECO55CA74_05725) chaperone [E.coli laminin-binding fimbriae (ELF) (CVF824)] [Escherichia coli O55:H7 str. RM12579]	VFG046031 (ECP_0106) type IV pilin biogenesis protein [Hemorrhagic E.coli pilus (HCP) (CVF825)] [Escherichia coli 536]	VFG045993 (ECP_0107) hypothetical protein [Hemorrhagic E.coli pilus (HCP) (CVF825)] [Escherichia coli 536]	VFG045956 (ECP_0108) major pilin subunit [Hemorrhagic E.coli pilus (HCP) (CVF825)] [Escherichia coli 536]	VFG043545_gi:218560235_ (ECS88_3547) lipoprotein NlpI [NlpI (AI331)] [Escherichia coli O45:K1:H7 str. S88]	VFG046082 (ECVR50_0238) hypothetical protein [ACE T6SS (CVF736)] [Escherichia coli VR50]	VFG046083 (ECVR50_0239) IcmF-related protein [ACE T6SS (CVF736)] [Escherichia coli VR50]	VFG046084 (ECVR50_0240) uncharacterized protein ImpA [ACE T6SS (CVF736)] [Escherichia coli VR50]	VFG046086 (ECVR50_0242) putative protease [ACE T6SS (CVF736)] [Escherichia coli VR50]	VFG046090 (ECVR50_0246) hypothetical protein [ACE T6SS (CVF736)] [Escherichia coli VR50]	VFG046091 (ECVR50_0247) hypothetical protein [ACE T6SS (CVF736)] [Escherichia coli VR50]	VFG046092 (ECVR50_0248) hypothetical protein [ACE T6SS (CVF736)] [Escherichia coli VR50]	VFG046093 (ECVR50_0249) hypothetical protein [ACE T6SS (CVF736)] [Escherichia coli VR50]	VFG046094 (ECVR50_0250) uncharacterized protein ImpC [ACE T6SS (CVF736)] [Escherichia coli VR50]	VFG046096 (ECVR50_0257) hypothetical protein [ACE T6SS (CVF736)] [Escherichia coli VR50]	VFG035711_gi:15829483_ (ECs0229) hypothetical protein [ACE T6SS (CVF736)] [Escherichia coli O157:H7 str. Sakai]	VFG042095_gi:15832966_ (ECs3712) hypothetical protein [ETT2 (SS017)] [Escherichia coli O157:H7 str. Sakai]	VFG046001 (ETEC_0103) protein transport protein HofB [Hemorrhagic E.coli pilus (HCP) (CVF825)] [Escherichia coli O78:H11:K80 str. H10407]	VFG045896 (ETEC_1007) periplasmic pilin chaperone [E.coli laminin-binding fimbriae (ELF) (CVF824)] [Escherichia coli O78:H11:K80 str. H10407]	VFG045912 (ETEC_1008) fimbrial outer membrane usher protein [E.coli laminin-binding fimbriae (ELF) (CVF824)] [Escherichia coli O78:H11:K80 str. H10407]	VFG045932 (ETEC_1011) fimbrial precursor [E.coli laminin-binding fimbriae (ELF) (CVF824)] [Escherichia coli O78:H11:K80 str. H10407]	VFG035728_gi:157155723_ (EcE24377A_0237) hypothetical protein [ACE T6SS (CVF736)] [Escherichia coli E24377A]	VFG045931 (EcE24377A_1056) fimbrial protein [E.coli laminin-binding fimbriae (ELF) (CVF824)] [Escherichia coli E24377A]	VFG035715_gi:291281048_ (G2583_0236) hypothetical protein [ACE T6SS (CVF736)] [Escherichia coli O55:H7 str. CB9615]	VFG045926 (O3M_16610) fimbrial-like adhesin protein [E.coli laminin-binding fimbriae (ELF) (CVF824)] [Escherichia coli O104:H4 str. 2009EL-2050]	VFG045906 (O3M_16615) outer membrane usher protein [E.coli laminin-binding fimbriae (ELF) (CVF824)] [Escherichia coli O104:H4 str. 2009EL-2050]	VFG035722_gi:410484142_ (O3M_20335) type VI secretion system protein ImpG [ACE T6SS (CVF736)] [Escherichia coli O104:H4 str. 2009EL-2050]	VFG045950 (O3M_20925) major pilin subunit [Hemorrhagic E.coli pilus (HCP) (CVF825)] [Escherichia coli O104:H4 str. 2009EL-2050]	VFG045987 (O3M_20930) hypothetical protein [Hemorrhagic E.coli pilus (HCP) (CVF825)] [Escherichia coli O104:H4 str. 2009EL-2050]	VFG045875 (UMNK88_1093) major type 1 subunit fimbrin FimA [E.coli laminin-binding fimbriae (ELF) (CVF824)] [Escherichia coli UMNK88]	VFG045897 (UMNK88_1094) chaperone protein FocC [E.coli laminin-binding fimbriae (ELF) (CVF824)] [Escherichia coli UMNK88]	VFG045913 (UMNK88_1095) outer membrane usher protein FimD [E.coli laminin-binding fimbriae (ELF) (CVF824)] [Escherichia coli UMNK88]	VFG045933 (UMNK88_1096) hypothetical protein [E.coli laminin-binding fimbriae (ELF) (CVF824)] [Escherichia coli UMNK88]	VFG035729_gi:386612389_ (UMNK88_238) hypothetical protein [ACE T6SS (CVF736)] [Escherichia coli UMNK88]	VFG035710_gi:15799909_ (Z0260) hypothetical protein [EHS (SS185)] [Escherichia coli O157:H7 str. EDL933]
ECL19555	VFG046044 (APECO78_03970) type IV pilin biogenesis protein [Hemorrhagic E.coli pilus (HCP) (CVF825)] [Escherichia coli O78:H18 str. WS3294A]	VFG046007 (APECO78_03975) hypothetical protein [Hemorrhagic E.coli pilus (HCP) (CVF825)] [Escherichia coli O78:H18 str. WS3294A]	VFG045899 (APECO78_08685) periplasmic pilin chaperone [E.coli laminin-binding fimbriae (ELF) (CVF824)] [Escherichia coli O78:H18 str. WS3294A]	VFG045915 (APECO78_08690) outer membrane usher protein [E.coli laminin-binding fimbriae (ELF) (CVF824)] [Escherichia coli O78:H18 str. WS3294A]	VFG045935 (APECO78_08695) fimbrial-like adhesin protein [E.coli laminin-binding fimbriae (ELF) (CVF824)] [Escherichia coli O78:H18 str. WS3294A]	VFG045983 (CDCO157_0108) hypothetical protein [Hemorrhagic E.coli pilus (HCP) (CVF825)] [Escherichia coli O157:H7 str. Xuzhou21]	VFG045827 (EC958_1421) hemolysin E [Hemolysin/cytolysin A (CVF750)] [Escherichia coli O25b:H4-ST131]		VFG045826 (EC958_5138) Fluffing protein [Cah, AIDA-I type (CVF745)] [Escherichia coli O25b:H4-ST131]	VFG045862 (ECH74115_1100) fimbrial protein [E.coli laminin-binding fimbriae (ELF) (CVF824)] [Escherichia coli O157:H7 str. EC4115]	VFG045884 (ECH74115_1101) periplasmic pilus chaperone family protein [E.coli laminin-binding fimbriae (ELF) (CVF824)] [Escherichia coli O157:H7 str. EC4115]	VFG035720_gi:260842456_ (ECO103_0224) hypothetical protein [ACE T6SS (CVF736)] [Escherichia coli O103:H2 str. 12009]	VFG035721_gi:260866370_ (ECO111_0230) hypothetical protein [ACE T6SS (CVF736)] [Escherichia coli O111:H- str. 11128]	VFG045859 (ECO55CA74_05720) putative fimbrial-like adhesin protein [E.coli laminin-binding fimbriae (ELF) (CVF824)] [Escherichia coli O55:H7 str. RM12579]	VFG045881 (ECO55CA74_05725) chaperone [E.coli laminin-binding fimbriae (ELF) (CVF824)] [Escherichia coli O55:H7 str. RM12579]	VFG046031 (ECP_0106) type IV pilin biogenesis protein [Hemorrhagic E.coli pilus (HCP) (CVF825)] [Escherichia coli 536]	VFG045993 (ECP_0107) hypothetical protein [Hemorrhagic E.coli pilus (HCP) (CVF825)] [Escherichia coli 536]	VFG045956 (ECP_0108) major pilin subunit [Hemorrhagic E.coli pilus (HCP) (CVF825)] [Escherichia coli 536]	VFG043545_gi:218560235_ (ECS88_3547) lipoprotein NlpI [NlpI (AI331)] [Escherichia coli O45:K1:H7 str. S88]	VFG046082 (ECVR50_0238) hypothetical protein [ACE T6SS (CVF736)] [Escherichia coli VR50]	VFG046083 (ECVR50_0239) IcmF-related protein [ACE T6SS (CVF736)] [Escherichia coli VR50]	VFG046084 (ECVR50_0240) uncharacterized protein ImpA [ACE T6SS (CVF736)] [Escherichia coli VR50]	VFG046086 (ECVR50_0242) putative protease [ACE T6SS (CVF736)] [Escherichia coli VR50]	VFG046090 (ECVR50_0246) hypothetical protein [ACE T6SS (CVF736)] [Escherichia coli VR50]	VFG046091 (ECVR50_0247) hypothetical protein [ACE T6SS (CVF736)] [Escherichia coli VR50]	VFG046092 (ECVR50_0248) hypothetical protein [ACE T6SS (CVF736)] [Escherichia coli VR50]	VFG046093 (ECVR50_0249) hypothetical protein [ACE T6SS (CVF736)] [Escherichia coli VR50]	VFG046094 (ECVR50_0250) uncharacterized protein ImpC [ACE T6SS (CVF736)] [Escherichia coli VR50]	VFG046096 (ECVR50_0257) hypothetical protein [ACE T6SS (CVF736)] [Escherichia coli VR50]	VFG035711_gi:15829483_ (ECs0229) hypothetical protein [ACE T6SS (CVF736)] [Escherichia coli O157:H7 str. Sakai]	VFG042095_gi:15832966_ (ECs3712) hypothetical protein [ETT2 (SS017)] [Escherichia coli O157:H7 str. Sakai]	VFG046001 (ETEC_0103) protein transport protein HofB [Hemorrhagic E.coli pilus (HCP) (CVF825)] [Escherichia coli O78:H11:K80 str. H10407]	VFG045896 (ETEC_1007) periplasmic pilin chaperone [E.coli laminin-binding fimbriae (ELF) (CVF824)] [Escherichia coli O78:H11:K80 str. H10407]	VFG045912 (ETEC_1008) fimbrial outer membrane usher protein [E.coli laminin-binding fimbriae (ELF) (CVF824)] [Escherichia coli O78:H11:K80 str. H10407]	VFG045932 (ETEC_1011) fimbrial precursor [E.coli laminin-binding fimbriae (ELF) (CVF824)] [Escherichia coli O78:H11:K80 str. H10407]	VFG035728_gi:157155723_ (EcE24377A_0237) hypothetical protein [ACE T6SS (CVF736)] [Escherichia coli E24377A]	VFG045931 (EcE24377A_1056) fimbrial protein [E.coli laminin-binding fimbriae (ELF) (CVF824)] [Escherichia coli E24377A]	VFG035715_gi:291281048_ (G2583_0236) hypothetical protein [ACE T6SS (CVF736)] [Escherichia coli O55:H7 str. CB9615]	VFG045926 (O3M_16610) fimbrial-like adhesin protein [E.coli laminin-binding fimbriae (ELF) (CVF824)] [Escherichia coli O104:H4 str. 2009EL-2050]	VFG045906 (O3M_16615) outer membrane usher protein [E.coli laminin-binding fimbriae (ELF) (CVF824)] [Escherichia coli O104:H4 str. 2009EL-2050]	VFG035722_gi:410484142_ (O3M_20335) type VI secretion system protein ImpG [ACE T6SS (CVF736)] [Escherichia coli O104:H4 str. 2009EL-2050]	VFG045950 (O3M_20925) major pilin subunit [Hemorrhagic E.coli pilus (HCP) (CVF825)] [Escherichia coli O104:H4 str. 2009EL-2050]	VFG045987 (O3M_20930) hypothetical protein [Hemorrhagic E.coli pilus (HCP) (CVF825)] [Escherichia coli O104:H4 str. 2009EL-2050]	VFG045875 (UMNK88_1093) major type 1 subunit fimbrin FimA [E.coli laminin-binding fimbriae (ELF) (CVF824)] [Escherichia coli UMNK88]	VFG045897 (UMNK88_1094) chaperone protein FocC [E.coli laminin-binding fimbriae (ELF) (CVF824)] [Escherichia coli UMNK88]	VFG045913 (UMNK88_1095) outer membrane usher protein FimD [E.coli laminin-binding fimbriae (ELF) (CVF824)] [Escherichia coli UMNK88]	VFG045933 (UMNK88_1096) hypothetical protein [E.coli laminin-binding fimbriae (ELF) (CVF824)] [Escherichia coli UMNK88]	VFG035729_gi:386612389_ (UMNK88_238) hypothetical protein [ACE T6SS (CVF736)] [Escherichia coli UMNK88]	VFG035710_gi:15799909_ (Z0260) hypothetical protein [EHS (SS185)] [Escherichia coli O157:H7 str. EDL933]
ECL19602	VFG046044 (APECO78_03970) type IV pilin biogenesis protein [Hemorrhagic E.coli pilus (HCP) (CVF825)] [Escherichia coli O78:H18 str. WS3294A]	VFG046007 (APECO78_03975) hypothetical protein [Hemorrhagic E.coli pilus (HCP) (CVF825)] [Escherichia coli O78:H18 str. WS3294A]	VFG045899 (APECO78_08685) periplasmic pilin chaperone [E.coli laminin-binding fimbriae (ELF) (CVF824)] [Escherichia coli O78:H18 str. WS3294A]	VFG045915 (APECO78_08690) outer membrane usher protein [E.coli laminin-binding fimbriae (ELF) (CVF824)] [Escherichia coli O78:H18 str. WS3294A]	VFG045935 (APECO78_08695) fimbrial-like adhesin protein [E.coli laminin-binding fimbriae (ELF) (CVF824)] [Escherichia coli O78:H18 str. WS3294A]	VFG045983 (CDCO157_0108) hypothetical protein [Hemorrhagic E.coli pilus (HCP) (CVF825)] [Escherichia coli O157:H7 str. Xuzhou21]	VFG045827 (EC958_1421) hemolysin E [Hemolysin/cytolysin A (CVF750)] [Escherichia coli O25b:H4-ST131]				VFG045884 (ECH74115_1101) periplasmic pilus chaperone family protein [E.coli laminin-binding fimbriae (ELF) (CVF824)] [Escherichia coli O157:H7 str. EC4115]				VFG045881 (ECO55CA74_05725) chaperone [E.coli laminin-binding fimbriae (ELF) (CVF824)] [Escherichia coli O55:H7 str. RM12579]	VFG046031 (ECP_0106) type IV pilin biogenesis protein [Hemorrhagic E.coli pilus (HCP) (CVF825)] [Escherichia coli 536]	VFG045993 (ECP_0107) hypothetical protein [Hemorrhagic E.coli pilus (HCP) (CVF825)] [Escherichia coli 536]	VFG045956 (ECP_0108) major pilin subunit [Hemorrhagic E.coli pilus (HCP) (CVF825)] [Escherichia coli 536]	VFG043545_gi:218560235_ (ECS88_3547) lipoprotein NlpI [NlpI (AI331)] [Escherichia coli O45:K1:H7 str. S88]												VFG042095_gi:15832966_ (ECs3712) hypothetical protein [ETT2 (SS017)] [Escherichia coli O157:H7 str. Sakai]	VFG046001 (ETEC_0103) protein transport protein HofB [Hemorrhagic E.coli pilus (HCP) (CVF825)] [Escherichia coli O78:H11:K80 str. H10407]	VFG045896 (ETEC_1007) periplasmic pilin chaperone [E.coli laminin-binding fimbriae (ELF) (CVF824)] [Escherichia coli O78:H11:K80 str. H10407]	VFG045912 (ETEC_1008) fimbrial outer membrane usher protein [E.coli laminin-binding fimbriae (ELF) (CVF824)] [Escherichia coli O78:H11:K80 str. H10407]	VFG045932 (ETEC_1011) fimbrial precursor [E.coli laminin-binding fimbriae (ELF) (CVF824)] [Escherichia coli O78:H11:K80 str. H10407]		VFG045931 (EcE24377A_1056) fimbrial protein [E.coli laminin-binding fimbriae (ELF) (CVF824)] [Escherichia coli E24377A]		VFG045926 (O3M_16610) fimbrial-like adhesin protein [E.coli laminin-binding fimbriae (ELF) (CVF824)] [Escherichia coli O104:H4 str. 2009EL-2050]	VFG045906 (O3M_16615) outer membrane usher protein [E.coli laminin-binding fimbriae (ELF) (CVF824)] [Escherichia coli O104:H4 str. 2009EL-2050]		VFG045950 (O3M_20925) major pilin subunit [Hemorrhagic E.coli pilus (HCP) (CVF825)] [Escherichia coli O104:H4 str. 2009EL-2050]	VFG045987 (O3M_20930) hypothetical protein [Hemorrhagic E.coli pilus (HCP) (CVF825)] [Escherichia coli O104:H4 str. 2009EL-2050]		VFG045897 (UMNK88_1094) chaperone protein FocC [E.coli laminin-binding fimbriae (ELF) (CVF824)] [Escherichia coli UMNK88]	VFG045913 (UMNK88_1095) outer membrane usher protein FimD [E.coli laminin-binding fimbriae (ELF) (CVF824)] [Escherichia coli UMNK88]	VFG045933 (UMNK88_1096) hypothetical protein [E.coli laminin-binding fimbriae (ELF) (CVF824)] [Escherichia coli UMNK88]
ECL19641	VFG046044 (APECO78_03970) type IV pilin biogenesis protein [Hemorrhagic E.coli pilus (HCP) (CVF825)] [Escherichia coli O78:H18 str. WS3294A]	VFG046007 (APECO78_03975) hypothetical protein [Hemorrhagic E.coli pilus (HCP) (CVF825)] [Escherichia coli O78:H18 str. WS3294A]	VFG045899 (APECO78_08685) periplasmic pilin chaperone [E.coli laminin-binding fimbriae (ELF) (CVF824)] [Escherichia coli O78:H18 str. WS3294A]	VFG045915 (APECO78_08690) outer membrane usher protein [E.coli laminin-binding fimbriae (ELF) (CVF824)] [Escherichia coli O78:H18 str. WS3294A]	VFG045935 (APECO78_08695) fimbrial-like adhesin protein [E.coli laminin-binding fimbriae (ELF) (CVF824)] [Escherichia coli O78:H18 str. WS3294A]	VFG045983 (CDCO157_0108) hypothetical protein [Hemorrhagic E.coli pilus (HCP) (CVF825)] [Escherichia coli O157:H7 str. Xuzhou21]	VFG045827 (EC958_1421) hemolysin E [Hemolysin/cytolysin A (CVF750)] [Escherichia coli O25b:H4-ST131]		VFG045826 (EC958_5138) Fluffing protein [Cah, AIDA-I type (CVF745)] [Escherichia coli O25b:H4-ST131]	VFG045862 (ECH74115_1100) fimbrial protein [E.coli laminin-binding fimbriae (ELF) (CVF824)] [Escherichia coli O157:H7 str. EC4115]	VFG045884 (ECH74115_1101) periplasmic pilus chaperone family protein [E.coli laminin-binding fimbriae (ELF) (CVF824)] [Escherichia coli O157:H7 str. EC4115]	VFG035720_gi:260842456_ (ECO103_0224) hypothetical protein [ACE T6SS (CVF736)] [Escherichia coli O103:H2 str. 12009]	VFG035721_gi:260866370_ (ECO111_0230) hypothetical protein [ACE T6SS (CVF736)] [Escherichia coli O111:H- str. 11128]	VFG045859 (ECO55CA74_05720) putative fimbrial-like adhesin protein [E.coli laminin-binding fimbriae (ELF) (CVF824)] [Escherichia coli O55:H7 str. RM12579]	VFG045881 (ECO55CA74_05725) chaperone [E.coli laminin-binding fimbriae (ELF) (CVF824)] [Escherichia coli O55:H7 str. RM12579]	VFG046031 (ECP_0106) type IV pilin biogenesis protein [Hemorrhagic E.coli pilus (HCP) (CVF825)] [Escherichia coli 536]	VFG045993 (ECP_0107) hypothetical protein [Hemorrhagic E.coli pilus (HCP) (CVF825)] [Escherichia coli 536]	VFG045956 (ECP_0108) major pilin subunit [Hemorrhagic E.coli pilus (HCP) (CVF825)] [Escherichia coli 536]	VFG043545_gi:218560235_ (ECS88_3547) lipoprotein NlpI [NlpI (AI331)] [Escherichia coli O45:K1:H7 str. S88]	VFG046082 (ECVR50_0238) hypothetical protein [ACE T6SS (CVF736)] [Escherichia coli VR50]	VFG046083 (ECVR50_0239) IcmF-related protein [ACE T6SS (CVF736)] [Escherichia coli VR50]	VFG046084 (ECVR50_0240) uncharacterized protein ImpA [ACE T6SS (CVF736)] [Escherichia coli VR50]	VFG046086 (ECVR50_0242) putative protease [ACE T6SS (CVF736)] [Escherichia coli VR50]	VFG046090 (ECVR50_0246) hypothetical protein [ACE T6SS (CVF736)] [Escherichia coli VR50]	VFG046091 (ECVR50_0247) hypothetical protein [ACE T6SS (CVF736)] [Escherichia coli VR50]	VFG046092 (ECVR50_0248) hypothetical protein [ACE T6SS (CVF736)] [Escherichia coli VR50]	VFG046093 (ECVR50_0249) hypothetical protein [ACE T6SS (CVF736)] [Escherichia coli VR50]	VFG046094 (ECVR50_0250) uncharacterized protein ImpC [ACE T6SS (CVF736)] [Escherichia coli VR50]	VFG046096 (ECVR50_0257) hypothetical protein [ACE T6SS (CVF736)] [Escherichia coli VR50]	VFG035711_gi:15829483_ (ECs0229) hypothetical protein [ACE T6SS (CVF736)] [Escherichia coli O157:H7 str. Sakai]	VFG042095_gi:15832966_ (ECs3712) hypothetical protein [ETT2 (SS017)] [Escherichia coli O157:H7 str. Sakai]	VFG046001 (ETEC_0103) protein transport protein HofB [Hemorrhagic E.coli pilus (HCP) (CVF825)] [Escherichia coli O78:H11:K80 str. H10407]	VFG045896 (ETEC_1007) periplasmic pilin chaperone [E.coli laminin-binding fimbriae (ELF) (CVF824)] [Escherichia coli O78:H11:K80 str. H10407]	VFG045912 (ETEC_1008) fimbrial outer membrane usher protein [E.coli laminin-binding fimbriae (ELF) (CVF824)] [Escherichia coli O78:H11:K80 str. H10407]	VFG045932 (ETEC_1011) fimbrial precursor [E.coli laminin-binding fimbriae (ELF) (CVF824)] [Escherichia coli O78:H11:K80 str. H10407]	VFG035728_gi:157155723_ (EcE24377A_0237) hypothetical protein [ACE T6SS (CVF736)] [Escherichia coli E24377A]	VFG045931 (EcE24377A_1056) fimbrial protein [E.coli laminin-binding fimbriae (ELF) (CVF824)] [Escherichia coli E24377A]	VFG035715_gi:291281048_ (G2583_0236) hypothetical protein [ACE T6SS (CVF736)] [Escherichia coli O55:H7 str. CB9615]	VFG045926 (O3M_16610) fimbrial-like adhesin protein [E.coli laminin-binding fimbriae (ELF) (CVF824)] [Escherichia coli O104:H4 str. 2009EL-2050]	VFG045906 (O3M_16615) outer membrane usher protein [E.coli laminin-binding fimbriae (ELF) (CVF824)] [Escherichia coli O104:H4 str. 2009EL-2050]	VFG035722_gi:410484142_ (O3M_20335) type VI secretion system protein ImpG [ACE T6SS (CVF736)] [Escherichia coli O104:H4 str. 2009EL-2050]	VFG045950 (O3M_20925) major pilin subunit [Hemorrhagic E.coli pilus (HCP) (CVF825)] [Escherichia coli O104:H4 str. 2009EL-2050]	VFG045987 (O3M_20930) hypothetical protein [Hemorrhagic E.coli pilus (HCP) (CVF825)] [Escherichia coli O104:H4 str. 2009EL-2050]	VFG045875 (UMNK88_1093) major type 1 subunit fimbrin FimA [E.coli laminin-binding fimbriae (ELF) (CVF824)] [Escherichia coli UMNK88]	VFG045897 (UMNK88_1094) chaperone protein FocC [E.coli laminin-binding fimbriae (ELF) (CVF824)] [Escherichia coli UMNK88]	VFG045913 (UMNK88_1095) outer membrane usher protein FimD [E.coli laminin-binding fimbriae (ELF) (CVF824)] [Escherichia coli UMNK88]	VFG045933 (UMNK88_1096) hypothetical protein [E.coli laminin-binding fimbriae (ELF) (CVF824)] [Escherichia coli UMNK88]	VFG035729_gi:386612389_ (UMNK88_238) hypothetical protein [ACE T6SS (CVF736)] [Escherichia coli UMNK88]	VFG035710_gi:15799909_ (Z0260) hypothetical protein [EHS (SS185)] [Escherichia coli O157:H7 str. EDL933]
ECL19664	VFG046044 (APECO78_03970) type IV pilin biogenesis protein [Hemorrhagic E.coli pilus (HCP) (CVF825)] [Escherichia coli O78:H18 str. WS3294A]	VFG046007 (APECO78_03975) hypothetical protein [Hemorrhagic E.coli pilus (HCP) (CVF825)] [Escherichia coli O78:H18 str. WS3294A]	VFG045899 (APECO78_08685) periplasmic pilin chaperone [E.coli laminin-binding fimbriae (ELF) (CVF824)] [Escherichia coli O78:H18 str. WS3294A]	VFG045915 (APECO78_08690) outer membrane usher protein [E.coli laminin-binding fimbriae (ELF) (CVF824)] [Escherichia coli O78:H18 str. WS3294A]	VFG045935 (APECO78_08695) fimbrial-like adhesin protein [E.coli laminin-binding fimbriae (ELF) (CVF824)] [Escherichia coli O78:H18 str. WS3294A]	VFG045983 (CDCO157_0108) hypothetical protein [Hemorrhagic E.coli pilus (HCP) (CVF825)] [Escherichia coli O157:H7 str. Xuzhou21]	VFG045827 (EC958_1421) hemolysin E [Hemolysin/cytolysin A (CVF750)] [Escherichia coli O25b:H4-ST131]			VFG045862 (ECH74115_1100) fimbrial protein [E.coli laminin-binding fimbriae (ELF) (CVF824)] [Escherichia coli O157:H7 str. EC4115]	VFG045884 (ECH74115_1101) periplasmic pilus chaperone family protein [E.coli laminin-binding fimbriae (ELF) (CVF824)] [Escherichia coli O157:H7 str. EC4115]	VFG035720_gi:260842456_ (ECO103_0224) hypothetical protein [ACE T6SS (CVF736)] [Escherichia coli O103:H2 str. 12009]	VFG035721_gi:260866370_ (ECO111_0230) hypothetical protein [ACE T6SS (CVF736)] [Escherichia coli O111:H- str. 11128]	VFG045859 (ECO55CA74_05720) putative fimbrial-like adhesin protein [E.coli laminin-binding fimbriae (ELF) (CVF824)] [Escherichia coli O55:H7 str. RM12579]	VFG045881 (ECO55CA74_05725) chaperone [E.coli laminin-binding fimbriae (ELF) (CVF824)] [Escherichia coli O55:H7 str. RM12579]	VFG046031 (ECP_0106) type IV pilin biogenesis protein [Hemorrhagic E.coli pilus (HCP) (CVF825)] [Escherichia coli 536]	VFG045993 (ECP_0107) hypothetical protein [Hemorrhagic E.coli pilus (HCP) (CVF825)] [Escherichia coli 536]	VFG045956 (ECP_0108) major pilin subunit [Hemorrhagic E.coli pilus (HCP) (CVF825)] [Escherichia coli 536]	VFG043545_gi:218560235_ (ECS88_3547) lipoprotein NlpI [NlpI (AI331)] [Escherichia coli O45:K1:H7 str. S88]	VFG046082 (ECVR50_0238) hypothetical protein [ACE T6SS (CVF736)] [Escherichia coli VR50]	VFG046083 (ECVR50_0239) IcmF-related protein [ACE T6SS (CVF736)] [Escherichia coli VR50]	VFG046084 (ECVR50_0240) uncharacterized protein ImpA [ACE T6SS (CVF736)] [Escherichia coli VR50]	VFG046086 (ECVR50_0242) putative protease [ACE T6SS (CVF736)] [Escherichia coli VR50]	VFG046090 (ECVR50_0246) hypothetical protein [ACE T6SS (CVF736)] [Escherichia coli VR50]	VFG046091 (ECVR50_0247) hypothetical protein [ACE T6SS (CVF736)] [Escherichia coli VR50]	VFG046092 (ECVR50_0248) hypothetical protein [ACE T6SS (CVF736)] [Escherichia coli VR50]	VFG046093 (ECVR50_0249) hypothetical protein [ACE T6SS (CVF736)] [Escherichia coli VR50]	VFG046094 (ECVR50_0250) uncharacterized protein ImpC [ACE T6SS (CVF736)] [Escherichia coli VR50]	VFG046096 (ECVR50_0257) hypothetical protein [ACE T6SS (CVF736)] [Escherichia coli VR50]	VFG035711_gi:15829483_ (ECs0229) hypothetical protein [ACE T6SS (CVF736)] [Escherichia coli O157:H7 str. Sakai]	VFG042095_gi:15832966_ (ECs3712) hypothetical protein [ETT2 (SS017)] [Escherichia coli O157:H7 str. Sakai]	VFG046001 (ETEC_0103) protein transport protein HofB [Hemorrhagic E.coli pilus (HCP) (CVF825)] [Escherichia coli O78:H11:K80 str. H10407]	VFG045896 (ETEC_1007) periplasmic pilin chaperone [E.coli laminin-binding fimbriae (ELF) (CVF824)] [Escherichia coli O78:H11:K80 str. H10407]	VFG045912 (ETEC_1008) fimbrial outer membrane usher protein [E.coli laminin-binding fimbriae (ELF) (CVF824)] [Escherichia coli O78:H11:K80 str. H10407]	VFG045932 (ETEC_1011) fimbrial precursor [E.coli laminin-binding fimbriae (ELF) (CVF824)] [Escherichia coli O78:H11:K80 str. H10407]	VFG035728_gi:157155723_ (EcE24377A_0237) hypothetical protein [ACE T6SS (CVF736)] [Escherichia coli E24377A]	VFG045931 (EcE24377A_1056) fimbrial protein [E.coli laminin-binding fimbriae (ELF) (CVF824)] [Escherichia coli E24377A]	VFG035715_gi:291281048_ (G2583_0236) hypothetical protein [ACE T6SS (CVF736)] [Escherichia coli O55:H7 str. CB9615]	VFG045926 (O3M_16610) fimbrial-like adhesin protein [E.coli laminin-binding fimbriae (ELF) (CVF824)] [Escherichia coli O104:H4 str. 2009EL-2050]	VFG045906 (O3M_16615) outer membrane usher protein [E.coli laminin-binding fimbriae (ELF) (CVF824)] [Escherichia coli O104:H4 str. 2009EL-2050]	VFG035722_gi:410484142_ (O3M_20335) type VI secretion system protein ImpG [ACE T6SS (CVF736)] [Escherichia coli O104:H4 str. 2009EL-2050]	VFG045950 (O3M_20925) major pilin subunit [Hemorrhagic E.coli pilus (HCP) (CVF825)] [Escherichia coli O104:H4 str. 2009EL-2050]	VFG045987 (O3M_20930) hypothetical protein [Hemorrhagic E.coli pilus (HCP) (CVF825)] [Escherichia coli O104:H4 str. 2009EL-2050]	VFG045875 (UMNK88_1093) major type 1 subunit fimbrin FimA [E.coli laminin-binding fimbriae (ELF) (CVF824)] [Escherichia coli UMNK88]	VFG045897 (UMNK88_1094) chaperone protein FocC [E.coli laminin-binding fimbriae (ELF) (CVF824)] [Escherichia coli UMNK88]	VFG045913 (UMNK88_1095) outer membrane usher protein FimD [E.coli laminin-binding fimbriae (ELF) (CVF824)] [Escherichia coli UMNK88]	VFG045933 (UMNK88_1096) hypothetical protein [E.coli laminin-binding fimbriae (ELF) (CVF824)] [Escherichia coli UMNK88]	VFG035729_gi:386612389_ (UMNK88_238) hypothetical protein [ACE T6SS (CVF736)] [Escherichia coli UMNK88]	VFG035710_gi:15799909_ (Z0260) hypothetical protein [EHS (SS185)] [Escherichia coli O157:H7 str. EDL933]
ECL19668	VFG046044 (APECO78_03970) type IV pilin biogenesis protein [Hemorrhagic E.coli pilus (HCP) (CVF825)] [Escherichia coli O78:H18 str. WS3294A]	VFG046007 (APECO78_03975) hypothetical protein [Hemorrhagic E.coli pilus (HCP) (CVF825)] [Escherichia coli O78:H18 str. WS3294A]	VFG045899 (APECO78_08685) periplasmic pilin chaperone [E.coli laminin-binding fimbriae (ELF) (CVF824)] [Escherichia coli O78:H18 str. WS3294A]	VFG045915 (APECO78_08690) outer membrane usher protein [E.coli laminin-binding fimbriae (ELF) (CVF824)] [Escherichia coli O78:H18 str. WS3294A]	VFG045935 (APECO78_08695) fimbrial-like adhesin protein [E.coli laminin-binding fimbriae (ELF) (CVF824)] [Escherichia coli O78:H18 str. WS3294A]	VFG045983 (CDCO157_0108) hypothetical protein [Hemorrhagic E.coli pilus (HCP) (CVF825)] [Escherichia coli O157:H7 str. Xuzhou21]	VFG045827 (EC958_1421) hemolysin E [Hemolysin/cytolysin A (CVF750)] [Escherichia coli O25b:H4-ST131]		VFG045826 (EC958_5138) Fluffing protein [Cah, AIDA-I type (CVF745)] [Escherichia coli O25b:H4-ST131]	VFG045862 (ECH74115_1100) fimbrial protein [E.coli laminin-binding fimbriae (ELF) (CVF824)] [Escherichia coli O157:H7 str. EC4115]	VFG045884 (ECH74115_1101) periplasmic pilus chaperone family protein [E.coli laminin-binding fimbriae (ELF) (CVF824)] [Escherichia coli O157:H7 str. EC4115]	VFG035720_gi:260842456_ (ECO103_0224) hypothetical protein [ACE T6SS (CVF736)] [Escherichia coli O103:H2 str. 12009]	VFG035721_gi:260866370_ (ECO111_0230) hypothetical protein [ACE T6SS (CVF736)] [Escherichia coli O111:H- str. 11128]	VFG045859 (ECO55CA74_05720) putative fimbrial-like adhesin protein [E.coli laminin-binding fimbriae (ELF) (CVF824)] [Escherichia coli O55:H7 str. RM12579]	VFG045881 (ECO55CA74_05725) chaperone [E.coli laminin-binding fimbriae (ELF) (CVF824)] [Escherichia coli O55:H7 str. RM12579]	VFG046031 (ECP_0106) type IV pilin biogenesis protein [Hemorrhagic E.coli pilus (HCP) (CVF825)] [Escherichia coli 536]	VFG045993 (ECP_0107) hypothetical protein [Hemorrhagic E.coli pilus (HCP) (CVF825)] [Escherichia coli 536]	VFG045956 (ECP_0108) major pilin subunit [Hemorrhagic E.coli pilus (HCP) (CVF825)] [Escherichia coli 536]	VFG043545_gi:218560235_ (ECS88_3547) lipoprotein NlpI [NlpI (AI331)] [Escherichia coli O45:K1:H7 str. S88]	VFG046082 (ECVR50_0238) hypothetical protein [ACE T6SS (CVF736)] [Escherichia coli VR50]	VFG046083 (ECVR50_0239) IcmF-related protein [ACE T6SS (CVF736)] [Escherichia coli VR50]	VFG046084 (ECVR50_0240) uncharacterized protein ImpA [ACE T6SS (CVF736)] [Escherichia coli VR50]	VFG046086 (ECVR50_0242) putative protease [ACE T6SS (CVF736)] [Escherichia coli VR50]	VFG046090 (ECVR50_0246) hypothetical protein [ACE T6SS (CVF736)] [Escherichia coli VR50]	VFG046091 (ECVR50_0247) hypothetical protein [ACE T6SS (CVF736)] [Escherichia coli VR50]	VFG046092 (ECVR50_0248) hypothetical protein [ACE T6SS (CVF736)] [Escherichia coli VR50]	VFG046093 (ECVR50_0249) hypothetical protein [ACE T6SS (CVF736)] [Escherichia coli VR50]	VFG046094 (ECVR50_0250) uncharacterized protein ImpC [ACE T6SS (CVF736)] [Escherichia coli VR50]	VFG046096 (ECVR50_0257) hypothetical protein [ACE T6SS (CVF736)] [Escherichia coli VR50]	VFG035711_gi:15829483_ (ECs0229) hypothetical protein [ACE T6SS (CVF736)] [Escherichia coli O157:H7 str. Sakai]	VFG042095_gi:15832966_ (ECs3712) hypothetical protein [ETT2 (SS017)] [Escherichia coli O157:H7 str. Sakai]	VFG046001 (ETEC_0103) protein transport protein HofB [Hemorrhagic E.coli pilus (HCP) (CVF825)] [Escherichia coli O78:H11:K80 str. H10407]	VFG045896 (ETEC_1007) periplasmic pilin chaperone [E.coli laminin-binding fimbriae (ELF) (CVF824)] [Escherichia coli O78:H11:K80 str. H10407]	VFG045912 (ETEC_1008) fimbrial outer membrane usher protein [E.coli laminin-binding fimbriae (ELF) (CVF824)] [Escherichia coli O78:H11:K80 str. H10407]	VFG045932 (ETEC_1011) fimbrial precursor [E.coli laminin-binding fimbriae (ELF) (CVF824)] [Escherichia coli O78:H11:K80 str. H10407]	VFG035728_gi:157155723_ (EcE24377A_0237) hypothetical protein [ACE T6SS (CVF736)] [Escherichia coli E24377A]	VFG045931 (EcE24377A_1056) fimbrial protein [E.coli laminin-binding fimbriae (ELF) (CVF824)] [Escherichia coli E24377A]	VFG035715_gi:291281048_ (G2583_0236) hypothetical protein [ACE T6SS (CVF736)] [Escherichia coli O55:H7 str. CB9615]	VFG045926 (O3M_16610) fimbrial-like adhesin protein [E.coli laminin-binding fimbriae (ELF) (CVF824)] [Escherichia coli O104:H4 str. 2009EL-2050]	VFG045906 (O3M_16615) outer membrane usher protein [E.coli laminin-binding fimbriae (ELF) (CVF824)] [Escherichia coli O104:H4 str. 2009EL-2050]	VFG035722_gi:410484142_ (O3M_20335) type VI secretion system protein ImpG [ACE T6SS (CVF736)] [Escherichia coli O104:H4 str. 2009EL-2050]	VFG045950 (O3M_20925) major pilin subunit [Hemorrhagic E.coli pilus (HCP) (CVF825)] [Escherichia coli O104:H4 str. 2009EL-2050]	VFG045987 (O3M_20930) hypothetical protein [Hemorrhagic E.coli pilus (HCP) (CVF825)] [Escherichia coli O104:H4 str. 2009EL-2050]	VFG045875 (UMNK88_1093) major type 1 subunit fimbrin FimA [E.coli laminin-binding fimbriae (ELF) (CVF824)] [Escherichia coli UMNK88]	VFG045897 (UMNK88_1094) chaperone protein FocC [E.coli laminin-binding fimbriae (ELF) (CVF824)] [Escherichia coli UMNK88]	VFG045913 (UMNK88_1095) outer membrane usher protein FimD [E.coli laminin-binding fimbriae (ELF) (CVF824)] [Escherichia coli UMNK88]	VFG045933 (UMNK88_1096) hypothetical protein [E.coli laminin-binding fimbriae (ELF) (CVF824)] [Escherichia coli UMNK88]	VFG035729_gi:386612389_ (UMNK88_238) hypothetical protein [ACE T6SS (CVF736)] [Escherichia coli UMNK88]	VFG035710_gi:15799909_ (Z0260) hypothetical protein [EHS (SS185)] [Escherichia coli O157:H7 str. EDL933]
ECL19751	VFG046044 (APECO78_03970) type IV pilin biogenesis protein [Hemorrhagic E.coli pilus (HCP) (CVF825)] [Escherichia coli O78:H18 str. WS3294A]	VFG046007 (APECO78_03975) hypothetical protein [Hemorrhagic E.coli pilus (HCP) (CVF825)] [Escherichia coli O78:H18 str. WS3294A]	VFG045899 (APECO78_08685) periplasmic pilin chaperone [E.coli laminin-binding fimbriae (ELF) (CVF824)] [Escherichia coli O78:H18 str. WS3294A]	VFG045915 (APECO78_08690) outer membrane usher protein [E.coli laminin-binding fimbriae (ELF) (CVF824)] [Escherichia coli O78:H18 str. WS3294A]	VFG045935 (APECO78_08695) fimbrial-like adhesin protein [E.coli laminin-binding fimbriae (ELF) (CVF824)] [Escherichia coli O78:H18 str. WS3294A]	VFG045983 (CDCO157_0108) hypothetical protein [Hemorrhagic E.coli pilus (HCP) (CVF825)] [Escherichia coli O157:H7 str. Xuzhou21]	VFG045827 (EC958_1421) hemolysin E [Hemolysin/cytolysin A (CVF750)] [Escherichia coli O25b:H4-ST131]		VFG045826 (EC958_5138) Fluffing protein [Cah, AIDA-I type (CVF745)] [Escherichia coli O25b:H4-ST131]	VFG045862 (ECH74115_1100) fimbrial protein [E.coli laminin-binding fimbriae (ELF) (CVF824)] [Escherichia coli O157:H7 str. EC4115]	VFG045884 (ECH74115_1101) periplasmic pilus chaperone family protein [E.coli laminin-binding fimbriae (ELF) (CVF824)] [Escherichia coli O157:H7 str. EC4115]	VFG035720_gi:260842456_ (ECO103_0224) hypothetical protein [ACE T6SS (CVF736)] [Escherichia coli O103:H2 str. 12009]	VFG035721_gi:260866370_ (ECO111_0230) hypothetical protein [ACE T6SS (CVF736)] [Escherichia coli O111:H- str. 11128]	VFG045859 (ECO55CA74_05720) putative fimbrial-like adhesin protein [E.coli laminin-binding fimbriae (ELF) (CVF824)] [Escherichia coli O55:H7 str. RM12579]	VFG045881 (ECO55CA74_05725) chaperone [E.coli laminin-binding fimbriae (ELF) (CVF824)] [Escherichia coli O55:H7 str. RM12579]	VFG046031 (ECP_0106) type IV pilin biogenesis protein [Hemorrhagic E.coli pilus (HCP) (CVF825)] [Escherichia coli 536]	VFG045993 (ECP_0107) hypothetical protein [Hemorrhagic E.coli pilus (HCP) (CVF825)] [Escherichia coli 536]	VFG045956 (ECP_0108) major pilin subunit [Hemorrhagic E.coli pilus (HCP) (CVF825)] [Escherichia coli 536]	VFG043545_gi:218560235_ (ECS88_3547) lipoprotein NlpI [NlpI (AI331)] [Escherichia coli O45:K1:H7 str. S88]	VFG046082 (ECVR50_0238) hypothetical protein [ACE T6SS (CVF736)] [Escherichia coli VR50]	VFG046083 (ECVR50_0239) IcmF-related protein [ACE T6SS (CVF736)] [Escherichia coli VR50]	VFG046084 (ECVR50_0240) uncharacterized protein ImpA [ACE T6SS (CVF736)] [Escherichia coli VR50]	VFG046086 (ECVR50_0242) putative protease [ACE T6SS (CVF736)] [Escherichia coli VR50]	VFG046090 (ECVR50_0246) hypothetical protein [ACE T6SS (CVF736)] [Escherichia coli VR50]	VFG046091 (ECVR50_0247) hypothetical protein [ACE T6SS (CVF736)] [Escherichia coli VR50]	VFG046092 (ECVR50_0248) hypothetical protein [ACE T6SS (CVF736)] [Escherichia coli VR50]	VFG046093 (ECVR50_0249) hypothetical protein [ACE T6SS (CVF736)] [Escherichia coli VR50]	VFG046094 (ECVR50_0250) uncharacterized protein ImpC [ACE T6SS (CVF736)] [Escherichia coli VR50]	VFG046096 (ECVR50_0257) hypothetical protein [ACE T6SS (CVF736)] [Escherichia coli VR50]	VFG035711_gi:15829483_ (ECs0229) hypothetical protein [ACE T6SS (CVF736)] [Escherichia coli O157:H7 str. Sakai]	VFG042095_gi:15832966_ (ECs3712) hypothetical protein [ETT2 (SS017)] [Escherichia coli O157:H7 str. Sakai]	VFG046001 (ETEC_0103) protein transport protein HofB [Hemorrhagic E.coli pilus (HCP) (CVF825)] [Escherichia coli O78:H11:K80 str. H10407]	VFG045896 (ETEC_1007) periplasmic pilin chaperone [E.coli laminin-binding fimbriae (ELF) (CVF824)] [Escherichia coli O78:H11:K80 str. H10407]	VFG045912 (ETEC_1008) fimbrial outer membrane usher protein [E.coli laminin-binding fimbriae (ELF) (CVF824)] [Escherichia coli O78:H11:K80 str. H10407]	VFG045932 (ETEC_1011) fimbrial precursor [E.coli laminin-binding fimbriae (ELF) (CVF824)] [Escherichia coli O78:H11:K80 str. H10407]	VFG035728_gi:157155723_ (EcE24377A_0237) hypothetical protein [ACE T6SS (CVF736)] [Escherichia coli E24377A]	VFG045931 (EcE24377A_1056) fimbrial protein [E.coli laminin-binding fimbriae (ELF) (CVF824)] [Escherichia coli E24377A]	VFG035715_gi:291281048_ (G2583_0236) hypothetical protein [ACE T6SS (CVF736)] [Escherichia coli O55:H7 str. CB9615]	VFG045926 (O3M_16610) fimbrial-like adhesin protein [E.coli laminin-binding fimbriae (ELF) (CVF824)] [Escherichia coli O104:H4 str. 2009EL-2050]	VFG045906 (O3M_16615) outer membrane usher protein [E.coli laminin-binding fimbriae (ELF) (CVF824)] [Escherichia coli O104:H4 str. 2009EL-2050]	VFG035722_gi:410484142_ (O3M_20335) type VI secretion system protein ImpG [ACE T6SS (CVF736)] [Escherichia coli O104:H4 str. 2009EL-2050]	VFG045950 (O3M_20925) major pilin subunit [Hemorrhagic E.coli pilus (HCP) (CVF825)] [Escherichia coli O104:H4 str. 2009EL-2050]	VFG045987 (O3M_20930) hypothetical protein [Hemorrhagic E.coli pilus (HCP) (CVF825)] [Escherichia coli O104:H4 str. 2009EL-2050]	VFG045875 (UMNK88_1093) major type 1 subunit fimbrin FimA [E.coli laminin-binding fimbriae (ELF) (CVF824)] [Escherichia coli UMNK88]	VFG045897 (UMNK88_1094) chaperone protein FocC [E.coli laminin-binding fimbriae (ELF) (CVF824)] [Escherichia coli UMNK88]	VFG045913 (UMNK88_1095) outer membrane usher protein FimD [E.coli laminin-binding fimbriae (ELF) (CVF824)] [Escherichia coli UMNK88]	VFG045933 (UMNK88_1096) hypothetical protein [E.coli laminin-binding fimbriae (ELF) (CVF824)] [Escherichia coli UMNK88]	VFG035729_gi:386612389_ (UMNK88_238) hypothetical protein [ACE T6SS (CVF736)] [Escherichia coli UMNK88]	VFG035710_gi:15799909_ (Z0260) hypothetical protein [EHS (SS185)] [Escherichia coli O157:H7 str. EDL933]
ECL19755	VFG046044 (APECO78_03970) type IV pilin biogenesis protein [Hemorrhagic E.coli pilus (HCP) (CVF825)] [Escherichia coli O78:H18 str. WS3294A]	VFG046007 (APECO78_03975) hypothetical protein [Hemorrhagic E.coli pilus (HCP) (CVF825)] [Escherichia coli O78:H18 str. WS3294A]	VFG045899 (APECO78_08685) periplasmic pilin chaperone [E.coli laminin-binding fimbriae (ELF) (CVF824)] [Escherichia coli O78:H18 str. WS3294A]	VFG045915 (APECO78_08690) outer membrane usher protein [E.coli laminin-binding fimbriae (ELF) (CVF824)] [Escherichia coli O78:H18 str. WS3294A]	VFG045935 (APECO78_08695) fimbrial-like adhesin protein [E.coli laminin-binding fimbriae (ELF) (CVF824)] [Escherichia coli O78:H18 str. WS3294A]	VFG045983 (CDCO157_0108) hypothetical protein [Hemorrhagic E.coli pilus (HCP) (CVF825)] [Escherichia coli O157:H7 str. Xuzhou21]	VFG045827 (EC958_1421) hemolysin E [Hemolysin/cytolysin A (CVF750)] [Escherichia coli O25b:H4-ST131]			VFG045862 (ECH74115_1100) fimbrial protein [E.coli laminin-binding fimbriae (ELF) (CVF824)] [Escherichia coli O157:H7 str. EC4115]	VFG045884 (ECH74115_1101) periplasmic pilus chaperone family protein [E.coli laminin-binding fimbriae (ELF) (CVF824)] [Escherichia coli O157:H7 str. EC4115]	VFG035720_gi:260842456_ (ECO103_0224) hypothetical protein [ACE T6SS (CVF736)] [Escherichia coli O103:H2 str. 12009]	VFG035721_gi:260866370_ (ECO111_0230) hypothetical protein [ACE T6SS (CVF736)] [Escherichia coli O111:H- str. 11128]	VFG045859 (ECO55CA74_05720) putative fimbrial-like adhesin protein [E.coli laminin-binding fimbriae (ELF) (CVF824)] [Escherichia coli O55:H7 str. RM12579]	VFG045881 (ECO55CA74_05725) chaperone [E.coli laminin-binding fimbriae (ELF) (CVF824)] [Escherichia coli O55:H7 str. RM12579]	VFG046031 (ECP_0106) type IV pilin biogenesis protein [Hemorrhagic E.coli pilus (HCP) (CVF825)] [Escherichia coli 536]	VFG045993 (ECP_0107) hypothetical protein [Hemorrhagic E.coli pilus (HCP) (CVF825)] [Escherichia coli 536]	VFG045956 (ECP_0108) major pilin subunit [Hemorrhagic E.coli pilus (HCP) (CVF825)] [Escherichia coli 536]	VFG043545_gi:218560235_ (ECS88_3547) lipoprotein NlpI [NlpI (AI331)] [Escherichia coli O45:K1:H7 str. S88]	VFG046082 (ECVR50_0238) hypothetical protein [ACE T6SS (CVF736)] [Escherichia coli VR50]	VFG046083 (ECVR50_0239) IcmF-related protein [ACE T6SS (CVF736)] [Escherichia coli VR50]	VFG046084 (ECVR50_0240) uncharacterized protein ImpA [ACE T6SS (CVF736)] [Escherichia coli VR50]	VFG046086 (ECVR50_0242) putative protease [ACE T6SS (CVF736)] [Escherichia coli VR50]	VFG046090 (ECVR50_0246) hypothetical protein [ACE T6SS (CVF736)] [Escherichia coli VR50]	VFG046091 (ECVR50_0247) hypothetical protein [ACE T6SS (CVF736)] [Escherichia coli VR50]	VFG046092 (ECVR50_0248) hypothetical protein [ACE T6SS (CVF736)] [Escherichia coli VR50]	VFG046093 (ECVR50_0249) hypothetical protein [ACE T6SS (CVF736)] [Escherichia coli VR50]	VFG046094 (ECVR50_0250) uncharacterized protein ImpC [ACE T6SS (CVF736)] [Escherichia coli VR50]	VFG046096 (ECVR50_0257) hypothetical protein [ACE T6SS (CVF736)] [Escherichia coli VR50]	VFG035711_gi:15829483_ (ECs0229) hypothetical protein [ACE T6SS (CVF736)] [Escherichia coli O157:H7 str. Sakai]	VFG042095_gi:15832966_ (ECs3712) hypothetical protein [ETT2 (SS017)] [Escherichia coli O157:H7 str. Sakai]	VFG046001 (ETEC_0103) protein transport protein HofB [Hemorrhagic E.coli pilus (HCP) (CVF825)] [Escherichia coli O78:H11:K80 str. H10407]	VFG045896 (ETEC_1007) periplasmic pilin chaperone [E.coli laminin-binding fimbriae (ELF) (CVF824)] [Escherichia coli O78:H11:K80 str. H10407]	VFG045912 (ETEC_1008) fimbrial outer membrane usher protein [E.coli laminin-binding fimbriae (ELF) (CVF824)] [Escherichia coli O78:H11:K80 str. H10407]	VFG045932 (ETEC_1011) fimbrial precursor [E.coli laminin-binding fimbriae (ELF) (CVF824)] [Escherichia coli O78:H11:K80 str. H10407]	VFG035728_gi:157155723_ (EcE24377A_0237) hypothetical protein [ACE T6SS (CVF736)] [Escherichia coli E24377A]	VFG045931 (EcE24377A_1056) fimbrial protein [E.coli laminin-binding fimbriae (ELF) (CVF824)] [Escherichia coli E24377A]	VFG035715_gi:291281048_ (G2583_0236) hypothetical protein [ACE T6SS (CVF736)] [Escherichia coli O55:H7 str. CB9615]	VFG045926 (O3M_16610) fimbrial-like adhesin protein [E.coli laminin-binding fimbriae (ELF) (CVF824)] [Escherichia coli O104:H4 str. 2009EL-2050]	VFG045906 (O3M_16615) outer membrane usher protein [E.coli laminin-binding fimbriae (ELF) (CVF824)] [Escherichia coli O104:H4 str. 2009EL-2050]	VFG035722_gi:410484142_ (O3M_20335) type VI secretion system protein ImpG [ACE T6SS (CVF736)] [Escherichia coli O104:H4 str. 2009EL-2050]	VFG045950 (O3M_20925) major pilin subunit [Hemorrhagic E.coli pilus (HCP) (CVF825)] [Escherichia coli O104:H4 str. 2009EL-2050]	VFG045987 (O3M_20930) hypothetical protein [Hemorrhagic E.coli pilus (HCP) (CVF825)] [Escherichia coli O104:H4 str. 2009EL-2050]	VFG045875 (UMNK88_1093) major type 1 subunit fimbrin FimA [E.coli laminin-binding fimbriae (ELF) (CVF824)] [Escherichia coli UMNK88]	VFG045897 (UMNK88_1094) chaperone protein FocC [E.coli laminin-binding fimbriae (ELF) (CVF824)] [Escherichia coli UMNK88]	VFG045913 (UMNK88_1095) outer membrane usher protein FimD [E.coli laminin-binding fimbriae (ELF) (CVF824)] [Escherichia coli UMNK88]	VFG045933 (UMNK88_1096) hypothetical protein [E.coli laminin-binding fimbriae (ELF) (CVF824)] [Escherichia coli UMNK88]	VFG035729_gi:386612389_ (UMNK88_238) hypothetical protein [ACE T6SS (CVF736)] [Escherichia coli UMNK88]	VFG035710_gi:15799909_ (Z0260) hypothetical protein [EHS (SS185)] [Escherichia coli O157:H7 str. EDL933]
ECL19763	VFG046044 (APECO78_03970) type IV pilin biogenesis protein [Hemorrhagic E.coli pilus (HCP) (CVF825)] [Escherichia coli O78:H18 str. WS3294A]	VFG046007 (APECO78_03975) hypothetical protein [Hemorrhagic E.coli pilus (HCP) (CVF825)] [Escherichia coli O78:H18 str. WS3294A]	VFG045899 (APECO78_08685) periplasmic pilin chaperone [E.coli laminin-binding fimbriae (ELF) (CVF824)] [Escherichia coli O78:H18 str. WS3294A]	VFG045915 (APECO78_08690) outer membrane usher protein [E.coli laminin-binding fimbriae (ELF) (CVF824)] [Escherichia coli O78:H18 str. WS3294A]	VFG045935 (APECO78_08695) fimbrial-like adhesin protein [E.coli laminin-binding fimbriae (ELF) (CVF824)] [Escherichia coli O78:H18 str. WS3294A]	VFG045983 (CDCO157_0108) hypothetical protein [Hemorrhagic E.coli pilus (HCP) (CVF825)] [Escherichia coli O157:H7 str. Xuzhou21]	VFG045827 (EC958_1421) hemolysin E [Hemolysin/cytolysin A (CVF750)] [Escherichia coli O25b:H4-ST131]		VFG045826 (EC958_5138) Fluffing protein [Cah, AIDA-I type (CVF745)] [Escherichia coli O25b:H4-ST131]	VFG045862 (ECH74115_1100) fimbrial protein [E.coli laminin-binding fimbriae (ELF) (CVF824)] [Escherichia coli O157:H7 str. EC4115]	VFG045884 (ECH74115_1101) periplasmic pilus chaperone family protein [E.coli laminin-binding fimbriae (ELF) (CVF824)] [Escherichia coli O157:H7 str. EC4115]	VFG035720_gi:260842456_ (ECO103_0224) hypothetical protein [ACE T6SS (CVF736)] [Escherichia coli O103:H2 str. 12009]	VFG035721_gi:260866370_ (ECO111_0230) hypothetical protein [ACE T6SS (CVF736)] [Escherichia coli O111:H- str. 11128]	VFG045859 (ECO55CA74_05720) putative fimbrial-like adhesin protein [E.coli laminin-binding fimbriae (ELF) (CVF824)] [Escherichia coli O55:H7 str. RM12579]	VFG045881 (ECO55CA74_05725) chaperone [E.coli laminin-binding fimbriae (ELF) (CVF824)] [Escherichia coli O55:H7 str. RM12579]	VFG046031 (ECP_0106) type IV pilin biogenesis protein [Hemorrhagic E.coli pilus (HCP) (CVF825)] [Escherichia coli 536]	VFG045993 (ECP_0107) hypothetical protein [Hemorrhagic E.coli pilus (HCP) (CVF825)] [Escherichia coli 536]	VFG045956 (ECP_0108) major pilin subunit [Hemorrhagic E.coli pilus (HCP) (CVF825)] [Escherichia coli 536]	VFG043545_gi:218560235_ (ECS88_3547) lipoprotein NlpI [NlpI (AI331)] [Escherichia coli O45:K1:H7 str. S88]	VFG046082 (ECVR50_0238) hypothetical protein [ACE T6SS (CVF736)] [Escherichia coli VR50]	VFG046083 (ECVR50_0239) IcmF-related protein [ACE T6SS (CVF736)] [Escherichia coli VR50]	VFG046084 (ECVR50_0240) uncharacterized protein ImpA [ACE T6SS (CVF736)] [Escherichia coli VR50]	VFG046086 (ECVR50_0242) putative protease [ACE T6SS (CVF736)] [Escherichia coli VR50]	VFG046090 (ECVR50_0246) hypothetical protein [ACE T6SS (CVF736)] [Escherichia coli VR50]	VFG046091 (ECVR50_0247) hypothetical protein [ACE T6SS (CVF736)] [Escherichia coli VR50]	VFG046092 (ECVR50_0248) hypothetical protein [ACE T6SS (CVF736)] [Escherichia coli VR50]	VFG046093 (ECVR50_0249) hypothetical protein [ACE T6SS (CVF736)] [Escherichia coli VR50]	VFG046094 (ECVR50_0250) uncharacterized protein ImpC [ACE T6SS (CVF736)] [Escherichia coli VR50]	VFG046096 (ECVR50_0257) hypothetical protein [ACE T6SS (CVF736)] [Escherichia coli VR50]	VFG035711_gi:15829483_ (ECs0229) hypothetical protein [ACE T6SS (CVF736)] [Escherichia coli O157:H7 str. Sakai]	VFG042095_gi:15832966_ (ECs3712) hypothetical protein [ETT2 (SS017)] [Escherichia coli O157:H7 str. Sakai]	VFG046001 (ETEC_0103) protein transport protein HofB [Hemorrhagic E.coli pilus (HCP) (CVF825)] [Escherichia coli O78:H11:K80 str. H10407]	VFG045896 (ETEC_1007) periplasmic pilin chaperone [E.coli laminin-binding fimbriae (ELF) (CVF824)] [Escherichia coli O78:H11:K80 str. H10407]	VFG045912 (ETEC_1008) fimbrial outer membrane usher protein [E.coli laminin-binding fimbriae (ELF) (CVF824)] [Escherichia coli O78:H11:K80 str. H10407]	VFG045932 (ETEC_1011) fimbrial precursor [E.coli laminin-binding fimbriae (ELF) (CVF824)] [Escherichia coli O78:H11:K80 str. H10407]	VFG035728_gi:157155723_ (EcE24377A_0237) hypothetical protein [ACE T6SS (CVF736)] [Escherichia coli E24377A]	VFG045931 (EcE24377A_1056) fimbrial protein [E.coli laminin-binding fimbriae (ELF) (CVF824)] [Escherichia coli E24377A]	VFG035715_gi:291281048_ (G2583_0236) hypothetical protein [ACE T6SS (CVF736)] [Escherichia coli O55:H7 str. CB9615]	VFG045926 (O3M_16610) fimbrial-like adhesin protein [E.coli laminin-binding fimbriae (ELF) (CVF824)] [Escherichia coli O104:H4 str. 2009EL-2050]	VFG045906 (O3M_16615) outer membrane usher protein [E.coli laminin-binding fimbriae (ELF) (CVF824)] [Escherichia coli O104:H4 str. 2009EL-2050]	VFG035722_gi:410484142_ (O3M_20335) type VI secretion system protein ImpG [ACE T6SS (CVF736)] [Escherichia coli O104:H4 str. 2009EL-2050]	VFG045950 (O3M_20925) major pilin subunit [Hemorrhagic E.coli pilus (HCP) (CVF825)] [Escherichia coli O104:H4 str. 2009EL-2050]	VFG045987 (O3M_20930) hypothetical protein [Hemorrhagic E.coli pilus (HCP) (CVF825)] [Escherichia coli O104:H4 str. 2009EL-2050]	VFG045875 (UMNK88_1093) major type 1 subunit fimbrin FimA [E.coli laminin-binding fimbriae (ELF) (CVF824)] [Escherichia coli UMNK88]	VFG045897 (UMNK88_1094) chaperone protein FocC [E.coli laminin-binding fimbriae (ELF) (CVF824)] [Escherichia coli UMNK88]	VFG045913 (UMNK88_1095) outer membrane usher protein FimD [E.coli laminin-binding fimbriae (ELF) (CVF824)] [Escherichia coli UMNK88]	VFG045933 (UMNK88_1096) hypothetical protein [E.coli laminin-binding fimbriae (ELF) (CVF824)] [Escherichia coli UMNK88]	VFG035729_gi:386612389_ (UMNK88_238) hypothetical protein [ACE T6SS (CVF736)] [Escherichia coli UMNK88]	VFG035710_gi:15799909_ (Z0260) hypothetical protein [EHS (SS185)] [Escherichia coli O157:H7 str. EDL933]
ECL19788	VFG046044 (APECO78_03970) type IV pilin biogenesis protein [Hemorrhagic E.coli pilus (HCP) (CVF825)] [Escherichia coli O78:H18 str. WS3294A]	VFG046007 (APECO78_03975) hypothetical protein [Hemorrhagic E.coli pilus (HCP) (CVF825)] [Escherichia coli O78:H18 str. WS3294A]	VFG045899 (APECO78_08685) periplasmic pilin chaperone [E.coli laminin-binding fimbriae (ELF) (CVF824)] [Escherichia coli O78:H18 str. WS3294A]	VFG045915 (APECO78_08690) outer membrane usher protein [E.coli laminin-binding fimbriae (ELF) (CVF824)] [Escherichia coli O78:H18 str. WS3294A]	VFG045935 (APECO78_08695) fimbrial-like adhesin protein [E.coli laminin-binding fimbriae (ELF) (CVF824)] [Escherichia coli O78:H18 str. WS3294A]	VFG045983 (CDCO157_0108) hypothetical protein [Hemorrhagic E.coli pilus (HCP) (CVF825)] [Escherichia coli O157:H7 str. Xuzhou21]	VFG045827 (EC958_1421) hemolysin E [Hemolysin/cytolysin A (CVF750)] [Escherichia coli O25b:H4-ST131]				VFG045884 (ECH74115_1101) periplasmic pilus chaperone family protein [E.coli laminin-binding fimbriae (ELF) (CVF824)] [Escherichia coli O157:H7 str. EC4115]				VFG045881 (ECO55CA74_05725) chaperone [E.coli laminin-binding fimbriae (ELF) (CVF824)] [Escherichia coli O55:H7 str. RM12579]	VFG046031 (ECP_0106) type IV pilin biogenesis protein [Hemorrhagic E.coli pilus (HCP) (CVF825)] [Escherichia coli 536]	VFG045993 (ECP_0107) hypothetical protein [Hemorrhagic E.coli pilus (HCP) (CVF825)] [Escherichia coli 536]	VFG045956 (ECP_0108) major pilin subunit [Hemorrhagic E.coli pilus (HCP) (CVF825)] [Escherichia coli 536]	VFG043545_gi:218560235_ (ECS88_3547) lipoprotein NlpI [NlpI (AI331)] [Escherichia coli O45:K1:H7 str. S88]												VFG042095_gi:15832966_ (ECs3712) hypothetical protein [ETT2 (SS017)] [Escherichia coli O157:H7 str. Sakai]	VFG046001 (ETEC_0103) protein transport protein HofB [Hemorrhagic E.coli pilus (HCP) (CVF825)] [Escherichia coli O78:H11:K80 str. H10407]	VFG045896 (ETEC_1007) periplasmic pilin chaperone [E.coli laminin-binding fimbriae (ELF) (CVF824)] [Escherichia coli O78:H11:K80 str. H10407]	VFG045912 (ETEC_1008) fimbrial outer membrane usher protein [E.coli laminin-binding fimbriae (ELF) (CVF824)] [Escherichia coli O78:H11:K80 str. H10407]	VFG045932 (ETEC_1011) fimbrial precursor [E.coli laminin-binding fimbriae (ELF) (CVF824)] [Escherichia coli O78:H11:K80 str. H10407]		VFG045931 (EcE24377A_1056) fimbrial protein [E.coli laminin-binding fimbriae (ELF) (CVF824)] [Escherichia coli E24377A]		VFG045926 (O3M_16610) fimbrial-like adhesin protein [E.coli laminin-binding fimbriae (ELF) (CVF824)] [Escherichia coli O104:H4 str. 2009EL-2050]	VFG045906 (O3M_16615) outer membrane usher protein [E.coli laminin-binding fimbriae (ELF) (CVF824)] [Escherichia coli O104:H4 str. 2009EL-2050]		VFG045950 (O3M_20925) major pilin subunit [Hemorrhagic E.coli pilus (HCP) (CVF825)] [Escherichia coli O104:H4 str. 2009EL-2050]	VFG045987 (O3M_20930) hypothetical protein [Hemorrhagic E.coli pilus (HCP) (CVF825)] [Escherichia coli O104:H4 str. 2009EL-2050]		VFG045897 (UMNK88_1094) chaperone protein FocC [E.coli laminin-binding fimbriae (ELF) (CVF824)] [Escherichia coli UMNK88]	VFG045913 (UMNK88_1095) outer membrane usher protein FimD [E.coli laminin-binding fimbriae (ELF) (CVF824)] [Escherichia coli UMNK88]	VFG045933 (UMNK88_1096) hypothetical protein [E.coli laminin-binding fimbriae (ELF) (CVF824)] [Escherichia coli UMNK88]
ECL19820	VFG046044 (APECO78_03970) type IV pilin biogenesis protein [Hemorrhagic E.coli pilus (HCP) (CVF825)] [Escherichia coli O78:H18 str. WS3294A]	VFG046007 (APECO78_03975) hypothetical protein [Hemorrhagic E.coli pilus (HCP) (CVF825)] [Escherichia coli O78:H18 str. WS3294A]	VFG045899 (APECO78_08685) periplasmic pilin chaperone [E.coli laminin-binding fimbriae (ELF) (CVF824)] [Escherichia coli O78:H18 str. WS3294A]	VFG045915 (APECO78_08690) outer membrane usher protein [E.coli laminin-binding fimbriae (ELF) (CVF824)] [Escherichia coli O78:H18 str. WS3294A]	VFG045935 (APECO78_08695) fimbrial-like adhesin protein [E.coli laminin-binding fimbriae (ELF) (CVF824)] [Escherichia coli O78:H18 str. WS3294A]	VFG045983 (CDCO157_0108) hypothetical protein [Hemorrhagic E.coli pilus (HCP) (CVF825)] [Escherichia coli O157:H7 str. Xuzhou21]	VFG045827 (EC958_1421) hemolysin E [Hemolysin/cytolysin A (CVF750)] [Escherichia coli O25b:H4-ST131]				VFG045884 (ECH74115_1101) periplasmic pilus chaperone family protein [E.coli laminin-binding fimbriae (ELF) (CVF824)] [Escherichia coli O157:H7 str. EC4115]				VFG045881 (ECO55CA74_05725) chaperone [E.coli laminin-binding fimbriae (ELF) (CVF824)] [Escherichia coli O55:H7 str. RM12579]	VFG046031 (ECP_0106) type IV pilin biogenesis protein [Hemorrhagic E.coli pilus (HCP) (CVF825)] [Escherichia coli 536]	VFG045993 (ECP_0107) hypothetical protein [Hemorrhagic E.coli pilus (HCP) (CVF825)] [Escherichia coli 536]	VFG045956 (ECP_0108) major pilin subunit [Hemorrhagic E.coli pilus (HCP) (CVF825)] [Escherichia coli 536]	VFG043545_gi:218560235_ (ECS88_3547) lipoprotein NlpI [NlpI (AI331)] [Escherichia coli O45:K1:H7 str. S88]												VFG042095_gi:15832966_ (ECs3712) hypothetical protein [ETT2 (SS017)] [Escherichia coli O157:H7 str. Sakai]	VFG046001 (ETEC_0103) protein transport protein HofB [Hemorrhagic E.coli pilus (HCP) (CVF825)] [Escherichia coli O78:H11:K80 str. H10407]	VFG045896 (ETEC_1007) periplasmic pilin chaperone [E.coli laminin-binding fimbriae (ELF) (CVF824)] [Escherichia coli O78:H11:K80 str. H10407]	VFG045912 (ETEC_1008) fimbrial outer membrane usher protein [E.coli laminin-binding fimbriae (ELF) (CVF824)] [Escherichia coli O78:H11:K80 str. H10407]	VFG045932 (ETEC_1011) fimbrial precursor [E.coli laminin-binding fimbriae (ELF) (CVF824)] [Escherichia coli O78:H11:K80 str. H10407]		VFG045931 (EcE24377A_1056) fimbrial protein [E.coli laminin-binding fimbriae (ELF) (CVF824)] [Escherichia coli E24377A]		VFG045926 (O3M_16610) fimbrial-like adhesin protein [E.coli laminin-binding fimbriae (ELF) (CVF824)] [Escherichia coli O104:H4 str. 2009EL-2050]	VFG045906 (O3M_16615) outer membrane usher protein [E.coli laminin-binding fimbriae (ELF) (CVF824)] [Escherichia coli O104:H4 str. 2009EL-2050]		VFG045950 (O3M_20925) major pilin subunit [Hemorrhagic E.coli pilus (HCP) (CVF825)] [Escherichia coli O104:H4 str. 2009EL-2050]	VFG045987 (O3M_20930) hypothetical protein [Hemorrhagic E.coli pilus (HCP) (CVF825)] [Escherichia coli O104:H4 str. 2009EL-2050]		VFG045897 (UMNK88_1094) chaperone protein FocC [E.coli laminin-binding fimbriae (ELF) (CVF824)] [Escherichia coli UMNK88]	VFG045913 (UMNK88_1095) outer membrane usher protein FimD [E.coli laminin-binding fimbriae (ELF) (CVF824)] [Escherichia coli UMNK88]	VFG045933 (UMNK88_1096) hypothetical protein [E.coli laminin-binding fimbriae (ELF) (CVF824)] [Escherichia coli UMNK88]
ECL19885	VFG046044 (APECO78_03970) type IV pilin biogenesis protein [Hemorrhagic E.coli pilus (HCP) (CVF825)] [Escherichia coli O78:H18 str. WS3294A]	VFG046007 (APECO78_03975) hypothetical protein [Hemorrhagic E.coli pilus (HCP) (CVF825)] [Escherichia coli O78:H18 str. WS3294A]	VFG045899 (APECO78_08685) periplasmic pilin chaperone [E.coli laminin-binding fimbriae (ELF) (CVF824)] [Escherichia coli O78:H18 str. WS3294A]	VFG045915 (APECO78_08690) outer membrane usher protein [E.coli laminin-binding fimbriae (ELF) (CVF824)] [Escherichia coli O78:H18 str. WS3294A]	VFG045935 (APECO78_08695) fimbrial-like adhesin protein [E.coli laminin-binding fimbriae (ELF) (CVF824)] [Escherichia coli O78:H18 str. WS3294A]	VFG045983 (CDCO157_0108) hypothetical protein [Hemorrhagic E.coli pilus (HCP) (CVF825)] [Escherichia coli O157:H7 str. Xuzhou21]	VFG045827 (EC958_1421) hemolysin E [Hemolysin/cytolysin A (CVF750)] [Escherichia coli O25b:H4-ST131]		VFG045826 (EC958_5138) Fluffing protein [Cah, AIDA-I type (CVF745)] [Escherichia coli O25b:H4-ST131]	VFG045862 (ECH74115_1100) fimbrial protein [E.coli laminin-binding fimbriae (ELF) (CVF824)] [Escherichia coli O157:H7 str. EC4115]	VFG045884 (ECH74115_1101) periplasmic pilus chaperone family protein [E.coli laminin-binding fimbriae (ELF) (CVF824)] [Escherichia coli O157:H7 str. EC4115]	VFG035720_gi:260842456_ (ECO103_0224) hypothetical protein [ACE T6SS (CVF736)] [Escherichia coli O103:H2 str. 12009]	VFG035721_gi:260866370_ (ECO111_0230) hypothetical protein [ACE T6SS (CVF736)] [Escherichia coli O111:H- str. 11128]	VFG045859 (ECO55CA74_05720) putative fimbrial-like adhesin protein [E.coli laminin-binding fimbriae (ELF) (CVF824)] [Escherichia coli O55:H7 str. RM12579]	VFG045881 (ECO55CA74_05725) chaperone [E.coli laminin-binding fimbriae (ELF) (CVF824)] [Escherichia coli O55:H7 str. RM12579]	VFG046031 (ECP_0106) type IV pilin biogenesis protein [Hemorrhagic E.coli pilus (HCP) (CVF825)] [Escherichia coli 536]	VFG045993 (ECP_0107) hypothetical protein [Hemorrhagic E.coli pilus (HCP) (CVF825)] [Escherichia coli 536]	VFG045956 (ECP_0108) major pilin subunit [Hemorrhagic E.coli pilus (HCP) (CVF825)] [Escherichia coli 536]	VFG043545_gi:218560235_ (ECS88_3547) lipoprotein NlpI [NlpI (AI331)] [Escherichia coli O45:K1:H7 str. S88]	VFG046082 (ECVR50_0238) hypothetical protein [ACE T6SS (CVF736)] [Escherichia coli VR50]	VFG046083 (ECVR50_0239) IcmF-related protein [ACE T6SS (CVF736)] [Escherichia coli VR50]	VFG046084 (ECVR50_0240) uncharacterized protein ImpA [ACE T6SS (CVF736)] [Escherichia coli VR50]	VFG046086 (ECVR50_0242) putative protease [ACE T6SS (CVF736)] [Escherichia coli VR50]	VFG046090 (ECVR50_0246) hypothetical protein [ACE T6SS (CVF736)] [Escherichia coli VR50]	VFG046091 (ECVR50_0247) hypothetical protein [ACE T6SS (CVF736)] [Escherichia coli VR50]	VFG046092 (ECVR50_0248) hypothetical protein [ACE T6SS (CVF736)] [Escherichia coli VR50]	VFG046093 (ECVR50_0249) hypothetical protein [ACE T6SS (CVF736)] [Escherichia coli VR50]	VFG046094 (ECVR50_0250) uncharacterized protein ImpC [ACE T6SS (CVF736)] [Escherichia coli VR50]	VFG046096 (ECVR50_0257) hypothetical protein [ACE T6SS (CVF736)] [Escherichia coli VR50]	VFG035711_gi:15829483_ (ECs0229) hypothetical protein [ACE T6SS (CVF736)] [Escherichia coli O157:H7 str. Sakai]	VFG042095_gi:15832966_ (ECs3712) hypothetical protein [ETT2 (SS017)] [Escherichia coli O157:H7 str. Sakai]	VFG046001 (ETEC_0103) protein transport protein HofB [Hemorrhagic E.coli pilus (HCP) (CVF825)] [Escherichia coli O78:H11:K80 str. H10407]	VFG045896 (ETEC_1007) periplasmic pilin chaperone [E.coli laminin-binding fimbriae (ELF) (CVF824)] [Escherichia coli O78:H11:K80 str. H10407]	VFG045912 (ETEC_1008) fimbrial outer membrane usher protein [E.coli laminin-binding fimbriae (ELF) (CVF824)] [Escherichia coli O78:H11:K80 str. H10407]	VFG045932 (ETEC_1011) fimbrial precursor [E.coli laminin-binding fimbriae (ELF) (CVF824)] [Escherichia coli O78:H11:K80 str. H10407]	VFG035728_gi:157155723_ (EcE24377A_0237) hypothetical protein [ACE T6SS (CVF736)] [Escherichia coli E24377A]	VFG045931 (EcE24377A_1056) fimbrial protein [E.coli laminin-binding fimbriae (ELF) (CVF824)] [Escherichia coli E24377A]	VFG035715_gi:291281048_ (G2583_0236) hypothetical protein [ACE T6SS (CVF736)] [Escherichia coli O55:H7 str. CB9615]	VFG045926 (O3M_16610) fimbrial-like adhesin protein [E.coli laminin-binding fimbriae (ELF) (CVF824)] [Escherichia coli O104:H4 str. 2009EL-2050]	VFG045906 (O3M_16615) outer membrane usher protein [E.coli laminin-binding fimbriae (ELF) (CVF824)] [Escherichia coli O104:H4 str. 2009EL-2050]	VFG035722_gi:410484142_ (O3M_20335) type VI secretion system protein ImpG [ACE T6SS (CVF736)] [Escherichia coli O104:H4 str. 2009EL-2050]	VFG045950 (O3M_20925) major pilin subunit [Hemorrhagic E.coli pilus (HCP) (CVF825)] [Escherichia coli O104:H4 str. 2009EL-2050]	VFG045987 (O3M_20930) hypothetical protein [Hemorrhagic E.coli pilus (HCP) (CVF825)] [Escherichia coli O104:H4 str. 2009EL-2050]	VFG045875 (UMNK88_1093) major type 1 subunit fimbrin FimA [E.coli laminin-binding fimbriae (ELF) (CVF824)] [Escherichia coli UMNK88]	VFG045897 (UMNK88_1094) chaperone protein FocC [E.coli laminin-binding fimbriae (ELF) (CVF824)] [Escherichia coli UMNK88]	VFG045913 (UMNK88_1095) outer membrane usher protein FimD [E.coli laminin-binding fimbriae (ELF) (CVF824)] [Escherichia coli UMNK88]	VFG045933 (UMNK88_1096) hypothetical protein [E.coli laminin-binding fimbriae (ELF) (CVF824)] [Escherichia coli UMNK88]	VFG035729_gi:386612389_ (UMNK88_238) hypothetical protein [ACE T6SS (CVF736)] [Escherichia coli UMNK88]	VFG035710_gi:15799909_ (Z0260) hypothetical protein [EHS (SS185)] [Escherichia coli O157:H7 str. EDL933]
ECL19889	VFG046044 (APECO78_03970) type IV pilin biogenesis protein [Hemorrhagic E.coli pilus (HCP) (CVF825)] [Escherichia coli O78:H18 str. WS3294A]	VFG046007 (APECO78_03975) hypothetical protein [Hemorrhagic E.coli pilus (HCP) (CVF825)] [Escherichia coli O78:H18 str. WS3294A]	VFG045899 (APECO78_08685) periplasmic pilin chaperone [E.coli laminin-binding fimbriae (ELF) (CVF824)] [Escherichia coli O78:H18 str. WS3294A]	VFG045915 (APECO78_08690) outer membrane usher protein [E.coli laminin-binding fimbriae (ELF) (CVF824)] [Escherichia coli O78:H18 str. WS3294A]	VFG045935 (APECO78_08695) fimbrial-like adhesin protein [E.coli laminin-binding fimbriae (ELF) (CVF824)] [Escherichia coli O78:H18 str. WS3294A]	VFG045983 (CDCO157_0108) hypothetical protein [Hemorrhagic E.coli pilus (HCP) (CVF825)] [Escherichia coli O157:H7 str. Xuzhou21]	VFG045827 (EC958_1421) hemolysin E [Hemolysin/cytolysin A (CVF750)] [Escherichia coli O25b:H4-ST131]		VFG045826 (EC958_5138) Fluffing protein [Cah, AIDA-I type (CVF745)] [Escherichia coli O25b:H4-ST131]	VFG045862 (ECH74115_1100) fimbrial protein [E.coli laminin-binding fimbriae (ELF) (CVF824)] [Escherichia coli O157:H7 str. EC4115]	VFG045884 (ECH74115_1101) periplasmic pilus chaperone family protein [E.coli laminin-binding fimbriae (ELF) (CVF824)] [Escherichia coli O157:H7 str. EC4115]	VFG035720_gi:260842456_ (ECO103_0224) hypothetical protein [ACE T6SS (CVF736)] [Escherichia coli O103:H2 str. 12009]	VFG035721_gi:260866370_ (ECO111_0230) hypothetical protein [ACE T6SS (CVF736)] [Escherichia coli O111:H- str. 11128]	VFG045859 (ECO55CA74_05720) putative fimbrial-like adhesin protein [E.coli laminin-binding fimbriae (ELF) (CVF824)] [Escherichia coli O55:H7 str. RM12579]	VFG045881 (ECO55CA74_05725) chaperone [E.coli laminin-binding fimbriae (ELF) (CVF824)] [Escherichia coli O55:H7 str. RM12579]	VFG046031 (ECP_0106) type IV pilin biogenesis protein [Hemorrhagic E.coli pilus (HCP) (CVF825)] [Escherichia coli 536]	VFG045993 (ECP_0107) hypothetical protein [Hemorrhagic E.coli pilus (HCP) (CVF825)] [Escherichia coli 536]	VFG045956 (ECP_0108) major pilin subunit [Hemorrhagic E.coli pilus (HCP) (CVF825)] [Escherichia coli 536]	VFG043545_gi:218560235_ (ECS88_3547) lipoprotein NlpI [NlpI (AI331)] [Escherichia coli O45:K1:H7 str. S88]	VFG046082 (ECVR50_0238) hypothetical protein [ACE T6SS (CVF736)] [Escherichia coli VR50]	VFG046083 (ECVR50_0239) IcmF-related protein [ACE T6SS (CVF736)] [Escherichia coli VR50]	VFG046084 (ECVR50_0240) uncharacterized protein ImpA [ACE T6SS (CVF736)] [Escherichia coli VR50]	VFG046086 (ECVR50_0242) putative protease [ACE T6SS (CVF736)] [Escherichia coli VR50]	VFG046090 (ECVR50_0246) hypothetical protein [ACE T6SS (CVF736)] [Escherichia coli VR50]	VFG046091 (ECVR50_0247) hypothetical protein [ACE T6SS (CVF736)] [Escherichia coli VR50]	VFG046092 (ECVR50_0248) hypothetical protein [ACE T6SS (CVF736)] [Escherichia coli VR50]	VFG046093 (ECVR50_0249) hypothetical protein [ACE T6SS (CVF736)] [Escherichia coli VR50]	VFG046094 (ECVR50_0250) uncharacterized protein ImpC [ACE T6SS (CVF736)] [Escherichia coli VR50]	VFG046096 (ECVR50_0257) hypothetical protein [ACE T6SS (CVF736)] [Escherichia coli VR50]	VFG035711_gi:15829483_ (ECs0229) hypothetical protein [ACE T6SS (CVF736)] [Escherichia coli O157:H7 str. Sakai]	VFG042095_gi:15832966_ (ECs3712) hypothetical protein [ETT2 (SS017)] [Escherichia coli O157:H7 str. Sakai]	VFG046001 (ETEC_0103) protein transport protein HofB [Hemorrhagic E.coli pilus (HCP) (CVF825)] [Escherichia coli O78:H11:K80 str. H10407]	VFG045896 (ETEC_1007) periplasmic pilin chaperone [E.coli laminin-binding fimbriae (ELF) (CVF824)] [Escherichia coli O78:H11:K80 str. H10407]	VFG045912 (ETEC_1008) fimbrial outer membrane usher protein [E.coli laminin-binding fimbriae (ELF) (CVF824)] [Escherichia coli O78:H11:K80 str. H10407]	VFG045932 (ETEC_1011) fimbrial precursor [E.coli laminin-binding fimbriae (ELF) (CVF824)] [Escherichia coli O78:H11:K80 str. H10407]	VFG035728_gi:157155723_ (EcE24377A_0237) hypothetical protein [ACE T6SS (CVF736)] [Escherichia coli E24377A]	VFG045931 (EcE24377A_1056) fimbrial protein [E.coli laminin-binding fimbriae (ELF) (CVF824)] [Escherichia coli E24377A]	VFG035715_gi:291281048_ (G2583_0236) hypothetical protein [ACE T6SS (CVF736)] [Escherichia coli O55:H7 str. CB9615]	VFG045926 (O3M_16610) fimbrial-like adhesin protein [E.coli laminin-binding fimbriae (ELF) (CVF824)] [Escherichia coli O104:H4 str. 2009EL-2050]	VFG045906 (O3M_16615) outer membrane usher protein [E.coli laminin-binding fimbriae (ELF) (CVF824)] [Escherichia coli O104:H4 str. 2009EL-2050]	VFG035722_gi:410484142_ (O3M_20335) type VI secretion system protein ImpG [ACE T6SS (CVF736)] [Escherichia coli O104:H4 str. 2009EL-2050]	VFG045950 (O3M_20925) major pilin subunit [Hemorrhagic E.coli pilus (HCP) (CVF825)] [Escherichia coli O104:H4 str. 2009EL-2050]	VFG045987 (O3M_20930) hypothetical protein [Hemorrhagic E.coli pilus (HCP) (CVF825)] [Escherichia coli O104:H4 str. 2009EL-2050]	VFG045875 (UMNK88_1093) major type 1 subunit fimbrin FimA [E.coli laminin-binding fimbriae (ELF) (CVF824)] [Escherichia coli UMNK88]	VFG045897 (UMNK88_1094) chaperone protein FocC [E.coli laminin-binding fimbriae (ELF) (CVF824)] [Escherichia coli UMNK88]	VFG045913 (UMNK88_1095) outer membrane usher protein FimD [E.coli laminin-binding fimbriae (ELF) (CVF824)] [Escherichia coli UMNK88]	VFG045933 (UMNK88_1096) hypothetical protein [E.coli laminin-binding fimbriae (ELF) (CVF824)] [Escherichia coli UMNK88]	VFG035729_gi:386612389_ (UMNK88_238) hypothetical protein [ACE T6SS (CVF736)] [Escherichia coli UMNK88]	VFG035710_gi:15799909_ (Z0260) hypothetical protein [EHS (SS185)] [Escherichia coli O157:H7 str. EDL933]
ECL19894	VFG046044 (APECO78_03970) type IV pilin biogenesis protein [Hemorrhagic E.coli pilus (HCP) (CVF825)] [Escherichia coli O78:H18 str. WS3294A]	VFG046007 (APECO78_03975) hypothetical protein [Hemorrhagic E.coli pilus (HCP) (CVF825)] [Escherichia coli O78:H18 str. WS3294A]	VFG045899 (APECO78_08685) periplasmic pilin chaperone [E.coli laminin-binding fimbriae (ELF) (CVF824)] [Escherichia coli O78:H18 str. WS3294A]	VFG045915 (APECO78_08690) outer membrane usher protein [E.coli laminin-binding fimbriae (ELF) (CVF824)] [Escherichia coli O78:H18 str. WS3294A]	VFG045935 (APECO78_08695) fimbrial-like adhesin protein [E.coli laminin-binding fimbriae (ELF) (CVF824)] [Escherichia coli O78:H18 str. WS3294A]	VFG045983 (CDCO157_0108) hypothetical protein [Hemorrhagic E.coli pilus (HCP) (CVF825)] [Escherichia coli O157:H7 str. Xuzhou21]	VFG045827 (EC958_1421) hemolysin E [Hemolysin/cytolysin A (CVF750)] [Escherichia coli O25b:H4-ST131]		VFG045826 (EC958_5138) Fluffing protein [Cah, AIDA-I type (CVF745)] [Escherichia coli O25b:H4-ST131]	VFG045862 (ECH74115_1100) fimbrial protein [E.coli laminin-binding fimbriae (ELF) (CVF824)] [Escherichia coli O157:H7 str. EC4115]	VFG045884 (ECH74115_1101) periplasmic pilus chaperone family protein [E.coli laminin-binding fimbriae (ELF) (CVF824)] [Escherichia coli O157:H7 str. EC4115]	VFG035720_gi:260842456_ (ECO103_0224) hypothetical protein [ACE T6SS (CVF736)] [Escherichia coli O103:H2 str. 12009]	VFG035721_gi:260866370_ (ECO111_0230) hypothetical protein [ACE T6SS (CVF736)] [Escherichia coli O111:H- str. 11128]	VFG045859 (ECO55CA74_05720) putative fimbrial-like adhesin protein [E.coli laminin-binding fimbriae (ELF) (CVF824)] [Escherichia coli O55:H7 str. RM12579]	VFG045881 (ECO55CA74_05725) chaperone [E.coli laminin-binding fimbriae (ELF) (CVF824)] [Escherichia coli O55:H7 str. RM12579]	VFG046031 (ECP_0106) type IV pilin biogenesis protein [Hemorrhagic E.coli pilus (HCP) (CVF825)] [Escherichia coli 536]	VFG045993 (ECP_0107) hypothetical protein [Hemorrhagic E.coli pilus (HCP) (CVF825)] [Escherichia coli 536]	VFG045956 (ECP_0108) major pilin subunit [Hemorrhagic E.coli pilus (HCP) (CVF825)] [Escherichia coli 536]	VFG043545_gi:218560235_ (ECS88_3547) lipoprotein NlpI [NlpI (AI331)] [Escherichia coli O45:K1:H7 str. S88]	VFG046082 (ECVR50_0238) hypothetical protein [ACE T6SS (CVF736)] [Escherichia coli VR50]	VFG046083 (ECVR50_0239) IcmF-related protein [ACE T6SS (CVF736)] [Escherichia coli VR50]	VFG046084 (ECVR50_0240) uncharacterized protein ImpA [ACE T6SS (CVF736)] [Escherichia coli VR50]	VFG046086 (ECVR50_0242) putative protease [ACE T6SS (CVF736)] [Escherichia coli VR50]	VFG046090 (ECVR50_0246) hypothetical protein [ACE T6SS (CVF736)] [Escherichia coli VR50]	VFG046091 (ECVR50_0247) hypothetical protein [ACE T6SS (CVF736)] [Escherichia coli VR50]	VFG046092 (ECVR50_0248) hypothetical protein [ACE T6SS (CVF736)] [Escherichia coli VR50]	VFG046093 (ECVR50_0249) hypothetical protein [ACE T6SS (CVF736)] [Escherichia coli VR50]	VFG046094 (ECVR50_0250) uncharacterized protein ImpC [ACE T6SS (CVF736)] [Escherichia coli VR50]	VFG046096 (ECVR50_0257) hypothetical protein [ACE T6SS (CVF736)] [Escherichia coli VR50]	VFG035711_gi:15829483_ (ECs0229) hypothetical protein [ACE T6SS (CVF736)] [Escherichia coli O157:H7 str. Sakai]	VFG042095_gi:15832966_ (ECs3712) hypothetical protein [ETT2 (SS017)] [Escherichia coli O157:H7 str. Sakai]	VFG046001 (ETEC_0103) protein transport protein HofB [Hemorrhagic E.coli pilus (HCP) (CVF825)] [Escherichia coli O78:H11:K80 str. H10407]	VFG045896 (ETEC_1007) periplasmic pilin chaperone [E.coli laminin-binding fimbriae (ELF) (CVF824)] [Escherichia coli O78:H11:K80 str. H10407]	VFG045912 (ETEC_1008) fimbrial outer membrane usher protein [E.coli laminin-binding fimbriae (ELF) (CVF824)] [Escherichia coli O78:H11:K80 str. H10407]	VFG045932 (ETEC_1011) fimbrial precursor [E.coli laminin-binding fimbriae (ELF) (CVF824)] [Escherichia coli O78:H11:K80 str. H10407]	VFG035728_gi:157155723_ (EcE24377A_0237) hypothetical protein [ACE T6SS (CVF736)] [Escherichia coli E24377A]	VFG045931 (EcE24377A_1056) fimbrial protein [E.coli laminin-binding fimbriae (ELF) (CVF824)] [Escherichia coli E24377A]	VFG035715_gi:291281048_ (G2583_0236) hypothetical protein [ACE T6SS (CVF736)] [Escherichia coli O55:H7 str. CB9615]	VFG045926 (O3M_16610) fimbrial-like adhesin protein [E.coli laminin-binding fimbriae (ELF) (CVF824)] [Escherichia coli O104:H4 str. 2009EL-2050]	VFG045906 (O3M_16615) outer membrane usher protein [E.coli laminin-binding fimbriae (ELF) (CVF824)] [Escherichia coli O104:H4 str. 2009EL-2050]	VFG035722_gi:410484142_ (O3M_20335) type VI secretion system protein ImpG [ACE T6SS (CVF736)] [Escherichia coli O104:H4 str. 2009EL-2050]	VFG045950 (O3M_20925) major pilin subunit [Hemorrhagic E.coli pilus (HCP) (CVF825)] [Escherichia coli O104:H4 str. 2009EL-2050]	VFG045987 (O3M_20930) hypothetical protein [Hemorrhagic E.coli pilus (HCP) (CVF825)] [Escherichia coli O104:H4 str. 2009EL-2050]	VFG045875 (UMNK88_1093) major type 1 subunit fimbrin FimA [E.coli laminin-binding fimbriae (ELF) (CVF824)] [Escherichia coli UMNK88]	VFG045897 (UMNK88_1094) chaperone protein FocC [E.coli laminin-binding fimbriae (ELF) (CVF824)] [Escherichia coli UMNK88]	VFG045913 (UMNK88_1095) outer membrane usher protein FimD [E.coli laminin-binding fimbriae (ELF) (CVF824)] [Escherichia coli UMNK88]	VFG045933 (UMNK88_1096) hypothetical protein [E.coli laminin-binding fimbriae (ELF) (CVF824)] [Escherichia coli UMNK88]	VFG035729_gi:386612389_ (UMNK88_238) hypothetical protein [ACE T6SS (CVF736)] [Escherichia coli UMNK88]	VFG035710_gi:15799909_ (Z0260) hypothetical protein [EHS (SS185)] [Escherichia coli O157:H7 str. EDL933]
ECL19901	VFG046044 (APECO78_03970) type IV pilin biogenesis protein [Hemorrhagic E.coli pilus (HCP) (CVF825)] [Escherichia coli O78:H18 str. WS3294A]	VFG046007 (APECO78_03975) hypothetical protein [Hemorrhagic E.coli pilus (HCP) (CVF825)] [Escherichia coli O78:H18 str. WS3294A]	VFG045899 (APECO78_08685) periplasmic pilin chaperone [E.coli laminin-binding fimbriae (ELF) (CVF824)] [Escherichia coli O78:H18 str. WS3294A]	VFG045915 (APECO78_08690) outer membrane usher protein [E.coli laminin-binding fimbriae (ELF) (CVF824)] [Escherichia coli O78:H18 str. WS3294A]	VFG045935 (APECO78_08695) fimbrial-like adhesin protein [E.coli laminin-binding fimbriae (ELF) (CVF824)] [Escherichia coli O78:H18 str. WS3294A]	VFG045983 (CDCO157_0108) hypothetical protein [Hemorrhagic E.coli pilus (HCP) (CVF825)] [Escherichia coli O157:H7 str. Xuzhou21]	VFG045827 (EC958_1421) hemolysin E [Hemolysin/cytolysin A (CVF750)] [Escherichia coli O25b:H4-ST131]			VFG045862 (ECH74115_1100) fimbrial protein [E.coli laminin-binding fimbriae (ELF) (CVF824)] [Escherichia coli O157:H7 str. EC4115]	VFG045884 (ECH74115_1101) periplasmic pilus chaperone family protein [E.coli laminin-binding fimbriae (ELF) (CVF824)] [Escherichia coli O157:H7 str. EC4115]	VFG035720_gi:260842456_ (ECO103_0224) hypothetical protein [ACE T6SS (CVF736)] [Escherichia coli O103:H2 str. 12009]	VFG035721_gi:260866370_ (ECO111_0230) hypothetical protein [ACE T6SS (CVF736)] [Escherichia coli O111:H- str. 11128]	VFG045859 (ECO55CA74_05720) putative fimbrial-like adhesin protein [E.coli laminin-binding fimbriae (ELF) (CVF824)] [Escherichia coli O55:H7 str. RM12579]	VFG045881 (ECO55CA74_05725) chaperone [E.coli laminin-binding fimbriae (ELF) (CVF824)] [Escherichia coli O55:H7 str. RM12579]	VFG046031 (ECP_0106) type IV pilin biogenesis protein [Hemorrhagic E.coli pilus (HCP) (CVF825)] [Escherichia coli 536]	VFG045993 (ECP_0107) hypothetical protein [Hemorrhagic E.coli pilus (HCP) (CVF825)] [Escherichia coli 536]	VFG045956 (ECP_0108) major pilin subunit [Hemorrhagic E.coli pilus (HCP) (CVF825)] [Escherichia coli 536]	VFG043545_gi:218560235_ (ECS88_3547) lipoprotein NlpI [NlpI (AI331)] [Escherichia coli O45:K1:H7 str. S88]	VFG046082 (ECVR50_0238) hypothetical protein [ACE T6SS (CVF736)] [Escherichia coli VR50]	VFG046083 (ECVR50_0239) IcmF-related protein [ACE T6SS (CVF736)] [Escherichia coli VR50]	VFG046084 (ECVR50_0240) uncharacterized protein ImpA [ACE T6SS (CVF736)] [Escherichia coli VR50]	VFG046086 (ECVR50_0242) putative protease [ACE T6SS (CVF736)] [Escherichia coli VR50]	VFG046090 (ECVR50_0246) hypothetical protein [ACE T6SS (CVF736)] [Escherichia coli VR50]	VFG046091 (ECVR50_0247) hypothetical protein [ACE T6SS (CVF736)] [Escherichia coli VR50]	VFG046092 (ECVR50_0248) hypothetical protein [ACE T6SS (CVF736)] [Escherichia coli VR50]	VFG046093 (ECVR50_0249) hypothetical protein [ACE T6SS (CVF736)] [Escherichia coli VR50]	VFG046094 (ECVR50_0250) uncharacterized protein ImpC [ACE T6SS (CVF736)] [Escherichia coli VR50]	VFG046096 (ECVR50_0257) hypothetical protein [ACE T6SS (CVF736)] [Escherichia coli VR50]	VFG035711_gi:15829483_ (ECs0229) hypothetical protein [ACE T6SS (CVF736)] [Escherichia coli O157:H7 str. Sakai]	VFG042095_gi:15832966_ (ECs3712) hypothetical protein [ETT2 (SS017)] [Escherichia coli O157:H7 str. Sakai]	VFG046001 (ETEC_0103) protein transport protein HofB [Hemorrhagic E.coli pilus (HCP) (CVF825)] [Escherichia coli O78:H11:K80 str. H10407]	VFG045896 (ETEC_1007) periplasmic pilin chaperone [E.coli laminin-binding fimbriae (ELF) (CVF824)] [Escherichia coli O78:H11:K80 str. H10407]	VFG045912 (ETEC_1008) fimbrial outer membrane usher protein [E.coli laminin-binding fimbriae (ELF) (CVF824)] [Escherichia coli O78:H11:K80 str. H10407]	VFG045932 (ETEC_1011) fimbrial precursor [E.coli laminin-binding fimbriae (ELF) (CVF824)] [Escherichia coli O78:H11:K80 str. H10407]	VFG035728_gi:157155723_ (EcE24377A_0237) hypothetical protein [ACE T6SS (CVF736)] [Escherichia coli E24377A]	VFG045931 (EcE24377A_1056) fimbrial protein [E.coli laminin-binding fimbriae (ELF) (CVF824)] [Escherichia coli E24377A]	VFG035715_gi:291281048_ (G2583_0236) hypothetical protein [ACE T6SS (CVF736)] [Escherichia coli O55:H7 str. CB9615]	VFG045926 (O3M_16610) fimbrial-like adhesin protein [E.coli laminin-binding fimbriae (ELF) (CVF824)] [Escherichia coli O104:H4 str. 2009EL-2050]	VFG045906 (O3M_16615) outer membrane usher protein [E.coli laminin-binding fimbriae (ELF) (CVF824)] [Escherichia coli O104:H4 str. 2009EL-2050]	VFG035722_gi:410484142_ (O3M_20335) type VI secretion system protein ImpG [ACE T6SS (CVF736)] [Escherichia coli O104:H4 str. 2009EL-2050]	VFG045950 (O3M_20925) major pilin subunit [Hemorrhagic E.coli pilus (HCP) (CVF825)] [Escherichia coli O104:H4 str. 2009EL-2050]	VFG045987 (O3M_20930) hypothetical protein [Hemorrhagic E.coli pilus (HCP) (CVF825)] [Escherichia coli O104:H4 str. 2009EL-2050]	VFG045875 (UMNK88_1093) major type 1 subunit fimbrin FimA [E.coli laminin-binding fimbriae (ELF) (CVF824)] [Escherichia coli UMNK88]	VFG045897 (UMNK88_1094) chaperone protein FocC [E.coli laminin-binding fimbriae (ELF) (CVF824)] [Escherichia coli UMNK88]	VFG045913 (UMNK88_1095) outer membrane usher protein FimD [E.coli laminin-binding fimbriae (ELF) (CVF824)] [Escherichia coli UMNK88]	VFG045933 (UMNK88_1096) hypothetical protein [E.coli laminin-binding fimbriae (ELF) (CVF824)] [Escherichia coli UMNK88]	VFG035729_gi:386612389_ (UMNK88_238) hypothetical protein [ACE T6SS (CVF736)] [Escherichia coli UMNK88]	VFG035710_gi:15799909_ (Z0260) hypothetical protein [EHS (SS185)] [Escherichia coli O157:H7 str. EDL933]
ECL19902	VFG046044 (APECO78_03970) type IV pilin biogenesis protein [Hemorrhagic E.coli pilus (HCP) (CVF825)] [Escherichia coli O78:H18 str. WS3294A]	VFG046007 (APECO78_03975) hypothetical protein [Hemorrhagic E.coli pilus (HCP) (CVF825)] [Escherichia coli O78:H18 str. WS3294A]	VFG045899 (APECO78_08685) periplasmic pilin chaperone [E.coli laminin-binding fimbriae (ELF) (CVF824)] [Escherichia coli O78:H18 str. WS3294A]	VFG045915 (APECO78_08690) outer membrane usher protein [E.coli laminin-binding fimbriae (ELF) (CVF824)] [Escherichia coli O78:H18 str. WS3294A]	VFG045935 (APECO78_08695) fimbrial-like adhesin protein [E.coli laminin-binding fimbriae (ELF) (CVF824)] [Escherichia coli O78:H18 str. WS3294A]	VFG045983 (CDCO157_0108) hypothetical protein [Hemorrhagic E.coli pilus (HCP) (CVF825)] [Escherichia coli O157:H7 str. Xuzhou21]	VFG045827 (EC958_1421) hemolysin E [Hemolysin/cytolysin A (CVF750)] [Escherichia coli O25b:H4-ST131]			VFG045862 (ECH74115_1100) fimbrial protein [E.coli laminin-binding fimbriae (ELF) (CVF824)] [Escherichia coli O157:H7 str. EC4115]	VFG045884 (ECH74115_1101) periplasmic pilus chaperone family protein [E.coli laminin-binding fimbriae (ELF) (CVF824)] [Escherichia coli O157:H7 str. EC4115]	VFG035720_gi:260842456_ (ECO103_0224) hypothetical protein [ACE T6SS (CVF736)] [Escherichia coli O103:H2 str. 12009]	VFG035721_gi:260866370_ (ECO111_0230) hypothetical protein [ACE T6SS (CVF736)] [Escherichia coli O111:H- str. 11128]	VFG045859 (ECO55CA74_05720) putative fimbrial-like adhesin protein [E.coli laminin-binding fimbriae (ELF) (CVF824)] [Escherichia coli O55:H7 str. RM12579]	VFG045881 (ECO55CA74_05725) chaperone [E.coli laminin-binding fimbriae (ELF) (CVF824)] [Escherichia coli O55:H7 str. RM12579]	VFG046031 (ECP_0106) type IV pilin biogenesis protein [Hemorrhagic E.coli pilus (HCP) (CVF825)] [Escherichia coli 536]	VFG045993 (ECP_0107) hypothetical protein [Hemorrhagic E.coli pilus (HCP) (CVF825)] [Escherichia coli 536]	VFG045956 (ECP_0108) major pilin subunit [Hemorrhagic E.coli pilus (HCP) (CVF825)] [Escherichia coli 536]	VFG043545_gi:218560235_ (ECS88_3547) lipoprotein NlpI [NlpI (AI331)] [Escherichia coli O45:K1:H7 str. S88]	VFG046082 (ECVR50_0238) hypothetical protein [ACE T6SS (CVF736)] [Escherichia coli VR50]	VFG046083 (ECVR50_0239) IcmF-related protein [ACE T6SS (CVF736)] [Escherichia coli VR50]	VFG046084 (ECVR50_0240) uncharacterized protein ImpA [ACE T6SS (CVF736)] [Escherichia coli VR50]	VFG046086 (ECVR50_0242) putative protease [ACE T6SS (CVF736)] [Escherichia coli VR50]	VFG046090 (ECVR50_0246) hypothetical protein [ACE T6SS (CVF736)] [Escherichia coli VR50]	VFG046091 (ECVR50_0247) hypothetical protein [ACE T6SS (CVF736)] [Escherichia coli VR50]	VFG046092 (ECVR50_0248) hypothetical protein [ACE T6SS (CVF736)] [Escherichia coli VR50]	VFG046093 (ECVR50_0249) hypothetical protein [ACE T6SS (CVF736)] [Escherichia coli VR50]	VFG046094 (ECVR50_0250) uncharacterized protein ImpC [ACE T6SS (CVF736)] [Escherichia coli VR50]	VFG046096 (ECVR50_0257) hypothetical protein [ACE T6SS (CVF736)] [Escherichia coli VR50]	VFG035711_gi:15829483_ (ECs0229) hypothetical protein [ACE T6SS (CVF736)] [Escherichia coli O157:H7 str. Sakai]	VFG042095_gi:15832966_ (ECs3712) hypothetical protein [ETT2 (SS017)] [Escherichia coli O157:H7 str. Sakai]	VFG046001 (ETEC_0103) protein transport protein HofB [Hemorrhagic E.coli pilus (HCP) (CVF825)] [Escherichia coli O78:H11:K80 str. H10407]	VFG045896 (ETEC_1007) periplasmic pilin chaperone [E.coli laminin-binding fimbriae (ELF) (CVF824)] [Escherichia coli O78:H11:K80 str. H10407]	VFG045912 (ETEC_1008) fimbrial outer membrane usher protein [E.coli laminin-binding fimbriae (ELF) (CVF824)] [Escherichia coli O78:H11:K80 str. H10407]	VFG045932 (ETEC_1011) fimbrial precursor [E.coli laminin-binding fimbriae (ELF) (CVF824)] [Escherichia coli O78:H11:K80 str. H10407]	VFG035728_gi:157155723_ (EcE24377A_0237) hypothetical protein [ACE T6SS (CVF736)] [Escherichia coli E24377A]	VFG045931 (EcE24377A_1056) fimbrial protein [E.coli laminin-binding fimbriae (ELF) (CVF824)] [Escherichia coli E24377A]	VFG035715_gi:291281048_ (G2583_0236) hypothetical protein [ACE T6SS (CVF736)] [Escherichia coli O55:H7 str. CB9615]	VFG045926 (O3M_16610) fimbrial-like adhesin protein [E.coli laminin-binding fimbriae (ELF) (CVF824)] [Escherichia coli O104:H4 str. 2009EL-2050]	VFG045906 (O3M_16615) outer membrane usher protein [E.coli laminin-binding fimbriae (ELF) (CVF824)] [Escherichia coli O104:H4 str. 2009EL-2050]	VFG035722_gi:410484142_ (O3M_20335) type VI secretion system protein ImpG [ACE T6SS (CVF736)] [Escherichia coli O104:H4 str. 2009EL-2050]	VFG045950 (O3M_20925) major pilin subunit [Hemorrhagic E.coli pilus (HCP) (CVF825)] [Escherichia coli O104:H4 str. 2009EL-2050]	VFG045987 (O3M_20930) hypothetical protein [Hemorrhagic E.coli pilus (HCP) (CVF825)] [Escherichia coli O104:H4 str. 2009EL-2050]	VFG045875 (UMNK88_1093) major type 1 subunit fimbrin FimA [E.coli laminin-binding fimbriae (ELF) (CVF824)] [Escherichia coli UMNK88]	VFG045897 (UMNK88_1094) chaperone protein FocC [E.coli laminin-binding fimbriae (ELF) (CVF824)] [Escherichia coli UMNK88]	VFG045913 (UMNK88_1095) outer membrane usher protein FimD [E.coli laminin-binding fimbriae (ELF) (CVF824)] [Escherichia coli UMNK88]	VFG045933 (UMNK88_1096) hypothetical protein [E.coli laminin-binding fimbriae (ELF) (CVF824)] [Escherichia coli UMNK88]	VFG035729_gi:386612389_ (UMNK88_238) hypothetical protein [ACE T6SS (CVF736)] [Escherichia coli UMNK88]	VFG035710_gi:15799909_ (Z0260) hypothetical protein [EHS (SS185)] [Escherichia coli O157:H7 str. EDL933]
ECL19916	VFG046044 (APECO78_03970) type IV pilin biogenesis protein [Hemorrhagic E.coli pilus (HCP) (CVF825)] [Escherichia coli O78:H18 str. WS3294A]	VFG046007 (APECO78_03975) hypothetical protein [Hemorrhagic E.coli pilus (HCP) (CVF825)] [Escherichia coli O78:H18 str. WS3294A]	VFG045899 (APECO78_08685) periplasmic pilin chaperone [E.coli laminin-binding fimbriae (ELF) (CVF824)] [Escherichia coli O78:H18 str. WS3294A]	VFG045915 (APECO78_08690) outer membrane usher protein [E.coli laminin-binding fimbriae (ELF) (CVF824)] [Escherichia coli O78:H18 str. WS3294A]	VFG045935 (APECO78_08695) fimbrial-like adhesin protein [E.coli laminin-binding fimbriae (ELF) (CVF824)] [Escherichia coli O78:H18 str. WS3294A]	VFG045983 (CDCO157_0108) hypothetical protein [Hemorrhagic E.coli pilus (HCP) (CVF825)] [Escherichia coli O157:H7 str. Xuzhou21]	VFG045827 (EC958_1421) hemolysin E [Hemolysin/cytolysin A (CVF750)] [Escherichia coli O25b:H4-ST131]	VFG045820 (EC958_4121) putative autotransporter [AIDA-I (CVF450)] [Escherichia coli O25b:H4-ST131]	VFG045826 (EC958_5138) Fluffing protein [Cah, AIDA-I type (CVF745)] [Escherichia coli O25b:H4-ST131]	VFG045862 (ECH74115_1100) fimbrial protein [E.coli laminin-binding fimbriae (ELF) (CVF824)] [Escherichia coli O157:H7 str. EC4115]	VFG045884 (ECH74115_1101) periplasmic pilus chaperone family protein [E.coli laminin-binding fimbriae (ELF) (CVF824)] [Escherichia coli O157:H7 str. EC4115]	VFG035720_gi:260842456_ (ECO103_0224) hypothetical protein [ACE T6SS (CVF736)] [Escherichia coli O103:H2 str. 12009]	VFG035721_gi:260866370_ (ECO111_0230) hypothetical protein [ACE T6SS (CVF736)] [Escherichia coli O111:H- str. 11128]	VFG045859 (ECO55CA74_05720) putative fimbrial-like adhesin protein [E.coli laminin-binding fimbriae (ELF) (CVF824)] [Escherichia coli O55:H7 str. RM12579]	VFG045881 (ECO55CA74_05725) chaperone [E.coli laminin-binding fimbriae (ELF) (CVF824)] [Escherichia coli O55:H7 str. RM12579]	VFG046031 (ECP_0106) type IV pilin biogenesis protein [Hemorrhagic E.coli pilus (HCP) (CVF825)] [Escherichia coli 536]	VFG045993 (ECP_0107) hypothetical protein [Hemorrhagic E.coli pilus (HCP) (CVF825)] [Escherichia coli 536]	VFG045956 (ECP_0108) major pilin subunit [Hemorrhagic E.coli pilus (HCP) (CVF825)] [Escherichia coli 536]	VFG043545_gi:218560235_ (ECS88_3547) lipoprotein NlpI [NlpI (AI331)] [Escherichia coli O45:K1:H7 str. S88]	VFG046082 (ECVR50_0238) hypothetical protein [ACE T6SS (CVF736)] [Escherichia coli VR50]	VFG046083 (ECVR50_0239) IcmF-related protein [ACE T6SS (CVF736)] [Escherichia coli VR50]	VFG046084 (ECVR50_0240) uncharacterized protein ImpA [ACE T6SS (CVF736)] [Escherichia coli VR50]	VFG046086 (ECVR50_0242) putative protease [ACE T6SS (CVF736)] [Escherichia coli VR50]	VFG046090 (ECVR50_0246) hypothetical protein [ACE T6SS (CVF736)] [Escherichia coli VR50]	VFG046091 (ECVR50_0247) hypothetical protein [ACE T6SS (CVF736)] [Escherichia coli VR50]	VFG046092 (ECVR50_0248) hypothetical protein [ACE T6SS (CVF736)] [Escherichia coli VR50]	VFG046093 (ECVR50_0249) hypothetical protein [ACE T6SS (CVF736)] [Escherichia coli VR50]	VFG046094 (ECVR50_0250) uncharacterized protein ImpC [ACE T6SS (CVF736)] [Escherichia coli VR50]	VFG046096 (ECVR50_0257) hypothetical protein [ACE T6SS (CVF736)] [Escherichia coli VR50]	VFG035711_gi:15829483_ (ECs0229) hypothetical protein [ACE T6SS (CVF736)] [Escherichia coli O157:H7 str. Sakai]	VFG042095_gi:15832966_ (ECs3712) hypothetical protein [ETT2 (SS017)] [Escherichia coli O157:H7 str. Sakai]	VFG046001 (ETEC_0103) protein transport protein HofB [Hemorrhagic E.coli pilus (HCP) (CVF825)] [Escherichia coli O78:H11:K80 str. H10407]	VFG045896 (ETEC_1007) periplasmic pilin chaperone [E.coli laminin-binding fimbriae (ELF) (CVF824)] [Escherichia coli O78:H11:K80 str. H10407]	VFG045912 (ETEC_1008) fimbrial outer membrane usher protein [E.coli laminin-binding fimbriae (ELF) (CVF824)] [Escherichia coli O78:H11:K80 str. H10407]	VFG045932 (ETEC_1011) fimbrial precursor [E.coli laminin-binding fimbriae (ELF) (CVF824)] [Escherichia coli O78:H11:K80 str. H10407]	VFG035728_gi:157155723_ (EcE24377A_0237) hypothetical protein [ACE T6SS (CVF736)] [Escherichia coli E24377A]	VFG045931 (EcE24377A_1056) fimbrial protein [E.coli laminin-binding fimbriae (ELF) (CVF824)] [Escherichia coli E24377A]	VFG035715_gi:291281048_ (G2583_0236) hypothetical protein [ACE T6SS (CVF736)] [Escherichia coli O55:H7 str. CB9615]	VFG045926 (O3M_16610) fimbrial-like adhesin protein [E.coli laminin-binding fimbriae (ELF) (CVF824)] [Escherichia coli O104:H4 str. 2009EL-2050]	VFG045906 (O3M_16615) outer membrane usher protein [E.coli laminin-binding fimbriae (ELF) (CVF824)] [Escherichia coli O104:H4 str. 2009EL-2050]	VFG035722_gi:410484142_ (O3M_20335) type VI secretion system protein ImpG [ACE T6SS (CVF736)] [Escherichia coli O104:H4 str. 2009EL-2050]	VFG045950 (O3M_20925) major pilin subunit [Hemorrhagic E.coli pilus (HCP) (CVF825)] [Escherichia coli O104:H4 str. 2009EL-2050]	VFG045987 (O3M_20930) hypothetical protein [Hemorrhagic E.coli pilus (HCP) (CVF825)] [Escherichia coli O104:H4 str. 2009EL-2050]	VFG045875 (UMNK88_1093) major type 1 subunit fimbrin FimA [E.coli laminin-binding fimbriae (ELF) (CVF824)] [Escherichia coli UMNK88]	VFG045897 (UMNK88_1094) chaperone protein FocC [E.coli laminin-binding fimbriae (ELF) (CVF824)] [Escherichia coli UMNK88]	VFG045913 (UMNK88_1095) outer membrane usher protein FimD [E.coli laminin-binding fimbriae (ELF) (CVF824)] [Escherichia coli UMNK88]	VFG045933 (UMNK88_1096) hypothetical protein [E.coli laminin-binding fimbriae (ELF) (CVF824)] [Escherichia coli UMNK88]	VFG035729_gi:386612389_ (UMNK88_238) hypothetical protein [ACE T6SS (CVF736)] [Escherichia coli UMNK88]	VFG035710_gi:15799909_ (Z0260) hypothetical protein [EHS (SS185)] [Escherichia coli O157:H7 str. EDL933]
ECL19931	VFG046044 (APECO78_03970) type IV pilin biogenesis protein [Hemorrhagic E.coli pilus (HCP) (CVF825)] [Escherichia coli O78:H18 str. WS3294A]	VFG046007 (APECO78_03975) hypothetical protein [Hemorrhagic E.coli pilus (HCP) (CVF825)] [Escherichia coli O78:H18 str. WS3294A]	VFG045899 (APECO78_08685) periplasmic pilin chaperone [E.coli laminin-binding fimbriae (ELF) (CVF824)] [Escherichia coli O78:H18 str. WS3294A]	VFG045915 (APECO78_08690) outer membrane usher protein [E.coli laminin-binding fimbriae (ELF) (CVF824)] [Escherichia coli O78:H18 str. WS3294A]	VFG045935 (APECO78_08695) fimbrial-like adhesin protein [E.coli laminin-binding fimbriae (ELF) (CVF824)] [Escherichia coli O78:H18 str. WS3294A]	VFG045983 (CDCO157_0108) hypothetical protein [Hemorrhagic E.coli pilus (HCP) (CVF825)] [Escherichia coli O157:H7 str. Xuzhou21]	VFG045827 (EC958_1421) hemolysin E [Hemolysin/cytolysin A (CVF750)] [Escherichia coli O25b:H4-ST131]				VFG045884 (ECH74115_1101) periplasmic pilus chaperone family protein [E.coli laminin-binding fimbriae (ELF) (CVF824)] [Escherichia coli O157:H7 str. EC4115]				VFG045881 (ECO55CA74_05725) chaperone [E.coli laminin-binding fimbriae (ELF) (CVF824)] [Escherichia coli O55:H7 str. RM12579]	VFG046031 (ECP_0106) type IV pilin biogenesis protein [Hemorrhagic E.coli pilus (HCP) (CVF825)] [Escherichia coli 536]	VFG045993 (ECP_0107) hypothetical protein [Hemorrhagic E.coli pilus (HCP) (CVF825)] [Escherichia coli 536]	VFG045956 (ECP_0108) major pilin subunit [Hemorrhagic E.coli pilus (HCP) (CVF825)] [Escherichia coli 536]	VFG043545_gi:218560235_ (ECS88_3547) lipoprotein NlpI [NlpI (AI331)] [Escherichia coli O45:K1:H7 str. S88]												VFG042095_gi:15832966_ (ECs3712) hypothetical protein [ETT2 (SS017)] [Escherichia coli O157:H7 str. Sakai]	VFG046001 (ETEC_0103) protein transport protein HofB [Hemorrhagic E.coli pilus (HCP) (CVF825)] [Escherichia coli O78:H11:K80 str. H10407]	VFG045896 (ETEC_1007) periplasmic pilin chaperone [E.coli laminin-binding fimbriae (ELF) (CVF824)] [Escherichia coli O78:H11:K80 str. H10407]	VFG045912 (ETEC_1008) fimbrial outer membrane usher protein [E.coli laminin-binding fimbriae (ELF) (CVF824)] [Escherichia coli O78:H11:K80 str. H10407]	VFG045932 (ETEC_1011) fimbrial precursor [E.coli laminin-binding fimbriae (ELF) (CVF824)] [Escherichia coli O78:H11:K80 str. H10407]		VFG045931 (EcE24377A_1056) fimbrial protein [E.coli laminin-binding fimbriae (ELF) (CVF824)] [Escherichia coli E24377A]		VFG045926 (O3M_16610) fimbrial-like adhesin protein [E.coli laminin-binding fimbriae (ELF) (CVF824)] [Escherichia coli O104:H4 str. 2009EL-2050]	VFG045906 (O3M_16615) outer membrane usher protein [E.coli laminin-binding fimbriae (ELF) (CVF824)] [Escherichia coli O104:H4 str. 2009EL-2050]		VFG045950 (O3M_20925) major pilin subunit [Hemorrhagic E.coli pilus (HCP) (CVF825)] [Escherichia coli O104:H4 str. 2009EL-2050]	VFG045987 (O3M_20930) hypothetical protein [Hemorrhagic E.coli pilus (HCP) (CVF825)] [Escherichia coli O104:H4 str. 2009EL-2050]		VFG045897 (UMNK88_1094) chaperone protein FocC [E.coli laminin-binding fimbriae (ELF) (CVF824)] [Escherichia coli UMNK88]	VFG045913 (UMNK88_1095) outer membrane usher protein FimD [E.coli laminin-binding fimbriae (ELF) (CVF824)] [Escherichia coli UMNK88]	VFG045933 (UMNK88_1096) hypothetical protein [E.coli laminin-binding fimbriae (ELF) (CVF824)] [Escherichia coli UMNK88]
ECL19939	VFG046044 (APECO78_03970) type IV pilin biogenesis protein [Hemorrhagic E.coli pilus (HCP) (CVF825)] [Escherichia coli O78:H18 str. WS3294A]	VFG046007 (APECO78_03975) hypothetical protein [Hemorrhagic E.coli pilus (HCP) (CVF825)] [Escherichia coli O78:H18 str. WS3294A]	VFG045899 (APECO78_08685) periplasmic pilin chaperone [E.coli laminin-binding fimbriae (ELF) (CVF824)] [Escherichia coli O78:H18 str. WS3294A]	VFG045915 (APECO78_08690) outer membrane usher protein [E.coli laminin-binding fimbriae (ELF) (CVF824)] [Escherichia coli O78:H18 str. WS3294A]	VFG045935 (APECO78_08695) fimbrial-like adhesin protein [E.coli laminin-binding fimbriae (ELF) (CVF824)] [Escherichia coli O78:H18 str. WS3294A]	VFG045983 (CDCO157_0108) hypothetical protein [Hemorrhagic E.coli pilus (HCP) (CVF825)] [Escherichia coli O157:H7 str. Xuzhou21]	VFG045827 (EC958_1421) hemolysin E [Hemolysin/cytolysin A (CVF750)] [Escherichia coli O25b:H4-ST131]		VFG045826 (EC958_5138) Fluffing protein [Cah, AIDA-I type (CVF745)] [Escherichia coli O25b:H4-ST131]	VFG045862 (ECH74115_1100) fimbrial protein [E.coli laminin-binding fimbriae (ELF) (CVF824)] [Escherichia coli O157:H7 str. EC4115]	VFG045884 (ECH74115_1101) periplasmic pilus chaperone family protein [E.coli laminin-binding fimbriae (ELF) (CVF824)] [Escherichia coli O157:H7 str. EC4115]	VFG035720_gi:260842456_ (ECO103_0224) hypothetical protein [ACE T6SS (CVF736)] [Escherichia coli O103:H2 str. 12009]	VFG035721_gi:260866370_ (ECO111_0230) hypothetical protein [ACE T6SS (CVF736)] [Escherichia coli O111:H- str. 11128]	VFG045859 (ECO55CA74_05720) putative fimbrial-like adhesin protein [E.coli laminin-binding fimbriae (ELF) (CVF824)] [Escherichia coli O55:H7 str. RM12579]	VFG045881 (ECO55CA74_05725) chaperone [E.coli laminin-binding fimbriae (ELF) (CVF824)] [Escherichia coli O55:H7 str. RM12579]	VFG046031 (ECP_0106) type IV pilin biogenesis protein [Hemorrhagic E.coli pilus (HCP) (CVF825)] [Escherichia coli 536]	VFG045993 (ECP_0107) hypothetical protein [Hemorrhagic E.coli pilus (HCP) (CVF825)] [Escherichia coli 536]	VFG045956 (ECP_0108) major pilin subunit [Hemorrhagic E.coli pilus (HCP) (CVF825)] [Escherichia coli 536]	VFG043545_gi:218560235_ (ECS88_3547) lipoprotein NlpI [NlpI (AI331)] [Escherichia coli O45:K1:H7 str. S88]	VFG046082 (ECVR50_0238) hypothetical protein [ACE T6SS (CVF736)] [Escherichia coli VR50]	VFG046083 (ECVR50_0239) IcmF-related protein [ACE T6SS (CVF736)] [Escherichia coli VR50]	VFG046084 (ECVR50_0240) uncharacterized protein ImpA [ACE T6SS (CVF736)] [Escherichia coli VR50]	VFG046086 (ECVR50_0242) putative protease [ACE T6SS (CVF736)] [Escherichia coli VR50]	VFG046090 (ECVR50_0246) hypothetical protein [ACE T6SS (CVF736)] [Escherichia coli VR50]	VFG046091 (ECVR50_0247) hypothetical protein [ACE T6SS (CVF736)] [Escherichia coli VR50]	VFG046092 (ECVR50_0248) hypothetical protein [ACE T6SS (CVF736)] [Escherichia coli VR50]	VFG046093 (ECVR50_0249) hypothetical protein [ACE T6SS (CVF736)] [Escherichia coli VR50]	VFG046094 (ECVR50_0250) uncharacterized protein ImpC [ACE T6SS (CVF736)] [Escherichia coli VR50]	VFG046096 (ECVR50_0257) hypothetical protein [ACE T6SS (CVF736)] [Escherichia coli VR50]	VFG035711_gi:15829483_ (ECs0229) hypothetical protein [ACE T6SS (CVF736)] [Escherichia coli O157:H7 str. Sakai]	VFG042095_gi:15832966_ (ECs3712) hypothetical protein [ETT2 (SS017)] [Escherichia coli O157:H7 str. Sakai]	VFG046001 (ETEC_0103) protein transport protein HofB [Hemorrhagic E.coli pilus (HCP) (CVF825)] [Escherichia coli O78:H11:K80 str. H10407]	VFG045896 (ETEC_1007) periplasmic pilin chaperone [E.coli laminin-binding fimbriae (ELF) (CVF824)] [Escherichia coli O78:H11:K80 str. H10407]	VFG045912 (ETEC_1008) fimbrial outer membrane usher protein [E.coli laminin-binding fimbriae (ELF) (CVF824)] [Escherichia coli O78:H11:K80 str. H10407]	VFG045932 (ETEC_1011) fimbrial precursor [E.coli laminin-binding fimbriae (ELF) (CVF824)] [Escherichia coli O78:H11:K80 str. H10407]	VFG035728_gi:157155723_ (EcE24377A_0237) hypothetical protein [ACE T6SS (CVF736)] [Escherichia coli E24377A]	VFG045931 (EcE24377A_1056) fimbrial protein [E.coli laminin-binding fimbriae (ELF) (CVF824)] [Escherichia coli E24377A]	VFG035715_gi:291281048_ (G2583_0236) hypothetical protein [ACE T6SS (CVF736)] [Escherichia coli O55:H7 str. CB9615]	VFG045926 (O3M_16610) fimbrial-like adhesin protein [E.coli laminin-binding fimbriae (ELF) (CVF824)] [Escherichia coli O104:H4 str. 2009EL-2050]	VFG045906 (O3M_16615) outer membrane usher protein [E.coli laminin-binding fimbriae (ELF) (CVF824)] [Escherichia coli O104:H4 str. 2009EL-2050]	VFG035722_gi:410484142_ (O3M_20335) type VI secretion system protein ImpG [ACE T6SS (CVF736)] [Escherichia coli O104:H4 str. 2009EL-2050]	VFG045950 (O3M_20925) major pilin subunit [Hemorrhagic E.coli pilus (HCP) (CVF825)] [Escherichia coli O104:H4 str. 2009EL-2050]	VFG045987 (O3M_20930) hypothetical protein [Hemorrhagic E.coli pilus (HCP) (CVF825)] [Escherichia coli O104:H4 str. 2009EL-2050]	VFG045875 (UMNK88_1093) major type 1 subunit fimbrin FimA [E.coli laminin-binding fimbriae (ELF) (CVF824)] [Escherichia coli UMNK88]	VFG045897 (UMNK88_1094) chaperone protein FocC [E.coli laminin-binding fimbriae (ELF) (CVF824)] [Escherichia coli UMNK88]	VFG045913 (UMNK88_1095) outer membrane usher protein FimD [E.coli laminin-binding fimbriae (ELF) (CVF824)] [Escherichia coli UMNK88]	VFG045933 (UMNK88_1096) hypothetical protein [E.coli laminin-binding fimbriae (ELF) (CVF824)] [Escherichia coli UMNK88]	VFG035729_gi:386612389_ (UMNK88_238) hypothetical protein [ACE T6SS (CVF736)] [Escherichia coli UMNK88]	VFG035710_gi:15799909_ (Z0260) hypothetical protein [EHS (SS185)] [Escherichia coli O157:H7 str. EDL933]
ECL19990	VFG046044 (APECO78_03970) type IV pilin biogenesis protein [Hemorrhagic E.coli pilus (HCP) (CVF825)] [Escherichia coli O78:H18 str. WS3294A]	VFG046007 (APECO78_03975) hypothetical protein [Hemorrhagic E.coli pilus (HCP) (CVF825)] [Escherichia coli O78:H18 str. WS3294A]	VFG045899 (APECO78_08685) periplasmic pilin chaperone [E.coli laminin-binding fimbriae (ELF) (CVF824)] [Escherichia coli O78:H18 str. WS3294A]	VFG045915 (APECO78_08690) outer membrane usher protein [E.coli laminin-binding fimbriae (ELF) (CVF824)] [Escherichia coli O78:H18 str. WS3294A]	VFG045935 (APECO78_08695) fimbrial-like adhesin protein [E.coli laminin-binding fimbriae (ELF) (CVF824)] [Escherichia coli O78:H18 str. WS3294A]	VFG045983 (CDCO157_0108) hypothetical protein [Hemorrhagic E.coli pilus (HCP) (CVF825)] [Escherichia coli O157:H7 str. Xuzhou21]	VFG045827 (EC958_1421) hemolysin E [Hemolysin/cytolysin A (CVF750)] [Escherichia coli O25b:H4-ST131]				VFG045884 (ECH74115_1101) periplasmic pilus chaperone family protein [E.coli laminin-binding fimbriae (ELF) (CVF824)] [Escherichia coli O157:H7 str. EC4115]				VFG045881 (ECO55CA74_05725) chaperone [E.coli laminin-binding fimbriae (ELF) (CVF824)] [Escherichia coli O55:H7 str. RM12579]	VFG046031 (ECP_0106) type IV pilin biogenesis protein [Hemorrhagic E.coli pilus (HCP) (CVF825)] [Escherichia coli 536]	VFG045993 (ECP_0107) hypothetical protein [Hemorrhagic E.coli pilus (HCP) (CVF825)] [Escherichia coli 536]	VFG045956 (ECP_0108) major pilin subunit [Hemorrhagic E.coli pilus (HCP) (CVF825)] [Escherichia coli 536]	VFG043545_gi:218560235_ (ECS88_3547) lipoprotein NlpI [NlpI (AI331)] [Escherichia coli O45:K1:H7 str. S88]												VFG042095_gi:15832966_ (ECs3712) hypothetical protein [ETT2 (SS017)] [Escherichia coli O157:H7 str. Sakai]	VFG046001 (ETEC_0103) protein transport protein HofB [Hemorrhagic E.coli pilus (HCP) (CVF825)] [Escherichia coli O78:H11:K80 str. H10407]	VFG045896 (ETEC_1007) periplasmic pilin chaperone [E.coli laminin-binding fimbriae (ELF) (CVF824)] [Escherichia coli O78:H11:K80 str. H10407]	VFG045912 (ETEC_1008) fimbrial outer membrane usher protein [E.coli laminin-binding fimbriae (ELF) (CVF824)] [Escherichia coli O78:H11:K80 str. H10407]	VFG045932 (ETEC_1011) fimbrial precursor [E.coli laminin-binding fimbriae (ELF) (CVF824)] [Escherichia coli O78:H11:K80 str. H10407]		VFG045931 (EcE24377A_1056) fimbrial protein [E.coli laminin-binding fimbriae (ELF) (CVF824)] [Escherichia coli E24377A]		VFG045926 (O3M_16610) fimbrial-like adhesin protein [E.coli laminin-binding fimbriae (ELF) (CVF824)] [Escherichia coli O104:H4 str. 2009EL-2050]	VFG045906 (O3M_16615) outer membrane usher protein [E.coli laminin-binding fimbriae (ELF) (CVF824)] [Escherichia coli O104:H4 str. 2009EL-2050]		VFG045950 (O3M_20925) major pilin subunit [Hemorrhagic E.coli pilus (HCP) (CVF825)] [Escherichia coli O104:H4 str. 2009EL-2050]	VFG045987 (O3M_20930) hypothetical protein [Hemorrhagic E.coli pilus (HCP) (CVF825)] [Escherichia coli O104:H4 str. 2009EL-2050]		VFG045897 (UMNK88_1094) chaperone protein FocC [E.coli laminin-binding fimbriae (ELF) (CVF824)] [Escherichia coli UMNK88]	VFG045913 (UMNK88_1095) outer membrane usher protein FimD [E.coli laminin-binding fimbriae (ELF) (CVF824)] [Escherichia coli UMNK88]	VFG045933 (UMNK88_1096) hypothetical protein [E.coli laminin-binding fimbriae (ELF) (CVF824)] [Escherichia coli UMNK88]
ECL20013	VFG046044 (APECO78_03970) type IV pilin biogenesis protein [Hemorrhagic E.coli pilus (HCP) (CVF825)] [Escherichia coli O78:H18 str. WS3294A]	VFG046007 (APECO78_03975) hypothetical protein [Hemorrhagic E.coli pilus (HCP) (CVF825)] [Escherichia coli O78:H18 str. WS3294A]	VFG045899 (APECO78_08685) periplasmic pilin chaperone [E.coli laminin-binding fimbriae (ELF) (CVF824)] [Escherichia coli O78:H18 str. WS3294A]	VFG045915 (APECO78_08690) outer membrane usher protein [E.coli laminin-binding fimbriae (ELF) (CVF824)] [Escherichia coli O78:H18 str. WS3294A]	VFG045935 (APECO78_08695) fimbrial-like adhesin protein [E.coli laminin-binding fimbriae (ELF) (CVF824)] [Escherichia coli O78:H18 str. WS3294A]	VFG045983 (CDCO157_0108) hypothetical protein [Hemorrhagic E.coli pilus (HCP) (CVF825)] [Escherichia coli O157:H7 str. Xuzhou21]	VFG045827 (EC958_1421) hemolysin E [Hemolysin/cytolysin A (CVF750)] [Escherichia coli O25b:H4-ST131]	VFG045820 (EC958_4121) putative autotransporter [AIDA-I (CVF450)] [Escherichia coli O25b:H4-ST131]	VFG045826 (EC958_5138) Fluffing protein [Cah, AIDA-I type (CVF745)] [Escherichia coli O25b:H4-ST131]	VFG045862 (ECH74115_1100) fimbrial protein [E.coli laminin-binding fimbriae (ELF) (CVF824)] [Escherichia coli O157:H7 str. EC4115]	VFG045884 (ECH74115_1101) periplasmic pilus chaperone family protein [E.coli laminin-binding fimbriae (ELF) (CVF824)] [Escherichia coli O157:H7 str. EC4115]	VFG035720_gi:260842456_ (ECO103_0224) hypothetical protein [ACE T6SS (CVF736)] [Escherichia coli O103:H2 str. 12009]	VFG035721_gi:260866370_ (ECO111_0230) hypothetical protein [ACE T6SS (CVF736)] [Escherichia coli O111:H- str. 11128]	VFG045859 (ECO55CA74_05720) putative fimbrial-like adhesin protein [E.coli laminin-binding fimbriae (ELF) (CVF824)] [Escherichia coli O55:H7 str. RM12579]	VFG045881 (ECO55CA74_05725) chaperone [E.coli laminin-binding fimbriae (ELF) (CVF824)] [Escherichia coli O55:H7 str. RM12579]	VFG046031 (ECP_0106) type IV pilin biogenesis protein [Hemorrhagic E.coli pilus (HCP) (CVF825)] [Escherichia coli 536]	VFG045993 (ECP_0107) hypothetical protein [Hemorrhagic E.coli pilus (HCP) (CVF825)] [Escherichia coli 536]	VFG045956 (ECP_0108) major pilin subunit [Hemorrhagic E.coli pilus (HCP) (CVF825)] [Escherichia coli 536]	VFG043545_gi:218560235_ (ECS88_3547) lipoprotein NlpI [NlpI (AI331)] [Escherichia coli O45:K1:H7 str. S88]	VFG046082 (ECVR50_0238) hypothetical protein [ACE T6SS (CVF736)] [Escherichia coli VR50]	VFG046083 (ECVR50_0239) IcmF-related protein [ACE T6SS (CVF736)] [Escherichia coli VR50]	VFG046084 (ECVR50_0240) uncharacterized protein ImpA [ACE T6SS (CVF736)] [Escherichia coli VR50]	VFG046086 (ECVR50_0242) putative protease [ACE T6SS (CVF736)] [Escherichia coli VR50]	VFG046090 (ECVR50_0246) hypothetical protein [ACE T6SS (CVF736)] [Escherichia coli VR50]	VFG046091 (ECVR50_0247) hypothetical protein [ACE T6SS (CVF736)] [Escherichia coli VR50]	VFG046092 (ECVR50_0248) hypothetical protein [ACE T6SS (CVF736)] [Escherichia coli VR50]	VFG046093 (ECVR50_0249) hypothetical protein [ACE T6SS (CVF736)] [Escherichia coli VR50]	VFG046094 (ECVR50_0250) uncharacterized protein ImpC [ACE T6SS (CVF736)] [Escherichia coli VR50]	VFG046096 (ECVR50_0257) hypothetical protein [ACE T6SS (CVF736)] [Escherichia coli VR50]	VFG035711_gi:15829483_ (ECs0229) hypothetical protein [ACE T6SS (CVF736)] [Escherichia coli O157:H7 str. Sakai]	VFG042095_gi:15832966_ (ECs3712) hypothetical protein [ETT2 (SS017)] [Escherichia coli O157:H7 str. Sakai]	VFG046001 (ETEC_0103) protein transport protein HofB [Hemorrhagic E.coli pilus (HCP) (CVF825)] [Escherichia coli O78:H11:K80 str. H10407]	VFG045896 (ETEC_1007) periplasmic pilin chaperone [E.coli laminin-binding fimbriae (ELF) (CVF824)] [Escherichia coli O78:H11:K80 str. H10407]	VFG045912 (ETEC_1008) fimbrial outer membrane usher protein [E.coli laminin-binding fimbriae (ELF) (CVF824)] [Escherichia coli O78:H11:K80 str. H10407]	VFG045932 (ETEC_1011) fimbrial precursor [E.coli laminin-binding fimbriae (ELF) (CVF824)] [Escherichia coli O78:H11:K80 str. H10407]	VFG035728_gi:157155723_ (EcE24377A_0237) hypothetical protein [ACE T6SS (CVF736)] [Escherichia coli E24377A]	VFG045931 (EcE24377A_1056) fimbrial protein [E.coli laminin-binding fimbriae (ELF) (CVF824)] [Escherichia coli E24377A]	VFG035715_gi:291281048_ (G2583_0236) hypothetical protein [ACE T6SS (CVF736)] [Escherichia coli O55:H7 str. CB9615]	VFG045926 (O3M_16610) fimbrial-like adhesin protein [E.coli laminin-binding fimbriae (ELF) (CVF824)] [Escherichia coli O104:H4 str. 2009EL-2050]	VFG045906 (O3M_16615) outer membrane usher protein [E.coli laminin-binding fimbriae (ELF) (CVF824)] [Escherichia coli O104:H4 str. 2009EL-2050]	VFG035722_gi:410484142_ (O3M_20335) type VI secretion system protein ImpG [ACE T6SS (CVF736)] [Escherichia coli O104:H4 str. 2009EL-2050]	VFG045950 (O3M_20925) major pilin subunit [Hemorrhagic E.coli pilus (HCP) (CVF825)] [Escherichia coli O104:H4 str. 2009EL-2050]	VFG045987 (O3M_20930) hypothetical protein [Hemorrhagic E.coli pilus (HCP) (CVF825)] [Escherichia coli O104:H4 str. 2009EL-2050]	VFG045875 (UMNK88_1093) major type 1 subunit fimbrin FimA [E.coli laminin-binding fimbriae (ELF) (CVF824)] [Escherichia coli UMNK88]	VFG045897 (UMNK88_1094) chaperone protein FocC [E.coli laminin-binding fimbriae (ELF) (CVF824)] [Escherichia coli UMNK88]	VFG045913 (UMNK88_1095) outer membrane usher protein FimD [E.coli laminin-binding fimbriae (ELF) (CVF824)] [Escherichia coli UMNK88]	VFG045933 (UMNK88_1096) hypothetical protein [E.coli laminin-binding fimbriae (ELF) (CVF824)] [Escherichia coli UMNK88]	VFG035729_gi:386612389_ (UMNK88_238) hypothetical protein [ACE T6SS (CVF736)] [Escherichia coli UMNK88]	VFG035710_gi:15799909_ (Z0260) hypothetical protein [EHS (SS185)] [Escherichia coli O157:H7 str. EDL933]
ECL20014	VFG046044 (APECO78_03970) type IV pilin biogenesis protein [Hemorrhagic E.coli pilus (HCP) (CVF825)] [Escherichia coli O78:H18 str. WS3294A]	VFG046007 (APECO78_03975) hypothetical protein [Hemorrhagic E.coli pilus (HCP) (CVF825)] [Escherichia coli O78:H18 str. WS3294A]	VFG045899 (APECO78_08685) periplasmic pilin chaperone [E.coli laminin-binding fimbriae (ELF) (CVF824)] [Escherichia coli O78:H18 str. WS3294A]	VFG045915 (APECO78_08690) outer membrane usher protein [E.coli laminin-binding fimbriae (ELF) (CVF824)] [Escherichia coli O78:H18 str. WS3294A]	VFG045935 (APECO78_08695) fimbrial-like adhesin protein [E.coli laminin-binding fimbriae (ELF) (CVF824)] [Escherichia coli O78:H18 str. WS3294A]	VFG045983 (CDCO157_0108) hypothetical protein [Hemorrhagic E.coli pilus (HCP) (CVF825)] [Escherichia coli O157:H7 str. Xuzhou21]	VFG045827 (EC958_1421) hemolysin E [Hemolysin/cytolysin A (CVF750)] [Escherichia coli O25b:H4-ST131]	VFG045820 (EC958_4121) putative autotransporter [AIDA-I (CVF450)] [Escherichia coli O25b:H4-ST131]	VFG045826 (EC958_5138) Fluffing protein [Cah, AIDA-I type (CVF745)] [Escherichia coli O25b:H4-ST131]	VFG045862 (ECH74115_1100) fimbrial protein [E.coli laminin-binding fimbriae (ELF) (CVF824)] [Escherichia coli O157:H7 str. EC4115]	VFG045884 (ECH74115_1101) periplasmic pilus chaperone family protein [E.coli laminin-binding fimbriae (ELF) (CVF824)] [Escherichia coli O157:H7 str. EC4115]	VFG035720_gi:260842456_ (ECO103_0224) hypothetical protein [ACE T6SS (CVF736)] [Escherichia coli O103:H2 str. 12009]	VFG035721_gi:260866370_ (ECO111_0230) hypothetical protein [ACE T6SS (CVF736)] [Escherichia coli O111:H- str. 11128]	VFG045859 (ECO55CA74_05720) putative fimbrial-like adhesin protein [E.coli laminin-binding fimbriae (ELF) (CVF824)] [Escherichia coli O55:H7 str. RM12579]	VFG045881 (ECO55CA74_05725) chaperone [E.coli laminin-binding fimbriae (ELF) (CVF824)] [Escherichia coli O55:H7 str. RM12579]	VFG046031 (ECP_0106) type IV pilin biogenesis protein [Hemorrhagic E.coli pilus (HCP) (CVF825)] [Escherichia coli 536]	VFG045993 (ECP_0107) hypothetical protein [Hemorrhagic E.coli pilus (HCP) (CVF825)] [Escherichia coli 536]	VFG045956 (ECP_0108) major pilin subunit [Hemorrhagic E.coli pilus (HCP) (CVF825)] [Escherichia coli 536]	VFG043545_gi:218560235_ (ECS88_3547) lipoprotein NlpI [NlpI (AI331)] [Escherichia coli O45:K1:H7 str. S88]	VFG046082 (ECVR50_0238) hypothetical protein [ACE T6SS (CVF736)] [Escherichia coli VR50]	VFG046083 (ECVR50_0239) IcmF-related protein [ACE T6SS (CVF736)] [Escherichia coli VR50]	VFG046084 (ECVR50_0240) uncharacterized protein ImpA [ACE T6SS (CVF736)] [Escherichia coli VR50]	VFG046086 (ECVR50_0242) putative protease [ACE T6SS (CVF736)] [Escherichia coli VR50]	VFG046090 (ECVR50_0246) hypothetical protein [ACE T6SS (CVF736)] [Escherichia coli VR50]	VFG046091 (ECVR50_0247) hypothetical protein [ACE T6SS (CVF736)] [Escherichia coli VR50]	VFG046092 (ECVR50_0248) hypothetical protein [ACE T6SS (CVF736)] [Escherichia coli VR50]	VFG046093 (ECVR50_0249) hypothetical protein [ACE T6SS (CVF736)] [Escherichia coli VR50]	VFG046094 (ECVR50_0250) uncharacterized protein ImpC [ACE T6SS (CVF736)] [Escherichia coli VR50]	VFG046096 (ECVR50_0257) hypothetical protein [ACE T6SS (CVF736)] [Escherichia coli VR50]	VFG035711_gi:15829483_ (ECs0229) hypothetical protein [ACE T6SS (CVF736)] [Escherichia coli O157:H7 str. Sakai]	VFG042095_gi:15832966_ (ECs3712) hypothetical protein [ETT2 (SS017)] [Escherichia coli O157:H7 str. Sakai]	VFG046001 (ETEC_0103) protein transport protein HofB [Hemorrhagic E.coli pilus (HCP) (CVF825)] [Escherichia coli O78:H11:K80 str. H10407]	VFG045896 (ETEC_1007) periplasmic pilin chaperone [E.coli laminin-binding fimbriae (ELF) (CVF824)] [Escherichia coli O78:H11:K80 str. H10407]	VFG045912 (ETEC_1008) fimbrial outer membrane usher protein [E.coli laminin-binding fimbriae (ELF) (CVF824)] [Escherichia coli O78:H11:K80 str. H10407]	VFG045932 (ETEC_1011) fimbrial precursor [E.coli laminin-binding fimbriae (ELF) (CVF824)] [Escherichia coli O78:H11:K80 str. H10407]	VFG035728_gi:157155723_ (EcE24377A_0237) hypothetical protein [ACE T6SS (CVF736)] [Escherichia coli E24377A]	VFG045931 (EcE24377A_1056) fimbrial protein [E.coli laminin-binding fimbriae (ELF) (CVF824)] [Escherichia coli E24377A]	VFG035715_gi:291281048_ (G2583_0236) hypothetical protein [ACE T6SS (CVF736)] [Escherichia coli O55:H7 str. CB9615]	VFG045926 (O3M_16610) fimbrial-like adhesin protein [E.coli laminin-binding fimbriae (ELF) (CVF824)] [Escherichia coli O104:H4 str. 2009EL-2050]	VFG045906 (O3M_16615) outer membrane usher protein [E.coli laminin-binding fimbriae (ELF) (CVF824)] [Escherichia coli O104:H4 str. 2009EL-2050]	VFG035722_gi:410484142_ (O3M_20335) type VI secretion system protein ImpG [ACE T6SS (CVF736)] [Escherichia coli O104:H4 str. 2009EL-2050]	VFG045950 (O3M_20925) major pilin subunit [Hemorrhagic E.coli pilus (HCP) (CVF825)] [Escherichia coli O104:H4 str. 2009EL-2050]	VFG045987 (O3M_20930) hypothetical protein [Hemorrhagic E.coli pilus (HCP) (CVF825)] [Escherichia coli O104:H4 str. 2009EL-2050]	VFG045875 (UMNK88_1093) major type 1 subunit fimbrin FimA [E.coli laminin-binding fimbriae (ELF) (CVF824)] [Escherichia coli UMNK88]	VFG045897 (UMNK88_1094) chaperone protein FocC [E.coli laminin-binding fimbriae (ELF) (CVF824)] [Escherichia coli UMNK88]	VFG045913 (UMNK88_1095) outer membrane usher protein FimD [E.coli laminin-binding fimbriae (ELF) (CVF824)] [Escherichia coli UMNK88]	VFG045933 (UMNK88_1096) hypothetical protein [E.coli laminin-binding fimbriae (ELF) (CVF824)] [Escherichia coli UMNK88]	VFG035729_gi:386612389_ (UMNK88_238) hypothetical protein [ACE T6SS (CVF736)] [Escherichia coli UMNK88]	VFG035710_gi:15799909_ (Z0260) hypothetical protein [EHS (SS185)] [Escherichia coli O157:H7 str. EDL933]
ECL20015	VFG046044 (APECO78_03970) type IV pilin biogenesis protein [Hemorrhagic E.coli pilus (HCP) (CVF825)] [Escherichia coli O78:H18 str. WS3294A]	VFG046007 (APECO78_03975) hypothetical protein [Hemorrhagic E.coli pilus (HCP) (CVF825)] [Escherichia coli O78:H18 str. WS3294A]	VFG045899 (APECO78_08685) periplasmic pilin chaperone [E.coli laminin-binding fimbriae (ELF) (CVF824)] [Escherichia coli O78:H18 str. WS3294A]	VFG045915 (APECO78_08690) outer membrane usher protein [E.coli laminin-binding fimbriae (ELF) (CVF824)] [Escherichia coli O78:H18 str. WS3294A]	VFG045935 (APECO78_08695) fimbrial-like adhesin protein [E.coli laminin-binding fimbriae (ELF) (CVF824)] [Escherichia coli O78:H18 str. WS3294A]	VFG045983 (CDCO157_0108) hypothetical protein [Hemorrhagic E.coli pilus (HCP) (CVF825)] [Escherichia coli O157:H7 str. Xuzhou21]	VFG045827 (EC958_1421) hemolysin E [Hemolysin/cytolysin A (CVF750)] [Escherichia coli O25b:H4-ST131]	VFG045820 (EC958_4121) putative autotransporter [AIDA-I (CVF450)] [Escherichia coli O25b:H4-ST131]	VFG045826 (EC958_5138) Fluffing protein [Cah, AIDA-I type (CVF745)] [Escherichia coli O25b:H4-ST131]	VFG045862 (ECH74115_1100) fimbrial protein [E.coli laminin-binding fimbriae (ELF) (CVF824)] [Escherichia coli O157:H7 str. EC4115]	VFG045884 (ECH74115_1101) periplasmic pilus chaperone family protein [E.coli laminin-binding fimbriae (ELF) (CVF824)] [Escherichia coli O157:H7 str. EC4115]	VFG035720_gi:260842456_ (ECO103_0224) hypothetical protein [ACE T6SS (CVF736)] [Escherichia coli O103:H2 str. 12009]	VFG035721_gi:260866370_ (ECO111_0230) hypothetical protein [ACE T6SS (CVF736)] [Escherichia coli O111:H- str. 11128]	VFG045859 (ECO55CA74_05720) putative fimbrial-like adhesin protein [E.coli laminin-binding fimbriae (ELF) (CVF824)] [Escherichia coli O55:H7 str. RM12579]	VFG045881 (ECO55CA74_05725) chaperone [E.coli laminin-binding fimbriae (ELF) (CVF824)] [Escherichia coli O55:H7 str. RM12579]	VFG046031 (ECP_0106) type IV pilin biogenesis protein [Hemorrhagic E.coli pilus (HCP) (CVF825)] [Escherichia coli 536]	VFG045993 (ECP_0107) hypothetical protein [Hemorrhagic E.coli pilus (HCP) (CVF825)] [Escherichia coli 536]	VFG045956 (ECP_0108) major pilin subunit [Hemorrhagic E.coli pilus (HCP) (CVF825)] [Escherichia coli 536]	VFG043545_gi:218560235_ (ECS88_3547) lipoprotein NlpI [NlpI (AI331)] [Escherichia coli O45:K1:H7 str. S88]	VFG046082 (ECVR50_0238) hypothetical protein [ACE T6SS (CVF736)] [Escherichia coli VR50]	VFG046083 (ECVR50_0239) IcmF-related protein [ACE T6SS (CVF736)] [Escherichia coli VR50]	VFG046084 (ECVR50_0240) uncharacterized protein ImpA [ACE T6SS (CVF736)] [Escherichia coli VR50]	VFG046086 (ECVR50_0242) putative protease [ACE T6SS (CVF736)] [Escherichia coli VR50]	VFG046090 (ECVR50_0246) hypothetical protein [ACE T6SS (CVF736)] [Escherichia coli VR50]	VFG046091 (ECVR50_0247) hypothetical protein [ACE T6SS (CVF736)] [Escherichia coli VR50]	VFG046092 (ECVR50_0248) hypothetical protein [ACE T6SS (CVF736)] [Escherichia coli VR50]	VFG046093 (ECVR50_0249) hypothetical protein [ACE T6SS (CVF736)] [Escherichia coli VR50]	VFG046094 (ECVR50_0250) uncharacterized protein ImpC [ACE T6SS (CVF736)] [Escherichia coli VR50]	VFG046096 (ECVR50_0257) hypothetical protein [ACE T6SS (CVF736)] [Escherichia coli VR50]	VFG035711_gi:15829483_ (ECs0229) hypothetical protein [ACE T6SS (CVF736)] [Escherichia coli O157:H7 str. Sakai]	VFG042095_gi:15832966_ (ECs3712) hypothetical protein [ETT2 (SS017)] [Escherichia coli O157:H7 str. Sakai]	VFG046001 (ETEC_0103) protein transport protein HofB [Hemorrhagic E.coli pilus (HCP) (CVF825)] [Escherichia coli O78:H11:K80 str. H10407]	VFG045896 (ETEC_1007) periplasmic pilin chaperone [E.coli laminin-binding fimbriae (ELF) (CVF824)] [Escherichia coli O78:H11:K80 str. H10407]	VFG045912 (ETEC_1008) fimbrial outer membrane usher protein [E.coli laminin-binding fimbriae (ELF) (CVF824)] [Escherichia coli O78:H11:K80 str. H10407]	VFG045932 (ETEC_1011) fimbrial precursor [E.coli laminin-binding fimbriae (ELF) (CVF824)] [Escherichia coli O78:H11:K80 str. H10407]	VFG035728_gi:157155723_ (EcE24377A_0237) hypothetical protein [ACE T6SS (CVF736)] [Escherichia coli E24377A]	VFG045931 (EcE24377A_1056) fimbrial protein [E.coli laminin-binding fimbriae (ELF) (CVF824)] [Escherichia coli E24377A]	VFG035715_gi:291281048_ (G2583_0236) hypothetical protein [ACE T6SS (CVF736)] [Escherichia coli O55:H7 str. CB9615]	VFG045926 (O3M_16610) fimbrial-like adhesin protein [E.coli laminin-binding fimbriae (ELF) (CVF824)] [Escherichia coli O104:H4 str. 2009EL-2050]	VFG045906 (O3M_16615) outer membrane usher protein [E.coli laminin-binding fimbriae (ELF) (CVF824)] [Escherichia coli O104:H4 str. 2009EL-2050]	VFG035722_gi:410484142_ (O3M_20335) type VI secretion system protein ImpG [ACE T6SS (CVF736)] [Escherichia coli O104:H4 str. 2009EL-2050]	VFG045950 (O3M_20925) major pilin subunit [Hemorrhagic E.coli pilus (HCP) (CVF825)] [Escherichia coli O104:H4 str. 2009EL-2050]	VFG045987 (O3M_20930) hypothetical protein [Hemorrhagic E.coli pilus (HCP) (CVF825)] [Escherichia coli O104:H4 str. 2009EL-2050]	VFG045875 (UMNK88_1093) major type 1 subunit fimbrin FimA [E.coli laminin-binding fimbriae (ELF) (CVF824)] [Escherichia coli UMNK88]	VFG045897 (UMNK88_1094) chaperone protein FocC [E.coli laminin-binding fimbriae (ELF) (CVF824)] [Escherichia coli UMNK88]	VFG045913 (UMNK88_1095) outer membrane usher protein FimD [E.coli laminin-binding fimbriae (ELF) (CVF824)] [Escherichia coli UMNK88]	VFG045933 (UMNK88_1096) hypothetical protein [E.coli laminin-binding fimbriae (ELF) (CVF824)] [Escherichia coli UMNK88]	VFG035729_gi:386612389_ (UMNK88_238) hypothetical protein [ACE T6SS (CVF736)] [Escherichia coli UMNK88]	VFG035710_gi:15799909_ (Z0260) hypothetical protein [EHS (SS185)] [Escherichia coli O157:H7 str. EDL933]
ECL20018	VFG046044 (APECO78_03970) type IV pilin biogenesis protein [Hemorrhagic E.coli pilus (HCP) (CVF825)] [Escherichia coli O78:H18 str. WS3294A]	VFG046007 (APECO78_03975) hypothetical protein [Hemorrhagic E.coli pilus (HCP) (CVF825)] [Escherichia coli O78:H18 str. WS3294A]	VFG045899 (APECO78_08685) periplasmic pilin chaperone [E.coli laminin-binding fimbriae (ELF) (CVF824)] [Escherichia coli O78:H18 str. WS3294A]	VFG045915 (APECO78_08690) outer membrane usher protein [E.coli laminin-binding fimbriae (ELF) (CVF824)] [Escherichia coli O78:H18 str. WS3294A]	VFG045935 (APECO78_08695) fimbrial-like adhesin protein [E.coli laminin-binding fimbriae (ELF) (CVF824)] [Escherichia coli O78:H18 str. WS3294A]	VFG045983 (CDCO157_0108) hypothetical protein [Hemorrhagic E.coli pilus (HCP) (CVF825)] [Escherichia coli O157:H7 str. Xuzhou21]	VFG045827 (EC958_1421) hemolysin E [Hemolysin/cytolysin A (CVF750)] [Escherichia coli O25b:H4-ST131]	VFG045820 (EC958_4121) putative autotransporter [AIDA-I (CVF450)] [Escherichia coli O25b:H4-ST131]	VFG045826 (EC958_5138) Fluffing protein [Cah, AIDA-I type (CVF745)] [Escherichia coli O25b:H4-ST131]	VFG045862 (ECH74115_1100) fimbrial protein [E.coli laminin-binding fimbriae (ELF) (CVF824)] [Escherichia coli O157:H7 str. EC4115]	VFG045884 (ECH74115_1101) periplasmic pilus chaperone family protein [E.coli laminin-binding fimbriae (ELF) (CVF824)] [Escherichia coli O157:H7 str. EC4115]	VFG035720_gi:260842456_ (ECO103_0224) hypothetical protein [ACE T6SS (CVF736)] [Escherichia coli O103:H2 str. 12009]	VFG035721_gi:260866370_ (ECO111_0230) hypothetical protein [ACE T6SS (CVF736)] [Escherichia coli O111:H- str. 11128]	VFG045859 (ECO55CA74_05720) putative fimbrial-like adhesin protein [E.coli laminin-binding fimbriae (ELF) (CVF824)] [Escherichia coli O55:H7 str. RM12579]	VFG045881 (ECO55CA74_05725) chaperone [E.coli laminin-binding fimbriae (ELF) (CVF824)] [Escherichia coli O55:H7 str. RM12579]	VFG046031 (ECP_0106) type IV pilin biogenesis protein [Hemorrhagic E.coli pilus (HCP) (CVF825)] [Escherichia coli 536]	VFG045993 (ECP_0107) hypothetical protein [Hemorrhagic E.coli pilus (HCP) (CVF825)] [Escherichia coli 536]	VFG045956 (ECP_0108) major pilin subunit [Hemorrhagic E.coli pilus (HCP) (CVF825)] [Escherichia coli 536]	VFG043545_gi:218560235_ (ECS88_3547) lipoprotein NlpI [NlpI (AI331)] [Escherichia coli O45:K1:H7 str. S88]	VFG046082 (ECVR50_0238) hypothetical protein [ACE T6SS (CVF736)] [Escherichia coli VR50]	VFG046083 (ECVR50_0239) IcmF-related protein [ACE T6SS (CVF736)] [Escherichia coli VR50]	VFG046084 (ECVR50_0240) uncharacterized protein ImpA [ACE T6SS (CVF736)] [Escherichia coli VR50]	VFG046086 (ECVR50_0242) putative protease [ACE T6SS (CVF736)] [Escherichia coli VR50]	VFG046090 (ECVR50_0246) hypothetical protein [ACE T6SS (CVF736)] [Escherichia coli VR50]	VFG046091 (ECVR50_0247) hypothetical protein [ACE T6SS (CVF736)] [Escherichia coli VR50]	VFG046092 (ECVR50_0248) hypothetical protein [ACE T6SS (CVF736)] [Escherichia coli VR50]	VFG046093 (ECVR50_0249) hypothetical protein [ACE T6SS (CVF736)] [Escherichia coli VR50]	VFG046094 (ECVR50_0250) uncharacterized protein ImpC [ACE T6SS (CVF736)] [Escherichia coli VR50]	VFG046096 (ECVR50_0257) hypothetical protein [ACE T6SS (CVF736)] [Escherichia coli VR50]	VFG035711_gi:15829483_ (ECs0229) hypothetical protein [ACE T6SS (CVF736)] [Escherichia coli O157:H7 str. Sakai]	VFG042095_gi:15832966_ (ECs3712) hypothetical protein [ETT2 (SS017)] [Escherichia coli O157:H7 str. Sakai]	VFG046001 (ETEC_0103) protein transport protein HofB [Hemorrhagic E.coli pilus (HCP) (CVF825)] [Escherichia coli O78:H11:K80 str. H10407]	VFG045896 (ETEC_1007) periplasmic pilin chaperone [E.coli laminin-binding fimbriae (ELF) (CVF824)] [Escherichia coli O78:H11:K80 str. H10407]	VFG045912 (ETEC_1008) fimbrial outer membrane usher protein [E.coli laminin-binding fimbriae (ELF) (CVF824)] [Escherichia coli O78:H11:K80 str. H10407]	VFG045932 (ETEC_1011) fimbrial precursor [E.coli laminin-binding fimbriae (ELF) (CVF824)] [Escherichia coli O78:H11:K80 str. H10407]	VFG035728_gi:157155723_ (EcE24377A_0237) hypothetical protein [ACE T6SS (CVF736)] [Escherichia coli E24377A]	VFG045931 (EcE24377A_1056) fimbrial protein [E.coli laminin-binding fimbriae (ELF) (CVF824)] [Escherichia coli E24377A]	VFG035715_gi:291281048_ (G2583_0236) hypothetical protein [ACE T6SS (CVF736)] [Escherichia coli O55:H7 str. CB9615]	VFG045926 (O3M_16610) fimbrial-like adhesin protein [E.coli laminin-binding fimbriae (ELF) (CVF824)] [Escherichia coli O104:H4 str. 2009EL-2050]	VFG045906 (O3M_16615) outer membrane usher protein [E.coli laminin-binding fimbriae (ELF) (CVF824)] [Escherichia coli O104:H4 str. 2009EL-2050]	VFG035722_gi:410484142_ (O3M_20335) type VI secretion system protein ImpG [ACE T6SS (CVF736)] [Escherichia coli O104:H4 str. 2009EL-2050]	VFG045950 (O3M_20925) major pilin subunit [Hemorrhagic E.coli pilus (HCP) (CVF825)] [Escherichia coli O104:H4 str. 2009EL-2050]	VFG045987 (O3M_20930) hypothetical protein [Hemorrhagic E.coli pilus (HCP) (CVF825)] [Escherichia coli O104:H4 str. 2009EL-2050]	VFG045875 (UMNK88_1093) major type 1 subunit fimbrin FimA [E.coli laminin-binding fimbriae (ELF) (CVF824)] [Escherichia coli UMNK88]	VFG045897 (UMNK88_1094) chaperone protein FocC [E.coli laminin-binding fimbriae (ELF) (CVF824)] [Escherichia coli UMNK88]	VFG045913 (UMNK88_1095) outer membrane usher protein FimD [E.coli laminin-binding fimbriae (ELF) (CVF824)] [Escherichia coli UMNK88]	VFG045933 (UMNK88_1096) hypothetical protein [E.coli laminin-binding fimbriae (ELF) (CVF824)] [Escherichia coli UMNK88]	VFG035729_gi:386612389_ (UMNK88_238) hypothetical protein [ACE T6SS (CVF736)] [Escherichia coli UMNK88]	VFG035710_gi:15799909_ (Z0260) hypothetical protein [EHS (SS185)] [Escherichia coli O157:H7 str. EDL933]
ECL20209	VFG046044 (APECO78_03970) type IV pilin biogenesis protein [Hemorrhagic E.coli pilus (HCP) (CVF825)] [Escherichia coli O78:H18 str. WS3294A]	VFG046007 (APECO78_03975) hypothetical protein [Hemorrhagic E.coli pilus (HCP) (CVF825)] [Escherichia coli O78:H18 str. WS3294A]	VFG045899 (APECO78_08685) periplasmic pilin chaperone [E.coli laminin-binding fimbriae (ELF) (CVF824)] [Escherichia coli O78:H18 str. WS3294A]	VFG045915 (APECO78_08690) outer membrane usher protein [E.coli laminin-binding fimbriae (ELF) (CVF824)] [Escherichia coli O78:H18 str. WS3294A]	VFG045935 (APECO78_08695) fimbrial-like adhesin protein [E.coli laminin-binding fimbriae (ELF) (CVF824)] [Escherichia coli O78:H18 str. WS3294A]	VFG045983 (CDCO157_0108) hypothetical protein [Hemorrhagic E.coli pilus (HCP) (CVF825)] [Escherichia coli O157:H7 str. Xuzhou21]	VFG045827 (EC958_1421) hemolysin E [Hemolysin/cytolysin A (CVF750)] [Escherichia coli O25b:H4-ST131]		VFG045826 (EC958_5138) Fluffing protein [Cah, AIDA-I type (CVF745)] [Escherichia coli O25b:H4-ST131]	VFG045862 (ECH74115_1100) fimbrial protein [E.coli laminin-binding fimbriae (ELF) (CVF824)] [Escherichia coli O157:H7 str. EC4115]	VFG045884 (ECH74115_1101) periplasmic pilus chaperone family protein [E.coli laminin-binding fimbriae (ELF) (CVF824)] [Escherichia coli O157:H7 str. EC4115]	VFG035720_gi:260842456_ (ECO103_0224) hypothetical protein [ACE T6SS (CVF736)] [Escherichia coli O103:H2 str. 12009]	VFG035721_gi:260866370_ (ECO111_0230) hypothetical protein [ACE T6SS (CVF736)] [Escherichia coli O111:H- str. 11128]	VFG045859 (ECO55CA74_05720) putative fimbrial-like adhesin protein [E.coli laminin-binding fimbriae (ELF) (CVF824)] [Escherichia coli O55:H7 str. RM12579]	VFG045881 (ECO55CA74_05725) chaperone [E.coli laminin-binding fimbriae (ELF) (CVF824)] [Escherichia coli O55:H7 str. RM12579]	VFG046031 (ECP_0106) type IV pilin biogenesis protein [Hemorrhagic E.coli pilus (HCP) (CVF825)] [Escherichia coli 536]	VFG045993 (ECP_0107) hypothetical protein [Hemorrhagic E.coli pilus (HCP) (CVF825)] [Escherichia coli 536]	VFG045956 (ECP_0108) major pilin subunit [Hemorrhagic E.coli pilus (HCP) (CVF825)] [Escherichia coli 536]	VFG043545_gi:218560235_ (ECS88_3547) lipoprotein NlpI [NlpI (AI331)] [Escherichia coli O45:K1:H7 str. S88]	VFG046082 (ECVR50_0238) hypothetical protein [ACE T6SS (CVF736)] [Escherichia coli VR50]	VFG046083 (ECVR50_0239) IcmF-related protein [ACE T6SS (CVF736)] [Escherichia coli VR50]	VFG046084 (ECVR50_0240) uncharacterized protein ImpA [ACE T6SS (CVF736)] [Escherichia coli VR50]	VFG046086 (ECVR50_0242) putative protease [ACE T6SS (CVF736)] [Escherichia coli VR50]	VFG046090 (ECVR50_0246) hypothetical protein [ACE T6SS (CVF736)] [Escherichia coli VR50]	VFG046091 (ECVR50_0247) hypothetical protein [ACE T6SS (CVF736)] [Escherichia coli VR50]	VFG046092 (ECVR50_0248) hypothetical protein [ACE T6SS (CVF736)] [Escherichia coli VR50]	VFG046093 (ECVR50_0249) hypothetical protein [ACE T6SS (CVF736)] [Escherichia coli VR50]	VFG046094 (ECVR50_0250) uncharacterized protein ImpC [ACE T6SS (CVF736)] [Escherichia coli VR50]	VFG046096 (ECVR50_0257) hypothetical protein [ACE T6SS (CVF736)] [Escherichia coli VR50]	VFG035711_gi:15829483_ (ECs0229) hypothetical protein [ACE T6SS (CVF736)] [Escherichia coli O157:H7 str. Sakai]	VFG042095_gi:15832966_ (ECs3712) hypothetical protein [ETT2 (SS017)] [Escherichia coli O157:H7 str. Sakai]	VFG046001 (ETEC_0103) protein transport protein HofB [Hemorrhagic E.coli pilus (HCP) (CVF825)] [Escherichia coli O78:H11:K80 str. H10407]	VFG045896 (ETEC_1007) periplasmic pilin chaperone [E.coli laminin-binding fimbriae (ELF) (CVF824)] [Escherichia coli O78:H11:K80 str. H10407]	VFG045912 (ETEC_1008) fimbrial outer membrane usher protein [E.coli laminin-binding fimbriae (ELF) (CVF824)] [Escherichia coli O78:H11:K80 str. H10407]	VFG045932 (ETEC_1011) fimbrial precursor [E.coli laminin-binding fimbriae (ELF) (CVF824)] [Escherichia coli O78:H11:K80 str. H10407]	VFG035728_gi:157155723_ (EcE24377A_0237) hypothetical protein [ACE T6SS (CVF736)] [Escherichia coli E24377A]	VFG045931 (EcE24377A_1056) fimbrial protein [E.coli laminin-binding fimbriae (ELF) (CVF824)] [Escherichia coli E24377A]	VFG035715_gi:291281048_ (G2583_0236) hypothetical protein [ACE T6SS (CVF736)] [Escherichia coli O55:H7 str. CB9615]	VFG045926 (O3M_16610) fimbrial-like adhesin protein [E.coli laminin-binding fimbriae (ELF) (CVF824)] [Escherichia coli O104:H4 str. 2009EL-2050]	VFG045906 (O3M_16615) outer membrane usher protein [E.coli laminin-binding fimbriae (ELF) (CVF824)] [Escherichia coli O104:H4 str. 2009EL-2050]	VFG035722_gi:410484142_ (O3M_20335) type VI secretion system protein ImpG [ACE T6SS (CVF736)] [Escherichia coli O104:H4 str. 2009EL-2050]	VFG045950 (O3M_20925) major pilin subunit [Hemorrhagic E.coli pilus (HCP) (CVF825)] [Escherichia coli O104:H4 str. 2009EL-2050]	VFG045987 (O3M_20930) hypothetical protein [Hemorrhagic E.coli pilus (HCP) (CVF825)] [Escherichia coli O104:H4 str. 2009EL-2050]	VFG045875 (UMNK88_1093) major type 1 subunit fimbrin FimA [E.coli laminin-binding fimbriae (ELF) (CVF824)] [Escherichia coli UMNK88]	VFG045897 (UMNK88_1094) chaperone protein FocC [E.coli laminin-binding fimbriae (ELF) (CVF824)] [Escherichia coli UMNK88]	VFG045913 (UMNK88_1095) outer membrane usher protein FimD [E.coli laminin-binding fimbriae (ELF) (CVF824)] [Escherichia coli UMNK88]	VFG045933 (UMNK88_1096) hypothetical protein [E.coli laminin-binding fimbriae (ELF) (CVF824)] [Escherichia coli UMNK88]	VFG035729_gi:386612389_ (UMNK88_238) hypothetical protein [ACE T6SS (CVF736)] [Escherichia coli UMNK88]	VFG035710_gi:15799909_ (Z0260) hypothetical protein [EHS (SS185)] [Escherichia coli O157:H7 str. EDL933]
ECL20212	VFG046044 (APECO78_03970) type IV pilin biogenesis protein [Hemorrhagic E.coli pilus (HCP) (CVF825)] [Escherichia coli O78:H18 str. WS3294A]	VFG046007 (APECO78_03975) hypothetical protein [Hemorrhagic E.coli pilus (HCP) (CVF825)] [Escherichia coli O78:H18 str. WS3294A]	VFG045899 (APECO78_08685) periplasmic pilin chaperone [E.coli laminin-binding fimbriae (ELF) (CVF824)] [Escherichia coli O78:H18 str. WS3294A]	VFG045915 (APECO78_08690) outer membrane usher protein [E.coli laminin-binding fimbriae (ELF) (CVF824)] [Escherichia coli O78:H18 str. WS3294A]	VFG045935 (APECO78_08695) fimbrial-like adhesin protein [E.coli laminin-binding fimbriae (ELF) (CVF824)] [Escherichia coli O78:H18 str. WS3294A]	VFG045983 (CDCO157_0108) hypothetical protein [Hemorrhagic E.coli pilus (HCP) (CVF825)] [Escherichia coli O157:H7 str. Xuzhou21]	VFG045827 (EC958_1421) hemolysin E [Hemolysin/cytolysin A (CVF750)] [Escherichia coli O25b:H4-ST131]			VFG045862 (ECH74115_1100) fimbrial protein [E.coli laminin-binding fimbriae (ELF) (CVF824)] [Escherichia coli O157:H7 str. EC4115]	VFG045884 (ECH74115_1101) periplasmic pilus chaperone family protein [E.coli laminin-binding fimbriae (ELF) (CVF824)] [Escherichia coli O157:H7 str. EC4115]	VFG035720_gi:260842456_ (ECO103_0224) hypothetical protein [ACE T6SS (CVF736)] [Escherichia coli O103:H2 str. 12009]	VFG035721_gi:260866370_ (ECO111_0230) hypothetical protein [ACE T6SS (CVF736)] [Escherichia coli O111:H- str. 11128]	VFG045859 (ECO55CA74_05720) putative fimbrial-like adhesin protein [E.coli laminin-binding fimbriae (ELF) (CVF824)] [Escherichia coli O55:H7 str. RM12579]	VFG045881 (ECO55CA74_05725) chaperone [E.coli laminin-binding fimbriae (ELF) (CVF824)] [Escherichia coli O55:H7 str. RM12579]	VFG046031 (ECP_0106) type IV pilin biogenesis protein [Hemorrhagic E.coli pilus (HCP) (CVF825)] [Escherichia coli 536]	VFG045993 (ECP_0107) hypothetical protein [Hemorrhagic E.coli pilus (HCP) (CVF825)] [Escherichia coli 536]	VFG045956 (ECP_0108) major pilin subunit [Hemorrhagic E.coli pilus (HCP) (CVF825)] [Escherichia coli 536]	VFG043545_gi:218560235_ (ECS88_3547) lipoprotein NlpI [NlpI (AI331)] [Escherichia coli O45:K1:H7 str. S88]	VFG046082 (ECVR50_0238) hypothetical protein [ACE T6SS (CVF736)] [Escherichia coli VR50]	VFG046083 (ECVR50_0239) IcmF-related protein [ACE T6SS (CVF736)] [Escherichia coli VR50]	VFG046084 (ECVR50_0240) uncharacterized protein ImpA [ACE T6SS (CVF736)] [Escherichia coli VR50]	VFG046086 (ECVR50_0242) putative protease [ACE T6SS (CVF736)] [Escherichia coli VR50]	VFG046090 (ECVR50_0246) hypothetical protein [ACE T6SS (CVF736)] [Escherichia coli VR50]	VFG046091 (ECVR50_0247) hypothetical protein [ACE T6SS (CVF736)] [Escherichia coli VR50]	VFG046092 (ECVR50_0248) hypothetical protein [ACE T6SS (CVF736)] [Escherichia coli VR50]	VFG046093 (ECVR50_0249) hypothetical protein [ACE T6SS (CVF736)] [Escherichia coli VR50]	VFG046094 (ECVR50_0250) uncharacterized protein ImpC [ACE T6SS (CVF736)] [Escherichia coli VR50]	VFG046096 (ECVR50_0257) hypothetical protein [ACE T6SS (CVF736)] [Escherichia coli VR50]	VFG035711_gi:15829483_ (ECs0229) hypothetical protein [ACE T6SS (CVF736)] [Escherichia coli O157:H7 str. Sakai]	VFG042095_gi:15832966_ (ECs3712) hypothetical protein [ETT2 (SS017)] [Escherichia coli O157:H7 str. Sakai]	VFG046001 (ETEC_0103) protein transport protein HofB [Hemorrhagic E.coli pilus (HCP) (CVF825)] [Escherichia coli O78:H11:K80 str. H10407]	VFG045896 (ETEC_1007) periplasmic pilin chaperone [E.coli laminin-binding fimbriae (ELF) (CVF824)] [Escherichia coli O78:H11:K80 str. H10407]	VFG045912 (ETEC_1008) fimbrial outer membrane usher protein [E.coli laminin-binding fimbriae (ELF) (CVF824)] [Escherichia coli O78:H11:K80 str. H10407]	VFG045932 (ETEC_1011) fimbrial precursor [E.coli laminin-binding fimbriae (ELF) (CVF824)] [Escherichia coli O78:H11:K80 str. H10407]	VFG035728_gi:157155723_ (EcE24377A_0237) hypothetical protein [ACE T6SS (CVF736)] [Escherichia coli E24377A]	VFG045931 (EcE24377A_1056) fimbrial protein [E.coli laminin-binding fimbriae (ELF) (CVF824)] [Escherichia coli E24377A]	VFG035715_gi:291281048_ (G2583_0236) hypothetical protein [ACE T6SS (CVF736)] [Escherichia coli O55:H7 str. CB9615]	VFG045926 (O3M_16610) fimbrial-like adhesin protein [E.coli laminin-binding fimbriae (ELF) (CVF824)] [Escherichia coli O104:H4 str. 2009EL-2050]	VFG045906 (O3M_16615) outer membrane usher protein [E.coli laminin-binding fimbriae (ELF) (CVF824)] [Escherichia coli O104:H4 str. 2009EL-2050]	VFG035722_gi:410484142_ (O3M_20335) type VI secretion system protein ImpG [ACE T6SS (CVF736)] [Escherichia coli O104:H4 str. 2009EL-2050]	VFG045950 (O3M_20925) major pilin subunit [Hemorrhagic E.coli pilus (HCP) (CVF825)] [Escherichia coli O104:H4 str. 2009EL-2050]	VFG045987 (O3M_20930) hypothetical protein [Hemorrhagic E.coli pilus (HCP) (CVF825)] [Escherichia coli O104:H4 str. 2009EL-2050]	VFG045875 (UMNK88_1093) major type 1 subunit fimbrin FimA [E.coli laminin-binding fimbriae (ELF) (CVF824)] [Escherichia coli UMNK88]	VFG045897 (UMNK88_1094) chaperone protein FocC [E.coli laminin-binding fimbriae (ELF) (CVF824)] [Escherichia coli UMNK88]	VFG045913 (UMNK88_1095) outer membrane usher protein FimD [E.coli laminin-binding fimbriae (ELF) (CVF824)] [Escherichia coli UMNK88]	VFG045933 (UMNK88_1096) hypothetical protein [E.coli laminin-binding fimbriae (ELF) (CVF824)] [Escherichia coli UMNK88]	VFG035729_gi:386612389_ (UMNK88_238) hypothetical protein [ACE T6SS (CVF736)] [Escherichia coli UMNK88]	VFG035710_gi:15799909_ (Z0260) hypothetical protein [EHS (SS185)] [Escherichia coli O157:H7 str. EDL933]
ECL20223	VFG046044 (APECO78_03970) type IV pilin biogenesis protein [Hemorrhagic E.coli pilus (HCP) (CVF825)] [Escherichia coli O78:H18 str. WS3294A]	VFG046007 (APECO78_03975) hypothetical protein [Hemorrhagic E.coli pilus (HCP) (CVF825)] [Escherichia coli O78:H18 str. WS3294A]	VFG045899 (APECO78_08685) periplasmic pilin chaperone [E.coli laminin-binding fimbriae (ELF) (CVF824)] [Escherichia coli O78:H18 str. WS3294A]	VFG045915 (APECO78_08690) outer membrane usher protein [E.coli laminin-binding fimbriae (ELF) (CVF824)] [Escherichia coli O78:H18 str. WS3294A]	VFG045935 (APECO78_08695) fimbrial-like adhesin protein [E.coli laminin-binding fimbriae (ELF) (CVF824)] [Escherichia coli O78:H18 str. WS3294A]	VFG045983 (CDCO157_0108) hypothetical protein [Hemorrhagic E.coli pilus (HCP) (CVF825)] [Escherichia coli O157:H7 str. Xuzhou21]	VFG045827 (EC958_1421) hemolysin E [Hemolysin/cytolysin A (CVF750)] [Escherichia coli O25b:H4-ST131]				VFG045884 (ECH74115_1101) periplasmic pilus chaperone family protein [E.coli laminin-binding fimbriae (ELF) (CVF824)] [Escherichia coli O157:H7 str. EC4115]				VFG045881 (ECO55CA74_05725) chaperone [E.coli laminin-binding fimbriae (ELF) (CVF824)] [Escherichia coli O55:H7 str. RM12579]	VFG046031 (ECP_0106) type IV pilin biogenesis protein [Hemorrhagic E.coli pilus (HCP) (CVF825)] [Escherichia coli 536]	VFG045993 (ECP_0107) hypothetical protein [Hemorrhagic E.coli pilus (HCP) (CVF825)] [Escherichia coli 536]	VFG045956 (ECP_0108) major pilin subunit [Hemorrhagic E.coli pilus (HCP) (CVF825)] [Escherichia coli 536]	VFG043545_gi:218560235_ (ECS88_3547) lipoprotein NlpI [NlpI (AI331)] [Escherichia coli O45:K1:H7 str. S88]												VFG042095_gi:15832966_ (ECs3712) hypothetical protein [ETT2 (SS017)] [Escherichia coli O157:H7 str. Sakai]	VFG046001 (ETEC_0103) protein transport protein HofB [Hemorrhagic E.coli pilus (HCP) (CVF825)] [Escherichia coli O78:H11:K80 str. H10407]	VFG045896 (ETEC_1007) periplasmic pilin chaperone [E.coli laminin-binding fimbriae (ELF) (CVF824)] [Escherichia coli O78:H11:K80 str. H10407]	VFG045912 (ETEC_1008) fimbrial outer membrane usher protein [E.coli laminin-binding fimbriae (ELF) (CVF824)] [Escherichia coli O78:H11:K80 str. H10407]	VFG045932 (ETEC_1011) fimbrial precursor [E.coli laminin-binding fimbriae (ELF) (CVF824)] [Escherichia coli O78:H11:K80 str. H10407]		VFG045931 (EcE24377A_1056) fimbrial protein [E.coli laminin-binding fimbriae (ELF) (CVF824)] [Escherichia coli E24377A]		VFG045926 (O3M_16610) fimbrial-like adhesin protein [E.coli laminin-binding fimbriae (ELF) (CVF824)] [Escherichia coli O104:H4 str. 2009EL-2050]	VFG045906 (O3M_16615) outer membrane usher protein [E.coli laminin-binding fimbriae (ELF) (CVF824)] [Escherichia coli O104:H4 str. 2009EL-2050]		VFG045950 (O3M_20925) major pilin subunit [Hemorrhagic E.coli pilus (HCP) (CVF825)] [Escherichia coli O104:H4 str. 2009EL-2050]	VFG045987 (O3M_20930) hypothetical protein [Hemorrhagic E.coli pilus (HCP) (CVF825)] [Escherichia coli O104:H4 str. 2009EL-2050]		VFG045897 (UMNK88_1094) chaperone protein FocC [E.coli laminin-binding fimbriae (ELF) (CVF824)] [Escherichia coli UMNK88]	VFG045913 (UMNK88_1095) outer membrane usher protein FimD [E.coli laminin-binding fimbriae (ELF) (CVF824)] [Escherichia coli UMNK88]	VFG045933 (UMNK88_1096) hypothetical protein [E.coli laminin-binding fimbriae (ELF) (CVF824)] [Escherichia coli UMNK88]
ECL20239	VFG046044 (APECO78_03970) type IV pilin biogenesis protein [Hemorrhagic E.coli pilus (HCP) (CVF825)] [Escherichia coli O78:H18 str. WS3294A]	VFG046007 (APECO78_03975) hypothetical protein [Hemorrhagic E.coli pilus (HCP) (CVF825)] [Escherichia coli O78:H18 str. WS3294A]	VFG045899 (APECO78_08685) periplasmic pilin chaperone [E.coli laminin-binding fimbriae (ELF) (CVF824)] [Escherichia coli O78:H18 str. WS3294A]	VFG045915 (APECO78_08690) outer membrane usher protein [E.coli laminin-binding fimbriae (ELF) (CVF824)] [Escherichia coli O78:H18 str. WS3294A]	VFG045935 (APECO78_08695) fimbrial-like adhesin protein [E.coli laminin-binding fimbriae (ELF) (CVF824)] [Escherichia coli O78:H18 str. WS3294A]	VFG045983 (CDCO157_0108) hypothetical protein [Hemorrhagic E.coli pilus (HCP) (CVF825)] [Escherichia coli O157:H7 str. Xuzhou21]	VFG045827 (EC958_1421) hemolysin E [Hemolysin/cytolysin A (CVF750)] [Escherichia coli O25b:H4-ST131]	VFG045820 (EC958_4121) putative autotransporter [AIDA-I (CVF450)] [Escherichia coli O25b:H4-ST131]	VFG045826 (EC958_5138) Fluffing protein [Cah, AIDA-I type (CVF745)] [Escherichia coli O25b:H4-ST131]	VFG045862 (ECH74115_1100) fimbrial protein [E.coli laminin-binding fimbriae (ELF) (CVF824)] [Escherichia coli O157:H7 str. EC4115]	VFG045884 (ECH74115_1101) periplasmic pilus chaperone family protein [E.coli laminin-binding fimbriae (ELF) (CVF824)] [Escherichia coli O157:H7 str. EC4115]	VFG035720_gi:260842456_ (ECO103_0224) hypothetical protein [ACE T6SS (CVF736)] [Escherichia coli O103:H2 str. 12009]	VFG035721_gi:260866370_ (ECO111_0230) hypothetical protein [ACE T6SS (CVF736)] [Escherichia coli O111:H- str. 11128]	VFG045859 (ECO55CA74_05720) putative fimbrial-like adhesin protein [E.coli laminin-binding fimbriae (ELF) (CVF824)] [Escherichia coli O55:H7 str. RM12579]	VFG045881 (ECO55CA74_05725) chaperone [E.coli laminin-binding fimbriae (ELF) (CVF824)] [Escherichia coli O55:H7 str. RM12579]	VFG046031 (ECP_0106) type IV pilin biogenesis protein [Hemorrhagic E.coli pilus (HCP) (CVF825)] [Escherichia coli 536]	VFG045993 (ECP_0107) hypothetical protein [Hemorrhagic E.coli pilus (HCP) (CVF825)] [Escherichia coli 536]	VFG045956 (ECP_0108) major pilin subunit [Hemorrhagic E.coli pilus (HCP) (CVF825)] [Escherichia coli 536]	VFG043545_gi:218560235_ (ECS88_3547) lipoprotein NlpI [NlpI (AI331)] [Escherichia coli O45:K1:H7 str. S88]	VFG046082 (ECVR50_0238) hypothetical protein [ACE T6SS (CVF736)] [Escherichia coli VR50]	VFG046083 (ECVR50_0239) IcmF-related protein [ACE T6SS (CVF736)] [Escherichia coli VR50]	VFG046084 (ECVR50_0240) uncharacterized protein ImpA [ACE T6SS (CVF736)] [Escherichia coli VR50]	VFG046086 (ECVR50_0242) putative protease [ACE T6SS (CVF736)] [Escherichia coli VR50]	VFG046090 (ECVR50_0246) hypothetical protein [ACE T6SS (CVF736)] [Escherichia coli VR50]	VFG046091 (ECVR50_0247) hypothetical protein [ACE T6SS (CVF736)] [Escherichia coli VR50]	VFG046092 (ECVR50_0248) hypothetical protein [ACE T6SS (CVF736)] [Escherichia coli VR50]	VFG046093 (ECVR50_0249) hypothetical protein [ACE T6SS (CVF736)] [Escherichia coli VR50]	VFG046094 (ECVR50_0250) uncharacterized protein ImpC [ACE T6SS (CVF736)] [Escherichia coli VR50]	VFG046096 (ECVR50_0257) hypothetical protein [ACE T6SS (CVF736)] [Escherichia coli VR50]	VFG035711_gi:15829483_ (ECs0229) hypothetical protein [ACE T6SS (CVF736)] [Escherichia coli O157:H7 str. Sakai]	VFG042095_gi:15832966_ (ECs3712) hypothetical protein [ETT2 (SS017)] [Escherichia coli O157:H7 str. Sakai]	VFG046001 (ETEC_0103) protein transport protein HofB [Hemorrhagic E.coli pilus (HCP) (CVF825)] [Escherichia coli O78:H11:K80 str. H10407]	VFG045896 (ETEC_1007) periplasmic pilin chaperone [E.coli laminin-binding fimbriae (ELF) (CVF824)] [Escherichia coli O78:H11:K80 str. H10407]	VFG045912 (ETEC_1008) fimbrial outer membrane usher protein [E.coli laminin-binding fimbriae (ELF) (CVF824)] [Escherichia coli O78:H11:K80 str. H10407]	VFG045932 (ETEC_1011) fimbrial precursor [E.coli laminin-binding fimbriae (ELF) (CVF824)] [Escherichia coli O78:H11:K80 str. H10407]	VFG035728_gi:157155723_ (EcE24377A_0237) hypothetical protein [ACE T6SS (CVF736)] [Escherichia coli E24377A]	VFG045931 (EcE24377A_1056) fimbrial protein [E.coli laminin-binding fimbriae (ELF) (CVF824)] [Escherichia coli E24377A]	VFG035715_gi:291281048_ (G2583_0236) hypothetical protein [ACE T6SS (CVF736)] [Escherichia coli O55:H7 str. CB9615]	VFG045926 (O3M_16610) fimbrial-like adhesin protein [E.coli laminin-binding fimbriae (ELF) (CVF824)] [Escherichia coli O104:H4 str. 2009EL-2050]	VFG045906 (O3M_16615) outer membrane usher protein [E.coli laminin-binding fimbriae (ELF) (CVF824)] [Escherichia coli O104:H4 str. 2009EL-2050]	VFG035722_gi:410484142_ (O3M_20335) type VI secretion system protein ImpG [ACE T6SS (CVF736)] [Escherichia coli O104:H4 str. 2009EL-2050]	VFG045950 (O3M_20925) major pilin subunit [Hemorrhagic E.coli pilus (HCP) (CVF825)] [Escherichia coli O104:H4 str. 2009EL-2050]	VFG045987 (O3M_20930) hypothetical protein [Hemorrhagic E.coli pilus (HCP) (CVF825)] [Escherichia coli O104:H4 str. 2009EL-2050]	VFG045875 (UMNK88_1093) major type 1 subunit fimbrin FimA [E.coli laminin-binding fimbriae (ELF) (CVF824)] [Escherichia coli UMNK88]	VFG045897 (UMNK88_1094) chaperone protein FocC [E.coli laminin-binding fimbriae (ELF) (CVF824)] [Escherichia coli UMNK88]	VFG045913 (UMNK88_1095) outer membrane usher protein FimD [E.coli laminin-binding fimbriae (ELF) (CVF824)] [Escherichia coli UMNK88]	VFG045933 (UMNK88_1096) hypothetical protein [E.coli laminin-binding fimbriae (ELF) (CVF824)] [Escherichia coli UMNK88]	VFG035729_gi:386612389_ (UMNK88_238) hypothetical protein [ACE T6SS (CVF736)] [Escherichia coli UMNK88]	VFG035710_gi:15799909_ (Z0260) hypothetical protein [EHS (SS185)] [Escherichia coli O157:H7 str. EDL933]
ECL20256	VFG046044 (APECO78_03970) type IV pilin biogenesis protein [Hemorrhagic E.coli pilus (HCP) (CVF825)] [Escherichia coli O78:H18 str. WS3294A]	VFG046007 (APECO78_03975) hypothetical protein [Hemorrhagic E.coli pilus (HCP) (CVF825)] [Escherichia coli O78:H18 str. WS3294A]	VFG045899 (APECO78_08685) periplasmic pilin chaperone [E.coli laminin-binding fimbriae (ELF) (CVF824)] [Escherichia coli O78:H18 str. WS3294A]	VFG045915 (APECO78_08690) outer membrane usher protein [E.coli laminin-binding fimbriae (ELF) (CVF824)] [Escherichia coli O78:H18 str. WS3294A]	VFG045935 (APECO78_08695) fimbrial-like adhesin protein [E.coli laminin-binding fimbriae (ELF) (CVF824)] [Escherichia coli O78:H18 str. WS3294A]	VFG045983 (CDCO157_0108) hypothetical protein [Hemorrhagic E.coli pilus (HCP) (CVF825)] [Escherichia coli O157:H7 str. Xuzhou21]	VFG045827 (EC958_1421) hemolysin E [Hemolysin/cytolysin A (CVF750)] [Escherichia coli O25b:H4-ST131]	VFG045820 (EC958_4121) putative autotransporter [AIDA-I (CVF450)] [Escherichia coli O25b:H4-ST131]	VFG045826 (EC958_5138) Fluffing protein [Cah, AIDA-I type (CVF745)] [Escherichia coli O25b:H4-ST131]	VFG045862 (ECH74115_1100) fimbrial protein [E.coli laminin-binding fimbriae (ELF) (CVF824)] [Escherichia coli O157:H7 str. EC4115]	VFG045884 (ECH74115_1101) periplasmic pilus chaperone family protein [E.coli laminin-binding fimbriae (ELF) (CVF824)] [Escherichia coli O157:H7 str. EC4115]	VFG035720_gi:260842456_ (ECO103_0224) hypothetical protein [ACE T6SS (CVF736)] [Escherichia coli O103:H2 str. 12009]	VFG035721_gi:260866370_ (ECO111_0230) hypothetical protein [ACE T6SS (CVF736)] [Escherichia coli O111:H- str. 11128]	VFG045859 (ECO55CA74_05720) putative fimbrial-like adhesin protein [E.coli laminin-binding fimbriae (ELF) (CVF824)] [Escherichia coli O55:H7 str. RM12579]	VFG045881 (ECO55CA74_05725) chaperone [E.coli laminin-binding fimbriae (ELF) (CVF824)] [Escherichia coli O55:H7 str. RM12579]	VFG046031 (ECP_0106) type IV pilin biogenesis protein [Hemorrhagic E.coli pilus (HCP) (CVF825)] [Escherichia coli 536]	VFG045993 (ECP_0107) hypothetical protein [Hemorrhagic E.coli pilus (HCP) (CVF825)] [Escherichia coli 536]	VFG045956 (ECP_0108) major pilin subunit [Hemorrhagic E.coli pilus (HCP) (CVF825)] [Escherichia coli 536]	VFG043545_gi:218560235_ (ECS88_3547) lipoprotein NlpI [NlpI (AI331)] [Escherichia coli O45:K1:H7 str. S88]	VFG046082 (ECVR50_0238) hypothetical protein [ACE T6SS (CVF736)] [Escherichia coli VR50]	VFG046083 (ECVR50_0239) IcmF-related protein [ACE T6SS (CVF736)] [Escherichia coli VR50]	VFG046084 (ECVR50_0240) uncharacterized protein ImpA [ACE T6SS (CVF736)] [Escherichia coli VR50]	VFG046086 (ECVR50_0242) putative protease [ACE T6SS (CVF736)] [Escherichia coli VR50]	VFG046090 (ECVR50_0246) hypothetical protein [ACE T6SS (CVF736)] [Escherichia coli VR50]	VFG046091 (ECVR50_0247) hypothetical protein [ACE T6SS (CVF736)] [Escherichia coli VR50]	VFG046092 (ECVR50_0248) hypothetical protein [ACE T6SS (CVF736)] [Escherichia coli VR50]	VFG046093 (ECVR50_0249) hypothetical protein [ACE T6SS (CVF736)] [Escherichia coli VR50]	VFG046094 (ECVR50_0250) uncharacterized protein ImpC [ACE T6SS (CVF736)] [Escherichia coli VR50]	VFG046096 (ECVR50_0257) hypothetical protein [ACE T6SS (CVF736)] [Escherichia coli VR50]	VFG035711_gi:15829483_ (ECs0229) hypothetical protein [ACE T6SS (CVF736)] [Escherichia coli O157:H7 str. Sakai]	VFG042095_gi:15832966_ (ECs3712) hypothetical protein [ETT2 (SS017)] [Escherichia coli O157:H7 str. Sakai]	VFG046001 (ETEC_0103) protein transport protein HofB [Hemorrhagic E.coli pilus (HCP) (CVF825)] [Escherichia coli O78:H11:K80 str. H10407]	VFG045896 (ETEC_1007) periplasmic pilin chaperone [E.coli laminin-binding fimbriae (ELF) (CVF824)] [Escherichia coli O78:H11:K80 str. H10407]	VFG045912 (ETEC_1008) fimbrial outer membrane usher protein [E.coli laminin-binding fimbriae (ELF) (CVF824)] [Escherichia coli O78:H11:K80 str. H10407]	VFG045932 (ETEC_1011) fimbrial precursor [E.coli laminin-binding fimbriae (ELF) (CVF824)] [Escherichia coli O78:H11:K80 str. H10407]	VFG035728_gi:157155723_ (EcE24377A_0237) hypothetical protein [ACE T6SS (CVF736)] [Escherichia coli E24377A]	VFG045931 (EcE24377A_1056) fimbrial protein [E.coli laminin-binding fimbriae (ELF) (CVF824)] [Escherichia coli E24377A]	VFG035715_gi:291281048_ (G2583_0236) hypothetical protein [ACE T6SS (CVF736)] [Escherichia coli O55:H7 str. CB9615]	VFG045926 (O3M_16610) fimbrial-like adhesin protein [E.coli laminin-binding fimbriae (ELF) (CVF824)] [Escherichia coli O104:H4 str. 2009EL-2050]	VFG045906 (O3M_16615) outer membrane usher protein [E.coli laminin-binding fimbriae (ELF) (CVF824)] [Escherichia coli O104:H4 str. 2009EL-2050]	VFG035722_gi:410484142_ (O3M_20335) type VI secretion system protein ImpG [ACE T6SS (CVF736)] [Escherichia coli O104:H4 str. 2009EL-2050]	VFG045950 (O3M_20925) major pilin subunit [Hemorrhagic E.coli pilus (HCP) (CVF825)] [Escherichia coli O104:H4 str. 2009EL-2050]	VFG045987 (O3M_20930) hypothetical protein [Hemorrhagic E.coli pilus (HCP) (CVF825)] [Escherichia coli O104:H4 str. 2009EL-2050]	VFG045875 (UMNK88_1093) major type 1 subunit fimbrin FimA [E.coli laminin-binding fimbriae (ELF) (CVF824)] [Escherichia coli UMNK88]	VFG045897 (UMNK88_1094) chaperone protein FocC [E.coli laminin-binding fimbriae (ELF) (CVF824)] [Escherichia coli UMNK88]	VFG045913 (UMNK88_1095) outer membrane usher protein FimD [E.coli laminin-binding fimbriae (ELF) (CVF824)] [Escherichia coli UMNK88]	VFG045933 (UMNK88_1096) hypothetical protein [E.coli laminin-binding fimbriae (ELF) (CVF824)] [Escherichia coli UMNK88]	VFG035729_gi:386612389_ (UMNK88_238) hypothetical protein [ACE T6SS (CVF736)] [Escherichia coli UMNK88]	VFG035710_gi:15799909_ (Z0260) hypothetical protein [EHS (SS185)] [Escherichia coli O157:H7 str. EDL933]
ECL20278	VFG046044 (APECO78_03970) type IV pilin biogenesis protein [Hemorrhagic E.coli pilus (HCP) (CVF825)] [Escherichia coli O78:H18 str. WS3294A]	VFG046007 (APECO78_03975) hypothetical protein [Hemorrhagic E.coli pilus (HCP) (CVF825)] [Escherichia coli O78:H18 str. WS3294A]	VFG045899 (APECO78_08685) periplasmic pilin chaperone [E.coli laminin-binding fimbriae (ELF) (CVF824)] [Escherichia coli O78:H18 str. WS3294A]	VFG045915 (APECO78_08690) outer membrane usher protein [E.coli laminin-binding fimbriae (ELF) (CVF824)] [Escherichia coli O78:H18 str. WS3294A]	VFG045935 (APECO78_08695) fimbrial-like adhesin protein [E.coli laminin-binding fimbriae (ELF) (CVF824)] [Escherichia coli O78:H18 str. WS3294A]	VFG045983 (CDCO157_0108) hypothetical protein [Hemorrhagic E.coli pilus (HCP) (CVF825)] [Escherichia coli O157:H7 str. Xuzhou21]	VFG045827 (EC958_1421) hemolysin E [Hemolysin/cytolysin A (CVF750)] [Escherichia coli O25b:H4-ST131]			VFG045862 (ECH74115_1100) fimbrial protein [E.coli laminin-binding fimbriae (ELF) (CVF824)] [Escherichia coli O157:H7 str. EC4115]	VFG045884 (ECH74115_1101) periplasmic pilus chaperone family protein [E.coli laminin-binding fimbriae (ELF) (CVF824)] [Escherichia coli O157:H7 str. EC4115]	VFG035720_gi:260842456_ (ECO103_0224) hypothetical protein [ACE T6SS (CVF736)] [Escherichia coli O103:H2 str. 12009]	VFG035721_gi:260866370_ (ECO111_0230) hypothetical protein [ACE T6SS (CVF736)] [Escherichia coli O111:H- str. 11128]	VFG045859 (ECO55CA74_05720) putative fimbrial-like adhesin protein [E.coli laminin-binding fimbriae (ELF) (CVF824)] [Escherichia coli O55:H7 str. RM12579]	VFG045881 (ECO55CA74_05725) chaperone [E.coli laminin-binding fimbriae (ELF) (CVF824)] [Escherichia coli O55:H7 str. RM12579]	VFG046031 (ECP_0106) type IV pilin biogenesis protein [Hemorrhagic E.coli pilus (HCP) (CVF825)] [Escherichia coli 536]	VFG045993 (ECP_0107) hypothetical protein [Hemorrhagic E.coli pilus (HCP) (CVF825)] [Escherichia coli 536]	VFG045956 (ECP_0108) major pilin subunit [Hemorrhagic E.coli pilus (HCP) (CVF825)] [Escherichia coli 536]	VFG043545_gi:218560235_ (ECS88_3547) lipoprotein NlpI [NlpI (AI331)] [Escherichia coli O45:K1:H7 str. S88]	VFG046082 (ECVR50_0238) hypothetical protein [ACE T6SS (CVF736)] [Escherichia coli VR50]	VFG046083 (ECVR50_0239) IcmF-related protein [ACE T6SS (CVF736)] [Escherichia coli VR50]	VFG046084 (ECVR50_0240) uncharacterized protein ImpA [ACE T6SS (CVF736)] [Escherichia coli VR50]	VFG046086 (ECVR50_0242) putative protease [ACE T6SS (CVF736)] [Escherichia coli VR50]	VFG046090 (ECVR50_0246) hypothetical protein [ACE T6SS (CVF736)] [Escherichia coli VR50]	VFG046091 (ECVR50_0247) hypothetical protein [ACE T6SS (CVF736)] [Escherichia coli VR50]	VFG046092 (ECVR50_0248) hypothetical protein [ACE T6SS (CVF736)] [Escherichia coli VR50]	VFG046093 (ECVR50_0249) hypothetical protein [ACE T6SS (CVF736)] [Escherichia coli VR50]	VFG046094 (ECVR50_0250) uncharacterized protein ImpC [ACE T6SS (CVF736)] [Escherichia coli VR50]	VFG046096 (ECVR50_0257) hypothetical protein [ACE T6SS (CVF736)] [Escherichia coli VR50]	VFG035711_gi:15829483_ (ECs0229) hypothetical protein [ACE T6SS (CVF736)] [Escherichia coli O157:H7 str. Sakai]	VFG042095_gi:15832966_ (ECs3712) hypothetical protein [ETT2 (SS017)] [Escherichia coli O157:H7 str. Sakai]	VFG046001 (ETEC_0103) protein transport protein HofB [Hemorrhagic E.coli pilus (HCP) (CVF825)] [Escherichia coli O78:H11:K80 str. H10407]	VFG045896 (ETEC_1007) periplasmic pilin chaperone [E.coli laminin-binding fimbriae (ELF) (CVF824)] [Escherichia coli O78:H11:K80 str. H10407]	VFG045912 (ETEC_1008) fimbrial outer membrane usher protein [E.coli laminin-binding fimbriae (ELF) (CVF824)] [Escherichia coli O78:H11:K80 str. H10407]	VFG045932 (ETEC_1011) fimbrial precursor [E.coli laminin-binding fimbriae (ELF) (CVF824)] [Escherichia coli O78:H11:K80 str. H10407]	VFG035728_gi:157155723_ (EcE24377A_0237) hypothetical protein [ACE T6SS (CVF736)] [Escherichia coli E24377A]	VFG045931 (EcE24377A_1056) fimbrial protein [E.coli laminin-binding fimbriae (ELF) (CVF824)] [Escherichia coli E24377A]	VFG035715_gi:291281048_ (G2583_0236) hypothetical protein [ACE T6SS (CVF736)] [Escherichia coli O55:H7 str. CB9615]	VFG045926 (O3M_16610) fimbrial-like adhesin protein [E.coli laminin-binding fimbriae (ELF) (CVF824)] [Escherichia coli O104:H4 str. 2009EL-2050]	VFG045906 (O3M_16615) outer membrane usher protein [E.coli laminin-binding fimbriae (ELF) (CVF824)] [Escherichia coli O104:H4 str. 2009EL-2050]	VFG035722_gi:410484142_ (O3M_20335) type VI secretion system protein ImpG [ACE T6SS (CVF736)] [Escherichia coli O104:H4 str. 2009EL-2050]	VFG045950 (O3M_20925) major pilin subunit [Hemorrhagic E.coli pilus (HCP) (CVF825)] [Escherichia coli O104:H4 str. 2009EL-2050]	VFG045987 (O3M_20930) hypothetical protein [Hemorrhagic E.coli pilus (HCP) (CVF825)] [Escherichia coli O104:H4 str. 2009EL-2050]	VFG045875 (UMNK88_1093) major type 1 subunit fimbrin FimA [E.coli laminin-binding fimbriae (ELF) (CVF824)] [Escherichia coli UMNK88]	VFG045897 (UMNK88_1094) chaperone protein FocC [E.coli laminin-binding fimbriae (ELF) (CVF824)] [Escherichia coli UMNK88]	VFG045913 (UMNK88_1095) outer membrane usher protein FimD [E.coli laminin-binding fimbriae (ELF) (CVF824)] [Escherichia coli UMNK88]	VFG045933 (UMNK88_1096) hypothetical protein [E.coli laminin-binding fimbriae (ELF) (CVF824)] [Escherichia coli UMNK88]	VFG035729_gi:386612389_ (UMNK88_238) hypothetical protein [ACE T6SS (CVF736)] [Escherichia coli UMNK88]	VFG035710_gi:15799909_ (Z0260) hypothetical protein [EHS (SS185)] [Escherichia coli O157:H7 str. EDL933]
ECL20290	VFG046044 (APECO78_03970) type IV pilin biogenesis protein [Hemorrhagic E.coli pilus (HCP) (CVF825)] [Escherichia coli O78:H18 str. WS3294A]	VFG046007 (APECO78_03975) hypothetical protein [Hemorrhagic E.coli pilus (HCP) (CVF825)] [Escherichia coli O78:H18 str. WS3294A]	VFG045899 (APECO78_08685) periplasmic pilin chaperone [E.coli laminin-binding fimbriae (ELF) (CVF824)] [Escherichia coli O78:H18 str. WS3294A]	VFG045915 (APECO78_08690) outer membrane usher protein [E.coli laminin-binding fimbriae (ELF) (CVF824)] [Escherichia coli O78:H18 str. WS3294A]	VFG045935 (APECO78_08695) fimbrial-like adhesin protein [E.coli laminin-binding fimbriae (ELF) (CVF824)] [Escherichia coli O78:H18 str. WS3294A]	VFG045983 (CDCO157_0108) hypothetical protein [Hemorrhagic E.coli pilus (HCP) (CVF825)] [Escherichia coli O157:H7 str. Xuzhou21]	VFG045827 (EC958_1421) hemolysin E [Hemolysin/cytolysin A (CVF750)] [Escherichia coli O25b:H4-ST131]			VFG045862 (ECH74115_1100) fimbrial protein [E.coli laminin-binding fimbriae (ELF) (CVF824)] [Escherichia coli O157:H7 str. EC4115]	VFG045884 (ECH74115_1101) periplasmic pilus chaperone family protein [E.coli laminin-binding fimbriae (ELF) (CVF824)] [Escherichia coli O157:H7 str. EC4115]	VFG035720_gi:260842456_ (ECO103_0224) hypothetical protein [ACE T6SS (CVF736)] [Escherichia coli O103:H2 str. 12009]	VFG035721_gi:260866370_ (ECO111_0230) hypothetical protein [ACE T6SS (CVF736)] [Escherichia coli O111:H- str. 11128]	VFG045859 (ECO55CA74_05720) putative fimbrial-like adhesin protein [E.coli laminin-binding fimbriae (ELF) (CVF824)] [Escherichia coli O55:H7 str. RM12579]	VFG045881 (ECO55CA74_05725) chaperone [E.coli laminin-binding fimbriae (ELF) (CVF824)] [Escherichia coli O55:H7 str. RM12579]	VFG046031 (ECP_0106) type IV pilin biogenesis protein [Hemorrhagic E.coli pilus (HCP) (CVF825)] [Escherichia coli 536]	VFG045993 (ECP_0107) hypothetical protein [Hemorrhagic E.coli pilus (HCP) (CVF825)] [Escherichia coli 536]	VFG045956 (ECP_0108) major pilin subunit [Hemorrhagic E.coli pilus (HCP) (CVF825)] [Escherichia coli 536]	VFG043545_gi:218560235_ (ECS88_3547) lipoprotein NlpI [NlpI (AI331)] [Escherichia coli O45:K1:H7 str. S88]	VFG046082 (ECVR50_0238) hypothetical protein [ACE T6SS (CVF736)] [Escherichia coli VR50]	VFG046083 (ECVR50_0239) IcmF-related protein [ACE T6SS (CVF736)] [Escherichia coli VR50]	VFG046084 (ECVR50_0240) uncharacterized protein ImpA [ACE T6SS (CVF736)] [Escherichia coli VR50]	VFG046086 (ECVR50_0242) putative protease [ACE T6SS (CVF736)] [Escherichia coli VR50]	VFG046090 (ECVR50_0246) hypothetical protein [ACE T6SS (CVF736)] [Escherichia coli VR50]	VFG046091 (ECVR50_0247) hypothetical protein [ACE T6SS (CVF736)] [Escherichia coli VR50]	VFG046092 (ECVR50_0248) hypothetical protein [ACE T6SS (CVF736)] [Escherichia coli VR50]	VFG046093 (ECVR50_0249) hypothetical protein [ACE T6SS (CVF736)] [Escherichia coli VR50]	VFG046094 (ECVR50_0250) uncharacterized protein ImpC [ACE T6SS (CVF736)] [Escherichia coli VR50]	VFG046096 (ECVR50_0257) hypothetical protein [ACE T6SS (CVF736)] [Escherichia coli VR50]	VFG035711_gi:15829483_ (ECs0229) hypothetical protein [ACE T6SS (CVF736)] [Escherichia coli O157:H7 str. Sakai]	VFG042095_gi:15832966_ (ECs3712) hypothetical protein [ETT2 (SS017)] [Escherichia coli O157:H7 str. Sakai]	VFG046001 (ETEC_0103) protein transport protein HofB [Hemorrhagic E.coli pilus (HCP) (CVF825)] [Escherichia coli O78:H11:K80 str. H10407]	VFG045896 (ETEC_1007) periplasmic pilin chaperone [E.coli laminin-binding fimbriae (ELF) (CVF824)] [Escherichia coli O78:H11:K80 str. H10407]	VFG045912 (ETEC_1008) fimbrial outer membrane usher protein [E.coli laminin-binding fimbriae (ELF) (CVF824)] [Escherichia coli O78:H11:K80 str. H10407]	VFG045932 (ETEC_1011) fimbrial precursor [E.coli laminin-binding fimbriae (ELF) (CVF824)] [Escherichia coli O78:H11:K80 str. H10407]	VFG035728_gi:157155723_ (EcE24377A_0237) hypothetical protein [ACE T6SS (CVF736)] [Escherichia coli E24377A]	VFG045931 (EcE24377A_1056) fimbrial protein [E.coli laminin-binding fimbriae (ELF) (CVF824)] [Escherichia coli E24377A]	VFG035715_gi:291281048_ (G2583_0236) hypothetical protein [ACE T6SS (CVF736)] [Escherichia coli O55:H7 str. CB9615]	VFG045926 (O3M_16610) fimbrial-like adhesin protein [E.coli laminin-binding fimbriae (ELF) (CVF824)] [Escherichia coli O104:H4 str. 2009EL-2050]	VFG045906 (O3M_16615) outer membrane usher protein [E.coli laminin-binding fimbriae (ELF) (CVF824)] [Escherichia coli O104:H4 str. 2009EL-2050]	VFG035722_gi:410484142_ (O3M_20335) type VI secretion system protein ImpG [ACE T6SS (CVF736)] [Escherichia coli O104:H4 str. 2009EL-2050]	VFG045950 (O3M_20925) major pilin subunit [Hemorrhagic E.coli pilus (HCP) (CVF825)] [Escherichia coli O104:H4 str. 2009EL-2050]	VFG045987 (O3M_20930) hypothetical protein [Hemorrhagic E.coli pilus (HCP) (CVF825)] [Escherichia coli O104:H4 str. 2009EL-2050]	VFG045875 (UMNK88_1093) major type 1 subunit fimbrin FimA [E.coli laminin-binding fimbriae (ELF) (CVF824)] [Escherichia coli UMNK88]	VFG045897 (UMNK88_1094) chaperone protein FocC [E.coli laminin-binding fimbriae (ELF) (CVF824)] [Escherichia coli UMNK88]	VFG045913 (UMNK88_1095) outer membrane usher protein FimD [E.coli laminin-binding fimbriae (ELF) (CVF824)] [Escherichia coli UMNK88]	VFG045933 (UMNK88_1096) hypothetical protein [E.coli laminin-binding fimbriae (ELF) (CVF824)] [Escherichia coli UMNK88]	VFG035729_gi:386612389_ (UMNK88_238) hypothetical protein [ACE T6SS (CVF736)] [Escherichia coli UMNK88]	VFG035710_gi:15799909_ (Z0260) hypothetical protein [EHS (SS185)] [Escherichia coli O157:H7 str. EDL933]
ECL20308	VFG046044 (APECO78_03970) type IV pilin biogenesis protein [Hemorrhagic E.coli pilus (HCP) (CVF825)] [Escherichia coli O78:H18 str. WS3294A]	VFG046007 (APECO78_03975) hypothetical protein [Hemorrhagic E.coli pilus (HCP) (CVF825)] [Escherichia coli O78:H18 str. WS3294A]	VFG045899 (APECO78_08685) periplasmic pilin chaperone [E.coli laminin-binding fimbriae (ELF) (CVF824)] [Escherichia coli O78:H18 str. WS3294A]	VFG045915 (APECO78_08690) outer membrane usher protein [E.coli laminin-binding fimbriae (ELF) (CVF824)] [Escherichia coli O78:H18 str. WS3294A]	VFG045935 (APECO78_08695) fimbrial-like adhesin protein [E.coli laminin-binding fimbriae (ELF) (CVF824)] [Escherichia coli O78:H18 str. WS3294A]	VFG045983 (CDCO157_0108) hypothetical protein [Hemorrhagic E.coli pilus (HCP) (CVF825)] [Escherichia coli O157:H7 str. Xuzhou21]	VFG045827 (EC958_1421) hemolysin E [Hemolysin/cytolysin A (CVF750)] [Escherichia coli O25b:H4-ST131]		VFG045826 (EC958_5138) Fluffing protein [Cah, AIDA-I type (CVF745)] [Escherichia coli O25b:H4-ST131]	VFG045862 (ECH74115_1100) fimbrial protein [E.coli laminin-binding fimbriae (ELF) (CVF824)] [Escherichia coli O157:H7 str. EC4115]	VFG045884 (ECH74115_1101) periplasmic pilus chaperone family protein [E.coli laminin-binding fimbriae (ELF) (CVF824)] [Escherichia coli O157:H7 str. EC4115]	VFG035720_gi:260842456_ (ECO103_0224) hypothetical protein [ACE T6SS (CVF736)] [Escherichia coli O103:H2 str. 12009]	VFG035721_gi:260866370_ (ECO111_0230) hypothetical protein [ACE T6SS (CVF736)] [Escherichia coli O111:H- str. 11128]	VFG045859 (ECO55CA74_05720) putative fimbrial-like adhesin protein [E.coli laminin-binding fimbriae (ELF) (CVF824)] [Escherichia coli O55:H7 str. RM12579]	VFG045881 (ECO55CA74_05725) chaperone [E.coli laminin-binding fimbriae (ELF) (CVF824)] [Escherichia coli O55:H7 str. RM12579]	VFG046031 (ECP_0106) type IV pilin biogenesis protein [Hemorrhagic E.coli pilus (HCP) (CVF825)] [Escherichia coli 536]	VFG045993 (ECP_0107) hypothetical protein [Hemorrhagic E.coli pilus (HCP) (CVF825)] [Escherichia coli 536]	VFG045956 (ECP_0108) major pilin subunit [Hemorrhagic E.coli pilus (HCP) (CVF825)] [Escherichia coli 536]	VFG043545_gi:218560235_ (ECS88_3547) lipoprotein NlpI [NlpI (AI331)] [Escherichia coli O45:K1:H7 str. S88]	VFG046082 (ECVR50_0238) hypothetical protein [ACE T6SS (CVF736)] [Escherichia coli VR50]	VFG046083 (ECVR50_0239) IcmF-related protein [ACE T6SS (CVF736)] [Escherichia coli VR50]	VFG046084 (ECVR50_0240) uncharacterized protein ImpA [ACE T6SS (CVF736)] [Escherichia coli VR50]	VFG046086 (ECVR50_0242) putative protease [ACE T6SS (CVF736)] [Escherichia coli VR50]	VFG046090 (ECVR50_0246) hypothetical protein [ACE T6SS (CVF736)] [Escherichia coli VR50]	VFG046091 (ECVR50_0247) hypothetical protein [ACE T6SS (CVF736)] [Escherichia coli VR50]	VFG046092 (ECVR50_0248) hypothetical protein [ACE T6SS (CVF736)] [Escherichia coli VR50]	VFG046093 (ECVR50_0249) hypothetical protein [ACE T6SS (CVF736)] [Escherichia coli VR50]	VFG046094 (ECVR50_0250) uncharacterized protein ImpC [ACE T6SS (CVF736)] [Escherichia coli VR50]	VFG046096 (ECVR50_0257) hypothetical protein [ACE T6SS (CVF736)] [Escherichia coli VR50]	VFG035711_gi:15829483_ (ECs0229) hypothetical protein [ACE T6SS (CVF736)] [Escherichia coli O157:H7 str. Sakai]	VFG042095_gi:15832966_ (ECs3712) hypothetical protein [ETT2 (SS017)] [Escherichia coli O157:H7 str. Sakai]	VFG046001 (ETEC_0103) protein transport protein HofB [Hemorrhagic E.coli pilus (HCP) (CVF825)] [Escherichia coli O78:H11:K80 str. H10407]	VFG045896 (ETEC_1007) periplasmic pilin chaperone [E.coli laminin-binding fimbriae (ELF) (CVF824)] [Escherichia coli O78:H11:K80 str. H10407]	VFG045912 (ETEC_1008) fimbrial outer membrane usher protein [E.coli laminin-binding fimbriae (ELF) (CVF824)] [Escherichia coli O78:H11:K80 str. H10407]	VFG045932 (ETEC_1011) fimbrial precursor [E.coli laminin-binding fimbriae (ELF) (CVF824)] [Escherichia coli O78:H11:K80 str. H10407]	VFG035728_gi:157155723_ (EcE24377A_0237) hypothetical protein [ACE T6SS (CVF736)] [Escherichia coli E24377A]	VFG045931 (EcE24377A_1056) fimbrial protein [E.coli laminin-binding fimbriae (ELF) (CVF824)] [Escherichia coli E24377A]	VFG035715_gi:291281048_ (G2583_0236) hypothetical protein [ACE T6SS (CVF736)] [Escherichia coli O55:H7 str. CB9615]	VFG045926 (O3M_16610) fimbrial-like adhesin protein [E.coli laminin-binding fimbriae (ELF) (CVF824)] [Escherichia coli O104:H4 str. 2009EL-2050]	VFG045906 (O3M_16615) outer membrane usher protein [E.coli laminin-binding fimbriae (ELF) (CVF824)] [Escherichia coli O104:H4 str. 2009EL-2050]	VFG035722_gi:410484142_ (O3M_20335) type VI secretion system protein ImpG [ACE T6SS (CVF736)] [Escherichia coli O104:H4 str. 2009EL-2050]	VFG045950 (O3M_20925) major pilin subunit [Hemorrhagic E.coli pilus (HCP) (CVF825)] [Escherichia coli O104:H4 str. 2009EL-2050]	VFG045987 (O3M_20930) hypothetical protein [Hemorrhagic E.coli pilus (HCP) (CVF825)] [Escherichia coli O104:H4 str. 2009EL-2050]	VFG045875 (UMNK88_1093) major type 1 subunit fimbrin FimA [E.coli laminin-binding fimbriae (ELF) (CVF824)] [Escherichia coli UMNK88]	VFG045897 (UMNK88_1094) chaperone protein FocC [E.coli laminin-binding fimbriae (ELF) (CVF824)] [Escherichia coli UMNK88]	VFG045913 (UMNK88_1095) outer membrane usher protein FimD [E.coli laminin-binding fimbriae (ELF) (CVF824)] [Escherichia coli UMNK88]	VFG045933 (UMNK88_1096) hypothetical protein [E.coli laminin-binding fimbriae (ELF) (CVF824)] [Escherichia coli UMNK88]	VFG035729_gi:386612389_ (UMNK88_238) hypothetical protein [ACE T6SS (CVF736)] [Escherichia coli UMNK88]	VFG035710_gi:15799909_ (Z0260) hypothetical protein [EHS (SS185)] [Escherichia coli O157:H7 str. EDL933]
[truncated: 173 more rows]
[truncated: 289 more columns]
