# Supplementary material for: High Risk Clone: A Proposal of Criteria Adapted to the One Health Context with Application to Enterotoxigenic Escherichia coli in the Pig Population
Source: Antibiotics (Basel). 2021 Feb 28;10(3):244. doi: 10.3390/antibiotics10030244 (PMC8000703; doi:10.3390/antibiotics10030244)
Supplement: Supplementary file 1 [file antibiotics-10-00244-s001.zip › TableS5_Resistancefinderresults.xlsx]

## Sheet: rf_total_2
ID_isolate	aac_3__IV	aph_3____Ib	aph_3___Ia	aph_6__Id	mdf_A_	sul2	tet_B_	tet_A_	dfrA12	floR	mph_A_	sul1	aac_3__VIa	aadA1	aadA24	aadA8b	ant_3____Ia	dfrA15	aadA2	aadA2b	aac_3__IIa	mph_E_	papA	tet_M_	tet_S_M_	cml	dfrA1	ant_2____Ia	cmlA1	dfrA34	aadA10	aadA11	dfrA14	tet_D_	tet_C_	erm_B_	qnrB1	qnrB10	qnrB13	qnrB14	qnrB15	qnrB16	qnrB17	qnrB18	qnrB20	qnrB23	qnrB24	qnrB26	qnrB29
ECL19159		aph(3'')-Ib_5_AF321551	aph(3')-Ia_1_V00359	aph(6)-Id_2_AF024602	mdf(A)_1_Y08743	sul2_3_HQ840942		tet(A)_6_AF534183	dfrA12_10_FM877486	floR_2_AF118107		sul1_11_DQ914960		aadA1_2_FJ591054	aadA24_1_DQ677333	aadA8b_1_AY139603			aadA2_2_JQ364967	aadA2b_1_D43625
ECL19373					mdf(A)_1_Y08743			tet(A)_6_AF534183			mph(A)_1_D16251			aadA1_3_JQ414041	aadA24_1_DQ677333	aadA8b_1_AY139603	ant(3'')-Ia_1_X02340		aadA2_1_NC_010870	aadA2b_1_D43625				tet(M)_8_X04388	tet(S/M)_1_HM367711	cml_1_M22614			cmlA1_2_AB212941							erm(B)_1_JN899585
ECL19390					mdf(A)_1_Y08743			tet(A)_6_AF534183
ECL19414					mdf(A)_1_Y08743	sul2_9_FJ197818		tet(A)_6_AF534183						aadA1_3_JQ414041	aadA24_1_DQ677333	aadA8b_1_AY139603	ant(3'')-Ia_1_X02340		aadA2_1_NC_010870	aadA2b_1_D43625						cml_1_M22614			cmlA1_2_AB212941
ECL19427					mdf(A)_1_Y08743	sul2_9_FJ197818		tet(A)_6_AF534183						aadA1_3_JQ414041	aadA24_1_DQ677333	aadA8b_1_AY139603	ant(3'')-Ia_1_X02340		aadA2_1_NC_010870	aadA2b_1_D43625						cml_1_M22614			cmlA1_2_AB212941
ECL19555		aph(3'')-Ib_5_AF321551	aph(3')-Ia_1_V00359	aph(6)-Id_2_AF024602	mdf(A)_1_Y08743	sul2_3_HQ840942		tet(A)_6_AF534183
ECL19751	aac(3)-IV_1_DQ241380				mdf(A)_1_Y08743	sul2_9_FJ197818		tet(A)_6_AF534183	dfrA12_10_FM877486			sul1_11_DQ914960		aadA1_2_FJ591054	aadA24_1_DQ677333	aadA8b_1_AY139603			aadA2_1_NC_010870	aadA2b_1_D43625				tet(M)_5_U58985	tet(S/M)_1_HM367711
ECL19755	aac(3)-IV_1_DQ241380		aph(3')-Ia_1_V00359		mdf(A)_1_Y08743			tet(A)_6_AF534183	dfrA12_10_FM877486					aadA1_2_FJ591054	aadA24_1_DQ677333	aadA8b_1_AY139603			aadA2_1_NC_010870	aadA2b_1_D43625				tet(M)_8_X04388	tet(S/M)_1_HM367711
ECL19763	aac(3)-IV_1_DQ241380				mdf(A)_1_Y08743			tet(A)_6_AF534183				sul1_11_DQ914960																ant(2'')-Ia_12_HQ880250
ECL19885					mdf(A)_1_Y08743			tet(A)_6_AF534183						aadA1_3_JQ414041	aadA24_1_DQ677333	aadA8b_1_AY139603	ant(3'')-Ia_1_X02340		aadA2_1_NC_010870	aadA2b_1_D43625						cml_1_M22614			cmlA1_2_AB212941
ECL20408		aph(3'')-Ib_5_AF321551	aph(3')-Ia_1_V00359	aph(6)-Id_2_AF024602	mdf(A)_1_Y08743	sul2_3_HQ840942		tet(A)_6_AF534183
ECL20721		aph(3'')-Ib_5_AF321551	aph(3')-Ia_1_V00359	aph(6)-Id_2_AF024602	mdf(A)_1_Y08743	sul2_3_HQ840942		tet(A)_6_AF534183
ECL20906		aph(3'')-Ib_5_AF321551		aph(6)-Id_2_AF024602	mdf(A)_1_Y08743	sul2_9_FJ197818		tet(A)_6_AF534183																									dfrA14_4_AF393510
ECL21415					mdf(A)_1_Y08743							sul1_11_DQ914960																			aadA10_2_AM087405	aadA11_1_AY144590	dfrA14_4_AF393510
ECL21975		aph(3'')-Ib_5_AF321551	aph(3')-Ia_1_V00359	aph(6)-Id_2_AF024602	mdf(A)_1_Y08743	sul2_9_FJ197818		tet(A)_6_AF534183																									dfrA14_4_AF393510
ECL19664					mdf(A)_1_Y08743			tet(A)_6_AF534183
ECL19668					mdf(A)_1_Y08743			tet(A)_6_AF534183
ECL19916					mdf(A)_1_Y08743
ECL20013					mdf(A)_1_Y08743
ECL20014					mdf(A)_1_Y08743			tet(A)_6_AF534183
ECL20015					mdf(A)_1_Y08743			tet(A)_6_AF534183
ECL20018					mdf(A)_1_Y08743			tet(A)_6_AF534183
ECL20209					mdf(A)_1_Y08743			tet(A)_6_AF534183
ECL20212					mdf(A)_1_Y08743			tet(A)_6_AF534183
ECL20239					mdf(A)_1_Y08743	sul2_9_FJ197818		tet(A)_6_AF534183
ECL20256					mdf(A)_1_Y08743	sul2_9_FJ197818		tet(A)_6_AF534183
ECL20278					mdf(A)_1_Y08743			tet(A)_6_AF534183
ECL20290					mdf(A)_1_Y08743			tet(A)_6_AF534183
ECL20389					mdf(A)_1_Y08743			tet(A)_6_AF534183
ECL20404					mdf(A)_1_Y08743			tet(A)_6_AF534183
ECL20435			aph(3')-Ia_10_EU855787		mdf(A)_1_Y08743			tet(A)_6_AF534183	dfrA12_10_FM877486			sul1_11_DQ914960		aadA1_2_FJ591054	aadA24_1_DQ677333	aadA8b_1_AY139603			aadA2_2_JQ364967	aadA2b_1_D43625
ECL20436			aph(3')-Ia_10_EU855787		mdf(A)_1_Y08743			tet(A)_6_AF534183	dfrA12_10_FM877486			sul1_11_DQ914960		aadA1_2_FJ591054	aadA24_1_DQ677333	aadA8b_1_AY139603			aadA2_2_JQ364967	aadA2b_1_D43625
ECL20544		aph(3'')-Ib_5_AF321551		aph(6)-Id_2_AF024602	mdf(A)_1_Y08743	sul2_9_FJ197818		tet(A)_6_AF534183																									dfrA14_4_AF393510
ECL20566					mdf(A)_1_Y08743			tet(A)_6_AF534183				sul1_11_DQ914960																ant(2'')-Ia_12_HQ880250
ECL20622					mdf(A)_1_Y08743			tet(A)_6_AF534183
ECL20725	aac(3)-IV_1_DQ241380	aph(3'')-Ib_5_AF321551		aph(6)-Id_2_AF024602	mdf(A)_1_Y08743	sul2_9_FJ197818		tet(A)_6_AF534183						aadA1_3_JQ414041	aadA24_1_DQ677333	aadA8b_1_AY139603	ant(3'')-Ia_1_X02340		aadA2_1_NC_010870	aadA2b_1_D43625						cml_1_M22614			cmlA1_2_AB212941
ECL20769					mdf(A)_1_Y08743			tet(A)_6_AF534183																tet(M)_8_X04388	tet(S/M)_1_HM367711
ECL20776			aph(3')-Ia_10_EU855787		mdf(A)_1_Y08743			tet(A)_6_AF534183	dfrA12_10_FM877486			sul1_11_DQ914960		aadA1_2_FJ591054	aadA24_1_DQ677333	aadA8b_1_AY139603			aadA2_2_JQ364967	aadA2b_1_D43625
ECL20778	aac(3)-IV_1_DQ241380	aph(3'')-Ib_5_AF321551		aph(6)-Id_2_AF024602	mdf(A)_1_Y08743	sul2_3_HQ840942		tet(A)_6_AF534183	dfrA12_10_FM877486		mph(A)_1_D16251	sul1_11_DQ914960		aadA1_2_FJ591054	aadA24_1_DQ677333	aadA8b_1_AY139603			aadA2_2_JQ364967	aadA2b_1_D43625																erm(B)_1_JN899585
ECL20814					mdf(A)_1_Y08743			tet(A)_6_AF534183
ECL20836					mdf(A)_1_Y08743				dfrA12_10_FM877486					aadA1_3_JQ414041	aadA24_1_DQ677333	aadA8b_1_AY139603	ant(3'')-Ia_1_X02340		aadA2_1_NC_010870	aadA2b_1_D43625						cml_1_M22614			cmlA1_2_AB212941
ECL20846					mdf(A)_1_Y08743			tet(A)_6_AF534183
ECL20850	aac(3)-IV_1_DQ241380				mdf(A)_1_Y08743			tet(A)_6_AF534183
ECL20887					mdf(A)_1_Y08743			tet(A)_6_AF534183
ECL20911					mdf(A)_1_Y08743	sul2_9_FJ197818		tet(A)_6_AF534183
ECL20918	aac(3)-IV_1_DQ241380				mdf(A)_1_Y08743			tet(A)_6_AF534183						aadA1_3_JQ414041	aadA24_1_DQ677333	aadA8b_1_AY139603	ant(3'')-Ia_1_X02340		aadA2_1_NC_010870	aadA2b_1_D43625						cml_1_M22614			cmlA1_2_AB212941
ECL20924					mdf(A)_1_Y08743			tet(A)_6_AF534183
ECL21259					mdf(A)_1_Y08743	sul2_9_FJ197818		tet(A)_6_AF534183
ECL21274					mdf(A)_1_Y08743	sul2_9_FJ197818		tet(A)_6_AF534183
ECL21290					mdf(A)_1_Y08743			tet(A)_6_AF534183
ECL21405		aph(3'')-Ib_5_AF321551	aph(3')-Ia_1_V00359	aph(6)-Id_2_AF024602	mdf(A)_1_Y08743	sul2_3_HQ840942		tet(A)_6_AF534183	dfrA12_10_FM877486	floR_2_AF118107		sul1_11_DQ914960		aadA1_2_FJ591054	aadA24_1_DQ677333	aadA8b_1_AY139603			aadA2_2_JQ364967	aadA2b_1_D43625
ECL21412	aac(3)-IV_1_DQ241380	aph(3'')-Ib_5_AF321551		aph(6)-Id_2_AF024602	mdf(A)_1_Y08743	sul2_9_FJ197818		tet(A)_6_AF534183	dfrA12_10_FM877486	floR_2_AF118107		sul1_11_DQ914960		aadA1_2_FJ591054	aadA24_1_DQ677333	aadA8b_1_AY139603			aadA2_2_JQ364967	aadA2b_1_D43625
ECL21483		aph(3'')-Ib_5_AF321551		aph(6)-Id_2_AF024602	mdf(A)_1_Y08743	sul2_13_AJ28913				floR_2_AF118107		sul1_14_AJ517791															dfrA1_12_AY141977
ECL21505	aac(3)-IV_1_DQ241380				mdf(A)_1_Y08743	sul2_9_FJ197818		tet(A)_6_AF534183
ECL21512	aac(3)-IV_1_DQ241380				mdf(A)_1_Y08743			tet(A)_6_AF534183						aadA1_3_JQ414041	aadA24_1_DQ677333	aadA8b_1_AY139603	ant(3'')-Ia_1_X02340		aadA2_1_NC_010870	aadA2b_1_D43625						cml_1_M22614			cmlA1_2_AB212941
ECL21541	aac(3)-IV_1_DQ241380	aph(3'')-Ib_5_AF321551		aph(6)-Id_2_AF024602	mdf(A)_1_Y08743	sul2_9_FJ197818		tet(A)_6_AF534183	dfrA12_10_FM877486	floR_2_AF118107		sul1_11_DQ914960		aadA1_2_FJ591054	aadA24_1_DQ677333	aadA8b_1_AY139603			aadA2_2_JQ364967	aadA2b_1_D43625
ECL21542			aph(3')-Ia_10_EU855787		mdf(A)_1_Y08743			tet(A)_6_AF534183	dfrA12_10_FM877486			sul1_11_DQ914960		aadA1_2_FJ591054	aadA24_1_DQ677333	aadA8b_1_AY139603			aadA2_2_JQ364967	aadA2b_1_D43625
ECL21551					mdf(A)_1_Y08743			tet(A)_6_AF534183																				ant(2'')-Ia_12_HQ880250
ECL21628			aph(3')-Ia_1_V00359		mdf(A)_1_Y08743			tet(A)_6_AF534183			mph(A)_1_D16251			aadA1_3_JQ414041	aadA24_1_DQ677333	aadA8b_1_AY139603	ant(3'')-Ia_1_X02340		aadA2_1_NC_010870	aadA2b_1_D43625	aac(3)-IIa_2_AY1389			tet(M)_5_U58985	tet(S/M)_1_HM367711	cml_1_M22614			cmlA1_2_AB212941
ECL21652			aph(3')-Ia_10_EU855787		mdf(A)_1_Y08743			tet(A)_6_AF534183	dfrA12_10_FM877486			sul1_11_DQ914960		aadA1_2_FJ591054	aadA24_1_DQ677333	aadA8b_1_AY139603			aadA2_2_JQ364967	aadA2b_1_D43625
ECL21655		aph(3'')-Ib_5_AF321551	aph(3')-Ia_1_V00359	aph(6)-Id_2_AF024602	mdf(A)_1_Y08743	sul2_9_FJ197818		tet(A)_6_AF534183		floR_2_AF118107		sul1_10_DQ143913														cml_1_M22614	dfrA1_12_AY141977	ant(2'')-Ia_12_HQ880250	cmlA1_2_AB212941
ECL21657			aph(3')-Ia_10_EU855787		mdf(A)_1_Y08743			tet(A)_6_AF534183	dfrA12_10_FM877486			sul1_11_DQ914960		aadA1_2_FJ591054	aadA24_1_DQ677333	aadA8b_1_AY139603			aadA2_2_JQ364967	aadA2b_1_D43625
ECL21676			aph(3')-Ia_10_EU855787		mdf(A)_1_Y08743			tet(A)_6_AF534183	dfrA12_10_FM877486			sul1_11_DQ914960		aadA1_2_FJ591054	aadA24_1_DQ677333	aadA8b_1_AY139603			aadA2_2_JQ364967	aadA2b_1_D43625
ECL21680					mdf(A)_1_Y08743			tet(A)_6_AF534183
ECL21730					mdf(A)_1_Y08743			tet(A)_6_AF534183
ECL21837					mdf(A)_1_Y08743			tet(A)_6_AF534183
ECL21979	aac(3)-IV_1_DQ241380	aph(3'')-Ib_5_AF321551		aph(6)-Id_2_AF024602	mdf(A)_1_Y08743	sul2_9_FJ197818		tet(A)_6_AF534183	dfrA12_10_FM877486	floR_2_AF118107		sul1_11_DQ914960		aadA1_2_FJ591054	aadA24_1_DQ677333	aadA8b_1_AY139603			aadA2_2_JQ364967	aadA2b_1_D43625
ECL22052			aph(3')-Ia_3_EF015636	aph(6)-Id_4_CP000971	mdf(A)_1_Y08743			tet(A)_6_AF534183						aadA1_3_JQ414041	aadA24_1_DQ677333	aadA8b_1_AY139603	ant(3'')-Ia_1_X02340							tet(M)_5_U58985	tet(S/M)_1_HM367711
ECL22093	aac(3)-IV_1_DQ241380		aph(3')-Ia_9_EU722351		mdf(A)_1_Y08743			tet(A)_6_AF534183																tet(M)_5_U58985	tet(S/M)_1_HM367711
ECL22099					mdf(A)_1_Y08743
ECL22128					mdf(A)_1_Y08743	sul2_9_FJ197818		tet(A)_6_AF534183																tet(M)_5_U58985	tet(S/M)_1_HM367711		dfrA1_10_AF203818
ECL22215	aac(3)-IV_1_DQ241380	aph(3'')-Ib_2_AF024602		aph(6)-Id_2_AF024602	mdf(A)_1_Y08743		tet(B)_2_AF326777	tet(A)_6_AF534183						aadA1_4_JQ480156	aadA24_1_DQ677333	aadA8b_1_AY139603	ant(3'')-Ia_1_X02340		aadA2_1_NC_010870	aadA2b_1_D43625						cml_1_M22614			cmlA1_2_AB212941
ECL22265	aac(3)-IV_1_DQ241380	aph(3'')-Ib_2_AF024602		aph(6)-Id_2_AF024602	mdf(A)_1_Y08743		tet(B)_2_AF326777							aadA1_3_JQ414041	aadA24_1_DQ677333	aadA8b_1_AY139603	ant(3'')-Ia_1_X02340		aadA2_1_NC_010870	aadA2b_1_D43625						cml_1_M22614			cmlA1_2_AB212941
ECL22274					mdf(A)_1_Y08743			tet(A)_6_AF534183
ECL22293					mdf(A)_1_Y08743			tet(A)_6_AF534183
ECL22298					mdf(A)_1_Y08743			tet(A)_6_AF534183
ECL22433	aac(3)-IV_1_DQ241380	aph(3'')-Ib_2_AF024602		aph(6)-Id_2_AF024602	mdf(A)_1_Y08743		tet(B)_2_AF326777
ECL22438	aac(3)-IV_1_DQ241380	aph(3'')-Ib_5_AF321551		aph(6)-Id_2_AF024602	mdf(A)_1_Y08743	sul2_9_FJ197818		tet(A)_6_AF534183	dfrA12_10_FM877486	floR_2_AF118107		sul1_11_DQ914960		aadA1_2_FJ591054	aadA24_1_DQ677333	aadA8b_1_AY139603			aadA2_2_JQ364967	aadA2b_1_D43625
ECL22447	aac(3)-IV_1_DQ241380				mdf(A)_1_Y08743	sul2_9_FJ197818		tet(A)_6_AF534183																tet(M)_5_U58985	tet(S/M)_1_HM367711
ECL22491	aac(3)-IV_1_DQ241380				mdf(A)_1_Y08743			tet(A)_6_AF534183						aadA1_3_JQ414041	aadA24_1_DQ677333	aadA8b_1_AY139603	ant(3'')-Ia_1_X02340		aadA2_1_NC_010870	aadA2b_1_D43625						cml_1_M22614			cmlA1_2_AB212941
ECL22503					mdf(A)_1_Y08743			tet(A)_6_AF534183
ECL22505					mdf(A)_1_Y08743			tet(A)_6_AF534183
ECL22553					mdf(A)_1_Y08743
ECL22800					mdf(A)_1_Y08743
ECL22887					mdf(A)_1_Y08743			tet(A)_6_AF534183																tet(M)_8_X04388	tet(S/M)_1_HM367711
ECL22967	aac(3)-IV_1_DQ241380	aph(3'')-Ib_5_AF321551		aph(6)-Id_2_AF024602	mdf(A)_1_Y08743	sul2_9_FJ197818		tet(A)_6_AF534183	dfrA12_10_FM877486	floR_2_AF118107		sul1_11_DQ914960		aadA1_2_FJ591054	aadA24_1_DQ677333	aadA8b_1_AY139603			aadA2_2_JQ364967	aadA2b_1_D43625
ECL23013		aph(3'')-Ib_5_AF321551	aph(3')-Ia_1_V00359	aph(6)-Id_2_AF024602	mdf(A)_1_Y08743	sul2_9_FJ197818		tet(A)_6_AF534183	dfrA12_10_FM877486	floR_2_AF118107	mph(A)_1_D16251	sul1_11_DQ914960		aadA1_2_FJ591054	aadA24_1_DQ677333	aadA8b_1_AY139603			aadA2_2_JQ364967	aadA2b_1_D43625	aac(3)-IIa_4_L22613
ECL23067					mdf(A)_1_Y08743
ECL07805					mdf(A)_1_Y08743			tet(A)_6_AF534183				sul1_11_DQ914960		aadA1_3_JQ414041	aadA24_1_DQ677333	aadA8b_1_AY139603	ant(3'')-Ia_1_X02340
ECL09114		aph(3'')-Ib_5_AF321551		aph(6)-Id_2_AF024602	mdf(A)_1_Y08743	sul2_9_FJ197818		tet(A)_6_AF534183																									dfrA14_4_AF393510	tet(D)_2_X65876
ECL10170					mdf(A)_1_Y08743	sul2_9_FJ197818		tet(A)_6_AF534183				sul1_11_DQ914960		aadA1_3_JQ414041	aadA24_1_DQ677333	aadA8b_1_AY139603	ant(3'')-Ia_1_X02340		aadA2_1_NC_010870	aadA2b_1_D43625							dfrA1_12_AY141977
ECL11324					mdf(A)_1_Y08743			tet(A)_6_AF534183				sul1_11_DQ914960		aadA1_3_JQ414041	aadA24_1_DQ677333	aadA8b_1_AY139603	ant(3'')-Ia_1_X02340
ECL13086	aac(3)-IV_1_DQ241380	aph(3'')-Ib_5_AF321551	aph(3')-Ia_1_V00359	aph(6)-Id_2_AF024602	mdf(A)_1_Y08743	sul2_9_FJ197818		tet(A)_6_AF534183		floR_2_AF118107		sul1_10_DQ143913	aac(3)-VIa_2_NC_009838	aadA1_3_JQ414041	aadA24_1_DQ677333	aadA8b_1_AY139603	ant(3'')-Ia_1_X02340									cml_1_M22614	dfrA1_10_AF203818	ant(2'')-Ia_12_HQ880250	cmlA1_2_AB212941
ECL13345	aac(3)-IV_1_DQ241380	aph(3'')-Ib_2_AF024602		aph(6)-Id_2_AF024602	mdf(A)_1_Y08743			tet(A)_6_AF534183
ECL18172					mdf(A)_1_Y08743			tet(A)_6_AF534183
ECL18728					mdf(A)_1_Y08743			tet(A)_6_AF534183						aadA1_3_JQ414041	aadA24_1_DQ677333	aadA8b_1_AY139603	ant(3'')-Ia_1_X02340		aadA2_1_NC_010870	aadA2b_1_D43625						cml_1_M22614			cmlA1_2_AB212941
ECL19517					mdf(A)_1_Y08743
ECL22741			aph(3')-Ia_8_Y00452		mdf(A)_1_Y08743
ECL85531		aph(3'')-Ib_5_AF321551	aph(3')-Ia_1_V00359	aph(6)-Id_2_AF024602	mdf(A)_1_Y08743	sul2_9_FJ197818		tet(A)_3_AY196695	dfrA12_10_FM877486		mph(A)_1_D16251	sul1_11_DQ914960		aadA1_3_JQ414041	aadA24_1_DQ677333	aadA8b_1_AY139603	ant(3'')-Ia_1_X02340		aadA2_1_NC_010870	aadA2b_1_D43625						cml_1_M22614			cmlA1_2_AB212941
ECL00351					mdf(A)_1_Y08743							sul1_11_DQ914960																			aadA10_2_AM087405	aadA11_1_AY144590	dfrA14_4_AF393510
ECL00652		aph(3'')-Ib_2_AF024602	aph(3')-Ia_3_EF015636	aph(6)-Id_2_AF024602	mdf(A)_1_Y08743	sul2_3_HQ840942		tet(A)_6_AF534183				sul1_11_DQ914960																			aadA10_2_AM087405	aadA11_1_AY144590	dfrA14_4_AF393510
ECL09646					mdf(A)_1_Y08743			tet(A)_6_AF534183				sul1_11_DQ914960																			aadA10_2_AM087405	aadA11_1_AY144590	dfrA14_4_AF393510
ECL10647		aph(3'')-Ib_2_AF024602		aph(6)-Id_2_AF024602	mdf(A)_1_Y08743	sul2_9_FJ197818	tet(B)_2_AF326777					sul1_11_DQ914960												tet(M)_5_U58985	tet(S/M)_1_HM367711						aadA10_2_AM087405	aadA11_1_AY144590	dfrA14_4_AF393510
ECL11171		aph(3'')-Ib_5_AF321551		aph(6)-Id_2_AF024602	mdf(A)_1_Y08743	sul2_3_HQ840942		tet(A)_6_AF534183	dfrA12_10_FM877486		mph(A)_1_D16251	sul1_11_DQ914960		aadA1_2_FJ591054	aadA24_1_DQ677333	aadA8b_1_AY139603			aadA2_2_JQ364967	aadA2b_1_D43625	aac(3)-IIa_4_L22613										aadA10_2_AM087405	aadA11_1_AY144590	dfrA14_4_AF393510
ECL14048		aph(3'')-Ib_5_AF321551		aph(6)-Id_2_AF024602	mdf(A)_1_Y08743	sul2_3_HQ840942		tet(A)_6_AF534183				sul1_11_DQ914960																			aadA10_2_AM087405	aadA11_1_AY144590	dfrA14_4_AF393510
ECL18573		aph(3'')-Ib_5_AF321551		aph(6)-Id_2_AF024602	mdf(A)_1_Y08743	sul2_3_HQ840942		tet(A)_6_AF534183				sul1_11_DQ914960																			aadA10_2_AM087405	aadA11_1_AY144590	dfrA14_4_AF393510
ECL19125				aph(6)-Id_2_AF024602	mdf(A)_1_Y08743
ECL19187		aph(3'')-Ib_5_AF321551		aph(6)-Id_2_AF024602	mdf(A)_1_Y08743	sul2_3_HQ840942		tet(A)_6_AF534183				sul1_11_DQ914960																			aadA10_2_AM087405	aadA11_1_AY144590	dfrA14_4_AF393510
ECL19345					mdf(A)_1_Y08743			tet(A)_6_AF534183				sul1_11_DQ914960	aac(3)-VIa_2_NC_009838	aadA1_3_JQ414041	aadA24_1_DQ677333	aadA8b_1_AY139603	ant(3'')-Ia_1_X02340														aadA10_2_AM087405	aadA11_1_AY144590	dfrA14_4_AF393510
ECL19403		aph(3'')-Ib_5_AF321551		aph(6)-Id_2_AF024602	mdf(A)_1_Y08743	sul2_9_FJ197818		tet(A)_6_AF534183		floR_2_AF118107		sul1_11_DQ914960		aadA1_3_JQ414041	aadA24_1_DQ677333	aadA8b_1_AY139603	ant(3'')-Ia_1_X02340														aadA10_2_AM087405	aadA11_1_AY144590	dfrA14_4_AF393510
ECL19889		aph(3'')-Ib_5_AF321551	aph(3')-Ia_9_EU722351	aph(6)-Id_2_AF024602	mdf(A)_1_Y08743	sul2_9_FJ197818		tet(A)_6_AF534183		floR_2_AF118107		sul1_11_DQ914960		aadA1_3_JQ414041	aadA24_1_DQ677333	aadA8b_1_AY139603	ant(3'')-Ia_1_X02340							tet(M)_5_U58985	tet(S/M)_1_HM367711						aadA10_2_AM087405	aadA11_1_AY144590	dfrA14_4_AF393510
ECL19901					mdf(A)_1_Y08743				dfrA12_10_FM877486					aadA1_3_JQ414041	aadA24_1_DQ677333	aadA8b_1_AY139603	ant(3'')-Ia_1_X02340		aadA2_2_JQ364967	aadA2b_1_D43625						cml_1_M22614			cmlA1_2_AB212941
ECL19902					mdf(A)_1_Y08743			tet(A)_6_AF534183	dfrA12_10_FM877486					aadA1_3_JQ414041	aadA24_1_DQ677333	aadA8b_1_AY139603	ant(3'')-Ia_1_X02340		aadA2_2_JQ364967	aadA2b_1_D43625				tet(M)_8_X04388	tet(S/M)_1_HM367711	cml_1_M22614			cmlA1_2_AB212941
ECL19508		aph(3'')-Ib_2_AF024602		aph(6)-Id_2_AF024602	mdf(A)_1_Y08743	sul2_3_HQ840942	tet(B)_2_AF326777	tet(A)_6_AF534183						aadA1_4_JQ480156	aadA24_1_DQ677333	aadA8b_1_AY139603	ant(3'')-Ia_1_X02340
ECL19641					mdf(A)_1_Y08743	sul2_9_FJ197818	tet(B)_2_AF326777							aadA1_4_JQ480156	aadA24_1_DQ677333	aadA8b_1_AY139603	ant(3'')-Ia_1_X02340
ECL19894					mdf(A)_1_Y08743	sul2_9_FJ197818	tet(B)_2_AF326777							aadA1_4_JQ480156	aadA24_1_DQ677333	aadA8b_1_AY139603	ant(3'')-Ia_1_X02340
ECL19939					mdf(A)_1_Y08743	sul2_9_FJ197818	tet(B)_2_AF326777							aadA1_4_JQ480156	aadA24_1_DQ677333	aadA8b_1_AY139603	ant(3'')-Ia_1_X02340
ECL20308		aph(3'')-Ib_2_AF024602	aph(3')-Ia_9_EU722351	aph(6)-Id_2_AF024602	mdf(A)_1_Y08743	sul2_3_HQ840942	tet(B)_2_AF326777	tet(A)_6_AF534183						aadA1_4_JQ480156	aadA24_1_DQ677333	aadA8b_1_AY139603	ant(3'')-Ia_1_X02340
ECL20550					mdf(A)_1_Y08743	sul2_9_FJ197818	tet(B)_2_AF326777					sul1_11_DQ914960		aadA1_4_JQ480156	aadA24_1_DQ677333	aadA8b_1_AY139603	ant(3'')-Ia_1_X02340											ant(2'')-Ia_12_HQ880250
ECL21584		aph(3'')-Ib_5_AF321551	aph(3')-Ia_10_EU855787	aph(6)-Id_2_AF024602	mdf(A)_1_Y08743	sul2_9_FJ197818	tet(B)_2_AF326777			floR_2_AF118107				aadA1_4_JQ480156	aadA24_1_DQ677333	aadA8b_1_AY139603	ant(3'')-Ia_1_X02340
ECL22487	aac(3)-IV_1_DQ241380				mdf(A)_1_Y08743	sul2_9_FJ197818	tet(B)_2_AF326777							aadA1_4_JQ480156	aadA24_1_DQ677333	aadA8b_1_AY139603	ant(3'')-Ia_1_X02340							tet(M)_5_U58985	tet(S/M)_1_HM367711
ECL20627					mdf(A)_1_Y08743			tet(A)_6_AF534183
ECL20896	aac(3)-IV_1_DQ241380				mdf(A)_1_Y08743			tet(A)_6_AF534183						aadA1_3_JQ414041	aadA24_1_DQ677333	aadA8b_1_AY139603	ant(3'')-Ia_1_X02340		aadA2_1_NC_010870	aadA2b_1_D43625						cml_1_M22614			cmlA1_2_AB212941
ECL21518					mdf(A)_1_Y08743			tet(A)_6_AF534183
ECL22134					mdf(A)_1_Y08743			tet(A)_6_AF534183
ECL22536			aph(3')-Ia_9_EU722351		mdf(A)_1_Y08743			tet(A)_6_AF534183
ECL22867					mdf(A)_1_Y08743			tet(A)_6_AF534183
ECL22868					mdf(A)_1_Y08743			tet(A)_6_AF534183
SRR11045320					mdf(A)_1_Y08743			tet(A)_6_AF534183
SRR11045323					mdf(A)_1_Y08743			tet(A)_6_AF534183
SRR11045324					mdf(A)_1_Y08743			tet(A)_6_AF534183
SRR11046294			aph(3')-Ia_1_V00359		mdf(A)_1_Y08743	sul2_9_FJ197818			dfrA12_10_FM877486	floR_2_AF118107	mph(A)_1_D16251	sul1_11_DQ914960
SRR11046297					mdf(A)_1_Y08743			tet(A)_6_AF534183
SRR11046300					mdf(A)_1_Y08743			tet(A)_6_AF534183
SRR11046301					mdf(A)_1_Y08743			tet(A)_6_AF534183					aac(3)-VIa_2_NC_009838	aadA1_3_JQ414041	aadA24_1_DQ677333	aadA8b_1_AY139603	ant(3'')-Ia_1_X02340	dfrA15_2_AF221900
SRR11046303			aph(3')-Ia_1_V00359		mdf(A)_1_Y08743			tet(A)_6_AF534183	dfrA12_10_FM877486					aadA1_2_FJ591054	aadA24_1_DQ677333	aadA8b_1_AY139603			aadA2_2_JQ364967	aadA2b_1_D43625
SRR11046874					mdf(A)_1_Y08743
SRR11046875					mdf(A)_1_Y08743			tet(A)_6_AF534183
SRR11046877					mdf(A)_1_Y08743			tet(A)_6_AF534183
SRR11046878					mdf(A)_1_Y08743					floR_2_AF118107
SRR11047446		aph(3'')-Ib_5_AF321551	aph(3')-Ia_1_V00359	aph(6)-Id_2_AF024602	mdf(A)_1_Y08743	sul2_9_FJ197818	tet(B)_2_AF326777	tet(A)_6_AF534183		floR_2_AF118107	mph(A)_1_D16251	sul1_11_DQ914960		aadA1_2_FJ591054	aadA24_1_DQ677333	aadA8b_1_AY139603	ant(3'')-Ia_1_X02340		aadA2_1_NC_010870	aadA2b_1_D43625	aac(3)-IIa_4_L22613	mph(E)_1_DQ839391	papA_F20:24:CP019944
SRR11048585			aph(3')-Ia_10_EU855787		mdf(A)_1_Y08743			tet(A)_6_AF534183				sul1_11_DQ914960	aac(3)-VIa_2_NC_009838	aadA1_3_JQ414041	aadA24_1_DQ677333	aadA8b_1_AY139603	ant(3'')-Ia_1_X02340							tet(M)_5_U58985	tet(S/M)_1_HM367711
SRR11048588					mdf(A)_1_Y08743			tet(A)_6_AF534183
SRR11048592	aac(3)-IV_1_DQ241380		aph(3')-Ia_3_EF015636		mdf(A)_1_Y08743			tet(A)_6_AF534183				sul1_10_DQ143913		aadA1_3_JQ414041	aadA24_1_DQ677333	aadA8b_1_AY139603	ant(3'')-Ia_1_X02340		aadA2_1_NC_010870	aadA2b_1_D43625						cml_1_M22614	dfrA1_12_AY141977
SRR11048595					mdf(A)_1_Y08743			tet(A)_6_AF534183
SRR11048596					mdf(A)_1_Y08743			tet(A)_6_AF534183
SRR11074150					mdf(A)_1_Y08743			tet(A)_6_AF534183
SRR11074152		aph(3'')-Ib_5_AF321551	aph(3')-Ia_1_V00359	aph(6)-Id_2_AF024602	mdf(A)_1_Y08743	sul2_9_FJ197818		tet(A)_6_AF534183	dfrA12_10_FM877486	floR_2_AF118107		sul1_11_DQ914960	aac(3)-VIa_2_NC_009838	aadA1_2_FJ591054	aadA24_1_DQ677333	aadA8b_1_AY139603	ant(3'')-Ia_1_X02340		aadA2_2_JQ364967	aadA2b_1_D43625
SRR11074153					mdf(A)_1_Y08743			tet(A)_6_AF534183
SRR11074174					mdf(A)_1_Y08743			tet(A)_6_AF534183
SRR11074676					mdf(A)_1_Y08743			tet(A)_6_AF534183					aac(3)-VIa_2_NC_009838	aadA1_3_JQ414041	aadA24_1_DQ677333	aadA8b_1_AY139603	ant(3'')-Ia_1_X02340	dfrA15_2_AF221900
SRR11074677					mdf(A)_1_Y08743			tet(A)_6_AF534183
SRR11074679			aph(3')-Ia_9_EU722351		mdf(A)_1_Y08743			tet(A)_6_AF534183
SRR11074680			aph(3')-Ia_9_EU722351		mdf(A)_1_Y08743			tet(A)_6_AF534183
SRR11074681			aph(3')-Ia_1_V00359		mdf(A)_1_Y08743			tet(A)_6_AF534183	dfrA12_10_FM877486					aadA1_2_FJ591054	aadA24_1_DQ677333	aadA8b_1_AY139603			aadA2_2_JQ364967	aadA2b_1_D43625
SRR11074684		aph(3'')-Ib_5_AF321551		aph(6)-Id_2_AF024602	mdf(A)_1_Y08743	sul2_9_FJ197818		tet(A)_6_AF534183						aadA1_3_JQ414041	aadA24_1_DQ677333	aadA8b_1_AY139603	ant(3'')-Ia_1_X02340		aadA2_1_NC_010870	aadA2b_1_D43625						cml_1_M22614		ant(2'')-Ia_12_HQ880250	cmlA1_2_AB212941
SRR11074686		aph(3'')-Ib_5_AF321551		aph(6)-Id_2_AF024602	mdf(A)_1_Y08743	sul2_9_FJ197818		tet(A)_6_AF534183		floR_2_AF118107		sul1_11_DQ914960	aac(3)-VIa_2_NC_009838	aadA1_3_JQ414041	aadA24_1_DQ677333							mph(E)_1_DQ839391
SRR11074688			aph(3')-Ia_9_EU722351		mdf(A)_1_Y08743			tet(A)_6_AF534183
SRR11074697		aph(3'')-Ib_5_AF321551	aph(3')-Ia_1_V00359	aph(6)-Id_2_AF024602	mdf(A)_1_Y08743	sul2_9_FJ197818		tet(A)_6_AF534183		floR_2_AF118107		sul1_11_DQ914960	aac(3)-VIa_2_NC_009838	aadA1_3_JQ414041	aadA24_1_DQ677333									tet(M)_5_U58985	tet(S/M)_1_HM367711					dfrA34_1_JYRF01000065
SRR11074704			aph(3')-Ia_9_EU722351		mdf(A)_1_Y08743			tet(A)_6_AF534183						aadA1_3_JQ414041	aadA24_1_DQ677333	aadA8b_1_AY139603	ant(3'')-Ia_1_X02340		aadA2_1_NC_010870	aadA2b_1_D43625	aac(3)-IIa_4_L22613			tet(M)_5_U58985	tet(S/M)_1_HM367711	cml_1_M22614			cmlA1_2_AB212941
SRR11074708		aph(3'')-Ib_5_AF321551	aph(3')-Ia_1_V00359	aph(6)-Id_2_AF024602	mdf(A)_1_Y08743	sul2_9_FJ197818		tet(A)_6_AF534183		floR_2_AF118107		sul1_11_DQ914960	aac(3)-VIa_2_NC_009838	aadA1_2_FJ591054	aadA24_1_DQ677333	aadA8b_1_AY139603	ant(3'')-Ia_1_X02340		aadA2_1_NC_010870	aadA2b_1_D43625
SRR11074710					mdf(A)_1_Y08743			tet(A)_6_AF534183
SRR11074716	aac(3)-IV_1_DQ241380		aph(3')-Ia_9_EU722351		mdf(A)_1_Y08743			tet(A)_6_AF534183						aadA1_3_JQ414041	aadA24_1_DQ677333	aadA8b_1_AY139603	ant(3'')-Ia_1_X02340		aadA2_1_NC_010870	aadA2b_1_D43625						cml_1_M22614			cmlA1_2_AB212941
SRR6121969					mdf(A)_1_Y08743			tet(A)_6_AF534183
SRR7213569		aph(3'')-Ib_5_AF321551	aph(3')-Ia_8_Y00452	aph(6)-Id_2_AF024602	mdf(A)_1_Y08743	sul2_9_FJ197818		tet(A)_6_AF534183		floR_2_AF118107		sul1_11_DQ914960										mph(E)_1_DQ839391					dfrA1_10_AF203818
SRR7213570					mdf(A)_1_Y08743			tet(A)_6_AF534183
SRR7213571					mdf(A)_1_Y08743			tet(A)_6_AF534183						aadA1_3_JQ414041	aadA24_1_DQ677333	aadA8b_1_AY139603	ant(3'')-Ia_1_X02340		aadA2_1_NC_010870	aadA2b_1_D43625						cml_1_M22614			cmlA1_2_AB212941
SRR7213572					mdf(A)_1_Y08743	sul2_9_FJ197818		tet(A)_6_AF534183				sul1_11_DQ914960										mph(E)_1_DQ839391									aadA10_2_AM087405	aadA11_1_AY144590	dfrA14_4_AF393510	tet(D)_2_X65876
SRR7213573					mdf(A)_1_Y08743			tet(A)_6_AF534183
SRR7213575					mdf(A)_1_Y08743			tet(A)_6_AF534183
SRR7213576					mdf(A)_1_Y08743			tet(A)_6_AF534183
SRR7213578					mdf(A)_1_Y08743			tet(A)_6_AF534183
SRR7213579					mdf(A)_1_Y08743
SRR7213581					mdf(A)_1_Y08743			tet(A)_6_AF534183
SRR7213583					mdf(A)_1_Y08743			tet(A)_6_AF534183
SRR7213588					mdf(A)_1_Y08743			tet(A)_6_AF534183
SRR7213590					mdf(A)_1_Y08743			tet(A)_6_AF534183
SRR7213593			aph(3')-Ia_10_EU855787		mdf(A)_1_Y08743			tet(A)_6_AF534183
SRR7213595					mdf(A)_1_Y08743			tet(A)_6_AF534183
SRR7213596		aph(3'')-Ib_5_AF321551	aph(3')-Ia_10_EU855787	aph(6)-Id_2_AF024602	mdf(A)_1_Y08743	sul2_9_FJ197818		tet(A)_6_AF534183		floR_2_AF118107		sul1_11_DQ914960	aac(3)-VIa_2_NC_009838	aadA1_3_JQ414041	aadA24_1_DQ677333	aadA8b_1_AY139603	ant(3'')-Ia_1_X02340
SRR7213597					mdf(A)_1_Y08743			tet(A)_6_AF534183
SRR7213598					mdf(A)_1_Y08743	sul2_9_FJ197818		tet(A)_6_AF534183
SRR7213599	aac(3)-IV_1_DQ241380		aph(3')-Ia_3_EF015636		mdf(A)_1_Y08743			tet(A)_6_AF534183	dfrA12_10_FM877486			sul1_11_DQ914960		aadA1_2_FJ591054	aadA24_1_DQ677333	aadA8b_1_AY139603			aadA2_2_JQ364967	aadA2b_1_D43625
SRR7213600					mdf(A)_1_Y08743			tet(A)_6_AF534183
SRR7213602		aph(3'')-Ib_5_AF321551	aph(3')-Ia_1_V00359	aph(6)-Id_2_AF024602	mdf(A)_1_Y08743	sul2_9_FJ197818		tet(A)_6_AF534183		floR_2_AF118107
SRR7213603					mdf(A)_1_Y08743
SRR7213606					mdf(A)_1_Y08743			tet(A)_6_AF534183
SRR7213607			aph(3')-Ia_10_EU855787		mdf(A)_1_Y08743			tet(A)_6_AF534183
SRR7213608					mdf(A)_1_Y08743			tet(A)_6_AF534183
SRR7213623					mdf(A)_1_Y08743			tet(A)_6_AF534183
SRR7213658		aph(3'')-Ib_5_AF321551	aph(3')-Ia_1_V00359	aph(6)-Id_2_AF024602	mdf(A)_1_Y08743	sul2_20_AJ83071		tet(A)_6_AF534183		floR_2_AF118107		sul1_11_DQ914960	aac(3)-VIa_2_NC_009838	aadA1_2_FJ591054	aadA24_1_DQ677333	aadA8b_1_AY139603	ant(3'')-Ia_1_X02340		aadA2_1_NC_010870	aadA2b_1_D43625
SRR7213659			aph(3')-Ia_10_EU855787		mdf(A)_1_Y08743			tet(A)_6_AF534183
SRR7213660		aph(3'')-Ib_5_AF321551	aph(3')-Ia_8_Y00452	aph(6)-Id_2_AF024602	mdf(A)_1_Y08743	sul2_9_FJ197818		tet(A)_6_AF534183		floR_2_AF118107		sul1_11_DQ914960		aadA1_3_JQ414041	aadA24_1_DQ677333	aadA8b_1_AY139603	ant(3'')-Ia_1_X02340				aac(3)-IIa_2_AY1389														tet(C)_2_AY046276
SRR8157048					mdf(A)_1_Y08743			tet(A)_4_AJ517790				sul1_11_DQ914960		aadA1_3_JQ414041	aadA24_1_DQ677333	aadA8b_1_AY139603	ant(3'')-Ia_1_X02340									cml_1_M22614			cmlA1_2_AB212941		aadA10_2_AM087405	aadA11_1_AY144590	dfrA14_4_AF393510
SRR8901382					mdf(A)_1_Y08743			tet(A)_6_AF534183
SRR8901386					mdf(A)_1_Y08743			tet(A)_6_AF534183
SRR8901388					mdf(A)_1_Y08743																														tet(C)_2_AY046276
SRR8901392					mdf(A)_1_Y08743			tet(A)_6_AF534183
SRR8901396		aph(3'')-Ib_5_AF321551		aph(6)-Id_2_AF024602	mdf(A)_1_Y08743	sul2_3_HQ840942	tet(B)_2_AF326777		dfrA12_10_FM877486		mph(A)_1_D16251	sul1_11_DQ914960		aadA1_2_FJ591054	aadA24_1_DQ677333	aadA8b_1_AY139603			aadA2_2_JQ364967	aadA2b_1_D43625	aac(3)-IIa_4_L22613
SRR8901397					mdf(A)_1_Y08743			tet(A)_6_AF534183
SRR8901398	aac(3)-IV_1_DQ241380	aph(3'')-Ib_2_AF024602		aph(6)-Id_2_AF024602	mdf(A)_1_Y08743		tet(B)_2_AF326777	tet(A)_6_AF534183																												erm(B)_1_JN899585
SRR8901402					mdf(A)_1_Y08743			tet(A)_6_AF534183
SRR8901404					mdf(A)_1_Y08743			tet(A)_6_AF534183																													qnrB1_1_DQ351241	qnrB10_2_HM439644	qnrB13_1_EU273755	qnrB14_1_EU273757	qnrB15_1_EU302865	qnrB16_1_EU136183	qnrB17_2_AM919398	qnrB18_1_AM919399	qnrB20_1_AB379831	qnrB23_1_FJ981622	qnrB24_1_HM192542	qnrB26_1_HQ386846	qnrB29_1_HM439649
SRR8901430			aph(3')-Ia_1_V00359		mdf(A)_1_Y08743			tet(A)_6_AF534183	dfrA12_10_FM877486					aadA1_2_FJ591054	aadA24_1_DQ677333	aadA8b_1_AY139603			aadA2_2_JQ364967	aadA2b_1_D43625
SRR8901439			aph(3')-Ia_8_Y00452		mdf(A)_1_Y08743			tet(A)_6_AF534183				sul1_11_DQ914960		aadA1_3_JQ414041	aadA24_1_DQ677333	aadA8b_1_AY139603	ant(3'')-Ia_1_X02340		aadA2_2_JQ364967	aadA2b_1_D43625						cml_1_M22614		ant(2'')-Ia_12_HQ880250	cmlA1_2_AB212941
SRR8901452		aph(3'')-Ib_5_AF321551		aph(6)-Id_2_AF024602	mdf(A)_1_Y08743	sul2_9_FJ197818		tet(A)_6_AF534183				sul1_11_DQ914960	aac(3)-VIa_2_NC_009838	aadA1_3_JQ414041	aadA24_1_DQ677333
SRR9913963					mdf(A)_1_Y08743			tet(A)_6_AF534183
SRR9914120		aph(3'')-Ib_5_AF321551		aph(6)-Id_2_AF024602	mdf(A)_1_Y08743	sul2_9_FJ197818		tet(A)_6_AF534183		floR_2_AF118107		sul1_11_DQ914960	aac(3)-VIa_2_NC_009838	aadA1_3_JQ414041	aadA24_1_DQ677333
ECL16273		aph(3'')-Ib_2_AF024602		aph(6)-Id_2_AF024602	mdf(A)_1_Y08743		tet(B)_2_AF326777					sul1_11_DQ914960		aadA1_4_JQ480156	aadA24_1_DQ677333	aadA8b_1_AY139603	ant(3'')-Ia_1_X02340										dfrA1_12_AY141977				aadA10_2_AM087405	aadA11_1_AY144590	dfrA14_4_AF393510
ECL17377		aph(3'')-Ib_2_AF024602		aph(6)-Id_2_AF024602	mdf(A)_1_Y08743		tet(B)_2_AF326777					sul1_11_DQ914960		aadA1_4_JQ480156	aadA24_1_DQ677333	aadA8b_1_AY139603	ant(3'')-Ia_1_X02340										dfrA1_12_AY141977				aadA10_2_AM087405	aadA11_1_AY144590	dfrA14_4_AF393510
ECL19602	aac(3)-IV_1_DQ241380	aph(3'')-Ib_2_AF024602		aph(6)-Id_2_AF024602	mdf(A)_1_Y08743	sul2_9_FJ197818		tet(A)_6_AF534183	dfrA12_10_FM877486			sul1_11_DQ914960		aadA1_4_JQ480156	aadA24_1_DQ677333	aadA8b_1_AY139603	ant(3'')-Ia_1_X02340		aadA2_2_JQ364967	aadA2b_1_D43625				tet(M)_5_U58985	tet(S/M)_1_HM367711		dfrA1_12_AY141977
ECL19820		aph(3'')-Ib_2_AF024602		aph(6)-Id_2_AF024602	mdf(A)_1_Y08743		tet(B)_2_AF326777					sul1_11_DQ914960		aadA1_4_JQ480156	aadA24_1_DQ677333	aadA8b_1_AY139603	ant(3'')-Ia_1_X02340										dfrA1_12_AY141977				aadA10_2_AM087405	aadA11_1_AY144590	dfrA14_4_AF393510
ECL19931					mdf(A)_1_Y08743							sul1_11_DQ914960		aadA1_4_JQ480156	aadA24_1_DQ677333	aadA8b_1_AY139603	ant(3'')-Ia_1_X02340		aadA2_1_NC_010870	aadA2b_1_D43625						cml_1_M22614	dfrA1_12_AY141977		cmlA1_2_AB212941		aadA10_2_AM087405	aadA11_1_AY144590	dfrA14_4_AF393510
ECL19990			aph(3')-Ia_1_V00359		mdf(A)_1_Y08743			tet(A)_6_AF534183				sul1_11_DQ914960		aadA1_3_JQ414041	aadA24_1_DQ677333	aadA8b_1_AY139603	ant(3'')-Ia_1_X02340		aadA2_1_NC_010870	aadA2b_1_D43625				tet(M)_5_U58985	tet(S/M)_1_HM367711	cml_1_M22614	dfrA1_12_AY141977		cmlA1_2_AB212941		aadA10_2_AM087405	aadA11_1_AY144590	dfrA14_4_AF393510
ECL20797		aph(3'')-Ib_2_AF024602		aph(6)-Id_2_AF024602	mdf(A)_1_Y08743	sul2_9_FJ197818		tet(A)_6_AF534183						aadA1_4_JQ480156	aadA24_1_DQ677333	aadA8b_1_AY139603	ant(3'')-Ia_1_X02340							tet(M)_5_U58985	tet(S/M)_1_HM367711		dfrA1_12_AY141977
ECL21756		aph(3'')-Ib_2_AF024602		aph(6)-Id_2_AF024602	mdf(A)_1_Y08743	sul2_9_FJ197818		tet(A)_6_AF534183						aadA1_4_JQ480156	aadA24_1_DQ677333	aadA8b_1_AY139603	ant(3'')-Ia_1_X02340							tet(M)_5_U58985	tet(S/M)_1_HM367711		dfrA1_12_AY141977
ECL22341		aph(3'')-Ib_2_AF024602		aph(6)-Id_2_AF024602	mdf(A)_1_Y08743	sul2_9_FJ197818		tet(A)_6_AF534183						aadA1_4_JQ480156	aadA24_1_DQ677333	aadA8b_1_AY139603	ant(3'')-Ia_1_X02340							tet(M)_5_U58985	tet(S/M)_1_HM367711		dfrA1_12_AY141977
ECL22529	aac(3)-IV_1_DQ241380	aph(3'')-Ib_5_AF321551	aph(3')-Ia_8_Y00452	aph(6)-Id_2_AF024602	mdf(A)_1_Y08743	sul2_9_FJ197818		tet(A)_6_AF534183		floR_2_AF118107				aadA1_4_JQ480156	aadA24_1_DQ677333	aadA8b_1_AY139603	ant(3'')-Ia_1_X02340										dfrA1_12_AY141977
ECL22653	aac(3)-IV_1_DQ241380	aph(3'')-Ib_5_AF321551	aph(3')-Ia_8_Y00452	aph(6)-Id_4_CP000971	mdf(A)_1_Y08743	sul2_9_FJ197818		tet(A)_6_AF534183		floR_2_AF118107				aadA1_4_JQ480156	aadA24_1_DQ677333	aadA8b_1_AY139603	ant(3'')-Ia_1_X02340							tet(M)_5_U58985	tet(S/M)_1_HM367711		dfrA1_12_AY141977
ECL21464					mdf(A)_1_Y08743			tet(A)_6_AF534183	dfrA12_10_FM877486					aadA1_3_JQ414041	aadA24_1_DQ677333	aadA8b_1_AY139603	ant(3'')-Ia_1_X02340		aadA2_1_NC_010870	aadA2b_1_D43625						cml_1_M22614			cmlA1_2_AB212941
ECL21732			aph(3')-Ia_1_V00359		mdf(A)_1_Y08743			tet(A)_6_AF534183	dfrA12_10_FM877486					aadA1_3_JQ414041	aadA24_1_DQ677333	aadA8b_1_AY139603	ant(3'')-Ia_1_X02340		aadA2_1_NC_010870	aadA2b_1_D43625						cml_1_M22614			cmlA1_2_AB212941
ECL22146	aac(3)-IV_1_DQ241380		aph(3')-Ia_9_EU722351		mdf(A)_1_Y08743	sul2_9_FJ197818		tet(A)_6_AF534183	dfrA12_10_FM877486					aadA1_3_JQ414041	aadA24_1_DQ677333	aadA8b_1_AY139603	ant(3'')-Ia_1_X02340		aadA2_1_NC_010870	aadA2b_1_D43625						cml_1_M22614			cmlA1_2_AB212941
ECL22172	aac(3)-IV_1_DQ241380		aph(3')-Ia_1_V00359		mdf(A)_1_Y08743			tet(A)_6_AF534183	dfrA12_10_FM877486					aadA1_3_JQ414041	aadA24_1_DQ677333	aadA8b_1_AY139603			aadA2_1_NC_010870	aadA2b_1_D43625						cml_1_M22614			cmlA1_2_AB212941								qnrB1_1_DQ351241	qnrB10_2_HM439644	qnrB13_1_EU273755	qnrB14_1_EU273757	qnrB15_1_EU302865	qnrB16_1_EU136183	qnrB17_2_AM919398	qnrB18_1_AM919399	qnrB20_1_AB379831	qnrB23_1_FJ981622	qnrB24_1_HM192542	qnrB26_1_HQ386846	qnrB29_1_HM439649
ECL22730					mdf(A)_1_Y08743			tet(A)_6_AF534183	dfrA12_10_FM877486					aadA1_4_JQ480156	aadA24_1_DQ677333	aadA8b_1_AY139603			aadA2_1_NC_010870	aadA2b_1_D43625						cml_1_M22614			cmlA1_2_AB212941
ECL22749					mdf(A)_1_Y08743	sul2_9_FJ197818		tet(A)_6_AF534183	dfrA12_10_FM877486					aadA1_3_JQ414041	aadA24_1_DQ677333	aadA8b_1_AY139603	ant(3'')-Ia_1_X02340		aadA2_1_NC_010870	aadA2b_1_D43625						cml_1_M22614			cmlA1_2_AB212941
ECL22882			aph(3')-Ia_1_V00359		mdf(A)_1_Y08743			tet(A)_6_AF534183	dfrA12_10_FM877486					aadA1_3_JQ414041	aadA24_1_DQ677333	aadA8b_1_AY139603	ant(3'')-Ia_1_X02340		aadA2_1_NC_010870	aadA2b_1_D43625						cml_1_M22614			cmlA1_2_AB212941
ECL00103					mdf(A)_1_Y08743		tet(B)_1_AP000342					sul1_11_DQ914960			aadA24_1_DQ677333		ant(3'')-Ia_1_X02340
ECL01302					mdf(A)_1_Y08743	sul2_9_FJ197818			dfrA12_10_FM877486		mph(A)_1_D16251	sul1_11_DQ914960		aadA1_2_FJ591054	aadA24_1_DQ677333	aadA8b_1_AY139603			aadA2_2_JQ364967	aadA2b_1_D43625
ECL01669					mdf(A)_1_Y08743		tet(B)_1_AP000342					sul1_11_DQ914960			aadA24_1_DQ677333		ant(3'')-Ia_1_X02340
ECL02602					mdf(A)_1_Y08743
ECL02964					mdf(A)_1_Y08743
ECL03391					mdf(A)_1_Y08743			tet(A)_6_AF534183				sul1_11_DQ914960		aadA1_3_JQ414041	aadA24_1_DQ677333	aadA8b_1_AY139603	ant(3'')-Ia_1_X02340
ECL04323					mdf(A)_1_Y08743
ECL04937					mdf(A)_1_Y08743		tet(B)_1_AP000342					sul1_11_DQ914960			aadA24_1_DQ677333		ant(3'')-Ia_1_X02340
ECL05543					mdf(A)_1_Y08743							sul1_11_DQ914960			aadA24_1_DQ677333		ant(3'')-Ia_1_X02340
ECL06007					mdf(A)_1_Y08743
ECL07310					mdf(A)_1_Y08743
ECL08786					mdf(A)_1_Y08743									aadA1_4_JQ480156	aadA24_1_DQ677333	aadA8b_1_AY139603	ant(3'')-Ia_1_X02340										dfrA1_12_AY141977
ECL05380		aph(3'')-Ib_2_AF024602	aph(3')-Ia_3_EF015636	aph(6)-Id_4_CP000971	mdf(A)_1_Y08743		tet(B)_1_AP000342					sul1_11_DQ914960			aadA24_1_DQ677333		ant(3'')-Ia_1_X02340
ECL05958		aph(3'')-Ib_2_AF024602	aph(3')-Ia_8_Y00452	aph(6)-Id_2_AF024602	mdf(A)_1_Y08743		tet(B)_1_AP000342					sul1_11_DQ914960		aadA1_3_JQ414041	aadA24_1_DQ677333	aadA8b_1_AY139603	ant(3'')-Ia_1_X02340										dfrA1_10_AF203818
ECL08334			aph(3')-Ia_1_V00359		mdf(A)_1_Y08743		tet(B)_2_AF326777					sul1_11_DQ914960		aadA1_2_FJ591054	aadA24_1_DQ677333	aadA8b_1_AY139603	ant(3'')-Ia_1_X02340		aadA2_1_NC_010870	aadA2b_1_D43625
ECL17896	aac(3)-IV_1_DQ241380	aph(3'')-Ib_2_AF024602	aph(3')-Ia_10_EU855787	aph(6)-Id_2_AF024602	mdf(A)_1_Y08743		tet(B)_2_AF326777		dfrA12_10_FM877486					aadA1_4_JQ480156	aadA24_1_DQ677333	aadA8b_1_AY139603	ant(3'')-Ia_1_X02340		aadA2_1_NC_010870	aadA2b_1_D43625
ECL19148					mdf(A)_1_Y08743		tet(B)_1_AP000342
ECL19153					mdf(A)_1_Y08743		tet(B)_1_AP000342
ECL19788					mdf(A)_1_Y08743		tet(B)_1_AP000342							aadA1_4_JQ480156	aadA24_1_DQ677333	aadA8b_1_AY139603	ant(3'')-Ia_1_X02340										dfrA1_12_AY141977
ECL20223					mdf(A)_1_Y08743	sul2_9_FJ197818	tet(B)_1_AP000342							aadA1_4_JQ480156	aadA24_1_DQ677333	aadA8b_1_AY139603			aadA2_2_JQ364967	aadA2b_1_D43625				tet(M)_5_U58985	tet(S/M)_1_HM367711		dfrA1_12_AY141977
ECL20462					mdf(A)_1_Y08743		tet(B)_1_AP000342
ECL22774					mdf(A)_1_Y08743		tet(B)_1_AP000342		dfrA12_10_FM877486					aadA1_3_JQ414041	aadA24_1_DQ677333	aadA8b_1_AY139603	ant(3'')-Ia_1_X02340		aadA2_1_NC_010870	aadA2b_1_D43625						cml_1_M22614			cmlA1_2_AB212941
ECL14672					mdf(A)_1_Y08743
ECL21170			aph(3')-Ia_1_V00359		mdf(A)_1_Y08743		tet(B)_2_AF326777							aadA1_3_JQ414041	aadA24_1_DQ677333	aadA8b_1_AY139603	ant(3'')-Ia_1_X02340									cml_1_M22614			cmlA1_2_AB212941
ECL01947					mdf(A)_1_Y08743		tet(B)_1_AP000342					sul1_11_DQ914960			aadA24_1_DQ677333		ant(3'')-Ia_1_X02340
ECL20395					mdf(A)_1_Y08743	sul2_9_FJ197818	tet(B)_2_AF326777																papA_F20:24:CP019944
ECL19146					mdf(A)_1_Y08743			tet(A)_6_AF534183
[truncated: 48 more columns]
