# Supplementary material for: High Risk Clone: A Proposal of Criteria Adapted to the One Health Context with Application to Enterotoxigenic Escherichia coli in the Pig Population
Source: Antibiotics (Basel). 2021 Feb 28;10(3):244. doi: 10.3390/antibiotics10030244 (PMC8000703; doi:10.3390/antibiotics10030244)
Supplement: Supplementary file 1 [file antibiotics-10-00244-s001.zip › TableS6_Argannotresults.xlsx]

## Sheet: argannot_total_2
ID_isolate	_AGly_aac_IVa	_AGly_aph_3____Ia	_AGly_aph_3___Ic	_AGly_aph3_Ia	_AGly_aph4_Ia	_AGly_strA	_AGly_strB	_Phe_catA1	_Sul_sul2	_Tet_tetB	_Sul_sul3	_Tet_tetA	_Tet_tetR	_MLS_mph_A_	_Phe_floR	_Sul_sul1	_Tmt_dfrA12	_AGly_aac3_VIa	_AGly_aadA1	_AGly_aadA1_pm	_AGly_aadA11	_AGly_aadA12	_AGly_aadA15	_AGly_aadA17	_AGly_aadA21	_AGly_aadA22	_AGly_aadA23	_AGly_aadA24	_AGly_aadA3	_AGly_aadA8	_AGly_aadA8b	_Tmt_dfrA15	_Tmt_dfrA15b	_AGly_aadA2	_AGly_aac3_IIa	_AGly_aac3_IIc	_AGly_aac3_IId	_AGly_aac3_IIe	_MLS_mph_B_	_MLS_mph_E_	_MLS_mph_F_	_MLS_msr_E_	_Tet_tetM	_Tmt_dfrA1	_AGly_aadB	_Phe_cmlA1	_Phe_cmlA10	_Phe_cmlA4	_Phe_cmlA5
ECL19159		(AGly)aph(3'')-Ia:FJ172370:38668-39483:816	(AGly)aph(3')-Ic:KP119857:914-1729:816	(AGly)aph3-Ia:HQ840942:23569-24384:816		(AGly)strA:AB366441:22458-23261:804	(AGly)strB:FJ474091:264-1100:837		(Sul)sul2:EU360945:1617-2432:816			(Tet)tetA:JX424423:94438-95712:1275	(Tet)tetR:HF545434:53576-54226:651		(Phe)floR:AKLJ01000508:383-1597:1215	(Sul)sul1:AF071413:6700-7539:840	(Tmt)dfrA12:Z21672:310-807:498				(AGly)aadA11:AJ567827:1-792:792	(AGly)aadA12:AY665771:1-792:792	(AGly)aadA15:DQ393783:1800-2591:792	(AGly)aadA17:FJ460181:774-1565:792	(AGly)aadA21:AY171244:47-838:792	(AGly)aadA22:AM261837:74-865:792	(AGly)aadA23:AJ809407:119-898:781		(AGly)aadA3:AF047479:1296-2087:792	(AGly)aadA8:AF326210:1-792:792	(AGly)aadA8b:AM040708:1174-1965:792			(AGly)aadA2:X68227:66-945:780
ECL19373											(Sul)sul3:HQ875016:7396-8187:792	(Tet)tetA:JX424423:94438-95712:1275	(Tet)tetR:HF545434:53576-54226:651	(MLS)mph(A):DQ445270:1626-2531:1230					(AGly)aadA1:M95287:3320-4111:792	(AGly)aadA1-pm:JQ690540:7968-8798:831	(AGly)aadA11:AJ567827:1-792:792	(AGly)aadA12:AY665771:1-792:792	(AGly)aadA15:DQ393783:1800-2591:792	(AGly)aadA17:FJ460181:774-1565:792	(AGly)aadA21:AY171244:47-838:792	(AGly)aadA22:AM261837:74-865:792	(AGly)aadA23:AJ809407:119-898:781	(AGly)aadA24:HQ123586:88-768:781	(AGly)aadA3:AF047479:1296-2087:792	(AGly)aadA8:AF326210:1-792:792	(AGly)aadA8b:AM040708:1174-1965:792			(AGly)aadA2:X68227:66-945:780									(Tet)tetM:DQ534550:1451-3370:1920			(Phe)cmlA1:M64556:601-1860:1260	(Phe)cmlA10:NG_047649:1-1260:1260	(Phe)cmlA4:NG_047652:101-1360:1260	(Phe)cmlA5:HQ141279:907-2166:1260
ECL19390												(Tet)tetA:JX424423:94438-95712:1275	(Tet)tetR:HF545434:53576-54226:651
ECL19414									(Sul)sul2:EU360945:1617-2432:816		(Sul)sul3:HQ875016:7396-8187:792	(Tet)tetA:JX424423:94438-95712:1275	(Tet)tetR:HF545434:53576-54226:651						(AGly)aadA1:M95287:3320-4111:792	(AGly)aadA1-pm:JQ690540:7968-8798:831	(AGly)aadA11:AJ567827:1-792:792	(AGly)aadA12:AY665771:1-792:792	(AGly)aadA15:DQ393783:1800-2591:792	(AGly)aadA17:FJ460181:774-1565:792	(AGly)aadA21:AY171244:47-838:792	(AGly)aadA22:AM261837:74-865:792	(AGly)aadA23:AJ809407:119-898:781	(AGly)aadA24:HQ123586:88-768:781	(AGly)aadA3:AF047479:1296-2087:792	(AGly)aadA8:AF326210:1-792:792	(AGly)aadA8b:AM040708:1174-1965:792			(AGly)aadA2:X68227:66-945:780												(Phe)cmlA1:M64556:601-1860:1260	(Phe)cmlA10:NG_047649:1-1260:1260	(Phe)cmlA4:NG_047652:101-1360:1260	(Phe)cmlA5:HQ141279:907-2166:1260
ECL19427									(Sul)sul2:EU360945:1617-2432:816		(Sul)sul3:HQ875016:7396-8187:792	(Tet)tetA:JX424423:94438-95712:1275	(Tet)tetR:HF545434:53576-54226:651						(AGly)aadA1:M95287:3320-4111:792	(AGly)aadA1-pm:JQ690540:7968-8798:831	(AGly)aadA11:AJ567827:1-792:792	(AGly)aadA12:AY665771:1-792:792	(AGly)aadA15:DQ393783:1800-2591:792	(AGly)aadA17:FJ460181:774-1565:792	(AGly)aadA21:AY171244:47-838:792	(AGly)aadA22:AM261837:74-865:792	(AGly)aadA23:AJ809407:119-898:781	(AGly)aadA24:HQ123586:88-768:781	(AGly)aadA3:AF047479:1296-2087:792	(AGly)aadA8:AF326210:1-792:792	(AGly)aadA8b:AM040708:1174-1965:792			(AGly)aadA2:X68227:66-945:780												(Phe)cmlA1:M64556:601-1860:1260	(Phe)cmlA10:NG_047649:1-1260:1260	(Phe)cmlA4:NG_047652:101-1360:1260	(Phe)cmlA5:HQ141279:907-2166:1260
ECL19555		(AGly)aph(3'')-Ia:FJ172370:38668-39483:816	(AGly)aph(3')-Ic:KP119857:914-1729:816	(AGly)aph3-Ia:HQ840942:23569-24384:816		(AGly)strA:AB366441:22458-23261:804	(AGly)strB:FJ474091:264-1100:837		(Sul)sul2:EU360945:1617-2432:816			(Tet)tetA:JX424423:94438-95712:1275	(Tet)tetR:HF545434:53576-54226:651
ECL19751	(AGly)aac-IVa:X01385:244-1029:786				(AGly)aph4-Ia:V01499:231-1256:1026				(Sul)sul2:EU360945:1617-2432:816			(Tet)tetA:JX424423:94438-95712:1275	(Tet)tetR:HF545434:53576-54226:651			(Sul)sul1:AF071413:6700-7539:840	(Tmt)dfrA12:Z21672:310-807:498				(AGly)aadA11:AJ567827:1-792:792	(AGly)aadA12:AY665771:1-792:792	(AGly)aadA15:DQ393783:1800-2591:792	(AGly)aadA17:FJ460181:774-1565:792	(AGly)aadA21:AY171244:47-838:792	(AGly)aadA22:AM261837:74-865:792	(AGly)aadA23:AJ809407:119-898:781	(AGly)aadA24:HQ123586:88-768:781	(AGly)aadA3:AF047479:1296-2087:792	(AGly)aadA8:AF326210:1-792:792	(AGly)aadA8b:AM040708:1174-1965:792			(AGly)aadA2:X68227:66-945:780									(Tet)tetM:DQ534550:1451-3370:1920
ECL19755	(AGly)aac-IVa:X01385:244-1029:786	(AGly)aph(3'')-Ia:FJ172370:38668-39483:816	(AGly)aph(3')-Ic:KP119857:914-1729:816	(AGly)aph3-Ia:HQ840942:23569-24384:816	(AGly)aph4-Ia:V01499:231-1256:1026						(Sul)sul3:HQ875016:7396-8187:792	(Tet)tetA:JX424423:94438-95712:1275	(Tet)tetR:HF545434:53576-54226:651				(Tmt)dfrA12:Z21672:310-807:498				(AGly)aadA11:AJ567827:1-792:792	(AGly)aadA12:AY665771:1-792:792	(AGly)aadA15:DQ393783:1800-2591:792	(AGly)aadA17:FJ460181:774-1565:792	(AGly)aadA21:AY171244:47-838:792	(AGly)aadA22:AM261837:74-865:792	(AGly)aadA23:AJ809407:119-898:781	(AGly)aadA24:HQ123586:88-768:781	(AGly)aadA3:AF047479:1296-2087:792	(AGly)aadA8:AF326210:1-792:792	(AGly)aadA8b:AM040708:1174-1965:792			(AGly)aadA2:X68227:66-945:780									(Tet)tetM:DQ534550:1451-3370:1920
ECL19763	(AGly)aac-IVa:X01385:244-1029:786											(Tet)tetA:JX424423:94438-95712:1275	(Tet)tetR:HF545434:53576-54226:651			(Sul)sul1:AF071413:6700-7539:840																													(AGly)aadB:JQ690540:4275-4808:534
ECL19885											(Sul)sul3:HQ875016:7396-8187:792	(Tet)tetA:JX424423:94438-95712:1275	(Tet)tetR:HF545434:53576-54226:651						(AGly)aadA1:M95287:3320-4111:792	(AGly)aadA1-pm:JQ690540:7968-8798:831	(AGly)aadA11:AJ567827:1-792:792	(AGly)aadA12:AY665771:1-792:792	(AGly)aadA15:DQ393783:1800-2591:792	(AGly)aadA17:FJ460181:774-1565:792	(AGly)aadA21:AY171244:47-838:792	(AGly)aadA22:AM261837:74-865:792	(AGly)aadA23:AJ809407:119-898:781	(AGly)aadA24:HQ123586:88-768:781	(AGly)aadA3:AF047479:1296-2087:792	(AGly)aadA8:AF326210:1-792:792	(AGly)aadA8b:AM040708:1174-1965:792			(AGly)aadA2:X68227:66-945:780												(Phe)cmlA1:M64556:601-1860:1260	(Phe)cmlA10:NG_047649:1-1260:1260	(Phe)cmlA4:NG_047652:101-1360:1260	(Phe)cmlA5:HQ141279:907-2166:1260
ECL20408		(AGly)aph(3'')-Ia:FJ172370:38668-39483:816	(AGly)aph(3')-Ic:KP119857:914-1729:816	(AGly)aph3-Ia:HQ840942:23569-24384:816		(AGly)strA:AB366441:22458-23261:804	(AGly)strB:FJ474091:264-1100:837		(Sul)sul2:EU360945:1617-2432:816			(Tet)tetA:JX424423:94438-95712:1275	(Tet)tetR:HF545434:53576-54226:651
ECL20721		(AGly)aph(3'')-Ia:FJ172370:38668-39483:816	(AGly)aph(3')-Ic:KP119857:914-1729:816	(AGly)aph3-Ia:HQ840942:23569-24384:816		(AGly)strA:AB366441:22458-23261:804	(AGly)strB:FJ474091:264-1100:837		(Sul)sul2:EU360945:1617-2432:816			(Tet)tetA:JX424423:94438-95712:1275	(Tet)tetR:HF545434:53576-54226:651
ECL20906						(AGly)strA:AB366441:22458-23261:804	(AGly)strB:FJ474091:264-1100:837		(Sul)sul2:EU360945:1617-2432:816			(Tet)tetA:JX424423:94438-95712:1275	(Tet)tetR:HF545434:53576-54226:651
ECL21415								(Phe)catA1:V00622:244-903:660								(Sul)sul1:AF071413:6700-7539:840
ECL21975		(AGly)aph(3'')-Ia:FJ172370:38668-39483:816	(AGly)aph(3')-Ic:KP119857:914-1729:816	(AGly)aph3-Ia:HQ840942:23569-24384:816		(AGly)strA:AB366441:22458-23261:804	(AGly)strB:FJ474091:264-1100:837		(Sul)sul2:EU360945:1617-2432:816			(Tet)tetA:JX424423:94438-95712:1275	(Tet)tetR:HF545434:53576-54226:651
ECL19664												(Tet)tetA:JX424423:94438-95712:1275	(Tet)tetR:HF545434:53576-54226:651
ECL19668												(Tet)tetA:JX424423:94438-95712:1275	(Tet)tetR:HF545434:53576-54226:651
ECL19916
ECL20013
ECL20014												(Tet)tetA:JX424423:94438-95712:1275
ECL20015												(Tet)tetA:JX424423:94438-95712:1275	(Tet)tetR:HF545434:53576-54226:651
ECL20018												(Tet)tetA:JX424423:94438-95712:1275	(Tet)tetR:HF545434:53576-54226:651
ECL20209												(Tet)tetA:JX424423:94438-95712:1275	(Tet)tetR:HF545434:53576-54226:651
ECL20212												(Tet)tetA:JX424423:94438-95712:1275	(Tet)tetR:HF545434:53576-54226:651
ECL20239									(Sul)sul2:EU360945:1617-2432:816			(Tet)tetA:JX424423:94438-95712:1275	(Tet)tetR:HF545434:53576-54226:651
ECL20256									(Sul)sul2:EU360945:1617-2432:816			(Tet)tetA:JX424423:94438-95712:1275	(Tet)tetR:HF545434:53576-54226:651
ECL20278												(Tet)tetA:JX424423:94438-95712:1275	(Tet)tetR:HF545434:53576-54226:651
ECL20290												(Tet)tetA:JX424423:94438-95712:1275	(Tet)tetR:HF545434:53576-54226:651
ECL20389												(Tet)tetA:JX424423:94438-95712:1275	(Tet)tetR:HF545434:53576-54226:651
ECL20404												(Tet)tetA:JX424423:94438-95712:1275	(Tet)tetR:HF545434:53576-54226:651
ECL20435		(AGly)aph(3'')-Ia:FJ172370:38668-39483:816	(AGly)aph(3')-Ic:KP119857:914-1729:816	(AGly)aph3-Ia:HQ840942:23569-24384:816								(Tet)tetA:JX424423:94438-95712:1275	(Tet)tetR:HF545434:53576-54226:651			(Sul)sul1:AF071413:6700-7539:840	(Tmt)dfrA12:Z21672:310-807:498				(AGly)aadA11:AJ567827:1-792:792	(AGly)aadA12:AY665771:1-792:792	(AGly)aadA15:DQ393783:1800-2591:792	(AGly)aadA17:FJ460181:774-1565:792	(AGly)aadA21:AY171244:47-838:792	(AGly)aadA22:AM261837:74-865:792	(AGly)aadA23:AJ809407:119-898:781		(AGly)aadA3:AF047479:1296-2087:792	(AGly)aadA8:AF326210:1-792:792	(AGly)aadA8b:AM040708:1174-1965:792			(AGly)aadA2:X68227:66-945:780
ECL20436		(AGly)aph(3'')-Ia:FJ172370:38668-39483:816	(AGly)aph(3')-Ic:KP119857:914-1729:816	(AGly)aph3-Ia:HQ840942:23569-24384:816								(Tet)tetA:JX424423:94438-95712:1275	(Tet)tetR:HF545434:53576-54226:651			(Sul)sul1:AF071413:6700-7539:840	(Tmt)dfrA12:Z21672:310-807:498				(AGly)aadA11:AJ567827:1-792:792	(AGly)aadA12:AY665771:1-792:792	(AGly)aadA15:DQ393783:1800-2591:792	(AGly)aadA17:FJ460181:774-1565:792	(AGly)aadA21:AY171244:47-838:792	(AGly)aadA22:AM261837:74-865:792	(AGly)aadA23:AJ809407:119-898:781		(AGly)aadA3:AF047479:1296-2087:792	(AGly)aadA8:AF326210:1-792:792	(AGly)aadA8b:AM040708:1174-1965:792			(AGly)aadA2:X68227:66-945:780
ECL20544						(AGly)strA:AB366441:22458-23261:804	(AGly)strB:FJ474091:264-1100:837		(Sul)sul2:EU360945:1617-2432:816			(Tet)tetA:JX424423:94438-95712:1275	(Tet)tetR:HF545434:53576-54226:651
ECL20566												(Tet)tetA:JX424423:94438-95712:1275	(Tet)tetR:HF545434:53576-54226:651			(Sul)sul1:AF071413:6700-7539:840																													(AGly)aadB:JQ690540:4275-4808:534
ECL20622												(Tet)tetA:JX424423:94438-95712:1275	(Tet)tetR:HF545434:53576-54226:651
ECL20725	(AGly)aac-IVa:X01385:244-1029:786				(AGly)aph4-Ia:V01499:231-1256:1026	(AGly)strA:AB366441:22458-23261:804	(AGly)strB:FJ474091:264-1100:837		(Sul)sul2:EU360945:1617-2432:816		(Sul)sul3:HQ875016:7396-8187:792	(Tet)tetA:JX424423:94438-95712:1275	(Tet)tetR:HF545434:53576-54226:651						(AGly)aadA1:M95287:3320-4111:792	(AGly)aadA1-pm:JQ690540:7968-8798:831	(AGly)aadA11:AJ567827:1-792:792	(AGly)aadA12:AY665771:1-792:792	(AGly)aadA15:DQ393783:1800-2591:792	(AGly)aadA17:FJ460181:774-1565:792	(AGly)aadA21:AY171244:47-838:792	(AGly)aadA22:AM261837:74-865:792	(AGly)aadA23:AJ809407:119-898:781	(AGly)aadA24:HQ123586:88-768:781	(AGly)aadA3:AF047479:1296-2087:792	(AGly)aadA8:AF326210:1-792:792	(AGly)aadA8b:AM040708:1174-1965:792			(AGly)aadA2:X68227:66-945:780												(Phe)cmlA1:M64556:601-1860:1260	(Phe)cmlA10:NG_047649:1-1260:1260	(Phe)cmlA4:NG_047652:101-1360:1260	(Phe)cmlA5:HQ141279:907-2166:1260
ECL20769												(Tet)tetA:JX424423:94438-95712:1275	(Tet)tetR:HF545434:53576-54226:651																														(Tet)tetM:DQ534550:1451-3370:1920
ECL20776		(AGly)aph(3'')-Ia:FJ172370:38668-39483:816	(AGly)aph(3')-Ic:KP119857:914-1729:816	(AGly)aph3-Ia:HQ840942:23569-24384:816								(Tet)tetA:JX424423:94438-95712:1275	(Tet)tetR:HF545434:53576-54226:651			(Sul)sul1:AF071413:6700-7539:840	(Tmt)dfrA12:Z21672:310-807:498				(AGly)aadA11:AJ567827:1-792:792	(AGly)aadA12:AY665771:1-792:792	(AGly)aadA15:DQ393783:1800-2591:792	(AGly)aadA17:FJ460181:774-1565:792	(AGly)aadA21:AY171244:47-838:792	(AGly)aadA22:AM261837:74-865:792	(AGly)aadA23:AJ809407:119-898:781		(AGly)aadA3:AF047479:1296-2087:792	(AGly)aadA8:AF326210:1-792:792	(AGly)aadA8b:AM040708:1174-1965:792			(AGly)aadA2:X68227:66-945:780
ECL20778	(AGly)aac-IVa:X01385:244-1029:786					(AGly)strA:AB366441:22458-23261:804	(AGly)strB:FJ474091:264-1100:837		(Sul)sul2:EU360945:1617-2432:816			(Tet)tetA:JX424423:94438-95712:1275	(Tet)tetR:HF545434:53576-54226:651	(MLS)mph(A):DQ445270:1626-2531:1230		(Sul)sul1:AF071413:6700-7539:840	(Tmt)dfrA12:Z21672:310-807:498				(AGly)aadA11:AJ567827:1-792:792	(AGly)aadA12:AY665771:1-792:792	(AGly)aadA15:DQ393783:1800-2591:792	(AGly)aadA17:FJ460181:774-1565:792	(AGly)aadA21:AY171244:47-838:792	(AGly)aadA22:AM261837:74-865:792	(AGly)aadA23:AJ809407:119-898:781		(AGly)aadA3:AF047479:1296-2087:792	(AGly)aadA8:AF326210:1-792:792	(AGly)aadA8b:AM040708:1174-1965:792			(AGly)aadA2:X68227:66-945:780
ECL20814												(Tet)tetA:JX424423:94438-95712:1275	(Tet)tetR:HF545434:53576-54226:651
ECL20836											(Sul)sul3:HQ875016:7396-8187:792						(Tmt)dfrA12:Z21672:310-807:498		(AGly)aadA1:M95287:3320-4111:792	(AGly)aadA1-pm:JQ690540:7968-8798:831	(AGly)aadA11:AJ567827:1-792:792	(AGly)aadA12:AY665771:1-792:792	(AGly)aadA15:DQ393783:1800-2591:792	(AGly)aadA17:FJ460181:774-1565:792	(AGly)aadA21:AY171244:47-838:792	(AGly)aadA22:AM261837:74-865:792	(AGly)aadA23:AJ809407:119-898:781	(AGly)aadA24:HQ123586:88-768:781	(AGly)aadA3:AF047479:1296-2087:792	(AGly)aadA8:AF326210:1-792:792	(AGly)aadA8b:AM040708:1174-1965:792			(AGly)aadA2:X68227:66-945:780												(Phe)cmlA1:M64556:601-1860:1260	(Phe)cmlA10:NG_047649:1-1260:1260	(Phe)cmlA4:NG_047652:101-1360:1260	(Phe)cmlA5:HQ141279:907-2166:1260
ECL20846												(Tet)tetA:JX424423:94438-95712:1275
ECL20850	(AGly)aac-IVa:X01385:244-1029:786											(Tet)tetA:JX424423:94438-95712:1275	(Tet)tetR:HF545434:53576-54226:651
ECL20887												(Tet)tetA:JX424423:94438-95712:1275	(Tet)tetR:HF545434:53576-54226:651
ECL20911									(Sul)sul2:EU360945:1617-2432:816			(Tet)tetA:JX424423:94438-95712:1275	(Tet)tetR:HF545434:53576-54226:651
ECL20918	(AGly)aac-IVa:X01385:244-1029:786				(AGly)aph4-Ia:V01499:231-1256:1026						(Sul)sul3:HQ875016:7396-8187:792	(Tet)tetA:JX424423:94438-95712:1275	(Tet)tetR:HF545434:53576-54226:651						(AGly)aadA1:M95287:3320-4111:792	(AGly)aadA1-pm:JQ690540:7968-8798:831	(AGly)aadA11:AJ567827:1-792:792	(AGly)aadA12:AY665771:1-792:792	(AGly)aadA15:DQ393783:1800-2591:792	(AGly)aadA17:FJ460181:774-1565:792	(AGly)aadA21:AY171244:47-838:792	(AGly)aadA22:AM261837:74-865:792	(AGly)aadA23:AJ809407:119-898:781	(AGly)aadA24:HQ123586:88-768:781	(AGly)aadA3:AF047479:1296-2087:792	(AGly)aadA8:AF326210:1-792:792	(AGly)aadA8b:AM040708:1174-1965:792			(AGly)aadA2:X68227:66-945:780												(Phe)cmlA1:M64556:601-1860:1260	(Phe)cmlA10:NG_047649:1-1260:1260	(Phe)cmlA4:NG_047652:101-1360:1260	(Phe)cmlA5:HQ141279:907-2166:1260
ECL20924												(Tet)tetA:JX424423:94438-95712:1275	(Tet)tetR:HF545434:53576-54226:651
ECL21259									(Sul)sul2:EU360945:1617-2432:816			(Tet)tetA:JX424423:94438-95712:1275	(Tet)tetR:HF545434:53576-54226:651
ECL21274									(Sul)sul2:EU360945:1617-2432:816			(Tet)tetA:JX424423:94438-95712:1275	(Tet)tetR:HF545434:53576-54226:651
ECL21290												(Tet)tetA:JX424423:94438-95712:1275	(Tet)tetR:HF545434:53576-54226:651
ECL21405		(AGly)aph(3'')-Ia:FJ172370:38668-39483:816	(AGly)aph(3')-Ic:KP119857:914-1729:816	(AGly)aph3-Ia:HQ840942:23569-24384:816		(AGly)strA:AB366441:22458-23261:804	(AGly)strB:FJ474091:264-1100:837	(Phe)catA1:V00622:244-903:660	(Sul)sul2:EU360945:1617-2432:816			(Tet)tetA:JX424423:94438-95712:1275	(Tet)tetR:HF545434:53576-54226:651		(Phe)floR:AKLJ01000508:383-1597:1215	(Sul)sul1:AF071413:6700-7539:840	(Tmt)dfrA12:Z21672:310-807:498				(AGly)aadA11:AJ567827:1-792:792	(AGly)aadA12:AY665771:1-792:792	(AGly)aadA15:DQ393783:1800-2591:792	(AGly)aadA17:FJ460181:774-1565:792	(AGly)aadA21:AY171244:47-838:792	(AGly)aadA22:AM261837:74-865:792	(AGly)aadA23:AJ809407:119-898:781		(AGly)aadA3:AF047479:1296-2087:792	(AGly)aadA8:AF326210:1-792:792	(AGly)aadA8b:AM040708:1174-1965:792			(AGly)aadA2:X68227:66-945:780
ECL21412	(AGly)aac-IVa:X01385:244-1029:786				(AGly)aph4-Ia:V01499:231-1256:1026	(AGly)strA:AB366441:22458-23261:804	(AGly)strB:FJ474091:264-1100:837		(Sul)sul2:EU360945:1617-2432:816		(Sul)sul3:HQ875016:7396-8187:792	(Tet)tetA:JX424423:94438-95712:1275	(Tet)tetR:HF545434:53576-54226:651		(Phe)floR:AKLJ01000508:383-1597:1215	(Sul)sul1:AF071413:6700-7539:840	(Tmt)dfrA12:Z21672:310-807:498				(AGly)aadA11:AJ567827:1-792:792	(AGly)aadA12:AY665771:1-792:792	(AGly)aadA15:DQ393783:1800-2591:792	(AGly)aadA17:FJ460181:774-1565:792	(AGly)aadA21:AY171244:47-838:792	(AGly)aadA22:AM261837:74-865:792	(AGly)aadA23:AJ809407:119-898:781		(AGly)aadA3:AF047479:1296-2087:792	(AGly)aadA8:AF326210:1-792:792	(AGly)aadA8b:AM040708:1174-1965:792			(AGly)aadA2:X68227:66-945:780
ECL21483						(AGly)strA:AB366441:22458-23261:804	(AGly)strB:FJ474091:264-1100:837		(Sul)sul2:EU360945:1617-2432:816						(Phe)floR:AKLJ01000508:383-1597:1215	(Sul)sul1:AF071413:6700-7539:840																												(Tmt)dfrA1:JQ794607:474:59-532
ECL21505	(AGly)aac-IVa:X01385:244-1029:786								(Sul)sul2:EU360945:1617-2432:816			(Tet)tetA:JX424423:94438-95712:1275	(Tet)tetR:HF545434:53576-54226:651
ECL21512	(AGly)aac-IVa:X01385:244-1029:786				(AGly)aph4-Ia:V01499:231-1256:1026						(Sul)sul3:HQ875016:7396-8187:792	(Tet)tetA:JX424423:94438-95712:1275	(Tet)tetR:HF545434:53576-54226:651						(AGly)aadA1:M95287:3320-4111:792	(AGly)aadA1-pm:JQ690540:7968-8798:831	(AGly)aadA11:AJ567827:1-792:792	(AGly)aadA12:AY665771:1-792:792	(AGly)aadA15:DQ393783:1800-2591:792	(AGly)aadA17:FJ460181:774-1565:792	(AGly)aadA21:AY171244:47-838:792	(AGly)aadA22:AM261837:74-865:792	(AGly)aadA23:AJ809407:119-898:781	(AGly)aadA24:HQ123586:88-768:781	(AGly)aadA3:AF047479:1296-2087:792	(AGly)aadA8:AF326210:1-792:792	(AGly)aadA8b:AM040708:1174-1965:792			(AGly)aadA2:X68227:66-945:780												(Phe)cmlA1:M64556:601-1860:1260	(Phe)cmlA10:NG_047649:1-1260:1260	(Phe)cmlA4:NG_047652:101-1360:1260	(Phe)cmlA5:HQ141279:907-2166:1260
ECL21541	(AGly)aac-IVa:X01385:244-1029:786				(AGly)aph4-Ia:V01499:231-1256:1026	(AGly)strA:AB366441:22458-23261:804	(AGly)strB:FJ474091:264-1100:837		(Sul)sul2:EU360945:1617-2432:816		(Sul)sul3:HQ875016:7396-8187:792	(Tet)tetA:JX424423:94438-95712:1275	(Tet)tetR:HF545434:53576-54226:651		(Phe)floR:AKLJ01000508:383-1597:1215	(Sul)sul1:AF071413:6700-7539:840	(Tmt)dfrA12:Z21672:310-807:498				(AGly)aadA11:AJ567827:1-792:792	(AGly)aadA12:AY665771:1-792:792	(AGly)aadA15:DQ393783:1800-2591:792	(AGly)aadA17:FJ460181:774-1565:792	(AGly)aadA21:AY171244:47-838:792	(AGly)aadA22:AM261837:74-865:792	(AGly)aadA23:AJ809407:119-898:781		(AGly)aadA3:AF047479:1296-2087:792	(AGly)aadA8:AF326210:1-792:792	(AGly)aadA8b:AM040708:1174-1965:792			(AGly)aadA2:X68227:66-945:780
ECL21542		(AGly)aph(3'')-Ia:FJ172370:38668-39483:816	(AGly)aph(3')-Ic:KP119857:914-1729:816	(AGly)aph3-Ia:HQ840942:23569-24384:816								(Tet)tetA:JX424423:94438-95712:1275	(Tet)tetR:HF545434:53576-54226:651			(Sul)sul1:AF071413:6700-7539:840	(Tmt)dfrA12:Z21672:310-807:498				(AGly)aadA11:AJ567827:1-792:792	(AGly)aadA12:AY665771:1-792:792	(AGly)aadA15:DQ393783:1800-2591:792	(AGly)aadA17:FJ460181:774-1565:792	(AGly)aadA21:AY171244:47-838:792	(AGly)aadA22:AM261837:74-865:792	(AGly)aadA23:AJ809407:119-898:781		(AGly)aadA3:AF047479:1296-2087:792	(AGly)aadA8:AF326210:1-792:792	(AGly)aadA8b:AM040708:1174-1965:792			(AGly)aadA2:X68227:66-945:780
ECL21551												(Tet)tetA:JX424423:94438-95712:1275	(Tet)tetR:HF545434:53576-54226:651																																(AGly)aadB:JQ690540:4275-4808:534
ECL21628		(AGly)aph(3'')-Ia:FJ172370:38668-39483:816	(AGly)aph(3')-Ic:KP119857:914-1729:816	(AGly)aph3-Ia:HQ840942:23569-24384:816							(Sul)sul3:HQ875016:7396-8187:792	(Tet)tetA:JX424423:94438-95712:1275	(Tet)tetR:HF545434:53576-54226:651	(MLS)mph(A):DQ445270:1626-2531:1230					(AGly)aadA1:M95287:3320-4111:792	(AGly)aadA1-pm:JQ690540:7968-8798:831	(AGly)aadA11:AJ567827:1-792:792	(AGly)aadA12:AY665771:1-792:792	(AGly)aadA15:DQ393783:1800-2591:792	(AGly)aadA17:FJ460181:774-1565:792	(AGly)aadA21:AY171244:47-838:792	(AGly)aadA22:AM261837:74-865:792	(AGly)aadA23:AJ809407:119-898:781	(AGly)aadA24:HQ123586:88-768:781	(AGly)aadA3:AF047479:1296-2087:792	(AGly)aadA8:AF326210:1-792:792	(AGly)aadA8b:AM040708:1174-1965:792			(AGly)aadA2:X68227:66-945:780	(AGly)aac3-IIa:X51534:91-951:861	(AGly)aac3-IIc:X54723:819-1679:861	(AGly)aac3-IId:EU022314:1-861:861	(AGly)aac3-IIe:EU022315:1-861:861					(Tet)tetM:DQ534550:1451-3370:1920			(Phe)cmlA1:M64556:601-1860:1260	(Phe)cmlA10:NG_047649:1-1260:1260	(Phe)cmlA4:NG_047652:101-1360:1260	(Phe)cmlA5:HQ141279:907-2166:1260
ECL21652		(AGly)aph(3'')-Ia:FJ172370:38668-39483:816	(AGly)aph(3')-Ic:KP119857:914-1729:816	(AGly)aph3-Ia:HQ840942:23569-24384:816								(Tet)tetA:JX424423:94438-95712:1275	(Tet)tetR:HF545434:53576-54226:651			(Sul)sul1:AF071413:6700-7539:840	(Tmt)dfrA12:Z21672:310-807:498				(AGly)aadA11:AJ567827:1-792:792	(AGly)aadA12:AY665771:1-792:792	(AGly)aadA15:DQ393783:1800-2591:792	(AGly)aadA17:FJ460181:774-1565:792	(AGly)aadA21:AY171244:47-838:792	(AGly)aadA22:AM261837:74-865:792	(AGly)aadA23:AJ809407:119-898:781		(AGly)aadA3:AF047479:1296-2087:792	(AGly)aadA8:AF326210:1-792:792	(AGly)aadA8b:AM040708:1174-1965:792			(AGly)aadA2:X68227:66-945:780
ECL21655		(AGly)aph(3'')-Ia:FJ172370:38668-39483:816	(AGly)aph(3')-Ic:KP119857:914-1729:816	(AGly)aph3-Ia:HQ840942:23569-24384:816		(AGly)strA:AB366441:22458-23261:804	(AGly)strB:FJ474091:264-1100:837		(Sul)sul2:EU360945:1617-2432:816			(Tet)tetA:JX424423:94438-95712:1275	(Tet)tetR:HF545434:53576-54226:651		(Phe)floR:AKLJ01000508:383-1597:1215																													(Tmt)dfrA1:JQ794607:474:59-532	(AGly)aadB:JQ690540:4275-4808:534	(Phe)cmlA1:M64556:601-1860:1260	(Phe)cmlA10:NG_047649:1-1260:1260	(Phe)cmlA4:NG_047652:101-1360:1260	(Phe)cmlA5:HQ141279:907-2166:1260
ECL21657		(AGly)aph(3'')-Ia:FJ172370:38668-39483:816	(AGly)aph(3')-Ic:KP119857:914-1729:816	(AGly)aph3-Ia:HQ840942:23569-24384:816								(Tet)tetA:JX424423:94438-95712:1275	(Tet)tetR:HF545434:53576-54226:651			(Sul)sul1:AF071413:6700-7539:840	(Tmt)dfrA12:Z21672:310-807:498				(AGly)aadA11:AJ567827:1-792:792	(AGly)aadA12:AY665771:1-792:792	(AGly)aadA15:DQ393783:1800-2591:792	(AGly)aadA17:FJ460181:774-1565:792	(AGly)aadA21:AY171244:47-838:792	(AGly)aadA22:AM261837:74-865:792	(AGly)aadA23:AJ809407:119-898:781		(AGly)aadA3:AF047479:1296-2087:792	(AGly)aadA8:AF326210:1-792:792	(AGly)aadA8b:AM040708:1174-1965:792			(AGly)aadA2:X68227:66-945:780
ECL21676		(AGly)aph(3'')-Ia:FJ172370:38668-39483:816	(AGly)aph(3')-Ic:KP119857:914-1729:816	(AGly)aph3-Ia:HQ840942:23569-24384:816								(Tet)tetA:JX424423:94438-95712:1275	(Tet)tetR:HF545434:53576-54226:651			(Sul)sul1:AF071413:6700-7539:840	(Tmt)dfrA12:Z21672:310-807:498				(AGly)aadA11:AJ567827:1-792:792	(AGly)aadA12:AY665771:1-792:792	(AGly)aadA15:DQ393783:1800-2591:792	(AGly)aadA17:FJ460181:774-1565:792	(AGly)aadA21:AY171244:47-838:792	(AGly)aadA22:AM261837:74-865:792	(AGly)aadA23:AJ809407:119-898:781		(AGly)aadA3:AF047479:1296-2087:792	(AGly)aadA8:AF326210:1-792:792	(AGly)aadA8b:AM040708:1174-1965:792			(AGly)aadA2:X68227:66-945:780
ECL21680												(Tet)tetA:JX424423:94438-95712:1275	(Tet)tetR:HF545434:53576-54226:651
ECL21730												(Tet)tetA:JX424423:94438-95712:1275	(Tet)tetR:HF545434:53576-54226:651
ECL21837												(Tet)tetA:JX424423:94438-95712:1275	(Tet)tetR:HF545434:53576-54226:651
ECL21979	(AGly)aac-IVa:X01385:244-1029:786				(AGly)aph4-Ia:V01499:231-1256:1026	(AGly)strA:AB366441:22458-23261:804	(AGly)strB:FJ474091:264-1100:837		(Sul)sul2:EU360945:1617-2432:816			(Tet)tetA:JX424423:94438-95712:1275	(Tet)tetR:HF545434:53576-54226:651		(Phe)floR:AKLJ01000508:383-1597:1215	(Sul)sul1:AF071413:6700-7539:840	(Tmt)dfrA12:Z21672:310-807:498				(AGly)aadA11:AJ567827:1-792:792	(AGly)aadA12:AY665771:1-792:792	(AGly)aadA15:DQ393783:1800-2591:792	(AGly)aadA17:FJ460181:774-1565:792	(AGly)aadA21:AY171244:47-838:792	(AGly)aadA22:AM261837:74-865:792	(AGly)aadA23:AJ809407:119-898:781		(AGly)aadA3:AF047479:1296-2087:792	(AGly)aadA8:AF326210:1-792:792	(AGly)aadA8b:AM040708:1174-1965:792			(AGly)aadA2:X68227:66-945:780
ECL22052		(AGly)aph(3'')-Ia:FJ172370:38668-39483:816	(AGly)aph(3')-Ic:KP119857:914-1729:816	(AGly)aph3-Ia:HQ840942:23569-24384:816			(AGly)strB:FJ474091:264-1100:837					(Tet)tetA:JX424423:94438-95712:1275	(Tet)tetR:HF545434:53576-54226:651						(AGly)aadA1:M95287:3320-4111:792	(AGly)aadA1-pm:JQ690540:7968-8798:831	(AGly)aadA11:AJ567827:1-792:792	(AGly)aadA12:AY665771:1-792:792	(AGly)aadA15:DQ393783:1800-2591:792	(AGly)aadA17:FJ460181:774-1565:792	(AGly)aadA21:AY171244:47-838:792	(AGly)aadA22:AM261837:74-865:792	(AGly)aadA23:AJ809407:119-898:781	(AGly)aadA24:HQ123586:88-768:781	(AGly)aadA3:AF047479:1296-2087:792	(AGly)aadA8:AF326210:1-792:792	(AGly)aadA8b:AM040708:1174-1965:792												(Tet)tetM:DQ534550:1451-3370:1920
ECL22093	(AGly)aac-IVa:X01385:244-1029:786	(AGly)aph(3'')-Ia:FJ172370:38668-39483:816	(AGly)aph(3')-Ic:KP119857:914-1729:816	(AGly)aph3-Ia:HQ840942:23569-24384:816	(AGly)aph4-Ia:V01499:231-1256:1026							(Tet)tetA:JX424423:94438-95712:1275	(Tet)tetR:HF545434:53576-54226:651																														(Tet)tetM:DQ534550:1451-3370:1920
ECL22099
ECL22128									(Sul)sul2:EU360945:1617-2432:816			(Tet)tetA:JX424423:94438-95712:1275	(Tet)tetR:HF545434:53576-54226:651																														(Tet)tetM:DQ534550:1451-3370:1920	(Tmt)dfrA1:JQ794607:474:59-532
ECL22215	(AGly)aac-IVa:X01385:244-1029:786				(AGly)aph4-Ia:V01499:231-1256:1026	(AGly)strA:AB366441:22458-23261:804	(AGly)strB:FJ474091:264-1100:837			(Tet)tetB:AB089594:1-1206:1206	(Sul)sul3:HQ875016:7396-8187:792	(Tet)tetA:JX424423:94438-95712:1275	(Tet)tetR:HF545434:53576-54226:651						(AGly)aadA1:M95287:3320-4111:792	(AGly)aadA1-pm:JQ690540:7968-8798:831	(AGly)aadA11:AJ567827:1-792:792	(AGly)aadA12:AY665771:1-792:792	(AGly)aadA15:DQ393783:1800-2591:792	(AGly)aadA17:FJ460181:774-1565:792	(AGly)aadA21:AY171244:47-838:792	(AGly)aadA22:AM261837:74-865:792	(AGly)aadA23:AJ809407:119-898:781	(AGly)aadA24:HQ123586:88-768:781	(AGly)aadA3:AF047479:1296-2087:792	(AGly)aadA8:AF326210:1-792:792	(AGly)aadA8b:AM040708:1174-1965:792			(AGly)aadA2:X68227:66-945:780												(Phe)cmlA1:M64556:601-1860:1260	(Phe)cmlA10:NG_047649:1-1260:1260	(Phe)cmlA4:NG_047652:101-1360:1260	(Phe)cmlA5:HQ141279:907-2166:1260
ECL22265	(AGly)aac-IVa:X01385:244-1029:786				(AGly)aph4-Ia:V01499:231-1256:1026	(AGly)strA:AB366441:22458-23261:804	(AGly)strB:FJ474091:264-1100:837			(Tet)tetB:AB089594:1-1206:1206	(Sul)sul3:HQ875016:7396-8187:792								(AGly)aadA1:M95287:3320-4111:792	(AGly)aadA1-pm:JQ690540:7968-8798:831	(AGly)aadA11:AJ567827:1-792:792	(AGly)aadA12:AY665771:1-792:792	(AGly)aadA15:DQ393783:1800-2591:792	(AGly)aadA17:FJ460181:774-1565:792	(AGly)aadA21:AY171244:47-838:792	(AGly)aadA22:AM261837:74-865:792	(AGly)aadA23:AJ809407:119-898:781	(AGly)aadA24:HQ123586:88-768:781	(AGly)aadA3:AF047479:1296-2087:792	(AGly)aadA8:AF326210:1-792:792	(AGly)aadA8b:AM040708:1174-1965:792			(AGly)aadA2:X68227:66-945:780												(Phe)cmlA1:M64556:601-1860:1260	(Phe)cmlA10:NG_047649:1-1260:1260	(Phe)cmlA4:NG_047652:101-1360:1260	(Phe)cmlA5:HQ141279:907-2166:1260
ECL22274												(Tet)tetA:JX424423:94438-95712:1275	(Tet)tetR:HF545434:53576-54226:651
ECL22293												(Tet)tetA:JX424423:94438-95712:1275	(Tet)tetR:HF545434:53576-54226:651
ECL22298												(Tet)tetA:JX424423:94438-95712:1275	(Tet)tetR:HF545434:53576-54226:651
ECL22433	(AGly)aac-IVa:X01385:244-1029:786				(AGly)aph4-Ia:V01499:231-1256:1026	(AGly)strA:AB366441:22458-23261:804	(AGly)strB:FJ474091:264-1100:837			(Tet)tetB:AB089594:1-1206:1206
ECL22438	(AGly)aac-IVa:X01385:244-1029:786				(AGly)aph4-Ia:V01499:231-1256:1026	(AGly)strA:AB366441:22458-23261:804	(AGly)strB:FJ474091:264-1100:837		(Sul)sul2:EU360945:1617-2432:816		(Sul)sul3:HQ875016:7396-8187:792	(Tet)tetA:JX424423:94438-95712:1275	(Tet)tetR:HF545434:53576-54226:651		(Phe)floR:AKLJ01000508:383-1597:1215	(Sul)sul1:AF071413:6700-7539:840	(Tmt)dfrA12:Z21672:310-807:498				(AGly)aadA11:AJ567827:1-792:792	(AGly)aadA12:AY665771:1-792:792	(AGly)aadA15:DQ393783:1800-2591:792	(AGly)aadA17:FJ460181:774-1565:792	(AGly)aadA21:AY171244:47-838:792	(AGly)aadA22:AM261837:74-865:792	(AGly)aadA23:AJ809407:119-898:781		(AGly)aadA3:AF047479:1296-2087:792	(AGly)aadA8:AF326210:1-792:792	(AGly)aadA8b:AM040708:1174-1965:792			(AGly)aadA2:X68227:66-945:780
ECL22447	(AGly)aac-IVa:X01385:244-1029:786				(AGly)aph4-Ia:V01499:231-1256:1026				(Sul)sul2:EU360945:1617-2432:816			(Tet)tetA:JX424423:94438-95712:1275	(Tet)tetR:HF545434:53576-54226:651																														(Tet)tetM:DQ534550:1451-3370:1920
ECL22491	(AGly)aac-IVa:X01385:244-1029:786				(AGly)aph4-Ia:V01499:231-1256:1026							(Tet)tetA:JX424423:94438-95712:1275	(Tet)tetR:HF545434:53576-54226:651						(AGly)aadA1:M95287:3320-4111:792	(AGly)aadA1-pm:JQ690540:7968-8798:831	(AGly)aadA11:AJ567827:1-792:792	(AGly)aadA12:AY665771:1-792:792	(AGly)aadA15:DQ393783:1800-2591:792	(AGly)aadA17:FJ460181:774-1565:792	(AGly)aadA21:AY171244:47-838:792	(AGly)aadA22:AM261837:74-865:792	(AGly)aadA23:AJ809407:119-898:781	(AGly)aadA24:HQ123586:88-768:781	(AGly)aadA3:AF047479:1296-2087:792	(AGly)aadA8:AF326210:1-792:792	(AGly)aadA8b:AM040708:1174-1965:792			(AGly)aadA2:X68227:66-945:780												(Phe)cmlA1:M64556:601-1860:1260	(Phe)cmlA10:NG_047649:1-1260:1260	(Phe)cmlA4:NG_047652:101-1360:1260	(Phe)cmlA5:HQ141279:907-2166:1260
ECL22503												(Tet)tetA:JX424423:94438-95712:1275	(Tet)tetR:HF545434:53576-54226:651
ECL22505												(Tet)tetA:JX424423:94438-95712:1275	(Tet)tetR:HF545434:53576-54226:651
ECL22553
ECL22800
ECL22887												(Tet)tetA:JX424423:94438-95712:1275	(Tet)tetR:HF545434:53576-54226:651																														(Tet)tetM:DQ534550:1451-3370:1920
ECL22967	(AGly)aac-IVa:X01385:244-1029:786				(AGly)aph4-Ia:V01499:231-1256:1026	(AGly)strA:AB366441:22458-23261:804	(AGly)strB:FJ474091:264-1100:837		(Sul)sul2:EU360945:1617-2432:816			(Tet)tetA:JX424423:94438-95712:1275	(Tet)tetR:HF545434:53576-54226:651		(Phe)floR:AKLJ01000508:383-1597:1215	(Sul)sul1:AF071413:6700-7539:840	(Tmt)dfrA12:Z21672:310-807:498				(AGly)aadA11:AJ567827:1-792:792	(AGly)aadA12:AY665771:1-792:792	(AGly)aadA15:DQ393783:1800-2591:792	(AGly)aadA17:FJ460181:774-1565:792	(AGly)aadA21:AY171244:47-838:792	(AGly)aadA22:AM261837:74-865:792	(AGly)aadA23:AJ809407:119-898:781		(AGly)aadA3:AF047479:1296-2087:792	(AGly)aadA8:AF326210:1-792:792	(AGly)aadA8b:AM040708:1174-1965:792			(AGly)aadA2:X68227:66-945:780
ECL23013		(AGly)aph(3'')-Ia:FJ172370:38668-39483:816	(AGly)aph(3')-Ic:KP119857:914-1729:816	(AGly)aph3-Ia:HQ840942:23569-24384:816		(AGly)strA:AB366441:22458-23261:804	(AGly)strB:FJ474091:264-1100:837		(Sul)sul2:EU360945:1617-2432:816			(Tet)tetA:JX424423:94438-95712:1275	(Tet)tetR:HF545434:53576-54226:651	(MLS)mph(A):DQ445270:1626-2531:1230	(Phe)floR:AKLJ01000508:383-1597:1215	(Sul)sul1:AF071413:6700-7539:840	(Tmt)dfrA12:Z21672:310-807:498				(AGly)aadA11:AJ567827:1-792:792	(AGly)aadA12:AY665771:1-792:792	(AGly)aadA15:DQ393783:1800-2591:792	(AGly)aadA17:FJ460181:774-1565:792	(AGly)aadA21:AY171244:47-838:792	(AGly)aadA22:AM261837:74-865:792	(AGly)aadA23:AJ809407:119-898:781		(AGly)aadA3:AF047479:1296-2087:792	(AGly)aadA8:AF326210:1-792:792	(AGly)aadA8b:AM040708:1174-1965:792			(AGly)aadA2:X68227:66-945:780	(AGly)aac3-IIa:X51534:91-951:861	(AGly)aac3-IIc:X54723:819-1679:861	(AGly)aac3-IId:EU022314:1-861:861	(AGly)aac3-IIe:EU022315:1-861:861
ECL23067
ECL07805								(Phe)catA1:V00622:244-903:660				(Tet)tetA:JX424423:94438-95712:1275	(Tet)tetR:HF545434:53576-54226:651			(Sul)sul1:AF071413:6700-7539:840			(AGly)aadA1:M95287:3320-4111:792	(AGly)aadA1-pm:JQ690540:7968-8798:831	(AGly)aadA11:AJ567827:1-792:792	(AGly)aadA12:AY665771:1-792:792	(AGly)aadA15:DQ393783:1800-2591:792	(AGly)aadA17:FJ460181:774-1565:792	(AGly)aadA21:AY171244:47-838:792	(AGly)aadA22:AM261837:74-865:792	(AGly)aadA23:AJ809407:119-898:781	(AGly)aadA24:HQ123586:88-768:781	(AGly)aadA3:AF047479:1296-2087:792	(AGly)aadA8:AF326210:1-792:792	(AGly)aadA8b:AM040708:1174-1965:792
ECL09114						(AGly)strA:AB366441:22458-23261:804	(AGly)strB:FJ474091:264-1100:837		(Sul)sul2:EU360945:1617-2432:816			(Tet)tetA:JX424423:94438-95712:1275	(Tet)tetR:HF545434:53576-54226:651
ECL10170								(Phe)catA1:V00622:244-903:660	(Sul)sul2:EU360945:1617-2432:816			(Tet)tetA:JX424423:94438-95712:1275	(Tet)tetR:HF545434:53576-54226:651			(Sul)sul1:AF071413:6700-7539:840			(AGly)aadA1:M95287:3320-4111:792	(AGly)aadA1-pm:JQ690540:7968-8798:831	(AGly)aadA11:AJ567827:1-792:792	(AGly)aadA12:AY665771:1-792:792	(AGly)aadA15:DQ393783:1800-2591:792	(AGly)aadA17:FJ460181:774-1565:792	(AGly)aadA21:AY171244:47-838:792	(AGly)aadA22:AM261837:74-865:792	(AGly)aadA23:AJ809407:119-898:781	(AGly)aadA24:HQ123586:88-768:781	(AGly)aadA3:AF047479:1296-2087:792	(AGly)aadA8:AF326210:1-792:792	(AGly)aadA8b:AM040708:1174-1965:792			(AGly)aadA2:X68227:66-945:780										(Tmt)dfrA1:JQ794607:474:59-532
ECL11324								(Phe)catA1:V00622:244-903:660				(Tet)tetA:JX424423:94438-95712:1275	(Tet)tetR:HF545434:53576-54226:651			(Sul)sul1:AF071413:6700-7539:840			(AGly)aadA1:M95287:3320-4111:792	(AGly)aadA1-pm:JQ690540:7968-8798:831	(AGly)aadA11:AJ567827:1-792:792	(AGly)aadA12:AY665771:1-792:792	(AGly)aadA15:DQ393783:1800-2591:792	(AGly)aadA17:FJ460181:774-1565:792	(AGly)aadA21:AY171244:47-838:792	(AGly)aadA22:AM261837:74-865:792	(AGly)aadA23:AJ809407:119-898:781	(AGly)aadA24:HQ123586:88-768:781	(AGly)aadA3:AF047479:1296-2087:792	(AGly)aadA8:AF326210:1-792:792	(AGly)aadA8b:AM040708:1174-1965:792
ECL13086	(AGly)aac-IVa:X01385:244-1029:786	(AGly)aph(3'')-Ia:FJ172370:38668-39483:816	(AGly)aph(3')-Ic:KP119857:914-1729:816	(AGly)aph3-Ia:HQ840942:23569-24384:816	(AGly)aph4-Ia:V01499:231-1256:1026	(AGly)strA:AB366441:22458-23261:804	(AGly)strB:FJ474091:264-1100:837		(Sul)sul2:EU360945:1617-2432:816			(Tet)tetA:JX424423:94438-95712:1275	(Tet)tetR:HF545434:53576-54226:651		(Phe)floR:AKLJ01000508:383-1597:1215			(AGly)aac3-VIa:M88012:193-1092:900	(AGly)aadA1:M95287:3320-4111:792	(AGly)aadA1-pm:JQ690540:7968-8798:831	(AGly)aadA11:AJ567827:1-792:792	(AGly)aadA12:AY665771:1-792:792	(AGly)aadA15:DQ393783:1800-2591:792	(AGly)aadA17:FJ460181:774-1565:792	(AGly)aadA21:AY171244:47-838:792	(AGly)aadA22:AM261837:74-865:792	(AGly)aadA23:AJ809407:119-898:781	(AGly)aadA24:HQ123586:88-768:781	(AGly)aadA3:AF047479:1296-2087:792	(AGly)aadA8:AF326210:1-792:792	(AGly)aadA8b:AM040708:1174-1965:792													(Tmt)dfrA1:JQ794607:474:59-532	(AGly)aadB:JQ690540:4275-4808:534	(Phe)cmlA1:M64556:601-1860:1260	(Phe)cmlA10:NG_047649:1-1260:1260	(Phe)cmlA4:NG_047652:101-1360:1260	(Phe)cmlA5:HQ141279:907-2166:1260
ECL13345	(AGly)aac-IVa:X01385:244-1029:786				(AGly)aph4-Ia:V01499:231-1256:1026	(AGly)strA:AB366441:22458-23261:804	(AGly)strB:FJ474091:264-1100:837					(Tet)tetA:JX424423:94438-95712:1275	(Tet)tetR:HF545434:53576-54226:651
ECL18172												(Tet)tetA:JX424423:94438-95712:1275	(Tet)tetR:HF545434:53576-54226:651
ECL18728											(Sul)sul3:HQ875016:7396-8187:792	(Tet)tetA:JX424423:94438-95712:1275	(Tet)tetR:HF545434:53576-54226:651						(AGly)aadA1:M95287:3320-4111:792	(AGly)aadA1-pm:JQ690540:7968-8798:831	(AGly)aadA11:AJ567827:1-792:792	(AGly)aadA12:AY665771:1-792:792	(AGly)aadA15:DQ393783:1800-2591:792	(AGly)aadA17:FJ460181:774-1565:792	(AGly)aadA21:AY171244:47-838:792	(AGly)aadA22:AM261837:74-865:792	(AGly)aadA23:AJ809407:119-898:781	(AGly)aadA24:HQ123586:88-768:781	(AGly)aadA3:AF047479:1296-2087:792	(AGly)aadA8:AF326210:1-792:792	(AGly)aadA8b:AM040708:1174-1965:792			(AGly)aadA2:X68227:66-945:780												(Phe)cmlA1:M64556:601-1860:1260	(Phe)cmlA10:NG_047649:1-1260:1260	(Phe)cmlA4:NG_047652:101-1360:1260	(Phe)cmlA5:HQ141279:907-2166:1260
ECL19517
ECL22741		(AGly)aph(3'')-Ia:FJ172370:38668-39483:816	(AGly)aph(3')-Ic:KP119857:914-1729:816	(AGly)aph3-Ia:HQ840942:23569-24384:816
ECL85531		(AGly)aph(3'')-Ia:FJ172370:38668-39483:816	(AGly)aph(3')-Ic:KP119857:914-1729:816	(AGly)aph3-Ia:HQ840942:23569-24384:816		(AGly)strA:AB366441:22458-23261:804	(AGly)strB:FJ474091:264-1100:837		(Sul)sul2:EU360945:1617-2432:816			(Tet)tetA:JX424423:94438-95712:1275	(Tet)tetR:HF545434:53576-54226:651	(MLS)mph(A):DQ445270:1626-2531:1230		(Sul)sul1:AF071413:6700-7539:840	(Tmt)dfrA12:Z21672:310-807:498		(AGly)aadA1:M95287:3320-4111:792	(AGly)aadA1-pm:JQ690540:7968-8798:831	(AGly)aadA11:AJ567827:1-792:792	(AGly)aadA12:AY665771:1-792:792	(AGly)aadA15:DQ393783:1800-2591:792	(AGly)aadA17:FJ460181:774-1565:792	(AGly)aadA21:AY171244:47-838:792	(AGly)aadA22:AM261837:74-865:792	(AGly)aadA23:AJ809407:119-898:781	(AGly)aadA24:HQ123586:88-768:781	(AGly)aadA3:AF047479:1296-2087:792	(AGly)aadA8:AF326210:1-792:792	(AGly)aadA8b:AM040708:1174-1965:792			(AGly)aadA2:X68227:66-945:780												(Phe)cmlA1:M64556:601-1860:1260	(Phe)cmlA10:NG_047649:1-1260:1260	(Phe)cmlA4:NG_047652:101-1360:1260	(Phe)cmlA5:HQ141279:907-2166:1260
ECL00351																(Sul)sul1:AF071413:6700-7539:840
ECL00652		(AGly)aph(3'')-Ia:FJ172370:38668-39483:816	(AGly)aph(3')-Ic:KP119857:914-1729:816	(AGly)aph3-Ia:HQ840942:23569-24384:816		(AGly)strA:AB366441:22458-23261:804	(AGly)strB:FJ474091:264-1100:837		(Sul)sul2:EU360945:1617-2432:816			(Tet)tetA:JX424423:94438-95712:1275	(Tet)tetR:HF545434:53576-54226:651			(Sul)sul1:AF071413:6700-7539:840
ECL09646								(Phe)catA1:V00622:244-903:660				(Tet)tetA:JX424423:94438-95712:1275	(Tet)tetR:HF545434:53576-54226:651			(Sul)sul1:AF071413:6700-7539:840
ECL10647						(AGly)strA:AB366441:22458-23261:804	(AGly)strB:FJ474091:264-1100:837		(Sul)sul2:EU360945:1617-2432:816	(Tet)tetB:AB089594:1-1206:1206						(Sul)sul1:AF071413:6700-7539:840																											(Tet)tetM:DQ534550:1451-3370:1920
ECL11171						(AGly)strA:AB366441:22458-23261:804	(AGly)strB:FJ474091:264-1100:837		(Sul)sul2:EU360945:1617-2432:816			(Tet)tetA:JX424423:94438-95712:1275	(Tet)tetR:HF545434:53576-54226:651	(MLS)mph(A):DQ445270:1626-2531:1230		(Sul)sul1:AF071413:6700-7539:840	(Tmt)dfrA12:Z21672:310-807:498				(AGly)aadA11:AJ567827:1-792:792	(AGly)aadA12:AY665771:1-792:792	(AGly)aadA15:DQ393783:1800-2591:792	(AGly)aadA17:FJ460181:774-1565:792	(AGly)aadA21:AY171244:47-838:792	(AGly)aadA22:AM261837:74-865:792	(AGly)aadA23:AJ809407:119-898:781		(AGly)aadA3:AF047479:1296-2087:792	(AGly)aadA8:AF326210:1-792:792	(AGly)aadA8b:AM040708:1174-1965:792			(AGly)aadA2:X68227:66-945:780	(AGly)aac3-IIa:X51534:91-951:861	(AGly)aac3-IIc:X54723:819-1679:861	(AGly)aac3-IId:EU022314:1-861:861	(AGly)aac3-IIe:EU022315:1-861:861
ECL14048						(AGly)strA:AB366441:22458-23261:804	(AGly)strB:FJ474091:264-1100:837		(Sul)sul2:EU360945:1617-2432:816			(Tet)tetA:JX424423:94438-95712:1275	(Tet)tetR:HF545434:53576-54226:651			(Sul)sul1:AF071413:6700-7539:840
ECL18573						(AGly)strA:AB366441:22458-23261:804	(AGly)strB:FJ474091:264-1100:837		(Sul)sul2:EU360945:1617-2432:816			(Tet)tetA:JX424423:94438-95712:1275	(Tet)tetR:HF545434:53576-54226:651			(Sul)sul1:AF071413:6700-7539:840
ECL19125							(AGly)strB:FJ474091:264-1100:837				(Sul)sul3:HQ875016:7396-8187:792
ECL19187						(AGly)strA:AB366441:22458-23261:804	(AGly)strB:FJ474091:264-1100:837		(Sul)sul2:EU360945:1617-2432:816			(Tet)tetA:JX424423:94438-95712:1275	(Tet)tetR:HF545434:53576-54226:651			(Sul)sul1:AF071413:6700-7539:840
ECL19345												(Tet)tetA:JX424423:94438-95712:1275	(Tet)tetR:HF545434:53576-54226:651			(Sul)sul1:AF071413:6700-7539:840		(AGly)aac3-VIa:M88012:193-1092:900	(AGly)aadA1:M95287:3320-4111:792	(AGly)aadA1-pm:JQ690540:7968-8798:831	(AGly)aadA11:AJ567827:1-792:792	(AGly)aadA12:AY665771:1-792:792	(AGly)aadA15:DQ393783:1800-2591:792	(AGly)aadA17:FJ460181:774-1565:792	(AGly)aadA21:AY171244:47-838:792	(AGly)aadA22:AM261837:74-865:792	(AGly)aadA23:AJ809407:119-898:781	(AGly)aadA24:HQ123586:88-768:781	(AGly)aadA3:AF047479:1296-2087:792	(AGly)aadA8:AF326210:1-792:792	(AGly)aadA8b:AM040708:1174-1965:792
ECL19403						(AGly)strA:AB366441:22458-23261:804	(AGly)strB:FJ474091:264-1100:837		(Sul)sul2:EU360945:1617-2432:816			(Tet)tetA:JX424423:94438-95712:1275	(Tet)tetR:HF545434:53576-54226:651		(Phe)floR:AKLJ01000508:383-1597:1215	(Sul)sul1:AF071413:6700-7539:840			(AGly)aadA1:M95287:3320-4111:792	(AGly)aadA1-pm:JQ690540:7968-8798:831	(AGly)aadA11:AJ567827:1-792:792	(AGly)aadA12:AY665771:1-792:792	(AGly)aadA15:DQ393783:1800-2591:792	(AGly)aadA17:FJ460181:774-1565:792	(AGly)aadA21:AY171244:47-838:792	(AGly)aadA22:AM261837:74-865:792	(AGly)aadA23:AJ809407:119-898:781	(AGly)aadA24:HQ123586:88-768:781	(AGly)aadA3:AF047479:1296-2087:792	(AGly)aadA8:AF326210:1-792:792	(AGly)aadA8b:AM040708:1174-1965:792
ECL19889		(AGly)aph(3'')-Ia:FJ172370:38668-39483:816	(AGly)aph(3')-Ic:KP119857:914-1729:816	(AGly)aph3-Ia:HQ840942:23569-24384:816		(AGly)strA:AB366441:22458-23261:804	(AGly)strB:FJ474091:264-1100:837		(Sul)sul2:EU360945:1617-2432:816			(Tet)tetA:JX424423:94438-95712:1275	(Tet)tetR:HF545434:53576-54226:651		(Phe)floR:AKLJ01000508:383-1597:1215	(Sul)sul1:AF071413:6700-7539:840			(AGly)aadA1:M95287:3320-4111:792	(AGly)aadA1-pm:JQ690540:7968-8798:831	(AGly)aadA11:AJ567827:1-792:792	(AGly)aadA12:AY665771:1-792:792	(AGly)aadA15:DQ393783:1800-2591:792	(AGly)aadA17:FJ460181:774-1565:792	(AGly)aadA21:AY171244:47-838:792	(AGly)aadA22:AM261837:74-865:792	(AGly)aadA23:AJ809407:119-898:781	(AGly)aadA24:HQ123586:88-768:781	(AGly)aadA3:AF047479:1296-2087:792	(AGly)aadA8:AF326210:1-792:792	(AGly)aadA8b:AM040708:1174-1965:792												(Tet)tetM:DQ534550:1451-3370:1920
ECL19901											(Sul)sul3:HQ875016:7396-8187:792						(Tmt)dfrA12:Z21672:310-807:498		(AGly)aadA1:M95287:3320-4111:792	(AGly)aadA1-pm:JQ690540:7968-8798:831	(AGly)aadA11:AJ567827:1-792:792	(AGly)aadA12:AY665771:1-792:792	(AGly)aadA15:DQ393783:1800-2591:792	(AGly)aadA17:FJ460181:774-1565:792	(AGly)aadA21:AY171244:47-838:792	(AGly)aadA22:AM261837:74-865:792	(AGly)aadA23:AJ809407:119-898:781	(AGly)aadA24:HQ123586:88-768:781	(AGly)aadA3:AF047479:1296-2087:792	(AGly)aadA8:AF326210:1-792:792	(AGly)aadA8b:AM040708:1174-1965:792			(AGly)aadA2:X68227:66-945:780												(Phe)cmlA1:M64556:601-1860:1260	(Phe)cmlA10:NG_047649:1-1260:1260	(Phe)cmlA4:NG_047652:101-1360:1260	(Phe)cmlA5:HQ141279:907-2166:1260
ECL19902											(Sul)sul3:HQ875016:7396-8187:792	(Tet)tetA:JX424423:94438-95712:1275	(Tet)tetR:HF545434:53576-54226:651				(Tmt)dfrA12:Z21672:310-807:498		(AGly)aadA1:M95287:3320-4111:792	(AGly)aadA1-pm:JQ690540:7968-8798:831	(AGly)aadA11:AJ567827:1-792:792	(AGly)aadA12:AY665771:1-792:792	(AGly)aadA15:DQ393783:1800-2591:792	(AGly)aadA17:FJ460181:774-1565:792	(AGly)aadA21:AY171244:47-838:792	(AGly)aadA22:AM261837:74-865:792	(AGly)aadA23:AJ809407:119-898:781	(AGly)aadA24:HQ123586:88-768:781	(AGly)aadA3:AF047479:1296-2087:792	(AGly)aadA8:AF326210:1-792:792	(AGly)aadA8b:AM040708:1174-1965:792			(AGly)aadA2:X68227:66-945:780									(Tet)tetM:DQ534550:1451-3370:1920			(Phe)cmlA1:M64556:601-1860:1260	(Phe)cmlA10:NG_047649:1-1260:1260	(Phe)cmlA4:NG_047652:101-1360:1260	(Phe)cmlA5:HQ141279:907-2166:1260
ECL19508						(AGly)strA:AB366441:22458-23261:804	(AGly)strB:FJ474091:264-1100:837		(Sul)sul2:EU360945:1617-2432:816	(Tet)tetB:AB089594:1-1206:1206		(Tet)tetA:JX424423:94438-95712:1275	(Tet)tetR:HF545434:53576-54226:651						(AGly)aadA1:M95287:3320-4111:792	(AGly)aadA1-pm:JQ690540:7968-8798:831	(AGly)aadA11:AJ567827:1-792:792	(AGly)aadA12:AY665771:1-792:792	(AGly)aadA15:DQ393783:1800-2591:792	(AGly)aadA17:FJ460181:774-1565:792	(AGly)aadA21:AY171244:47-838:792	(AGly)aadA22:AM261837:74-865:792	(AGly)aadA23:AJ809407:119-898:781	(AGly)aadA24:HQ123586:88-768:781	(AGly)aadA3:AF047479:1296-2087:792	(AGly)aadA8:AF326210:1-792:792	(AGly)aadA8b:AM040708:1174-1965:792
ECL19641									(Sul)sul2:EU360945:1617-2432:816	(Tet)tetB:AB089594:1-1206:1206									(AGly)aadA1:M95287:3320-4111:792	(AGly)aadA1-pm:JQ690540:7968-8798:831	(AGly)aadA11:AJ567827:1-792:792	(AGly)aadA12:AY665771:1-792:792	(AGly)aadA15:DQ393783:1800-2591:792	(AGly)aadA17:FJ460181:774-1565:792	(AGly)aadA21:AY171244:47-838:792	(AGly)aadA22:AM261837:74-865:792	(AGly)aadA23:AJ809407:119-898:781	(AGly)aadA24:HQ123586:88-768:781	(AGly)aadA3:AF047479:1296-2087:792	(AGly)aadA8:AF326210:1-792:792	(AGly)aadA8b:AM040708:1174-1965:792
ECL19894									(Sul)sul2:EU360945:1617-2432:816	(Tet)tetB:AB089594:1-1206:1206									(AGly)aadA1:M95287:3320-4111:792	(AGly)aadA1-pm:JQ690540:7968-8798:831	(AGly)aadA11:AJ567827:1-792:792	(AGly)aadA12:AY665771:1-792:792	(AGly)aadA15:DQ393783:1800-2591:792	(AGly)aadA17:FJ460181:774-1565:792	(AGly)aadA21:AY171244:47-838:792	(AGly)aadA22:AM261837:74-865:792	(AGly)aadA23:AJ809407:119-898:781	(AGly)aadA24:HQ123586:88-768:781	(AGly)aadA3:AF047479:1296-2087:792	(AGly)aadA8:AF326210:1-792:792	(AGly)aadA8b:AM040708:1174-1965:792
ECL19939									(Sul)sul2:EU360945:1617-2432:816	(Tet)tetB:AB089594:1-1206:1206									(AGly)aadA1:M95287:3320-4111:792	(AGly)aadA1-pm:JQ690540:7968-8798:831	(AGly)aadA11:AJ567827:1-792:792	(AGly)aadA12:AY665771:1-792:792	(AGly)aadA15:DQ393783:1800-2591:792	(AGly)aadA17:FJ460181:774-1565:792	(AGly)aadA21:AY171244:47-838:792	(AGly)aadA22:AM261837:74-865:792	(AGly)aadA23:AJ809407:119-898:781	(AGly)aadA24:HQ123586:88-768:781	(AGly)aadA3:AF047479:1296-2087:792	(AGly)aadA8:AF326210:1-792:792	(AGly)aadA8b:AM040708:1174-1965:792
ECL20308		(AGly)aph(3'')-Ia:FJ172370:38668-39483:816	(AGly)aph(3')-Ic:KP119857:914-1729:816	(AGly)aph3-Ia:HQ840942:23569-24384:816		(AGly)strA:AB366441:22458-23261:804	(AGly)strB:FJ474091:264-1100:837		(Sul)sul2:EU360945:1617-2432:816	(Tet)tetB:AB089594:1-1206:1206		(Tet)tetA:JX424423:94438-95712:1275	(Tet)tetR:HF545434:53576-54226:651						(AGly)aadA1:M95287:3320-4111:792	(AGly)aadA1-pm:JQ690540:7968-8798:831	(AGly)aadA11:AJ567827:1-792:792	(AGly)aadA12:AY665771:1-792:792	(AGly)aadA15:DQ393783:1800-2591:792	(AGly)aadA17:FJ460181:774-1565:792	(AGly)aadA21:AY171244:47-838:792	(AGly)aadA22:AM261837:74-865:792	(AGly)aadA23:AJ809407:119-898:781	(AGly)aadA24:HQ123586:88-768:781	(AGly)aadA3:AF047479:1296-2087:792	(AGly)aadA8:AF326210:1-792:792	(AGly)aadA8b:AM040708:1174-1965:792
ECL20550									(Sul)sul2:EU360945:1617-2432:816	(Tet)tetB:AB089594:1-1206:1206						(Sul)sul1:AF071413:6700-7539:840			(AGly)aadA1:M95287:3320-4111:792	(AGly)aadA1-pm:JQ690540:7968-8798:831	(AGly)aadA11:AJ567827:1-792:792	(AGly)aadA12:AY665771:1-792:792	(AGly)aadA15:DQ393783:1800-2591:792	(AGly)aadA17:FJ460181:774-1565:792	(AGly)aadA21:AY171244:47-838:792	(AGly)aadA22:AM261837:74-865:792	(AGly)aadA23:AJ809407:119-898:781	(AGly)aadA24:HQ123586:88-768:781	(AGly)aadA3:AF047479:1296-2087:792	(AGly)aadA8:AF326210:1-792:792	(AGly)aadA8b:AM040708:1174-1965:792														(AGly)aadB:JQ690540:4275-4808:534
ECL21584		(AGly)aph(3'')-Ia:FJ172370:38668-39483:816	(AGly)aph(3')-Ic:KP119857:914-1729:816	(AGly)aph3-Ia:HQ840942:23569-24384:816		(AGly)strA:AB366441:22458-23261:804	(AGly)strB:FJ474091:264-1100:837		(Sul)sul2:EU360945:1617-2432:816	(Tet)tetB:AB089594:1-1206:1206					(Phe)floR:AKLJ01000508:383-1597:1215				(AGly)aadA1:M95287:3320-4111:792	(AGly)aadA1-pm:JQ690540:7968-8798:831	(AGly)aadA11:AJ567827:1-792:792	(AGly)aadA12:AY665771:1-792:792	(AGly)aadA15:DQ393783:1800-2591:792	(AGly)aadA17:FJ460181:774-1565:792	(AGly)aadA21:AY171244:47-838:792	(AGly)aadA22:AM261837:74-865:792	(AGly)aadA23:AJ809407:119-898:781	(AGly)aadA24:HQ123586:88-768:781	(AGly)aadA3:AF047479:1296-2087:792	(AGly)aadA8:AF326210:1-792:792	(AGly)aadA8b:AM040708:1174-1965:792
ECL22487	(AGly)aac-IVa:X01385:244-1029:786				(AGly)aph4-Ia:V01499:231-1256:1026				(Sul)sul2:EU360945:1617-2432:816	(Tet)tetB:AB089594:1-1206:1206									(AGly)aadA1:M95287:3320-4111:792	(AGly)aadA1-pm:JQ690540:7968-8798:831	(AGly)aadA11:AJ567827:1-792:792	(AGly)aadA12:AY665771:1-792:792	(AGly)aadA15:DQ393783:1800-2591:792	(AGly)aadA17:FJ460181:774-1565:792	(AGly)aadA21:AY171244:47-838:792	(AGly)aadA22:AM261837:74-865:792	(AGly)aadA23:AJ809407:119-898:781	(AGly)aadA24:HQ123586:88-768:781	(AGly)aadA3:AF047479:1296-2087:792	(AGly)aadA8:AF326210:1-792:792	(AGly)aadA8b:AM040708:1174-1965:792												(Tet)tetM:DQ534550:1451-3370:1920
ECL20627												(Tet)tetA:JX424423:94438-95712:1275	(Tet)tetR:HF545434:53576-54226:651
ECL20896	(AGly)aac-IVa:X01385:244-1029:786				(AGly)aph4-Ia:V01499:231-1256:1026						(Sul)sul3:HQ875016:7396-8187:792	(Tet)tetA:JX424423:94438-95712:1275	(Tet)tetR:HF545434:53576-54226:651						(AGly)aadA1:M95287:3320-4111:792	(AGly)aadA1-pm:JQ690540:7968-8798:831	(AGly)aadA11:AJ567827:1-792:792	(AGly)aadA12:AY665771:1-792:792	(AGly)aadA15:DQ393783:1800-2591:792	(AGly)aadA17:FJ460181:774-1565:792	(AGly)aadA21:AY171244:47-838:792	(AGly)aadA22:AM261837:74-865:792	(AGly)aadA23:AJ809407:119-898:781	(AGly)aadA24:HQ123586:88-768:781	(AGly)aadA3:AF047479:1296-2087:792	(AGly)aadA8:AF326210:1-792:792	(AGly)aadA8b:AM040708:1174-1965:792			(AGly)aadA2:X68227:66-945:780												(Phe)cmlA1:M64556:601-1860:1260	(Phe)cmlA10:NG_047649:1-1260:1260	(Phe)cmlA4:NG_047652:101-1360:1260	(Phe)cmlA5:HQ141279:907-2166:1260
ECL21518												(Tet)tetA:JX424423:94438-95712:1275	(Tet)tetR:HF545434:53576-54226:651
ECL22134												(Tet)tetA:JX424423:94438-95712:1275	(Tet)tetR:HF545434:53576-54226:651
ECL22536		(AGly)aph(3'')-Ia:FJ172370:38668-39483:816	(AGly)aph(3')-Ic:KP119857:914-1729:816	(AGly)aph3-Ia:HQ840942:23569-24384:816								(Tet)tetA:JX424423:94438-95712:1275	(Tet)tetR:HF545434:53576-54226:651
ECL22867												(Tet)tetA:JX424423:94438-95712:1275	(Tet)tetR:HF545434:53576-54226:651
ECL22868												(Tet)tetA:JX424423:94438-95712:1275	(Tet)tetR:HF545434:53576-54226:651
SRR11045320											(Sul)sul3:HQ875016:7396-8187:792	(Tet)tetA:JX424423:94438-95712:1275	(Tet)tetR:HF545434:53576-54226:651
SRR11045323												(Tet)tetA:JX424423:94438-95712:1275	(Tet)tetR:HF545434:53576-54226:651
SRR11045324												(Tet)tetA:JX424423:94438-95712:1275	(Tet)tetR:HF545434:53576-54226:651
SRR11046294		(AGly)aph(3'')-Ia:FJ172370:38668-39483:816	(AGly)aph(3')-Ic:KP119857:914-1729:816	(AGly)aph3-Ia:HQ840942:23569-24384:816					(Sul)sul2:EU360945:1617-2432:816					(MLS)mph(A):DQ445270:1626-2531:1230	(Phe)floR:AKLJ01000508:383-1597:1215	(Sul)sul1:AF071413:6700-7539:840	(Tmt)dfrA12:Z21672:310-807:498
SRR11046297												(Tet)tetA:JX424423:94438-95712:1275	(Tet)tetR:HF545434:53576-54226:651
SRR11046300												(Tet)tetA:JX424423:94438-95712:1275	(Tet)tetR:HF545434:53576-54226:651
SRR11046301												(Tet)tetA:JX424423:94438-95712:1275	(Tet)tetR:HF545434:53576-54226:651					(AGly)aac3-VIa:M88012:193-1092:900	(AGly)aadA1:M95287:3320-4111:792	(AGly)aadA1-pm:JQ690540:7968-8798:831	(AGly)aadA11:AJ567827:1-792:792	(AGly)aadA12:AY665771:1-792:792	(AGly)aadA15:DQ393783:1800-2591:792	(AGly)aadA17:FJ460181:774-1565:792	(AGly)aadA21:AY171244:47-838:792	(AGly)aadA22:AM261837:74-865:792	(AGly)aadA23:AJ809407:119-898:781	(AGly)aadA24:HQ123586:88-768:781	(AGly)aadA3:AF047479:1296-2087:792	(AGly)aadA8:AF326210:1-792:792	(AGly)aadA8b:AM040708:1174-1965:792	(Tmt)dfrA15:JN108895:93-551:474	(Tmt)dfrA15b:AJ867237:177-650:474
SRR11046303		(AGly)aph(3'')-Ia:FJ172370:38668-39483:816	(AGly)aph(3')-Ic:KP119857:914-1729:816	(AGly)aph3-Ia:HQ840942:23569-24384:816								(Tet)tetA:JX424423:94438-95712:1275	(Tet)tetR:HF545434:53576-54226:651				(Tmt)dfrA12:Z21672:310-807:498				(AGly)aadA11:AJ567827:1-792:792	(AGly)aadA12:AY665771:1-792:792	(AGly)aadA15:DQ393783:1800-2591:792	(AGly)aadA17:FJ460181:774-1565:792	(AGly)aadA21:AY171244:47-838:792	(AGly)aadA22:AM261837:74-865:792	(AGly)aadA23:AJ809407:119-898:781		(AGly)aadA3:AF047479:1296-2087:792	(AGly)aadA8:AF326210:1-792:792	(AGly)aadA8b:AM040708:1174-1965:792			(AGly)aadA2:X68227:66-945:780
SRR11046874
SRR11046875												(Tet)tetA:JX424423:94438-95712:1275	(Tet)tetR:HF545434:53576-54226:651
SRR11046877												(Tet)tetA:JX424423:94438-95712:1275	(Tet)tetR:HF545434:53576-54226:651
SRR11046878															(Phe)floR:AKLJ01000508:383-1597:1215
SRR11047446		(AGly)aph(3'')-Ia:FJ172370:38668-39483:816	(AGly)aph(3')-Ic:KP119857:914-1729:816	(AGly)aph3-Ia:HQ840942:23569-24384:816		(AGly)strA:AB366441:22458-23261:804	(AGly)strB:FJ474091:264-1100:837		(Sul)sul2:EU360945:1617-2432:816	(Tet)tetB:AB089594:1-1206:1206		(Tet)tetA:JX424423:94438-95712:1275	(Tet)tetR:HF545434:53576-54226:651	(MLS)mph(A):DQ445270:1626-2531:1230	(Phe)floR:AKLJ01000508:383-1597:1215	(Sul)sul1:AF071413:6700-7539:840			(AGly)aadA1:M95287:3320-4111:792	(AGly)aadA1-pm:JQ690540:7968-8798:831	(AGly)aadA11:AJ567827:1-792:792	(AGly)aadA12:AY665771:1-792:792	(AGly)aadA15:DQ393783:1800-2591:792	(AGly)aadA17:FJ460181:774-1565:792	(AGly)aadA21:AY171244:47-838:792	(AGly)aadA22:AM261837:74-865:792	(AGly)aadA23:AJ809407:119-898:781	(AGly)aadA24:HQ123586:88-768:781	(AGly)aadA3:AF047479:1296-2087:792	(AGly)aadA8:AF326210:1-792:792	(AGly)aadA8b:AM040708:1174-1965:792			(AGly)aadA2:X68227:66-945:780	(AGly)aac3-IIa:X51534:91-951:861	(AGly)aac3-IIc:X54723:819-1679:861	(AGly)aac3-IId:EU022314:1-861:861	(AGly)aac3-IIe:EU022315:1-861:861	(MLS)mph(B):D85892:1159-2067:909	(MLS)mph(E):JF769133:8777-9661:885	(MLS)mph(F):NG_047997:101-1000:900	(MLS)msr(E):JF769133:7246-8721:1476
SRR11048585		(AGly)aph(3'')-Ia:FJ172370:38668-39483:816	(AGly)aph(3')-Ic:KP119857:914-1729:816	(AGly)aph3-Ia:HQ840942:23569-24384:816								(Tet)tetA:JX424423:94438-95712:1275	(Tet)tetR:HF545434:53576-54226:651			(Sul)sul1:AF071413:6700-7539:840		(AGly)aac3-VIa:M88012:193-1092:900	(AGly)aadA1:M95287:3320-4111:792	(AGly)aadA1-pm:JQ690540:7968-8798:831	(AGly)aadA11:AJ567827:1-792:792	(AGly)aadA12:AY665771:1-792:792	(AGly)aadA15:DQ393783:1800-2591:792	(AGly)aadA17:FJ460181:774-1565:792	(AGly)aadA21:AY171244:47-838:792	(AGly)aadA22:AM261837:74-865:792	(AGly)aadA23:AJ809407:119-898:781	(AGly)aadA24:HQ123586:88-768:781	(AGly)aadA3:AF047479:1296-2087:792	(AGly)aadA8:AF326210:1-792:792	(AGly)aadA8b:AM040708:1174-1965:792												(Tet)tetM:DQ534550:1451-3370:1920
SRR11048588												(Tet)tetA:JX424423:94438-95712:1275	(Tet)tetR:HF545434:53576-54226:651
SRR11048592	(AGly)aac-IVa:X01385:244-1029:786	(AGly)aph(3'')-Ia:FJ172370:38668-39483:816	(AGly)aph(3')-Ic:KP119857:914-1729:816	(AGly)aph3-Ia:HQ840942:23569-24384:816	(AGly)aph4-Ia:V01499:231-1256:1026						(Sul)sul3:HQ875016:7396-8187:792	(Tet)tetA:JX424423:94438-95712:1275	(Tet)tetR:HF545434:53576-54226:651						(AGly)aadA1:M95287:3320-4111:792	(AGly)aadA1-pm:JQ690540:7968-8798:831	(AGly)aadA11:AJ567827:1-792:792	(AGly)aadA12:AY665771:1-792:792	(AGly)aadA15:DQ393783:1800-2591:792	(AGly)aadA17:FJ460181:774-1565:792	(AGly)aadA21:AY171244:47-838:792	(AGly)aadA22:AM261837:74-865:792	(AGly)aadA23:AJ809407:119-898:781	(AGly)aadA24:HQ123586:88-768:781	(AGly)aadA3:AF047479:1296-2087:792	(AGly)aadA8:AF326210:1-792:792	(AGly)aadA8b:AM040708:1174-1965:792			(AGly)aadA2:X68227:66-945:780										(Tmt)dfrA1:JQ794607:474:59-532
SRR11048595												(Tet)tetA:JX424423:94438-95712:1275	(Tet)tetR:HF545434:53576-54226:651
SRR11048596												(Tet)tetA:JX424423:94438-95712:1275	(Tet)tetR:HF545434:53576-54226:651
SRR11074150												(Tet)tetA:JX424423:94438-95712:1275	(Tet)tetR:HF545434:53576-54226:651
SRR11074152		(AGly)aph(3'')-Ia:FJ172370:38668-39483:816	(AGly)aph(3')-Ic:KP119857:914-1729:816	(AGly)aph3-Ia:HQ840942:23569-24384:816		(AGly)strA:AB366441:22458-23261:804	(AGly)strB:FJ474091:264-1100:837		(Sul)sul2:EU360945:1617-2432:816			(Tet)tetA:JX424423:94438-95712:1275	(Tet)tetR:HF545434:53576-54226:651		(Phe)floR:AKLJ01000508:383-1597:1215	(Sul)sul1:AF071413:6700-7539:840	(Tmt)dfrA12:Z21672:310-807:498	(AGly)aac3-VIa:M88012:193-1092:900	(AGly)aadA1:M95287:3320-4111:792	(AGly)aadA1-pm:JQ690540:7968-8798:831	(AGly)aadA11:AJ567827:1-792:792	(AGly)aadA12:AY665771:1-792:792	(AGly)aadA15:DQ393783:1800-2591:792	(AGly)aadA17:FJ460181:774-1565:792	(AGly)aadA21:AY171244:47-838:792	(AGly)aadA22:AM261837:74-865:792	(AGly)aadA23:AJ809407:119-898:781	(AGly)aadA24:HQ123586:88-768:781	(AGly)aadA3:AF047479:1296-2087:792	(AGly)aadA8:AF326210:1-792:792	(AGly)aadA8b:AM040708:1174-1965:792			(AGly)aadA2:X68227:66-945:780
SRR11074153												(Tet)tetA:JX424423:94438-95712:1275	(Tet)tetR:HF545434:53576-54226:651
SRR11074174												(Tet)tetA:JX424423:94438-95712:1275	(Tet)tetR:HF545434:53576-54226:651
SRR11074676												(Tet)tetA:JX424423:94438-95712:1275	(Tet)tetR:HF545434:53576-54226:651					(AGly)aac3-VIa:M88012:193-1092:900	(AGly)aadA1:M95287:3320-4111:792	(AGly)aadA1-pm:JQ690540:7968-8798:831	(AGly)aadA11:AJ567827:1-792:792	(AGly)aadA12:AY665771:1-792:792	(AGly)aadA15:DQ393783:1800-2591:792	(AGly)aadA17:FJ460181:774-1565:792	(AGly)aadA21:AY171244:47-838:792	(AGly)aadA22:AM261837:74-865:792	(AGly)aadA23:AJ809407:119-898:781	(AGly)aadA24:HQ123586:88-768:781	(AGly)aadA3:AF047479:1296-2087:792	(AGly)aadA8:AF326210:1-792:792	(AGly)aadA8b:AM040708:1174-1965:792	(Tmt)dfrA15:JN108895:93-551:474	(Tmt)dfrA15b:AJ867237:177-650:474
SRR11074677												(Tet)tetA:JX424423:94438-95712:1275	(Tet)tetR:HF545434:53576-54226:651
SRR11074679		(AGly)aph(3'')-Ia:FJ172370:38668-39483:816	(AGly)aph(3')-Ic:KP119857:914-1729:816	(AGly)aph3-Ia:HQ840942:23569-24384:816								(Tet)tetA:JX424423:94438-95712:1275	(Tet)tetR:HF545434:53576-54226:651
SRR11074680		(AGly)aph(3'')-Ia:FJ172370:38668-39483:816	(AGly)aph(3')-Ic:KP119857:914-1729:816	(AGly)aph3-Ia:HQ840942:23569-24384:816								(Tet)tetA:JX424423:94438-95712:1275	(Tet)tetR:HF545434:53576-54226:651
SRR11074681		(AGly)aph(3'')-Ia:FJ172370:38668-39483:816	(AGly)aph(3')-Ic:KP119857:914-1729:816	(AGly)aph3-Ia:HQ840942:23569-24384:816								(Tet)tetA:JX424423:94438-95712:1275	(Tet)tetR:HF545434:53576-54226:651				(Tmt)dfrA12:Z21672:310-807:498				(AGly)aadA11:AJ567827:1-792:792	(AGly)aadA12:AY665771:1-792:792	(AGly)aadA15:DQ393783:1800-2591:792	(AGly)aadA17:FJ460181:774-1565:792	(AGly)aadA21:AY171244:47-838:792	(AGly)aadA22:AM261837:74-865:792	(AGly)aadA23:AJ809407:119-898:781		(AGly)aadA3:AF047479:1296-2087:792	(AGly)aadA8:AF326210:1-792:792	(AGly)aadA8b:AM040708:1174-1965:792			(AGly)aadA2:X68227:66-945:780
SRR11074684						(AGly)strA:AB366441:22458-23261:804	(AGly)strB:FJ474091:264-1100:837		(Sul)sul2:EU360945:1617-2432:816		(Sul)sul3:HQ875016:7396-8187:792	(Tet)tetA:JX424423:94438-95712:1275	(Tet)tetR:HF545434:53576-54226:651						(AGly)aadA1:M95287:3320-4111:792	(AGly)aadA1-pm:JQ690540:7968-8798:831	(AGly)aadA11:AJ567827:1-792:792	(AGly)aadA12:AY665771:1-792:792	(AGly)aadA15:DQ393783:1800-2591:792	(AGly)aadA17:FJ460181:774-1565:792	(AGly)aadA21:AY171244:47-838:792	(AGly)aadA22:AM261837:74-865:792	(AGly)aadA23:AJ809407:119-898:781	(AGly)aadA24:HQ123586:88-768:781	(AGly)aadA3:AF047479:1296-2087:792	(AGly)aadA8:AF326210:1-792:792	(AGly)aadA8b:AM040708:1174-1965:792			(AGly)aadA2:X68227:66-945:780											(AGly)aadB:JQ690540:4275-4808:534	(Phe)cmlA1:M64556:601-1860:1260	(Phe)cmlA10:NG_047649:1-1260:1260	(Phe)cmlA4:NG_047652:101-1360:1260	(Phe)cmlA5:HQ141279:907-2166:1260
SRR11074686						(AGly)strA:AB366441:22458-23261:804	(AGly)strB:FJ474091:264-1100:837		(Sul)sul2:EU360945:1617-2432:816			(Tet)tetA:JX424423:94438-95712:1275	(Tet)tetR:HF545434:53576-54226:651		(Phe)floR:AKLJ01000508:383-1597:1215	(Sul)sul1:AF071413:6700-7539:840		(AGly)aac3-VIa:M88012:193-1092:900	(AGly)aadA1:M95287:3320-4111:792						(AGly)aadA21:AY171244:47-838:792	(AGly)aadA22:AM261837:74-865:792	(AGly)aadA23:AJ809407:119-898:781													(MLS)mph(E):JF769133:8777-9661:885		(MLS)msr(E):JF769133:7246-8721:1476
SRR11074688		(AGly)aph(3'')-Ia:FJ172370:38668-39483:816	(AGly)aph(3')-Ic:KP119857:914-1729:816	(AGly)aph3-Ia:HQ840942:23569-24384:816								(Tet)tetA:JX424423:94438-95712:1275	(Tet)tetR:HF545434:53576-54226:651
SRR11074697		(AGly)aph(3'')-Ia:FJ172370:38668-39483:816	(AGly)aph(3')-Ic:KP119857:914-1729:816	(AGly)aph3-Ia:HQ840942:23569-24384:816		(AGly)strA:AB366441:22458-23261:804	(AGly)strB:FJ474091:264-1100:837		(Sul)sul2:EU360945:1617-2432:816			(Tet)tetA:JX424423:94438-95712:1275	(Tet)tetR:HF545434:53576-54226:651		(Phe)floR:AKLJ01000508:383-1597:1215	(Sul)sul1:AF071413:6700-7539:840		(AGly)aac3-VIa:M88012:193-1092:900	(AGly)aadA1:M95287:3320-4111:792						(AGly)aadA21:AY171244:47-838:792	(AGly)aadA22:AM261837:74-865:792	(AGly)aadA23:AJ809407:119-898:781																(Tet)tetM:DQ534550:1451-3370:1920
SRR11074704		(AGly)aph(3'')-Ia:FJ172370:38668-39483:816	(AGly)aph(3')-Ic:KP119857:914-1729:816	(AGly)aph3-Ia:HQ840942:23569-24384:816							(Sul)sul3:HQ875016:7396-8187:792	(Tet)tetA:JX424423:94438-95712:1275	(Tet)tetR:HF545434:53576-54226:651						(AGly)aadA1:M95287:3320-4111:792	(AGly)aadA1-pm:JQ690540:7968-8798:831	(AGly)aadA11:AJ567827:1-792:792	(AGly)aadA12:AY665771:1-792:792	(AGly)aadA15:DQ393783:1800-2591:792	(AGly)aadA17:FJ460181:774-1565:792	(AGly)aadA21:AY171244:47-838:792	(AGly)aadA22:AM261837:74-865:792	(AGly)aadA23:AJ809407:119-898:781	(AGly)aadA24:HQ123586:88-768:781	(AGly)aadA3:AF047479:1296-2087:792	(AGly)aadA8:AF326210:1-792:792	(AGly)aadA8b:AM040708:1174-1965:792			(AGly)aadA2:X68227:66-945:780	(AGly)aac3-IIa:X51534:91-951:861	(AGly)aac3-IIc:X54723:819-1679:861	(AGly)aac3-IId:EU022314:1-861:861	(AGly)aac3-IIe:EU022315:1-861:861					(Tet)tetM:DQ534550:1451-3370:1920			(Phe)cmlA1:M64556:601-1860:1260	(Phe)cmlA10:NG_047649:1-1260:1260	(Phe)cmlA4:NG_047652:101-1360:1260	(Phe)cmlA5:HQ141279:907-2166:1260
SRR11074708		(AGly)aph(3'')-Ia:FJ172370:38668-39483:816	(AGly)aph(3')-Ic:KP119857:914-1729:816	(AGly)aph3-Ia:HQ840942:23569-24384:816		(AGly)strA:AB366441:22458-23261:804	(AGly)strB:FJ474091:264-1100:837		(Sul)sul2:EU360945:1617-2432:816			(Tet)tetA:JX424423:94438-95712:1275	(Tet)tetR:HF545434:53576-54226:651		(Phe)floR:AKLJ01000508:383-1597:1215	(Sul)sul1:AF071413:6700-7539:840		(AGly)aac3-VIa:M88012:193-1092:900	(AGly)aadA1:M95287:3320-4111:792	(AGly)aadA1-pm:JQ690540:7968-8798:831	(AGly)aadA11:AJ567827:1-792:792	(AGly)aadA12:AY665771:1-792:792	(AGly)aadA15:DQ393783:1800-2591:792	(AGly)aadA17:FJ460181:774-1565:792	(AGly)aadA21:AY171244:47-838:792	(AGly)aadA22:AM261837:74-865:792	(AGly)aadA23:AJ809407:119-898:781	(AGly)aadA24:HQ123586:88-768:781	(AGly)aadA3:AF047479:1296-2087:792	(AGly)aadA8:AF326210:1-792:792	(AGly)aadA8b:AM040708:1174-1965:792			(AGly)aadA2:X68227:66-945:780
SRR11074710												(Tet)tetA:JX424423:94438-95712:1275	(Tet)tetR:HF545434:53576-54226:651
SRR11074716	(AGly)aac-IVa:X01385:244-1029:786	(AGly)aph(3'')-Ia:FJ172370:38668-39483:816	(AGly)aph(3')-Ic:KP119857:914-1729:816	(AGly)aph3-Ia:HQ840942:23569-24384:816	(AGly)aph4-Ia:V01499:231-1256:1026						(Sul)sul3:HQ875016:7396-8187:792	(Tet)tetA:JX424423:94438-95712:1275	(Tet)tetR:HF545434:53576-54226:651						(AGly)aadA1:M95287:3320-4111:792	(AGly)aadA1-pm:JQ690540:7968-8798:831	(AGly)aadA11:AJ567827:1-792:792	(AGly)aadA12:AY665771:1-792:792	(AGly)aadA15:DQ393783:1800-2591:792	(AGly)aadA17:FJ460181:774-1565:792	(AGly)aadA21:AY171244:47-838:792	(AGly)aadA22:AM261837:74-865:792	(AGly)aadA23:AJ809407:119-898:781	(AGly)aadA24:HQ123586:88-768:781	(AGly)aadA3:AF047479:1296-2087:792	(AGly)aadA8:AF326210:1-792:792	(AGly)aadA8b:AM040708:1174-1965:792			(AGly)aadA2:X68227:66-945:780												(Phe)cmlA1:M64556:601-1860:1260	(Phe)cmlA10:NG_047649:1-1260:1260	(Phe)cmlA4:NG_047652:101-1360:1260	(Phe)cmlA5:HQ141279:907-2166:1260
SRR6121969												(Tet)tetA:JX424423:94438-95712:1275	(Tet)tetR:HF545434:53576-54226:651
SRR7213569		(AGly)aph(3'')-Ia:FJ172370:38668-39483:816	(AGly)aph(3')-Ic:KP119857:914-1729:816	(AGly)aph3-Ia:HQ840942:23569-24384:816		(AGly)strA:AB366441:22458-23261:804	(AGly)strB:FJ474091:264-1100:837		(Sul)sul2:EU360945:1617-2432:816			(Tet)tetA:JX424423:94438-95712:1275	(Tet)tetR:HF545434:53576-54226:651		(Phe)floR:AKLJ01000508:383-1597:1215	(Sul)sul1:AF071413:6700-7539:840																								(MLS)mph(E):JF769133:8777-9661:885		(MLS)msr(E):JF769133:7246-8721:1476		(Tmt)dfrA1:JQ794607:474:59-532
SRR7213570												(Tet)tetA:JX424423:94438-95712:1275	(Tet)tetR:HF545434:53576-54226:651
SRR7213571											(Sul)sul3:HQ875016:7396-8187:792	(Tet)tetA:JX424423:94438-95712:1275	(Tet)tetR:HF545434:53576-54226:651						(AGly)aadA1:M95287:3320-4111:792	(AGly)aadA1-pm:JQ690540:7968-8798:831	(AGly)aadA11:AJ567827:1-792:792	(AGly)aadA12:AY665771:1-792:792	(AGly)aadA15:DQ393783:1800-2591:792	(AGly)aadA17:FJ460181:774-1565:792	(AGly)aadA21:AY171244:47-838:792	(AGly)aadA22:AM261837:74-865:792	(AGly)aadA23:AJ809407:119-898:781	(AGly)aadA24:HQ123586:88-768:781	(AGly)aadA3:AF047479:1296-2087:792	(AGly)aadA8:AF326210:1-792:792	(AGly)aadA8b:AM040708:1174-1965:792			(AGly)aadA2:X68227:66-945:780												(Phe)cmlA1:M64556:601-1860:1260	(Phe)cmlA10:NG_047649:1-1260:1260	(Phe)cmlA4:NG_047652:101-1360:1260	(Phe)cmlA5:HQ141279:907-2166:1260
SRR7213572									(Sul)sul2:EU360945:1617-2432:816			(Tet)tetA:JX424423:94438-95712:1275	(Tet)tetR:HF545434:53576-54226:651			(Sul)sul1:AF071413:6700-7539:840																								(MLS)mph(E):JF769133:8777-9661:885		(MLS)msr(E):JF769133:7246-8721:1476
SRR7213573												(Tet)tetA:JX424423:94438-95712:1275	(Tet)tetR:HF545434:53576-54226:651
SRR7213575												(Tet)tetA:JX424423:94438-95712:1275	(Tet)tetR:HF545434:53576-54226:651
SRR7213576												(Tet)tetA:JX424423:94438-95712:1275	(Tet)tetR:HF545434:53576-54226:651
SRR7213578												(Tet)tetA:JX424423:94438-95712:1275	(Tet)tetR:HF545434:53576-54226:651
SRR7213579
SRR7213581												(Tet)tetA:JX424423:94438-95712:1275	(Tet)tetR:HF545434:53576-54226:651
SRR7213583												(Tet)tetA:JX424423:94438-95712:1275	(Tet)tetR:HF545434:53576-54226:651
SRR7213588												(Tet)tetA:JX424423:94438-95712:1275	(Tet)tetR:HF545434:53576-54226:651
SRR7213590												(Tet)tetA:JX424423:94438-95712:1275	(Tet)tetR:HF545434:53576-54226:651
SRR7213593		(AGly)aph(3'')-Ia:FJ172370:38668-39483:816	(AGly)aph(3')-Ic:KP119857:914-1729:816	(AGly)aph3-Ia:HQ840942:23569-24384:816								(Tet)tetA:JX424423:94438-95712:1275	(Tet)tetR:HF545434:53576-54226:651
SRR7213595												(Tet)tetA:JX424423:94438-95712:1275	(Tet)tetR:HF545434:53576-54226:651
SRR7213596		(AGly)aph(3'')-Ia:FJ172370:38668-39483:816	(AGly)aph(3')-Ic:KP119857:914-1729:816	(AGly)aph3-Ia:HQ840942:23569-24384:816		(AGly)strA:AB366441:22458-23261:804	(AGly)strB:FJ474091:264-1100:837		(Sul)sul2:EU360945:1617-2432:816			(Tet)tetA:JX424423:94438-95712:1275	(Tet)tetR:HF545434:53576-54226:651		(Phe)floR:AKLJ01000508:383-1597:1215	(Sul)sul1:AF071413:6700-7539:840		(AGly)aac3-VIa:M88012:193-1092:900	(AGly)aadA1:M95287:3320-4111:792	(AGly)aadA1-pm:JQ690540:7968-8798:831	(AGly)aadA11:AJ567827:1-792:792	(AGly)aadA12:AY665771:1-792:792	(AGly)aadA15:DQ393783:1800-2591:792	(AGly)aadA17:FJ460181:774-1565:792	(AGly)aadA21:AY171244:47-838:792	(AGly)aadA22:AM261837:74-865:792	(AGly)aadA23:AJ809407:119-898:781	(AGly)aadA24:HQ123586:88-768:781	(AGly)aadA3:AF047479:1296-2087:792	(AGly)aadA8:AF326210:1-792:792	(AGly)aadA8b:AM040708:1174-1965:792
SRR7213597												(Tet)tetA:JX424423:94438-95712:1275	(Tet)tetR:HF545434:53576-54226:651
SRR7213598									(Sul)sul2:EU360945:1617-2432:816			(Tet)tetA:JX424423:94438-95712:1275	(Tet)tetR:HF545434:53576-54226:651
SRR7213599	(AGly)aac-IVa:X01385:244-1029:786	(AGly)aph(3'')-Ia:FJ172370:38668-39483:816	(AGly)aph(3')-Ic:KP119857:914-1729:816	(AGly)aph3-Ia:HQ840942:23569-24384:816								(Tet)tetA:JX424423:94438-95712:1275	(Tet)tetR:HF545434:53576-54226:651			(Sul)sul1:AF071413:6700-7539:840	(Tmt)dfrA12:Z21672:310-807:498				(AGly)aadA11:AJ567827:1-792:792	(AGly)aadA12:AY665771:1-792:792	(AGly)aadA15:DQ393783:1800-2591:792	(AGly)aadA17:FJ460181:774-1565:792	(AGly)aadA21:AY171244:47-838:792	(AGly)aadA22:AM261837:74-865:792	(AGly)aadA23:AJ809407:119-898:781		(AGly)aadA3:AF047479:1296-2087:792	(AGly)aadA8:AF326210:1-792:792	(AGly)aadA8b:AM040708:1174-1965:792			(AGly)aadA2:X68227:66-945:780
SRR7213600												(Tet)tetA:JX424423:94438-95712:1275	(Tet)tetR:HF545434:53576-54226:651
SRR7213602		(AGly)aph(3'')-Ia:FJ172370:38668-39483:816	(AGly)aph(3')-Ic:KP119857:914-1729:816	(AGly)aph3-Ia:HQ840942:23569-24384:816		(AGly)strA:AB366441:22458-23261:804	(AGly)strB:FJ474091:264-1100:837		(Sul)sul2:EU360945:1617-2432:816			(Tet)tetA:JX424423:94438-95712:1275	(Tet)tetR:HF545434:53576-54226:651		(Phe)floR:AKLJ01000508:383-1597:1215
SRR7213603
SRR7213606												(Tet)tetA:JX424423:94438-95712:1275	(Tet)tetR:HF545434:53576-54226:651
SRR7213607		(AGly)aph(3'')-Ia:FJ172370:38668-39483:816	(AGly)aph(3')-Ic:KP119857:914-1729:816	(AGly)aph3-Ia:HQ840942:23569-24384:816								(Tet)tetA:JX424423:94438-95712:1275	(Tet)tetR:HF545434:53576-54226:651
SRR7213608												(Tet)tetA:JX424423:94438-95712:1275	(Tet)tetR:HF545434:53576-54226:651
SRR7213623												(Tet)tetA:JX424423:94438-95712:1275	(Tet)tetR:HF545434:53576-54226:651
SRR7213658		(AGly)aph(3'')-Ia:FJ172370:38668-39483:816	(AGly)aph(3')-Ic:KP119857:914-1729:816	(AGly)aph3-Ia:HQ840942:23569-24384:816		(AGly)strA:AB366441:22458-23261:804	(AGly)strB:FJ474091:264-1100:837		(Sul)sul2:EU360945:1617-2432:816			(Tet)tetA:JX424423:94438-95712:1275	(Tet)tetR:HF545434:53576-54226:651		(Phe)floR:AKLJ01000508:383-1597:1215	(Sul)sul1:AF071413:6700-7539:840		(AGly)aac3-VIa:M88012:193-1092:900	(AGly)aadA1:M95287:3320-4111:792	(AGly)aadA1-pm:JQ690540:7968-8798:831	(AGly)aadA11:AJ567827:1-792:792	(AGly)aadA12:AY665771:1-792:792	(AGly)aadA15:DQ393783:1800-2591:792	(AGly)aadA17:FJ460181:774-1565:792	(AGly)aadA21:AY171244:47-838:792	(AGly)aadA22:AM261837:74-865:792	(AGly)aadA23:AJ809407:119-898:781	(AGly)aadA24:HQ123586:88-768:781	(AGly)aadA3:AF047479:1296-2087:792	(AGly)aadA8:AF326210:1-792:792	(AGly)aadA8b:AM040708:1174-1965:792			(AGly)aadA2:X68227:66-945:780
SRR7213659		(AGly)aph(3'')-Ia:FJ172370:38668-39483:816	(AGly)aph(3')-Ic:KP119857:914-1729:816	(AGly)aph3-Ia:HQ840942:23569-24384:816								(Tet)tetA:JX424423:94438-95712:1275	(Tet)tetR:HF545434:53576-54226:651
SRR7213660		(AGly)aph(3'')-Ia:FJ172370:38668-39483:816	(AGly)aph(3')-Ic:KP119857:914-1729:816	(AGly)aph3-Ia:HQ840942:23569-24384:816		(AGly)strA:AB366441:22458-23261:804	(AGly)strB:FJ474091:264-1100:837	(Phe)catA1:V00622:244-903:660	(Sul)sul2:EU360945:1617-2432:816			(Tet)tetA:JX424423:94438-95712:1275	(Tet)tetR:HF545434:53576-54226:651		(Phe)floR:AKLJ01000508:383-1597:1215	(Sul)sul1:AF071413:6700-7539:840			(AGly)aadA1:M95287:3320-4111:792	(AGly)aadA1-pm:JQ690540:7968-8798:831	(AGly)aadA11:AJ567827:1-792:792	(AGly)aadA12:AY665771:1-792:792	(AGly)aadA15:DQ393783:1800-2591:792	(AGly)aadA17:FJ460181:774-1565:792	(AGly)aadA21:AY171244:47-838:792	(AGly)aadA22:AM261837:74-865:792	(AGly)aadA23:AJ809407:119-898:781	(AGly)aadA24:HQ123586:88-768:781	(AGly)aadA3:AF047479:1296-2087:792	(AGly)aadA8:AF326210:1-792:792	(AGly)aadA8b:AM040708:1174-1965:792				(AGly)aac3-IIa:X51534:91-951:861	(AGly)aac3-IIc:X54723:819-1679:861	(AGly)aac3-IId:EU022314:1-861:861	(AGly)aac3-IIe:EU022315:1-861:861
SRR8157048								(Phe)catA1:V00622:244-903:660			(Sul)sul3:HQ875016:7396-8187:792	(Tet)tetA:JX424423:94438-95712:1275	(Tet)tetR:HF545434:53576-54226:651			(Sul)sul1:AF071413:6700-7539:840			(AGly)aadA1:M95287:3320-4111:792	(AGly)aadA1-pm:JQ690540:7968-8798:831	(AGly)aadA11:AJ567827:1-792:792	(AGly)aadA12:AY665771:1-792:792	(AGly)aadA15:DQ393783:1800-2591:792	(AGly)aadA17:FJ460181:774-1565:792	(AGly)aadA21:AY171244:47-838:792	(AGly)aadA22:AM261837:74-865:792	(AGly)aadA23:AJ809407:119-898:781	(AGly)aadA24:HQ123586:88-768:781	(AGly)aadA3:AF047479:1296-2087:792	(AGly)aadA8:AF326210:1-792:792	(AGly)aadA8b:AM040708:1174-1965:792															(Phe)cmlA1:M64556:601-1860:1260	(Phe)cmlA10:NG_047649:1-1260:1260	(Phe)cmlA4:NG_047652:101-1360:1260	(Phe)cmlA5:HQ141279:907-2166:1260
SRR8901382												(Tet)tetA:JX424423:94438-95712:1275	(Tet)tetR:HF545434:53576-54226:651
SRR8901386												(Tet)tetA:JX424423:94438-95712:1275	(Tet)tetR:HF545434:53576-54226:651
SRR8901388
SRR8901392												(Tet)tetA:JX424423:94438-95712:1275	(Tet)tetR:HF545434:53576-54226:651
SRR8901396						(AGly)strA:AB366441:22458-23261:804	(AGly)strB:FJ474091:264-1100:837	(Phe)catA1:V00622:244-903:660	(Sul)sul2:EU360945:1617-2432:816	(Tet)tetB:AB089594:1-1206:1206				(MLS)mph(A):DQ445270:1626-2531:1230		(Sul)sul1:AF071413:6700-7539:840	(Tmt)dfrA12:Z21672:310-807:498				(AGly)aadA11:AJ567827:1-792:792	(AGly)aadA12:AY665771:1-792:792	(AGly)aadA15:DQ393783:1800-2591:792	(AGly)aadA17:FJ460181:774-1565:792	(AGly)aadA21:AY171244:47-838:792	(AGly)aadA22:AM261837:74-865:792	(AGly)aadA23:AJ809407:119-898:781		(AGly)aadA3:AF047479:1296-2087:792	(AGly)aadA8:AF326210:1-792:792	(AGly)aadA8b:AM040708:1174-1965:792			(AGly)aadA2:X68227:66-945:780	(AGly)aac3-IIa:X51534:91-951:861	(AGly)aac3-IIc:X54723:819-1679:861	(AGly)aac3-IId:EU022314:1-861:861	(AGly)aac3-IIe:EU022315:1-861:861
SRR8901397												(Tet)tetA:JX424423:94438-95712:1275	(Tet)tetR:HF545434:53576-54226:651
SRR8901398	(AGly)aac-IVa:X01385:244-1029:786				(AGly)aph4-Ia:V01499:231-1256:1026	(AGly)strA:AB366441:22458-23261:804	(AGly)strB:FJ474091:264-1100:837			(Tet)tetB:AB089594:1-1206:1206		(Tet)tetA:JX424423:94438-95712:1275	(Tet)tetR:HF545434:53576-54226:651
SRR8901402												(Tet)tetA:JX424423:94438-95712:1275	(Tet)tetR:HF545434:53576-54226:651
SRR8901404												(Tet)tetA:JX424423:94438-95712:1275	(Tet)tetR:HF545434:53576-54226:651
SRR8901430		(AGly)aph(3'')-Ia:FJ172370:38668-39483:816	(AGly)aph(3')-Ic:KP119857:914-1729:816	(AGly)aph3-Ia:HQ840942:23569-24384:816								(Tet)tetA:JX424423:94438-95712:1275	(Tet)tetR:HF545434:53576-54226:651				(Tmt)dfrA12:Z21672:310-807:498				(AGly)aadA11:AJ567827:1-792:792	(AGly)aadA12:AY665771:1-792:792	(AGly)aadA15:DQ393783:1800-2591:792	(AGly)aadA17:FJ460181:774-1565:792	(AGly)aadA21:AY171244:47-838:792	(AGly)aadA22:AM261837:74-865:792	(AGly)aadA23:AJ809407:119-898:781		(AGly)aadA3:AF047479:1296-2087:792	(AGly)aadA8:AF326210:1-792:792	(AGly)aadA8b:AM040708:1174-1965:792			(AGly)aadA2:X68227:66-945:780
SRR8901439		(AGly)aph(3'')-Ia:FJ172370:38668-39483:816	(AGly)aph(3')-Ic:KP119857:914-1729:816	(AGly)aph3-Ia:HQ840942:23569-24384:816							(Sul)sul3:HQ875016:7396-8187:792	(Tet)tetA:JX424423:94438-95712:1275	(Tet)tetR:HF545434:53576-54226:651			(Sul)sul1:AF071413:6700-7539:840			(AGly)aadA1:M95287:3320-4111:792	(AGly)aadA1-pm:JQ690540:7968-8798:831	(AGly)aadA11:AJ567827:1-792:792	(AGly)aadA12:AY665771:1-792:792	(AGly)aadA15:DQ393783:1800-2591:792	(AGly)aadA17:FJ460181:774-1565:792	(AGly)aadA21:AY171244:47-838:792	(AGly)aadA22:AM261837:74-865:792	(AGly)aadA23:AJ809407:119-898:781	(AGly)aadA24:HQ123586:88-768:781	(AGly)aadA3:AF047479:1296-2087:792	(AGly)aadA8:AF326210:1-792:792	(AGly)aadA8b:AM040708:1174-1965:792			(AGly)aadA2:X68227:66-945:780											(AGly)aadB:JQ690540:4275-4808:534	(Phe)cmlA1:M64556:601-1860:1260	(Phe)cmlA10:NG_047649:1-1260:1260	(Phe)cmlA4:NG_047652:101-1360:1260	(Phe)cmlA5:HQ141279:907-2166:1260
SRR8901452						(AGly)strA:AB366441:22458-23261:804	(AGly)strB:FJ474091:264-1100:837		(Sul)sul2:EU360945:1617-2432:816			(Tet)tetA:JX424423:94438-95712:1275	(Tet)tetR:HF545434:53576-54226:651			(Sul)sul1:AF071413:6700-7539:840		(AGly)aac3-VIa:M88012:193-1092:900	(AGly)aadA1:M95287:3320-4111:792						(AGly)aadA21:AY171244:47-838:792	(AGly)aadA22:AM261837:74-865:792	(AGly)aadA23:AJ809407:119-898:781
SRR9913963												(Tet)tetA:JX424423:94438-95712:1275	(Tet)tetR:HF545434:53576-54226:651
SRR9914120						(AGly)strA:AB366441:22458-23261:804	(AGly)strB:FJ474091:264-1100:837		(Sul)sul2:EU360945:1617-2432:816			(Tet)tetA:JX424423:94438-95712:1275	(Tet)tetR:HF545434:53576-54226:651		(Phe)floR:AKLJ01000508:383-1597:1215	(Sul)sul1:AF071413:6700-7539:840		(AGly)aac3-VIa:M88012:193-1092:900	(AGly)aadA1:M95287:3320-4111:792						(AGly)aadA21:AY171244:47-838:792	(AGly)aadA22:AM261837:74-865:792	(AGly)aadA23:AJ809407:119-898:781
ECL16273						(AGly)strA:AB366441:22458-23261:804	(AGly)strB:FJ474091:264-1100:837	(Phe)catA1:V00622:244-903:660		(Tet)tetB:AB089594:1-1206:1206						(Sul)sul1:AF071413:6700-7539:840			(AGly)aadA1:M95287:3320-4111:792	(AGly)aadA1-pm:JQ690540:7968-8798:831	(AGly)aadA11:AJ567827:1-792:792	(AGly)aadA12:AY665771:1-792:792	(AGly)aadA15:DQ393783:1800-2591:792	(AGly)aadA17:FJ460181:774-1565:792	(AGly)aadA21:AY171244:47-838:792	(AGly)aadA22:AM261837:74-865:792	(AGly)aadA23:AJ809407:119-898:781	(AGly)aadA24:HQ123586:88-768:781	(AGly)aadA3:AF047479:1296-2087:792	(AGly)aadA8:AF326210:1-792:792	(AGly)aadA8b:AM040708:1174-1965:792													(Tmt)dfrA1:JQ794607:474:59-532
ECL17377						(AGly)strA:AB366441:22458-23261:804	(AGly)strB:FJ474091:264-1100:837	(Phe)catA1:V00622:244-903:660		(Tet)tetB:AB089594:1-1206:1206						(Sul)sul1:AF071413:6700-7539:840			(AGly)aadA1:M95287:3320-4111:792	(AGly)aadA1-pm:JQ690540:7968-8798:831	(AGly)aadA11:AJ567827:1-792:792	(AGly)aadA12:AY665771:1-792:792	(AGly)aadA15:DQ393783:1800-2591:792	(AGly)aadA17:FJ460181:774-1565:792	(AGly)aadA21:AY171244:47-838:792	(AGly)aadA22:AM261837:74-865:792	(AGly)aadA23:AJ809407:119-898:781	(AGly)aadA24:HQ123586:88-768:781	(AGly)aadA3:AF047479:1296-2087:792	(AGly)aadA8:AF326210:1-792:792	(AGly)aadA8b:AM040708:1174-1965:792													(Tmt)dfrA1:JQ794607:474:59-532
ECL19602	(AGly)aac-IVa:X01385:244-1029:786				(AGly)aph4-Ia:V01499:231-1256:1026	(AGly)strA:AB366441:22458-23261:804	(AGly)strB:FJ474091:264-1100:837		(Sul)sul2:EU360945:1617-2432:816			(Tet)tetA:JX424423:94438-95712:1275	(Tet)tetR:HF545434:53576-54226:651			(Sul)sul1:AF071413:6700-7539:840	(Tmt)dfrA12:Z21672:310-807:498		(AGly)aadA1:M95287:3320-4111:792	(AGly)aadA1-pm:JQ690540:7968-8798:831	(AGly)aadA11:AJ567827:1-792:792	(AGly)aadA12:AY665771:1-792:792	(AGly)aadA15:DQ393783:1800-2591:792	(AGly)aadA17:FJ460181:774-1565:792	(AGly)aadA21:AY171244:47-838:792	(AGly)aadA22:AM261837:74-865:792	(AGly)aadA23:AJ809407:119-898:781	(AGly)aadA24:HQ123586:88-768:781	(AGly)aadA3:AF047479:1296-2087:792	(AGly)aadA8:AF326210:1-792:792	(AGly)aadA8b:AM040708:1174-1965:792			(AGly)aadA2:X68227:66-945:780									(Tet)tetM:DQ534550:1451-3370:1920	(Tmt)dfrA1:JQ794607:474:59-532
ECL19820						(AGly)strA:AB366441:22458-23261:804	(AGly)strB:FJ474091:264-1100:837	(Phe)catA1:V00622:244-903:660		(Tet)tetB:AB089594:1-1206:1206						(Sul)sul1:AF071413:6700-7539:840			(AGly)aadA1:M95287:3320-4111:792	(AGly)aadA1-pm:JQ690540:7968-8798:831	(AGly)aadA11:AJ567827:1-792:792	(AGly)aadA12:AY665771:1-792:792	(AGly)aadA15:DQ393783:1800-2591:792	(AGly)aadA17:FJ460181:774-1565:792	(AGly)aadA21:AY171244:47-838:792	(AGly)aadA22:AM261837:74-865:792	(AGly)aadA23:AJ809407:119-898:781	(AGly)aadA24:HQ123586:88-768:781	(AGly)aadA3:AF047479:1296-2087:792	(AGly)aadA8:AF326210:1-792:792	(AGly)aadA8b:AM040708:1174-1965:792													(Tmt)dfrA1:JQ794607:474:59-532
ECL19931								(Phe)catA1:V00622:244-903:660								(Sul)sul1:AF071413:6700-7539:840			(AGly)aadA1:M95287:3320-4111:792	(AGly)aadA1-pm:JQ690540:7968-8798:831	(AGly)aadA11:AJ567827:1-792:792	(AGly)aadA12:AY665771:1-792:792	(AGly)aadA15:DQ393783:1800-2591:792	(AGly)aadA17:FJ460181:774-1565:792	(AGly)aadA21:AY171244:47-838:792	(AGly)aadA22:AM261837:74-865:792	(AGly)aadA23:AJ809407:119-898:781	(AGly)aadA24:HQ123586:88-768:781	(AGly)aadA3:AF047479:1296-2087:792	(AGly)aadA8:AF326210:1-792:792	(AGly)aadA8b:AM040708:1174-1965:792			(AGly)aadA2:X68227:66-945:780										(Tmt)dfrA1:JQ794607:474:59-532		(Phe)cmlA1:M64556:601-1860:1260	(Phe)cmlA10:NG_047649:1-1260:1260	(Phe)cmlA4:NG_047652:101-1360:1260	(Phe)cmlA5:HQ141279:907-2166:1260
ECL19990		(AGly)aph(3'')-Ia:FJ172370:38668-39483:816	(AGly)aph(3')-Ic:KP119857:914-1729:816	(AGly)aph3-Ia:HQ840942:23569-24384:816				(Phe)catA1:V00622:244-903:660			(Sul)sul3:HQ875016:7396-8187:792	(Tet)tetA:JX424423:94438-95712:1275	(Tet)tetR:HF545434:53576-54226:651			(Sul)sul1:AF071413:6700-7539:840			(AGly)aadA1:M95287:3320-4111:792	(AGly)aadA1-pm:JQ690540:7968-8798:831	(AGly)aadA11:AJ567827:1-792:792	(AGly)aadA12:AY665771:1-792:792	(AGly)aadA15:DQ393783:1800-2591:792	(AGly)aadA17:FJ460181:774-1565:792	(AGly)aadA21:AY171244:47-838:792	(AGly)aadA22:AM261837:74-865:792	(AGly)aadA23:AJ809407:119-898:781	(AGly)aadA24:HQ123586:88-768:781	(AGly)aadA3:AF047479:1296-2087:792	(AGly)aadA8:AF326210:1-792:792	(AGly)aadA8b:AM040708:1174-1965:792			(AGly)aadA2:X68227:66-945:780									(Tet)tetM:DQ534550:1451-3370:1920	(Tmt)dfrA1:JQ794607:474:59-532		(Phe)cmlA1:M64556:601-1860:1260	(Phe)cmlA10:NG_047649:1-1260:1260	(Phe)cmlA4:NG_047652:101-1360:1260	(Phe)cmlA5:HQ141279:907-2166:1260
ECL20797					(AGly)aph4-Ia:V01499:231-1256:1026	(AGly)strA:AB366441:22458-23261:804	(AGly)strB:FJ474091:264-1100:837		(Sul)sul2:EU360945:1617-2432:816			(Tet)tetA:JX424423:94438-95712:1275	(Tet)tetR:HF545434:53576-54226:651						(AGly)aadA1:M95287:3320-4111:792	(AGly)aadA1-pm:JQ690540:7968-8798:831	(AGly)aadA11:AJ567827:1-792:792	(AGly)aadA12:AY665771:1-792:792	(AGly)aadA15:DQ393783:1800-2591:792	(AGly)aadA17:FJ460181:774-1565:792	(AGly)aadA21:AY171244:47-838:792	(AGly)aadA22:AM261837:74-865:792	(AGly)aadA23:AJ809407:119-898:781	(AGly)aadA24:HQ123586:88-768:781	(AGly)aadA3:AF047479:1296-2087:792	(AGly)aadA8:AF326210:1-792:792	(AGly)aadA8b:AM040708:1174-1965:792												(Tet)tetM:DQ534550:1451-3370:1920	(Tmt)dfrA1:JQ794607:474:59-532
ECL21756						(AGly)strA:AB366441:22458-23261:804	(AGly)strB:FJ474091:264-1100:837		(Sul)sul2:EU360945:1617-2432:816			(Tet)tetA:JX424423:94438-95712:1275	(Tet)tetR:HF545434:53576-54226:651						(AGly)aadA1:M95287:3320-4111:792	(AGly)aadA1-pm:JQ690540:7968-8798:831	(AGly)aadA11:AJ567827:1-792:792	(AGly)aadA12:AY665771:1-792:792	(AGly)aadA15:DQ393783:1800-2591:792	(AGly)aadA17:FJ460181:774-1565:792	(AGly)aadA21:AY171244:47-838:792	(AGly)aadA22:AM261837:74-865:792	(AGly)aadA23:AJ809407:119-898:781	(AGly)aadA24:HQ123586:88-768:781	(AGly)aadA3:AF047479:1296-2087:792	(AGly)aadA8:AF326210:1-792:792	(AGly)aadA8b:AM040708:1174-1965:792												(Tet)tetM:DQ534550:1451-3370:1920	(Tmt)dfrA1:JQ794607:474:59-532
ECL22341						(AGly)strA:AB366441:22458-23261:804	(AGly)strB:FJ474091:264-1100:837		(Sul)sul2:EU360945:1617-2432:816			(Tet)tetA:JX424423:94438-95712:1275	(Tet)tetR:HF545434:53576-54226:651						(AGly)aadA1:M95287:3320-4111:792	(AGly)aadA1-pm:JQ690540:7968-8798:831	(AGly)aadA11:AJ567827:1-792:792	(AGly)aadA12:AY665771:1-792:792	(AGly)aadA15:DQ393783:1800-2591:792	(AGly)aadA17:FJ460181:774-1565:792	(AGly)aadA21:AY171244:47-838:792	(AGly)aadA22:AM261837:74-865:792	(AGly)aadA23:AJ809407:119-898:781	(AGly)aadA24:HQ123586:88-768:781	(AGly)aadA3:AF047479:1296-2087:792	(AGly)aadA8:AF326210:1-792:792	(AGly)aadA8b:AM040708:1174-1965:792												(Tet)tetM:DQ534550:1451-3370:1920	(Tmt)dfrA1:JQ794607:474:59-532
ECL22529	(AGly)aac-IVa:X01385:244-1029:786	(AGly)aph(3'')-Ia:FJ172370:38668-39483:816	(AGly)aph(3')-Ic:KP119857:914-1729:816	(AGly)aph3-Ia:HQ840942:23569-24384:816	(AGly)aph4-Ia:V01499:231-1256:1026	(AGly)strA:AB366441:22458-23261:804	(AGly)strB:FJ474091:264-1100:837		(Sul)sul2:EU360945:1617-2432:816			(Tet)tetA:JX424423:94438-95712:1275	(Tet)tetR:HF545434:53576-54226:651		(Phe)floR:AKLJ01000508:383-1597:1215				(AGly)aadA1:M95287:3320-4111:792	(AGly)aadA1-pm:JQ690540:7968-8798:831	(AGly)aadA11:AJ567827:1-792:792	(AGly)aadA12:AY665771:1-792:792	(AGly)aadA15:DQ393783:1800-2591:792	(AGly)aadA17:FJ460181:774-1565:792	(AGly)aadA21:AY171244:47-838:792	(AGly)aadA22:AM261837:74-865:792	(AGly)aadA23:AJ809407:119-898:781	(AGly)aadA24:HQ123586:88-768:781	(AGly)aadA3:AF047479:1296-2087:792	(AGly)aadA8:AF326210:1-792:792	(AGly)aadA8b:AM040708:1174-1965:792													(Tmt)dfrA1:JQ794607:474:59-532
ECL22653	(AGly)aac-IVa:X01385:244-1029:786	(AGly)aph(3'')-Ia:FJ172370:38668-39483:816	(AGly)aph(3')-Ic:KP119857:914-1729:816	(AGly)aph3-Ia:HQ840942:23569-24384:816	(AGly)aph4-Ia:V01499:231-1256:1026	(AGly)strA:AB366441:22458-23261:804	(AGly)strB:FJ474091:264-1100:837		(Sul)sul2:EU360945:1617-2432:816			(Tet)tetA:JX424423:94438-95712:1275	(Tet)tetR:HF545434:53576-54226:651		(Phe)floR:AKLJ01000508:383-1597:1215				(AGly)aadA1:M95287:3320-4111:792	(AGly)aadA1-pm:JQ690540:7968-8798:831	(AGly)aadA11:AJ567827:1-792:792	(AGly)aadA12:AY665771:1-792:792	(AGly)aadA15:DQ393783:1800-2591:792	(AGly)aadA17:FJ460181:774-1565:792	(AGly)aadA21:AY171244:47-838:792	(AGly)aadA22:AM261837:74-865:792	(AGly)aadA23:AJ809407:119-898:781	(AGly)aadA24:HQ123586:88-768:781	(AGly)aadA3:AF047479:1296-2087:792	(AGly)aadA8:AF326210:1-792:792	(AGly)aadA8b:AM040708:1174-1965:792												(Tet)tetM:DQ534550:1451-3370:1920	(Tmt)dfrA1:JQ794607:474:59-532
ECL21464											(Sul)sul3:HQ875016:7396-8187:792	(Tet)tetA:JX424423:94438-95712:1275	(Tet)tetR:HF545434:53576-54226:651				(Tmt)dfrA12:Z21672:310-807:498		(AGly)aadA1:M95287:3320-4111:792	(AGly)aadA1-pm:JQ690540:7968-8798:831	(AGly)aadA11:AJ567827:1-792:792	(AGly)aadA12:AY665771:1-792:792	(AGly)aadA15:DQ393783:1800-2591:792	(AGly)aadA17:FJ460181:774-1565:792	(AGly)aadA21:AY171244:47-838:792	(AGly)aadA22:AM261837:74-865:792	(AGly)aadA23:AJ809407:119-898:781	(AGly)aadA24:HQ123586:88-768:781	(AGly)aadA3:AF047479:1296-2087:792	(AGly)aadA8:AF326210:1-792:792	(AGly)aadA8b:AM040708:1174-1965:792			(AGly)aadA2:X68227:66-945:780												(Phe)cmlA1:M64556:601-1860:1260	(Phe)cmlA10:NG_047649:1-1260:1260	(Phe)cmlA4:NG_047652:101-1360:1260	(Phe)cmlA5:HQ141279:907-2166:1260
ECL21732		(AGly)aph(3'')-Ia:FJ172370:38668-39483:816	(AGly)aph(3')-Ic:KP119857:914-1729:816	(AGly)aph3-Ia:HQ840942:23569-24384:816							(Sul)sul3:HQ875016:7396-8187:792	(Tet)tetA:JX424423:94438-95712:1275	(Tet)tetR:HF545434:53576-54226:651				(Tmt)dfrA12:Z21672:310-807:498		(AGly)aadA1:M95287:3320-4111:792	(AGly)aadA1-pm:JQ690540:7968-8798:831	(AGly)aadA11:AJ567827:1-792:792	(AGly)aadA12:AY665771:1-792:792	(AGly)aadA15:DQ393783:1800-2591:792	(AGly)aadA17:FJ460181:774-1565:792	(AGly)aadA21:AY171244:47-838:792	(AGly)aadA22:AM261837:74-865:792	(AGly)aadA23:AJ809407:119-898:781	(AGly)aadA24:HQ123586:88-768:781	(AGly)aadA3:AF047479:1296-2087:792	(AGly)aadA8:AF326210:1-792:792	(AGly)aadA8b:AM040708:1174-1965:792			(AGly)aadA2:X68227:66-945:780												(Phe)cmlA1:M64556:601-1860:1260	(Phe)cmlA10:NG_047649:1-1260:1260	(Phe)cmlA4:NG_047652:101-1360:1260	(Phe)cmlA5:HQ141279:907-2166:1260
ECL22146	(AGly)aac-IVa:X01385:244-1029:786	(AGly)aph(3'')-Ia:FJ172370:38668-39483:816	(AGly)aph(3')-Ic:KP119857:914-1729:816	(AGly)aph3-Ia:HQ840942:23569-24384:816					(Sul)sul2:EU360945:1617-2432:816		(Sul)sul3:HQ875016:7396-8187:792	(Tet)tetA:JX424423:94438-95712:1275	(Tet)tetR:HF545434:53576-54226:651				(Tmt)dfrA12:Z21672:310-807:498		(AGly)aadA1:M95287:3320-4111:792	(AGly)aadA1-pm:JQ690540:7968-8798:831	(AGly)aadA11:AJ567827:1-792:792	(AGly)aadA12:AY665771:1-792:792	(AGly)aadA15:DQ393783:1800-2591:792	(AGly)aadA17:FJ460181:774-1565:792	(AGly)aadA21:AY171244:47-838:792	(AGly)aadA22:AM261837:74-865:792	(AGly)aadA23:AJ809407:119-898:781	(AGly)aadA24:HQ123586:88-768:781	(AGly)aadA3:AF047479:1296-2087:792	(AGly)aadA8:AF326210:1-792:792	(AGly)aadA8b:AM040708:1174-1965:792			(AGly)aadA2:X68227:66-945:780												(Phe)cmlA1:M64556:601-1860:1260	(Phe)cmlA10:NG_047649:1-1260:1260	(Phe)cmlA4:NG_047652:101-1360:1260	(Phe)cmlA5:HQ141279:907-2166:1260
ECL22172	(AGly)aac-IVa:X01385:244-1029:786	(AGly)aph(3'')-Ia:FJ172370:38668-39483:816	(AGly)aph(3')-Ic:KP119857:914-1729:816	(AGly)aph3-Ia:HQ840942:23569-24384:816	(AGly)aph4-Ia:V01499:231-1256:1026						(Sul)sul3:HQ875016:7396-8187:792	(Tet)tetA:JX424423:94438-95712:1275	(Tet)tetR:HF545434:53576-54226:651				(Tmt)dfrA12:Z21672:310-807:498		(AGly)aadA1:M95287:3320-4111:792	(AGly)aadA1-pm:JQ690540:7968-8798:831	(AGly)aadA11:AJ567827:1-792:792	(AGly)aadA12:AY665771:1-792:792	(AGly)aadA15:DQ393783:1800-2591:792	(AGly)aadA17:FJ460181:774-1565:792	(AGly)aadA21:AY171244:47-838:792	(AGly)aadA22:AM261837:74-865:792	(AGly)aadA23:AJ809407:119-898:781	(AGly)aadA24:HQ123586:88-768:781	(AGly)aadA3:AF047479:1296-2087:792	(AGly)aadA8:AF326210:1-792:792	(AGly)aadA8b:AM040708:1174-1965:792			(AGly)aadA2:X68227:66-945:780												(Phe)cmlA1:M64556:601-1860:1260	(Phe)cmlA10:NG_047649:1-1260:1260	(Phe)cmlA4:NG_047652:101-1360:1260	(Phe)cmlA5:HQ141279:907-2166:1260
ECL22730											(Sul)sul3:HQ875016:7396-8187:792	(Tet)tetA:JX424423:94438-95712:1275	(Tet)tetR:HF545434:53576-54226:651				(Tmt)dfrA12:Z21672:310-807:498		(AGly)aadA1:M95287:3320-4111:792	(AGly)aadA1-pm:JQ690540:7968-8798:831	(AGly)aadA11:AJ567827:1-792:792	(AGly)aadA12:AY665771:1-792:792	(AGly)aadA15:DQ393783:1800-2591:792	(AGly)aadA17:FJ460181:774-1565:792	(AGly)aadA21:AY171244:47-838:792	(AGly)aadA22:AM261837:74-865:792	(AGly)aadA23:AJ809407:119-898:781	(AGly)aadA24:HQ123586:88-768:781	(AGly)aadA3:AF047479:1296-2087:792	(AGly)aadA8:AF326210:1-792:792	(AGly)aadA8b:AM040708:1174-1965:792			(AGly)aadA2:X68227:66-945:780												(Phe)cmlA1:M64556:601-1860:1260	(Phe)cmlA10:NG_047649:1-1260:1260	(Phe)cmlA4:NG_047652:101-1360:1260	(Phe)cmlA5:HQ141279:907-2166:1260
ECL22749									(Sul)sul2:EU360945:1617-2432:816		(Sul)sul3:HQ875016:7396-8187:792	(Tet)tetA:JX424423:94438-95712:1275	(Tet)tetR:HF545434:53576-54226:651				(Tmt)dfrA12:Z21672:310-807:498		(AGly)aadA1:M95287:3320-4111:792	(AGly)aadA1-pm:JQ690540:7968-8798:831	(AGly)aadA11:AJ567827:1-792:792	(AGly)aadA12:AY665771:1-792:792	(AGly)aadA15:DQ393783:1800-2591:792	(AGly)aadA17:FJ460181:774-1565:792	(AGly)aadA21:AY171244:47-838:792	(AGly)aadA22:AM261837:74-865:792	(AGly)aadA23:AJ809407:119-898:781	(AGly)aadA24:HQ123586:88-768:781	(AGly)aadA3:AF047479:1296-2087:792	(AGly)aadA8:AF326210:1-792:792	(AGly)aadA8b:AM040708:1174-1965:792			(AGly)aadA2:X68227:66-945:780												(Phe)cmlA1:M64556:601-1860:1260	(Phe)cmlA10:NG_047649:1-1260:1260	(Phe)cmlA4:NG_047652:101-1360:1260	(Phe)cmlA5:HQ141279:907-2166:1260
ECL22882		(AGly)aph(3'')-Ia:FJ172370:38668-39483:816	(AGly)aph(3')-Ic:KP119857:914-1729:816	(AGly)aph3-Ia:HQ840942:23569-24384:816							(Sul)sul3:HQ875016:7396-8187:792	(Tet)tetA:JX424423:94438-95712:1275	(Tet)tetR:HF545434:53576-54226:651				(Tmt)dfrA12:Z21672:310-807:498		(AGly)aadA1:M95287:3320-4111:792	(AGly)aadA1-pm:JQ690540:7968-8798:831	(AGly)aadA11:AJ567827:1-792:792	(AGly)aadA12:AY665771:1-792:792	(AGly)aadA15:DQ393783:1800-2591:792	(AGly)aadA17:FJ460181:774-1565:792	(AGly)aadA21:AY171244:47-838:792	(AGly)aadA22:AM261837:74-865:792	(AGly)aadA23:AJ809407:119-898:781	(AGly)aadA24:HQ123586:88-768:781	(AGly)aadA3:AF047479:1296-2087:792	(AGly)aadA8:AF326210:1-792:792	(AGly)aadA8b:AM040708:1174-1965:792			(AGly)aadA2:X68227:66-945:780												(Phe)cmlA1:M64556:601-1860:1260	(Phe)cmlA10:NG_047649:1-1260:1260	(Phe)cmlA4:NG_047652:101-1360:1260	(Phe)cmlA5:HQ141279:907-2166:1260
ECL00103										(Tet)tetB:AB089594:1-1206:1206						(Sul)sul1:AF071413:6700-7539:840					(AGly)aadA11:AJ567827:1-792:792							(AGly)aadA24:HQ123586:88-768:781
ECL01302									(Sul)sul2:EU360945:1617-2432:816					(MLS)mph(A):DQ445270:1626-2531:1230		(Sul)sul1:AF071413:6700-7539:840	(Tmt)dfrA12:Z21672:310-807:498				(AGly)aadA11:AJ567827:1-792:792	(AGly)aadA12:AY665771:1-792:792	(AGly)aadA15:DQ393783:1800-2591:792	(AGly)aadA17:FJ460181:774-1565:792	(AGly)aadA21:AY171244:47-838:792	(AGly)aadA22:AM261837:74-865:792	(AGly)aadA23:AJ809407:119-898:781		(AGly)aadA3:AF047479:1296-2087:792	(AGly)aadA8:AF326210:1-792:792	(AGly)aadA8b:AM040708:1174-1965:792			(AGly)aadA2:X68227:66-945:780
ECL01669										(Tet)tetB:AB089594:1-1206:1206						(Sul)sul1:AF071413:6700-7539:840					(AGly)aadA11:AJ567827:1-792:792							(AGly)aadA24:HQ123586:88-768:781
ECL02602
ECL02964
ECL03391												(Tet)tetA:JX424423:94438-95712:1275	(Tet)tetR:HF545434:53576-54226:651			(Sul)sul1:AF071413:6700-7539:840			(AGly)aadA1:M95287:3320-4111:792	(AGly)aadA1-pm:JQ690540:7968-8798:831	(AGly)aadA11:AJ567827:1-792:792	(AGly)aadA12:AY665771:1-792:792	(AGly)aadA15:DQ393783:1800-2591:792	(AGly)aadA17:FJ460181:774-1565:792	(AGly)aadA21:AY171244:47-838:792	(AGly)aadA22:AM261837:74-865:792	(AGly)aadA23:AJ809407:119-898:781	(AGly)aadA24:HQ123586:88-768:781	(AGly)aadA3:AF047479:1296-2087:792	(AGly)aadA8:AF326210:1-792:792	(AGly)aadA8b:AM040708:1174-1965:792
ECL04323
ECL04937										(Tet)tetB:AB089594:1-1206:1206						(Sul)sul1:AF071413:6700-7539:840					(AGly)aadA11:AJ567827:1-792:792							(AGly)aadA24:HQ123586:88-768:781
ECL05543																(Sul)sul1:AF071413:6700-7539:840					(AGly)aadA11:AJ567827:1-792:792							(AGly)aadA24:HQ123586:88-768:781
ECL06007
ECL07310
ECL08786																			(AGly)aadA1:M95287:3320-4111:792	(AGly)aadA1-pm:JQ690540:7968-8798:831	(AGly)aadA11:AJ567827:1-792:792	(AGly)aadA12:AY665771:1-792:792	(AGly)aadA15:DQ393783:1800-2591:792	(AGly)aadA17:FJ460181:774-1565:792	(AGly)aadA21:AY171244:47-838:792	(AGly)aadA22:AM261837:74-865:792	(AGly)aadA23:AJ809407:119-898:781	(AGly)aadA24:HQ123586:88-768:781	(AGly)aadA3:AF047479:1296-2087:792	(AGly)aadA8:AF326210:1-792:792	(AGly)aadA8b:AM040708:1174-1965:792													(Tmt)dfrA1:JQ794607:474:59-532
ECL05380		(AGly)aph(3'')-Ia:FJ172370:38668-39483:816	(AGly)aph(3')-Ic:KP119857:914-1729:816	(AGly)aph3-Ia:HQ840942:23569-24384:816		(AGly)strA:AB366441:22458-23261:804	(AGly)strB:FJ474091:264-1100:837			(Tet)tetB:AB089594:1-1206:1206						(Sul)sul1:AF071413:6700-7539:840					(AGly)aadA11:AJ567827:1-792:792							(AGly)aadA24:HQ123586:88-768:781
ECL05958		(AGly)aph(3'')-Ia:FJ172370:38668-39483:816	(AGly)aph(3')-Ic:KP119857:914-1729:816	(AGly)aph3-Ia:HQ840942:23569-24384:816		(AGly)strA:AB366441:22458-23261:804	(AGly)strB:FJ474091:264-1100:837	(Phe)catA1:V00622:244-903:660		(Tet)tetB:AB089594:1-1206:1206						(Sul)sul1:AF071413:6700-7539:840			(AGly)aadA1:M95287:3320-4111:792	(AGly)aadA1-pm:JQ690540:7968-8798:831	(AGly)aadA11:AJ567827:1-792:792	(AGly)aadA12:AY665771:1-792:792	(AGly)aadA15:DQ393783:1800-2591:792	(AGly)aadA17:FJ460181:774-1565:792	(AGly)aadA21:AY171244:47-838:792	(AGly)aadA22:AM261837:74-865:792	(AGly)aadA23:AJ809407:119-898:781	(AGly)aadA24:HQ123586:88-768:781	(AGly)aadA3:AF047479:1296-2087:792	(AGly)aadA8:AF326210:1-792:792	(AGly)aadA8b:AM040708:1174-1965:792													(Tmt)dfrA1:JQ794607:474:59-532
ECL08334		(AGly)aph(3'')-Ia:FJ172370:38668-39483:816	(AGly)aph(3')-Ic:KP119857:914-1729:816	(AGly)aph3-Ia:HQ840942:23569-24384:816				(Phe)catA1:V00622:244-903:660		(Tet)tetB:AB089594:1-1206:1206						(Sul)sul1:AF071413:6700-7539:840			(AGly)aadA1:M95287:3320-4111:792	(AGly)aadA1-pm:JQ690540:7968-8798:831	(AGly)aadA11:AJ567827:1-792:792	(AGly)aadA12:AY665771:1-792:792	(AGly)aadA15:DQ393783:1800-2591:792	(AGly)aadA17:FJ460181:774-1565:792	(AGly)aadA21:AY171244:47-838:792	(AGly)aadA22:AM261837:74-865:792	(AGly)aadA23:AJ809407:119-898:781	(AGly)aadA24:HQ123586:88-768:781	(AGly)aadA3:AF047479:1296-2087:792	(AGly)aadA8:AF326210:1-792:792	(AGly)aadA8b:AM040708:1174-1965:792			(AGly)aadA2:X68227:66-945:780
ECL17896	(AGly)aac-IVa:X01385:244-1029:786	(AGly)aph(3'')-Ia:FJ172370:38668-39483:816	(AGly)aph(3')-Ic:KP119857:914-1729:816	(AGly)aph3-Ia:HQ840942:23569-24384:816	(AGly)aph4-Ia:V01499:231-1256:1026	(AGly)strA:AB366441:22458-23261:804	(AGly)strB:FJ474091:264-1100:837			(Tet)tetB:AB089594:1-1206:1206							(Tmt)dfrA12:Z21672:310-807:498		(AGly)aadA1:M95287:3320-4111:792	(AGly)aadA1-pm:JQ690540:7968-8798:831	(AGly)aadA11:AJ567827:1-792:792	(AGly)aadA12:AY665771:1-792:792	(AGly)aadA15:DQ393783:1800-2591:792	(AGly)aadA17:FJ460181:774-1565:792	(AGly)aadA21:AY171244:47-838:792	(AGly)aadA22:AM261837:74-865:792	(AGly)aadA23:AJ809407:119-898:781	(AGly)aadA24:HQ123586:88-768:781	(AGly)aadA3:AF047479:1296-2087:792	(AGly)aadA8:AF326210:1-792:792	(AGly)aadA8b:AM040708:1174-1965:792			(AGly)aadA2:X68227:66-945:780
ECL19148										(Tet)tetB:AB089594:1-1206:1206
ECL19153										(Tet)tetB:AB089594:1-1206:1206
ECL19788										(Tet)tetB:AB089594:1-1206:1206									(AGly)aadA1:M95287:3320-4111:792	(AGly)aadA1-pm:JQ690540:7968-8798:831	(AGly)aadA11:AJ567827:1-792:792	(AGly)aadA12:AY665771:1-792:792	(AGly)aadA15:DQ393783:1800-2591:792	(AGly)aadA17:FJ460181:774-1565:792	(AGly)aadA21:AY171244:47-838:792	(AGly)aadA22:AM261837:74-865:792	(AGly)aadA23:AJ809407:119-898:781	(AGly)aadA24:HQ123586:88-768:781	(AGly)aadA3:AF047479:1296-2087:792	(AGly)aadA8:AF326210:1-792:792	(AGly)aadA8b:AM040708:1174-1965:792													(Tmt)dfrA1:JQ794607:474:59-532
ECL20223									(Sul)sul2:EU360945:1617-2432:816	(Tet)tetB:AB089594:1-1206:1206									(AGly)aadA1:M95287:3320-4111:792		(AGly)aadA11:AJ567827:1-792:792	(AGly)aadA12:AY665771:1-792:792	(AGly)aadA15:DQ393783:1800-2591:792	(AGly)aadA17:FJ460181:774-1565:792	(AGly)aadA21:AY171244:47-838:792	(AGly)aadA22:AM261837:74-865:792	(AGly)aadA23:AJ809407:119-898:781	(AGly)aadA24:HQ123586:88-768:781	(AGly)aadA3:AF047479:1296-2087:792	(AGly)aadA8:AF326210:1-792:792	(AGly)aadA8b:AM040708:1174-1965:792			(AGly)aadA2:X68227:66-945:780									(Tet)tetM:DQ534550:1451-3370:1920	(Tmt)dfrA1:JQ794607:474:59-532
ECL20462										(Tet)tetB:AB089594:1-1206:1206
ECL22774										(Tet)tetB:AB089594:1-1206:1206	(Sul)sul3:HQ875016:7396-8187:792						(Tmt)dfrA12:Z21672:310-807:498		(AGly)aadA1:M95287:3320-4111:792	(AGly)aadA1-pm:JQ690540:7968-8798:831	(AGly)aadA11:AJ567827:1-792:792	(AGly)aadA12:AY665771:1-792:792	(AGly)aadA15:DQ393783:1800-2591:792	(AGly)aadA17:FJ460181:774-1565:792	(AGly)aadA21:AY171244:47-838:792	(AGly)aadA22:AM261837:74-865:792	(AGly)aadA23:AJ809407:119-898:781	(AGly)aadA24:HQ123586:88-768:781	(AGly)aadA3:AF047479:1296-2087:792	(AGly)aadA8:AF326210:1-792:792	(AGly)aadA8b:AM040708:1174-1965:792			(AGly)aadA2:X68227:66-945:780												(Phe)cmlA1:M64556:601-1860:1260	(Phe)cmlA10:NG_047649:1-1260:1260	(Phe)cmlA4:NG_047652:101-1360:1260	(Phe)cmlA5:HQ141279:907-2166:1260
ECL14672
ECL21170		(AGly)aph(3'')-Ia:FJ172370:38668-39483:816	(AGly)aph(3')-Ic:KP119857:914-1729:816	(AGly)aph3-Ia:HQ840942:23569-24384:816						(Tet)tetB:AB089594:1-1206:1206	(Sul)sul3:HQ875016:7396-8187:792								(AGly)aadA1:M95287:3320-4111:792	(AGly)aadA1-pm:JQ690540:7968-8798:831	(AGly)aadA11:AJ567827:1-792:792	(AGly)aadA12:AY665771:1-792:792	(AGly)aadA15:DQ393783:1800-2591:792	(AGly)aadA17:FJ460181:774-1565:792	(AGly)aadA21:AY171244:47-838:792	(AGly)aadA22:AM261837:74-865:792	(AGly)aadA23:AJ809407:119-898:781	(AGly)aadA24:HQ123586:88-768:781	(AGly)aadA3:AF047479:1296-2087:792	(AGly)aadA8:AF326210:1-792:792	(AGly)aadA8b:AM040708:1174-1965:792															(Phe)cmlA1:M64556:601-1860:1260	(Phe)cmlA10:NG_047649:1-1260:1260	(Phe)cmlA4:NG_047652:101-1360:1260	(Phe)cmlA5:HQ141279:907-2166:1260
ECL01947										(Tet)tetB:AB089594:1-1206:1206						(Sul)sul1:AF071413:6700-7539:840					(AGly)aadA11:AJ567827:1-792:792							(AGly)aadA24:HQ123586:88-768:781
ECL20395									(Sul)sul2:EU360945:1617-2432:816	(Tet)tetB:AB089594:1-1206:1206
ECL19146												(Tet)tetA:JX424423:94438-95712:1275	(Tet)tetR:HF545434:53576-54226:651
[truncated: 36 more columns]

## Sheet: qnr
ID_souche	lignee_clonale_arbre	_Flq_qnrB1	_Flq_qnrB10	_Flq_qnrB13	_Flq_qnrB14	_Flq_qnrB15	_Flq_qnrB17	_Flq_qnrB18	_Flq_qnrB19	_Flq_qnrB2	_Flq_qnrB20	_Flq_qnrB23	_Flq_qnrB24	_Flq_qnrB26	_Flq_qnrB29	_Flq_qnrB3	_Flq_qnrB30	_Flq_qnrB32	_Flq_qnrB36	_Flq_qnrB40	_Flq_qnrB41	_Flq_qnrB42	_Flq_qnrB43	_Flq_qnrB44	_Flq_qnrB45	_Flq_qnrB46	_Flq_qnrB47	_Flq_qnrB48	_Flq_qnrB49	_Flq_qnrB5	_Flq_qnrB6	_Flq_qnrB7	_Flq_qnrB72
ECL00103	D
ECL00351	A
ECL00652	A
ECL01302	D
ECL01669	D
ECL01947	NA
ECL02602	D
ECL02964	D
ECL03391	D
ECL04323	D
ECL04937	D
ECL05380	E
ECL05543	D
ECL05958	E
ECL06007	D
ECL07310	D
ECL07805	A
ECL08334	E
ECL08786	D
ECL09114	A
ECL09646	A
ECL10170	A
ECL10647	A
ECL11171	A
ECL11324	A
ECL13086	A
ECL13345	A
ECL14048	A
ECL14672	F
ECL16273	B
ECL17377	B
ECL17896	E
ECL18172	A
ECL18573	A
ECL18728	A
ECL19125	A
ECL19146
ECL19148	E
ECL19153	E
ECL19159	A
ECL19187	A
ECL19345	A
ECL19373	A
ECL19390	A
ECL19403	A
ECL19414	A
ECL19427	A
ECL19508	A
ECL19517	A
ECL19555	A
ECL19602	B
ECL19641	A
ECL19664	A
ECL19668	A
ECL19751	A
ECL19755	A
ECL19763	A
ECL19788	E
ECL19820	B
ECL19885	A
ECL19889	A
ECL19894	A
ECL19901	A
ECL19902	A
ECL19916	A
ECL19931	B
ECL19939	A
ECL19990	B
ECL20013	A
ECL20014	A
ECL20015	A
ECL20018	A
ECL20209	A
ECL20212	A
ECL20223	E
ECL20239	A
ECL20256	A
ECL20278	A
ECL20290	A
ECL20308	A
ECL20389	A
ECL20395	NA
ECL20404	A
ECL20408	A
ECL20435	A
ECL20436	A
ECL20462	E
ECL20544	A
ECL20550	A
ECL20566	A
ECL20622	A
ECL20627	A
ECL20721	A
ECL20725	A
ECL20769	A
ECL20776	A
ECL20778	A
ECL20797	B
ECL20814	A
ECL20836	A
ECL20846	A
ECL20850	A
ECL20887	A
ECL20896	A
ECL20906	A
ECL20911	A
ECL20918	A
ECL20924	A
ECL21170	F
ECL21259	A
ECL21274	A
ECL21290	A
ECL21405	A
ECL21412	A
ECL21415	A
ECL21464	C
ECL21483	A
ECL21505	A
ECL21512	A
ECL21518	A
ECL21541	A
ECL21542	A
ECL21551	A
ECL21584	A
ECL21628	A
ECL21652	A
ECL21655	A
ECL21657	A
ECL21676	A
ECL21680	A
ECL21730	A
ECL21732	C
ECL21756	B
ECL21837	A
ECL21975	A
ECL21979	A
ECL22052	A
ECL22093	A
ECL22099	A
ECL22128	A
ECL22134	A
ECL22146	C
ECL22172	C	(Flq)qnrB1:DQ351241:1-681:681	(Flq)qnrB10:DQ631414:1-681:681	(Flq)qnrB13:EU273756:1-681:681	(Flq)qnrB14:EU273757:1-681:681	(Flq)qnrB15:EU302865:1-681:681	(Flq)qnrB17:AM919398:1-681:681	(Flq)qnrB18:AM919399:1-681:681	(Flq)qnrB19:EU432277:1-645:645	(Flq)qnrB2:DQ351242:1-645:645	(Flq)qnrB20:AB379831:1-681:681	(Flq)qnrB23:FJ981622:1-681:681	(Flq)qnrB24:HM192542:1-681:681	(Flq)qnrB26:HQ386846:1-681:681	(Flq)qnrB29:HM439649:1-681:681	(Flq)qnrB3:DQ303920:1-681:681	(Flq)qnrB30:HM439650:1-681:681	(Flq)qnrB32:JN173054:1-681:681	(Flq)qnrB36:JN173058:37-681:645	(Flq)qnrB40:JN166689:1-660:660	(Flq)qnrB41:JN166690:1-681:681	(Flq)qnrB42:JN680743:1-645:645	(Flq)qnrB43:JQ349151:1-680:680	(Flq)qnrB44:JQ349153:1-680:680	(Flq)qnrB45:JQ349152:1-680:680	(Flq)qnrB46:JQ349154:1-680:680	(Flq)qnrB47:JQ349155:1-680:680	(Flq)qnrB48:JQ762640:37-681:645	(Flq)qnrB49:JQ582718:1-681:681	(Flq)qnrB5:DQ303919:1-681:681	(Flq)qnrB6:EF520349:1-681:681	(Flq)qnrB7:EU043311:1-645:645	(Flq)qnrB72:KC741443:1-645:645
ECL22215	A
ECL22265	A
ECL22274	A
ECL22293	A
ECL22298	A
ECL22341	B
ECL22433	A
ECL22438	A
ECL22447	A
ECL22487	A
ECL22491	A
ECL22503	A
ECL22505	A
ECL22529	B
ECL22536	A
ECL22553	A
ECL22653	B
ECL22730	C
ECL22741	A
ECL22749	C
ECL22774	E
ECL22800	A
ECL22867	A
ECL22868	A
ECL22882	C
ECL22887	A
ECL22967	A
ECL23013	A
ECL23067	A
ECL85531	A
SRR10541867	A
SRR11045320	A
SRR11045323	A
SRR11045324	A
SRR11046294	A
SRR11046297	A
SRR11046300	A
SRR11046301	A
SRR11046303	A
SRR11046874	A
SRR11046875	A
SRR11046877	A
SRR11046878	A
SRR11047446	A
SRR11048585	A
SRR11048588	A
SRR11048592	A
SRR11048595	A
SRR11048596	A
SRR11074150	A
SRR11074152	A
SRR11074153	A
SRR11074174	A
SRR11074676	A
SRR11074677	A
SRR11074679	A
SRR11074680	A
SRR11074681	A
SRR11074684	A
SRR11074686	A
SRR11074688	A
SRR11074697	A
SRR11074704	A
SRR11074708	A
SRR11074710	A
SRR11074716	A
SRR6121969	A
SRR7213569	A
SRR7213570	A
SRR7213571	A
SRR7213572	A
SRR7213573	A
SRR7213575	A
SRR7213576	A
SRR7213578	A
SRR7213579	A
SRR7213581	A
SRR7213583	A
SRR7213588	A
SRR7213590	A
SRR7213593	A
SRR7213595	A
SRR7213596	A
SRR7213597	A
SRR7213598	A
SRR7213599	A
SRR7213600	A
SRR7213602	A
SRR7213603	A
SRR7213606	A
SRR7213607	A
SRR7213608	A
SRR7213623	A
SRR7213658	A
SRR7213659	A
SRR7213660	A
SRR8157048	A
SRR8901382	A
SRR8901386	A
SRR8901388	A
SRR8901392	A
SRR8901396	A
SRR8901397	A
SRR8901398	A
SRR8901402	A
SRR8901404	A	(Flq)qnrB1:DQ351241:1-681:681	(Flq)qnrB10:DQ631414:1-681:681	(Flq)qnrB13:EU273756:1-681:681	(Flq)qnrB14:EU273757:1-681:681	(Flq)qnrB15:EU302865:1-681:681	(Flq)qnrB17:AM919398:1-681:681	(Flq)qnrB18:AM919399:1-681:681	(Flq)qnrB19:EU432277:1-645:645	(Flq)qnrB2:DQ351242:1-645:645	(Flq)qnrB20:AB379831:1-681:681	(Flq)qnrB23:FJ981622:1-681:681	(Flq)qnrB24:HM192542:1-681:681	(Flq)qnrB26:HQ386846:1-681:681	(Flq)qnrB29:HM439649:1-681:681	(Flq)qnrB3:DQ303920:1-681:681	(Flq)qnrB30:HM439650:1-681:681	(Flq)qnrB32:JN173054:1-681:681	(Flq)qnrB36:JN173058:37-681:645	(Flq)qnrB40:JN166689:1-660:660	(Flq)qnrB41:JN166690:1-681:681	(Flq)qnrB42:JN680743:1-645:645	(Flq)qnrB43:JQ349151:1-680:680	(Flq)qnrB44:JQ349153:1-680:680	(Flq)qnrB45:JQ349152:1-680:680	(Flq)qnrB46:JQ349154:1-680:680	(Flq)qnrB47:JQ349155:1-680:680	(Flq)qnrB48:JQ762640:37-681:645	(Flq)qnrB49:JQ582718:1-681:681	(Flq)qnrB5:DQ303919:1-681:681	(Flq)qnrB6:EF520349:1-681:681	(Flq)qnrB7:EU043311:1-645:645	(Flq)qnrB72:KC741443:1-645:645
SRR8901430	A
SRR8901439	A
SRR8901452	A
SRR8989463	A
SRR9913963	A
SRR9914120	A

## Sheet: col
ID_souche	lignee_clonale_arbre	_Col_mcr_1_1	_Col_mcr_1_10	_Col_mcr_1_11	_Col_mcr_1_12	_Col_mcr_1_13	_Col_mcr_1_2	_Col_mcr_1_3	_Col_mcr_1_4	_Col_mcr_1_5	_Col_mcr_1_6	_Col_mcr_1_7	_Col_mcr_1_8	_Col_mcr_1_9
ECL00103	D
ECL00351	A
ECL00652	A
ECL01302	D
ECL01669	D
ECL01947	NA
ECL02602	D
ECL02964	D
ECL03391	D
ECL04323	D
ECL04937	D
ECL05380	E
ECL05543	D
ECL05958	E
ECL06007	D
ECL07310	D
ECL07805	A
ECL08334	E
ECL08786	D
ECL09114	A
ECL09646	A
ECL10170	A
ECL10647	A
ECL11171	A
ECL11324	A
ECL13086	A
ECL13345	A
ECL14048	A
ECL14672	F
ECL16273	B
ECL17377	B
ECL17896	E
ECL18172	A
ECL18573	A
ECL18728	A
ECL19125	A
ECL19146
ECL19148	E
ECL19153	E
ECL19159	A
ECL19187	A
ECL19345	A
ECL19373	A
ECL19390	A
ECL19403	A
ECL19414	A
ECL19427	A
ECL19508	A
ECL19517	A
ECL19555	A
ECL19602	B
ECL19641	A
ECL19664	A
ECL19668	A
ECL19751	A
ECL19755	A
ECL19763	A
ECL19788	E
ECL19820	B
ECL19885	A
ECL19889	A
ECL19894	A
ECL19901	A
ECL19902	A
ECL19916	A
ECL19931	B
ECL19939	A
ECL19990	B
ECL20013	A
ECL20014	A
ECL20015	A
ECL20018	A
ECL20209	A
ECL20212	A
ECL20223	E
ECL20239	A
ECL20256	A
ECL20278	A
ECL20290	A
ECL20308	A
ECL20389	A
ECL20395	NA
ECL20404	A
ECL20408	A
ECL20435	A
ECL20436	A
ECL20462	E
ECL20544	A
ECL20550	A
ECL20566	A
ECL20622	A
ECL20627	A
ECL20721	A
ECL20725	A
ECL20769	A
ECL20776	A
ECL20778	A
ECL20797	B
ECL20814	A
ECL20836	A
ECL20846	A
ECL20850	A
ECL20887	A
ECL20896	A
ECL20906	A
ECL20911	A
ECL20918	A
ECL20924	A
ECL21170	F
ECL21259	A
ECL21274	A
ECL21290	A
ECL21405	A
ECL21412	A
ECL21415	A
ECL21464	C
ECL21483	A
ECL21505	A
ECL21512	A
ECL21518	A
ECL21541	A
ECL21542	A
ECL21551	A
ECL21584	A
ECL21628	A
ECL21652	A
ECL21655	A
ECL21657	A
ECL21676	A
ECL21680	A
ECL21730	A
ECL21732	C
ECL21756	B
ECL21837	A
ECL21975	A
ECL21979	A
ECL22052	A
ECL22093	A
ECL22099	A
ECL22128	A
ECL22134	A
ECL22146	C
ECL22172	C
ECL22215	A
ECL22265	A
ECL22274	A
ECL22293	A
ECL22298	A
ECL22341	B
ECL22433	A
ECL22438	A
ECL22447	A
ECL22487	A
ECL22491	A
ECL22503	A
ECL22505	A
ECL22529	B
ECL22536	A
ECL22553	A
ECL22653	B
ECL22730	C
ECL22741	A
ECL22749	C
ECL22774	E
ECL22800	A
ECL22867	A
ECL22868	A
ECL22882	C
ECL22887	A
ECL22967	A
ECL23013	A
ECL23067	A
ECL85531	A
SRR10541867	A
SRR11045320	A
SRR11045323	A
SRR11045324	A
SRR11046294	A
SRR11046297	A
SRR11046300	A
SRR11046301	A
SRR11046303	A
SRR11046874	A
SRR11046875	A
SRR11046877	A
SRR11046878	A
SRR11047446	A
SRR11048585	A
SRR11048588	A
SRR11048592	A
SRR11048595	A
SRR11048596	A
SRR11074150	A
SRR11074152	A
SRR11074153	A
SRR11074174	A
SRR11074676	A
SRR11074677	A
SRR11074679	A
SRR11074680	A
SRR11074681	A
SRR11074684	A
SRR11074686	A
SRR11074688	A
SRR11074697	A
SRR11074704	A
SRR11074708	A
SRR11074710	A
SRR11074716	A
SRR6121969	A
SRR7213569	A
SRR7213570	A
SRR7213571	A
SRR7213572	A
SRR7213573	A
SRR7213575	A
SRR7213576	A
SRR7213578	A
SRR7213579	A
SRR7213581	A
SRR7213583	A
SRR7213588	A
SRR7213590	A
SRR7213593	A
SRR7213595	A
SRR7213596	A
SRR7213597	A
SRR7213598	A
SRR7213599	A
SRR7213600	A
SRR7213602	A
SRR7213603	A
SRR7213606	A
SRR7213607	A
SRR7213608	A
SRR7213623	A
SRR7213658	A
SRR7213659	A
SRR7213660	A
SRR8157048	A	(Col)mcr-1.1:KP347127:22413-24038:1626	(Col)mcr-1.10:NG_055583:1-1626:1626	(Col)mcr-1.11:KY853650:51584-53212:1629	(Col)mcr-1.12:LC337668:1-1626:1626	(Col)mcr-1.13:MG384739:1-1626:1626	(Col)mcr-1.2:KX236309:3137-4762:1626	(Col)mcr-1.3:KU934208:18648-20273:1626	(Col)mcr-1.4:KY041856:1-1626:1626	(Col)mcr-1.5:KY283125:1-1626:1626	(Col)mcr-1.6:KY352406:4093-5718:1626	(Col)mcr-1.7:KY829117:12188-13813:1626	(Col)mcr-1.8:KY683842:1-1626:1626	(Col)mcr-1.9:KY964067:27184-28809:1626
SRR8901382	A
SRR8901386	A
SRR8901388	A
SRR8901392	A
SRR8901396	A
SRR8901397	A
SRR8901398	A
SRR8901402	A
SRR8901404	A
SRR8901430	A
SRR8901439	A
SRR8901452	A
SRR8989463	A
SRR9913963	A
SRR9914120	A
