# Supplementary material for: High Risk Clone: A Proposal of Criteria Adapted to the One Health Context with Application to Enterotoxigenic Escherichia coli in the Pig Population
Source: Antibiotics (Basel). 2021 Feb 28;10(3):244. doi: 10.3390/antibiotics10030244 (PMC8000703; doi:10.3390/antibiotics10030244)
Supplement: Supplementary file 1 [file antibiotics-10-00244-s001.zip › TableS7_Plasmidfinderresults.xlsx]

## Sheet: pf_total_2
ID_souche	Col_pHAD28_	FIA_pBK30683_	IncB_O_K_Z	IncFIA_HI1_	IncFIB_AP001918_	IncFIC_FII_	IncFII	IncFII_29_	IncFII_pCoo_	IncFII_pSE11_	IncHI1A	IncHI1B_R27_	IncHI1B_pNDM_CIT_	IncI_Gamma_	IncI1_I_Gamma_	IncI2	IncI2_Delta_	IncQ1	IncFIB_K_	IncFIB_K__pCAV1099_114_	IncN	IncR	IncFII_pRSB107_	IncFII_pSFO_	IncX1	Col156	IncA	IncC	Col_MG828_	Col440I	IncFIA	IncHI2	IncHI2A	ColRNAI	IncX3	IncFII_pHN7A8_	IncFIB_H89_PhagePlasmid_	Col440II	IncX4	IncFII_pAMA1167_NDM_5_	Col8282	IncY	p0111	pKPC_CAV1321	ColpVC	IncFIB_S_	IncFIB_pB171_	IncFIB_pLF82_PhagePlasmid_	clonal_lineage
ECL19664	Col(pHAD28)_1__KU674895				IncFIB(AP001918)_1__AP001918	IncFIC(FII)_1__AP001918	IncFII_1__AY458016	IncFII(29)_1__CP003035	IncFII(pCoo)_1__CR942285	IncFII(pSE11)_1__AP009242				IncI(Gamma)_1__AP011954	IncI1-I(Gamma)_1__AP005147				IncFIB(K)_1__JN233704	IncFIB(K)(pCAV1099-114)_1__CP011596																		Col440II_1__CP023921											A
ECL19668	Col(pHAD28)_1__KU674895				IncFIB(AP001918)_1__AP001918	IncFIC(FII)_1__AP001918	IncFII_1__AY458016	IncFII(29)_1__CP003035	IncFII(pCoo)_1__CR942285	IncFII(pSE11)_1__AP009242				IncI(Gamma)_1__AP011954	IncI1-I(Gamma)_1__AP005147				IncFIB(K)_1__JN233704	IncFIB(K)(pCAV1099-114)_1__CP011596																		Col440II_1__CP023921											A
ECL19916	Col(pHAD28)_1__KU674895				IncFIB(AP001918)_1__AP001918	IncFIC(FII)_1__AP001918	IncFII_1__AY458016	IncFII(29)_1__CP003035	IncFII(pCoo)_1__CR942285	IncFII(pSE11)_1__AP009242				IncI(Gamma)_1__AP011954	IncI1-I(Gamma)_1__AP005147				IncFIB(K)_1__JN233704	IncFIB(K)(pCAV1099-114)_1__CP011596																		Col440II_1__CP023921											A
ECL20013	Col(pHAD28)_1__KU674895				IncFIB(AP001918)_1__AP001918	IncFIC(FII)_1__AP001918	IncFII_1__AY458016	IncFII(29)_1__CP003035	IncFII(pCoo)_1__CR942285	IncFII(pSE11)_1__AP009242				IncI(Gamma)_1__AP011954	IncI1-I(Gamma)_1__AP005147				IncFIB(K)_1__JN233704	IncFIB(K)(pCAV1099-114)_1__CP011596																													A
ECL20014	Col(pHAD28)_1__KU674895				IncFIB(AP001918)_1__AP001918		IncFII_1__AY458016	IncFII(29)_1__CP003035	IncFII(pCoo)_1__CR942285	IncFII(pSE11)_1__AP009242									IncFIB(K)_1__JN233704	IncFIB(K)(pCAV1099-114)_1__CP011596																													A
ECL20015	Col(pHAD28)_1__KU674895				IncFIB(AP001918)_1__AP001918	IncFIC(FII)_1__AP001918	IncFII_1__AY458016	IncFII(29)_1__CP003035	IncFII(pCoo)_1__CR942285	IncFII(pSE11)_1__AP009242				IncI(Gamma)_1__AP011954	IncI1-I(Gamma)_1__AP005147				IncFIB(K)_1__JN233704	IncFIB(K)(pCAV1099-114)_1__CP011596																													A
ECL20018	Col(pHAD28)_1__KU674895				IncFIB(AP001918)_1__AP001918	IncFIC(FII)_1__AP001918	IncFII_1__AY458016	IncFII(29)_1__CP003035	IncFII(pCoo)_1__CR942285	IncFII(pSE11)_1__AP009242				IncI(Gamma)_1__AP011954	IncI1-I(Gamma)_1__AP005147				IncFIB(K)_1__JN233704	IncFIB(K)(pCAV1099-114)_1__CP011596																													A
ECL20209	Col(pHAD28)_1__KU674895				IncFIB(AP001918)_1__AP001918	IncFIC(FII)_1__AP001918	IncFII_1__AY458016	IncFII(29)_1__CP003035	IncFII(pCoo)_1__CR942285	IncFII(pSE11)_1__AP009242				IncI(Gamma)_1__AP011954	IncI1-I(Gamma)_1__AP005147				IncFIB(K)_1__JN233704	IncFIB(K)(pCAV1099-114)_1__CP011596									Col(MG828)_1__NC_008486																				A
ECL20212	Col(pHAD28)_1__KU674895				IncFIB(AP001918)_1__AP001918	IncFIC(FII)_1__AP001918	IncFII_1__AY458016	IncFII(29)_1__CP003035	IncFII(pCoo)_1__CR942285	IncFII(pSE11)_1__AP009242				IncI(Gamma)_1__AP011954	IncI1-I(Gamma)_1__AP005147				IncFIB(K)_1__JN233704	IncFIB(K)(pCAV1099-114)_1__CP011596																													A
ECL20239	Col(pHAD28)_1__KU674895						IncFII_1__AY458016	IncFII(29)_1__CP003035	IncFII(pCoo)_1__CR942285	IncFII(pSE11)_1__AP009242				IncI(Gamma)_1__AP011954	IncI1-I(Gamma)_1__AP005147				IncFIB(K)_1__JN233704	IncFIB(K)(pCAV1099-114)_1__CP011596																		Col440II_1__CP023921											A
ECL20256	Col(pHAD28)_1__KU674895						IncFII_1__AY458016	IncFII(29)_1__CP003035	IncFII(pCoo)_1__CR942285	IncFII(pSE11)_1__AP009242				IncI(Gamma)_1__AP011954	IncI1-I(Gamma)_1__AP005147				IncFIB(K)_1__JN233704	IncFIB(K)(pCAV1099-114)_1__CP011596																		Col440II_1__CP023921											A
ECL20278	Col(pHAD28)_1__KU674895				IncFIB(AP001918)_1__AP001918	IncFIC(FII)_1__AP001918	IncFII_1__AY458016	IncFII(29)_1__CP003035	IncFII(pCoo)_1__CR942285	IncFII(pSE11)_1__AP009242				IncI(Gamma)_1__AP011954	IncI1-I(Gamma)_1__AP005147				IncFIB(K)_1__JN233704	IncFIB(K)(pCAV1099-114)_1__CP011596									Col(MG828)_1__NC_008486																				A
ECL20290	Col(pHAD28)_1__KU674895					IncFIC(FII)_1__AP001918								IncI(Gamma)_1__AP011954	IncI1-I(Gamma)_1__AP005147				IncFIB(K)_1__JN233704	IncFIB(K)(pCAV1099-114)_1__CP011596									Col(MG828)_1__NC_008486																				A
ECL20389	Col(pHAD28)_1__KU674895						IncFII_1__AY458016	IncFII(29)_1__CP003035	IncFII(pCoo)_1__CR942285	IncFII(pSE11)_1__AP009242				IncI(Gamma)_1__AP011954	IncI1-I(Gamma)_1__AP005147				IncFIB(K)_1__JN233704	IncFIB(K)(pCAV1099-114)_1__CP011596																													A
ECL20404	Col(pHAD28)_1__KU674895						IncFII_1__AY458016	IncFII(29)_1__CP003035	IncFII(pCoo)_1__CR942285	IncFII(pSE11)_1__AP009242				IncI(Gamma)_1__AP011954	IncI1-I(Gamma)_1__AP005147				IncFIB(K)_1__JN233704	IncFIB(K)(pCAV1099-114)_1__CP011596									Col(MG828)_1__NC_008486																				A
ECL20435	Col(pHAD28)_1__KU674895				IncFIB(AP001918)_1__AP001918	IncFIC(FII)_1__AP001918	IncFII_1__AY458016	IncFII(29)_1__CP003035	IncFII(pCoo)_1__CR942285	IncFII(pSE11)_1__AP009242				IncI(Gamma)_1__AP011954	IncI1-I(Gamma)_1__AP005147				IncFIB(K)_1__JN233704	IncFIB(K)(pCAV1099-114)_1__CP011596							IncA_1__FJ705807	IncC_1__JN157804										Col440II_1__CP023921											A
ECL20436	Col(pHAD28)_1__KU674895				IncFIB(AP001918)_1__AP001918	IncFIC(FII)_1__AP001918	IncFII_1__AY458016	IncFII(29)_1__CP003035	IncFII(pCoo)_1__CR942285	IncFII(pSE11)_1__AP009242				IncI(Gamma)_1__AP011954	IncI1-I(Gamma)_1__AP005147				IncFIB(K)_1__JN233704	IncFIB(K)(pCAV1099-114)_1__CP011596							IncA_1__FJ705807	IncC_1__JN157804	Col(MG828)_1__NC_008486																				A
ECL20544	Col(pHAD28)_1__KU674895				IncFIB(AP001918)_1__AP001918	IncFIC(FII)_1__AP001918	IncFII_1__AY458016	IncFII(29)_1__CP003035	IncFII(pCoo)_1__CR942285	IncFII(pSE11)_1__AP009242									IncFIB(K)_1__JN233704	IncFIB(K)(pCAV1099-114)_1__CP011596																													A
ECL20566	Col(pHAD28)_1__KU674895				IncFIB(AP001918)_1__AP001918		IncFII_1__AY458016	IncFII(29)_1__CP003035	IncFII(pCoo)_1__CR942285	IncFII(pSE11)_1__AP009242				IncI(Gamma)_1__AP011954	IncI1-I(Gamma)_1__AP005147				IncFIB(K)_1__JN233704	IncFIB(K)(pCAV1099-114)_1__CP011596									Col(MG828)_1__NC_008486																				A
ECL20622	Col(pHAD28)_1__KU674895				IncFIB(AP001918)_1__AP001918		IncFII_1__AY458016	IncFII(29)_1__CP003035	IncFII(pCoo)_1__CR942285	IncFII(pSE11)_1__AP009242				IncI(Gamma)_1__AP011954	IncI1-I(Gamma)_1__AP005147				IncFIB(K)_1__JN233704	IncFIB(K)(pCAV1099-114)_1__CP011596									Col(MG828)_1__NC_008486																				A
ECL20627	Col(pHAD28)_1__KU674895				IncFIB(AP001918)_1__AP001918	IncFIC(FII)_1__AP001918	IncFII_1__AY458016	IncFII(29)_1__CP003035	IncFII(pCoo)_1__CR942285	IncFII(pSE11)_1__AP009242				IncI(Gamma)_1__AP011954	IncI1-I(Gamma)_1__AP005147				IncFIB(K)_1__JN233704	IncFIB(K)(pCAV1099-114)_1__CP011596																													A
ECL20725	Col(pHAD28)_1__KU674895				IncFIB(AP001918)_1__AP001918		IncFII_1__AY458016	IncFII(29)_1__CP003035	IncFII(pCoo)_1__CR942285	IncFII(pSE11)_1__AP009242				IncI(Gamma)_1__AP011954	IncI1-I(Gamma)_1__AP005147			IncQ1_1__M28829	IncFIB(K)_1__JN233704	IncFIB(K)(pCAV1099-114)_1__CP011596																													A
ECL20769	Col(pHAD28)_1__KU674895				IncFIB(AP001918)_1__AP001918	IncFIC(FII)_1__AP001918	IncFII_1__AY458016	IncFII(29)_1__CP003035	IncFII(pCoo)_1__CR942285	IncFII(pSE11)_1__AP009242				IncI(Gamma)_1__AP011954	IncI1-I(Gamma)_1__AP005147				IncFIB(K)_1__JN233704	IncFIB(K)(pCAV1099-114)_1__CP011596																													A
ECL20776	Col(pHAD28)_1__KU674895						IncFII_1__AY458016	IncFII(29)_1__CP003035	IncFII(pCoo)_1__CR942285	IncFII(pSE11)_1__AP009242				IncI(Gamma)_1__AP011954	IncI1-I(Gamma)_1__AP005147				IncFIB(K)_1__JN233704	IncFIB(K)(pCAV1099-114)_1__CP011596							IncA_1__FJ705807	IncC_1__JN157804	Col(MG828)_1__NC_008486																				A
ECL20778	Col(pHAD28)_1__KU674895		IncB/O/K/Z_2__GU256641			IncFIC(FII)_1__AP001918	IncFII_1__AY458016	IncFII(29)_1__CP003035	IncFII(pCoo)_1__CR942285	IncFII(pSE11)_1__AP009242				IncI(Gamma)_1__AP011954	IncI1-I(Gamma)_1__AP005147			IncQ1_1__M28829	IncFIB(K)_1__JN233704	IncFIB(K)(pCAV1099-114)_1__CP011596									Col(MG828)_1__NC_008486																				A
ECL20814	Col(pHAD28)_1__KU674895				IncFIB(AP001918)_1__AP001918	IncFIC(FII)_1__AP001918	IncFII_1__AY458016	IncFII(29)_1__CP003035	IncFII(pCoo)_1__CR942285	IncFII(pSE11)_1__AP009242				IncI(Gamma)_1__AP011954	IncI1-I(Gamma)_1__AP005147				IncFIB(K)_1__JN233704	IncFIB(K)(pCAV1099-114)_1__CP011596																													A
ECL20836	Col(pHAD28)_1__KU674895				IncFIB(AP001918)_1__AP001918	IncFIC(FII)_1__AP001918	IncFII_1__AY458016	IncFII(29)_1__CP003035	IncFII(pCoo)_1__CR942285	IncFII(pSE11)_1__AP009242				IncI(Gamma)_1__AP011954	IncI1-I(Gamma)_1__AP005147				IncFIB(K)_1__JN233704	IncFIB(K)(pCAV1099-114)_1__CP011596																													A
ECL20846	Col(pHAD28)_1__KU674895				IncFIB(AP001918)_1__AP001918		IncFII_1__AY458016	IncFII(29)_1__CP003035	IncFII(pCoo)_1__CR942285	IncFII(pSE11)_1__AP009242				IncI(Gamma)_1__AP011954	IncI1-I(Gamma)_1__AP005147				IncFIB(K)_1__JN233704	IncFIB(K)(pCAV1099-114)_1__CP011596																								pKPC-CAV1321_1__CP011611					A
ECL20850	Col(pHAD28)_1__KU674895				IncFIB(AP001918)_1__AP001918	IncFIC(FII)_1__AP001918	IncFII_1__AY458016	IncFII(29)_1__CP003035	IncFII(pCoo)_1__CR942285	IncFII(pSE11)_1__AP009242				IncI(Gamma)_1__AP011954	IncI1-I(Gamma)_1__AP005147			IncQ1_1__M28829	IncFIB(K)_1__JN233704	IncFIB(K)(pCAV1099-114)_1__CP011596									Col(MG828)_1__NC_008486																				A
ECL20887	Col(pHAD28)_1__KU674895						IncFII_1__AY458016	IncFII(29)_1__CP003035	IncFII(pCoo)_1__CR942285	IncFII(pSE11)_1__AP009242				IncI(Gamma)_1__AP011954	IncI1-I(Gamma)_1__AP005147				IncFIB(K)_1__JN233704	IncFIB(K)(pCAV1099-114)_1__CP011596																													A
ECL20896	Col(pHAD28)_1__KU674895				IncFIB(AP001918)_1__AP001918		IncFII_1__AY458016	IncFII(29)_1__CP003035	IncFII(pCoo)_1__CR942285	IncFII(pSE11)_1__AP009242				IncI(Gamma)_1__AP011954	IncI1-I(Gamma)_1__AP005147				IncFIB(K)_1__JN233704	IncFIB(K)(pCAV1099-114)_1__CP011596														ColRNAI_1__DQ298019															A
ECL20911	Col(pHAD28)_1__KU674895				IncFIB(AP001918)_1__AP001918	IncFIC(FII)_1__AP001918	IncFII_1__AY458016	IncFII(29)_1__CP003035	IncFII(pCoo)_1__CR942285	IncFII(pSE11)_1__AP009242				IncI(Gamma)_1__AP011954	IncI1-I(Gamma)_1__AP005147				IncFIB(K)_1__JN233704	IncFIB(K)(pCAV1099-114)_1__CP011596																													A
ECL20918	Col(pHAD28)_1__KU674895				IncFIB(AP001918)_1__AP001918	IncFIC(FII)_1__AP001918	IncFII_1__AY458016	IncFII(29)_1__CP003035	IncFII(pCoo)_1__CR942285	IncFII(pSE11)_1__AP009242				IncI(Gamma)_1__AP011954	IncI1-I(Gamma)_1__AP005147				IncFIB(K)_1__JN233704	IncFIB(K)(pCAV1099-114)_1__CP011596														ColRNAI_1__DQ298019															A
ECL20924	Col(pHAD28)_1__KU674895				IncFIB(AP001918)_1__AP001918	IncFIC(FII)_1__AP001918	IncFII_1__AY458016	IncFII(29)_1__CP003035	IncFII(pCoo)_1__CR942285	IncFII(pSE11)_1__AP009242				IncI(Gamma)_1__AP011954	IncI1-I(Gamma)_1__AP005147				IncFIB(K)_1__JN233704	IncFIB(K)(pCAV1099-114)_1__CP011596									Col(MG828)_1__NC_008486																				A
ECL21259	Col(pHAD28)_1__KU674895				IncFIB(AP001918)_1__AP001918	IncFIC(FII)_1__AP001918	IncFII_1__AY458016	IncFII(29)_1__CP003035	IncFII(pCoo)_1__CR942285	IncFII(pSE11)_1__AP009242				IncI(Gamma)_1__AP011954	IncI1-I(Gamma)_1__AP005147				IncFIB(K)_1__JN233704	IncFIB(K)(pCAV1099-114)_1__CP011596																													A
ECL21274	Col(pHAD28)_1__KU674895						IncFII_1__AY458016	IncFII(29)_1__CP003035	IncFII(pCoo)_1__CR942285	IncFII(pSE11)_1__AP009242				IncI(Gamma)_1__AP011954	IncI1-I(Gamma)_1__AP005147				IncFIB(K)_1__JN233704	IncFIB(K)(pCAV1099-114)_1__CP011596																													A
ECL21290	Col(pHAD28)_1__KU674895				IncFIB(AP001918)_1__AP001918	IncFIC(FII)_1__AP001918	IncFII_1__AY458016	IncFII(29)_1__CP003035	IncFII(pCoo)_1__CR942285	IncFII(pSE11)_1__AP009242				IncI(Gamma)_1__AP011954	IncI1-I(Gamma)_1__AP005147				IncFIB(K)_1__JN233704	IncFIB(K)(pCAV1099-114)_1__CP011596																													A
ECL21405	Col(pHAD28)_1__KU674895				IncFIB(AP001918)_1__AP001918	IncFIC(FII)_1__AP001918	IncFII_1__AY458016	IncFII(29)_1__CP003035	IncFII(pCoo)_1__CR942285	IncFII(pSE11)_1__AP009242				IncI(Gamma)_1__AP011954	IncI1-I(Gamma)_1__AP005147			IncQ1_1__M28829	IncFIB(K)_1__JN233704	IncFIB(K)(pCAV1099-114)_1__CP011596												IncHI2_1__BX664015	IncHI2A_1__BX664015																A
ECL21412	Col(pHAD28)_1__KU674895				IncFIB(AP001918)_1__AP001918	IncFIC(FII)_1__AP001918	IncFII_1__AY458016	IncFII(29)_1__CP003035	IncFII(pCoo)_1__CR942285	IncFII(pSE11)_1__AP009242				IncI(Gamma)_1__AP011954	IncI1-I(Gamma)_1__AP005147				IncFIB(K)_1__JN233704	IncFIB(K)(pCAV1099-114)_1__CP011596							IncA_1__FJ705807	IncC_1__JN157804																					A
ECL21483	Col(pHAD28)_1__KU674895				IncFIB(AP001918)_1__AP001918		IncFII_1__AY458016	IncFII(29)_1__CP003035	IncFII(pCoo)_1__CR942285	IncFII(pSE11)_1__AP009242				IncI(Gamma)_1__AP011954	IncI1-I(Gamma)_1__AP005147				IncFIB(K)_1__JN233704	IncFIB(K)(pCAV1099-114)_1__CP011596							IncA_1__FJ705807	IncC_1__JN157804	Col(MG828)_1__NC_008486																				A
ECL21505	Col(pHAD28)_1__KU674895				IncFIB(AP001918)_1__AP001918		IncFII_1__AY458016	IncFII(29)_1__CP003035	IncFII(pCoo)_1__CR942285	IncFII(pSE11)_1__AP009242				IncI(Gamma)_1__AP011954	IncI1-I(Gamma)_1__AP005147				IncFIB(K)_1__JN233704	IncFIB(K)(pCAV1099-114)_1__CP011596									Col(MG828)_1__NC_008486																				A
ECL21512	Col(pHAD28)_1__KU674895				IncFIB(AP001918)_1__AP001918									IncI(Gamma)_1__AP011954	IncI1-I(Gamma)_1__AP005147				IncFIB(K)_1__JN233704	IncFIB(K)(pCAV1099-114)_1__CP011596														ColRNAI_1__DQ298019															A
ECL21518	Col(pHAD28)_1__KU674895				IncFIB(AP001918)_1__AP001918	IncFIC(FII)_1__AP001918	IncFII_1__AY458016	IncFII(29)_1__CP003035	IncFII(pCoo)_1__CR942285	IncFII(pSE11)_1__AP009242				IncI(Gamma)_1__AP011954	IncI1-I(Gamma)_1__AP005147				IncFIB(K)_1__JN233704	IncFIB(K)(pCAV1099-114)_1__CP011596																													A
ECL21541	Col(pHAD28)_1__KU674895				IncFIB(AP001918)_1__AP001918	IncFIC(FII)_1__AP001918	IncFII_1__AY458016	IncFII(29)_1__CP003035	IncFII(pCoo)_1__CR942285	IncFII(pSE11)_1__AP009242				IncI(Gamma)_1__AP011954	IncI1-I(Gamma)_1__AP005147				IncFIB(K)_1__JN233704	IncFIB(K)(pCAV1099-114)_1__CP011596							IncA_1__FJ705807	IncC_1__JN157804																					A
ECL21542	Col(pHAD28)_1__KU674895				IncFIB(AP001918)_1__AP001918	IncFIC(FII)_1__AP001918	IncFII_1__AY458016	IncFII(29)_1__CP003035	IncFII(pCoo)_1__CR942285	IncFII(pSE11)_1__AP009242									IncFIB(K)_1__JN233704	IncFIB(K)(pCAV1099-114)_1__CP011596							IncA_1__FJ705807	IncC_1__JN157804																					A
ECL21551	Col(pHAD28)_1__KU674895				IncFIB(AP001918)_1__AP001918		IncFII_1__AY458016	IncFII(29)_1__CP003035	IncFII(pCoo)_1__CR942285	IncFII(pSE11)_1__AP009242				IncI(Gamma)_1__AP011954	IncI1-I(Gamma)_1__AP005147				IncFIB(K)_1__JN233704	IncFIB(K)(pCAV1099-114)_1__CP011596																													A
ECL21628	Col(pHAD28)_1__KU674895				IncFIB(AP001918)_1__AP001918	IncFIC(FII)_1__AP001918	IncFII_1__AY458016	IncFII(29)_1__CP003035	IncFII(pCoo)_1__CR942285	IncFII(pSE11)_1__AP009242				IncI(Gamma)_1__AP011954	IncI1-I(Gamma)_1__AP005147	IncI2_1__KP347127	IncI2(Delta)_1__AP002527		IncFIB(K)_1__JN233704	IncFIB(K)(pCAV1099-114)_1__CP011596																													A
ECL21652	Col(pHAD28)_1__KU674895				IncFIB(AP001918)_1__AP001918	IncFIC(FII)_1__AP001918	IncFII_1__AY458016	IncFII(29)_1__CP003035	IncFII(pCoo)_1__CR942285	IncFII(pSE11)_1__AP009242				IncI(Gamma)_1__AP011954	IncI1-I(Gamma)_1__AP005147				IncFIB(K)_1__JN233704	IncFIB(K)(pCAV1099-114)_1__CP011596							IncA_1__FJ705807	IncC_1__JN157804																					A
ECL21655	Col(pHAD28)_1__KU674895				IncFIB(AP001918)_1__AP001918	IncFIC(FII)_1__AP001918	IncFII_1__AY458016	IncFII(29)_1__CP003035	IncFII(pCoo)_1__CR942285	IncFII(pSE11)_1__AP009242				IncI(Gamma)_1__AP011954	IncI1-I(Gamma)_1__AP005147				IncFIB(K)_1__JN233704	IncFIB(K)(pCAV1099-114)_1__CP011596							IncA_1__FJ705807	IncC_1__JN157804	Col(MG828)_1__NC_008486																				A
ECL21657	Col(pHAD28)_1__KU674895				IncFIB(AP001918)_1__AP001918	IncFIC(FII)_1__AP001918	IncFII_1__AY458016	IncFII(29)_1__CP003035	IncFII(pCoo)_1__CR942285	IncFII(pSE11)_1__AP009242				IncI(Gamma)_1__AP011954	IncI1-I(Gamma)_1__AP005147				IncFIB(K)_1__JN233704	IncFIB(K)(pCAV1099-114)_1__CP011596							IncA_1__FJ705807	IncC_1__JN157804																					A
ECL21676	Col(pHAD28)_1__KU674895				IncFIB(AP001918)_1__AP001918	IncFIC(FII)_1__AP001918	IncFII_1__AY458016	IncFII(29)_1__CP003035	IncFII(pCoo)_1__CR942285	IncFII(pSE11)_1__AP009242				IncI(Gamma)_1__AP011954	IncI1-I(Gamma)_1__AP005147				IncFIB(K)_1__JN233704	IncFIB(K)(pCAV1099-114)_1__CP011596							IncA_1__FJ705807	IncC_1__JN157804																					A
ECL21680	Col(pHAD28)_1__KU674895				IncFIB(AP001918)_1__AP001918	IncFIC(FII)_1__AP001918	IncFII_1__AY458016	IncFII(29)_1__CP003035	IncFII(pCoo)_1__CR942285	IncFII(pSE11)_1__AP009242				IncI(Gamma)_1__AP011954	IncI1-I(Gamma)_1__AP005147				IncFIB(K)_1__JN233704	IncFIB(K)(pCAV1099-114)_1__CP011596																													A
ECL21730	Col(pHAD28)_1__KU674895						IncFII_1__AY458016	IncFII(29)_1__CP003035	IncFII(pCoo)_1__CR942285	IncFII(pSE11)_1__AP009242				IncI(Gamma)_1__AP011954	IncI1-I(Gamma)_1__AP005147				IncFIB(K)_1__JN233704	IncFIB(K)(pCAV1099-114)_1__CP011596																													A
ECL21837	Col(pHAD28)_1__KU674895				IncFIB(AP001918)_1__AP001918	IncFIC(FII)_1__AP001918	IncFII_1__AY458016	IncFII(29)_1__CP003035	IncFII(pCoo)_1__CR942285	IncFII(pSE11)_1__AP009242				IncI(Gamma)_1__AP011954	IncI1-I(Gamma)_1__AP005147				IncFIB(K)_1__JN233704	IncFIB(K)(pCAV1099-114)_1__CP011596																													A
ECL21979	Col(pHAD28)_1__KU674895				IncFIB(AP001918)_1__AP001918		IncFII_1__AY458016	IncFII(29)_1__CP003035	IncFII(pCoo)_1__CR942285	IncFII(pSE11)_1__AP009242				IncI(Gamma)_1__AP011954	IncI1-I(Gamma)_1__AP005147				IncFIB(K)_1__JN233704	IncFIB(K)(pCAV1099-114)_1__CP011596							IncA_1__FJ705807	IncC_1__JN157804																					A
ECL22052	Col(pHAD28)_1__KU674895						IncFII_1__AY458016	IncFII(29)_1__CP003035	IncFII(pCoo)_1__CR942285	IncFII(pSE11)_1__AP009242				IncI(Gamma)_1__AP011954	IncI1-I(Gamma)_1__AP005147				IncFIB(K)_1__JN233704	IncFIB(K)(pCAV1099-114)_1__CP011596	IncN_1__AY046276								Col(MG828)_1__NC_008486																ColpVC_1__JX133088				A
ECL22093	Col(pHAD28)_1__KU674895				IncFIB(AP001918)_1__AP001918		IncFII_1__AY458016	IncFII(29)_1__CP003035	IncFII(pCoo)_1__CR942285	IncFII(pSE11)_1__AP009242				IncI(Gamma)_1__AP011954	IncI1-I(Gamma)_1__AP005147				IncFIB(K)_1__JN233704	IncFIB(K)(pCAV1099-114)_1__CP011596	IncN_1__AY046276																												A
ECL22099	Col(pHAD28)_1__KU674895				IncFIB(AP001918)_1__AP001918	IncFIC(FII)_1__AP001918								IncI(Gamma)_1__AP011954	IncI1-I(Gamma)_1__AP005147				IncFIB(K)_1__JN233704	IncFIB(K)(pCAV1099-114)_1__CP011596									Col(MG828)_1__NC_008486																				A
ECL22128	Col(pHAD28)_1__KU674895				IncFIB(AP001918)_1__AP001918	IncFIC(FII)_1__AP001918	IncFII_1__AY458016	IncFII(29)_1__CP003035	IncFII(pCoo)_1__CR942285	IncFII(pSE11)_1__AP009242				IncI(Gamma)_1__AP011954	IncI1-I(Gamma)_1__AP005147				IncFIB(K)_1__JN233704	IncFIB(K)(pCAV1099-114)_1__CP011596						Col156_1__NC_009781																							A
ECL22134	Col(pHAD28)_1__KU674895				IncFIB(AP001918)_1__AP001918	IncFIC(FII)_1__AP001918	IncFII_1__AY458016	IncFII(29)_1__CP003035	IncFII(pCoo)_1__CR942285	IncFII(pSE11)_1__AP009242				IncI(Gamma)_1__AP011954	IncI1-I(Gamma)_1__AP005147				IncFIB(K)_1__JN233704	IncFIB(K)(pCAV1099-114)_1__CP011596																													A
ECL22215	Col(pHAD28)_1__KU674895				IncFIB(AP001918)_1__AP001918		IncFII_1__AY458016	IncFII(29)_1__CP003035	IncFII(pCoo)_1__CR942285	IncFII(pSE11)_1__AP009242				IncI(Gamma)_1__AP011954	IncI1-I(Gamma)_1__AP005147				IncFIB(K)_1__JN233704	IncFIB(K)(pCAV1099-114)_1__CP011596												IncHI2_1__BX664015	IncHI2A_1__BX664015																A
ECL22265	Col(pHAD28)_1__KU674895				IncFIB(AP001918)_1__AP001918		IncFII_1__AY458016	IncFII(29)_1__CP003035	IncFII(pCoo)_1__CR942285	IncFII(pSE11)_1__AP009242				IncI(Gamma)_1__AP011954	IncI1-I(Gamma)_1__AP005147				IncFIB(K)_1__JN233704	IncFIB(K)(pCAV1099-114)_1__CP011596			IncFII(pRSB107)_1__AJ851089	IncFII(pSFO)_1__AF401292								IncHI2_1__BX664015	IncHI2A_1__BX664015																A
ECL22274	Col(pHAD28)_1__KU674895				IncFIB(AP001918)_1__AP001918	IncFIC(FII)_1__AP001918	IncFII_1__AY458016	IncFII(29)_1__CP003035	IncFII(pCoo)_1__CR942285	IncFII(pSE11)_1__AP009242				IncI(Gamma)_1__AP011954	IncI1-I(Gamma)_1__AP005147				IncFIB(K)_1__JN233704	IncFIB(K)(pCAV1099-114)_1__CP011596																													A
ECL22293	Col(pHAD28)_1__KU674895				IncFIB(AP001918)_1__AP001918	IncFIC(FII)_1__AP001918	IncFII_1__AY458016	IncFII(29)_1__CP003035	IncFII(pCoo)_1__CR942285	IncFII(pSE11)_1__AP009242									IncFIB(K)_1__JN233704	IncFIB(K)(pCAV1099-114)_1__CP011596																													A
ECL22298	Col(pHAD28)_1__KU674895				IncFIB(AP001918)_1__AP001918	IncFIC(FII)_1__AP001918	IncFII_1__AY458016	IncFII(29)_1__CP003035	IncFII(pCoo)_1__CR942285	IncFII(pSE11)_1__AP009242				IncI(Gamma)_1__AP011954	IncI1-I(Gamma)_1__AP005147				IncFIB(K)_1__JN233704	IncFIB(K)(pCAV1099-114)_1__CP011596																													A
ECL22433	Col(pHAD28)_1__KU674895				IncFIB(AP001918)_1__AP001918		IncFII_1__AY458016	IncFII(29)_1__CP003035	IncFII(pCoo)_1__CR942285	IncFII(pSE11)_1__AP009242				IncI(Gamma)_1__AP011954	IncI1-I(Gamma)_1__AP005147				IncFIB(K)_1__JN233704	IncFIB(K)(pCAV1099-114)_1__CP011596			IncFII(pRSB107)_1__AJ851089	IncFII(pSFO)_1__AF401292								IncHI2_1__BX664015	IncHI2A_1__BX664015																A
ECL22438	Col(pHAD28)_1__KU674895				IncFIB(AP001918)_1__AP001918	IncFIC(FII)_1__AP001918	IncFII_1__AY458016	IncFII(29)_1__CP003035	IncFII(pCoo)_1__CR942285	IncFII(pSE11)_1__AP009242				IncI(Gamma)_1__AP011954	IncI1-I(Gamma)_1__AP005147				IncFIB(K)_1__JN233704	IncFIB(K)(pCAV1099-114)_1__CP011596							IncA_1__FJ705807	IncC_1__JN157804																					A
ECL22447	Col(pHAD28)_1__KU674895				IncFIB(AP001918)_1__AP001918	IncFIC(FII)_1__AP001918	IncFII_1__AY458016	IncFII(29)_1__CP003035	IncFII(pCoo)_1__CR942285	IncFII(pSE11)_1__AP009242				IncI(Gamma)_1__AP011954	IncI1-I(Gamma)_1__AP005147				IncFIB(K)_1__JN233704	IncFIB(K)(pCAV1099-114)_1__CP011596																													A
ECL22491	Col(pHAD28)_1__KU674895				IncFIB(AP001918)_1__AP001918		IncFII_1__AY458016	IncFII(29)_1__CP003035	IncFII(pCoo)_1__CR942285	IncFII(pSE11)_1__AP009242				IncI(Gamma)_1__AP011954	IncI1-I(Gamma)_1__AP005147				IncFIB(K)_1__JN233704	IncFIB(K)(pCAV1099-114)_1__CP011596														ColRNAI_1__DQ298019															A
ECL22503	Col(pHAD28)_1__KU674895						IncFII_1__AY458016	IncFII(29)_1__CP003035	IncFII(pCoo)_1__CR942285	IncFII(pSE11)_1__AP009242				IncI(Gamma)_1__AP011954	IncI1-I(Gamma)_1__AP005147	IncI2_1__KP347127	IncI2(Delta)_1__AP002527		IncFIB(K)_1__JN233704	IncFIB(K)(pCAV1099-114)_1__CP011596			IncFII(pRSB107)_1__AJ851089	IncFII(pSFO)_1__AF401292																									A
ECL22505	Col(pHAD28)_1__KU674895				IncFIB(AP001918)_1__AP001918	IncFIC(FII)_1__AP001918	IncFII_1__AY458016	IncFII(29)_1__CP003035	IncFII(pCoo)_1__CR942285	IncFII(pSE11)_1__AP009242				IncI(Gamma)_1__AP011954	IncI1-I(Gamma)_1__AP005147				IncFIB(K)_1__JN233704	IncFIB(K)(pCAV1099-114)_1__CP011596																													A
ECL22536	Col(pHAD28)_1__KU674895				IncFIB(AP001918)_1__AP001918	IncFIC(FII)_1__AP001918	IncFII_1__AY458016	IncFII(29)_1__CP003035	IncFII(pCoo)_1__CR942285	IncFII(pSE11)_1__AP009242				IncI(Gamma)_1__AP011954	IncI1-I(Gamma)_1__AP005147				IncFIB(K)_1__JN233704	IncFIB(K)(pCAV1099-114)_1__CP011596																													A
ECL22553	Col(pHAD28)_1__KU674895				IncFIB(AP001918)_1__AP001918		IncFII_1__AY458016	IncFII(29)_1__CP003035	IncFII(pCoo)_1__CR942285	IncFII(pSE11)_1__AP009242				IncI(Gamma)_1__AP011954	IncI1-I(Gamma)_1__AP005147				IncFIB(K)_1__JN233704	IncFIB(K)(pCAV1099-114)_1__CP011596									Col(MG828)_1__NC_008486																				A
ECL22800	Col(pHAD28)_1__KU674895				IncFIB(AP001918)_1__AP001918	IncFIC(FII)_1__AP001918	IncFII_1__AY458016	IncFII(29)_1__CP003035	IncFII(pCoo)_1__CR942285	IncFII(pSE11)_1__AP009242				IncI(Gamma)_1__AP011954	IncI1-I(Gamma)_1__AP005147				IncFIB(K)_1__JN233704	IncFIB(K)(pCAV1099-114)_1__CP011596																													A
ECL22867	Col(pHAD28)_1__KU674895				IncFIB(AP001918)_1__AP001918	IncFIC(FII)_1__AP001918	IncFII_1__AY458016	IncFII(29)_1__CP003035	IncFII(pCoo)_1__CR942285	IncFII(pSE11)_1__AP009242				IncI(Gamma)_1__AP011954	IncI1-I(Gamma)_1__AP005147				IncFIB(K)_1__JN233704	IncFIB(K)(pCAV1099-114)_1__CP011596																													A
ECL22868	Col(pHAD28)_1__KU674895				IncFIB(AP001918)_1__AP001918	IncFIC(FII)_1__AP001918	IncFII_1__AY458016	IncFII(29)_1__CP003035	IncFII(pCoo)_1__CR942285	IncFII(pSE11)_1__AP009242				IncI(Gamma)_1__AP011954	IncI1-I(Gamma)_1__AP005147				IncFIB(K)_1__JN233704	IncFIB(K)(pCAV1099-114)_1__CP011596																													A
ECL22887	Col(pHAD28)_1__KU674895				IncFIB(AP001918)_1__AP001918	IncFIC(FII)_1__AP001918	IncFII_1__AY458016	IncFII(29)_1__CP003035	IncFII(pCoo)_1__CR942285	IncFII(pSE11)_1__AP009242				IncI(Gamma)_1__AP011954	IncI1-I(Gamma)_1__AP005147				IncFIB(K)_1__JN233704	IncFIB(K)(pCAV1099-114)_1__CP011596																													A
ECL22967	Col(pHAD28)_1__KU674895				IncFIB(AP001918)_1__AP001918		IncFII_1__AY458016	IncFII(29)_1__CP003035	IncFII(pCoo)_1__CR942285	IncFII(pSE11)_1__AP009242				IncI(Gamma)_1__AP011954	IncI1-I(Gamma)_1__AP005147				IncFIB(K)_1__JN233704	IncFIB(K)(pCAV1099-114)_1__CP011596							IncA_1__FJ705807	IncC_1__JN157804										Col440II_1__CP023921											A
ECL23013	Col(pHAD28)_1__KU674895				IncFIB(AP001918)_1__AP001918		IncFII_1__AY458016	IncFII(29)_1__CP003035	IncFII(pCoo)_1__CR942285	IncFII(pSE11)_1__AP009242				IncI(Gamma)_1__AP011954	IncI1-I(Gamma)_1__AP005147				IncFIB(K)_1__JN233704	IncFIB(K)(pCAV1099-114)_1__CP011596							IncA_1__FJ705807	IncC_1__JN157804																					A
ECL23067	Col(pHAD28)_1__KU674895				IncFIB(AP001918)_1__AP001918	IncFIC(FII)_1__AP001918	IncFII_1__AY458016	IncFII(29)_1__CP003035	IncFII(pCoo)_1__CR942285	IncFII(pSE11)_1__AP009242				IncI(Gamma)_1__AP011954	IncI1-I(Gamma)_1__AP005147				IncFIB(K)_1__JN233704	IncFIB(K)(pCAV1099-114)_1__CP011596										Col440I_1__CP023920																			A
ECL07805	Col(pHAD28)_1__KU674895				IncFIB(AP001918)_1__AP001918	IncFIC(FII)_1__AP001918	IncFII_1__AY458016	IncFII(29)_1__CP003035	IncFII(pCoo)_1__CR942285	IncFII(pSE11)_1__AP009242				IncI(Gamma)_1__AP011954	IncI1-I(Gamma)_1__AP005147																																		A
ECL09114	Col(pHAD28)_1__KU674895				IncFIB(AP001918)_1__AP001918		IncFII_1__AY458016	IncFII(29)_1__CP003035	IncFII(pCoo)_1__CR942285	IncFII(pSE11)_1__AP009242				IncI(Gamma)_1__AP011954	IncI1-I(Gamma)_1__AP005147						IncN_1__AY046276																												A
ECL10170	Col(pHAD28)_1__KU674895				IncFIB(AP001918)_1__AP001918	IncFIC(FII)_1__AP001918	IncFII_1__AY458016	IncFII(29)_1__CP003035	IncFII(pCoo)_1__CR942285	IncFII(pSE11)_1__AP009242								IncQ1_1__M28829																															A
ECL11324	Col(pHAD28)_1__KU674895				IncFIB(AP001918)_1__AP001918	IncFIC(FII)_1__AP001918	IncFII_1__AY458016	IncFII(29)_1__CP003035	IncFII(pCoo)_1__CR942285	IncFII(pSE11)_1__AP009242				IncI(Gamma)_1__AP011954	IncI1-I(Gamma)_1__AP005147	IncI2_1__KP347127	IncI2(Delta)_1__AP002527																																A
ECL13086	Col(pHAD28)_1__KU674895				IncFIB(AP001918)_1__AP001918	IncFIC(FII)_1__AP001918	IncFII_1__AY458016	IncFII(29)_1__CP003035	IncFII(pCoo)_1__CR942285	IncFII(pSE11)_1__AP009242				IncI(Gamma)_1__AP011954	IncI1-I(Gamma)_1__AP005147			IncQ1_1__M28829									IncA_1__FJ705807	IncC_1__JN157804																					A
ECL13345	Col(pHAD28)_1__KU674895		IncB/O/K/Z_2__GU256641		IncFIB(AP001918)_1__AP001918		IncFII_1__AY458016	IncFII(29)_1__CP003035	IncFII(pCoo)_1__CR942285	IncFII(pSE11)_1__AP009242				IncI(Gamma)_1__AP011954	IncI1-I(Gamma)_1__AP005147											Col156_1__NC_009781																							A
ECL18172	Col(pHAD28)_1__KU674895				IncFIB(AP001918)_1__AP001918	IncFIC(FII)_1__AP001918	IncFII_1__AY458016	IncFII(29)_1__CP003035	IncFII(pCoo)_1__CR942285	IncFII(pSE11)_1__AP009242				IncI(Gamma)_1__AP011954	IncI1-I(Gamma)_1__AP005147	IncI2_1__KP347127	IncI2(Delta)_1__AP002527																																A
ECL18728	Col(pHAD28)_1__KU674895				IncFIB(AP001918)_1__AP001918		IncFII_1__AY458016	IncFII(29)_1__CP003035	IncFII(pCoo)_1__CR942285	IncFII(pSE11)_1__AP009242				IncI(Gamma)_1__AP011954	IncI1-I(Gamma)_1__AP005147			IncQ1_1__M28829																	IncX3_1__JN247852													2	A
ECL19517	Col(pHAD28)_1__KU674895						IncFII_1__AY458016	IncFII(29)_1__CP003035	IncFII(pCoo)_1__CR942285	IncFII(pSE11)_1__AP009242				IncI(Gamma)_1__AP011954	IncI1-I(Gamma)_1__AP005147																																		A
ECL22741	Col(pHAD28)_1__KU674895				IncFIB(AP001918)_1__AP001918		IncFII_1__AY458016	IncFII(29)_1__CP003035	IncFII(pCoo)_1__CR942285	IncFII(pSE11)_1__AP009242				IncI(Gamma)_1__AP011954	IncI1-I(Gamma)_1__AP005147																																		A
ECL85531	Col(pHAD28)_1__KU674895				IncFIB(AP001918)_1__AP001918	IncFIC(FII)_1__AP001918	IncFII_1__AY458016	IncFII(29)_1__CP003035	IncFII(pCoo)_1__CR942285	IncFII(pSE11)_1__AP009242				IncI(Gamma)_1__AP011954	IncI1-I(Gamma)_1__AP005147				IncFIB(K)_1__JN233704	IncFIB(K)(pCAV1099-114)_1__CP011596	IncN_1__AY046276																												A
ECL00351	Col(pHAD28)_1__KU674895				IncFIB(AP001918)_1__AP001918	IncFIC(FII)_1__AP001918	IncFII_1__AY458016	IncFII(29)_1__CP003035	IncFII(pCoo)_1__CR942285	IncFII(pSE11)_1__AP009242				IncI(Gamma)_1__AP011954	IncI1-I(Gamma)_1__AP005147															Col440I_1__CP023920																			A
ECL00652	Col(pHAD28)_1__KU674895				IncFIB(AP001918)_1__AP001918		IncFII_1__AY458016	IncFII(29)_1__CP003035	IncFII(pCoo)_1__CR942285	IncFII(pSE11)_1__AP009242				IncI(Gamma)_1__AP011954	IncI1-I(Gamma)_1__AP005147			IncQ1_1__M28829						IncFII(pSFO)_1__AF401292	IncX1_1__EU370913					Col440I_1__CP023920						IncFII(pHN7A8)_1__JN232517													A
ECL09646	Col(pHAD28)_1__KU674895				IncFIB(AP001918)_1__AP001918	IncFIC(FII)_1__AP001918	IncFII_1__AY458016	IncFII(29)_1__CP003035	IncFII(pCoo)_1__CR942285	IncFII(pSE11)_1__AP009242				IncI(Gamma)_1__AP011954	IncI1-I(Gamma)_1__AP005147									IncFII(pSFO)_1__AF401292						Col440I_1__CP023920						IncFII(pHN7A8)_1__JN232517													A
ECL10647	Col(pHAD28)_1__KU674895				IncFIB(AP001918)_1__AP001918		IncFII_1__AY458016	IncFII(29)_1__CP003035	IncFII(pCoo)_1__CR942285	IncFII(pSE11)_1__AP009242				IncI(Gamma)_1__AP011954	IncI1-I(Gamma)_1__AP005147									IncFII(pSFO)_1__AF401292	IncX1_1__EU370913					Col440I_1__CP023920						IncFII(pHN7A8)_1__JN232517						IncY_1__K02380							A
ECL11171	Col(pHAD28)_1__KU674895	FIA(pBK30683)_1__KF954760		IncFIA(HI1)_1__AF250878		IncFIC(FII)_1__AP001918	IncFII_1__AY458016	IncFII(29)_1__CP003035	IncFII(pCoo)_1__CR942285	IncFII(pSE11)_1__AP009242	IncHI1A_1__AF250878	IncHI1B(R27)_1_R27_AF250878	IncHI1B(pNDM-CIT)_1__JX182975	IncI(Gamma)_1__AP011954	IncI1-I(Gamma)_1__AP005147			IncQ1_1__M28829												Col440I_1__CP023920																			A
ECL14048	Col(pHAD28)_1__KU674895				IncFIB(AP001918)_1__AP001918									IncI(Gamma)_1__AP011954	IncI1-I(Gamma)_1__AP005147	IncI2_1__KP347127	IncI2(Delta)_1__AP002527	IncQ1_1__M28829												Col440I_1__CP023920																			A
ECL18573	Col(pHAD28)_1__KU674895				IncFIB(AP001918)_1__AP001918	IncFIC(FII)_1__AP001918	IncFII_1__AY458016	IncFII(29)_1__CP003035	IncFII(pCoo)_1__CR942285	IncFII(pSE11)_1__AP009242				IncI(Gamma)_1__AP011954	IncI1-I(Gamma)_1__AP005147	IncI2_1__KP347127	IncI2(Delta)_1__AP002527	IncQ1_1__M28829						IncFII(pSFO)_1__AF401292						Col440I_1__CP023920						IncFII(pHN7A8)_1__JN232517													A
ECL19125	Col(pHAD28)_1__KU674895				IncFIB(AP001918)_1__AP001918	IncFIC(FII)_1__AP001918	IncFII_1__AY458016	IncFII(29)_1__CP003035	IncFII(pCoo)_1__CR942285	IncFII(pSE11)_1__AP009242				IncI(Gamma)_1__AP011954	IncI1-I(Gamma)_1__AP005147	IncI2_1__KP347127	IncI2(Delta)_1__AP002527								IncX1_1__EU370913					Col440I_1__CP023920													p0111_1__AP010962						A
ECL19187	Col(pHAD28)_1__KU674895				IncFIB(AP001918)_1__AP001918	IncFIC(FII)_1__AP001918	IncFII_1__AY458016	IncFII(29)_1__CP003035	IncFII(pCoo)_1__CR942285	IncFII(pSE11)_1__AP009242				IncI(Gamma)_1__AP011954	IncI1-I(Gamma)_1__AP005147	IncI2_1__KP347127	IncI2(Delta)_1__AP002527	IncQ1_1__M28829						IncFII(pSFO)_1__AF401292						Col440I_1__CP023920						IncFII(pHN7A8)_1__JN232517													A
ECL19345	Col(pHAD28)_1__KU674895						IncFII_1__AY458016	IncFII(29)_1__CP003035	IncFII(pCoo)_1__CR942285	IncFII(pSE11)_1__AP009242				IncI(Gamma)_1__AP011954	IncI1-I(Gamma)_1__AP005147															Col440I_1__CP023920																			A
ECL19403	Col(pHAD28)_1__KU674895						IncFII_1__AY458016	IncFII(29)_1__CP003035	IncFII(pCoo)_1__CR942285	IncFII(pSE11)_1__AP009242				IncI(Gamma)_1__AP011954	IncI1-I(Gamma)_1__AP005147										IncX1_1__EU370913		IncA_1__FJ705807	IncC_1__JN157804		Col440I_1__CP023920													p0111_1__AP010962						A
ECL19889	Col(pHAD28)_1__KU674895	FIA(pBK30683)_1__KF954760			IncFIB(AP001918)_1__AP001918	IncFIC(FII)_1__AP001918	IncFII_1__AY458016	IncFII(29)_1__CP003035	IncFII(pCoo)_1__CR942285	IncFII(pSE11)_1__AP009242				IncI(Gamma)_1__AP011954	IncI1-I(Gamma)_1__AP005147										IncX1_1__EU370913		IncA_1__FJ705807	IncC_1__JN157804		Col440I_1__CP023920	IncFIA_1__AP001918												p0111_1__AP010962						A
ECL19901	Col(pHAD28)_1__KU674895													IncI(Gamma)_1__AP011954	IncI1-I(Gamma)_1__AP005147															Col440I_1__CP023920																			A
ECL19902	Col(pHAD28)_1__KU674895						IncFII_1__AY458016	IncFII(29)_1__CP003035	IncFII(pCoo)_1__CR942285	IncFII(pSE11)_1__AP009242				IncI(Gamma)_1__AP011954	IncI1-I(Gamma)_1__AP005147									IncFII(pSFO)_1__AF401292						Col440I_1__CP023920						IncFII(pHN7A8)_1__JN232517													A
ECL19508	Col(pHAD28)_1__KU674895				IncFIB(AP001918)_1__AP001918	IncFIC(FII)_1__AP001918	IncFII_1__AY458016	IncFII(29)_1__CP003035	IncFII(pCoo)_1__CR942285	IncFII(pSE11)_1__AP009242				IncI(Gamma)_1__AP011954	IncI1-I(Gamma)_1__AP005147			IncQ1_1__M28829					IncFII(pRSB107)_1__AJ851089	IncFII(pSFO)_1__AF401292												IncFII(pHN7A8)_1__JN232517				IncFII(pAMA1167-NDM-5)_1__CP024805									A
ECL19641	Col(pHAD28)_1__KU674895				IncFIB(AP001918)_1__AP001918	IncFIC(FII)_1__AP001918	IncFII_1__AY458016	IncFII(29)_1__CP003035	IncFII(pCoo)_1__CR942285	IncFII(pSE11)_1__AP009242													IncFII(pRSB107)_1__AJ851089	IncFII(pSFO)_1__AF401292												IncFII(pHN7A8)_1__JN232517				IncFII(pAMA1167-NDM-5)_1__CP024805									A
ECL19894	Col(pHAD28)_1__KU674895				IncFIB(AP001918)_1__AP001918	IncFIC(FII)_1__AP001918	IncFII_1__AY458016	IncFII(29)_1__CP003035	IncFII(pCoo)_1__CR942285	IncFII(pSE11)_1__AP009242													IncFII(pRSB107)_1__AJ851089	IncFII(pSFO)_1__AF401292												IncFII(pHN7A8)_1__JN232517				IncFII(pAMA1167-NDM-5)_1__CP024805									A
ECL19939	Col(pHAD28)_1__KU674895				IncFIB(AP001918)_1__AP001918	IncFIC(FII)_1__AP001918	IncFII_1__AY458016	IncFII(29)_1__CP003035	IncFII(pCoo)_1__CR942285	IncFII(pSE11)_1__AP009242													IncFII(pRSB107)_1__AJ851089	IncFII(pSFO)_1__AF401292												IncFII(pHN7A8)_1__JN232517				IncFII(pAMA1167-NDM-5)_1__CP024805									A
ECL20308	Col(pHAD28)_1__KU674895				IncFIB(AP001918)_1__AP001918	IncFIC(FII)_1__AP001918	IncFII_1__AY458016	IncFII(29)_1__CP003035	IncFII(pCoo)_1__CR942285	IncFII(pSE11)_1__AP009242				IncI(Gamma)_1__AP011954	IncI1-I(Gamma)_1__AP005147			IncQ1_1__M28829					IncFII(pRSB107)_1__AJ851089	IncFII(pSFO)_1__AF401292												IncFII(pHN7A8)_1__JN232517				IncFII(pAMA1167-NDM-5)_1__CP024805									A
ECL20550	Col(pHAD28)_1__KU674895						IncFII_1__AY458016	IncFII(29)_1__CP003035	IncFII(pCoo)_1__CR942285	IncFII(pSE11)_1__AP009242				IncI(Gamma)_1__AP011954	IncI1-I(Gamma)_1__AP005147								IncFII(pRSB107)_1__AJ851089	IncFII(pSFO)_1__AF401292												IncFII(pHN7A8)_1__JN232517				IncFII(pAMA1167-NDM-5)_1__CP024805									A
ECL21584	Col(pHAD28)_1__KU674895				IncFIB(AP001918)_1__AP001918	IncFIC(FII)_1__AP001918	IncFII_1__AY458016	IncFII(29)_1__CP003035	IncFII(pCoo)_1__CR942285	IncFII(pSE11)_1__AP009242				IncI(Gamma)_1__AP011954	IncI1-I(Gamma)_1__AP005147								IncFII(pRSB107)_1__AJ851089	IncFII(pSFO)_1__AF401292	IncX1_1__EU370913											IncFII(pHN7A8)_1__JN232517				IncFII(pAMA1167-NDM-5)_1__CP024805									A
ECL22487	Col(pHAD28)_1__KU674895				IncFIB(AP001918)_1__AP001918	IncFIC(FII)_1__AP001918	IncFII_1__AY458016	IncFII(29)_1__CP003035	IncFII(pCoo)_1__CR942285	IncFII(pSE11)_1__AP009242				IncI(Gamma)_1__AP011954	IncI1-I(Gamma)_1__AP005147								IncFII(pRSB107)_1__AJ851089	IncFII(pSFO)_1__AF401292												IncFII(pHN7A8)_1__JN232517				IncFII(pAMA1167-NDM-5)_1__CP024805									A
ECL19159	Col(pHAD28)_1__KU674895		IncB/O/K/Z_2__GU256641		IncFIB(AP001918)_1__AP001918	IncFIC(FII)_1__AP001918	IncFII_1__AY458016	IncFII(29)_1__CP003035	IncFII(pCoo)_1__CR942285	IncFII(pSE11)_1__AP009242				IncI(Gamma)_1__AP011954	IncI1-I(Gamma)_1__AP005147			IncQ1_1__M28829									IncA_1__FJ705807	IncC_1__JN157804		Col440I_1__CP023920												IncY_1__K02380							A
ECL19373	Col(pHAD28)_1__KU674895				IncFIB(AP001918)_1__AP001918	IncFIC(FII)_1__AP001918	IncFII_1__AY458016	IncFII(29)_1__CP003035	IncFII(pCoo)_1__CR942285	IncFII(pSE11)_1__AP009242				IncI(Gamma)_1__AP011954	IncI1-I(Gamma)_1__AP005147										IncX1_1__EU370913					Col440I_1__CP023920																			A
ECL19390	Col(pHAD28)_1__KU674895				IncFIB(AP001918)_1__AP001918	IncFIC(FII)_1__AP001918	IncFII_1__AY458016	IncFII(29)_1__CP003035	IncFII(pCoo)_1__CR942285	IncFII(pSE11)_1__AP009242				IncI(Gamma)_1__AP011954	IncI1-I(Gamma)_1__AP005147									IncFII(pSFO)_1__AF401292	IncX1_1__EU370913					Col440I_1__CP023920						IncFII(pHN7A8)_1__JN232517													A
ECL19414	Col(pHAD28)_1__KU674895				IncFIB(AP001918)_1__AP001918	IncFIC(FII)_1__AP001918	IncFII_1__AY458016	IncFII(29)_1__CP003035	IncFII(pCoo)_1__CR942285	IncFII(pSE11)_1__AP009242				IncI(Gamma)_1__AP011954	IncI1-I(Gamma)_1__AP005147									IncFII(pSFO)_1__AF401292	IncX1_1__EU370913					Col440I_1__CP023920						IncFII(pHN7A8)_1__JN232517													A
ECL19427	Col(pHAD28)_1__KU674895				IncFIB(AP001918)_1__AP001918		IncFII_1__AY458016	IncFII(29)_1__CP003035	IncFII(pCoo)_1__CR942285	IncFII(pSE11)_1__AP009242				IncI(Gamma)_1__AP011954	IncI1-I(Gamma)_1__AP005147									IncFII(pSFO)_1__AF401292	IncX1_1__EU370913					Col440I_1__CP023920						IncFII(pHN7A8)_1__JN232517													A
ECL19555	Col(pHAD28)_1__KU674895		IncB/O/K/Z_2__GU256641		IncFIB(AP001918)_1__AP001918	IncFIC(FII)_1__AP001918	IncFII_1__AY458016	IncFII(29)_1__CP003035	IncFII(pCoo)_1__CR942285	IncFII(pSE11)_1__AP009242				IncI(Gamma)_1__AP011954	IncI1-I(Gamma)_1__AP005147			IncQ1_1__M28829												Col440I_1__CP023920												IncY_1__K02380							A
ECL19751	Col(pHAD28)_1__KU674895				IncFIB(AP001918)_1__AP001918	IncFIC(FII)_1__AP001918	IncFII_1__AY458016	IncFII(29)_1__CP003035	IncFII(pCoo)_1__CR942285	IncFII(pSE11)_1__AP009242				IncI(Gamma)_1__AP011954	IncI1-I(Gamma)_1__AP005147				IncFIB(K)_1__JN233704	IncFIB(K)(pCAV1099-114)_1__CP011596				IncFII(pSFO)_1__AF401292	IncX1_1__EU370913					Col440I_1__CP023920						IncFII(pHN7A8)_1__JN232517						IncY_1__K02380							A
ECL19755	Col(pHAD28)_1__KU674895				IncFIB(AP001918)_1__AP001918	IncFIC(FII)_1__AP001918	IncFII_1__AY458016	IncFII(29)_1__CP003035	IncFII(pCoo)_1__CR942285	IncFII(pSE11)_1__AP009242				IncI(Gamma)_1__AP011954	IncI1-I(Gamma)_1__AP005147												IncA_1__FJ705807	IncC_1__JN157804		Col440I_1__CP023920									IncX4_2__FN543504				p0111_1__AP010962						A
ECL19763	Col(pHAD28)_1__KU674895				IncFIB(AP001918)_1__AP001918	IncFIC(FII)_1__AP001918	IncFII_1__AY458016	IncFII(29)_1__CP003035	IncFII(pCoo)_1__CR942285	IncFII(pSE11)_1__AP009242				IncI(Gamma)_1__AP011954	IncI1-I(Gamma)_1__AP005147	IncI2_1__KP347127	IncI2(Delta)_1__AP002527	IncQ1_1__M28829						IncFII(pSFO)_1__AF401292					Col(MG828)_1__NC_008486	Col440I_1__CP023920						IncFII(pHN7A8)_1__JN232517													A
ECL19885	Col(pHAD28)_1__KU674895				IncFIB(AP001918)_1__AP001918	IncFIC(FII)_1__AP001918	IncFII_1__AY458016	IncFII(29)_1__CP003035	IncFII(pCoo)_1__CR942285	IncFII(pSE11)_1__AP009242				IncI(Gamma)_1__AP011954	IncI1-I(Gamma)_1__AP005147									IncFII(pSFO)_1__AF401292	IncX1_1__EU370913					Col440I_1__CP023920						IncFII(pHN7A8)_1__JN232517													A
ECL20408	Col(pHAD28)_1__KU674895		IncB/O/K/Z_2__GU256641		IncFIB(AP001918)_1__AP001918	IncFIC(FII)_1__AP001918	IncFII_1__AY458016	IncFII(29)_1__CP003035	IncFII(pCoo)_1__CR942285	IncFII(pSE11)_1__AP009242				IncI(Gamma)_1__AP011954	IncI1-I(Gamma)_1__AP005147											Col156_1__NC_009781				Col440I_1__CP023920												IncY_1__K02380							A
ECL20721	Col(pHAD28)_1__KU674895		IncB/O/K/Z_2__GU256641															IncQ1_1__M28829												Col440I_1__CP023920																			A
ECL20906	Col(pHAD28)_1__KU674895				IncFIB(AP001918)_1__AP001918	IncFIC(FII)_1__AP001918	IncFII_1__AY458016	IncFII(29)_1__CP003035	IncFII(pCoo)_1__CR942285	IncFII(pSE11)_1__AP009242				IncI(Gamma)_1__AP011954	IncI1-I(Gamma)_1__AP005147						IncN_1__AY046276			IncFII(pSFO)_1__AF401292						Col440I_1__CP023920				ColRNAI_1__DQ298019		IncFII(pHN7A8)_1__JN232517						IncY_1__K02380							A
ECL21415	Col(pHAD28)_1__KU674895																																																A
ECL21975	Col(pHAD28)_1__KU674895				IncFIB(AP001918)_1__AP001918		IncFII_1__AY458016	IncFII(29)_1__CP003035	IncFII(pCoo)_1__CR942285	IncFII(pSE11)_1__AP009242				IncI(Gamma)_1__AP011954	IncI1-I(Gamma)_1__AP005147						IncN_1__AY046276						IncA_1__FJ705807	IncC_1__JN157804		Col440I_1__CP023920																			A
SRR11045320	Col(pHAD28)_1__KU674895				IncFIB(AP001918)_1__AP001918	IncFIC(FII)_1__AP001918	IncFII_1__AY458016	IncFII(29)_1__CP003035	IncFII(pCoo)_1__CR942285	IncFII(pSE11)_1__AP009242				IncI(Gamma)_1__AP011954	IncI1-I(Gamma)_1__AP005147				IncFIB(K)_1__JN233704	IncFIB(K)(pCAV1099-114)_1__CP011596	IncN_1__AY046276																												A
SRR11045323	Col(pHAD28)_1__KU674895				IncFIB(AP001918)_1__AP001918	IncFIC(FII)_1__AP001918	IncFII_1__AY458016	IncFII(29)_1__CP003035	IncFII(pCoo)_1__CR942285	IncFII(pSE11)_1__AP009242				IncI(Gamma)_1__AP011954	IncI1-I(Gamma)_1__AP005147				IncFIB(K)_1__JN233704	IncFIB(K)(pCAV1099-114)_1__CP011596																													A
SRR11045324	Col(pHAD28)_1__KU674895				IncFIB(AP001918)_1__AP001918	IncFIC(FII)_1__AP001918	IncFII_1__AY458016	IncFII(29)_1__CP003035	IncFII(pCoo)_1__CR942285	IncFII(pSE11)_1__AP009242				IncI(Gamma)_1__AP011954	IncI1-I(Gamma)_1__AP005147				IncFIB(K)_1__JN233704	IncFIB(K)(pCAV1099-114)_1__CP011596																													A
SRR11046294	Col(pHAD28)_1__KU674895				IncFIB(AP001918)_1__AP001918	IncFIC(FII)_1__AP001918	IncFII_1__AY458016	IncFII(29)_1__CP003035	IncFII(pCoo)_1__CR942285	IncFII(pSE11)_1__AP009242				IncI(Gamma)_1__AP011954	IncI1-I(Gamma)_1__AP005147				IncFIB(K)_1__JN233704	IncFIB(K)(pCAV1099-114)_1__CP011596		IncR_1__DQ449578																											A
SRR11046297	Col(pHAD28)_1__KU674895				IncFIB(AP001918)_1__AP001918	IncFIC(FII)_1__AP001918	IncFII_1__AY458016	IncFII(29)_1__CP003035	IncFII(pCoo)_1__CR942285	IncFII(pSE11)_1__AP009242				IncI(Gamma)_1__AP011954	IncI1-I(Gamma)_1__AP005147				IncFIB(K)_1__JN233704	IncFIB(K)(pCAV1099-114)_1__CP011596																													A
SRR11046300	Col(pHAD28)_1__KU674895				IncFIB(AP001918)_1__AP001918	IncFIC(FII)_1__AP001918	IncFII_1__AY458016	IncFII(29)_1__CP003035	IncFII(pCoo)_1__CR942285	IncFII(pSE11)_1__AP009242				IncI(Gamma)_1__AP011954	IncI1-I(Gamma)_1__AP005147				IncFIB(K)_1__JN233704	IncFIB(K)(pCAV1099-114)_1__CP011596																													A
SRR11046301	Col(pHAD28)_1__KU674895				IncFIB(AP001918)_1__AP001918	IncFIC(FII)_1__AP001918	IncFII_1__AY458016	IncFII(29)_1__CP003035	IncFII(pCoo)_1__CR942285	IncFII(pSE11)_1__AP009242				IncI(Gamma)_1__AP011954	IncI1-I(Gamma)_1__AP005147				IncFIB(K)_1__JN233704	IncFIB(K)(pCAV1099-114)_1__CP011596	IncN_1__AY046276																												A
SRR11046303	Col(pHAD28)_1__KU674895				IncFIB(AP001918)_1__AP001918	IncFIC(FII)_1__AP001918	IncFII_1__AY458016	IncFII(29)_1__CP003035	IncFII(pCoo)_1__CR942285	IncFII(pSE11)_1__AP009242				IncI(Gamma)_1__AP011954	IncI1-I(Gamma)_1__AP005147				IncFIB(K)_1__JN233704	IncFIB(K)(pCAV1099-114)_1__CP011596			IncFII(pRSB107)_1__AJ851089	IncFII(pSFO)_1__AF401292	IncX1_1__EU370913																								A
SRR11046874	Col(pHAD28)_1__KU674895				IncFIB(AP001918)_1__AP001918	IncFIC(FII)_1__AP001918	IncFII_1__AY458016	IncFII(29)_1__CP003035	IncFII(pCoo)_1__CR942285	IncFII(pSE11)_1__AP009242				IncI(Gamma)_1__AP011954	IncI1-I(Gamma)_1__AP005147				IncFIB(K)_1__JN233704	IncFIB(K)(pCAV1099-114)_1__CP011596																													A
SRR11046875	Col(pHAD28)_1__KU674895				IncFIB(AP001918)_1__AP001918	IncFIC(FII)_1__AP001918	IncFII_1__AY458016	IncFII(29)_1__CP003035	IncFII(pCoo)_1__CR942285	IncFII(pSE11)_1__AP009242				IncI(Gamma)_1__AP011954	IncI1-I(Gamma)_1__AP005147				IncFIB(K)_1__JN233704	IncFIB(K)(pCAV1099-114)_1__CP011596																													A
SRR11046877	Col(pHAD28)_1__KU674895				IncFIB(AP001918)_1__AP001918		IncFII_1__AY458016	IncFII(29)_1__CP003035	IncFII(pCoo)_1__CR942285	IncFII(pSE11)_1__AP009242				IncI(Gamma)_1__AP011954	IncI1-I(Gamma)_1__AP005147				IncFIB(K)_1__JN233704	IncFIB(K)(pCAV1099-114)_1__CP011596						Col156_1__NC_009781																							A
SRR11046878	Col(pHAD28)_1__KU674895				IncFIB(AP001918)_1__AP001918	IncFIC(FII)_1__AP001918	IncFII_1__AY458016	IncFII(29)_1__CP003035	IncFII(pCoo)_1__CR942285	IncFII(pSE11)_1__AP009242				IncI(Gamma)_1__AP011954	IncI1-I(Gamma)_1__AP005147				IncFIB(K)_1__JN233704	IncFIB(K)(pCAV1099-114)_1__CP011596							IncA_1__FJ705807	IncC_1__JN157804																					A
SRR11047446	Col(pHAD28)_1__KU674895	FIA(pBK30683)_1__KF954760			IncFIB(AP001918)_1__AP001918	IncFIC(FII)_1__AP001918	IncFII_1__AY458016	IncFII(29)_1__CP003035	IncFII(pCoo)_1__CR942285	IncFII(pSE11)_1__AP009242				IncI(Gamma)_1__AP011954	IncI1-I(Gamma)_1__AP005147										IncX1_1__EU370913		IncA_1__FJ705807	IncC_1__JN157804	Col(MG828)_1__NC_008486	Col440I_1__CP023920	IncFIA_1__AP001918																		A
SRR11048585	Col(pHAD28)_1__KU674895					IncFIC(FII)_1__AP001918	IncFII_1__AY458016	IncFII(29)_1__CP003035	IncFII(pCoo)_1__CR942285	IncFII(pSE11)_1__AP009242				IncI(Gamma)_1__AP011954	IncI1-I(Gamma)_1__AP005147																	IncHI2_1__BX664015	IncHI2A_1__BX664015																A
SRR11048588	Col(pHAD28)_1__KU674895						IncFII_1__AY458016	IncFII(29)_1__CP003035	IncFII(pCoo)_1__CR942285	IncFII(pSE11)_1__AP009242				IncI(Gamma)_1__AP011954	IncI1-I(Gamma)_1__AP005147			IncQ1_1__M28829	IncFIB(K)_1__JN233704	IncFIB(K)(pCAV1099-114)_1__CP011596																													A
SRR11048592	Col(pHAD28)_1__KU674895				IncFIB(AP001918)_1__AP001918	IncFIC(FII)_1__AP001918	IncFII_1__AY458016	IncFII(29)_1__CP003035	IncFII(pCoo)_1__CR942285	IncFII(pSE11)_1__AP009242				IncI(Gamma)_1__AP011954	IncI1-I(Gamma)_1__AP005147												IncA_1__FJ705807	IncC_1__JN157804		Col440I_1__CP023920				ColRNAI_1__DQ298019															A
SRR11048595	Col(pHAD28)_1__KU674895				IncFIB(AP001918)_1__AP001918	IncFIC(FII)_1__AP001918	IncFII_1__AY458016	IncFII(29)_1__CP003035	IncFII(pCoo)_1__CR942285	IncFII(pSE11)_1__AP009242				IncI(Gamma)_1__AP011954	IncI1-I(Gamma)_1__AP005147				IncFIB(K)_1__JN233704	IncFIB(K)(pCAV1099-114)_1__CP011596																													A
SRR11048596	Col(pHAD28)_1__KU674895				IncFIB(AP001918)_1__AP001918	IncFIC(FII)_1__AP001918	IncFII_1__AY458016	IncFII(29)_1__CP003035	IncFII(pCoo)_1__CR942285	IncFII(pSE11)_1__AP009242				IncI(Gamma)_1__AP011954	IncI1-I(Gamma)_1__AP005147				IncFIB(K)_1__JN233704	IncFIB(K)(pCAV1099-114)_1__CP011596																													A
SRR11074150	Col(pHAD28)_1__KU674895				IncFIB(AP001918)_1__AP001918	IncFIC(FII)_1__AP001918	IncFII_1__AY458016	IncFII(29)_1__CP003035	IncFII(pCoo)_1__CR942285	IncFII(pSE11)_1__AP009242				IncI(Gamma)_1__AP011954	IncI1-I(Gamma)_1__AP005147				IncFIB(K)_1__JN233704	IncFIB(K)(pCAV1099-114)_1__CP011596																													A
SRR11074152	Col(pHAD28)_1__KU674895				IncFIB(AP001918)_1__AP001918	IncFIC(FII)_1__AP001918	IncFII_1__AY458016	IncFII(29)_1__CP003035	IncFII(pCoo)_1__CR942285	IncFII(pSE11)_1__AP009242				IncI(Gamma)_1__AP011954	IncI1-I(Gamma)_1__AP005147	IncI2_1__KP347127	IncI2(Delta)_1__AP002527		IncFIB(K)_1__JN233704	IncFIB(K)(pCAV1099-114)_1__CP011596			IncFII(pRSB107)_1__AJ851089	IncFII(pSFO)_1__AF401292	IncX1_1__EU370913		IncA_1__FJ705807	IncC_1__JN157804																					A
SRR11074153	Col(pHAD28)_1__KU674895				IncFIB(AP001918)_1__AP001918	IncFIC(FII)_1__AP001918	IncFII_1__AY458016	IncFII(29)_1__CP003035	IncFII(pCoo)_1__CR942285	IncFII(pSE11)_1__AP009242				IncI(Gamma)_1__AP011954	IncI1-I(Gamma)_1__AP005147				IncFIB(K)_1__JN233704	IncFIB(K)(pCAV1099-114)_1__CP011596																													A
SRR11074174	Col(pHAD28)_1__KU674895				IncFIB(AP001918)_1__AP001918	IncFIC(FII)_1__AP001918	IncFII_1__AY458016	IncFII(29)_1__CP003035	IncFII(pCoo)_1__CR942285	IncFII(pSE11)_1__AP009242				IncI(Gamma)_1__AP011954	IncI1-I(Gamma)_1__AP005147				IncFIB(K)_1__JN233704	IncFIB(K)(pCAV1099-114)_1__CP011596																													A
SRR11074676	Col(pHAD28)_1__KU674895				IncFIB(AP001918)_1__AP001918	IncFIC(FII)_1__AP001918	IncFII_1__AY458016	IncFII(29)_1__CP003035	IncFII(pCoo)_1__CR942285	IncFII(pSE11)_1__AP009242				IncI(Gamma)_1__AP011954	IncI1-I(Gamma)_1__AP005147				IncFIB(K)_1__JN233704	IncFIB(K)(pCAV1099-114)_1__CP011596	IncN_1__AY046276								Col(MG828)_1__NC_008486	Col440I_1__CP023920																			A
SRR11074677	Col(pHAD28)_1__KU674895				IncFIB(AP001918)_1__AP001918	IncFIC(FII)_1__AP001918	IncFII_1__AY458016	IncFII(29)_1__CP003035	IncFII(pCoo)_1__CR942285	IncFII(pSE11)_1__AP009242				IncI(Gamma)_1__AP011954	IncI1-I(Gamma)_1__AP005147				IncFIB(K)_1__JN233704	IncFIB(K)(pCAV1099-114)_1__CP011596																													A
SRR11074679	Col(pHAD28)_1__KU674895				IncFIB(AP001918)_1__AP001918	IncFIC(FII)_1__AP001918	IncFII_1__AY458016	IncFII(29)_1__CP003035	IncFII(pCoo)_1__CR942285	IncFII(pSE11)_1__AP009242				IncI(Gamma)_1__AP011954	IncI1-I(Gamma)_1__AP005147				IncFIB(K)_1__JN233704	IncFIB(K)(pCAV1099-114)_1__CP011596																													A
SRR11074680	Col(pHAD28)_1__KU674895				IncFIB(AP001918)_1__AP001918	IncFIC(FII)_1__AP001918	IncFII_1__AY458016	IncFII(29)_1__CP003035	IncFII(pCoo)_1__CR942285	IncFII(pSE11)_1__AP009242				IncI(Gamma)_1__AP011954	IncI1-I(Gamma)_1__AP005147				IncFIB(K)_1__JN233704	IncFIB(K)(pCAV1099-114)_1__CP011596																													A
SRR11074681	Col(pHAD28)_1__KU674895				IncFIB(AP001918)_1__AP001918	IncFIC(FII)_1__AP001918	IncFII_1__AY458016	IncFII(29)_1__CP003035	IncFII(pCoo)_1__CR942285	IncFII(pSE11)_1__AP009242				IncI(Gamma)_1__AP011954	IncI1-I(Gamma)_1__AP005147				IncFIB(K)_1__JN233704	IncFIB(K)(pCAV1099-114)_1__CP011596			IncFII(pRSB107)_1__AJ851089	IncFII(pSFO)_1__AF401292	IncX1_1__EU370913																								A
SRR11074684	Col(pHAD28)_1__KU674895				IncFIB(AP001918)_1__AP001918	IncFIC(FII)_1__AP001918	IncFII_1__AY458016	IncFII(29)_1__CP003035	IncFII(pCoo)_1__CR942285	IncFII(pSE11)_1__AP009242				IncI(Gamma)_1__AP011954	IncI1-I(Gamma)_1__AP005147												IncA_1__FJ705807	IncC_1__JN157804																					A
SRR11074686	Col(pHAD28)_1__KU674895				IncFIB(AP001918)_1__AP001918	IncFIC(FII)_1__AP001918	IncFII_1__AY458016	IncFII(29)_1__CP003035	IncFII(pCoo)_1__CR942285	IncFII(pSE11)_1__AP009242				IncI(Gamma)_1__AP011954	IncI1-I(Gamma)_1__AP005147				IncFIB(K)_1__JN233704	IncFIB(K)(pCAV1099-114)_1__CP011596							IncA_1__FJ705807	IncC_1__JN157804																					A
SRR11074688	Col(pHAD28)_1__KU674895				IncFIB(AP001918)_1__AP001918	IncFIC(FII)_1__AP001918	IncFII_1__AY458016	IncFII(29)_1__CP003035	IncFII(pCoo)_1__CR942285	IncFII(pSE11)_1__AP009242				IncI(Gamma)_1__AP011954	IncI1-I(Gamma)_1__AP005147				IncFIB(K)_1__JN233704	IncFIB(K)(pCAV1099-114)_1__CP011596																													A
SRR11074697	Col(pHAD28)_1__KU674895						IncFII_1__AY458016	IncFII(29)_1__CP003035	IncFII(pCoo)_1__CR942285	IncFII(pSE11)_1__AP009242				IncI(Gamma)_1__AP011954	IncI1-I(Gamma)_1__AP005147				IncFIB(K)_1__JN233704	IncFIB(K)(pCAV1099-114)_1__CP011596			IncFII(pRSB107)_1__AJ851089	IncFII(pSFO)_1__AF401292			IncA_1__FJ705807	IncC_1__JN157804							IncX3_1__JN247852														A
SRR11074704	Col(pHAD28)_1__KU674895	FIA(pBK30683)_1__KF954760			IncFIB(AP001918)_1__AP001918	IncFIC(FII)_1__AP001918	IncFII_1__AY458016	IncFII(29)_1__CP003035	IncFII(pCoo)_1__CR942285	IncFII(pSE11)_1__AP009242				IncI(Gamma)_1__AP011954	IncI1-I(Gamma)_1__AP005147				IncFIB(K)_1__JN233704	IncFIB(K)(pCAV1099-114)_1__CP011596											IncFIA_1__AP001918																		A
SRR11074708	Col(pHAD28)_1__KU674895				IncFIB(AP001918)_1__AP001918	IncFIC(FII)_1__AP001918	IncFII_1__AY458016	IncFII(29)_1__CP003035	IncFII(pCoo)_1__CR942285	IncFII(pSE11)_1__AP009242				IncI(Gamma)_1__AP011954	IncI1-I(Gamma)_1__AP005147				IncFIB(K)_1__JN233704	IncFIB(K)(pCAV1099-114)_1__CP011596							IncA_1__FJ705807	IncC_1__JN157804																					A
SRR11074710	Col(pHAD28)_1__KU674895				IncFIB(AP001918)_1__AP001918	IncFIC(FII)_1__AP001918	IncFII_1__AY458016	IncFII(29)_1__CP003035	IncFII(pCoo)_1__CR942285	IncFII(pSE11)_1__AP009242				IncI(Gamma)_1__AP011954	IncI1-I(Gamma)_1__AP005147				IncFIB(K)_1__JN233704	IncFIB(K)(pCAV1099-114)_1__CP011596																													A
SRR11074716	Col(pHAD28)_1__KU674895						IncFII_1__AY458016	IncFII(29)_1__CP003035	IncFII(pCoo)_1__CR942285	IncFII(pSE11)_1__AP009242				IncI(Gamma)_1__AP011954	IncI1-I(Gamma)_1__AP005147				IncFIB(K)_1__JN233704	IncFIB(K)(pCAV1099-114)_1__CP011596									Col(MG828)_1__NC_008486					ColRNAI_1__DQ298019															A
SRR6121969	Col(pHAD28)_1__KU674895						IncFII_1__AY458016	IncFII(29)_1__CP003035	IncFII(pCoo)_1__CR942285	IncFII(pSE11)_1__AP009242				IncI(Gamma)_1__AP011954	IncI1-I(Gamma)_1__AP005147				IncFIB(K)_1__JN233704	IncFIB(K)(pCAV1099-114)_1__CP011596																													A
SRR7213569	Col(pHAD28)_1__KU674895				IncFIB(AP001918)_1__AP001918	IncFIC(FII)_1__AP001918	IncFII_1__AY458016	IncFII(29)_1__CP003035	IncFII(pCoo)_1__CR942285	IncFII(pSE11)_1__AP009242				IncI(Gamma)_1__AP011954	IncI1-I(Gamma)_1__AP005147				IncFIB(K)_1__JN233704	IncFIB(K)(pCAV1099-114)_1__CP011596						Col156_1__NC_009781	IncA_1__FJ705807	IncC_1__JN157804																					A
SRR7213570	Col(pHAD28)_1__KU674895				IncFIB(AP001918)_1__AP001918	IncFIC(FII)_1__AP001918	IncFII_1__AY458016	IncFII(29)_1__CP003035	IncFII(pCoo)_1__CR942285	IncFII(pSE11)_1__AP009242				IncI(Gamma)_1__AP011954	IncI1-I(Gamma)_1__AP005147				IncFIB(K)_1__JN233704	IncFIB(K)(pCAV1099-114)_1__CP011596																													A
SRR7213571	Col(pHAD28)_1__KU674895				IncFIB(AP001918)_1__AP001918	IncFIC(FII)_1__AP001918	IncFII_1__AY458016	IncFII(29)_1__CP003035	IncFII(pCoo)_1__CR942285	IncFII(pSE11)_1__AP009242				IncI(Gamma)_1__AP011954	IncI1-I(Gamma)_1__AP005147				IncFIB(K)_1__JN233704	IncFIB(K)(pCAV1099-114)_1__CP011596			IncFII(pRSB107)_1__AJ851089	IncFII(pSFO)_1__AF401292		Col156_1__NC_009781			Col(MG828)_1__NC_008486					ColRNAI_1__DQ298019															A
SRR7213572	Col(pHAD28)_1__KU674895				IncFIB(AP001918)_1__AP001918	IncFIC(FII)_1__AP001918	IncFII_1__AY458016	IncFII(29)_1__CP003035	IncFII(pCoo)_1__CR942285	IncFII(pSE11)_1__AP009242				IncI(Gamma)_1__AP011954	IncI1-I(Gamma)_1__AP005147									IncFII(pSFO)_1__AF401292			IncA_1__FJ705807	IncC_1__JN157804		Col440I_1__CP023920					IncX3_1__JN247852	IncFII(pHN7A8)_1__JN232517													A
SRR7213573	Col(pHAD28)_1__KU674895				IncFIB(AP001918)_1__AP001918	IncFIC(FII)_1__AP001918	IncFII_1__AY458016	IncFII(29)_1__CP003035	IncFII(pCoo)_1__CR942285	IncFII(pSE11)_1__AP009242				IncI(Gamma)_1__AP011954	IncI1-I(Gamma)_1__AP005147				IncFIB(K)_1__JN233704	IncFIB(K)(pCAV1099-114)_1__CP011596																													A
SRR7213575	Col(pHAD28)_1__KU674895				IncFIB(AP001918)_1__AP001918	IncFIC(FII)_1__AP001918	IncFII_1__AY458016	IncFII(29)_1__CP003035	IncFII(pCoo)_1__CR942285	IncFII(pSE11)_1__AP009242				IncI(Gamma)_1__AP011954	IncI1-I(Gamma)_1__AP005147				IncFIB(K)_1__JN233704	IncFIB(K)(pCAV1099-114)_1__CP011596																													A
SRR7213576	Col(pHAD28)_1__KU674895				IncFIB(AP001918)_1__AP001918	IncFIC(FII)_1__AP001918	IncFII_1__AY458016	IncFII(29)_1__CP003035	IncFII(pCoo)_1__CR942285	IncFII(pSE11)_1__AP009242				IncI(Gamma)_1__AP011954	IncI1-I(Gamma)_1__AP005147				IncFIB(K)_1__JN233704	IncFIB(K)(pCAV1099-114)_1__CP011596																													A
SRR7213578	Col(pHAD28)_1__KU674895				IncFIB(AP001918)_1__AP001918	IncFIC(FII)_1__AP001918	IncFII_1__AY458016	IncFII(29)_1__CP003035	IncFII(pCoo)_1__CR942285	IncFII(pSE11)_1__AP009242				IncI(Gamma)_1__AP011954	IncI1-I(Gamma)_1__AP005147				IncFIB(K)_1__JN233704	IncFIB(K)(pCAV1099-114)_1__CP011596																													A
SRR7213579	Col(pHAD28)_1__KU674895				IncFIB(AP001918)_1__AP001918	IncFIC(FII)_1__AP001918	IncFII_1__AY458016	IncFII(29)_1__CP003035	IncFII(pCoo)_1__CR942285	IncFII(pSE11)_1__AP009242				IncI(Gamma)_1__AP011954	IncI1-I(Gamma)_1__AP005147				IncFIB(K)_1__JN233704	IncFIB(K)(pCAV1099-114)_1__CP011596										Col440I_1__CP023920																			A
SRR7213581	Col(pHAD28)_1__KU674895				IncFIB(AP001918)_1__AP001918		IncFII_1__AY458016	IncFII(29)_1__CP003035	IncFII(pCoo)_1__CR942285	IncFII(pSE11)_1__AP009242				IncI(Gamma)_1__AP011954	IncI1-I(Gamma)_1__AP005147				IncFIB(K)_1__JN233704	IncFIB(K)(pCAV1099-114)_1__CP011596						Col156_1__NC_009781																							A
SRR7213583	Col(pHAD28)_1__KU674895				IncFIB(AP001918)_1__AP001918	IncFIC(FII)_1__AP001918	IncFII_1__AY458016	IncFII(29)_1__CP003035	IncFII(pCoo)_1__CR942285	IncFII(pSE11)_1__AP009242				IncI(Gamma)_1__AP011954	IncI1-I(Gamma)_1__AP005147				IncFIB(K)_1__JN233704	IncFIB(K)(pCAV1099-114)_1__CP011596																													A
SRR7213588	Col(pHAD28)_1__KU674895				IncFIB(AP001918)_1__AP001918	IncFIC(FII)_1__AP001918	IncFII_1__AY458016	IncFII(29)_1__CP003035	IncFII(pCoo)_1__CR942285	IncFII(pSE11)_1__AP009242				IncI(Gamma)_1__AP011954	IncI1-I(Gamma)_1__AP005147				IncFIB(K)_1__JN233704	IncFIB(K)(pCAV1099-114)_1__CP011596	IncN_1__AY046276																												A
SRR7213590	Col(pHAD28)_1__KU674895				IncFIB(AP001918)_1__AP001918	IncFIC(FII)_1__AP001918	IncFII_1__AY458016	IncFII(29)_1__CP003035	IncFII(pCoo)_1__CR942285	IncFII(pSE11)_1__AP009242				IncI(Gamma)_1__AP011954	IncI1-I(Gamma)_1__AP005147				IncFIB(K)_1__JN233704	IncFIB(K)(pCAV1099-114)_1__CP011596																													A
SRR7213593	Col(pHAD28)_1__KU674895				IncFIB(AP001918)_1__AP001918	IncFIC(FII)_1__AP001918	IncFII_1__AY458016	IncFII(29)_1__CP003035	IncFII(pCoo)_1__CR942285	IncFII(pSE11)_1__AP009242				IncI(Gamma)_1__AP011954	IncI1-I(Gamma)_1__AP005147																																		A
SRR7213595	Col(pHAD28)_1__KU674895				IncFIB(AP001918)_1__AP001918	IncFIC(FII)_1__AP001918	IncFII_1__AY458016	IncFII(29)_1__CP003035	IncFII(pCoo)_1__CR942285	IncFII(pSE11)_1__AP009242				IncI(Gamma)_1__AP011954	IncI1-I(Gamma)_1__AP005147				IncFIB(K)_1__JN233704	IncFIB(K)(pCAV1099-114)_1__CP011596																													A
SRR7213596	Col(pHAD28)_1__KU674895				IncFIB(AP001918)_1__AP001918	IncFIC(FII)_1__AP001918	IncFII_1__AY458016	IncFII(29)_1__CP003035	IncFII(pCoo)_1__CR942285	IncFII(pSE11)_1__AP009242				IncI(Gamma)_1__AP011954	IncI1-I(Gamma)_1__AP005147				IncFIB(K)_1__JN233704	IncFIB(K)(pCAV1099-114)_1__CP011596							IncA_1__FJ705807	IncC_1__JN157804																					A
SRR7213597	Col(pHAD28)_1__KU674895				IncFIB(AP001918)_1__AP001918	IncFIC(FII)_1__AP001918	IncFII_1__AY458016	IncFII(29)_1__CP003035	IncFII(pCoo)_1__CR942285	IncFII(pSE11)_1__AP009242				IncI(Gamma)_1__AP011954	IncI1-I(Gamma)_1__AP005147				IncFIB(K)_1__JN233704	IncFIB(K)(pCAV1099-114)_1__CP011596																													A
SRR7213598	Col(pHAD28)_1__KU674895				IncFIB(AP001918)_1__AP001918	IncFIC(FII)_1__AP001918	IncFII_1__AY458016	IncFII(29)_1__CP003035	IncFII(pCoo)_1__CR942285	IncFII(pSE11)_1__AP009242				IncI(Gamma)_1__AP011954	IncI1-I(Gamma)_1__AP005147				IncFIB(K)_1__JN233704	IncFIB(K)(pCAV1099-114)_1__CP011596							IncA_1__FJ705807	IncC_1__JN157804																					A
SRR7213599	Col(pHAD28)_1__KU674895				IncFIB(AP001918)_1__AP001918	IncFIC(FII)_1__AP001918	IncFII_1__AY458016	IncFII(29)_1__CP003035	IncFII(pCoo)_1__CR942285	IncFII(pSE11)_1__AP009242				IncI(Gamma)_1__AP011954	IncI1-I(Gamma)_1__AP005147				IncFIB(K)_1__JN233704	IncFIB(K)(pCAV1099-114)_1__CP011596				IncFII(pSFO)_1__AF401292	IncX1_1__EU370913					Col440I_1__CP023920							IncFIB(H89-PhagePlasmid)_1__HG530657												A
SRR7213600	Col(pHAD28)_1__KU674895				IncFIB(AP001918)_1__AP001918	IncFIC(FII)_1__AP001918	IncFII_1__AY458016	IncFII(29)_1__CP003035	IncFII(pCoo)_1__CR942285	IncFII(pSE11)_1__AP009242				IncI(Gamma)_1__AP011954	IncI1-I(Gamma)_1__AP005147				IncFIB(K)_1__JN233704	IncFIB(K)(pCAV1099-114)_1__CP011596																													A
SRR7213602	Col(pHAD28)_1__KU674895				IncFIB(AP001918)_1__AP001918	IncFIC(FII)_1__AP001918	IncFII_1__AY458016	IncFII(29)_1__CP003035	IncFII(pCoo)_1__CR942285	IncFII(pSE11)_1__AP009242				IncI(Gamma)_1__AP011954	IncI1-I(Gamma)_1__AP005147				IncFIB(K)_1__JN233704	IncFIB(K)(pCAV1099-114)_1__CP011596							IncA_1__FJ705807	IncC_1__JN157804																					A
SRR7213603	Col(pHAD28)_1__KU674895				IncFIB(AP001918)_1__AP001918	IncFIC(FII)_1__AP001918	IncFII_1__AY458016	IncFII(29)_1__CP003035	IncFII(pCoo)_1__CR942285	IncFII(pSE11)_1__AP009242				IncI(Gamma)_1__AP011954	IncI1-I(Gamma)_1__AP005147				IncFIB(K)_1__JN233704	IncFIB(K)(pCAV1099-114)_1__CP011596	IncN_1__AY046276																												A
SRR7213606	Col(pHAD28)_1__KU674895				IncFIB(AP001918)_1__AP001918		IncFII_1__AY458016	IncFII(29)_1__CP003035	IncFII(pCoo)_1__CR942285	IncFII(pSE11)_1__AP009242				IncI(Gamma)_1__AP011954	IncI1-I(Gamma)_1__AP005147				IncFIB(K)_1__JN233704	IncFIB(K)(pCAV1099-114)_1__CP011596																		Col440II_1__CP023921											A
SRR7213607	Col(pHAD28)_1__KU674895				IncFIB(AP001918)_1__AP001918	IncFIC(FII)_1__AP001918	IncFII_1__AY458016	IncFII(29)_1__CP003035	IncFII(pCoo)_1__CR942285	IncFII(pSE11)_1__AP009242				IncI(Gamma)_1__AP011954	IncI1-I(Gamma)_1__AP005147				IncFIB(K)_1__JN233704	IncFIB(K)(pCAV1099-114)_1__CP011596										Col440I_1__CP023920																			A
SRR7213608	Col(pHAD28)_1__KU674895				IncFIB(AP001918)_1__AP001918	IncFIC(FII)_1__AP001918	IncFII_1__AY458016	IncFII(29)_1__CP003035	IncFII(pCoo)_1__CR942285	IncFII(pSE11)_1__AP009242				IncI(Gamma)_1__AP011954	IncI1-I(Gamma)_1__AP005147				IncFIB(K)_1__JN233704	IncFIB(K)(pCAV1099-114)_1__CP011596																													A
SRR7213623	Col(pHAD28)_1__KU674895				IncFIB(AP001918)_1__AP001918	IncFIC(FII)_1__AP001918	IncFII_1__AY458016	IncFII(29)_1__CP003035	IncFII(pCoo)_1__CR942285	IncFII(pSE11)_1__AP009242				IncI(Gamma)_1__AP011954	IncI1-I(Gamma)_1__AP005147				IncFIB(K)_1__JN233704	IncFIB(K)(pCAV1099-114)_1__CP011596																													A
SRR7213658	Col(pHAD28)_1__KU674895				IncFIB(AP001918)_1__AP001918	IncFIC(FII)_1__AP001918	IncFII_1__AY458016	IncFII(29)_1__CP003035	IncFII(pCoo)_1__CR942285	IncFII(pSE11)_1__AP009242				IncI(Gamma)_1__AP011954	IncI1-I(Gamma)_1__AP005147			IncQ1_1__M28829	IncFIB(K)_1__JN233704	IncFIB(K)(pCAV1099-114)_1__CP011596							IncA_1__FJ705807	IncC_1__JN157804																					A
SRR7213659	Col(pHAD28)_1__KU674895				IncFIB(AP001918)_1__AP001918	IncFIC(FII)_1__AP001918	IncFII_1__AY458016	IncFII(29)_1__CP003035	IncFII(pCoo)_1__CR942285	IncFII(pSE11)_1__AP009242				IncI(Gamma)_1__AP011954	IncI1-I(Gamma)_1__AP005147				IncFIB(K)_1__JN233704	IncFIB(K)(pCAV1099-114)_1__CP011596				IncFII(pSFO)_1__AF401292						Col440I_1__CP023920				ColRNAI_1__DQ298019															A
SRR7213660	Col(pHAD28)_1__KU674895				IncFIB(AP001918)_1__AP001918	IncFIC(FII)_1__AP001918	IncFII_1__AY458016	IncFII(29)_1__CP003035	IncFII(pCoo)_1__CR942285	IncFII(pSE11)_1__AP009242				IncI(Gamma)_1__AP011954	IncI1-I(Gamma)_1__AP005147				IncFIB(K)_1__JN233704	IncFIB(K)(pCAV1099-114)_1__CP011596							IncA_1__FJ705807	IncC_1__JN157804																					A
SRR8157048	Col(pHAD28)_1__KU674895				IncFIB(AP001918)_1__AP001918	IncFIC(FII)_1__AP001918	IncFII_1__AY458016	IncFII(29)_1__CP003035	IncFII(pCoo)_1__CR942285	IncFII(pSE11)_1__AP009242				IncI(Gamma)_1__AP011954	IncI1-I(Gamma)_1__AP005147									IncFII(pSFO)_1__AF401292	IncX1_1__EU370913					Col440I_1__CP023920						IncFII(pHN7A8)_1__JN232517													A
SRR8901382	Col(pHAD28)_1__KU674895				IncFIB(AP001918)_1__AP001918	IncFIC(FII)_1__AP001918	IncFII_1__AY458016	IncFII(29)_1__CP003035	IncFII(pCoo)_1__CR942285	IncFII(pSE11)_1__AP009242				IncI(Gamma)_1__AP011954	IncI1-I(Gamma)_1__AP005147				IncFIB(K)_1__JN233704	IncFIB(K)(pCAV1099-114)_1__CP011596																													A
SRR8901386	Col(pHAD28)_1__KU674895				IncFIB(AP001918)_1__AP001918	IncFIC(FII)_1__AP001918	IncFII_1__AY458016	IncFII(29)_1__CP003035	IncFII(pCoo)_1__CR942285	IncFII(pSE11)_1__AP009242				IncI(Gamma)_1__AP011954	IncI1-I(Gamma)_1__AP005147																																		A
SRR8901388	Col(pHAD28)_1__KU674895				IncFIB(AP001918)_1__AP001918	IncFIC(FII)_1__AP001918	IncFII_1__AY458016	IncFII(29)_1__CP003035	IncFII(pCoo)_1__CR942285	IncFII(pSE11)_1__AP009242				IncI(Gamma)_1__AP011954	IncI1-I(Gamma)_1__AP005147									IncFII(pSFO)_1__AF401292						Col440I_1__CP023920						IncFII(pHN7A8)_1__JN232517													A
SRR8901392	Col(pHAD28)_1__KU674895				IncFIB(AP001918)_1__AP001918	IncFIC(FII)_1__AP001918	IncFII_1__AY458016	IncFII(29)_1__CP003035	IncFII(pCoo)_1__CR942285	IncFII(pSE11)_1__AP009242				IncI(Gamma)_1__AP011954	IncI1-I(Gamma)_1__AP005147				IncFIB(K)_1__JN233704	IncFIB(K)(pCAV1099-114)_1__CP011596																													A
SRR8901396	Col(pHAD28)_1__KU674895	FIA(pBK30683)_1__KF954760		IncFIA(HI1)_1__AF250878	IncFIB(AP001918)_1__AP001918	IncFIC(FII)_1__AP001918	IncFII_1__AY458016	IncFII(29)_1__CP003035	IncFII(pCoo)_1__CR942285	IncFII(pSE11)_1__AP009242	IncHI1A_1__AF250878	IncHI1B(R27)_1_R27_AF250878	IncHI1B(pNDM-CIT)_1__JX182975	IncI(Gamma)_1__AP011954	IncI1-I(Gamma)_1__AP005147			IncQ1_1__M28829	IncFIB(K)_1__JN233704	IncFIB(K)(pCAV1099-114)_1__CP011596										Col440I_1__CP023920					IncX3_1__JN247852														A
SRR8901397	Col(pHAD28)_1__KU674895				IncFIB(AP001918)_1__AP001918		IncFII_1__AY458016	IncFII(29)_1__CP003035	IncFII(pCoo)_1__CR942285	IncFII(pSE11)_1__AP009242				IncI(Gamma)_1__AP011954	IncI1-I(Gamma)_1__AP005147				IncFIB(K)_1__JN233704	IncFIB(K)(pCAV1099-114)_1__CP011596																													A
SRR8901398	Col(pHAD28)_1__KU674895				IncFIB(AP001918)_1__AP001918		IncFII_1__AY458016	IncFII(29)_1__CP003035	IncFII(pCoo)_1__CR942285	IncFII(pSE11)_1__AP009242				IncI(Gamma)_1__AP011954	IncI1-I(Gamma)_1__AP005147				IncFIB(K)_1__JN233704	IncFIB(K)(pCAV1099-114)_1__CP011596												IncHI2_1__BX664015	IncHI2A_1__BX664015						IncX4_1__CP002895										A
SRR8901402	Col(pHAD28)_1__KU674895				IncFIB(AP001918)_1__AP001918	IncFIC(FII)_1__AP001918	IncFII_1__AY458016	IncFII(29)_1__CP003035	IncFII(pCoo)_1__CR942285	IncFII(pSE11)_1__AP009242				IncI(Gamma)_1__AP011954	IncI1-I(Gamma)_1__AP005147				IncFIB(K)_1__JN233704	IncFIB(K)(pCAV1099-114)_1__CP011596																													A
SRR8901404	Col(pHAD28)_1__KU674895				IncFIB(AP001918)_1__AP001918	IncFIC(FII)_1__AP001918	IncFII_1__AY458016	IncFII(29)_1__CP003035	IncFII(pCoo)_1__CR942285	IncFII(pSE11)_1__AP009242				IncI(Gamma)_1__AP011954	IncI1-I(Gamma)_1__AP005147				IncFIB(K)_1__JN233704	IncFIB(K)(pCAV1099-114)_1__CP011596	IncN_1__AY046276																												A
SRR8901430	Col(pHAD28)_1__KU674895				IncFIB(AP001918)_1__AP001918	IncFIC(FII)_1__AP001918	IncFII_1__AY458016	IncFII(29)_1__CP003035	IncFII(pCoo)_1__CR942285	IncFII(pSE11)_1__AP009242				IncI(Gamma)_1__AP011954	IncI1-I(Gamma)_1__AP005147				IncFIB(K)_1__JN233704	IncFIB(K)(pCAV1099-114)_1__CP011596			IncFII(pRSB107)_1__AJ851089	IncFII(pSFO)_1__AF401292	IncX1_1__EU370913																								A
SRR8901439	Col(pHAD28)_1__KU674895				IncFIB(AP001918)_1__AP001918		IncFII_1__AY458016	IncFII(29)_1__CP003035	IncFII(pCoo)_1__CR942285	IncFII(pSE11)_1__AP009242				IncI(Gamma)_1__AP011954	IncI1-I(Gamma)_1__AP005147	IncI2_1__KP347127	IncI2(Delta)_1__AP002527						IncFII(pRSB107)_1__AJ851089	IncFII(pSFO)_1__AF401292					Col(MG828)_1__NC_008486					ColRNAI_1__DQ298019		IncFII(pHN7A8)_1__JN232517				IncFII(pAMA1167-NDM-5)_1__CP024805									A
SRR8901452	Col(pHAD28)_1__KU674895				IncFIB(AP001918)_1__AP001918	IncFIC(FII)_1__AP001918	IncFII_1__AY458016	IncFII(29)_1__CP003035	IncFII(pCoo)_1__CR942285	IncFII(pSE11)_1__AP009242				IncI(Gamma)_1__AP011954	IncI1-I(Gamma)_1__AP005147												IncA_1__FJ705807	IncC_1__JN157804																					A
SRR9913963	Col(pHAD28)_1__KU674895				IncFIB(AP001918)_1__AP001918		IncFII_1__AY458016	IncFII(29)_1__CP003035	IncFII(pCoo)_1__CR942285	IncFII(pSE11)_1__AP009242				IncI(Gamma)_1__AP011954	IncI1-I(Gamma)_1__AP005147				IncFIB(K)_1__JN233704	IncFIB(K)(pCAV1099-114)_1__CP011596			IncFII(pRSB107)_1__AJ851089																										A
SRR9914120	Col(pHAD28)_1__KU674895				IncFIB(AP001918)_1__AP001918		IncFII_1__AY458016	IncFII(29)_1__CP003035	IncFII(pCoo)_1__CR942285	IncFII(pSE11)_1__AP009242				IncI(Gamma)_1__AP011954	IncI1-I(Gamma)_1__AP005147				IncFIB(K)_1__JN233704	IncFIB(K)(pCAV1099-114)_1__CP011596			IncFII(pRSB107)_1__AJ851089				IncA_1__FJ705807	IncC_1__JN157804																					A
ECL16273	Col(pHAD28)_1__KU674895				IncFIB(AP001918)_1__AP001918		IncFII_1__AY458016	IncFII(29)_1__CP003035	IncFII(pCoo)_1__CR942285	IncFII(pSE11)_1__AP009242				IncI(Gamma)_1__AP011954	IncI1-I(Gamma)_1__AP005147			IncQ1_1__M28829						IncFII(pSFO)_1__AF401292						Col440I_1__CP023920						IncFII(pHN7A8)_1__JN232517													B
ECL17377	Col(pHAD28)_1__KU674895				IncFIB(AP001918)_1__AP001918		IncFII_1__AY458016	IncFII(29)_1__CP003035	IncFII(pCoo)_1__CR942285	IncFII(pSE11)_1__AP009242				IncI(Gamma)_1__AP011954	IncI1-I(Gamma)_1__AP005147									IncFII(pSFO)_1__AF401292						Col440I_1__CP023920						IncFII(pHN7A8)_1__JN232517													B
ECL19602	Col(pHAD28)_1__KU674895				IncFIB(AP001918)_1__AP001918		IncFII_1__AY458016	IncFII(29)_1__CP003035	IncFII(pCoo)_1__CR942285	IncFII(pSE11)_1__AP009242				IncI(Gamma)_1__AP011954	IncI1-I(Gamma)_1__AP005147										IncX1_1__EU370913					Col440I_1__CP023920																			B
ECL19820	Col(pHAD28)_1__KU674895				IncFIB(AP001918)_1__AP001918		IncFII_1__AY458016	IncFII(29)_1__CP003035	IncFII(pCoo)_1__CR942285	IncFII(pSE11)_1__AP009242				IncI(Gamma)_1__AP011954	IncI1-I(Gamma)_1__AP005147									IncFII(pSFO)_1__AF401292						Col440I_1__CP023920						IncFII(pHN7A8)_1__JN232517													B
ECL19931	Col(pHAD28)_1__KU674895	FIA(pBK30683)_1__KF954760					IncFII_1__AY458016	IncFII(29)_1__CP003035	IncFII(pCoo)_1__CR942285	IncFII(pSE11)_1__AP009242				IncI(Gamma)_1__AP011954	IncI1-I(Gamma)_1__AP005147															Col440I_1__CP023920	IncFIA_1__AP001918																		B
ECL19990	Col(pHAD28)_1__KU674895	FIA(pBK30683)_1__KF954760			IncFIB(AP001918)_1__AP001918									IncI(Gamma)_1__AP011954	IncI1-I(Gamma)_1__AP005147															Col440I_1__CP023920	IncFIA_1__AP001918																		B
ECL20797	Col(pHAD28)_1__KU674895				IncFIB(AP001918)_1__AP001918		IncFII_1__AY458016	IncFII(29)_1__CP003035	IncFII(pCoo)_1__CR942285	IncFII(pSE11)_1__AP009242				IncI(Gamma)_1__AP011954	IncI1-I(Gamma)_1__AP005147									IncFII(pSFO)_1__AF401292						Col440I_1__CP023920						IncFII(pHN7A8)_1__JN232517												IncFIB(pLF82-PhagePlasmid)_1__CU638872	B
ECL21756	Col(pHAD28)_1__KU674895				IncFIB(AP001918)_1__AP001918		IncFII_1__AY458016	IncFII(29)_1__CP003035	IncFII(pCoo)_1__CR942285	IncFII(pSE11)_1__AP009242				IncI(Gamma)_1__AP011954	IncI1-I(Gamma)_1__AP005147									IncFII(pSFO)_1__AF401292	IncX1_1__EU370913					Col440I_1__CP023920						IncFII(pHN7A8)_1__JN232517													B
ECL22341	Col(pHAD28)_1__KU674895				IncFIB(AP001918)_1__AP001918		IncFII_1__AY458016	IncFII(29)_1__CP003035	IncFII(pCoo)_1__CR942285	IncFII(pSE11)_1__AP009242				IncI(Gamma)_1__AP011954	IncI1-I(Gamma)_1__AP005147									IncFII(pSFO)_1__AF401292						Col440I_1__CP023920						IncFII(pHN7A8)_1__JN232517													B
ECL22529	Col(pHAD28)_1__KU674895				IncFIB(AP001918)_1__AP001918		IncFII_1__AY458016	IncFII(29)_1__CP003035	IncFII(pCoo)_1__CR942285	IncFII(pSE11)_1__AP009242				IncI(Gamma)_1__AP011954	IncI1-I(Gamma)_1__AP005147									IncFII(pSFO)_1__AF401292						Col440I_1__CP023920						IncFII(pHN7A8)_1__JN232517													B
ECL22653	Col(pHAD28)_1__KU674895				IncFIB(AP001918)_1__AP001918		IncFII_1__AY458016	IncFII(29)_1__CP003035	IncFII(pCoo)_1__CR942285	IncFII(pSE11)_1__AP009242				IncI(Gamma)_1__AP011954	IncI1-I(Gamma)_1__AP005147									IncFII(pSFO)_1__AF401292	IncX1_1__EU370913					Col440I_1__CP023920						IncFII(pHN7A8)_1__JN232517													B
ECL21464	Col(pHAD28)_1__KU674895	FIA(pBK30683)_1__KF954760		IncFIA(HI1)_1__AF250878			IncFII_1__AY458016	IncFII(29)_1__CP003035	IncFII(pCoo)_1__CR942285	IncFII(pSE11)_1__AP009242									IncFIB(K)_1__JN233704	IncFIB(K)(pCAV1099-114)_1__CP011596				IncFII(pSFO)_1__AF401292	IncX1_1__EU370913					Col440I_1__CP023920						IncFII(pHN7A8)_1__JN232517										IncFIB(S)_1__FN432031	IncFIB(pB171)_1__AB024946		C
ECL21732	Col(pHAD28)_1__KU674895						IncFII_1__AY458016	IncFII(29)_1__CP003035	IncFII(pCoo)_1__CR942285	IncFII(pSE11)_1__AP009242									IncFIB(K)_1__JN233704	IncFIB(K)(pCAV1099-114)_1__CP011596				IncFII(pSFO)_1__AF401292	IncX1_1__EU370913					Col440I_1__CP023920						IncFII(pHN7A8)_1__JN232517										IncFIB(S)_1__FN432031	IncFIB(pB171)_1__AB024946		C
ECL22146	Col(pHAD28)_1__KU674895						IncFII_1__AY458016	IncFII(29)_1__CP003035	IncFII(pCoo)_1__CR942285	IncFII(pSE11)_1__AP009242				IncI(Gamma)_1__AP011954	IncI1-I(Gamma)_1__AP005147			IncQ1_1__M28829	IncFIB(K)_1__JN233704	IncFIB(K)(pCAV1099-114)_1__CP011596				IncFII(pSFO)_1__AF401292	IncX1_1__EU370913				Col(MG828)_1__NC_008486	Col440I_1__CP023920						IncFII(pHN7A8)_1__JN232517										IncFIB(S)_1__FN432031	IncFIB(pB171)_1__AB024946		C
ECL22172	Col(pHAD28)_1__KU674895	FIA(pBK30683)_1__KF954760		IncFIA(HI1)_1__AF250878										IncI(Gamma)_1__AP011954	IncI1-I(Gamma)_1__AP005147				IncFIB(K)_1__JN233704	IncFIB(K)(pCAV1099-114)_1__CP011596					IncX1_1__EU370913					Col440I_1__CP023920				ColRNAI_1__DQ298019												IncFIB(S)_1__FN432031	IncFIB(pB171)_1__AB024946		C
ECL22730	Col(pHAD28)_1__KU674895			IncFIA(HI1)_1__AF250878			IncFII_1__AY458016	IncFII(29)_1__CP003035	IncFII(pCoo)_1__CR942285	IncFII(pSE11)_1__AP009242									IncFIB(K)_1__JN233704	IncFIB(K)(pCAV1099-114)_1__CP011596				IncFII(pSFO)_1__AF401292	IncX1_1__EU370913					Col440I_1__CP023920						IncFII(pHN7A8)_1__JN232517										IncFIB(S)_1__FN432031	IncFIB(pB171)_1__AB024946		C
ECL22749	Col(pHAD28)_1__KU674895						IncFII_1__AY458016	IncFII(29)_1__CP003035	IncFII(pCoo)_1__CR942285	IncFII(pSE11)_1__AP009242				IncI(Gamma)_1__AP011954	IncI1-I(Gamma)_1__AP005147				IncFIB(K)_1__JN233704	IncFIB(K)(pCAV1099-114)_1__CP011596				IncFII(pSFO)_1__AF401292	IncX1_1__EU370913					Col440I_1__CP023920						IncFII(pHN7A8)_1__JN232517										IncFIB(S)_1__FN432031	IncFIB(pB171)_1__AB024946		C
ECL22882	Col(pHAD28)_1__KU674895	FIA(pBK30683)_1__KF954760		IncFIA(HI1)_1__AF250878			IncFII_1__AY458016	IncFII(29)_1__CP003035	IncFII(pCoo)_1__CR942285	IncFII(pSE11)_1__AP009242									IncFIB(K)_1__JN233704	IncFIB(K)(pCAV1099-114)_1__CP011596				IncFII(pSFO)_1__AF401292	IncX1_1__EU370913					Col440I_1__CP023920						IncFII(pHN7A8)_1__JN232517										IncFIB(S)_1__FN432031	IncFIB(pB171)_1__AB024946		C
ECL00103	Col(pHAD28)_1__KU674895				IncFIB(AP001918)_1__AP001918		IncFII_1__AY458016	IncFII(29)_1__CP003035	IncFII(pCoo)_1__CR942285	IncFII(pSE11)_1__AP009242				IncI(Gamma)_1__AP011954	IncI1-I(Gamma)_1__AP005147																												p0111_1__AP010962						D
ECL01302	Col(pHAD28)_1__KU674895				IncFIB(AP001918)_1__AP001918		IncFII_1__AY458016	IncFII(29)_1__CP003035	IncFII(pCoo)_1__CR942285	IncFII(pSE11)_1__AP009242				IncI(Gamma)_1__AP011954	IncI1-I(Gamma)_1__AP005147											Col156_1__NC_009781			Col(MG828)_1__NC_008486														p0111_1__AP010962						D
ECL01669							IncFII_1__AY458016	IncFII(29)_1__CP003035	IncFII(pCoo)_1__CR942285	IncFII(pSE11)_1__AP009242				IncI(Gamma)_1__AP011954	IncI1-I(Gamma)_1__AP005147																																		D
ECL02602	Col(pHAD28)_1__KU674895				IncFIB(AP001918)_1__AP001918		IncFII_1__AY458016	IncFII(29)_1__CP003035	IncFII(pCoo)_1__CR942285	IncFII(pSE11)_1__AP009242																				Col440I_1__CP023920																			D
ECL02964					IncFIB(AP001918)_1__AP001918		IncFII_1__AY458016	IncFII(29)_1__CP003035	IncFII(pCoo)_1__CR942285	IncFII(pSE11)_1__AP009242				IncI(Gamma)_1__AP011954	IncI1-I(Gamma)_1__AP005147																												p0111_1__AP010962						D
ECL03391			IncB/O/K/Z_2__GU256641		IncFIB(AP001918)_1__AP001918		IncFII_1__AY458016	IncFII(29)_1__CP003035	IncFII(pCoo)_1__CR942285	IncFII(pSE11)_1__AP009242																				Col440I_1__CP023920				ColRNAI_1__DQ298019									p0111_1__AP010962						D
ECL04323					IncFIB(AP001918)_1__AP001918		IncFII_1__AY458016	IncFII(29)_1__CP003035	IncFII(pCoo)_1__CR942285	IncFII(pSE11)_1__AP009242																																	p0111_1__AP010962						D
ECL04937					IncFIB(AP001918)_1__AP001918		IncFII_1__AY458016	IncFII(29)_1__CP003035	IncFII(pCoo)_1__CR942285	IncFII(pSE11)_1__AP009242																																	p0111_1__AP010962						D
ECL05543					IncFIB(AP001918)_1__AP001918		IncFII_1__AY458016	IncFII(29)_1__CP003035	IncFII(pCoo)_1__CR942285	IncFII(pSE11)_1__AP009242				IncI(Gamma)_1__AP011954	IncI1-I(Gamma)_1__AP005147																												p0111_1__AP010962						D
ECL06007					IncFIB(AP001918)_1__AP001918		IncFII_1__AY458016	IncFII(29)_1__CP003035	IncFII(pCoo)_1__CR942285	IncFII(pSE11)_1__AP009242				IncI(Gamma)_1__AP011954	IncI1-I(Gamma)_1__AP005147																												p0111_1__AP010962						D
ECL07310					IncFIB(AP001918)_1__AP001918		IncFII_1__AY458016	IncFII(29)_1__CP003035	IncFII(pCoo)_1__CR942285	IncFII(pSE11)_1__AP009242																				Col440I_1__CP023920				ColRNAI_1__DQ298019															D
ECL08786					IncFIB(AP001918)_1__AP001918		IncFII_1__AY458016	IncFII(29)_1__CP003035	IncFII(pCoo)_1__CR942285	IncFII(pSE11)_1__AP009242																								ColRNAI_1__DQ298019									p0111_1__AP010962						D
ECL05380	Col(pHAD28)_1__KU674895				IncFIB(AP001918)_1__AP001918	IncFIC(FII)_1__AP001918	IncFII_1__AY458016	IncFII(29)_1__CP003035	IncFII(pCoo)_1__CR942285	IncFII(pSE11)_1__AP009242													IncFII(pRSB107)_1__AJ851089	IncFII(pSFO)_1__AF401292	IncX1_1__EU370913					Col440I_1__CP023920				ColRNAI_1__DQ298019		IncFII(pHN7A8)_1__JN232517				IncFII(pAMA1167-NDM-5)_1__CP024805									E
ECL05958	Col(pHAD28)_1__KU674895				IncFIB(AP001918)_1__AP001918	IncFIC(FII)_1__AP001918	IncFII_1__AY458016	IncFII(29)_1__CP003035	IncFII(pCoo)_1__CR942285	IncFII(pSE11)_1__AP009242																						IncHI2_1__BX664015	IncHI2A_1__BX664015																E
ECL08334		FIA(pBK30683)_1__KF954760		IncFIA(HI1)_1__AF250878	IncFIB(AP001918)_1__AP001918						IncHI1A_1__AF250878	IncHI1B(R27)_1_R27_AF250878	IncHI1B(pNDM-CIT)_1__JX182975																																				E
ECL17896	Col(pHAD28)_1__KU674895				IncFIB(AP001918)_1__AP001918	IncFIC(FII)_1__AP001918	IncFII_1__AY458016	IncFII(29)_1__CP003035	IncFII(pCoo)_1__CR942285	IncFII(pSE11)_1__AP009242				IncI(Gamma)_1__AP011954	IncI1-I(Gamma)_1__AP005147	IncI2_1__KP347127	IncI2(Delta)_1__AP002527									Col156_1__NC_009781			Col(MG828)_1__NC_008486			IncHI2_1__BX664015	IncHI2A_1__BX664015																E
ECL19148	Col(pHAD28)_1__KU674895				IncFIB(AP001918)_1__AP001918	IncFIC(FII)_1__AP001918	IncFII_1__AY458016	IncFII(29)_1__CP003035	IncFII(pCoo)_1__CR942285	IncFII(pSE11)_1__AP009242																			Col(MG828)_1__NC_008486			IncHI2_1__BX664015	IncHI2A_1__BX664015									IncY_1__K02380							E
ECL19153	Col(pHAD28)_1__KU674895				IncFIB(AP001918)_1__AP001918	IncFIC(FII)_1__AP001918	IncFII_1__AY458016	IncFII(29)_1__CP003035	IncFII(pCoo)_1__CR942285	IncFII(pSE11)_1__AP009242																			Col(MG828)_1__NC_008486			IncHI2_1__BX664015	IncHI2A_1__BX664015									IncY_1__K02380							E
ECL19788					IncFIB(AP001918)_1__AP001918	IncFIC(FII)_1__AP001918	IncFII_1__AY458016	IncFII(29)_1__CP003035	IncFII(pCoo)_1__CR942285	IncFII(pSE11)_1__AP009242														IncFII(pSFO)_1__AF401292												IncFII(pHN7A8)_1__JN232517													E
ECL20223					IncFIB(AP001918)_1__AP001918	IncFIC(FII)_1__AP001918	IncFII_1__AY458016	IncFII(29)_1__CP003035	IncFII(pCoo)_1__CR942285	IncFII(pSE11)_1__AP009242				IncI(Gamma)_1__AP011954	IncI1-I(Gamma)_1__AP005147																						IncFIB(H89-PhagePlasmid)_1__HG530657												E
ECL20462	Col(pHAD28)_1__KU674895				IncFIB(AP001918)_1__AP001918	IncFIC(FII)_1__AP001918	IncFII_1__AY458016	IncFII(29)_1__CP003035	IncFII(pCoo)_1__CR942285	IncFII(pSE11)_1__AP009242																																IncY_1__K02380							E
ECL22774	Col(pHAD28)_1__KU674895				IncFIB(AP001918)_1__AP001918	IncFIC(FII)_1__AP001918	IncFII_1__AY458016	IncFII(29)_1__CP003035	IncFII(pCoo)_1__CR942285	IncFII(pSE11)_1__AP009242				IncI(Gamma)_1__AP011954	IncI1-I(Gamma)_1__AP005147																			ColRNAI_1__DQ298019		IncFII(pHN7A8)_1__JN232517	IncFIB(H89-PhagePlasmid)_1__HG530657												E
ECL14672					IncFIB(AP001918)_1__AP001918		IncFII_1__AY458016	IncFII(29)_1__CP003035	IncFII(pCoo)_1__CR942285	IncFII(pSE11)_1__AP009242				IncI(Gamma)_1__AP011954	IncI1-I(Gamma)_1__AP005147								IncFII(pRSB107)_1__AJ851089	IncFII(pSFO)_1__AF401292						Col440I_1__CP023920																			F
ECL21170					IncFIB(AP001918)_1__AP001918											IncI2_1__KP347127	IncI2(Delta)_1__AP002527																																F
ECL01947					IncFIB(AP001918)_1__AP001918	IncFIC(FII)_1__AP001918	IncFII_1__AY458016	IncFII(29)_1__CP003035	IncFII(pCoo)_1__CR942285	IncFII(pSE11)_1__AP009242																																							NA
ECL20395	Col(pHAD28)_1__KU674895						IncFII_1__AY458016	IncFII(29)_1__CP003035	IncFII(pCoo)_1__CR942285	IncFII(pSE11)_1__AP009242																				Col440I_1__CP023920												IncY_1__K02380				IncFIB(S)_1__FN432031	IncFIB(pB171)_1__AB024946		NA
ECL19146	Col(pHAD28)_1__KU674895				IncFIB(AP001918)_1__AP001918	IncFIC(FII)_1__AP001918	IncFII_1__AY458016	IncFII(29)_1__CP003035	IncFII(pCoo)_1__CR942285	IncFII(pSE11)_1__AP009242				IncI(Gamma)_1__AP011954	IncI1-I(Gamma)_1__AP005147									IncFII(pSFO)_1__AF401292						Col440I_1__CP023920						IncFII(pHN7A8)_1__JN232517
[truncated: 1 more columns]
