# Supplementary material for: High Risk Clone: A Proposal of Criteria Adapted to the One Health Context with Application to Enterotoxigenic Escherichia coli in the Pig Population
Source: Antibiotics (Basel). 2021 Feb 28;10(3):244. doi: 10.3390/antibiotics10030244 (PMC8000703; doi:10.3390/antibiotics10030244)
Supplement: Supplementary file 1 [file antibiotics-10-00244-s001.zip › TableS8_BLSE_AmpCgenesresults.xlsx]

## Sheet: bla_total_2
ID_isolate	_Bla_AmpC1	_Bla_AmpC2	_Bla_Penicillin	_Bla_ampH	_Bla_blaTEM	blaTEM	_Bla_blaBIL	_Bla_blaCMY	_Bla_blaLAT	blaCMY	_Bla_blaIMP	blaIMP	_Bla_blaCTX	blaCTX	_Bla_blaSCO	clonal_lineage	clone
ECL00103	(Bla)AmpC1_Ecoli:FN649414:2765051-2766355:1302	(Bla)AmpC2_Ecoli:CP002970:332756-333889:1134	(Bla)Penicillin_Binding_Protein_Ecoli:CP002291:664439-666340:1902	(Bla)ampH_Ecoli:AP012030:395554-396711:1158												D
ECL00351	(Bla)AmpC1_Ecoli:FN649414:2765051-2766355:1302	(Bla)AmpC2_Ecoli:CP002970:332756-333889:1134	(Bla)Penicillin_Binding_Protein_Ecoli:CP002291:664439-666340:1902	(Bla)ampH_Ecoli:AP012030:395554-396711:1158												A	3
ECL00652	(Bla)AmpC1_Ecoli:FN649414:2765051-2766355:1302	(Bla)AmpC2_Ecoli:CP002970:332756-333889:1134	(Bla)Penicillin_Binding_Protein_Ecoli:CP002291:664439-666340:1902	(Bla)ampH_Ecoli:AP012030:395554-396711:1158	(Bla)blaTEM-105:AF516720:215-1075:861	blaTEM-1B_1_AY458016										A	3
ECL01302	(Bla)AmpC1_Ecoli:FN649414:2765051-2766355:1302	(Bla)AmpC2_Ecoli:CP002970:332756-333889:1134	(Bla)Penicillin_Binding_Protein_Ecoli:CP002291:664439-666340:1902	(Bla)ampH_Ecoli:AP012030:395554-396711:1158												D
ECL01669	(Bla)AmpC1_Ecoli:FN649414:2765051-2766355:1302	(Bla)AmpC2_Ecoli:CP002970:332756-333889:1134	(Bla)Penicillin_Binding_Protein_Ecoli:CP002291:664439-666340:1902	(Bla)ampH_Ecoli:AP012030:395554-396711:1158												D
ECL01947	(Bla)AmpC1_Ecoli:FN649414:2765051-2766355:1302	(Bla)AmpC2_Ecoli:CP002970:332756-333889:1134	(Bla)Penicillin_Binding_Protein_Ecoli:CP002291:664439-666340:1902	(Bla)ampH_Ecoli:AP012030:395554-396711:1158												NA
ECL02602	(Bla)AmpC1_Ecoli:FN649414:2765051-2766355:1302	(Bla)AmpC2_Ecoli:CP002970:332756-333889:1134	(Bla)Penicillin_Binding_Protein_Ecoli:CP002291:664439-666340:1902	(Bla)ampH_Ecoli:AP012030:395554-396711:1158												D
ECL02964	(Bla)AmpC1_Ecoli:FN649414:2765051-2766355:1302	(Bla)AmpC2_Ecoli:CP002970:332756-333889:1134	(Bla)Penicillin_Binding_Protein_Ecoli:CP002291:664439-666340:1902	(Bla)ampH_Ecoli:AP012030:395554-396711:1158												D
ECL03391	(Bla)AmpC1_Ecoli:FN649414:2765051-2766355:1302	(Bla)AmpC2_Ecoli:CP002970:332756-333889:1134	(Bla)Penicillin_Binding_Protein_Ecoli:CP002291:664439-666340:1902	(Bla)ampH_Ecoli:AP012030:395554-396711:1158												D
ECL04323	(Bla)AmpC1_Ecoli:FN649414:2765051-2766355:1302	(Bla)AmpC2_Ecoli:CP002970:332756-333889:1134	(Bla)Penicillin_Binding_Protein_Ecoli:CP002291:664439-666340:1902	(Bla)ampH_Ecoli:AP012030:395554-396711:1158												D
ECL04937	(Bla)AmpC1_Ecoli:FN649414:2765051-2766355:1302	(Bla)AmpC2_Ecoli:CP002970:332756-333889:1134	(Bla)Penicillin_Binding_Protein_Ecoli:CP002291:664439-666340:1902	(Bla)ampH_Ecoli:AP012030:395554-396711:1158												D
ECL05380	(Bla)AmpC1_Ecoli:FN649414:2765051-2766355:1302	(Bla)AmpC2_Ecoli:CP002970:332756-333889:1134	(Bla)Penicillin_Binding_Protein_Ecoli:CP002291:664439-666340:1902	(Bla)ampH_Ecoli:AP012030:395554-396711:1158												E
ECL05543	(Bla)AmpC1_Ecoli:FN649414:2765051-2766355:1302	(Bla)AmpC2_Ecoli:CP002970:332756-333889:1134	(Bla)Penicillin_Binding_Protein_Ecoli:CP002291:664439-666340:1902	(Bla)ampH_Ecoli:AP012030:395554-396711:1158												D
ECL05958	(Bla)AmpC1_Ecoli:FN649414:2765051-2766355:1302	(Bla)AmpC2_Ecoli:CP002970:332756-333889:1134	(Bla)Penicillin_Binding_Protein_Ecoli:CP002291:664439-666340:1902	(Bla)ampH_Ecoli:AP012030:395554-396711:1158												E
ECL06007	(Bla)AmpC1_Ecoli:FN649414:2765051-2766355:1302	(Bla)AmpC2_Ecoli:CP002970:332756-333889:1134	(Bla)Penicillin_Binding_Protein_Ecoli:CP002291:664439-666340:1902	(Bla)ampH_Ecoli:AP012030:395554-396711:1158												D
ECL07310	(Bla)AmpC1_Ecoli:FN649414:2765051-2766355:1302	(Bla)AmpC2_Ecoli:CP002970:332756-333889:1134	(Bla)Penicillin_Binding_Protein_Ecoli:CP002291:664439-666340:1902	(Bla)ampH_Ecoli:AP012030:395554-396711:1158												D
ECL07805	(Bla)AmpC1_Ecoli:FN649414:2765051-2766355:1302	(Bla)AmpC2_Ecoli:CP002970:332756-333889:1134	(Bla)Penicillin_Binding_Protein_Ecoli:CP002291:664439-666340:1902	(Bla)ampH_Ecoli:AP012030:395554-396711:1158												A	2
ECL08334	(Bla)AmpC1_Ecoli:FN649414:2765051-2766355:1302	(Bla)AmpC2_Ecoli:CP002970:332756-333889:1134	(Bla)Penicillin_Binding_Protein_Ecoli:CP002291:664439-666340:1902	(Bla)ampH_Ecoli:AP012030:395554-396711:1158	(Bla)blaTEM-105:AF516720:215-1075:861	blaTEM-1B_1_AY458016										E
ECL08786	(Bla)AmpC1_Ecoli:FN649414:2765051-2766355:1302	(Bla)AmpC2_Ecoli:CP002970:332756-333889:1134	(Bla)Penicillin_Binding_Protein_Ecoli:CP002291:664439-666340:1902	(Bla)ampH_Ecoli:AP012030:395554-396711:1158												D
ECL09114	(Bla)AmpC1_Ecoli:FN649414:2765051-2766355:1302	(Bla)AmpC2_Ecoli:CP002970:332756-333889:1134	(Bla)Penicillin_Binding_Protein_Ecoli:CP002291:664439-666340:1902	(Bla)ampH_Ecoli:AP012030:395554-396711:1158	(Bla)blaTEM-105:AF516720:215-1075:861	blaTEM-1B_1_AY458016										A	2
ECL09646	(Bla)AmpC1_Ecoli:FN649414:2765051-2766355:1302	(Bla)AmpC2_Ecoli:CP002970:332756-333889:1134	(Bla)Penicillin_Binding_Protein_Ecoli:CP002291:664439-666340:1902	(Bla)ampH_Ecoli:AP012030:395554-396711:1158												A	3
ECL10170	(Bla)AmpC1_Ecoli:FN649414:2765051-2766355:1302	(Bla)AmpC2_Ecoli:CP002970:332756-333889:1134	(Bla)Penicillin_Binding_Protein_Ecoli:CP002291:664439-666340:1902	(Bla)ampH_Ecoli:AP012030:395554-396711:1158												A	2
ECL10647	(Bla)AmpC1_Ecoli:FN649414:2765051-2766355:1302	(Bla)AmpC2_Ecoli:CP002970:332756-333889:1134	(Bla)Penicillin_Binding_Protein_Ecoli:CP002291:664439-666340:1902	(Bla)ampH_Ecoli:AP012030:395554-396711:1158	(Bla)blaTEM-105:AF516720:215-1075:861	blaTEM-1B_1_AY458016										A	3
ECL11171	(Bla)AmpC1_Ecoli:FN649414:2765051-2766355:1302	(Bla)AmpC2_Ecoli:CP002970:332756-333889:1134	(Bla)Penicillin_Binding_Protein_Ecoli:CP002291:664439-666340:1902	(Bla)ampH_Ecoli:AP012030:395554-396711:1158	(Bla)blaTEM-105:AF516720:215-1075:861	blaTEM-1B_1_AY458016										A	3
ECL11324	(Bla)AmpC1_Ecoli:FN649414:2765051-2766355:1302	(Bla)AmpC2_Ecoli:CP002970:332756-333889:1134	(Bla)Penicillin_Binding_Protein_Ecoli:CP002291:664439-666340:1902	(Bla)ampH_Ecoli:AP012030:395554-396711:1158												A	2
ECL13086	(Bla)AmpC1_Ecoli:FN649414:2765051-2766355:1302	(Bla)AmpC2_Ecoli:CP002970:332756-333889:1134	(Bla)Penicillin_Binding_Protein_Ecoli:CP002291:664439-666340:1902	(Bla)ampH_Ecoli:AP012030:395554-396711:1158	(Bla)blaTEM-105:AF516720:215-1075:861	blaTEM-1B_1_AY458016	(Bla)blaBIL-1:X74512:127-1272:1146	(Bla)blaCMY-111:KJ155695:1-1146:1146	(Bla)blaLAT-1:X78117:122-1287:1146	blaCMY-2_1_X91840						A	2
ECL13345	(Bla)AmpC1_Ecoli:FN649414:2765051-2766355:1302	(Bla)AmpC2_Ecoli:CP002970:332756-333889:1134	(Bla)Penicillin_Binding_Protein_Ecoli:CP002291:664439-666340:1902	(Bla)ampH_Ecoli:AP012030:395554-396711:1158												A	2
ECL14048	(Bla)AmpC1_Ecoli:FN649414:2765051-2766355:1302	(Bla)AmpC2_Ecoli:CP002970:332756-333889:1134	(Bla)Penicillin_Binding_Protein_Ecoli:CP002291:664439-666340:1902	(Bla)ampH_Ecoli:AP012030:395554-396711:1158			(Bla)blaBIL-1:X74512:127-1272:1146	(Bla)blaCMY-111:KJ155695:1-1146:1146	(Bla)blaLAT-1:X78117:122-1287:1146	blaCMY-2_1_X91840						A	3
ECL14672	(Bla)AmpC1_Ecoli:FN649414:2765051-2766355:1302	(Bla)AmpC2_Ecoli:CP002970:332756-333889:1134	(Bla)Penicillin_Binding_Protein_Ecoli:CP002291:664439-666340:1902	(Bla)ampH_Ecoli:AP012030:395554-396711:1158												F
ECL16273	(Bla)AmpC1_Ecoli:FN649414:2765051-2766355:1302	(Bla)AmpC2_Ecoli:CP002970:332756-333889:1134	(Bla)Penicillin_Binding_Protein_Ecoli:CP002291:664439-666340:1902	(Bla)ampH_Ecoli:AP012030:395554-396711:1158												B
ECL17377	(Bla)AmpC1_Ecoli:FN649414:2765051-2766355:1302	(Bla)AmpC2_Ecoli:CP002970:332756-333889:1134	(Bla)Penicillin_Binding_Protein_Ecoli:CP002291:664439-666340:1902	(Bla)ampH_Ecoli:AP012030:395554-396711:1158												B
ECL17896	(Bla)AmpC1_Ecoli:FN649414:2765051-2766355:1302	(Bla)AmpC2_Ecoli:CP002970:332756-333889:1134	(Bla)Penicillin_Binding_Protein_Ecoli:CP002291:664439-666340:1902	(Bla)ampH_Ecoli:AP012030:395554-396711:1158	(Bla)blaTEM-105:AF516720:215-1075:861	blaTEM-1B_1_AY458016	(Bla)blaBIL-1:X74512:127-1272:1146	(Bla)blaCMY-111:KJ155695:1-1146:1146	(Bla)blaLAT-1:X78117:122-1287:1146	blaCMY-2_1_X91840	(Bla)blaIMP-27:JF894248:1-741:741	blaIMP-64_1_KX949735				E
ECL18172	(Bla)AmpC1_Ecoli:FN649414:2765051-2766355:1302	(Bla)AmpC2_Ecoli:CP002970:332756-333889:1134	(Bla)Penicillin_Binding_Protein_Ecoli:CP002291:664439-666340:1902	(Bla)ampH_Ecoli:AP012030:395554-396711:1158												A	2
ECL18573	(Bla)AmpC1_Ecoli:FN649414:2765051-2766355:1302	(Bla)AmpC2_Ecoli:CP002970:332756-333889:1134	(Bla)Penicillin_Binding_Protein_Ecoli:CP002291:664439-666340:1902	(Bla)ampH_Ecoli:AP012030:395554-396711:1158			(Bla)blaBIL-1:X74512:127-1272:1146	(Bla)blaCMY-111:KJ155695:1-1146:1146	(Bla)blaLAT-1:X78117:122-1287:1146	blaCMY-2_1_X91840						A	3
ECL18728	(Bla)AmpC1_Ecoli:FN649414:2765051-2766355:1302	(Bla)AmpC2_Ecoli:CP002970:332756-333889:1134	(Bla)Penicillin_Binding_Protein_Ecoli:CP002291:664439-666340:1902	(Bla)ampH_Ecoli:AP012030:395554-396711:1158	(Bla)blaTEM-105:AF516720:215-1075:861	blaTEM-1B_1_AY458016										A	2
ECL19125	(Bla)AmpC1_Ecoli:FN649414:2765051-2766355:1302	(Bla)AmpC2_Ecoli:CP002970:332756-333889:1134	(Bla)Penicillin_Binding_Protein_Ecoli:CP002291:664439-666340:1902	(Bla)ampH_Ecoli:AP012030:395554-396711:1158	(Bla)blaTEM-105:AF516720:215-1075:861	blaTEM-1B_1_AY458016										A	3
ECL19146	(Bla)AmpC1_Ecoli:FN649414:2765051-2766355:1302	(Bla)AmpC2_Ecoli:CP002970:332756-333889:1134	(Bla)Penicillin_Binding_Protein_Ecoli:CP002291:664439-666340:1902	(Bla)ampH_Ecoli:AP012030:395554-396711:1158
ECL19148	(Bla)AmpC1_Ecoli:FN649414:2765051-2766355:1302	(Bla)AmpC2_Ecoli:CP002970:332756-333889:1134	(Bla)Penicillin_Binding_Protein_Ecoli:CP002291:664439-666340:1902	(Bla)ampH_Ecoli:AP012030:395554-396711:1158	(Bla)blaTEM-105:AF516720:215-1075:861	blaTEM-1B_1_AY458016										E
ECL19153	(Bla)AmpC1_Ecoli:FN649414:2765051-2766355:1302	(Bla)AmpC2_Ecoli:CP002970:332756-333889:1134	(Bla)Penicillin_Binding_Protein_Ecoli:CP002291:664439-666340:1902	(Bla)ampH_Ecoli:AP012030:395554-396711:1158	(Bla)blaTEM-105:AF516720:215-1075:861	blaTEM-1B_1_AY458016										E
ECL19159	(Bla)AmpC1_Ecoli:FN649414:2765051-2766355:1302	(Bla)AmpC2_Ecoli:CP002970:332756-333889:1134	(Bla)Penicillin_Binding_Protein_Ecoli:CP002291:664439-666340:1902	(Bla)ampH_Ecoli:AP012030:395554-396711:1158	(Bla)blaTEM-105:AF516720:215-1075:861	blaTEM-1B_1_AY458016	(Bla)blaBIL-1:X74512:127-1272:1146	(Bla)blaCMY-111:KJ155695:1-1146:1146	(Bla)blaLAT-1:X78117:122-1287:1146	blaCMY-2_1_X91840						A	0
ECL19187	(Bla)AmpC1_Ecoli:FN649414:2765051-2766355:1302	(Bla)AmpC2_Ecoli:CP002970:332756-333889:1134	(Bla)Penicillin_Binding_Protein_Ecoli:CP002291:664439-666340:1902	(Bla)ampH_Ecoli:AP012030:395554-396711:1158			(Bla)blaBIL-1:X74512:127-1272:1146	(Bla)blaCMY-111:KJ155695:1-1146:1146	(Bla)blaLAT-1:X78117:122-1287:1146	blaCMY-2_1_X91840						A	3
ECL19345	(Bla)AmpC1_Ecoli:FN649414:2765051-2766355:1302	(Bla)AmpC2_Ecoli:CP002970:332756-333889:1134	(Bla)Penicillin_Binding_Protein_Ecoli:CP002291:664439-666340:1902	(Bla)ampH_Ecoli:AP012030:395554-396711:1158												A	3
ECL19373	(Bla)AmpC1_Ecoli:FN649414:2765051-2766355:1302	(Bla)AmpC2_Ecoli:CP002970:332756-333889:1134	(Bla)Penicillin_Binding_Protein_Ecoli:CP002291:664439-666340:1902	(Bla)ampH_Ecoli:AP012030:395554-396711:1158	(Bla)blaTEM-150:AM183304:209-1069:861	blaTEM-1A_1_HM749966										A	0
ECL19390	(Bla)AmpC1_Ecoli:FN649414:2765051-2766355:1302	(Bla)AmpC2_Ecoli:CP002970:332756-333889:1134	(Bla)Penicillin_Binding_Protein_Ecoli:CP002291:664439-666340:1902	(Bla)ampH_Ecoli:AP012030:395554-396711:1158	(Bla)blaTEM-105:AF516720:215-1075:861	blaTEM-1B_1_AY458016										A	0
ECL19403	(Bla)AmpC1_Ecoli:FN649414:2765051-2766355:1302	(Bla)AmpC2_Ecoli:CP002970:332756-333889:1134	(Bla)Penicillin_Binding_Protein_Ecoli:CP002291:664439-666340:1902	(Bla)ampH_Ecoli:AP012030:395554-396711:1158	(Bla)blaTEM-122:AY307100:1-861:861	blaTEM-1A_1_HM749966	(Bla)blaBIL-1:X74512:127-1272:1146	(Bla)blaCMY-111:KJ155695:1-1146:1146	(Bla)blaLAT-1:X78117:122-1287:1146	blaCMY-2_1_X91840						A	3
ECL19414	(Bla)AmpC1_Ecoli:FN649414:2765051-2766355:1302	(Bla)AmpC2_Ecoli:CP002970:332756-333889:1134	(Bla)Penicillin_Binding_Protein_Ecoli:CP002291:664439-666340:1902	(Bla)ampH_Ecoli:AP012030:395554-396711:1158	(Bla)blaTEM-105:AF516720:215-1075:861	blaTEM-1B_1_AY458016							(Bla)blaCTX-M-1:X92506:63-938:866	blaCTX-M-146_1_KY938173		A	0
ECL19427	(Bla)AmpC1_Ecoli:FN649414:2765051-2766355:1302	(Bla)AmpC2_Ecoli:CP002970:332756-333889:1134	(Bla)Penicillin_Binding_Protein_Ecoli:CP002291:664439-666340:1902	(Bla)ampH_Ecoli:AP012030:395554-396711:1158	(Bla)blaTEM-105:AF516720:215-1075:861	blaTEM-1B_1_AY458016							(Bla)blaCTX-M-1:X92506:63-938:866	blaCTX-M-146_1_KY938173		A	0
ECL19508	(Bla)AmpC1_Ecoli:FN649414:2765051-2766355:1302	(Bla)AmpC2_Ecoli:CP002970:332756-333889:1134	(Bla)Penicillin_Binding_Protein_Ecoli:CP002291:664439-666340:1902	(Bla)ampH_Ecoli:AP012030:395554-396711:1158	(Bla)blaTEM-141:AY956335:39-899:861	blaTEM-1B_1_AY458016										A	4
ECL19517	(Bla)AmpC1_Ecoli:FN649414:2765051-2766355:1302	(Bla)AmpC2_Ecoli:CP002970:332756-333889:1134	(Bla)Penicillin_Binding_Protein_Ecoli:CP002291:664439-666340:1902	(Bla)ampH_Ecoli:AP012030:395554-396711:1158												A	2
ECL19555	(Bla)AmpC1_Ecoli:FN649414:2765051-2766355:1302	(Bla)AmpC2_Ecoli:CP002970:332756-333889:1134	(Bla)Penicillin_Binding_Protein_Ecoli:CP002291:664439-666340:1902	(Bla)ampH_Ecoli:AP012030:395554-396711:1158	(Bla)blaTEM-105:AF516720:215-1075:861	blaTEM-1B_1_AY458016										A	0
ECL19602	(Bla)AmpC1_Ecoli:FN649414:2765051-2766355:1302	(Bla)AmpC2_Ecoli:CP002970:332756-333889:1134	(Bla)Penicillin_Binding_Protein_Ecoli:CP002291:664439-666340:1902	(Bla)ampH_Ecoli:AP012030:395554-396711:1158	(Bla)blaTEM-105:AF516720:215-1075:861	blaTEM-1B_1_AY458016										B
ECL19641	(Bla)AmpC1_Ecoli:FN649414:2765051-2766355:1302	(Bla)AmpC2_Ecoli:CP002970:332756-333889:1134	(Bla)Penicillin_Binding_Protein_Ecoli:CP002291:664439-666340:1902	(Bla)ampH_Ecoli:AP012030:395554-396711:1158	(Bla)blaTEM-105:AF516720:215-1075:861	blaTEM-1B_1_AY458016										A	4
ECL19664	(Bla)AmpC1_Ecoli:FN649414:2765051-2766355:1302	(Bla)AmpC2_Ecoli:CP002970:332756-333889:1134	(Bla)Penicillin_Binding_Protein_Ecoli:CP002291:664439-666340:1902	(Bla)ampH_Ecoli:AP012030:395554-396711:1158	(Bla)blaTEM-105:AF516720:215-1075:861	blaTEM-1B_1_AY458016										A	1
ECL19668	(Bla)AmpC1_Ecoli:FN649414:2765051-2766355:1302	(Bla)AmpC2_Ecoli:CP002970:332756-333889:1134	(Bla)Penicillin_Binding_Protein_Ecoli:CP002291:664439-666340:1902	(Bla)ampH_Ecoli:AP012030:395554-396711:1158	(Bla)blaTEM-105:AF516720:215-1075:861	blaTEM-1B_1_AY458016										A	1
ECL19751	(Bla)AmpC1_Ecoli:FN649414:2765051-2766355:1302	(Bla)AmpC2_Ecoli:CP002970:332756-333889:1134	(Bla)Penicillin_Binding_Protein_Ecoli:CP002291:664439-666340:1902	(Bla)ampH_Ecoli:AP012030:395554-396711:1158	(Bla)blaTEM-105:AF516720:215-1075:861	blaTEM-1B_1_AY458016										A	0
ECL19755	(Bla)AmpC1_Ecoli:FN649414:2765051-2766355:1302	(Bla)AmpC2_Ecoli:CP002970:332756-333889:1134	(Bla)Penicillin_Binding_Protein_Ecoli:CP002291:664439-666340:1902	(Bla)ampH_Ecoli:AP012030:395554-396711:1158	(Bla)blaTEM-105:AF516720:215-1075:861	blaTEM-1B_1_AY458016										A	0
ECL19763	(Bla)AmpC1_Ecoli:FN649414:2765051-2766355:1302	(Bla)AmpC2_Ecoli:CP002970:332756-333889:1134	(Bla)Penicillin_Binding_Protein_Ecoli:CP002291:664439-666340:1902	(Bla)ampH_Ecoli:AP012030:395554-396711:1158												A	0
ECL19788	(Bla)AmpC1_Ecoli:FN649414:2765051-2766355:1302	(Bla)AmpC2_Ecoli:CP002970:332756-333889:1134	(Bla)Penicillin_Binding_Protein_Ecoli:CP002291:664439-666340:1902	(Bla)ampH_Ecoli:AP012030:395554-396711:1158												E
ECL19820	(Bla)AmpC1_Ecoli:FN649414:2765051-2766355:1302	(Bla)AmpC2_Ecoli:CP002970:332756-333889:1134	(Bla)Penicillin_Binding_Protein_Ecoli:CP002291:664439-666340:1902	(Bla)ampH_Ecoli:AP012030:395554-396711:1158												B
ECL19885	(Bla)AmpC1_Ecoli:FN649414:2765051-2766355:1302	(Bla)AmpC2_Ecoli:CP002970:332756-333889:1134	(Bla)Penicillin_Binding_Protein_Ecoli:CP002291:664439-666340:1902	(Bla)ampH_Ecoli:AP012030:395554-396711:1158	(Bla)blaTEM-105:AF516720:215-1075:861	blaTEM-1B_1_AY458016										A	0
ECL19889	(Bla)AmpC1_Ecoli:FN649414:2765051-2766355:1302	(Bla)AmpC2_Ecoli:CP002970:332756-333889:1134	(Bla)Penicillin_Binding_Protein_Ecoli:CP002291:664439-666340:1902	(Bla)ampH_Ecoli:AP012030:395554-396711:1158	(Bla)blaTEM-122:AY307100:1-861:861	blaTEM-1A_1_HM749966	(Bla)blaBIL-1:X74512:127-1272:1146	(Bla)blaCMY-111:KJ155695:1-1146:1146	(Bla)blaLAT-1:X78117:122-1287:1146	blaCMY-2_1_X91840						A	3
ECL19894	(Bla)AmpC1_Ecoli:FN649414:2765051-2766355:1302	(Bla)AmpC2_Ecoli:CP002970:332756-333889:1134	(Bla)Penicillin_Binding_Protein_Ecoli:CP002291:664439-666340:1902	(Bla)ampH_Ecoli:AP012030:395554-396711:1158	(Bla)blaTEM-105:AF516720:215-1075:861	blaTEM-1B_1_AY458016										A	4
ECL19901	(Bla)AmpC1_Ecoli:FN649414:2765051-2766355:1302	(Bla)AmpC2_Ecoli:CP002970:332756-333889:1134	(Bla)Penicillin_Binding_Protein_Ecoli:CP002291:664439-666340:1902	(Bla)ampH_Ecoli:AP012030:395554-396711:1158												A	3
ECL19902	(Bla)AmpC1_Ecoli:FN649414:2765051-2766355:1302	(Bla)AmpC2_Ecoli:CP002970:332756-333889:1134	(Bla)Penicillin_Binding_Protein_Ecoli:CP002291:664439-666340:1902	(Bla)ampH_Ecoli:AP012030:395554-396711:1158												A	3
ECL19916	(Bla)AmpC1_Ecoli:FN649414:2765051-2766355:1302	(Bla)AmpC2_Ecoli:CP002970:332756-333889:1134	(Bla)Penicillin_Binding_Protein_Ecoli:CP002291:664439-666340:1902	(Bla)ampH_Ecoli:AP012030:395554-396711:1158	(Bla)blaTEM-105:AF516720:215-1075:861	blaTEM-1B_1_AY458016										A	1
ECL19931	(Bla)AmpC1_Ecoli:FN649414:2765051-2766355:1302	(Bla)AmpC2_Ecoli:CP002970:332756-333889:1134	(Bla)Penicillin_Binding_Protein_Ecoli:CP002291:664439-666340:1902	(Bla)ampH_Ecoli:AP012030:395554-396711:1158												B
ECL19939	(Bla)AmpC1_Ecoli:FN649414:2765051-2766355:1302	(Bla)AmpC2_Ecoli:CP002970:332756-333889:1134	(Bla)Penicillin_Binding_Protein_Ecoli:CP002291:664439-666340:1902	(Bla)ampH_Ecoli:AP012030:395554-396711:1158	(Bla)blaTEM-105:AF516720:215-1075:861	blaTEM-1B_1_AY458016										A	4
ECL19990	(Bla)AmpC1_Ecoli:FN649414:2765051-2766355:1302	(Bla)AmpC2_Ecoli:CP002970:332756-333889:1134	(Bla)Penicillin_Binding_Protein_Ecoli:CP002291:664439-666340:1902	(Bla)ampH_Ecoli:AP012030:395554-396711:1158												B
ECL20013	(Bla)AmpC1_Ecoli:FN649414:2765051-2766355:1302	(Bla)AmpC2_Ecoli:CP002970:332756-333889:1134	(Bla)Penicillin_Binding_Protein_Ecoli:CP002291:664439-666340:1902	(Bla)ampH_Ecoli:AP012030:395554-396711:1158	(Bla)blaTEM-105:AF516720:215-1075:861	blaTEM-1B_1_AY458016										A	1
ECL20014	(Bla)AmpC1_Ecoli:FN649414:2765051-2766355:1302	(Bla)AmpC2_Ecoli:CP002970:332756-333889:1134	(Bla)Penicillin_Binding_Protein_Ecoli:CP002291:664439-666340:1902	(Bla)ampH_Ecoli:AP012030:395554-396711:1158	(Bla)blaTEM-105:AF516720:215-1075:861	blaTEM-1B_1_AY458016										A	1
ECL20015	(Bla)AmpC1_Ecoli:FN649414:2765051-2766355:1302	(Bla)AmpC2_Ecoli:CP002970:332756-333889:1134	(Bla)Penicillin_Binding_Protein_Ecoli:CP002291:664439-666340:1902	(Bla)ampH_Ecoli:AP012030:395554-396711:1158	(Bla)blaTEM-105:AF516720:215-1075:861	blaTEM-1B_1_AY458016										A	1
ECL20018	(Bla)AmpC1_Ecoli:FN649414:2765051-2766355:1302	(Bla)AmpC2_Ecoli:CP002970:332756-333889:1134	(Bla)Penicillin_Binding_Protein_Ecoli:CP002291:664439-666340:1902	(Bla)ampH_Ecoli:AP012030:395554-396711:1158	(Bla)blaTEM-105:AF516720:215-1075:861	blaTEM-1B_1_AY458016										A	1
ECL20209	(Bla)AmpC1_Ecoli:FN649414:2765051-2766355:1302	(Bla)AmpC2_Ecoli:CP002970:332756-333889:1134	(Bla)Penicillin_Binding_Protein_Ecoli:CP002291:664439-666340:1902	(Bla)ampH_Ecoli:AP012030:395554-396711:1158	(Bla)blaTEM-105:AF516720:215-1075:861	blaTEM-1B_1_AY458016	(Bla)blaBIL-1:X74512:127-1272:1146	(Bla)blaCMY-111:KJ155695:1-1146:1146	(Bla)blaLAT-1:X78117:122-1287:1146	blaCMY-2_1_X91840						A	1
ECL20212	(Bla)AmpC1_Ecoli:FN649414:2765051-2766355:1302	(Bla)AmpC2_Ecoli:CP002970:332756-333889:1134	(Bla)Penicillin_Binding_Protein_Ecoli:CP002291:664439-666340:1902	(Bla)ampH_Ecoli:AP012030:395554-396711:1158	(Bla)blaTEM-105:AF516720:215-1075:861	blaTEM-1B_1_AY458016										A	1
ECL20223	(Bla)AmpC1_Ecoli:FN649414:2765051-2766355:1302	(Bla)AmpC2_Ecoli:CP002970:332756-333889:1134	(Bla)Penicillin_Binding_Protein_Ecoli:CP002291:664439-666340:1902	(Bla)ampH_Ecoli:AP012030:395554-396711:1158	(Bla)blaTEM-105:AF516720:215-1075:861	blaTEM-1B_1_AY458016										E
ECL20239	(Bla)AmpC1_Ecoli:FN649414:2765051-2766355:1302	(Bla)AmpC2_Ecoli:CP002970:332756-333889:1134	(Bla)Penicillin_Binding_Protein_Ecoli:CP002291:664439-666340:1902	(Bla)ampH_Ecoli:AP012030:395554-396711:1158	(Bla)blaTEM-105:AF516720:215-1075:861	blaTEM-1B_1_AY458016							(Bla)blaCTX-M-1:X92506:63-938:866	blaCTX-M-146_1_KY938173		A	1
ECL20256	(Bla)AmpC1_Ecoli:FN649414:2765051-2766355:1302	(Bla)AmpC2_Ecoli:CP002970:332756-333889:1134	(Bla)Penicillin_Binding_Protein_Ecoli:CP002291:664439-666340:1902	(Bla)ampH_Ecoli:AP012030:395554-396711:1158	(Bla)blaTEM-105:AF516720:215-1075:861	blaTEM-1B_1_AY458016							(Bla)blaCTX-M-1:X92506:63-938:866	blaCTX-M-146_1_KY938173		A	1
ECL20278	(Bla)AmpC1_Ecoli:FN649414:2765051-2766355:1302	(Bla)AmpC2_Ecoli:CP002970:332756-333889:1134	(Bla)Penicillin_Binding_Protein_Ecoli:CP002291:664439-666340:1902	(Bla)ampH_Ecoli:AP012030:395554-396711:1158	(Bla)blaTEM-105:AF516720:215-1075:861	blaTEM-1B_1_AY458016										A	1
ECL20290	(Bla)AmpC1_Ecoli:FN649414:2765051-2766355:1302	(Bla)AmpC2_Ecoli:CP002970:332756-333889:1134	(Bla)Penicillin_Binding_Protein_Ecoli:CP002291:664439-666340:1902	(Bla)ampH_Ecoli:AP012030:395554-396711:1158			(Bla)blaBIL-1:X74512:127-1272:1146	(Bla)blaCMY-111:KJ155695:1-1146:1146	(Bla)blaLAT-1:X78117:122-1287:1146	blaCMY-2_1_X91840						A	1
ECL20308	(Bla)AmpC1_Ecoli:FN649414:2765051-2766355:1302	(Bla)AmpC2_Ecoli:CP002970:332756-333889:1134	(Bla)Penicillin_Binding_Protein_Ecoli:CP002291:664439-666340:1902	(Bla)ampH_Ecoli:AP012030:395554-396711:1158	(Bla)blaTEM-141:AY956335:39-899:861	blaTEM-1B_1_AY458016										A	4
ECL20389	(Bla)AmpC1_Ecoli:FN649414:2765051-2766355:1302	(Bla)AmpC2_Ecoli:CP002970:332756-333889:1134	(Bla)Penicillin_Binding_Protein_Ecoli:CP002291:664439-666340:1902	(Bla)ampH_Ecoli:AP012030:395554-396711:1158	(Bla)blaTEM-105:AF516720:215-1075:861	blaTEM-1B_1_AY458016										A	1
ECL20395	(Bla)AmpC1_Ecoli:FN649414:2765051-2766355:1302	(Bla)AmpC2_Ecoli:CP002970:332756-333889:1134	(Bla)Penicillin_Binding_Protein_Ecoli:CP002291:664439-666340:1902	(Bla)ampH_Ecoli:AP012030:395554-396711:1158												NA
ECL20404	(Bla)AmpC1_Ecoli:FN649414:2765051-2766355:1302	(Bla)AmpC2_Ecoli:CP002970:332756-333889:1134	(Bla)Penicillin_Binding_Protein_Ecoli:CP002291:664439-666340:1902	(Bla)ampH_Ecoli:AP012030:395554-396711:1158	(Bla)blaTEM-105:AF516720:215-1075:861	blaTEM-1B_1_AY458016										A	1
ECL20408	(Bla)AmpC1_Ecoli:FN649414:2765051-2766355:1302	(Bla)AmpC2_Ecoli:CP002970:332756-333889:1134	(Bla)Penicillin_Binding_Protein_Ecoli:CP002291:664439-666340:1902	(Bla)ampH_Ecoli:AP012030:395554-396711:1158	(Bla)blaTEM-105:AF516720:215-1075:861	blaTEM-1B_1_AY458016										A	0
ECL20435	(Bla)AmpC1_Ecoli:FN649414:2765051-2766355:1302	(Bla)AmpC2_Ecoli:CP002970:332756-333889:1134	(Bla)Penicillin_Binding_Protein_Ecoli:CP002291:664439-666340:1902	(Bla)ampH_Ecoli:AP012030:395554-396711:1158	(Bla)blaTEM-105:AF516720:215-1075:861	blaTEM-1B_1_AY458016										A	1
ECL20436	(Bla)AmpC1_Ecoli:FN649414:2765051-2766355:1302	(Bla)AmpC2_Ecoli:CP002970:332756-333889:1134	(Bla)Penicillin_Binding_Protein_Ecoli:CP002291:664439-666340:1902	(Bla)ampH_Ecoli:AP012030:395554-396711:1158	(Bla)blaTEM-105:AF516720:215-1075:861	blaTEM-1B_1_AY458016	(Bla)blaBIL-1:X74512:127-1272:1146	(Bla)blaCMY-111:KJ155695:1-1146:1146	(Bla)blaLAT-1:X78117:122-1287:1146	blaCMY-2_1_X91840						A	1
ECL20462	(Bla)AmpC1_Ecoli:FN649414:2765051-2766355:1302	(Bla)AmpC2_Ecoli:CP002970:332756-333889:1134	(Bla)Penicillin_Binding_Protein_Ecoli:CP002291:664439-666340:1902	(Bla)ampH_Ecoli:AP012030:395554-396711:1158												E
ECL20544	(Bla)AmpC1_Ecoli:FN649414:2765051-2766355:1302	(Bla)AmpC2_Ecoli:CP002970:332756-333889:1134	(Bla)Penicillin_Binding_Protein_Ecoli:CP002291:664439-666340:1902	(Bla)ampH_Ecoli:AP012030:395554-396711:1158	(Bla)blaTEM-105:AF516720:215-1075:861	blaTEM-1B_1_AY458016										A	1
ECL20550	(Bla)AmpC1_Ecoli:FN649414:2765051-2766355:1302	(Bla)AmpC2_Ecoli:CP002970:332756-333889:1134	(Bla)Penicillin_Binding_Protein_Ecoli:CP002291:664439-666340:1902	(Bla)ampH_Ecoli:AP012030:395554-396711:1158	(Bla)blaTEM-105:AF516720:215-1075:861	blaTEM-1B_1_AY458016										A	4
ECL20566	(Bla)AmpC1_Ecoli:FN649414:2765051-2766355:1302	(Bla)AmpC2_Ecoli:CP002970:332756-333889:1134	(Bla)Penicillin_Binding_Protein_Ecoli:CP002291:664439-666340:1902	(Bla)ampH_Ecoli:AP012030:395554-396711:1158	(Bla)blaTEM-105:AF516720:215-1075:861	blaTEM-1B_1_AY458016										A	1
ECL20622	(Bla)AmpC1_Ecoli:FN649414:2765051-2766355:1302	(Bla)AmpC2_Ecoli:CP002970:332756-333889:1134	(Bla)Penicillin_Binding_Protein_Ecoli:CP002291:664439-666340:1902	(Bla)ampH_Ecoli:AP012030:395554-396711:1158	(Bla)blaTEM-105:AF516720:215-1075:861	blaTEM-1B_1_AY458016	(Bla)blaBIL-1:X74512:127-1272:1146	(Bla)blaCMY-132:KP862820:1-1146:1146	(Bla)blaLAT-1:X78117:122-1287:1146	blaCMY-140_1_KX354367						A	1
ECL20627	(Bla)AmpC1_Ecoli:FN649414:2765051-2766355:1302	(Bla)AmpC2_Ecoli:CP002970:332756-333889:1134	(Bla)Penicillin_Binding_Protein_Ecoli:CP002291:664439-666340:1902	(Bla)ampH_Ecoli:AP012030:395554-396711:1158	(Bla)blaTEM-105:AF516720:215-1075:861	blaTEM-1B_1_AY458016										A	11
ECL20721	(Bla)AmpC1_Ecoli:FN649414:2765051-2766355:1302	(Bla)AmpC2_Ecoli:CP002970:332756-333889:1134	(Bla)Penicillin_Binding_Protein_Ecoli:CP002291:664439-666340:1902	(Bla)ampH_Ecoli:AP012030:395554-396711:1158	(Bla)blaTEM-105:AF516720:215-1075:861	blaTEM-1B_1_AY458016										A	0
ECL20725	(Bla)AmpC1_Ecoli:FN649414:2765051-2766355:1302	(Bla)AmpC2_Ecoli:CP002970:332756-333889:1134	(Bla)Penicillin_Binding_Protein_Ecoli:CP002291:664439-666340:1902	(Bla)ampH_Ecoli:AP012030:395554-396711:1158	(Bla)blaTEM-105:AF516720:215-1075:861	blaTEM-1B_1_AY458016										A	1
ECL20769	(Bla)AmpC1_Ecoli:FN649414:2765051-2766355:1302	(Bla)AmpC2_Ecoli:CP002970:332756-333889:1134	(Bla)Penicillin_Binding_Protein_Ecoli:CP002291:664439-666340:1902	(Bla)ampH_Ecoli:AP012030:395554-396711:1158	(Bla)blaTEM-105:AF516720:215-1075:861	blaTEM-1B_1_AY458016										A	1
ECL20776	(Bla)AmpC1_Ecoli:FN649414:2765051-2766355:1302	(Bla)AmpC2_Ecoli:CP002970:332756-333889:1134	(Bla)Penicillin_Binding_Protein_Ecoli:CP002291:664439-666340:1902	(Bla)ampH_Ecoli:AP012030:395554-396711:1158	(Bla)blaTEM-105:AF516720:215-1075:861	blaTEM-1B_1_AY458016										A	1
ECL20778	(Bla)AmpC1_Ecoli:FN649414:2765051-2766355:1302	(Bla)AmpC2_Ecoli:CP002970:332756-333889:1134	(Bla)Penicillin_Binding_Protein_Ecoli:CP002291:664439-666340:1902	(Bla)ampH_Ecoli:AP012030:395554-396711:1158	(Bla)blaTEM-105:AF516720:215-1075:861	blaTEM-1B_1_AY458016										A	1
ECL20797	(Bla)AmpC1_Ecoli:FN649414:2765051-2766355:1302	(Bla)AmpC2_Ecoli:CP002970:332756-333889:1134	(Bla)Penicillin_Binding_Protein_Ecoli:CP002291:664439-666340:1902	(Bla)ampH_Ecoli:AP012030:395554-396711:1158									(Bla)blaCTX-M-1:X92506:63-938:866	blaCTX-M-146_1_KY938173		B
ECL20814	(Bla)AmpC1_Ecoli:FN649414:2765051-2766355:1302	(Bla)AmpC2_Ecoli:CP002970:332756-333889:1134	(Bla)Penicillin_Binding_Protein_Ecoli:CP002291:664439-666340:1902	(Bla)ampH_Ecoli:AP012030:395554-396711:1158	(Bla)blaTEM-105:AF516720:215-1075:861	blaTEM-1B_1_AY458016										A	1
ECL20836	(Bla)AmpC1_Ecoli:FN649414:2765051-2766355:1302	(Bla)AmpC2_Ecoli:CP002970:332756-333889:1134	(Bla)Penicillin_Binding_Protein_Ecoli:CP002291:664439-666340:1902	(Bla)ampH_Ecoli:AP012030:395554-396711:1158	(Bla)blaTEM-105:AF516720:215-1075:861	blaTEM-1B_1_AY458016										A	1
ECL20846	(Bla)AmpC1_Ecoli:FN649414:2765051-2766355:1302	(Bla)AmpC2_Ecoli:CP002970:332756-333889:1134	(Bla)Penicillin_Binding_Protein_Ecoli:CP002291:664439-666340:1902	(Bla)ampH_Ecoli:AP012030:395554-396711:1158	(Bla)blaTEM-105:AF516720:215-1075:861	blaTEM-1B_1_AY458016										A	1
ECL20850	(Bla)AmpC1_Ecoli:FN649414:2765051-2766355:1302	(Bla)AmpC2_Ecoli:CP002970:332756-333889:1134	(Bla)Penicillin_Binding_Protein_Ecoli:CP002291:664439-666340:1902	(Bla)ampH_Ecoli:AP012030:395554-396711:1158	(Bla)blaTEM-105:AF516720:215-1075:861	blaTEM-1B_1_AY458016										A	1
ECL20887	(Bla)AmpC1_Ecoli:FN649414:2765051-2766355:1302	(Bla)AmpC2_Ecoli:CP002970:332756-333889:1134	(Bla)Penicillin_Binding_Protein_Ecoli:CP002291:664439-666340:1902	(Bla)ampH_Ecoli:AP012030:395554-396711:1158	(Bla)blaTEM-105:AF516720:215-1075:861	blaTEM-1B_1_AY458016										A	1
ECL20896	(Bla)AmpC1_Ecoli:FN649414:2765051-2766355:1302	(Bla)AmpC2_Ecoli:CP002970:332756-333889:1134	(Bla)Penicillin_Binding_Protein_Ecoli:CP002291:664439-666340:1902	(Bla)ampH_Ecoli:AP012030:395554-396711:1158	(Bla)blaTEM-105:AF516720:215-1075:861	blaTEM-1B_1_AY458016										A	11
ECL20906	(Bla)AmpC1_Ecoli:FN649414:2765051-2766355:1302	(Bla)AmpC2_Ecoli:CP002970:332756-333889:1134	(Bla)Penicillin_Binding_Protein_Ecoli:CP002291:664439-666340:1902	(Bla)ampH_Ecoli:AP012030:395554-396711:1158	(Bla)blaTEM-105:AF516720:215-1075:861	blaTEM-1B_1_AY458016										A	0
ECL20911	(Bla)AmpC1_Ecoli:FN649414:2765051-2766355:1302	(Bla)AmpC2_Ecoli:CP002970:332756-333889:1134	(Bla)Penicillin_Binding_Protein_Ecoli:CP002291:664439-666340:1902	(Bla)ampH_Ecoli:AP012030:395554-396711:1158	(Bla)blaTEM-105:AF516720:215-1075:861	blaTEM-1B_1_AY458016							(Bla)blaCTX-M-1:X92506:63-938:866	blaCTX-M-146_1_KY938173		A	1
ECL20918	(Bla)AmpC1_Ecoli:FN649414:2765051-2766355:1302	(Bla)AmpC2_Ecoli:CP002970:332756-333889:1134	(Bla)Penicillin_Binding_Protein_Ecoli:CP002291:664439-666340:1902	(Bla)ampH_Ecoli:AP012030:395554-396711:1158	(Bla)blaTEM-105:AF516720:215-1075:861	blaTEM-1B_1_AY458016										A	1
ECL20924	(Bla)AmpC1_Ecoli:FN649414:2765051-2766355:1302	(Bla)AmpC2_Ecoli:CP002970:332756-333889:1134	(Bla)Penicillin_Binding_Protein_Ecoli:CP002291:664439-666340:1902	(Bla)ampH_Ecoli:AP012030:395554-396711:1158	(Bla)blaTEM-105:AF516720:215-1075:861	blaTEM-1B_1_AY458016										A	1
ECL21170	(Bla)AmpC1_Ecoli:FN649414:2765051-2766355:1302	(Bla)AmpC2_Ecoli:CP002970:332756-333889:1134	(Bla)Penicillin_Binding_Protein_Ecoli:CP002291:664439-666340:1902	(Bla)ampH_Ecoli:AP012030:395554-396711:1158												F
ECL21259	(Bla)AmpC1_Ecoli:FN649414:2765051-2766355:1302	(Bla)AmpC2_Ecoli:CP002970:332756-333889:1134	(Bla)Penicillin_Binding_Protein_Ecoli:CP002291:664439-666340:1902	(Bla)ampH_Ecoli:AP012030:395554-396711:1158	(Bla)blaTEM-105:AF516720:215-1075:861	blaTEM-1B_1_AY458016							(Bla)blaCTX-M-1:X92506:63-938:866	blaCTX-M-146_1_KY938173		A	1
ECL21274	(Bla)AmpC1_Ecoli:FN649414:2765051-2766355:1302	(Bla)AmpC2_Ecoli:CP002970:332756-333889:1134	(Bla)Penicillin_Binding_Protein_Ecoli:CP002291:664439-666340:1902	(Bla)ampH_Ecoli:AP012030:395554-396711:1158	(Bla)blaTEM-105:AF516720:215-1075:861	blaTEM-1B_1_AY458016							(Bla)blaCTX-M-1:X92506:63-938:866	blaCTX-M-146_1_KY938173		A	1
ECL21290	(Bla)AmpC1_Ecoli:FN649414:2765051-2766355:1302	(Bla)AmpC2_Ecoli:CP002970:332756-333889:1134	(Bla)Penicillin_Binding_Protein_Ecoli:CP002291:664439-666340:1902	(Bla)ampH_Ecoli:AP012030:395554-396711:1158	(Bla)blaTEM-105:AF516720:215-1075:861	blaTEM-1B_1_AY458016										A	1
ECL21405	(Bla)AmpC1_Ecoli:FN649414:2765051-2766355:1302	(Bla)AmpC2_Ecoli:CP002970:332756-333889:1134	(Bla)Penicillin_Binding_Protein_Ecoli:CP002291:664439-666340:1902	(Bla)ampH_Ecoli:AP012030:395554-396711:1158	(Bla)blaTEM-105:AF516720:215-1075:861	blaTEM-1B_1_AY458016										A	1
ECL21412	(Bla)AmpC1_Ecoli:FN649414:2765051-2766355:1302	(Bla)AmpC2_Ecoli:CP002970:332756-333889:1134	(Bla)Penicillin_Binding_Protein_Ecoli:CP002291:664439-666340:1902	(Bla)ampH_Ecoli:AP012030:395554-396711:1158	(Bla)blaTEM-105:AF516720:215-1075:861	blaTEM-1B_1_AY458016	(Bla)blaBIL-1:X74512:127-1272:1146	(Bla)blaCMY-111:KJ155695:1-1146:1146	(Bla)blaLAT-1:X78117:122-1287:1146	blaCMY-2_1_X91840						A	1
ECL21415	(Bla)AmpC1_Ecoli:FN649414:2765051-2766355:1302	(Bla)AmpC2_Ecoli:CP002970:332756-333889:1134	(Bla)Penicillin_Binding_Protein_Ecoli:CP002291:664439-666340:1902	(Bla)ampH_Ecoli:AP012030:395554-396711:1158												A	0
ECL21464	(Bla)AmpC1_Ecoli:FN649414:2765051-2766355:1302	(Bla)AmpC2_Ecoli:CP002970:332756-333889:1134	(Bla)Penicillin_Binding_Protein_Ecoli:CP002291:664439-666340:1902	(Bla)ampH_Ecoli:AP012030:395554-396711:1158												C
ECL21483	(Bla)AmpC1_Ecoli:FN649414:2765051-2766355:1302	(Bla)AmpC2_Ecoli:CP002970:332756-333889:1134	(Bla)Penicillin_Binding_Protein_Ecoli:CP002291:664439-666340:1902	(Bla)ampH_Ecoli:AP012030:395554-396711:1158	(Bla)blaTEM-105:AF516720:215-1075:861	blaTEM-1B_1_AY458016	(Bla)blaBIL-1:X74512:127-1272:1146	(Bla)blaCMY-44:FJ437066:1-1134:1134	(Bla)blaLAT-1:X78117:122-1287:1146	blaCMY-140_1_KX354367						A	1
ECL21505	(Bla)AmpC1_Ecoli:FN649414:2765051-2766355:1302	(Bla)AmpC2_Ecoli:CP002970:332756-333889:1134	(Bla)Penicillin_Binding_Protein_Ecoli:CP002291:664439-666340:1902	(Bla)ampH_Ecoli:AP012030:395554-396711:1158	(Bla)blaTEM-105:AF516720:215-1075:861	blaTEM-1B_1_AY458016	(Bla)blaBIL-1:X74512:127-1272:1146	(Bla)blaCMY-111:KJ155695:1-1146:1146	(Bla)blaLAT-1:X78117:122-1287:1146	blaCMY-2_1_X91840						A	1
ECL21512	(Bla)AmpC1_Ecoli:FN649414:2765051-2766355:1302	(Bla)AmpC2_Ecoli:CP002970:332756-333889:1134	(Bla)Penicillin_Binding_Protein_Ecoli:CP002291:664439-666340:1902	(Bla)ampH_Ecoli:AP012030:395554-396711:1158	(Bla)blaTEM-105:AF516720:215-1075:861	blaTEM-1B_1_AY458016										A	1
ECL21518	(Bla)AmpC1_Ecoli:FN649414:2765051-2766355:1302	(Bla)AmpC2_Ecoli:CP002970:332756-333889:1134	(Bla)Penicillin_Binding_Protein_Ecoli:CP002291:664439-666340:1902	(Bla)ampH_Ecoli:AP012030:395554-396711:1158	(Bla)blaTEM-105:AF516720:215-1075:861	blaTEM-1B_1_AY458016										A	11
ECL21541	(Bla)AmpC1_Ecoli:FN649414:2765051-2766355:1302	(Bla)AmpC2_Ecoli:CP002970:332756-333889:1134	(Bla)Penicillin_Binding_Protein_Ecoli:CP002291:664439-666340:1902	(Bla)ampH_Ecoli:AP012030:395554-396711:1158	(Bla)blaTEM-105:AF516720:215-1075:861	blaTEM-1B_1_AY458016	(Bla)blaBIL-1:X74512:127-1272:1146	(Bla)blaCMY-44:FJ437066:1-1134:1134	(Bla)blaLAT-1:X78117:122-1287:1146	blaCMY-140_1_KX354367						A	1
ECL21542	(Bla)AmpC1_Ecoli:FN649414:2765051-2766355:1302	(Bla)AmpC2_Ecoli:CP002970:332756-333889:1134	(Bla)Penicillin_Binding_Protein_Ecoli:CP002291:664439-666340:1902	(Bla)ampH_Ecoli:AP012030:395554-396711:1158												A	1
ECL21551	(Bla)AmpC1_Ecoli:FN649414:2765051-2766355:1302	(Bla)AmpC2_Ecoli:CP002970:332756-333889:1134	(Bla)Penicillin_Binding_Protein_Ecoli:CP002291:664439-666340:1902	(Bla)ampH_Ecoli:AP012030:395554-396711:1158	(Bla)blaTEM-105:AF516720:215-1075:861	blaTEM-1B_1_AY458016										A	1
ECL21584	(Bla)AmpC1_Ecoli:FN649414:2765051-2766355:1302	(Bla)AmpC2_Ecoli:CP002970:332756-333889:1134	(Bla)Penicillin_Binding_Protein_Ecoli:CP002291:664439-666340:1902	(Bla)ampH_Ecoli:AP012030:395554-396711:1158	(Bla)blaTEM-105:AF516720:215-1075:861	blaTEM-1B_1_AY458016							(Bla)blaCTX-M-1:X92506:63-938:866	blaCTX-M-146_1_KY938173		A	4
ECL21628	(Bla)AmpC1_Ecoli:FN649414:2765051-2766355:1302	(Bla)AmpC2_Ecoli:CP002970:332756-333889:1134	(Bla)Penicillin_Binding_Protein_Ecoli:CP002291:664439-666340:1902	(Bla)ampH_Ecoli:AP012030:395554-396711:1158	(Bla)blaTEM-105:AF516720:215-1075:861	blaTEM-1B_1_AY458016										A	1
ECL21652	(Bla)AmpC1_Ecoli:FN649414:2765051-2766355:1302	(Bla)AmpC2_Ecoli:CP002970:332756-333889:1134	(Bla)Penicillin_Binding_Protein_Ecoli:CP002291:664439-666340:1902	(Bla)ampH_Ecoli:AP012030:395554-396711:1158	(Bla)blaTEM-105:AF516720:215-1075:861	blaTEM-1B_1_AY458016										A	1
ECL21655	(Bla)AmpC1_Ecoli:FN649414:2765051-2766355:1302	(Bla)AmpC2_Ecoli:CP002970:332756-333889:1134	(Bla)Penicillin_Binding_Protein_Ecoli:CP002291:664439-666340:1902	(Bla)ampH_Ecoli:AP012030:395554-396711:1158	(Bla)blaTEM-105:AF516720:215-1075:861	blaTEM-1B_1_AY458016	(Bla)blaBIL-1:X74512:127-1272:1146	(Bla)blaCMY-111:KJ155695:1-1146:1146	(Bla)blaLAT-1:X78117:122-1287:1146	blaCMY-2_1_X91840						A	1
ECL21657	(Bla)AmpC1_Ecoli:FN649414:2765051-2766355:1302	(Bla)AmpC2_Ecoli:CP002970:332756-333889:1134	(Bla)Penicillin_Binding_Protein_Ecoli:CP002291:664439-666340:1902	(Bla)ampH_Ecoli:AP012030:395554-396711:1158	(Bla)blaTEM-105:AF516720:215-1075:861	blaTEM-1B_1_AY458016										A	1
ECL21676	(Bla)AmpC1_Ecoli:FN649414:2765051-2766355:1302	(Bla)AmpC2_Ecoli:CP002970:332756-333889:1134	(Bla)Penicillin_Binding_Protein_Ecoli:CP002291:664439-666340:1902	(Bla)ampH_Ecoli:AP012030:395554-396711:1158	(Bla)blaTEM-105:AF516720:215-1075:861	blaTEM-1B_1_AY458016										A	1
ECL21680	(Bla)AmpC1_Ecoli:FN649414:2765051-2766355:1302	(Bla)AmpC2_Ecoli:CP002970:332756-333889:1134	(Bla)Penicillin_Binding_Protein_Ecoli:CP002291:664439-666340:1902	(Bla)ampH_Ecoli:AP012030:395554-396711:1158	(Bla)blaTEM-105:AF516720:215-1075:861	blaTEM-1B_1_AY458016										A	1
ECL21730	(Bla)AmpC1_Ecoli:FN649414:2765051-2766355:1302	(Bla)AmpC2_Ecoli:CP002970:332756-333889:1134	(Bla)Penicillin_Binding_Protein_Ecoli:CP002291:664439-666340:1902	(Bla)ampH_Ecoli:AP012030:395554-396711:1158	(Bla)blaTEM-105:AF516720:215-1075:861	blaTEM-1B_1_AY458016										A	1
ECL21732	(Bla)AmpC1_Ecoli:FN649414:2765051-2766355:1302	(Bla)AmpC2_Ecoli:CP002970:332756-333889:1134	(Bla)Penicillin_Binding_Protein_Ecoli:CP002291:664439-666340:1902	(Bla)ampH_Ecoli:AP012030:395554-396711:1158												C
ECL21756	(Bla)AmpC1_Ecoli:FN649414:2765051-2766355:1302	(Bla)AmpC2_Ecoli:CP002970:332756-333889:1134	(Bla)Penicillin_Binding_Protein_Ecoli:CP002291:664439-666340:1902	(Bla)ampH_Ecoli:AP012030:395554-396711:1158	(Bla)blaTEM-105:AF516720:215-1075:861	blaTEM-1B_1_AY458016							(Bla)blaCTX-M-1:X92506:63-938:866	blaCTX-M-146_1_KY938173		B
ECL21837	(Bla)AmpC1_Ecoli:FN649414:2765051-2766355:1302	(Bla)AmpC2_Ecoli:CP002970:332756-333889:1134	(Bla)Penicillin_Binding_Protein_Ecoli:CP002291:664439-666340:1902	(Bla)ampH_Ecoli:AP012030:395554-396711:1158	(Bla)blaTEM-105:AF516720:215-1075:861	blaTEM-1B_1_AY458016										A	1
ECL21975	(Bla)AmpC1_Ecoli:FN649414:2765051-2766355:1302	(Bla)AmpC2_Ecoli:CP002970:332756-333889:1134	(Bla)Penicillin_Binding_Protein_Ecoli:CP002291:664439-666340:1902	(Bla)ampH_Ecoli:AP012030:395554-396711:1158	(Bla)blaTEM-105:AF516720:215-1075:861	blaTEM-1B_1_AY458016										A	0
ECL21979	(Bla)AmpC1_Ecoli:FN649414:2765051-2766355:1302	(Bla)AmpC2_Ecoli:CP002970:332756-333889:1134	(Bla)Penicillin_Binding_Protein_Ecoli:CP002291:664439-666340:1902	(Bla)ampH_Ecoli:AP012030:395554-396711:1158	(Bla)blaTEM-105:AF516720:215-1075:861	blaTEM-1B_1_AY458016	(Bla)blaBIL-1:X74512:127-1272:1146	(Bla)blaCMY-111:KJ155695:1-1146:1146	(Bla)blaLAT-1:X78117:122-1287:1146	blaCMY-2_1_X91840						A	1
ECL22052	(Bla)AmpC1_Ecoli:FN649414:2765051-2766355:1302	(Bla)AmpC2_Ecoli:CP002970:332756-333889:1134	(Bla)Penicillin_Binding_Protein_Ecoli:CP002291:664439-666340:1902	(Bla)ampH_Ecoli:AP012030:395554-396711:1158	(Bla)blaTEM-105:AF516720:215-1075:861	blaTEM-1B_1_AY458016										A	1
ECL22093	(Bla)AmpC1_Ecoli:FN649414:2765051-2766355:1302	(Bla)AmpC2_Ecoli:CP002970:332756-333889:1134	(Bla)Penicillin_Binding_Protein_Ecoli:CP002291:664439-666340:1902	(Bla)ampH_Ecoli:AP012030:395554-396711:1158	(Bla)blaTEM-105:AF516720:215-1075:861	blaTEM-1B_1_AY458016										A	1
ECL22099	(Bla)AmpC1_Ecoli:FN649414:2765051-2766355:1302	(Bla)AmpC2_Ecoli:CP002970:332756-333889:1134	(Bla)Penicillin_Binding_Protein_Ecoli:CP002291:664439-666340:1902	(Bla)ampH_Ecoli:AP012030:395554-396711:1158	(Bla)blaTEM-105:AF516720:215-1075:861	blaTEM-1B_1_AY458016										A	1
ECL22128	(Bla)AmpC1_Ecoli:FN649414:2765051-2766355:1302	(Bla)AmpC2_Ecoli:CP002970:332756-333889:1134	(Bla)Penicillin_Binding_Protein_Ecoli:CP002291:664439-666340:1902	(Bla)ampH_Ecoli:AP012030:395554-396711:1158	(Bla)blaTEM-105:AF516720:215-1075:861	blaTEM-1B_1_AY458016										A	1
ECL22134	(Bla)AmpC1_Ecoli:FN649414:2765051-2766355:1302	(Bla)AmpC2_Ecoli:CP002970:332756-333889:1134	(Bla)Penicillin_Binding_Protein_Ecoli:CP002291:664439-666340:1902	(Bla)ampH_Ecoli:AP012030:395554-396711:1158	(Bla)blaTEM-105:AF516720:215-1075:861	blaTEM-1B_1_AY458016										A	11
ECL22146	(Bla)AmpC1_Ecoli:FN649414:2765051-2766355:1302	(Bla)AmpC2_Ecoli:CP002970:332756-333889:1134	(Bla)Penicillin_Binding_Protein_Ecoli:CP002291:664439-666340:1902	(Bla)ampH_Ecoli:AP012030:395554-396711:1158									(Bla)blaCTX-M-1:X92506:63-938:866	blaCTX-M-146_1_KY938173		C
ECL22172	(Bla)AmpC1_Ecoli:FN649414:2765051-2766355:1302	(Bla)AmpC2_Ecoli:CP002970:332756-333889:1134	(Bla)Penicillin_Binding_Protein_Ecoli:CP002291:664439-666340:1902	(Bla)ampH_Ecoli:AP012030:395554-396711:1158												C
ECL22215	(Bla)AmpC1_Ecoli:FN649414:2765051-2766355:1302	(Bla)AmpC2_Ecoli:CP002970:332756-333889:1134	(Bla)Penicillin_Binding_Protein_Ecoli:CP002291:664439-666340:1902	(Bla)ampH_Ecoli:AP012030:395554-396711:1158	(Bla)blaTEM-105:AF516720:215-1075:861	blaTEM-1B_1_AY458016										A	1
ECL22265	(Bla)AmpC1_Ecoli:FN649414:2765051-2766355:1302	(Bla)AmpC2_Ecoli:CP002970:332756-333889:1134	(Bla)Penicillin_Binding_Protein_Ecoli:CP002291:664439-666340:1902	(Bla)ampH_Ecoli:AP012030:395554-396711:1158												A	1
ECL22274	(Bla)AmpC1_Ecoli:FN649414:2765051-2766355:1302	(Bla)AmpC2_Ecoli:CP002970:332756-333889:1134	(Bla)Penicillin_Binding_Protein_Ecoli:CP002291:664439-666340:1902	(Bla)ampH_Ecoli:AP012030:395554-396711:1158	(Bla)blaTEM-105:AF516720:215-1075:861	blaTEM-1B_1_AY458016										A	1
ECL22293	(Bla)AmpC1_Ecoli:FN649414:2765051-2766355:1302	(Bla)AmpC2_Ecoli:CP002970:332756-333889:1134	(Bla)Penicillin_Binding_Protein_Ecoli:CP002291:664439-666340:1902	(Bla)ampH_Ecoli:AP012030:395554-396711:1158	(Bla)blaTEM-105:AF516720:215-1075:861	blaTEM-1B_1_AY458016										A	1
ECL22298	(Bla)AmpC1_Ecoli:FN649414:2765051-2766355:1302	(Bla)AmpC2_Ecoli:CP002970:332756-333889:1134	(Bla)Penicillin_Binding_Protein_Ecoli:CP002291:664439-666340:1902	(Bla)ampH_Ecoli:AP012030:395554-396711:1158	(Bla)blaTEM-105:AF516720:215-1075:861	blaTEM-1B_1_AY458016										A	1
ECL22341	(Bla)AmpC1_Ecoli:FN649414:2765051-2766355:1302	(Bla)AmpC2_Ecoli:CP002970:332756-333889:1134	(Bla)Penicillin_Binding_Protein_Ecoli:CP002291:664439-666340:1902	(Bla)ampH_Ecoli:AP012030:395554-396711:1158	(Bla)blaTEM-105:AF516720:215-1075:861	blaTEM-1B_1_AY458016							(Bla)blaCTX-M-1:X92506:63-938:866	blaCTX-M-146_1_KY938173		B
ECL22433	(Bla)AmpC1_Ecoli:FN649414:2765051-2766355:1302	(Bla)AmpC2_Ecoli:CP002970:332756-333889:1134	(Bla)Penicillin_Binding_Protein_Ecoli:CP002291:664439-666340:1902	(Bla)ampH_Ecoli:AP012030:395554-396711:1158												A	1
ECL22438	(Bla)AmpC1_Ecoli:FN649414:2765051-2766355:1302	(Bla)AmpC2_Ecoli:CP002970:332756-333889:1134	(Bla)Penicillin_Binding_Protein_Ecoli:CP002291:664439-666340:1902	(Bla)ampH_Ecoli:AP012030:395554-396711:1158	(Bla)blaTEM-105:AF516720:215-1075:861	blaTEM-1B_1_AY458016	(Bla)blaBIL-1:X74512:127-1272:1146	(Bla)blaCMY-111:KJ155695:1-1146:1146	(Bla)blaLAT-1:X78117:122-1287:1146	blaCMY-2_1_X91840						A	1
ECL22447	(Bla)AmpC1_Ecoli:FN649414:2765051-2766355:1302	(Bla)AmpC2_Ecoli:CP002970:332756-333889:1134	(Bla)Penicillin_Binding_Protein_Ecoli:CP002291:664439-666340:1902	(Bla)ampH_Ecoli:AP012030:395554-396711:1158	(Bla)blaTEM-105:AF516720:215-1075:861	blaTEM-1B_1_AY458016										A	1
ECL22487	(Bla)AmpC1_Ecoli:FN649414:2765051-2766355:1302	(Bla)AmpC2_Ecoli:CP002970:332756-333889:1134	(Bla)Penicillin_Binding_Protein_Ecoli:CP002291:664439-666340:1902	(Bla)ampH_Ecoli:AP012030:395554-396711:1158	(Bla)blaTEM-105:AF516720:215-1075:861	blaTEM-1B_1_AY458016										A	4
ECL22491	(Bla)AmpC1_Ecoli:FN649414:2765051-2766355:1302	(Bla)AmpC2_Ecoli:CP002970:332756-333889:1134	(Bla)Penicillin_Binding_Protein_Ecoli:CP002291:664439-666340:1902	(Bla)ampH_Ecoli:AP012030:395554-396711:1158	(Bla)blaTEM-105:AF516720:215-1075:861	blaTEM-1B_1_AY458016										A	1
ECL22503	(Bla)AmpC1_Ecoli:FN649414:2765051-2766355:1302	(Bla)AmpC2_Ecoli:CP002970:332756-333889:1134	(Bla)Penicillin_Binding_Protein_Ecoli:CP002291:664439-666340:1902	(Bla)ampH_Ecoli:AP012030:395554-396711:1158	(Bla)blaTEM-105:AF516720:215-1075:861	blaTEM-1B_1_AY458016										A	1
ECL22505	(Bla)AmpC1_Ecoli:FN649414:2765051-2766355:1302	(Bla)AmpC2_Ecoli:CP002970:332756-333889:1134	(Bla)Penicillin_Binding_Protein_Ecoli:CP002291:664439-666340:1902	(Bla)ampH_Ecoli:AP012030:395554-396711:1158	(Bla)blaTEM-105:AF516720:215-1075:861	blaTEM-1B_1_AY458016										A	1
ECL22529	(Bla)AmpC1_Ecoli:FN649414:2765051-2766355:1302	(Bla)AmpC2_Ecoli:CP002970:332756-333889:1134	(Bla)Penicillin_Binding_Protein_Ecoli:CP002291:664439-666340:1902	(Bla)ampH_Ecoli:AP012030:395554-396711:1158	(Bla)blaTEM-105:AF516720:215-1075:861	blaTEM-1B_1_AY458016							(Bla)blaCTX-M-1:X92506:63-938:866	blaCTX-M-146_1_KY938173		B
ECL22536	(Bla)AmpC1_Ecoli:FN649414:2765051-2766355:1302	(Bla)AmpC2_Ecoli:CP002970:332756-333889:1134	(Bla)Penicillin_Binding_Protein_Ecoli:CP002291:664439-666340:1902	(Bla)ampH_Ecoli:AP012030:395554-396711:1158	(Bla)blaTEM-105:AF516720:215-1075:861	blaTEM-1B_1_AY458016										A	11
ECL22553	(Bla)AmpC1_Ecoli:FN649414:2765051-2766355:1302	(Bla)AmpC2_Ecoli:CP002970:332756-333889:1134	(Bla)Penicillin_Binding_Protein_Ecoli:CP002291:664439-666340:1902	(Bla)ampH_Ecoli:AP012030:395554-396711:1158	(Bla)blaTEM-105:AF516720:215-1075:861	blaTEM-1B_1_AY458016										A	1
ECL22653	(Bla)AmpC1_Ecoli:FN649414:2765051-2766355:1302	(Bla)AmpC2_Ecoli:CP002970:332756-333889:1134	(Bla)Penicillin_Binding_Protein_Ecoli:CP002291:664439-666340:1902	(Bla)ampH_Ecoli:AP012030:395554-396711:1158	(Bla)blaTEM-105:AF516720:215-1075:861	blaTEM-1B_1_AY458016							(Bla)blaCTX-M-1:X92506:63-938:866	blaCTX-M-146_1_KY938173		B
ECL22730	(Bla)AmpC1_Ecoli:FN649414:2765051-2766355:1302	(Bla)AmpC2_Ecoli:CP002970:332756-333889:1134	(Bla)Penicillin_Binding_Protein_Ecoli:CP002291:664439-666340:1902	(Bla)ampH_Ecoli:AP012030:395554-396711:1158												C
ECL22741	(Bla)AmpC1_Ecoli:FN649414:2765051-2766355:1302	(Bla)AmpC2_Ecoli:CP002970:332756-333889:1134	(Bla)Penicillin_Binding_Protein_Ecoli:CP002291:664439-666340:1902	(Bla)ampH_Ecoli:AP012030:395554-396711:1158			(Bla)blaBIL-1:X74512:127-1272:1146	(Bla)blaCMY-44:FJ437066:1-1134:1134	(Bla)blaLAT-1:X78117:122-1287:1146	blaCMY-140_1_KX354367						A	2
ECL22749	(Bla)AmpC1_Ecoli:FN649414:2765051-2766355:1302	(Bla)AmpC2_Ecoli:CP002970:332756-333889:1134	(Bla)Penicillin_Binding_Protein_Ecoli:CP002291:664439-666340:1902	(Bla)ampH_Ecoli:AP012030:395554-396711:1158									(Bla)blaCTX-M-1:X92506:63-938:866	blaCTX-M-146_1_KY938173		C
ECL22774	(Bla)AmpC1_Ecoli:FN649414:2765051-2766355:1302	(Bla)AmpC2_Ecoli:CP002970:332756-333889:1134	(Bla)Penicillin_Binding_Protein_Ecoli:CP002291:664439-666340:1902	(Bla)ampH_Ecoli:AP012030:395554-396711:1158												E
ECL22800	(Bla)AmpC1_Ecoli:FN649414:2765051-2766355:1302	(Bla)AmpC2_Ecoli:CP002970:332756-333889:1134	(Bla)Penicillin_Binding_Protein_Ecoli:CP002291:664439-666340:1902	(Bla)ampH_Ecoli:AP012030:395554-396711:1158	(Bla)blaTEM-105:AF516720:215-1075:861	blaTEM-1B_1_AY458016										A	1
ECL22867	(Bla)AmpC1_Ecoli:FN649414:2765051-2766355:1302	(Bla)AmpC2_Ecoli:CP002970:332756-333889:1134	(Bla)Penicillin_Binding_Protein_Ecoli:CP002291:664439-666340:1902	(Bla)ampH_Ecoli:AP012030:395554-396711:1158	(Bla)blaTEM-105:AF516720:215-1075:861	blaTEM-1B_1_AY458016										A	11
ECL22868	(Bla)AmpC1_Ecoli:FN649414:2765051-2766355:1302	(Bla)AmpC2_Ecoli:CP002970:332756-333889:1134	(Bla)Penicillin_Binding_Protein_Ecoli:CP002291:664439-666340:1902	(Bla)ampH_Ecoli:AP012030:395554-396711:1158	(Bla)blaTEM-105:AF516720:215-1075:861	blaTEM-1B_1_AY458016										A	11
ECL22882	(Bla)AmpC1_Ecoli:FN649414:2765051-2766355:1302	(Bla)AmpC2_Ecoli:CP002970:332756-333889:1134	(Bla)Penicillin_Binding_Protein_Ecoli:CP002291:664439-666340:1902	(Bla)ampH_Ecoli:AP012030:395554-396711:1158												C
ECL22887	(Bla)AmpC1_Ecoli:FN649414:2765051-2766355:1302	(Bla)AmpC2_Ecoli:CP002970:332756-333889:1134	(Bla)Penicillin_Binding_Protein_Ecoli:CP002291:664439-666340:1902	(Bla)ampH_Ecoli:AP012030:395554-396711:1158	(Bla)blaTEM-105:AF516720:215-1075:861	blaTEM-1B_1_AY458016										A	1
ECL22967	(Bla)AmpC1_Ecoli:FN649414:2765051-2766355:1302	(Bla)AmpC2_Ecoli:CP002970:332756-333889:1134	(Bla)Penicillin_Binding_Protein_Ecoli:CP002291:664439-666340:1902	(Bla)ampH_Ecoli:AP012030:395554-396711:1158	(Bla)blaTEM-105:AF516720:215-1075:861	blaTEM-1B_1_AY458016	(Bla)blaBIL-1:X74512:127-1272:1146	(Bla)blaCMY-111:KJ155695:1-1146:1146	(Bla)blaLAT-1:X78117:122-1287:1146	blaCMY-2_1_X91840						A	1
ECL23013	(Bla)AmpC1_Ecoli:FN649414:2765051-2766355:1302	(Bla)AmpC2_Ecoli:CP002970:332756-333889:1134	(Bla)Penicillin_Binding_Protein_Ecoli:CP002291:664439-666340:1902	(Bla)ampH_Ecoli:AP012030:395554-396711:1158	(Bla)blaTEM-105:AF516720:215-1075:861	blaTEM-1B_1_AY458016	(Bla)blaBIL-1:X74512:127-1272:1146	(Bla)blaCMY-111:KJ155695:1-1146:1146	(Bla)blaLAT-1:X78117:122-1287:1146	blaCMY-2_1_X91840			(Bla)blaCTX-M-1:X92506:63-938:866	blaCTX-M-146_1_KY938173		A	1
ECL23067	(Bla)AmpC1_Ecoli:FN649414:2765051-2766355:1302	(Bla)AmpC2_Ecoli:CP002970:332756-333889:1134	(Bla)Penicillin_Binding_Protein_Ecoli:CP002291:664439-666340:1902	(Bla)ampH_Ecoli:AP012030:395554-396711:1158	(Bla)blaTEM-105:AF516720:215-1075:861	blaTEM-1B_1_AY458016										A	1
ECL85531	(Bla)AmpC1_Ecoli:FN649414:2765051-2766355:1302	(Bla)AmpC2_Ecoli:CP002970:332756-333889:1134	(Bla)Penicillin_Binding_Protein_Ecoli:CP002291:664439-666340:1902	(Bla)ampH_Ecoli:AP012030:395554-396711:1158												A	2
SRR11045320	(Bla)AmpC1_Ecoli:FN649414:2765051-2766355:1302	(Bla)AmpC2_Ecoli:CP002970:332756-333889:1134	(Bla)Penicillin_Binding_Protein_Ecoli:CP002291:664439-666340:1902	(Bla)ampH_Ecoli:AP012030:395554-396711:1158	(Bla)blaTEM-105:AF516720:215-1075:861	blaTEM-1B_1_AY458016										A
SRR11045323	(Bla)AmpC1_Ecoli:FN649414:2765051-2766355:1302	(Bla)AmpC2_Ecoli:CP002970:332756-333889:1134	(Bla)Penicillin_Binding_Protein_Ecoli:CP002291:664439-666340:1902	(Bla)ampH_Ecoli:AP012030:395554-396711:1158	(Bla)blaTEM-105:AF516720:215-1075:861	blaTEM-1B_1_AY458016										A
SRR11045324	(Bla)AmpC1_Ecoli:FN649414:2765051-2766355:1302	(Bla)AmpC2_Ecoli:CP002970:332756-333889:1134	(Bla)Penicillin_Binding_Protein_Ecoli:CP002291:664439-666340:1902	(Bla)ampH_Ecoli:AP012030:395554-396711:1158	(Bla)blaTEM-105:AF516720:215-1075:861	blaTEM-1B_1_AY458016										A
SRR11046294	(Bla)AmpC1_Ecoli:FN649414:2765051-2766355:1302	(Bla)AmpC2_Ecoli:CP002970:332756-333889:1134	(Bla)Penicillin_Binding_Protein_Ecoli:CP002291:664439-666340:1902	(Bla)ampH_Ecoli:AP012030:395554-396711:1158	(Bla)blaTEM-150:AM183304:209-1069:861	blaTEM-1A_1_HM749966										A
SRR11046297	(Bla)AmpC1_Ecoli:FN649414:2765051-2766355:1302	(Bla)AmpC2_Ecoli:CP002970:332756-333889:1134	(Bla)Penicillin_Binding_Protein_Ecoli:CP002291:664439-666340:1902	(Bla)ampH_Ecoli:AP012030:395554-396711:1158	(Bla)blaTEM-105:AF516720:215-1075:861	blaTEM-1B_1_AY458016										A
SRR11046300	(Bla)AmpC1_Ecoli:FN649414:2765051-2766355:1302	(Bla)AmpC2_Ecoli:CP002970:332756-333889:1134	(Bla)Penicillin_Binding_Protein_Ecoli:CP002291:664439-666340:1902	(Bla)ampH_Ecoli:AP012030:395554-396711:1158	(Bla)blaTEM-105:AF516720:215-1075:861	blaTEM-1B_1_AY458016										A
SRR11046301	(Bla)AmpC1_Ecoli:FN649414:2765051-2766355:1302	(Bla)AmpC2_Ecoli:CP002970:332756-333889:1134	(Bla)Penicillin_Binding_Protein_Ecoli:CP002291:664439-666340:1902	(Bla)ampH_Ecoli:AP012030:395554-396711:1158	(Bla)blaTEM-105:AF516720:215-1075:861	blaTEM-1B_1_AY458016										A
SRR11046303	(Bla)AmpC1_Ecoli:FN649414:2765051-2766355:1302	(Bla)AmpC2_Ecoli:CP002970:332756-333889:1134	(Bla)Penicillin_Binding_Protein_Ecoli:CP002291:664439-666340:1902	(Bla)ampH_Ecoli:AP012030:395554-396711:1158	(Bla)blaTEM-105:AF516720:215-1075:861	blaTEM-1B_1_AY458016										A
SRR11046874	(Bla)AmpC1_Ecoli:FN649414:2765051-2766355:1302	(Bla)AmpC2_Ecoli:CP002970:332756-333889:1134	(Bla)Penicillin_Binding_Protein_Ecoli:CP002291:664439-666340:1902	(Bla)ampH_Ecoli:AP012030:395554-396711:1158	(Bla)blaTEM-105:AF516720:215-1075:861	blaTEM-1B_1_AY458016										A
SRR11046875	(Bla)AmpC1_Ecoli:FN649414:2765051-2766355:1302	(Bla)AmpC2_Ecoli:CP002970:332756-333889:1134	(Bla)Penicillin_Binding_Protein_Ecoli:CP002291:664439-666340:1902	(Bla)ampH_Ecoli:AP012030:395554-396711:1158	(Bla)blaTEM-105:AF516720:215-1075:861	blaTEM-1B_1_AY458016										A
SRR11046877	(Bla)AmpC1_Ecoli:FN649414:2765051-2766355:1302	(Bla)AmpC2_Ecoli:CP002970:332756-333889:1134	(Bla)Penicillin_Binding_Protein_Ecoli:CP002291:664439-666340:1902	(Bla)ampH_Ecoli:AP012030:395554-396711:1158	(Bla)blaTEM-105:AF516720:215-1075:861	blaTEM-1B_1_AY458016										A
SRR11046878	(Bla)AmpC1_Ecoli:FN649414:2765051-2766355:1302	(Bla)AmpC2_Ecoli:CP002970:332756-333889:1134	(Bla)Penicillin_Binding_Protein_Ecoli:CP002291:664439-666340:1902	(Bla)ampH_Ecoli:AP012030:395554-396711:1158	(Bla)blaTEM-105:AF516720:215-1075:861	blaTEM-1B_1_AY458016										A
SRR11047446	(Bla)AmpC1_Ecoli:FN649414:2765051-2766355:1302	(Bla)AmpC2_Ecoli:CP002970:332756-333889:1134	(Bla)Penicillin_Binding_Protein_Ecoli:CP002291:664439-666340:1902	(Bla)ampH_Ecoli:AP012030:395554-396711:1158			(Bla)blaBIL-1:X74512:127-1272:1146	(Bla)blaCMY-111:KJ155695:1-1146:1146	(Bla)blaLAT-1:X78117:122-1287:1146	blaCMY-2_1_X91840						A
SRR11048585	(Bla)AmpC1_Ecoli:FN649414:2765051-2766355:1302	(Bla)AmpC2_Ecoli:CP002970:332756-333889:1134	(Bla)Penicillin_Binding_Protein_Ecoli:CP002291:664439-666340:1902	(Bla)ampH_Ecoli:AP012030:395554-396711:1158	(Bla)blaTEM-105:AF516720:215-1075:861	blaTEM-1B_1_AY458016										A
SRR11048588	(Bla)AmpC1_Ecoli:FN649414:2765051-2766355:1302	(Bla)AmpC2_Ecoli:CP002970:332756-333889:1134	(Bla)Penicillin_Binding_Protein_Ecoli:CP002291:664439-666340:1902	(Bla)ampH_Ecoli:AP012030:395554-396711:1158	(Bla)blaTEM-105:AF516720:215-1075:861	blaTEM-1B_1_AY458016										A
SRR11048592	(Bla)AmpC1_Ecoli:FN649414:2765051-2766355:1302	(Bla)AmpC2_Ecoli:CP002970:332756-333889:1134	(Bla)Penicillin_Binding_Protein_Ecoli:CP002291:664439-666340:1902	(Bla)ampH_Ecoli:AP012030:395554-396711:1158	(Bla)blaTEM-105:AF516720:215-1075:861	blaTEM-1B_1_AY458016	(Bla)blaBIL-1:X74512:127-1272:1146	(Bla)blaCMY-111:KJ155695:1-1146:1146	(Bla)blaLAT-1:X78117:122-1287:1146	blaCMY-2_1_X91840						A
SRR11048595	(Bla)AmpC1_Ecoli:FN649414:2765051-2766355:1302	(Bla)AmpC2_Ecoli:CP002970:332756-333889:1134	(Bla)Penicillin_Binding_Protein_Ecoli:CP002291:664439-666340:1902	(Bla)ampH_Ecoli:AP012030:395554-396711:1158	(Bla)blaTEM-105:AF516720:215-1075:861	blaTEM-1B_1_AY458016										A
SRR11048596	(Bla)AmpC1_Ecoli:FN649414:2765051-2766355:1302	(Bla)AmpC2_Ecoli:CP002970:332756-333889:1134	(Bla)Penicillin_Binding_Protein_Ecoli:CP002291:664439-666340:1902	(Bla)ampH_Ecoli:AP012030:395554-396711:1158	(Bla)blaTEM-105:AF516720:215-1075:861	blaTEM-1B_1_AY458016										A
SRR11074150	(Bla)AmpC1_Ecoli:FN649414:2765051-2766355:1302	(Bla)AmpC2_Ecoli:CP002970:332756-333889:1134	(Bla)Penicillin_Binding_Protein_Ecoli:CP002291:664439-666340:1902	(Bla)ampH_Ecoli:AP012030:395554-396711:1158	(Bla)blaTEM-105:AF516720:215-1075:861	blaTEM-1B_1_AY458016										A
SRR11074152	(Bla)AmpC1_Ecoli:FN649414:2765051-2766355:1302	(Bla)AmpC2_Ecoli:CP002970:332756-333889:1134	(Bla)Penicillin_Binding_Protein_Ecoli:CP002291:664439-666340:1902	(Bla)ampH_Ecoli:AP012030:395554-396711:1158	(Bla)blaTEM-105:AF516720:215-1075:861	blaTEM-1B_1_AY458016	(Bla)blaBIL-1:X74512:127-1272:1146	(Bla)blaCMY-111:KJ155695:1-1146:1146	(Bla)blaLAT-1:X78117:122-1287:1146	blaCMY-2_1_X91840						A
SRR11074153	(Bla)AmpC1_Ecoli:FN649414:2765051-2766355:1302	(Bla)AmpC2_Ecoli:CP002970:332756-333889:1134	(Bla)Penicillin_Binding_Protein_Ecoli:CP002291:664439-666340:1902	(Bla)ampH_Ecoli:AP012030:395554-396711:1158	(Bla)blaTEM-105:AF516720:215-1075:861	blaTEM-1B_1_AY458016	(Bla)blaBIL-1:X74512:127-1272:1146	(Bla)blaCMY-111:KJ155695:1-1146:1146	(Bla)blaLAT-1:X78117:122-1287:1146	blaCMY-2_1_X91840						A
SRR11074174	(Bla)AmpC1_Ecoli:FN649414:2765051-2766355:1302	(Bla)AmpC2_Ecoli:CP002970:332756-333889:1134	(Bla)Penicillin_Binding_Protein_Ecoli:CP002291:664439-666340:1902	(Bla)ampH_Ecoli:AP012030:395554-396711:1158												A
SRR11074676	(Bla)AmpC1_Ecoli:FN649414:2765051-2766355:1302	(Bla)AmpC2_Ecoli:CP002970:332756-333889:1134	(Bla)Penicillin_Binding_Protein_Ecoli:CP002291:664439-666340:1902	(Bla)ampH_Ecoli:AP012030:395554-396711:1158	(Bla)blaTEM-105:AF516720:215-1075:861	blaTEM-1B_1_AY458016										A
SRR11074677	(Bla)AmpC1_Ecoli:FN649414:2765051-2766355:1302	(Bla)AmpC2_Ecoli:CP002970:332756-333889:1134	(Bla)Penicillin_Binding_Protein_Ecoli:CP002291:664439-666340:1902	(Bla)ampH_Ecoli:AP012030:395554-396711:1158	(Bla)blaTEM-105:AF516720:215-1075:861	blaTEM-1B_1_AY458016										A
SRR11074679	(Bla)AmpC1_Ecoli:FN649414:2765051-2766355:1302	(Bla)AmpC2_Ecoli:CP002970:332756-333889:1134	(Bla)Penicillin_Binding_Protein_Ecoli:CP002291:664439-666340:1902	(Bla)ampH_Ecoli:AP012030:395554-396711:1158	(Bla)blaTEM-105:AF516720:215-1075:861	blaTEM-1B_1_AY458016										A
SRR11074680	(Bla)AmpC1_Ecoli:FN649414:2765051-2766355:1302	(Bla)AmpC2_Ecoli:CP002970:332756-333889:1134	(Bla)Penicillin_Binding_Protein_Ecoli:CP002291:664439-666340:1902	(Bla)ampH_Ecoli:AP012030:395554-396711:1158	(Bla)blaTEM-105:AF516720:215-1075:861	blaTEM-1B_1_AY458016										A
SRR11074681	(Bla)AmpC1_Ecoli:FN649414:2765051-2766355:1302	(Bla)AmpC2_Ecoli:CP002970:332756-333889:1134	(Bla)Penicillin_Binding_Protein_Ecoli:CP002291:664439-666340:1902	(Bla)ampH_Ecoli:AP012030:395554-396711:1158	(Bla)blaTEM-105:AF516720:215-1075:861	blaTEM-1B_1_AY458016										A
SRR11074684	(Bla)AmpC1_Ecoli:FN649414:2765051-2766355:1302	(Bla)AmpC2_Ecoli:CP002970:332756-333889:1134	(Bla)Penicillin_Binding_Protein_Ecoli:CP002291:664439-666340:1902	(Bla)ampH_Ecoli:AP012030:395554-396711:1158	(Bla)blaTEM-105:AF516720:215-1075:861	blaTEM-1B_1_AY458016	(Bla)blaBIL-1:X74512:127-1272:1146	(Bla)blaCMY-111:KJ155695:1-1146:1146	(Bla)blaLAT-1:X78117:122-1287:1146	blaCMY-2_1_X91840						A
SRR11074686	(Bla)AmpC1_Ecoli:FN649414:2765051-2766355:1302	(Bla)AmpC2_Ecoli:CP002970:332756-333889:1134	(Bla)Penicillin_Binding_Protein_Ecoli:CP002291:664439-666340:1902	(Bla)ampH_Ecoli:AP012030:395554-396711:1158	(Bla)blaTEM-105:AF516720:215-1075:861	blaTEM-1B_1_AY458016	(Bla)blaBIL-1:X74512:127-1272:1146	(Bla)blaCMY-111:KJ155695:1-1146:1146	(Bla)blaLAT-1:X78117:122-1287:1146	blaCMY-2_1_X91840						A
SRR11074688	(Bla)AmpC1_Ecoli:FN649414:2765051-2766355:1302	(Bla)AmpC2_Ecoli:CP002970:332756-333889:1134	(Bla)Penicillin_Binding_Protein_Ecoli:CP002291:664439-666340:1902	(Bla)ampH_Ecoli:AP012030:395554-396711:1158	(Bla)blaTEM-105:AF516720:215-1075:861	blaTEM-1B_1_AY458016										A
SRR11074697	(Bla)AmpC1_Ecoli:FN649414:2765051-2766355:1302	(Bla)AmpC2_Ecoli:CP002970:332756-333889:1134	(Bla)Penicillin_Binding_Protein_Ecoli:CP002291:664439-666340:1902	(Bla)ampH_Ecoli:AP012030:395554-396711:1158	(Bla)blaTEM-206:KC783461:1-861:861	blaTEM-1B_1_AY458016	(Bla)blaBIL-1:X74512:127-1272:1146	(Bla)blaCMY-111:KJ155695:1-1146:1146	(Bla)blaLAT-1:X78117:122-1287:1146	blaCMY-2_1_X91840						A
SRR11074704	(Bla)AmpC1_Ecoli:FN649414:2765051-2766355:1302	(Bla)AmpC2_Ecoli:CP002970:332756-333889:1134	(Bla)Penicillin_Binding_Protein_Ecoli:CP002291:664439-666340:1902	(Bla)ampH_Ecoli:AP012030:395554-396711:1158	(Bla)blaTEM-105:AF516720:215-1075:861	blaTEM-1B_1_AY458016										A
SRR11074708	(Bla)AmpC1_Ecoli:FN649414:2765051-2766355:1302	(Bla)AmpC2_Ecoli:CP002970:332756-333889:1134	(Bla)Penicillin_Binding_Protein_Ecoli:CP002291:664439-666340:1902	(Bla)ampH_Ecoli:AP012030:395554-396711:1158	(Bla)blaTEM-105:AF516720:215-1075:861	blaTEM-1B_1_AY458016	(Bla)blaBIL-1:X74512:127-1272:1146	(Bla)blaCMY-111:KJ155695:1-1146:1146	(Bla)blaLAT-1:X78117:122-1287:1146	blaCMY-2_1_X91840						A
SRR11074710	(Bla)AmpC1_Ecoli:FN649414:2765051-2766355:1302	(Bla)AmpC2_Ecoli:CP002970:332756-333889:1134	(Bla)Penicillin_Binding_Protein_Ecoli:CP002291:664439-666340:1902	(Bla)ampH_Ecoli:AP012030:395554-396711:1158	(Bla)blaTEM-105:AF516720:215-1075:861	blaTEM-1B_1_AY458016										A
SRR11074716	(Bla)AmpC1_Ecoli:FN649414:2765051-2766355:1302	(Bla)AmpC2_Ecoli:CP002970:332756-333889:1134	(Bla)Penicillin_Binding_Protein_Ecoli:CP002291:664439-666340:1902	(Bla)ampH_Ecoli:AP012030:395554-396711:1158	(Bla)blaTEM-105:AF516720:215-1075:861	blaTEM-1B_1_AY458016										A
SRR6121969	(Bla)AmpC1_Ecoli:FN649414:2765051-2766355:1302	(Bla)AmpC2_Ecoli:CP002970:332756-333889:1134	(Bla)Penicillin_Binding_Protein_Ecoli:CP002291:664439-666340:1902	(Bla)ampH_Ecoli:AP012030:395554-396711:1158	(Bla)blaTEM-105:AF516720:215-1075:861	blaTEM-1B_1_AY458016										A
SRR7213569	(Bla)AmpC1_Ecoli:FN649414:2765051-2766355:1302	(Bla)AmpC2_Ecoli:CP002970:332756-333889:1134	(Bla)Penicillin_Binding_Protein_Ecoli:CP002291:664439-666340:1902	(Bla)ampH_Ecoli:AP012030:395554-396711:1158	(Bla)blaTEM-105:AF516720:215-1075:861	blaTEM-1B_1_AY458016	(Bla)blaBIL-1:X74512:127-1272:1146	(Bla)blaCMY-111:KJ155695:1-1146:1146	(Bla)blaLAT-1:X78117:122-1287:1146	blaCMY-2_1_X91840						A
SRR7213570	(Bla)AmpC1_Ecoli:FN649414:2765051-2766355:1302	(Bla)AmpC2_Ecoli:CP002970:332756-333889:1134	(Bla)Penicillin_Binding_Protein_Ecoli:CP002291:664439-666340:1902	(Bla)ampH_Ecoli:AP012030:395554-396711:1158	(Bla)blaTEM-105:AF516720:215-1075:861	blaTEM-1B_1_AY458016										A
SRR7213571	(Bla)AmpC1_Ecoli:FN649414:2765051-2766355:1302	(Bla)AmpC2_Ecoli:CP002970:332756-333889:1134	(Bla)Penicillin_Binding_Protein_Ecoli:CP002291:664439-666340:1902	(Bla)ampH_Ecoli:AP012030:395554-396711:1158	(Bla)blaTEM-105:AF516720:215-1075:861	blaTEM-1B_1_AY458016										A
SRR7213572	(Bla)AmpC1_Ecoli:FN649414:2765051-2766355:1302	(Bla)AmpC2_Ecoli:CP002970:332756-333889:1134	(Bla)Penicillin_Binding_Protein_Ecoli:CP002291:664439-666340:1902	(Bla)ampH_Ecoli:AP012030:395554-396711:1158	(Bla)blaTEM-105:AF516720:215-1075:861	blaTEM-1B_1_AY458016										A
SRR7213573	(Bla)AmpC1_Ecoli:FN649414:2765051-2766355:1302	(Bla)AmpC2_Ecoli:CP002970:332756-333889:1134	(Bla)Penicillin_Binding_Protein_Ecoli:CP002291:664439-666340:1902	(Bla)ampH_Ecoli:AP012030:395554-396711:1158												A
SRR7213575	(Bla)AmpC1_Ecoli:FN649414:2765051-2766355:1302	(Bla)AmpC2_Ecoli:CP002970:332756-333889:1134	(Bla)Penicillin_Binding_Protein_Ecoli:CP002291:664439-666340:1902	(Bla)ampH_Ecoli:AP012030:395554-396711:1158	(Bla)blaTEM-105:AF516720:215-1075:861	blaTEM-1B_1_AY458016										A
SRR7213576	(Bla)AmpC1_Ecoli:FN649414:2765051-2766355:1302	(Bla)AmpC2_Ecoli:CP002970:332756-333889:1134	(Bla)Penicillin_Binding_Protein_Ecoli:CP002291:664439-666340:1902	(Bla)ampH_Ecoli:AP012030:395554-396711:1158	(Bla)blaTEM-105:AF516720:215-1075:861	blaTEM-1B_1_AY458016										A
SRR7213578	(Bla)AmpC1_Ecoli:FN649414:2765051-2766355:1302	(Bla)AmpC2_Ecoli:CP002970:332756-333889:1134	(Bla)Penicillin_Binding_Protein_Ecoli:CP002291:664439-666340:1902	(Bla)ampH_Ecoli:AP012030:395554-396711:1158	(Bla)blaTEM-141:AY956335:39-899:861	blaTEM-1B_1_AY458016										A
SRR7213579	(Bla)AmpC1_Ecoli:FN649414:2765051-2766355:1302	(Bla)AmpC2_Ecoli:CP002970:332756-333889:1134	(Bla)Penicillin_Binding_Protein_Ecoli:CP002291:664439-666340:1902	(Bla)ampH_Ecoli:AP012030:395554-396711:1158	(Bla)blaTEM-105:AF516720:215-1075:861	blaTEM-1B_1_AY458016										A
SRR7213581	(Bla)AmpC1_Ecoli:FN649414:2765051-2766355:1302	(Bla)AmpC2_Ecoli:CP002970:332756-333889:1134	(Bla)Penicillin_Binding_Protein_Ecoli:CP002291:664439-666340:1902	(Bla)ampH_Ecoli:AP012030:395554-396711:1158	(Bla)blaTEM-105:AF516720:215-1075:861	blaTEM-1B_1_AY458016										A
SRR7213583	(Bla)AmpC1_Ecoli:FN649414:2765051-2766355:1302	(Bla)AmpC2_Ecoli:CP002970:332756-333889:1134	(Bla)Penicillin_Binding_Protein_Ecoli:CP002291:664439-666340:1902	(Bla)ampH_Ecoli:AP012030:395554-396711:1158	(Bla)blaTEM-105:AF516720:215-1075:861	blaTEM-1B_1_AY458016										A
SRR7213588	(Bla)AmpC1_Ecoli:FN649414:2765051-2766355:1302	(Bla)AmpC2_Ecoli:CP002970:332756-333889:1134	(Bla)Penicillin_Binding_Protein_Ecoli:CP002291:664439-666340:1902	(Bla)ampH_Ecoli:AP012030:395554-396711:1158	(Bla)blaTEM-105:AF516720:215-1075:861	blaTEM-1B_1_AY458016							(Bla)blaCTX-M-32:AJ557142:1-876:876	blaCTX-M-146_1_KY938173		A
SRR7213590	(Bla)AmpC1_Ecoli:FN649414:2765051-2766355:1302	(Bla)AmpC2_Ecoli:CP002970:332756-333889:1134	(Bla)Penicillin_Binding_Protein_Ecoli:CP002291:664439-666340:1902	(Bla)ampH_Ecoli:AP012030:395554-396711:1158	(Bla)blaTEM-105:AF516720:215-1075:861	blaTEM-1B_1_AY458016										A
SRR7213593	(Bla)AmpC1_Ecoli:FN649414:2765051-2766355:1302	(Bla)AmpC2_Ecoli:CP002970:332756-333889:1134	(Bla)Penicillin_Binding_Protein_Ecoli:CP002291:664439-666340:1902	(Bla)ampH_Ecoli:AP012030:395554-396711:1158												A
SRR7213595	(Bla)AmpC1_Ecoli:FN649414:2765051-2766355:1302	(Bla)AmpC2_Ecoli:CP002970:332756-333889:1134	(Bla)Penicillin_Binding_Protein_Ecoli:CP002291:664439-666340:1902	(Bla)ampH_Ecoli:AP012030:395554-396711:1158	(Bla)blaTEM-105:AF516720:215-1075:861	blaTEM-1B_1_AY458016										A
SRR7213596	(Bla)AmpC1_Ecoli:FN649414:2765051-2766355:1302	(Bla)AmpC2_Ecoli:CP002970:332756-333889:1134	(Bla)Penicillin_Binding_Protein_Ecoli:CP002291:664439-666340:1902	(Bla)ampH_Ecoli:AP012030:395554-396711:1158	(Bla)blaTEM-105:AF516720:215-1075:861	blaTEM-1B_1_AY458016	(Bla)blaBIL-1:X74512:127-1272:1146	(Bla)blaCMY-111:KJ155695:1-1146:1146	(Bla)blaLAT-1:X78117:122-1287:1146	blaCMY-2_1_X91840						A
SRR7213597	(Bla)AmpC1_Ecoli:FN649414:2765051-2766355:1302	(Bla)AmpC2_Ecoli:CP002970:332756-333889:1134	(Bla)Penicillin_Binding_Protein_Ecoli:CP002291:664439-666340:1902	(Bla)ampH_Ecoli:AP012030:395554-396711:1158	(Bla)blaTEM-105:AF516720:215-1075:861	blaTEM-1B_1_AY458016										A
SRR7213598	(Bla)AmpC1_Ecoli:FN649414:2765051-2766355:1302	(Bla)AmpC2_Ecoli:CP002970:332756-333889:1134	(Bla)Penicillin_Binding_Protein_Ecoli:CP002291:664439-666340:1902	(Bla)ampH_Ecoli:AP012030:395554-396711:1158	(Bla)blaTEM-105:AF516720:215-1075:861	blaTEM-1B_1_AY458016	(Bla)blaBIL-1:X74512:127-1272:1146	(Bla)blaCMY-111:KJ155695:1-1146:1146	(Bla)blaLAT-1:X78117:122-1287:1146	blaCMY-2_1_X91840						A
SRR7213599	(Bla)AmpC1_Ecoli:FN649414:2765051-2766355:1302	(Bla)AmpC2_Ecoli:CP002970:332756-333889:1134	(Bla)Penicillin_Binding_Protein_Ecoli:CP002291:664439-666340:1902	(Bla)ampH_Ecoli:AP012030:395554-396711:1158	(Bla)blaTEM-105:AF516720:215-1075:861	blaTEM-1B_1_AY458016										A
SRR7213600	(Bla)AmpC1_Ecoli:FN649414:2765051-2766355:1302	(Bla)AmpC2_Ecoli:CP002970:332756-333889:1134	(Bla)Penicillin_Binding_Protein_Ecoli:CP002291:664439-666340:1902	(Bla)ampH_Ecoli:AP012030:395554-396711:1158	(Bla)blaTEM-105:AF516720:215-1075:861	blaTEM-1B_1_AY458016										A
SRR7213602	(Bla)AmpC1_Ecoli:FN649414:2765051-2766355:1302	(Bla)AmpC2_Ecoli:CP002970:332756-333889:1134	(Bla)Penicillin_Binding_Protein_Ecoli:CP002291:664439-666340:1902	(Bla)ampH_Ecoli:AP012030:395554-396711:1158	(Bla)blaTEM-105:AF516720:215-1075:861	blaTEM-1B_1_AY458016	(Bla)blaBIL-1:X74512:127-1272:1146	(Bla)blaCMY-111:KJ155695:1-1146:1146	(Bla)blaLAT-1:X78117:122-1287:1146	blaCMY-2_1_X91840						A
SRR7213603	(Bla)AmpC1_Ecoli:FN649414:2765051-2766355:1302	(Bla)AmpC2_Ecoli:CP002970:332756-333889:1134	(Bla)Penicillin_Binding_Protein_Ecoli:CP002291:664439-666340:1902	(Bla)ampH_Ecoli:AP012030:395554-396711:1158	(Bla)blaTEM-105:AF516720:215-1075:861	blaTEM-1B_1_AY458016										A
SRR7213606	(Bla)AmpC1_Ecoli:FN649414:2765051-2766355:1302	(Bla)AmpC2_Ecoli:CP002970:332756-333889:1134	(Bla)Penicillin_Binding_Protein_Ecoli:CP002291:664439-666340:1902	(Bla)ampH_Ecoli:AP012030:395554-396711:1158	(Bla)blaTEM-105:AF516720:215-1075:861	blaTEM-1B_1_AY458016										A
SRR7213607	(Bla)AmpC1_Ecoli:FN649414:2765051-2766355:1302	(Bla)AmpC2_Ecoli:CP002970:332756-333889:1134	(Bla)Penicillin_Binding_Protein_Ecoli:CP002291:664439-666340:1902	(Bla)ampH_Ecoli:AP012030:395554-396711:1158	(Bla)blaTEM-105:AF516720:215-1075:861	blaTEM-1B_1_AY458016										A
SRR7213608	(Bla)AmpC1_Ecoli:FN649414:2765051-2766355:1302	(Bla)AmpC2_Ecoli:CP002970:332756-333889:1134	(Bla)Penicillin_Binding_Protein_Ecoli:CP002291:664439-666340:1902	(Bla)ampH_Ecoli:AP012030:395554-396711:1158	(Bla)blaTEM-105:AF516720:215-1075:861	blaTEM-1B_1_AY458016										A
SRR7213623	(Bla)AmpC1_Ecoli:FN649414:2765051-2766355:1302	(Bla)AmpC2_Ecoli:CP002970:332756-333889:1134	(Bla)Penicillin_Binding_Protein_Ecoli:CP002291:664439-666340:1902	(Bla)ampH_Ecoli:AP012030:395554-396711:1158	(Bla)blaTEM-105:AF516720:215-1075:861	blaTEM-1B_1_AY458016										A
SRR7213658	(Bla)AmpC1_Ecoli:FN649414:2765051-2766355:1302	(Bla)AmpC2_Ecoli:CP002970:332756-333889:1134	(Bla)Penicillin_Binding_Protein_Ecoli:CP002291:664439-666340:1902	(Bla)ampH_Ecoli:AP012030:395554-396711:1158	(Bla)blaTEM-105:AF516720:215-1075:861	blaTEM-1B_1_AY458016	(Bla)blaBIL-1:X74512:127-1272:1146	(Bla)blaCMY-111:KJ155695:1-1146:1146	(Bla)blaLAT-1:X78117:122-1287:1146	blaCMY-2_1_X91840						A
SRR7213659	(Bla)AmpC1_Ecoli:FN649414:2765051-2766355:1302	(Bla)AmpC2_Ecoli:CP002970:332756-333889:1134	(Bla)Penicillin_Binding_Protein_Ecoli:CP002291:664439-666340:1902	(Bla)ampH_Ecoli:AP012030:395554-396711:1158	(Bla)blaTEM-105:AF516720:215-1075:861	blaTEM-1B_1_AY458016										A
SRR7213660	(Bla)AmpC1_Ecoli:FN649414:2765051-2766355:1302	(Bla)AmpC2_Ecoli:CP002970:332756-333889:1134	(Bla)Penicillin_Binding_Protein_Ecoli:CP002291:664439-666340:1902	(Bla)ampH_Ecoli:AP012030:395554-396711:1158	(Bla)blaTEM-105:AF516720:215-1075:861	blaTEM-1B_1_AY458016									(Bla)blaSCO-1:AM939419:c2458-1592:867	A
SRR8157048	(Bla)AmpC1_Ecoli:FN649414:2765051-2766355:1302	(Bla)AmpC2_Ecoli:CP002970:332756-333889:1134	(Bla)Penicillin_Binding_Protein_Ecoli:CP002291:664439-666340:1902	(Bla)ampH_Ecoli:AP012030:395554-396711:1158												A
SRR8901382	(Bla)AmpC1_Ecoli:FN649414:2765051-2766355:1302	(Bla)AmpC2_Ecoli:CP002970:332756-333889:1134	(Bla)Penicillin_Binding_Protein_Ecoli:CP002291:664439-666340:1902	(Bla)ampH_Ecoli:AP012030:395554-396711:1158	(Bla)blaTEM-105:AF516720:215-1075:861	blaTEM-1B_1_AY458016										A
SRR8901386	(Bla)AmpC1_Ecoli:FN649414:2765051-2766355:1302	(Bla)AmpC2_Ecoli:CP002970:332756-333889:1134	(Bla)Penicillin_Binding_Protein_Ecoli:CP002291:664439-666340:1902	(Bla)ampH_Ecoli:AP012030:395554-396711:1158	(Bla)blaTEM-105:AF516720:215-1075:861	blaTEM-1B_1_AY458016										A
SRR8901388	(Bla)AmpC1_Ecoli:FN649414:2765051-2766355:1302	(Bla)AmpC2_Ecoli:CP002970:332756-333889:1134	(Bla)Penicillin_Binding_Protein_Ecoli:CP002291:664439-666340:1902	(Bla)ampH_Ecoli:AP012030:395554-396711:1158												A
SRR8901392	(Bla)AmpC1_Ecoli:FN649414:2765051-2766355:1302	(Bla)AmpC2_Ecoli:CP002970:332756-333889:1134	(Bla)Penicillin_Binding_Protein_Ecoli:CP002291:664439-666340:1902	(Bla)ampH_Ecoli:AP012030:395554-396711:1158	(Bla)blaTEM-105:AF516720:215-1075:861	blaTEM-1B_1_AY458016										A
SRR8901396	(Bla)AmpC1_Ecoli:FN649414:2765051-2766355:1302	(Bla)AmpC2_Ecoli:CP002970:332756-333889:1134	(Bla)Penicillin_Binding_Protein_Ecoli:CP002291:664439-666340:1902	(Bla)ampH_Ecoli:AP012030:395554-396711:1158	(Bla)blaTEM-105:AF516720:215-1075:861	blaTEM-1B_1_AY458016										A
SRR8901397	(Bla)AmpC1_Ecoli:FN649414:2765051-2766355:1302	(Bla)AmpC2_Ecoli:CP002970:332756-333889:1134	(Bla)Penicillin_Binding_Protein_Ecoli:CP002291:664439-666340:1902	(Bla)ampH_Ecoli:AP012030:395554-396711:1158	(Bla)blaTEM-105:AF516720:215-1075:861	blaTEM-1B_1_AY458016										A
SRR8901398	(Bla)AmpC1_Ecoli:FN649414:2765051-2766355:1302	(Bla)AmpC2_Ecoli:CP002970:332756-333889:1134	(Bla)Penicillin_Binding_Protein_Ecoli:CP002291:664439-666340:1902	(Bla)ampH_Ecoli:AP012030:395554-396711:1158	(Bla)blaTEM-105:AF516720:215-1075:861	blaTEM-1B_1_AY458016										A
SRR8901402	(Bla)AmpC1_Ecoli:FN649414:2765051-2766355:1302	(Bla)AmpC2_Ecoli:CP002970:332756-333889:1134	(Bla)Penicillin_Binding_Protein_Ecoli:CP002291:664439-666340:1902	(Bla)ampH_Ecoli:AP012030:395554-396711:1158												A
SRR8901404	(Bla)AmpC1_Ecoli:FN649414:2765051-2766355:1302	(Bla)AmpC2_Ecoli:CP002970:332756-333889:1134	(Bla)Penicillin_Binding_Protein_Ecoli:CP002291:664439-666340:1902	(Bla)ampH_Ecoli:AP012030:395554-396711:1158	(Bla)blaTEM-105:AF516720:215-1075:861	blaTEM-1B_1_AY458016										A
SRR8901430	(Bla)AmpC1_Ecoli:FN649414:2765051-2766355:1302	(Bla)AmpC2_Ecoli:CP002970:332756-333889:1134	(Bla)Penicillin_Binding_Protein_Ecoli:CP002291:664439-666340:1902	(Bla)ampH_Ecoli:AP012030:395554-396711:1158	(Bla)blaTEM-105:AF516720:215-1075:861	blaTEM-1B_1_AY458016										A
SRR8901439	(Bla)AmpC1_Ecoli:FN649414:2765051-2766355:1302	(Bla)AmpC2_Ecoli:CP002970:332756-333889:1134	(Bla)Penicillin_Binding_Protein_Ecoli:CP002291:664439-666340:1902	(Bla)ampH_Ecoli:AP012030:395554-396711:1158			(Bla)blaBIL-1:X74512:127-1272:1146	(Bla)blaCMY-111:KJ155695:1-1146:1146	(Bla)blaLAT-1:X78117:122-1287:1146	blaCMY-2_1_X91840						A
SRR8901452	(Bla)AmpC1_Ecoli:FN649414:2765051-2766355:1302	(Bla)AmpC2_Ecoli:CP002970:332756-333889:1134	(Bla)Penicillin_Binding_Protein_Ecoli:CP002291:664439-666340:1902	(Bla)ampH_Ecoli:AP012030:395554-396711:1158			(Bla)blaBIL-1:X74512:127-1272:1146	(Bla)blaCMY-111:KJ155695:1-1146:1146	(Bla)blaLAT-1:X78117:122-1287:1146	blaCMY-2_1_X91840						A
SRR9913963	(Bla)AmpC1_Ecoli:FN649414:2765051-2766355:1302	(Bla)AmpC2_Ecoli:CP002970:332756-333889:1134	(Bla)Penicillin_Binding_Protein_Ecoli:CP002291:664439-666340:1902	(Bla)ampH_Ecoli:AP012030:395554-396711:1158	(Bla)blaTEM-105:AF516720:215-1075:861	blaTEM-1B_1_AY458016										A
SRR9914120	(Bla)AmpC1_Ecoli:FN649414:2765051-2766355:1302	(Bla)AmpC2_Ecoli:CP002970:332756-333889:1134	(Bla)Penicillin_Binding_Protein_Ecoli:CP002291:664439-666340:1902	(Bla)ampH_Ecoli:AP012030:395554-396711:1158	(Bla)blaTEM-105:AF516720:215-1075:861	blaTEM-1B_1_AY458016	(Bla)blaBIL-1:X74512:127-1272:1146	(Bla)blaCMY-111:KJ155695:1-1146:1146	(Bla)blaLAT-1:X78117:122-1287:1146	blaCMY-2_1_X91840						A
