# Supplementary material for: High Risk Clone: A Proposal of Criteria Adapted to the One Health Context with Application to Enterotoxigenic Escherichia coli in the Pig Population
Source: Antibiotics (Basel). 2021 Feb 28;10(3):244. doi: 10.3390/antibiotics10030244 (PMC8000703; doi:10.3390/antibiotics10030244)
Supplement: Supplementary file 1 [file antibiotics-10-00244-s001.zip › TableS13_disctancematrix_192isolates.xlsx]

## Sheet: Feuil1
192	ECL19125/1-4496	ECL19146/1-4496	ECL19187/1-4496	ECL19345/1-4496	ECL19373/1-4496	ECL19390/1-4496	ECL19403/1-4496	ECL19414/1-4496	ECL19427/1-4496	ECL19508/1-4496	ECL19517/1-4496	ECL19555/1-4496	ECL19641/1-4496	ECL19664/1-4496	ECL19668/1-4496	ECL19751/1-4496	ECL19755/1-4496	ECL19763/1-4496	ECL19885/1-4496	ECL19889/1-4496	ECL19894/1-4496	ECL19901/1-4496	ECL19902/1-4496	ECL19916/1-4496	ECL19939/1-4496	ECL20013/1-4496	ECL20014/1-4496	ECL20015/1-4496	ECL20018/1-4496	ECL20209/1-4496	ECL20212/1-4496	ECL20239/1-4496	ECL20256/1-4496	ECL20278/1-4496	ECL20290/1-4496	ECL20308/1-4496	ECL20389/1-4496	ECL20404/1-4496	ECL20408/1-4496	ECL20435/1-4496	ECL20436/1-4496	ECL20544/1-4496	ECL20550/1-4496	ECL20566/1-4496	ECL20622/1-4496	ECL20627/1-4496	ECL20721/1-4496	ECL20725/1-4496	ECL20769/1-4496
ECL19664/1-4496	287.01	223.008	270.012	250.986	256.008	245.996	269.014	275.002	276.998	273.006	206.01	222.01	271.01	0	0	234.985	224.007	250.986	256.008	278.995	274.004	272.008	272.008	0.999951	272.008	1.9999	4.99976	0.999951	2.99985	4.99976	0	3.99856	3.99856	3.99856	1.9999	278.995	4.99976	1.9999	228.997	4.99976	6.99904	14.0012	275.002	8.00023	8.00023	0	236.015	2.99985	8.00023
ECL19668/1-4496	287.01	223.008	270.012	250.986	256.008	245.996	269.014	275.002	276.998	273.006	206.01	222.01	271.01	0	0	234.985	224.007	250.986	256.008	278.995	274.004	272.008	272.008	0.999951	272.008	1.9999	4.99976	0.999951	2.99985	4.99976	0	3.99856	3.99856	3.99856	1.9999	278.995	4.99976	1.9999	228.997	4.99976	6.99904	14.0012	275.002	8.00023	8.00023	0	236.015	2.99985	8.00023
ECL20212/1-4496	287.01	223.008	270.012	250.986	256.008	245.996	269.014	275.002	276.998	273.006	206.01	222.01	271.01	0	0	234.985	224.007	250.986	256.008	278.995	274.004	272.008	272.008	0.999951	272.008	1.9999	4.99976	0.999951	2.99985	4.99976	0	3.99856	3.99856	3.99856	1.9999	278.995	4.99976	1.9999	228.997	4.99976	6.99904	14.0012	275.002	8.00023	8.00023	0	236.015	2.99985	8.00023
ECL20627/1-4496	287.01	223.008	270.012	250.986	256.008	245.996	269.014	275.002	276.998	273.006	206.01	222.01	271.01	0	0	234.985	224.007	250.986	256.008	278.995	274.004	272.008	272.008	0.999951	272.008	1.9999	4.99976	0.999951	2.99985	4.99976	0	3.99856	3.99856	3.99856	1.9999	278.995	4.99976	1.9999	228.997	4.99976	6.99904	14.0012	275.002	8.00023	8.00023	0	236.015	2.99985	8.00023
ECL20015/1-4496	288.008	224.007	269.014	249.988	257.006	246.994	270.012	274.004	276	274.004	207.008	223.008	272.008	0.999951	0.999951	236.015	223.008	252.015	255.009	279.993	275.002	271.01	271.01	1.9999	273.006	2.99985	6.00096	0	1.9999	6.00096	0.999951	4.99976	4.99976	2.99985	2.99985	279.993	3.99856	2.99985	229.995	6.00096	6.00096	13	276	9.00143	9.00143	0.999951	237.013	1.9999	6.99904
ECL19916/1-4496	288.008	224.007	271.01	252.015	257.006	246.994	270.012	276	277.996	274.004	207.008	223.008	272.008	0.999951	0.999951	236.015	225.005	252.015	257.006	279.993	275.002	273.006	273.006	0	273.006	2.99985	6.00096	1.9999	3.99856	6.00096	0.999951	4.99976	4.99976	4.99976	2.99985	279.993	6.00096	2.99985	229.995	3.99856	8.00023	14.9993	276	9.00143	9.00143	0.999951	237.013	3.99856	9.00143
ECL20013/1-4496	289.007	225.005	272.008	253.013	258.004	247.992	271.01	276.998	278.995	275.002	208.006	224.007	273.006	1.9999	1.9999	237.013	226.003	253.013	258.004	280.991	276	274.004	274.004	2.99985	274.004	0	4.99976	2.99985	4.99976	6.99904	1.9999	6.00096	6.00096	6.00096	3.99856	280.991	6.99904	3.99856	230.993	6.99904	9.00143	16.0005	276.998	9.99951	9.99951	1.9999	238.011	4.99976	9.99951
ECL20290/1-4496	289.007	225.005	272.008	253.013	258.004	247.992	271.01	276.998	278.995	275.002	208.006	224.007	273.006	1.9999	1.9999	237.013	226.003	253.013	258.004	280.991	276	274.004	274.004	2.99985	274.004	3.99856	6.99904	2.99985	4.99976	2.99985	1.9999	6.00096	6.00096	1.9999	0	280.991	6.99904	0	230.993	6.99904	6.99904	16.0005	276.998	9.99951	8.00023	1.9999	238.011	4.99976	9.99951
ECL20404/1-4496	289.007	225.005	272.008	253.013	258.004	247.992	271.01	276.998	278.995	275.002	208.006	224.007	273.006	1.9999	1.9999	237.013	226.003	253.013	258.004	280.991	276	274.004	274.004	2.99985	274.004	3.99856	6.99904	2.99985	4.99976	2.99985	1.9999	6.00096	6.00096	1.9999	0	280.991	6.99904	0	230.993	6.99904	6.99904	16.0005	276.998	9.99951	8.00023	1.9999	238.011	4.99976	9.99951
ECL20918/1-4496	289.007	225.005	272.008	253.013	258.004	247.992	271.01	276.998	278.995	275.002	208.006	224.007	273.006	1.9999	1.9999	237.013	226.003	253.013	258.004	280.991	276	274.004	274.004	2.99985	274.004	3.99856	6.99904	2.99985	4.99976	6.99904	1.9999	6.00096	6.00096	6.00096	3.99856	280.991	6.99904	3.99856	230.993	6.99904	9.00143	16.0005	276.998	9.99951	9.99951	1.9999	238.011	4.99976	9.99951
ECL20924/1-4496	289.007	225.005	272.008	253.013	258.004	247.992	271.01	276.998	278.995	275.002	208.006	224.007	273.006	1.9999	1.9999	237.013	226.003	253.013	258.004	280.991	276	274.004	274.004	2.99985	274.004	3.99856	6.99904	2.99985	4.99976	4.99976	1.9999	6.00096	6.00096	3.99856	1.9999	280.991	6.99904	1.9999	230.993	6.99904	6.99904	16.0005	276.998	9.99951	8.00023	1.9999	238.011	4.99976	9.99951
ECL21512/1-4496	289.007	225.005	272.008	253.013	258.004	247.992	271.01	276.998	278.995	275.002	208.006	224.007	273.006	1.9999	1.9999	237.013	226.003	253.013	258.004	280.991	276	274.004	274.004	2.99985	274.004	3.99856	6.99904	2.99985	4.99976	6.99904	1.9999	6.00096	6.00096	6.00096	3.99856	280.991	6.99904	3.99856	230.993	6.99904	9.00143	16.0005	276.998	9.99951	9.99951	1.9999	238.011	4.99976	9.99951
ECL20018/1-4496	290.005	226.003	271.01	252.015	259.002	248.99	272.008	276	277.996	276	209.004	225.005	274.004	2.99985	2.99985	238.011	225.005	254.011	257.006	281.989	276.998	273.006	273.006	3.99856	275.002	4.99976	8.00023	1.9999	0	8.00023	2.99985	6.99904	6.99904	4.99976	4.99976	281.989	6.00096	4.99976	231.991	8.00023	8.00023	13	277.996	11.0007	11.0007	2.99985	239.009	3.99856	9.00143
ECL20725/1-4496	290.005	226.003	271.01	252.015	259.002	248.99	272.008	276	277.996	276	209.004	225.005	274.004	2.99985	2.99985	238.011	225.005	254.011	257.006	281.989	276.998	273.006	273.006	3.99856	275.002	4.99976	8.00023	1.9999	3.99856	8.00023	2.99985	6.99904	6.99904	4.99976	4.99976	281.989	6.00096	4.99976	231.991	8.00023	8.00023	14.9993	277.996	11.0007	11.0007	2.99985	239.009	0	9.00143
ECL22800/1-4496	290.005	226.003	271.01	252.015	259.002	248.99	272.008	276	277.996	276	209.004	225.005	274.004	2.99985	2.99985	238.011	225.005	254.011	257.006	281.989	276.998	273.006	273.006	3.99856	275.002	4.99976	8.00023	1.9999	3.99856	8.00023	2.99985	6.99904	6.99904	4.99976	4.99976	281.989	6.00096	4.99976	231.991	8.00023	8.00023	14.9993	277.996	11.0007	11.0007	2.99985	239.009	3.99856	9.00143
ECL20814/1-4496	290.005	226.003	273.006	254.011	259.002	248.99	272.008	277.996	279.993	276	209.004	225.005	274.004	2.99985	2.99985	238.011	227.001	254.011	259.002	281.989	276.998	275.002	275.002	3.99856	275.002	4.99976	8.00023	3.99856	6.00096	8.00023	2.99985	6.99904	6.99904	6.99904	4.99976	281.989	8.00023	4.99976	231.991	8.00023	9.99951	16.9986	277.996	11.0007	11.0007	2.99985	239.009	6.00096	11.0007
ECL20896/1-4496	290.005	226.003	273.006	254.011	259.002	248.99	272.008	277.996	279.993	276	209.004	225.005	274.004	2.99985	2.99985	238.011	227.001	254.011	259.002	281.989	276.998	275.002	275.002	3.99856	275.002	4.99976	8.00023	3.99856	6.00096	8.00023	2.99985	6.99904	6.99904	6.99904	4.99976	281.989	8.00023	4.99976	231.991	8.00023	9.99951	16.9986	277.996	11.0007	11.0007	2.99985	239.009	6.00096	11.0007
ECL22293/1-4496	290.005	226.003	273.006	254.011	259.002	248.99	272.008	277.996	279.993	276	209.004	225.005	274.004	2.99985	2.99985	238.011	227.001	254.011	259.002	281.989	276.998	275.002	275.002	3.99856	275.002	4.99976	8.00023	3.99856	6.00096	8.00023	2.99985	6.99904	6.99904	6.99904	4.99976	281.989	8.00023	4.99976	231.991	8.00023	9.99951	16.9986	277.996	11.0007	11.0007	2.99985	239.009	6.00096	11.0007
ECL20278/1-4496	291.003	227.001	272.008	253.013	260	249.988	273.006	276.998	278.995	276.998	210.002	226.003	275.002	3.99856	3.99856	239.009	226.003	255.009	258.004	282.987	277.996	274.004	274.004	4.99976	276	6.00096	9.00143	2.99985	4.99976	4.99976	3.99856	8.00023	8.00023	0	1.9999	282.987	6.99904	1.9999	232.989	9.00143	6.99904	16.0005	278.995	11.9988	9.99951	3.99856	240.007	4.99976	9.99951
ECL20239/1-4496	291.003	227.001	274.004	255.009	260	249.988	273.006	278.995	280.991	276.998	210.002	226.003	275.002	3.99856	3.99856	239.009	227.999	255.009	260	282.987	277.996	276	276	4.99976	276	6.00096	9.00143	4.99976	6.99904	9.00143	3.99856	0	0	8.00023	6.00096	282.987	9.00143	6.00096	232.989	9.00143	11.0007	17.9997	278.995	9.99951	11.9988	3.99856	240.007	6.99904	11.9988
ECL20256/1-4496	291.003	227.001	274.004	255.009	260	249.988	273.006	278.995	280.991	276.998	210.002	226.003	275.002	3.99856	3.99856	239.009	227.999	255.009	260	282.987	277.996	276	276	4.99976	276	6.00096	9.00143	4.99976	6.99904	9.00143	3.99856	0	0	8.00023	6.00096	282.987	9.00143	6.00096	232.989	9.00143	11.0007	17.9997	278.995	9.99951	11.9988	3.99856	240.007	6.99904	11.9988
ECL20389/1-4496	292.001	227.999	273.006	254.011	260.998	250.986	274.004	277.996	279.993	277.996	211	227.001	276	4.99976	4.99976	240.007	227.001	256.008	259.002	283.985	278.995	275.002	275.002	6.00096	276.998	6.99904	9.99951	3.99856	6.00096	9.99951	4.99976	9.00143	9.00143	6.99904	6.99904	283.985	0	6.99904	233.987	9.99951	9.99951	16.9986	279.993	13	13	4.99976	241.005	6.00096	11.0007
ECL20014/1-4496	292.001	227.999	275.002	256.008	260.998	250.986	274.004	279.993	281.989	277.996	211	227.001	276	4.99976	4.99976	240.007	228.997	256.008	260.998	283.985	278.995	276.998	276.998	6.00096	276.998	4.99976	0	6.00096	8.00023	9.99951	4.99976	9.00143	9.00143	9.00143	6.99904	283.985	9.99951	6.99904	233.987	9.99951	11.9988	19.0009	279.993	13	13	4.99976	241.005	8.00023	13
ECL20209/1-4496	292.001	227.999	275.002	256.008	260.998	250.986	274.004	279.993	281.989	277.996	211	227.001	276	4.99976	4.99976	240.007	228.997	256.008	260.998	283.985	278.995	276.998	276.998	6.00096	276.998	6.99904	9.99951	6.00096	8.00023	0	4.99976	9.00143	9.00143	4.99976	2.99985	283.985	9.99951	2.99985	233.987	9.99951	9.99951	19.0009	279.993	13	11.0007	4.99976	241.005	8.00023	13
ECL20435/1-4496	288.008	227.999	271.01	256.008	257.006	250.986	274.004	279.993	281.989	277.996	211	223.008	276	4.99976	4.99976	240.007	228.997	252.015	257.006	279.993	278.995	273.006	273.006	3.99856	276.998	6.99904	9.99951	6.00096	8.00023	9.99951	4.99976	9.00143	9.00143	9.00143	6.99904	279.993	9.99951	6.99904	233.987	0	8.00023	14.9993	279.993	9.00143	9.00143	4.99976	241.005	8.00023	13
ECL20887/1-4496	292.999	228.997	274.004	255.009	261.996	252.015	275.002	278.995	280.991	278.995	211.998	227.999	276.998	6.00096	6.00096	241.005	227.999	257.006	260	285.014	279.993	276	276	4.99976	277.996	8.00023	11.0007	4.99976	6.99904	11.0007	6.00096	9.99951	9.99951	8.00023	8.00023	285.014	9.00143	8.00023	234.985	9.00143	11.0007	17.9997	280.991	14.0012	14.0012	6.00096	242.003	6.99904	9.99951
ECL22134/1-4496	292.999	228.997	274.004	255.009	261.996	252.015	275.002	278.995	280.991	278.995	211.998	227.999	276.998	6.00096	6.00096	241.005	227.999	257.006	260	285.014	279.993	276	276	6.99904	277.996	8.00023	11.0007	4.99976	6.99904	11.0007	6.00096	9.99951	9.99951	8.00023	8.00023	285.014	9.00143	8.00023	234.985	11.0007	11.0007	17.9997	280.991	14.0012	14.0012	6.00096	242.003	6.99904	9.99951
ECL22274/1-4496	289.007	228.997	270.012	255.009	258.004	252.015	275.002	278.995	280.991	278.995	211.998	224.007	276.998	6.00096	6.00096	241.005	227.999	253.013	256.008	280.991	279.993	272.008	272.008	6.99904	277.996	8.00023	11.0007	4.99976	6.99904	11.0007	6.00096	9.99951	9.99951	8.00023	8.00023	280.991	9.00143	8.00023	234.985	6.99904	6.99904	14.0012	280.991	9.99951	9.99951	6.00096	242.003	6.99904	11.9988
ECL22438/1-4496	289.007	228.997	270.012	255.009	258.004	252.015	275.002	278.995	280.991	278.995	211.998	224.007	276.998	6.00096	6.00096	241.005	227.999	253.013	256.008	280.991	279.993	272.008	272.008	6.99904	277.996	8.00023	11.0007	4.99976	6.99904	11.0007	6.00096	9.99951	9.99951	8.00023	8.00023	280.991	9.00143	8.00023	234.985	6.99904	6.99904	14.0012	280.991	9.99951	9.99951	6.00096	242.003	6.99904	11.9988
ECL21657/1-4496	289.007	228.997	272.008	257.006	258.004	252.015	275.002	280.991	282.987	278.995	211.998	224.007	276.998	6.00096	6.00096	241.005	229.995	253.013	258.004	280.991	279.993	274.004	274.004	4.99976	277.996	8.00023	11.0007	6.99904	9.00143	11.0007	6.00096	9.99951	9.99951	9.99951	8.00023	280.991	11.0007	8.00023	234.985	2.99985	9.00143	16.0005	280.991	9.99951	9.99951	6.00096	242.003	9.00143	14.0012
ECL21676/1-4496	292.999	228.997	276	257.006	261.996	252.015	275.002	280.991	282.987	278.995	211.998	227.999	276.998	6.00096	6.00096	241.005	229.995	257.006	261.996	285.014	279.993	277.996	277.996	4.99976	277.996	8.00023	11.0007	6.99904	9.00143	11.0007	6.00096	9.99951	9.99951	9.99951	8.00023	285.014	11.0007	8.00023	234.985	4.99976	13	19.999	280.991	14.0012	14.0012	6.00096	242.003	9.00143	14.0012
ECL21680/1-4496	289.007	228.997	272.008	257.006	258.004	252.015	275.002	280.991	282.987	278.995	211.998	224.007	276.998	6.00096	6.00096	241.005	229.995	253.013	258.004	280.991	279.993	274.004	274.004	6.99904	277.996	8.00023	11.0007	6.99904	9.00143	11.0007	6.00096	9.99951	9.99951	9.99951	8.00023	280.991	11.0007	8.00023	234.985	6.99904	9.00143	16.0005	280.991	9.99951	9.99951	6.00096	242.003	9.00143	14.0012
ECL20436/1-4496	290.005	229.995	271.01	256.008	259.002	253.013	276	279.993	281.989	279.993	212.997	225.005	277.996	6.99904	6.99904	242.003	228.997	254.011	257.006	281.989	280.991	273.006	273.006	8.00023	278.995	9.00143	11.9988	6.00096	8.00023	9.99951	6.99904	11.0007	11.0007	6.99904	6.99904	281.989	9.99951	6.99904	236.015	8.00023	0	14.9993	281.989	11.0007	9.00143	6.99904	243.001	8.00023	13
ECL22128/1-4496	293.997	229.995	276.998	258.004	262.994	253.013	276	281.989	283.985	279.993	212.997	228.997	277.996	6.99904	6.99904	242.003	230.993	258.004	262.994	286.012	280.991	278.995	278.995	8.00023	278.995	9.00143	11.9988	8.00023	9.99951	11.9988	6.99904	11.0007	11.0007	11.0007	9.00143	286.012	11.9988	9.00143	236.015	11.9988	14.0012	21.0002	281.989	14.9993	14.9993	6.99904	243.001	9.99951	14.9993
ECL22868/1-4496	293.997	229.995	276.998	258.004	262.994	253.013	276	281.989	283.985	279.993	212.997	228.997	277.996	6.99904	6.99904	242.003	230.993	258.004	262.994	286.012	280.991	278.995	278.995	8.00023	278.995	9.00143	11.9988	8.00023	9.99951	11.9988	6.99904	11.0007	11.0007	11.0007	9.00143	286.012	11.9988	9.00143	236.015	11.9988	14.0012	21.0002	281.989	14.9993	14.9993	6.99904	243.001	9.99951	14.9993
ECL20769/1-4496	294.995	230.993	276	257.006	263.992	254.011	276.998	280.991	282.987	280.991	213.995	229.995	278.995	8.00023	8.00023	243.001	229.995	259.002	261.996	287.01	281.989	277.996	277.996	9.00143	279.993	9.99951	13	6.99904	9.00143	13	8.00023	11.9988	11.9988	9.99951	9.99951	287.01	11.0007	9.99951	237.013	13	13	19.999	282.987	16.0005	16.0005	8.00023	243.999	9.00143	0
ECL21274/1-4496	294.995	230.993	276	257.006	263.992	254.011	276.998	280.991	282.987	280.991	213.995	229.995	278.995	8.00023	8.00023	243.001	229.995	259.002	261.996	287.01	281.989	277.996	277.996	9.00143	279.993	9.99951	13	6.99904	6.99904	13	8.00023	11.9988	11.9988	9.99951	9.99951	287.01	11.0007	9.99951	237.013	13	13	17.9997	282.987	16.0005	16.0005	8.00023	243.999	9.00143	14.0012
ECL21628/1-4496	294.995	230.993	276	257.006	263.992	254.011	276.998	280.991	282.987	280.991	213.995	229.995	278.995	8.00023	8.00023	243.001	229.995	259.002	261.996	287.01	281.989	277.996	277.996	9.00143	279.993	9.99951	13	6.99904	9.00143	13	8.00023	11.9988	11.9988	9.99951	9.99951	287.01	11.0007	9.99951	237.013	13	13	19.999	282.987	16.0005	16.0005	8.00023	243.999	9.00143	14.0012
ECL20566/1-4496	291.003	230.993	274.004	259.002	260	254.011	276.998	282.987	285.014	280.991	213.995	226.003	278.995	8.00023	8.00023	243.001	231.991	255.009	260	282.987	281.989	276	276	9.00143	279.993	9.99951	13	9.00143	11.0007	13	8.00023	9.99951	9.99951	11.9988	9.99951	282.987	13	9.99951	237.013	9.00143	11.0007	17.9997	282.987	0	11.9988	8.00023	243.999	11.0007	16.0005
ECL20622/1-4496	291.003	230.993	274.004	259.002	260	254.011	276.998	282.987	285.014	280.991	213.995	226.003	278.995	8.00023	8.00023	243.001	231.991	255.009	260	282.987	281.989	276	276	9.00143	279.993	9.99951	13	9.00143	11.0007	11.0007	8.00023	11.9988	11.9988	9.99951	8.00023	282.987	13	8.00023	237.013	9.00143	9.00143	17.9997	282.987	11.9988	0	8.00023	243.999	11.0007	16.0005
ECL20776/1-4496	291.003	230.993	274.004	259.002	260	254.011	276.998	282.987	285.014	280.991	213.995	226.003	278.995	8.00023	8.00023	243.001	231.991	255.009	260	282.987	281.989	276	276	9.00143	279.993	9.99951	13	9.00143	11.0007	11.0007	8.00023	11.9988	11.9988	9.99951	8.00023	282.987	13	8.00023	237.013	9.00143	4.99976	17.9997	282.987	11.9988	9.99951	8.00023	243.999	11.0007	16.0005
ECL21259/1-4496	294.995	230.993	277.996	259.002	263.992	254.011	276.998	282.987	285.014	280.991	213.995	229.995	278.995	8.00023	8.00023	243.001	231.991	259.002	263.992	287.01	281.989	279.993	279.993	9.00143	279.993	9.99951	13	9.00143	9.00143	13	8.00023	11.9988	11.9988	11.9988	9.99951	287.01	13	9.99951	237.013	13	14.9993	19.999	282.987	16.0005	16.0005	8.00023	243.999	11.0007	16.0005
ECL21551/1-4496	294.995	230.993	277.996	259.002	263.992	254.011	276.998	282.987	285.014	280.991	213.995	229.995	278.995	8.00023	8.00023	243.001	231.991	259.002	263.992	287.01	281.989	279.993	279.993	9.00143	279.993	9.99951	13	9.00143	9.00143	13	8.00023	11.9988	11.9988	11.9988	9.99951	287.01	13	9.99951	237.013	13	14.9993	17.9997	282.987	16.0005	16.0005	8.00023	243.999	11.0007	16.0005
ECL22093/1-4496	292.999	230.993	277.996	259.002	263.992	254.011	276.998	282.987	285.014	280.991	213.995	229.995	278.995	8.00023	8.00023	243.001	231.991	259.002	263.992	287.01	281.989	279.993	279.993	9.00143	279.993	9.99951	13	9.00143	11.0007	13	8.00023	11.9988	11.9988	11.9988	9.99951	287.01	13	9.99951	237.013	13	14.9993	22.0014	282.987	16.0005	16.0005	8.00023	243.999	11.0007	16.0005
ECL22447/1-4496	291.003	230.993	274.004	259.002	260	254.011	276.998	282.987	285.014	280.991	213.995	226.003	278.995	8.00023	8.00023	243.001	231.991	255.009	260	282.987	281.989	276	276	9.00143	279.993	9.99951	13	9.00143	11.0007	13	8.00023	11.9988	11.9988	11.9988	9.99951	282.987	13	9.99951	237.013	9.00143	11.0007	16.0005	282.987	11.9988	11.9988	8.00023	243.999	11.0007	16.0005
ECL20836/1-4496	292.001	231.991	273.006	258.004	260.998	255.009	277.996	281.989	283.985	281.989	214.993	227.001	279.993	9.00143	9.00143	243.999	230.993	256.008	259.002	283.985	282.987	275.002	275.002	8.00023	280.991	11.0007	14.0012	8.00023	9.99951	14.0012	9.00143	13	13	11.0007	11.0007	283.985	11.9988	11.0007	238.011	8.00023	9.99951	16.9986	283.985	13	13	9.00143	244.997	9.99951	14.9993
ECL21541/1-4496	295.993	231.991	276.998	258.004	264.99	255.009	277.996	281.989	283.985	281.989	214.993	230.993	279.993	9.00143	9.00143	243.999	230.993	260	262.994	288.008	282.987	278.995	278.995	9.99951	280.991	11.0007	14.0012	8.00023	9.99951	14.0012	9.00143	13	13	11.0007	11.0007	288.008	11.9988	11.0007	238.011	14.0012	14.0012	21.0002	283.985	16.9986	16.9986	9.00143	244.997	9.99951	14.9993
ECL21730/1-4496	295.993	231.991	276.998	258.004	264.99	255.009	277.996	281.989	283.985	281.989	214.993	230.993	279.993	9.00143	9.00143	243.999	230.993	260	262.994	288.008	282.987	278.995	278.995	8.00023	280.991	11.0007	14.0012	8.00023	9.99951	14.0012	9.00143	13	13	11.0007	11.0007	288.008	11.9988	11.0007	238.011	11.9988	14.0012	21.0002	283.985	16.9986	16.9986	9.00143	244.997	9.99951	14.9993
ECL22099/1-4496	295.993	231.991	276.998	258.004	264.99	255.009	277.996	281.989	283.985	281.989	214.993	230.993	279.993	9.00143	9.00143	243.999	230.993	260	262.994	288.008	282.987	278.995	278.995	9.99951	280.991	11.0007	14.0012	8.00023	9.99951	9.99951	9.00143	13	13	4.99976	6.99904	288.008	11.9988	6.99904	238.011	14.0012	11.9988	21.0002	283.985	16.9986	14.9993	9.00143	244.997	9.99951	14.9993
ECL20778/1-4496	292.001	231.991	275.002	260	260.998	255.009	277.996	283.985	286.012	281.989	214.993	227.001	279.993	9.00143	9.00143	243.999	232.989	256.008	260.998	283.985	282.987	276.998	276.998	9.99951	280.991	11.0007	14.0012	9.99951	11.9988	9.99951	9.00143	13	13	6.99904	6.99904	283.985	14.0012	6.99904	238.011	9.99951	9.99951	19.0009	283.985	13	11.0007	9.00143	244.997	11.9988	16.9986
ECL21518/1-4496	292.001	231.991	275.002	260	260.998	255.009	277.996	283.985	286.012	281.989	214.993	227.001	279.993	9.00143	9.00143	243.999	232.989	256.008	260.998	283.985	282.987	276.998	276.998	9.99951	280.991	11.0007	14.0012	9.99951	9.99951	14.0012	9.00143	13	13	13	11.0007	283.985	14.0012	11.0007	238.011	9.99951	11.9988	14.9993	283.985	13	13	9.00143	244.997	11.9988	16.9986
SRR9913963/1-4496	285.014	221.012	267.984	248.99	254.011	243.999	266.986	273.006	275.002	271.01	204.014	220.014	269.014	9.99951	9.99951	232.989	222.01	248.99	254.011	276.998	272.008	270.012	270.012	11.0007	270.012	11.9988	14.9993	11.0007	13	14.9993	9.99951	14.0012	14.0012	14.0012	11.9988	276.998	14.9993	11.9988	227.001	14.9993	16.9986	24.0007	273.006	17.9997	17.9997	9.99951	233.987	13	17.9997
ECL20911/1-4496	296.991	232.989	277.996	259.002	265.988	256.008	278.995	282.987	285.014	282.987	215.991	231.991	280.991	9.99951	9.99951	244.997	231.991	260.998	263.992	289.007	283.985	279.993	279.993	11.0007	281.989	11.9988	14.9993	9.00143	9.00143	14.9993	9.99951	14.0012	14.0012	11.9988	11.9988	289.007	13	11.9988	239.009	14.9993	14.9993	19.999	285.014	17.9997	17.9997	9.99951	245.996	11.0007	16.0005
ECL22503/1-4496	296.991	232.989	279.993	260.998	265.988	256.008	278.995	285.014	287.01	282.987	215.991	231.991	280.991	9.99951	9.99951	244.997	233.987	260.998	265.988	289.007	283.985	281.989	281.989	11.0007	281.989	11.9988	14.9993	11.0007	11.0007	14.9993	9.99951	14.0012	14.0012	14.0012	11.9988	289.007	14.9993	11.9988	239.009	14.9993	16.9986	19.999	285.014	17.9997	17.9997	9.99951	245.996	13	17.9997
ECL22536/1-4496	296.991	232.989	279.993	260.998	265.988	256.008	278.995	285.014	287.01	282.987	215.991	231.991	280.991	9.99951	9.99951	243.001	233.987	260.998	265.988	289.007	283.985	281.989	281.989	11.0007	281.989	11.9988	14.9993	11.0007	13	14.9993	9.99951	14.0012	14.0012	14.0012	11.9988	289.007	14.9993	11.9988	239.009	14.9993	16.9986	24.0007	285.014	17.9997	17.9997	9.99951	245.996	13	17.9997
ECL22867/1-4496	296.991	232.989	279.993	260.998	265.988	256.008	278.995	285.014	287.01	282.987	215.991	231.991	280.991	9.99951	9.99951	244.997	233.987	260.998	265.988	289.007	283.985	281.989	281.989	11.0007	281.989	11.9988	14.9993	11.0007	13	14.9993	9.99951	14.0012	14.0012	14.0012	11.9988	289.007	14.9993	11.9988	239.009	14.9993	16.9986	24.0007	285.014	17.9997	17.9997	9.99951	245.996	13	17.9997
ECL21412/1-4496	297.989	233.987	278.995	260	266.986	257.006	279.993	283.985	286.012	283.985	216.989	232.989	281.989	11.0007	11.0007	245.996	232.989	261.996	264.99	290.005	285.014	280.991	280.991	11.9988	282.987	13	16.0005	9.99951	11.9988	16.0005	11.0007	14.9993	14.9993	13	13	290.005	14.0012	13	240.007	16.0005	16.0005	22.9995	286.012	19.0009	19.0009	11.0007	246.994	11.9988	16.9986
ECL21837/1-4496	297.989	233.987	278.995	260	266.986	257.006	279.993	283.985	286.012	283.985	216.989	232.989	281.989	11.0007	11.0007	245.996	232.989	261.996	264.99	290.005	285.014	280.991	280.991	9.99951	282.987	13	16.0005	9.99951	11.9988	16.0005	11.0007	14.9993	14.9993	13	13	290.005	14.0012	13	240.007	11.9988	16.0005	22.9995	286.012	19.0009	19.0009	11.0007	246.994	11.9988	16.9986
ECL22505/1-4496	297.989	233.987	278.995	260	266.986	257.006	279.993	283.985	286.012	283.985	216.989	232.989	281.989	11.0007	11.0007	245.996	232.989	261.996	264.99	290.005	285.014	280.991	280.991	11.9988	282.987	13	16.0005	9.99951	11.9988	16.0005	11.0007	14.9993	14.9993	13	13	290.005	14.0012	13	240.007	16.0005	16.0005	22.9995	286.012	19.0009	19.0009	11.0007	246.994	11.9988	16.9986
ECL22967/1-4496	297.989	233.987	278.995	260	266.986	257.006	279.993	283.985	286.012	283.985	216.989	232.989	281.989	11.0007	11.0007	245.996	232.989	261.996	264.99	290.005	285.014	280.991	280.991	11.9988	282.987	13	16.0005	9.99951	11.9988	16.0005	11.0007	14.9993	14.9993	13	13	290.005	14.0012	13	240.007	16.0005	16.0005	22.9995	286.012	19.0009	19.0009	11.0007	246.994	11.9988	16.9986
SRR11046875/1-4496	297.989	233.987	278.995	260	266.986	257.006	279.993	283.985	286.012	283.985	216.989	232.989	281.989	11.0007	11.0007	245.996	232.989	261.996	264.99	290.005	285.014	280.991	280.991	11.9988	282.987	13	16.0005	9.99951	11.9988	16.0005	11.0007	14.9993	14.9993	13	13	290.005	14.0012	13	240.007	16.0005	16.0005	22.9995	286.012	19.0009	19.0009	11.0007	246.994	11.9988	16.9986
ECL22553/1-4496	293.997	233.987	276.998	261.996	262.994	257.006	279.993	286.012	288.008	283.985	216.989	228.997	281.989	11.0007	11.0007	245.996	234.985	258.004	262.994	286.012	285.014	278.995	278.995	11.9988	282.987	13	16.0005	11.9988	14.0012	11.9988	11.0007	14.9993	14.9993	9.00143	9.00143	286.012	16.0005	9.00143	240.007	11.9988	11.9988	21.0002	286.012	14.9993	13	11.0007	246.994	14.0012	19.0009
SRR11074710/1-4496	282.987	218.985	263.992	244.997	252.015	242.003	264.99	269.014	271.01	269.014	204.014	217.987	266.986	11.9988	11.9988	230.993	217.987	246.994	249.988	275.002	270.012	265.988	265.988	13	267.984	14.0012	16.9986	11.0007	13	16.9986	11.9988	16.0005	16.0005	14.0012	14.0012	275.002	14.9993	14.0012	225.005	16.9986	16.9986	24.0007	271.01	19.999	19.999	11.9988	231.991	13	17.9997
SRR7213597/1-4496	285.014	221.012	267.984	248.99	254.011	243.999	266.986	273.006	275.002	271.01	204.014	220.014	269.014	11.9988	11.9988	232.989	222.01	248.99	254.011	276.998	272.008	270.012	270.012	13	270.012	14.0012	16.9986	13	14.9993	16.9986	11.9988	16.0005	16.0005	16.0005	14.0012	276.998	16.9986	14.0012	227.001	16.9986	19.0009	26	273.006	19.999	19.999	11.9988	233.987	14.9993	19.999
ECL21505/1-4496	298.987	234.985	281.989	262.994	267.984	258.004	280.991	287.01	289.007	285.014	217.987	233.987	282.987	11.9988	11.9988	246.994	236.015	262.994	267.984	291.003	286.012	283.985	283.985	13	283.985	14.0012	16.9986	13	14.9993	14.9993	11.9988	16.0005	16.0005	14.0012	11.9988	291.003	16.9986	11.9988	239.009	16.9986	16.9986	26	287.01	19.999	8.00023	11.9988	247.992	14.9993	19.999
ECL21652/1-4496	294.995	234.985	277.996	262.994	263.992	258.004	280.991	287.01	289.007	285.014	217.987	229.995	282.987	11.9988	11.9988	246.994	236.015	259.002	263.992	287.01	286.012	279.993	279.993	11.0007	283.985	14.0012	16.9986	13	14.9993	16.9986	11.9988	16.0005	16.0005	16.0005	14.0012	287.01	16.9986	14.0012	241.005	6.99904	14.9993	22.0014	287.01	16.0005	16.0005	11.9988	247.992	14.9993	19.999
ECL21655/1-4496	294.995	234.985	277.996	262.994	263.992	258.004	280.991	287.01	289.007	285.014	217.987	229.995	282.987	11.9988	11.9988	246.994	236.015	259.002	263.992	287.01	286.012	279.993	279.993	13	283.985	14.0012	16.9986	13	14.9993	13	11.9988	16.0005	16.0005	9.99951	9.99951	287.01	16.9986	9.99951	241.005	13	13	22.0014	287.01	16.0005	14.0012	11.9988	247.992	14.9993	19.999
ECL23067/1-4496	298.987	234.985	281.989	262.994	267.984	258.004	280.991	287.01	289.007	285.014	217.987	233.987	282.987	11.9988	11.9988	246.994	236.015	262.994	267.984	291.003	286.012	283.985	283.985	11.0007	283.985	14.0012	16.9986	13	14.9993	16.9986	11.9988	16.0005	16.0005	16.0005	14.0012	291.003	16.9986	14.0012	241.005	14.9993	19.0009	26	287.01	19.999	19.999	11.9988	247.992	14.9993	19.999
SRR7213576/1-4496	283.985	220.014	266.986	247.992	253.013	243.001	265.988	272.008	274.004	270.012	205.012	218.985	267.984	13	13	231.991	221.012	247.992	253.013	276	271.01	269.014	269.014	14.0012	269.014	14.9993	17.9997	14.0012	16.0005	17.9997	13	16.9986	16.9986	16.9986	14.9993	276	17.9997	14.9993	226.003	17.9997	19.999	27.0012	272.008	21.0002	21.0002	13	232.989	16.0005	21.0002
SRR11046294/1-4496	283.985	220.014	266.986	247.992	253.013	243.001	265.988	272.008	274.004	270.012	205.012	218.985	267.984	13	13	231.991	221.012	247.992	253.013	276	271.01	269.014	269.014	14.0012	269.014	14.9993	17.9997	14.0012	16.0005	17.9997	13	16.9986	16.9986	16.9986	14.9993	276	17.9997	14.9993	226.003	17.9997	19.999	27.0012	272.008	21.0002	21.0002	13	232.989	16.0005	21.0002
SRR7213583/1-4496	286.012	222.01	269.014	249.988	255.009	244.997	267.984	274.004	276	272.008	205.012	221.012	270.012	13	13	233.987	223.008	249.988	255.009	277.996	273.006	271.01	271.01	14.0012	271.01	14.9993	17.9997	14.0012	16.0005	17.9997	13	16.9986	16.9986	16.9986	14.9993	277.996	17.9997	14.9993	227.999	17.9997	19.999	27.0012	274.004	21.0002	21.0002	13	234.985	16.0005	21.0002
SRR8901392/1-4496	286.012	222.01	269.014	249.988	255.009	244.997	267.984	274.004	276	272.008	205.012	221.012	270.012	13	13	233.987	223.008	249.988	255.009	277.996	273.006	271.01	271.01	14.0012	271.01	14.9993	17.9997	14.0012	16.0005	17.9997	13	16.9986	16.9986	16.9986	14.9993	277.996	17.9997	14.9993	227.999	17.9997	19.999	27.0012	274.004	21.0002	21.0002	13	234.985	16.0005	21.0002
SRR7213573/1-4496	288.008	224.007	271.01	252.015	257.006	246.994	270.012	276	277.996	274.004	207.008	223.008	272.008	13	13	236.015	225.005	252.015	257.006	279.993	275.002	273.006	273.006	14.0012	273.006	14.9993	17.9997	14.0012	16.0005	17.9997	13	16.9986	16.9986	16.9986	14.9993	279.993	17.9997	14.9993	229.995	17.9997	19.999	27.0012	276	21.0002	21.0002	13	237.013	16.0005	21.0002
SRR8901402/1-4496	288.008	224.007	271.01	252.015	257.006	246.994	270.012	276	277.996	274.004	207.008	223.008	272.008	13	13	236.015	225.005	252.015	257.006	279.993	275.002	273.006	273.006	14.0012	273.006	14.9993	17.9997	14.0012	16.0005	17.9997	13	16.9986	16.9986	16.9986	14.9993	279.993	17.9997	14.9993	229.995	17.9997	19.999	27.0012	276	21.0002	21.0002	13	237.013	16.0005	21.0002
SRR9914120/1-4496	285.014	221.012	267.984	248.99	254.011	243.999	266.986	273.006	275.002	271.01	206.01	220.014	269.014	14.0012	14.0012	232.989	222.01	248.99	254.011	276.998	272.008	270.012	270.012	14.9993	270.012	16.0005	19.0009	14.9993	16.9986	19.0009	14.0012	17.9997	17.9997	17.9997	16.0005	276.998	19.0009	16.0005	227.001	19.0009	21.0002	27.9993	273.006	22.0014	22.0014	14.0012	233.987	16.9986	22.0014
SRR11045324/1-4496	285.014	221.012	267.984	248.99	254.011	243.999	266.986	273.006	275.002	271.01	206.01	220.014	269.014	14.0012	14.0012	232.989	222.01	248.99	254.011	276.998	272.008	270.012	270.012	14.9993	270.012	16.0005	19.0009	14.9993	16.9986	19.0009	14.0012	17.9997	17.9997	17.9997	16.0005	276.998	19.0009	16.0005	227.001	19.0009	21.0002	27.9993	273.006	22.0014	22.0014	14.0012	233.987	16.9986	22.0014
ECL20544/1-4496	296.991	237.013	277.996	262.994	265.988	260	282.987	287.01	289.007	287.01	220.014	231.991	285.014	14.0012	14.0012	248.99	236.015	260.998	263.992	289.007	288.008	279.993	279.993	14.9993	286.012	16.0005	19.0009	13	13	19.0009	14.0012	17.9997	17.9997	16.0005	16.0005	289.007	16.9986	16.0005	243.001	14.9993	14.9993	0	289.007	17.9997	17.9997	14.0012	249.988	14.9993	19.999
ECL21542/1-4496	296.991	237.013	277.996	262.994	265.988	260	282.987	287.01	289.007	287.01	220.014	231.991	285.014	14.0012	14.0012	248.99	236.015	260.998	263.992	289.007	288.008	279.993	279.993	13	286.012	16.0005	19.0009	13	14.9993	19.0009	14.0012	17.9997	17.9997	16.0005	16.0005	289.007	16.9986	16.0005	243.001	9.00143	14.9993	22.0014	289.007	17.9997	17.9997	14.0012	249.988	14.9993	19.999
ECL22491/1-4496	301.015	237.013	283.985	264.99	270.012	260	282.987	289.007	291.003	287.01	220.014	236.015	285.014	14.0012	14.0012	248.99	238.011	264.99	270.012	292.999	288.008	286.012	286.012	14.9993	286.012	16.0005	19.0009	14.9993	16.9986	19.0009	14.0012	17.9997	17.9997	17.9997	16.0005	292.999	19.0009	16.0005	243.001	19.0009	21.0002	27.9993	289.007	22.0014	22.0014	14.0012	249.988	16.9986	22.0014
SRR11046874/1-4496	286.012	222.01	269.014	249.988	255.009	244.997	267.984	274.004	276	272.008	207.008	221.012	270.012	14.9993	14.9993	233.987	223.008	249.988	255.009	277.996	273.006	271.01	271.01	16.0005	271.01	16.9986	19.999	16.0005	17.9997	19.999	14.9993	19.0009	19.0009	19.0009	16.9986	277.996	19.999	16.9986	227.999	19.999	22.0014	29.0005	274.004	22.9995	22.9995	14.9993	234.985	17.9997	22.9995
SRR11046877/1-4496	288.008	224.007	269.014	249.988	257.006	246.994	270.012	274.004	276	274.004	207.008	223.008	272.008	14.9993	14.9993	236.015	223.008	252.015	255.009	279.993	275.002	271.01	271.01	16.0005	273.006	16.9986	19.999	14.0012	16.0005	19.999	14.9993	19.0009	19.0009	16.9986	16.9986	279.993	17.9997	16.9986	229.995	19.999	19.999	27.0012	276	22.9995	22.9995	14.9993	237.013	16.0005	21.0002
SRR11046301/1-4496	290.005	226.003	271.01	252.015	259.002	248.99	272.008	276	277.996	276	209.004	225.005	274.004	14.9993	14.9993	238.011	225.005	254.011	257.006	281.989	276.998	273.006	273.006	16.0005	275.002	16.9986	19.999	14.0012	16.0005	19.999	14.9993	19.0009	19.0009	16.9986	16.9986	281.989	17.9997	16.9986	231.991	19.999	19.999	27.0012	277.996	22.9995	22.9995	14.9993	239.009	16.0005	21.0002
SRR7213659/1-4496	290.005	226.003	273.006	254.011	259.002	248.99	272.008	277.996	279.993	276	209.004	225.005	274.004	14.9993	14.9993	238.011	227.001	254.011	259.002	281.989	276.998	275.002	275.002	16.0005	275.002	16.9986	19.999	16.0005	17.9997	19.999	14.9993	19.0009	19.0009	19.0009	16.9986	281.989	19.999	16.9986	231.991	19.999	22.0014	29.0005	277.996	22.9995	22.9995	14.9993	239.009	17.9997	22.9995
ECL22052/1-4496	297.989	238.011	278.995	263.992	266.986	260.998	283.985	288.008	290.005	288.008	221.012	232.989	286.012	14.9993	14.9993	249.988	237.013	261.996	264.99	290.005	289.007	280.991	280.991	16.0005	287.01	16.9986	19.999	14.0012	16.0005	19.999	14.9993	19.0009	19.0009	16.9986	16.9986	290.005	17.9997	16.9986	243.999	16.0005	16.0005	22.9995	290.005	19.0009	19.0009	14.9993	250.986	16.0005	21.0002
SRR11074153/1-4496	287.01	223.008	270.012	250.986	256.008	245.996	269.014	275.002	276.998	273.006	208.006	222.01	271.01	16.0005	16.0005	234.985	224.007	250.986	256.008	278.995	274.004	272.008	272.008	16.9986	272.008	17.9997	21.0002	16.9986	19.0009	21.0002	16.0005	19.999	19.999	19.999	17.9997	278.995	21.0002	17.9997	228.997	21.0002	22.9995	29.9985	275.002	24.0007	24.0007	16.0005	236.015	19.0009	24.0007
ECL20850/1-4496	298.987	239.009	279.993	264.99	267.984	261.996	285.014	289.007	291.003	289.007	222.01	233.987	287.01	16.0005	16.0005	250.986	238.011	262.994	265.988	291.003	290.005	281.989	281.989	16.9986	288.008	17.9997	21.0002	14.9993	16.9986	16.9986	16.0005	19.999	19.999	11.9988	14.0012	291.003	19.0009	14.0012	244.997	16.9986	14.9993	24.0007	291.003	19.999	17.9997	16.0005	252.015	16.9986	22.0014
SRR11046878/1-4496	288.008	224.007	271.01	252.015	257.006	246.994	270.012	276	277.996	274.004	209.004	223.008	272.008	16.9986	16.9986	236.015	225.005	252.015	257.006	279.993	275.002	273.006	273.006	17.9997	273.006	19.0009	22.0014	17.9997	19.999	22.0014	16.9986	21.0002	21.0002	21.0002	19.0009	279.993	22.0014	19.0009	229.995	22.0014	24.0007	30.9997	276	24.9988	24.9988	16.9986	237.013	19.999	24.9988
SRR11048596/1-4496	288.008	224.007	271.01	252.015	257.006	246.994	270.012	276	277.996	274.004	209.004	223.008	272.008	16.9986	16.9986	236.015	225.005	252.015	257.006	279.993	275.002	273.006	273.006	17.9997	273.006	19.0009	22.0014	17.9997	19.999	22.0014	16.9986	21.0002	21.0002	21.0002	19.0009	279.993	22.0014	19.0009	229.995	22.0014	24.0007	30.9997	276	24.9988	24.9988	16.9986	237.013	19.999	24.9988
SRR11074688/1-4496	288.008	224.007	271.01	252.015	257.006	246.994	270.012	276	277.996	274.004	209.004	223.008	272.008	16.9986	16.9986	236.015	225.005	252.015	257.006	279.993	275.002	273.006	273.006	17.9997	273.006	19.0009	22.0014	17.9997	19.999	22.0014	16.9986	21.0002	21.0002	21.0002	19.0009	279.993	22.0014	19.0009	229.995	22.0014	24.0007	30.9997	276	24.9988	24.9988	16.9986	237.013	19.999	24.9988
SRR11045323/1-4496	290.005	226.003	273.006	254.011	259.002	248.99	272.008	277.996	279.993	276	209.004	225.005	274.004	16.9986	16.9986	238.011	227.001	254.011	259.002	281.989	276.998	275.002	275.002	17.9997	275.002	19.0009	22.0014	17.9997	19.999	22.0014	16.9986	21.0002	21.0002	21.0002	19.0009	281.989	22.0014	19.0009	231.991	22.0014	24.0007	30.9997	277.996	24.9988	24.9988	16.9986	239.009	19.999	24.9988
SRR11074174/1-4496	292.001	227.999	275.002	256.008	260.998	250.986	274.004	279.993	281.989	277.996	211	227.001	276	16.9986	16.9986	240.007	228.997	256.008	260.998	283.985	278.995	276.998	276.998	17.9997	276.998	19.0009	22.0014	17.9997	19.999	22.0014	16.9986	21.0002	21.0002	21.0002	19.0009	283.985	22.0014	19.0009	233.987	22.0014	24.0007	30.9997	279.993	24.9988	24.9988	16.9986	241.005	19.999	24.9988
ECL22215/1-4496	304.009	240.007	285.014	265.988	273.006	262.994	286.012	290.005	292.001	290.005	223.008	239.009	288.008	16.9986	16.9986	252.015	239.009	267.984	271.01	295.993	291.003	287.01	287.01	17.9997	289.007	19.0009	22.0014	16.0005	17.9997	22.0014	16.9986	21.0002	21.0002	19.0009	19.0009	295.993	19.999	19.0009	245.996	22.0014	22.0014	29.0005	292.001	24.9988	24.9988	16.9986	253.013	17.9997	14.9993
ECL22298/1-4496	299.985	240.007	280.991	265.988	269.014	262.994	286.012	290.005	292.001	290.005	223.008	234.985	288.008	16.9986	16.9986	252.015	239.009	263.992	266.986	292.001	291.003	282.987	282.987	17.9997	289.007	19.0009	22.0014	16.0005	16.0005	22.0014	16.9986	21.0002	21.0002	19.0009	19.0009	292.001	19.999	19.0009	245.996	17.9997	17.9997	21.0002	292.001	21.0002	21.0002	16.9986	253.013	17.9997	22.9995
SRR7213598/1-4496	304.009	240.007	287.01	267.984	273.006	262.994	286.012	292.001	293.997	290.005	223.008	239.009	288.008	16.9986	16.9986	252.015	241.005	267.984	273.006	295.993	291.003	289.007	289.007	17.9997	289.007	19.0009	22.0014	17.9997	19.999	22.0014	16.9986	21.0002	21.0002	21.0002	19.0009	295.993	22.0014	19.0009	245.996	22.0014	24.0007	30.9997	292.001	24.9988	24.9988	16.9986	253.013	19.999	24.9988
SRR11074676/1-4496	289.007	225.005	272.008	253.013	258.004	247.992	271.01	276.998	278.995	275.002	210.002	224.007	273.006	17.9997	17.9997	237.013	226.003	253.013	258.004	280.991	276	274.004	274.004	19.0009	274.004	19.999	22.9995	19.0009	21.0002	22.9995	17.9997	22.0014	22.0014	22.0014	19.999	280.991	22.9995	19.999	230.993	22.9995	24.9988	32.0009	276.998	26	26	17.9997	238.011	21.0002	26
SRR11074681/1-4496	289.007	225.005	272.008	253.013	258.004	247.992	271.01	276.998	278.995	275.002	210.002	224.007	273.006	17.9997	17.9997	237.013	226.003	253.013	258.004	280.991	276	274.004	274.004	19.0009	274.004	19.999	22.9995	19.0009	21.0002	22.9995	17.9997	22.0014	22.0014	22.0014	19.999	280.991	22.9995	19.999	230.993	22.9995	24.9988	32.0009	276.998	26	26	17.9997	238.011	21.0002	26
SRR7213660/1-4496	291.003	227.001	274.004	255.009	260	249.988	273.006	278.995	280.991	276.998	210.002	226.003	275.002	17.9997	17.9997	239.009	227.999	255.009	260	282.987	277.996	276	276	19.0009	276	19.999	22.9995	19.0009	21.0002	22.9995	17.9997	22.0014	22.0014	22.0014	19.999	282.987	22.9995	19.999	232.989	22.9995	24.9988	32.0009	278.995	26	26	17.9997	240.007	21.0002	26
SRR11046297/1-4496	290.005	226.003	273.006	254.011	259.002	248.99	272.008	277.996	279.993	276	211	225.005	274.004	19.0009	19.0009	238.011	227.001	254.011	259.002	281.989	276.998	275.002	275.002	19.999	275.002	21.0002	24.0007	19.999	22.0014	24.0007	19.0009	22.9995	22.9995	22.9995	21.0002	281.989	24.0007	21.0002	231.991	24.0007	26	32.999	277.996	27.0012	27.0012	19.0009	239.009	22.0014	27.0012
SRR11046300/1-4496	291.003	227.001	274.004	255.009	260	249.988	273.006	278.995	280.991	276.998	211.998	226.003	275.002	19.999	19.999	239.009	227.999	255.009	260	282.987	277.996	276	276	21.0002	276	22.0014	24.9988	21.0002	22.9995	24.9988	19.999	24.0007	24.0007	24.0007	22.0014	282.987	24.9988	22.0014	232.989	24.9988	27.0012	33.9971	278.995	27.9993	27.9993	19.999	240.007	22.9995	27.9993
SRR11074697/1-4496	291.003	227.001	274.004	255.009	260	249.988	273.006	278.995	280.991	276.998	211.998	226.003	275.002	19.999	19.999	239.009	227.999	255.009	260	282.987	277.996	276	276	21.0002	276	22.0014	24.9988	21.0002	22.9995	24.9988	19.999	24.0007	24.0007	24.0007	22.0014	282.987	24.9988	22.0014	232.989	24.9988	27.0012	33.9971	278.995	27.9993	27.9993	19.999	240.007	22.9995	27.9993
SRR7213602/1-4496	291.003	227.001	274.004	255.009	260	249.988	273.006	278.995	280.991	276.998	211.998	226.003	275.002	19.999	19.999	239.009	227.999	255.009	260	282.987	277.996	276	276	21.0002	276	22.0014	24.9988	21.0002	22.9995	24.9988	19.999	24.0007	24.0007	24.0007	22.0014	282.987	24.9988	22.0014	232.989	24.9988	27.0012	33.9971	278.995	27.9993	27.9993	19.999	240.007	22.9995	27.9993
SRR11074704/1-4496	291.003	227.001	274.004	255.009	260	249.988	273.006	278.995	280.991	276.998	211.998	226.003	275.002	19.999	19.999	239.009	227.999	255.009	260	282.987	277.996	276	276	21.0002	276	22.0014	24.9988	21.0002	22.9995	24.9988	19.999	24.0007	24.0007	24.0007	22.0014	282.987	24.9988	22.0014	232.989	24.9988	27.0012	33.9971	278.995	27.9993	27.9993	19.999	240.007	22.9995	27.9993
SRR7213570/1-4496	291.003	227.001	274.004	255.009	260	249.988	273.006	278.995	280.991	276.998	211.998	226.003	275.002	19.999	19.999	239.009	227.999	255.009	260	282.987	277.996	276	276	21.0002	276	22.0014	24.9988	21.0002	22.9995	24.9988	19.999	24.0007	24.0007	24.0007	22.0014	282.987	24.9988	22.0014	232.989	24.9988	27.0012	33.9971	278.995	27.9993	27.9993	19.999	240.007	22.9995	27.9993
ECL23013/1-4496	307.003	243.001	290.005	271.01	276	265.988	289.007	294.995	296.991	292.999	226.003	242.003	291.003	19.999	19.999	255.009	243.999	271.01	276	298.987	293.997	292.001	292.001	21.0002	292.001	22.0014	24.9988	21.0002	22.9995	24.9988	19.999	24.0007	24.0007	24.0007	22.0014	298.987	19.0009	22.0014	248.99	24.9988	27.0012	33.9971	294.995	27.9993	27.9993	19.999	256.008	22.9995	27.9993
SRR7213606/1-4496	292.001	227.999	275.002	256.008	260.998	250.986	274.004	279.993	281.989	277.996	212.997	227.001	276	21.0002	21.0002	240.007	228.997	256.008	260.998	283.985	278.995	276.998	276.998	22.0014	276.998	22.9995	26	22.0014	24.0007	26	21.0002	24.9988	24.9988	24.9988	22.9995	283.985	26	22.9995	233.987	26	27.9993	34.9952	279.993	29.0005	29.0005	21.0002	240.007	24.0007	29.0005
SRR11074677/1-4496	292.001	227.999	275.002	256.008	260.998	250.986	274.004	279.993	281.989	277.996	212.997	227.001	276	21.0002	21.0002	240.007	228.997	256.008	260.998	283.985	278.995	276.998	276.998	22.0014	276.998	22.9995	26	22.0014	24.0007	26	21.0002	24.9988	24.9988	24.9988	22.9995	283.985	26	22.9995	233.987	26	27.9993	34.9952	279.993	29.0005	29.0005	21.0002	241.005	24.0007	29.0005
SRR7213595/1-4496	292.001	227.999	275.002	256.008	260.998	250.986	274.004	279.993	281.989	277.996	212.997	227.001	276	21.0002	21.0002	240.007	228.997	256.008	260.998	283.985	278.995	276.998	276.998	22.0014	276.998	22.9995	26	22.0014	24.0007	26	21.0002	24.9988	24.9988	24.9988	22.9995	283.985	26	22.9995	233.987	26	27.9993	34.9952	279.993	29.0005	29.0005	21.0002	241.005	24.0007	29.0005
SRR8901430/1-4496	292.001	227.999	275.002	256.008	260.998	250.986	274.004	279.993	281.989	277.996	212.997	227.001	276	21.0002	21.0002	240.007	228.997	256.008	260.998	283.985	278.995	276.998	276.998	22.0014	276.998	22.9995	26	22.0014	24.0007	26	21.0002	24.9988	24.9988	24.9988	22.9995	283.985	26	22.9995	233.987	26	27.9993	34.9952	279.993	29.0005	29.0005	21.0002	241.005	24.0007	29.0005
ECL22887/1-4496	304.009	243.999	287.01	272.008	273.006	266.986	290.005	295.993	297.989	293.997	227.001	239.009	292.001	21.0002	21.0002	256.008	244.997	267.984	273.006	295.993	294.995	289.007	289.007	22.0014	292.999	22.9995	26	22.0014	24.0007	26	21.0002	24.9988	24.9988	24.9988	22.9995	295.993	26	22.9995	249.988	22.0014	24.0007	30.9997	295.993	24.9988	24.9988	21.0002	257.006	24.0007	14.9993
ECL21290/1-4496	292.999	228.997	274.004	255.009	261.996	252.015	275.002	278.995	280.991	278.995	213.995	227.999	276.998	22.0014	22.0014	241.005	227.999	257.006	260	285.014	279.993	276	276	22.9995	277.996	24.0007	27.0012	21.0002	22.9995	27.0012	22.0014	26	26	24.0007	24.0007	285.014	24.9988	24.0007	234.985	27.0012	27.0012	33.9971	280.991	29.9985	29.9985	22.0014	242.003	22.9995	27.9993
SRR11074686/1-4496	292.999	228.997	276	257.006	261.996	252.015	275.002	280.991	282.987	278.995	213.995	227.999	276.998	22.0014	22.0014	241.005	229.995	257.006	261.996	285.014	279.993	277.996	277.996	22.9995	277.996	24.0007	27.0012	22.9995	24.9988	27.0012	22.0014	26	26	26	24.0007	285.014	27.0012	24.0007	234.985	27.0012	29.0005	35.9933	280.991	29.9985	29.9985	22.0014	242.003	24.9988	29.9985
SRR11074680/1-4496	293.997	229.995	275.002	256.008	262.994	253.013	276	279.993	281.989	279.993	214.993	228.997	277.996	22.9995	22.9995	242.003	228.997	258.004	260.998	286.012	280.991	276.998	276.998	24.0007	278.995	24.9988	27.9993	22.0014	24.0007	27.9993	22.9995	27.0012	27.0012	24.9988	24.9988	286.012	24.0007	24.9988	236.015	27.9993	27.9993	34.9952	281.989	30.9997	30.9997	22.9995	243.001	24.0007	29.0005
SRR7213569/1-4496	293.997	229.995	276.998	258.004	262.994	253.013	276	281.989	283.985	279.993	214.993	228.997	277.996	22.9995	22.9995	242.003	230.993	258.004	262.994	286.012	280.991	278.995	278.995	24.0007	278.995	24.9988	27.9993	24.0007	26	27.9993	22.9995	27.0012	27.0012	27.0012	24.9988	286.012	27.9993	24.9988	236.015	27.9993	29.9985	36.9913	281.989	30.9997	30.9997	22.9995	243.001	26	30.9997
SRR7213603/1-4496	294.995	230.993	277.996	259.002	263.992	254.011	276.998	282.987	285.014	280.991	215.991	229.995	278.995	24.0007	24.0007	243.001	231.991	259.002	263.992	287.01	281.989	279.993	279.993	24.9988	279.993	26	29.0005	24.9988	27.0012	29.0005	24.0007	27.9993	27.9993	27.9993	26	287.01	29.0005	26	237.013	29.0005	30.9997	37.9894	282.987	32.0009	32.0009	24.0007	243.999	27.0012	32.0009
SRR11074150/1-4496	294.995	230.993	277.996	259.002	263.992	254.011	276.998	282.987	285.014	280.991	215.991	229.995	278.995	24.0007	24.0007	243.001	231.991	259.002	263.992	287.01	281.989	279.993	279.993	24.9988	279.993	26	29.0005	24.9988	27.0012	29.0005	24.0007	27.9993	27.9993	27.9993	26	287.01	29.0005	26	237.013	29.0005	30.9997	37.9894	282.987	32.0009	32.0009	24.0007	243.999	27.0012	32.0009
SRR11074708/1-4496	294.995	230.993	277.996	259.002	263.992	254.011	276.998	282.987	285.014	280.991	215.991	229.995	278.995	24.0007	24.0007	243.001	231.991	259.002	263.992	287.01	281.989	279.993	279.993	24.9988	279.993	26	29.0005	24.9988	27.0012	29.0005	24.0007	27.9993	27.9993	27.9993	26	287.01	27.9993	26	237.013	29.0005	30.9997	37.9894	282.987	32.0009	32.0009	24.0007	243.999	27.0012	32.0009
SRR7213575/1-4496	294.995	230.993	277.996	259.002	263.992	254.011	276.998	282.987	285.014	280.991	215.991	229.995	278.995	24.0007	24.0007	243.001	231.991	259.002	263.992	287.01	281.989	279.993	279.993	24.9988	279.993	26	29.0005	24.9988	27.0012	29.0005	24.0007	27.9993	27.9993	27.9993	26	287.01	29.0005	26	237.013	29.0005	30.9997	37.9894	282.987	32.0009	32.0009	24.0007	243.999	27.0012	32.0009
SRR7213579/1-4496	294.995	230.993	277.996	259.002	263.992	254.011	276.998	282.987	285.014	280.991	215.991	229.995	278.995	24.0007	24.0007	243.001	231.991	259.002	263.992	287.01	281.989	279.993	279.993	24.9988	279.993	26	29.0005	24.9988	27.0012	29.0005	24.0007	27.9993	27.9993	27.9993	26	287.01	29.0005	26	237.013	29.0005	30.9997	37.9894	282.987	32.0009	32.0009	24.0007	243.999	27.0012	32.0009
SRR7213600/1-4496	294.995	230.993	277.996	259.002	263.992	254.011	276.998	282.987	285.014	280.991	215.991	229.995	278.995	24.0007	24.0007	243.001	231.991	259.002	263.992	287.01	281.989	279.993	279.993	24.9988	279.993	26	29.0005	24.9988	27.0012	29.0005	24.0007	27.9993	27.9993	27.9993	26	287.01	29.0005	26	237.013	29.0005	30.9997	37.9894	282.987	32.0009	32.0009	24.0007	243.999	27.0012	32.0009
SRR8901397/1-4496	294.995	230.993	277.996	259.002	263.992	254.011	276.998	282.987	285.014	280.991	215.991	229.995	278.995	24.0007	24.0007	243.001	231.991	259.002	263.992	287.01	281.989	279.993	279.993	24.9988	279.993	26	29.0005	24.9988	27.0012	29.0005	24.0007	27.9993	27.9993	27.9993	26	287.01	29.0005	26	237.013	29.0005	30.9997	37.9894	282.987	32.0009	32.0009	24.0007	243.999	27.0012	32.0009
SRR11045320/1-4496	298.987	234.985	281.989	262.994	267.984	258.004	280.991	287.01	289.007	285.014	217.987	233.987	282.987	24.0007	24.0007	246.994	236.015	262.994	267.984	291.003	286.012	283.985	283.985	24.9988	283.985	26	29.0005	24.9988	27.0012	29.0005	24.0007	27.9993	27.9993	27.9993	26	291.003	29.0005	26	241.005	29.0005	30.9997	37.9894	287.01	32.0009	32.0009	24.0007	247.992	27.0012	32.0009
SRR7213608/1-4496	297.989	233.987	280.991	261.996	266.986	257.006	279.993	286.012	288.008	283.985	216.989	232.989	281.989	24.9988	24.9988	245.996	234.985	261.996	266.986	290.005	285.014	282.987	282.987	26	282.987	27.0012	29.9985	26	27.9993	29.9985	24.9988	29.0005	29.0005	29.0005	27.0012	290.005	29.9985	27.0012	240.007	29.9985	32.0009	38.9875	286.012	32.999	32.999	24.9988	246.994	27.9993	32.999
ECL21483/1-4496	311.9	247.992	294.995	276	280.991	271.01	293.997	299.985	302.013	297.989	230.993	246.994	295.993	24.9988	24.9988	260	248.99	276	280.991	304.009	298.987	296.991	296.991	26	296.991	27.0012	29.9985	26	27.9993	26	24.9988	29.0005	29.0005	22.9995	22.9995	304.009	29.9985	22.9995	254.011	29.9985	29.9985	38.9875	299.985	32.999	30.9997	24.9988	260.998	27.9993	32.999
ECL21979/1-4496	311.9	247.992	294.995	276	280.991	271.01	293.997	299.985	302.013	297.989	230.993	246.994	295.993	24.9988	24.9988	260	248.99	276	280.991	304.009	298.987	296.991	296.991	26	296.991	27.0012	29.9985	26	27.9993	29.9985	24.9988	29.0005	29.0005	29.0005	27.0012	304.009	29.9985	27.0012	254.011	29.9985	32.0009	38.9875	299.985	32.999	32.999	24.9988	260.998	27.9993	32.999
ECL22433/1-4496	308.001	247.992	291.003	276	276.998	271.01	293.997	299.985	302.013	297.989	230.993	243.001	295.993	24.9988	24.9988	260	248.99	272.008	276.998	299.985	298.987	292.999	292.999	26	296.991	27.0012	29.9985	26	27.9993	29.9985	24.9988	29.0005	29.0005	29.0005	27.0012	299.985	29.9985	27.0012	254.011	26	27.9993	34.9952	299.985	29.0005	29.0005	24.9988	260.998	27.9993	32.999
ECL21405/1-4496	296.991	232.989	279.993	260.998	265.988	256.008	278.995	285.014	287.01	282.987	217.987	231.991	280.991	26	26	244.997	233.987	260.998	265.988	289.007	283.985	281.989	281.989	27.0012	281.989	27.9993	30.9997	27.0012	29.0005	30.9997	26	29.9985	29.9985	29.9985	27.9993	289.007	30.9997	27.9993	239.009	30.9997	32.999	39.9856	285.014	33.9971	33.9971	26	245.996	29.0005	33.9971
SRR11074152/1-4496	296.991	232.989	277.996	259.002	265.988	256.008	278.995	282.987	285.014	282.987	217.987	231.991	280.991	26	26	244.997	231.991	260.998	263.992	289.007	283.985	279.993	279.993	27.0012	281.989	27.9993	30.9997	24.9988	27.0012	30.9997	26	29.9985	29.9985	27.9993	27.9993	289.007	29.0005	27.9993	239.009	30.9997	30.9997	37.9894	285.014	33.9971	33.9971	26	245.996	27.0012	32.0009
ECL22265/1-4496	308.999	248.99	292.001	276.998	277.996	272.008	294.995	301.015	303.011	298.987	231.991	243.999	296.991	26	26	260.998	249.988	273.006	277.996	301.015	299.985	293.997	293.997	27.0012	297.989	27.9993	30.9997	27.0012	29.0005	30.9997	26	29.9985	29.9985	29.9985	27.9993	301.015	30.9997	27.9993	255.009	27.0012	29.0005	35.9933	301.015	29.9985	29.9985	26	261.996	29.0005	33.9971
SRR11074716/1-4496	297.989	233.987	280.991	261.996	266.986	257.006	279.993	286.012	288.008	283.985	218.985	232.989	281.989	27.0012	27.0012	245.996	234.985	261.996	266.986	290.005	285.014	282.987	282.987	27.9993	282.987	29.0005	32.0009	27.9993	29.9985	32.0009	27.0012	30.9997	30.9997	30.9997	29.0005	290.005	29.9985	29.0005	240.007	32.0009	33.9971	41.0149	286.012	34.9952	34.9952	27.0012	246.994	29.9985	34.9952
SRR7213607/1-4496	302.013	238.011	285.014	265.988	271.01	260.998	283.985	290.005	292.001	288.008	221.012	237.013	286.012	27.0012	27.0012	249.988	239.009	265.988	271.01	293.997	289.007	287.01	287.01	27.9993	287.01	29.0005	32.0009	27.9993	29.9985	32.0009	27.0012	30.9997	30.9997	30.9997	29.0005	293.997	32.0009	29.0005	243.999	32.0009	33.9971	41.0149	290.005	34.9952	34.9952	27.0012	250.986	29.9985	34.9952
SRR11048588/1-4496	298.987	234.985	281.989	262.994	267.984	258.004	280.991	287.01	289.007	285.014	220.014	233.987	282.987	27.9993	27.9993	246.994	236.015	262.994	267.984	291.003	286.012	283.985	283.985	29.0005	283.985	29.9985	32.999	29.0005	30.9997	32.999	27.9993	32.0009	32.0009	32.0009	29.9985	291.003	32.999	29.9985	241.005	32.999	34.9952	42.0129	287.01	35.9933	35.9933	27.9993	247.992	30.9997	35.9933
SRR7213590/1-4496	301.015	237.013	283.985	264.99	270.012	260	282.987	289.007	291.003	287.01	220.014	236.015	285.014	27.9993	27.9993	248.99	238.011	264.99	270.012	292.999	288.008	286.012	286.012	29.0005	286.012	29.9985	32.999	29.0005	30.9997	32.999	27.9993	32.0009	32.0009	32.0009	29.9985	292.999	32.999	29.9985	243.001	32.999	34.9952	42.0129	289.007	35.9933	35.9933	27.9993	249.988	30.9997	35.9933
SRR11046303/1-4496	295.993	236.015	276.998	261.996	264.99	259.002	281.989	286.012	288.008	286.012	221.012	230.993	283.985	29.0005	29.0005	247.992	234.985	260	262.994	288.008	287.01	278.995	278.995	29.9985	285.014	30.9997	33.9971	27.9993	29.9985	33.9971	29.0005	32.999	32.999	30.9997	30.9997	288.008	32.0009	30.9997	242.003	29.9985	29.9985	36.9913	288.008	32.999	32.999	29.0005	248.99	29.9985	34.9952
SRR11074679/1-4496	299.985	236.015	282.987	263.992	269.014	259.002	281.989	288.008	290.005	286.012	221.012	234.985	283.985	29.0005	29.0005	247.992	237.013	263.992	269.014	292.001	287.01	285.014	285.014	29.9985	285.014	30.9997	33.9971	29.9985	32.0009	33.9971	29.0005	32.999	32.999	32.999	30.9997	292.001	33.9971	30.9997	242.003	33.9971	35.9933	43.011	288.008	36.9913	36.9913	29.0005	248.99	32.0009	36.9913
SRR7213581/1-4496	301.015	237.013	283.985	264.99	270.012	260	282.987	289.007	291.003	287.01	222.01	236.015	285.014	29.9985	29.9985	248.99	238.011	264.99	270.012	292.999	288.008	286.012	286.012	30.9997	286.012	32.0009	34.9952	30.9997	32.999	34.9952	29.9985	33.9971	33.9971	33.9971	32.0009	292.999	34.9952	32.0009	243.001	34.9952	36.9913	44.0091	289.007	37.9894	37.9894	29.9985	249.988	32.999	37.9894
SRR7213658/1-4496	301.015	237.013	283.985	264.99	270.012	260	282.987	289.007	291.003	287.01	222.01	236.015	285.014	29.9985	29.9985	248.99	238.011	264.99	270.012	292.999	288.008	286.012	286.012	30.9997	286.012	32.0009	34.9952	30.9997	32.999	34.9952	29.9985	33.9971	33.9971	33.9971	32.0009	292.999	34.9952	32.0009	243.001	34.9952	36.9913	44.0091	289.007	37.9894	37.9894	29.9985	249.988	32.999	37.9894
SRR8901396/1-4496	301.015	237.013	283.985	264.99	270.012	260	282.987	289.007	291.003	287.01	222.01	236.015	285.014	29.9985	29.9985	248.99	238.011	264.99	270.012	292.999	288.008	286.012	286.012	30.9997	286.012	32.0009	34.9952	30.9997	32.999	34.9952	29.9985	33.9971	33.9971	33.9971	32.0009	292.999	34.9952	32.0009	243.001	34.9952	36.9913	44.0091	289.007	37.9894	37.9894	29.9985	249.988	32.999	37.9894
SRR11048595/1-4496	297.989	238.011	278.995	263.992	266.986	260.998	283.985	288.008	290.005	288.008	223.008	232.989	286.012	30.9997	30.9997	249.988	237.013	261.996	264.99	290.005	289.007	280.991	280.991	32.0009	287.01	32.999	35.9933	29.9985	32.0009	35.9933	30.9997	34.9952	34.9952	32.999	32.999	290.005	33.9971	32.999	243.999	32.0009	32.0009	38.9875	290.005	34.9952	34.9952	30.9997	250.986	32.0009	36.9913
SRR11074684/1-4496	302.013	238.011	285.014	265.988	271.01	260.998	283.985	290.005	292.001	288.008	223.008	237.013	286.012	30.9997	30.9997	249.988	239.009	265.988	271.01	293.997	289.007	287.01	287.01	32.0009	287.01	32.999	35.9933	32.0009	33.9971	35.9933	30.9997	34.9952	34.9952	34.9952	32.999	293.997	35.9933	32.999	243.999	35.9933	37.9894	45.0072	290.005	38.9875	38.9875	30.9997	250.986	33.9971	38.9875
SRR7213578/1-4496	304.009	240.007	285.014	265.988	273.006	262.994	286.012	290.005	292.001	290.005	223.008	239.009	288.008	30.9997	30.9997	252.015	239.009	267.984	271.01	295.993	291.003	287.01	287.01	32.0009	289.007	32.999	35.9933	29.9985	32.0009	35.9933	30.9997	34.9952	34.9952	32.999	32.999	295.993	33.9971	32.999	245.996	35.9933	35.9933	43.011	292.001	38.9875	38.9875	30.9997	253.013	32.0009	36.9913
SRR8901404/1-4496	304.009	240.007	287.01	267.984	273.006	262.994	286.012	292.001	293.997	290.005	225.005	239.009	288.008	32.999	32.999	252.015	241.005	267.984	273.006	295.993	291.003	289.007	289.007	33.9971	289.007	34.9952	37.9894	33.9971	35.9933	37.9894	32.999	36.9913	36.9913	36.9913	34.9952	295.993	37.9894	34.9952	245.996	37.9894	39.9856	47.0033	292.001	41.0149	41.0149	32.999	253.013	35.9933	41.0149
SRR8901386/1-4496	305.007	241.005	288.008	269.014	274.004	263.992	287.01	292.999	294.995	291.003	226.003	240.007	289.007	33.9971	33.9971	253.013	242.003	269.014	274.004	296.991	292.001	290.005	290.005	34.9952	290.005	35.9933	38.9875	34.9952	36.9913	38.9875	33.9971	37.9894	37.9894	37.9894	35.9933	296.991	38.9875	35.9933	246.994	38.9875	41.0149	48.0014	292.999	42.0129	42.0129	33.9971	254.011	36.9913	42.0129
SRR6121969/1-4496	306.005	242.003	289.007	270.012	275.002	264.99	288.008	293.997	295.993	292.001	227.001	241.005	290.005	34.9952	34.9952	254.011	243.001	270.012	275.002	297.989	292.999	291.003	291.003	35.9933	291.003	36.9913	39.9856	35.9933	37.9894	39.9856	34.9952	38.9875	38.9875	38.9875	36.9913	297.989	39.9856	36.9913	247.992	39.9856	42.0129	48.9995	293.997	43.011	43.011	34.9952	255.009	37.9894	43.011
SRR7213623/1-4496	308.999	244.997	292.001	273.006	277.996	267.984	291.003	296.991	298.987	294.995	229.995	243.999	292.999	37.9894	37.9894	257.006	245.996	273.006	277.996	301.015	295.993	293.997	293.997	38.9875	293.997	39.9856	43.011	38.9875	41.0149	43.011	37.9894	42.0129	42.0129	42.0129	39.9856	301.015	43.011	39.9856	250.986	43.011	45.0072	51.9937	296.991	46.0052	46.0052	37.9894	258.004	41.0149	46.0052
SRR8901382/1-4496	308.999	244.997	292.001	273.006	277.996	267.984	291.003	296.991	298.987	294.995	229.995	243.999	292.999	37.9894	37.9894	257.006	245.996	273.006	277.996	301.015	295.993	293.997	293.997	38.9875	293.997	39.9856	43.011	38.9875	41.0149	43.011	37.9894	42.0129	42.0129	42.0129	39.9856	301.015	43.011	39.9856	250.986	43.011	45.0072	51.9937	296.991	46.0052	46.0052	37.9894	258.004	41.0149	46.0052
SRR8901452/1-4496	308.999	244.997	292.001	273.006	277.996	267.984	291.003	296.991	298.987	294.995	229.995	243.999	292.999	37.9894	37.9894	257.006	245.996	273.006	277.996	301.015	295.993	293.997	293.997	38.9875	293.997	39.9856	43.011	38.9875	41.0149	43.011	37.9894	42.0129	42.0129	42.0129	39.9856	301.015	41.0149	39.9856	250.986	43.011	45.0072	51.9937	296.991	46.0052	46.0052	37.9894	258.004	41.0149	46.0052
SRR7213588/1-4496	309.997	245.996	292.999	274.004	278.995	269.014	292.001	297.989	299.985	295.993	230.993	244.997	293.997	38.9875	38.9875	258.004	246.994	274.004	278.995	302.013	296.991	294.995	294.995	39.9856	294.995	41.0149	44.0091	39.9856	42.0129	44.0091	38.9875	43.011	43.011	43.011	41.0149	302.013	44.0091	41.0149	252.015	44.0091	46.0052	52.9918	297.989	47.0033	47.0033	38.9875	259.002	42.0129	47.0033
ECL20846/1-4496	333.109	269.014	315.955	296.991	302.013	292.001	315.019	320.945	323.128	319.074	252.015	267.984	316.89	46.0052	46.0052	280.991	270.012	296.991	302.013	325	320.009	318.138	318.138	47.0033	318.138	48.0014	50.9956	47.0033	48.9995	50.9956	46.0052	49.9976	49.9976	49.9976	48.0014	325	50.9956	48.0014	275.002	50.9956	52.9918	60.0096	320.945	53.9899	53.9899	46.0052	281.989	48.9995	51.9937
SRR7213596/1-4496	323.128	259.002	306.005	287.01	292.001	281.989	305.007	310.995	313.148	308.999	243.999	258.004	307.003	51.9937	51.9937	271.01	260	287.01	292.001	315.019	309.997	308.001	308.001	52.9918	308.001	53.9899	57.0153	52.9918	54.988	57.0153	51.9937	55.986	55.986	55.986	53.9899	315.019	57.0153	53.9899	264.99	57.0153	59.0115	65.998	310.995	60.0096	60.0096	51.9937	272.008	54.988	60.0096
SRR7213571/1-4496	339.035	275.002	320.009	301.015	308.001	297.989	320.945	325	326.871	325	260	274.004	323.128	67.9942	67.9942	287.01	274.004	303.011	306.005	330.926	325.935	321.881	321.881	68.9923	324.064	69.9904	72.9846	66.9961	68.9923	72.9846	67.9942	71.9865	71.9865	69.9904	69.9904	330.926	70.9884	69.9904	280.991	72.9846	72.9846	80.0023	326.871	76.01	76.01	67.9942	288.008	68.9923	74.0139
SRR8901398/1-4496	396.113	338.1	383.013	365.859	369.913	359.933	383.949	387.068	388.939	388.004	320.945	336.852	383.949	132.994	132.994	349.016	339.035	364.923	368.042	393.93	386.132	386.132	386.132	133.992	384.885	134.99	137.985	133.992	135.988	137.985	132.994	136.986	136.986	136.986	134.99	393.93	137.985	134.99	343.09	137.985	140.012	146.998	388.004	141.01	141.01	132.994	349.952	135.988	141.01
ECL19517/1-4496	264.99	200.988	247.992	230.993	236.015	224.007	246.994	255.009	257.006	250.986	0	199.99	248.99	206.01	206.01	211	201.986	228.997	233.987	257.006	254.011	249.988	249.988	207.008	252.015	208.006	211	207.008	209.004	211	206.01	210.002	210.002	210.002	208.006	257.006	211	208.006	207.008	211	212.997	220.014	255.009	213.995	213.995	206.01	213.995	209.004	213.995
SRR7213593/1-4496	263.992	199.99	246.994	229.995	234.985	223.008	245.996	254.011	256.008	249.988	102.989	198.992	247.992	207.008	207.008	211.998	200.988	227.999	232.989	256.008	253.013	248.99	248.99	208.006	250.986	209.004	211.998	208.006	210.002	211.998	207.008	211	211	211	209.004	256.008	211.998	209.004	206.01	211.998	213.995	221.012	254.011	214.993	214.993	207.008	212.997	210.002	214.993
ECL19555/1-4496	129.002	27.0012	112.003	98.9971	124.011	115.996	116.994	146.998	148.995	166.991	199.99	0	164.995	222.01	222.01	38.9875	32.0009	116.994	122.015	123.013	169.986	113.999	113.999	223.008	167.989	224.007	227.001	223.008	225.005	227.001	222.01	226.003	226.003	226.003	224.007	168.987	227.001	224.007	14.9993	223.008	225.005	231.991	171.015	226.003	226.003	222.01	39.9856	225.005	229.995
ECL19146/1-4496	133.992	0	116.994	99.9951	129.002	116.994	117.992	147.997	149.993	167.989	200.988	27.0012	165.993	223.008	223.008	39.9856	32.999	122.015	127.006	128.004	171.015	118.99	118.99	224.007	168.987	225.005	227.999	224.007	226.003	227.999	223.008	227.001	227.001	227.001	225.005	174.009	227.999	225.005	33.9971	227.999	229.995	237.013	172.013	230.993	230.993	223.008	41.0149	226.003	230.993
ECL19755/1-4496	134.99	32.999	115.996	98.9971	130	117.992	118.99	146.998	148.995	168.987	201.986	32.0009	166.991	224.007	224.007	45.0072	0	123.013	126.008	129.002	172.013	117.992	117.992	225.005	169.986	226.003	228.997	223.008	225.005	228.997	224.007	227.999	227.999	226.003	226.003	175.007	227.001	226.003	38.9875	228.997	228.997	236.015	173.011	231.991	231.991	224.007	46.0052	225.005	229.995
ECL20408/1-4496	140.012	33.9971	123.013	106.015	134.99	123.013	124.011	153.985	156.012	174.009	207.008	14.9993	172.013	228.997	228.997	46.0052	38.9875	128.004	132.994	133.992	177.003	125.01	125.01	229.995	175.007	230.993	233.987	229.995	231.991	233.987	228.997	232.989	232.989	232.989	230.993	179.997	233.987	230.993	0	233.987	236.015	243.001	178.001	237.013	237.013	228.997	47.0033	231.991	237.013
ECL22741/1-4496	286.012	226.003	266.986	254.011	257.006	248.99	272.008	276	277.996	276	129.002	221.012	274.004	232.989	232.989	238.011	225.005	249.988	253.013	277.996	278.995	269.014	269.014	233.987	276.998	234.985	238.011	231.991	233.987	238.011	232.989	237.013	237.013	234.985	234.985	277.996	236.015	234.985	231.991	233.987	233.987	241.005	279.993	237.013	237.013	232.989	239.009	233.987	239.009
ECL19751/1-4496	146	39.9856	129.002	112.003	141.01	129.002	130	160.005	162.001	179.997	211	38.9875	178.001	234.985	234.985	0	45.0072	133.992	139.014	140.012	182.992	130.998	130.998	236.015	180.996	237.013	240.007	236.015	238.011	240.007	234.985	239.009	239.009	239.009	237.013	185.986	240.007	237.013	46.0052	240.007	242.003	248.99	183.99	243.001	243.001	234.985	52.9918	238.011	243.001
ECL20721/1-4496	146.998	41.0149	130	113.001	142.008	130	130.998	161.003	162.999	180.996	213.995	39.9856	178.999	236.015	236.015	52.9918	46.0052	134.99	140.012	141.01	183.99	131.996	131.996	237.013	181.994	238.011	241.005	237.013	239.009	241.005	236.015	240.007	240.007	240.007	238.011	187.015	241.005	238.011	47.0033	241.005	243.001	249.988	184.988	243.999	243.999	236.015	0	239.009	243.999
ECL20906/1-4496	143.006	41.0149	126.008	113.001	137.985	130	130.998	161.003	162.999	180.996	213.995	35.9933	178.999	236.015	236.015	52.9918	46.0052	130.998	135.988	136.986	183.99	128.004	128.004	237.013	181.994	238.011	241.005	237.013	239.009	241.005	236.015	240.007	240.007	240.007	238.011	182.992	241.005	238.011	47.0033	237.013	239.009	245.996	184.988	240.007	240.007	236.015	11.9988	239.009	243.999
ECL21975/1-4496	146.998	48.9995	130	116.994	142.008	133.992	134.99	162.999	164.995	184.988	217.987	44.0091	182.992	240.007	240.007	61.0076	37.9894	134.99	140.012	141.01	188.013	131.996	131.996	241.005	185.986	242.003	244.997	241.005	243.001	244.997	240.007	243.999	243.999	243.999	242.003	187.015	244.997	242.003	54.988	241.005	243.001	249.988	189.011	243.999	243.999	240.007	62.0057	243.001	247.992
ECL19390/1-4496	180.996	116.994	163.997	146.998	35.9933	0	164.995	54.988	59.0115	191.008	224.007	115.996	189.011	245.996	245.996	129.002	117.992	4.99976	35.9933	175.007	194.002	165.993	165.993	246.994	192.006	247.992	250.986	246.994	248.99	250.986	245.996	249.988	249.988	249.988	247.992	196.996	250.986	247.992	123.013	250.986	253.013	260	195	254.011	254.011	245.996	130	248.99	254.011
ECL19345/1-4496	113.999	99.9951	95.0047	0	159.007	146.998	103.987	176.005	178.001	197.994	230.993	98.9971	195.998	250.986	250.986	112.003	98.9971	151.989	155.014	113.999	200.988	97.0009	97.0009	252.015	198.992	253.013	256.008	249.988	252.015	256.008	250.986	255.009	255.009	253.013	253.013	204.014	254.011	253.013	106.015	256.008	256.008	262.994	201.986	259.002	259.002	250.986	113.001	252.015	257.006
ECL19763/1-4496	181.994	122.015	164.995	151.989	36.9913	4.99976	169.986	60.0096	64.0019	195.998	228.997	116.994	194.002	250.986	250.986	133.992	123.013	0	36.9913	176.005	198.992	166.991	166.991	252.015	196.996	253.013	256.008	252.015	254.011	256.008	250.986	255.009	255.009	255.009	253.013	197.994	256.008	253.013	128.004	252.015	254.011	260.998	199.99	255.009	255.009	250.986	134.99	254.011	259.002
SRR8901388/1-4496	209.004	145.002	192.006	173.011	179.997	167.989	193.004	198.992	200.988	175.007	229.995	144.004	173.011	252.015	252.015	157.01	146	173.011	178.001	202.985	176.005	194.002	194.002	253.013	176.005	254.011	257.006	253.013	255.009	257.006	252.015	256.008	256.008	256.008	254.011	180.996	257.006	254.011	150.991	257.006	259.002	265.988	178.999	260	260	252.015	158.009	255.009	260
SRR11048592/1-4496	178.001	113.999	161.003	142.008	164.995	152.987	162.001	183.99	185.986	204.014	237.013	113.001	201.986	255.009	255.009	126.008	114.998	158.009	162.999	172.013	207.008	162.999	162.999	256.008	205.012	257.006	260	256.008	258.004	260	255.009	259.002	259.002	259.002	257.006	210.002	259.002	257.006	119.988	260	261.996	269.014	208.006	262.994	262.994	255.009	127.006	258.004	262.994
ECL19885/1-4496	187.015	127.006	167.989	155.014	44.0091	35.9933	175.007	65	68.9923	200.988	233.987	122.015	198.992	256.008	256.008	139.014	126.008	36.9913	0	180.996	204.014	169.986	169.986	257.006	201.986	258.004	260.998	255.009	257.006	260.998	256.008	260	260	258.004	258.004	202.985	259.002	258.004	132.994	257.006	257.006	263.992	205.012	260	260	256.008	140.012	257.006	261.996
ECL19373/1-4496	189.011	129.002	172.013	159.007	0	35.9933	177.003	66.9961	70.9884	202.985	236.015	124.011	200.988	256.008	256.008	141.01	130	36.9913	44.0091	182.992	206.01	174.009	174.009	257.006	204.014	258.004	260.998	257.006	259.002	260.998	256.008	260	260	260	258.004	205.012	260.998	258.004	134.99	257.006	259.002	265.988	207.008	260	260	256.008	142.008	259.002	263.992
SRR8157048/1-4496	174.009	110.007	157.01	140.012	168.987	157.01	158.009	188.013	190.009	208.006	241.005	109.009	206.01	262.994	262.994	122.015	111.005	162.001	166.991	167.989	211	159.007	159.007	263.992	209.004	264.99	267.984	263.992	265.988	267.984	262.994	266.986	266.986	266.986	264.99	213.995	266.986	264.99	115.996	267.984	270.012	276.998	211.998	271.01	271.01	262.994	123.013	265.988	271.01
ECL19403/1-4496	137.985	117.992	120.986	103.987	177.003	164.995	0	195.998	197.994	213.995	246.994	116.994	211.998	269.014	269.014	130	118.99	169.986	175.007	14.0012	216.989	123.013	123.013	270.012	214.993	271.01	274.004	270.012	272.008	274.004	269.014	273.006	273.006	273.006	271.01	220.014	274.004	271.01	124.011	274.004	276	282.987	217.987	276.998	276.998	269.014	130.998	272.008	276.998
ECL19187/1-4496	127.006	116.994	0	95.0047	172.013	163.997	120.986	193.004	195	214.993	247.992	112.003	212.997	270.012	270.012	129.002	115.996	164.995	167.989	127.006	217.987	67.9942	67.9942	271.01	215.991	272.008	275.002	269.014	271.01	275.002	270.012	274.004	274.004	272.008	272.008	216.989	273.006	272.008	123.013	271.01	271.01	277.996	218.985	274.004	274.004	270.012	130	271.01	276
ECL19641/1-4496	229.995	165.993	212.997	195.998	200.988	189.011	211.998	220.014	222.01	24.0007	248.99	164.995	0	271.01	271.01	178.001	166.991	194.002	198.992	222.01	9.00143	214.993	214.993	272.008	6.99904	273.006	276	272.008	274.004	276	271.01	275.002	275.002	275.002	273.006	29.9985	276	273.006	172.013	276	277.996	285.014	9.99951	278.995	278.995	271.01	178.999	274.004	278.995
ECL19901/1-4496	129.002	118.99	67.9942	97.0009	174.009	165.993	123.013	195	196.996	216.989	249.988	113.999	214.993	272.008	272.008	130.998	117.992	166.991	169.986	129.002	220.014	0	0	273.006	217.987	274.004	276.998	271.01	273.006	276.998	272.008	276	276	274.004	274.004	218.985	275.002	274.004	125.01	273.006	273.006	279.993	221.012	276	276	272.008	131.996	273.006	277.996
ECL19902/1-4496	129.002	118.99	67.9942	97.0009	174.009	165.993	123.013	195	196.996	216.989	249.988	113.999	214.993	272.008	272.008	130.998	117.992	166.991	169.986	129.002	220.014	0	0	273.006	217.987	274.004	276.998	271.01	273.006	276.998	272.008	276	276	274.004	274.004	218.985	275.002	274.004	125.01	273.006	273.006	279.993	221.012	276	276	272.008	131.996	273.006	277.996
ECL19939/1-4496	232.989	168.987	215.991	198.992	204.014	192.006	214.993	223.008	225.005	24.9988	252.015	167.989	6.99904	272.008	272.008	180.996	169.986	196.996	201.986	225.005	8.00023	217.987	217.987	273.006	0	274.004	276.998	273.006	275.002	276.998	272.008	276	276	276	274.004	32.999	276.998	274.004	175.007	276.998	278.995	286.012	6.99904	279.993	279.993	272.008	181.994	275.002	279.993
ECL19508/1-4496	231.991	167.989	214.993	197.994	202.985	191.008	213.995	222.01	224.007	0	250.986	166.991	24.0007	273.006	273.006	179.997	168.987	195.998	200.988	224.007	29.0005	216.989	216.989	274.004	24.9988	275.002	277.996	274.004	276	277.996	273.006	276.998	276.998	276.998	275.002	8.00023	277.996	275.002	174.009	277.996	279.993	287.01	27.9993	280.991	280.991	273.006	180.996	276	280.991
ECL19894/1-4496	234.985	171.015	217.987	200.988	206.01	194.002	216.989	225.005	227.001	29.0005	254.011	169.986	9.00143	274.004	274.004	182.992	172.013	198.992	204.014	227.001	0	220.014	220.014	275.002	8.00023	276	278.995	275.002	276.998	278.995	274.004	277.996	277.996	277.996	276	34.9952	278.995	276	177.003	278.995	280.991	288.008	2.99985	281.989	281.989	274.004	183.99	276.998	281.989
ECL19414/1-4496	211.998	147.997	193.004	176.005	66.9961	54.988	195.998	0	6.00096	222.01	255.009	146.998	220.014	275.002	275.002	160.005	146.998	60.0096	65	206.01	225.005	195	195	276	223.008	276.998	279.993	274.004	276	279.993	275.002	278.995	278.995	276.998	276.998	227.999	277.996	276.998	153.985	279.993	279.993	287.01	226.003	282.987	282.987	275.002	161.003	276	280.991
ECL20550/1-4496	236.015	172.013	218.985	201.986	207.008	195	217.987	226.003	227.999	27.9993	255.009	171.015	9.99951	275.002	275.002	183.99	173.011	199.99	205.012	227.999	2.99985	221.012	221.012	276	6.99904	276.998	279.993	276	277.996	279.993	275.002	278.995	278.995	278.995	276.998	35.9933	279.993	276.998	178.001	279.993	281.989	289.007	0	282.987	282.987	275.002	184.988	277.996	282.987
ECL21584/1-4496	236.015	172.013	218.985	201.986	207.008	195	217.987	226.003	227.999	27.9993	255.009	171.015	8.00023	275.002	275.002	183.99	173.011	199.99	205.012	227.999	13	221.012	221.012	276	9.00143	276.998	279.993	276	277.996	279.993	275.002	278.995	278.995	278.995	276.998	35.9933	279.993	276.998	178.001	279.993	281.989	289.007	11.9988	282.987	282.987	275.002	184.988	277.996	282.987
ECL19427/1-4496	213.995	149.993	195	178.001	70.9884	59.0115	197.994	6.00096	0	224.007	257.006	148.995	222.01	276.998	276.998	162.001	148.995	64.0019	68.9923	208.006	227.001	196.996	196.996	277.996	225.005	278.995	281.989	276	277.996	281.989	276.998	280.991	280.991	278.995	278.995	229.995	279.993	278.995	156.012	281.989	281.989	289.007	227.999	285.014	285.014	276.998	162.999	277.996	282.987
ECL19889/1-4496	144.004	128.004	127.006	113.999	182.992	175.007	14.0012	206.01	208.006	224.007	257.006	123.013	222.01	278.995	278.995	140.012	129.002	176.005	180.996	0	227.001	129.002	129.002	279.993	225.005	280.991	283.985	279.993	281.989	283.985	278.995	282.987	282.987	282.987	280.991	226.003	283.985	280.991	133.992	279.993	281.989	289.007	227.999	282.987	282.987	278.995	141.01	281.989	287.01
ECL20308/1-4496	233.987	174.009	216.989	204.014	205.012	196.996	220.014	227.999	229.995	8.00023	257.006	168.987	29.9985	278.995	278.995	185.986	175.007	197.994	202.985	226.003	34.9952	218.985	218.985	279.993	32.999	280.991	283.985	279.993	281.989	283.985	278.995	282.987	282.987	282.987	280.991	0	283.985	280.991	179.997	279.993	281.989	289.007	35.9933	282.987	282.987	278.995	187.015	281.989	287.01
ECL22487/1-4496	239.009	177.003	222.01	205.012	211.998	199.99	221.012	230.993	232.989	32.999	260	176.005	13	281.989	281.989	189.011	178.001	205.012	210.002	230.993	19.999	224.007	224.007	282.987	16.0005	283.985	287.01	282.987	285.014	287.01	281.989	286.012	286.012	286.012	283.985	41.0149	287.01	283.985	182.992	287.01	289.007	295.993	19.0009	290.005	290.005	281.989	190.009	285.014	290.005
ECL19125/1-4496	0	133.992	127.006	113.999	189.011	180.996	137.985	211.998	213.995	231.991	264.99	129.002	229.995	287.01	287.01	146	134.99	181.994	187.015	144.004	234.985	129.002	129.002	288.008	232.989	289.007	292.001	288.008	290.005	292.001	287.01	291.003	291.003	291.003	289.007	233.987	292.001	289.007	140.012	288.008	290.005	296.991	236.015	291.003	291.003	287.01	146.998	290.005	294.995
SRR7213572/1-4496	188.013	158.009	171.015	151.989	216.989	205.012	172.013	236.015	238.011	256.008	289.007	157.01	254.011	308.999	308.999	169.986	159.007	210.002	214.993	181.994	259.002	173.011	173.011	309.997	257.006	310.995	314.083	309.997	311.9	314.083	308.999	313.148	313.148	313.148	310.995	261.996	314.083	310.995	163.997	314.083	315.955	323.128	260	316.89	316.89	308.999	171.015	311.9	316.89
SRR7213599/1-4496	297.989	233.987	280.991	263.992	269.014	257.006	281.989	288.008	290.005	286.012	313.148	232.989	283.985	333.109	333.109	245.996	234.985	261.996	266.986	292.001	287.01	282.987	282.987	334.045	285.014	334.981	338.1	334.045	335.916	338.1	333.109	336.852	336.852	336.852	334.981	292.001	338.1	334.981	240.007	338.1	339.971	347.145	288.008	340.907	340.907	333.109	246.994	335.916	340.907
SRR11047446/1-4496	272.008	208.006	255.009	240.007	131.996	120.986	257.006	118.99	123.013	278.995	315.019	207.008	277.996	339.035	339.035	220.014	210.002	126.008	132.994	266.986	282.987	258.004	258.004	339.035	280.991	340.907	344.026	339.971	342.154	344.026	339.035	343.09	343.09	343.09	340.907	285.014	344.026	340.907	213.995	343.09	345.897	353.071	283.985	347.145	347.145	339.035	220.014	342.154	347.145
ECL21415/1-4496	493.114	435.101	475.959	466.914	462.86	455.998	481.885	483.133	485.005	483.133	418.882	428.863	480.95	444.146	444.146	446.953	436.972	456.933	460.988	489.059	485.94	479.078	479.078	445.081	484.069	446.017	449.136	445.081	446.953	449.136	444.146	447.888	447.888	447.888	446.017	483.133	447.888	446.017	440.091	445.081	446.017	454.126	486.876	446.953	447.888	444.146	446.953	446.953	450.072
SRR8901439/1-4496	396.113	347.145	388.004	365.859	392.994	383.949	388.004	408.901	411.084	431.046	460.988	345.897	431.046	484.069	484.069	358.061	348.08	388.939	391.123	397.049	435.101	389.875	389.875	485.005	432.917	485.94	489.059	485.005	486.876	489.059	484.069	488.123	488.123	488.123	485.94	437.908	489.059	485.94	353.071	489.059	490.931	498.104	435.101	489.995	491.866	484.069	358.061	486.876	490.931
SRR11048585/1-4496	810.004	751.991	789.107	774.136	780.998	771.952	789.107	787.859	789.107	795.969	745.129	753.862	792.85	585.124	585.124	762.907	755.11	776.007	780.998	798.152	795.969	790.978	790.978	586.06	795.033	586.996	587.932	586.06	587.932	590.115	585.124	587.932	587.932	588.867	586.996	800.024	587.932	586.996	756.981	590.115	591.051	597.912	798.152	592.922	592.922	585.124	765.091	586.996	592.922
	37.9894
[truncated: 143 more columns]
