# Supplementary material for: High Risk Clone: A Proposal of Criteria Adapted to the One Health Context with Application to Enterotoxigenic Escherichia coli in the Pig Population
Source: Antibiotics (Basel). 2021 Feb 28;10(3):244. doi: 10.3390/antibiotics10030244 (PMC8000703; doi:10.3390/antibiotics10030244)
Supplement: Supplementary file 1 [file antibiotics-10-00244-s001.zip › TableS14_metadata.xlsx]

## Sheet: metadata
id_isolate	Country	State/Province	year	serogroup_CSI	phylogroup_clermont	ST_CSI	FimH_CSI	Stage_of_production
ECL00103	Canada	Quebec	1997	O149:H43	C	ST90	fimH54	growing-finishing
ECL00351	Canada	Quebec	2004	O149:H10	A	ST100	No FimH	weaning
ECL00652	Canada	Quebec	2001	O149:H10	A	ST100	No FimH	weaning
ECL01302	Canada	Quebec	1990	O149:H43	C	ST90	fimH54	unknown
ECL01669	Canada	Quebec	1990	O149:H43	C	ST90	fimH54	unknown
ECL01947	Canada	Quebec	1992	O157:H43	C	ST90	fimH54	Lactation
ECL02602	Canada	Quebec	1991	O149:H43	C	ST90	fimH54	unknown
ECL02964	Canada	Quebec	1993	O149:H43	C	ST90	fimH54	unknown
ECL03391	Canada	Quebec	1990	O149:H43	C	ST90	fimH54	unknown
ECL04323	Canada	Quebec	1990	O149:H43	C	ST90	fimH54	unknown
ECL04937	Canada	Quebec	1994	O149:H43	C	ST90	fimH54	Lactation
ECL05380	Canada	Quebec	1991	O149:H19	C	ST90	fimH54	unknown
ECL05543	Canada	Quebec	1992	O149:H43	C	ST90	fimH54	weaning
ECL05958	Canada	Quebec	1993	O149:H19	C	ST90	fimH54	unknown
ECL06007	Canada	Quebec	1993	O149:H43	C	ST90	fimH54	unknown
ECL07310	Canada	Quebec	1992	O149:H43	C	ST90	fimH54	weaning
ECL07805	Canada	Quebec	1997	O149:H10	A	ST100	No FimH	weaning
ECL08334	Canada	Quebec	1995	O149:H19	C	ST90	fimH54	weaning
ECL08786	Canada	Quebec	2000	O149:H43	C	ST90	fimH54	Lactation
ECL09114	Canada	Quebec	2000	O149:H10	A	ST100	No FimH	weaning
ECL09646	Canada	Quebec	1996	O149:H10	A	ST100	No FimH	Lactation
ECL10170	Canada	Quebec	2002	O149:H10	A	ST100	No FimH	unknown
ECL10647	Canada	Quebec	2003	O149:H10	A	ST100	No FimH	growing-finishing
ECL11171	Canada	Quebec	2004	O149:H10	A	ST100	No FimH	weaning
ECL11324	Canada	Quebec	2004	O149:H10	A	ST100	No FimH	weaning
ECL13086	Canada	Quebec	2005	O149:H10	A	ST100	No FimH	unknown
ECL13345	Canada	Quebec	2005	O149:H10	A	ST100	No FimH	growing-finishing
ECL14048	Canada	Quebec	2006	O149:H10	A	ST100	No FimH	unknown
ECL14672	Canada	Quebec	2007	O159:H19	C	ST90	fimH54	weaning
ECL16273	Canada	Quebec	2009	O138:H10	A	ST100	No FimH	weaning
ECL17377	Canada	Quebec	2010	O138:H10	A	ST100	No FimH	Lactation
ECL17896	Canada	Quebec	2011	O149:H19	C	ST90	fimH54	weaning
ECL18172	Canada	Quebec	2011	O149:H10	A	ST100	No FimH	unknown
ECL18573	Canada	Quebec	2011	O149:H10	A	ST100	No FimH	Lactation
ECL18728	Canada	Quebec	2012	O149:H10	A	ST100	No FimH	growing-finishing
ECL19125	Canada	Quebec	2013	O149:H10	A	ST100	No FimH	weaning
ECL19146	Canada	Quebec	2013	O149:H10	A	ST100	No FimH	growing-finishing
ECL19148	Canada	Quebec	2013	O149:H19	C	ST90	fimH54	weaning
ECL19153	Canada	Quebec	2013	O149:H19	C	ST90	fimH54	weaning
ECL19159	Canada	Quebec	2013	O149:H10	A	ST100	No FimH	Lactation
ECL19187	Canada	Quebec	2013	O149:H10	A	ST100	No FimH	weaning
ECL19345	Canada	Quebec	2013	O149:H10	A	ST100	No FimH	weaning
ECL19373	Canada	Quebec	2013	O149:H10	A	ST100	No FimH	weaning
ECL19390	Canada	Quebec	2013	O149:H10	A	ST100	No FimH	weaning
ECL19403	Canada	Quebec	2013	O149:H10	A	ST100	No FimH	growing-finishing
ECL19414	Canada	Quebec	2013	O149:H10	A	ST100	No FimH	weaning
ECL19427	Canada	Quebec	2013	O149:H10	A	ST100	No FimH	weaning
ECL19508	Canada	Quebec	2013	O149:H10	A	ST100	No FimH	weaning
ECL19517	Canada	Quebec	2013	O149:H10	A	ST100	No FimH	growing-finishing
ECL19555	Canada	Quebec	2013	O149:H10	A	ST100	No FimH	Lactation
ECL19602	Canada	Quebec	2013	O138:H10	A	ST100	No FimH	weaning
ECL19641	Canada	Quebec	2013	O149:H10	A	ST100	No FimH	weaning
ECL19664	Canada	Quebec	2013	O149:H10	A	ST100	No FimH	Lactation
ECL19668	Canada	Quebec	2013	O149:H10	A	ST100	No FimH	Lactation
ECL19751	Canada	Quebec	2013	O149:H10	A	ST100	No FimH	unknown
ECL19755	Canada	Quebec	2013	O149:H10	A	ST100	No FimH	weaning
ECL19763	Canada	Quebec	2014	O149:H10	A	ST100	No FimH	weaning
ECL19788	Canada	Quebec	2014	O149:H19	C	ST90	fimH54	weaning
ECL19820	Canada	Quebec	2014	O138:H10	A	ST100	No FimH	weaning
ECL19885	Canada	Quebec	2014	O149:H10	A	ST100	No FimH	weaning
ECL19889	Canada	Quebec	2014	O149:H10	A	ST100	No FimH	Lactation
ECL19894	Canada	Quebec	2014	O149:H10	A	ST100	No FimH	weaning
ECL19901	Canada	Quebec	2014	O149:H10	A	ST100	No FimH	weaning
ECL19902	Canada	Quebec	2014	O149:H10	A	ST100	No FimH	weaning
ECL19916	Canada	Quebec	2014	O149:H10	A	ST100	No FimH	Lactation
ECL19931	Canada	Quebec	2014	O138:H10	A	ST100	No FimH	weaning
ECL19939	Canada	Quebec	2014	O149:H10	A	ST100	No FimH	weaning
ECL19990	Canada	Quebec	2014	O138:H10	A	ST100	No FimH	weaning
ECL20013	Canada	Quebec	2014	O149:H10	A	ST100	No FimH	weaning
ECL20014	Canada	Quebec	2014	O149:H10	A	ST100	No FimH	weaning
ECL20015	Canada	Quebec	2014	O149:H10	A	ST100	No FimH	weaning
ECL20018	Canada	Quebec	2014	O149:H10	A	ST100	No FimH	Lactation
ECL20209	Canada	Quebec	2014	O149:H10	A	ST100	No FimH	weaning
ECL20212	Canada	Quebec	2014	O149:H10	A	ST100	No FimH	Lactation
ECL20223	Canada	Quebec	2014	O149:H19	C	ST90	fimH54	weaning
ECL20239	Canada	Quebec	2014	O149:H10	A	ST100	No FimH	weaning
ECL20256	Canada	Quebec	2014	O149:H10	A	ST100	No FimH	Lactation
ECL20278	Canada	Quebec	2015	O149:H10	A	ST100	No FimH	unknown
ECL20290	Canada	Quebec	2015	O149:H10	A	ST100	No FimH	weaning
ECL20308	Canada	Quebec	2015	O149:H10	A	ST100	No FimH	weaning
ECL20389	Canada	Quebec	2015	O149:H10	A	ST100	No FimH	weaning
ECL20395	Canada	Quebec	2015	O159:H17	C	ST23	fimH54	weaning
ECL20404	Canada	Quebec	2015	O149:H10	A	ST100	No FimH	weaning
ECL20408	Canada	Quebec	2015	O149:H10	A	ST100	No FimH	weaning
ECL20435	Canada	Quebec	2015	O149:H10	A	ST100	No FimH	weaning
ECL20436	Canada	Quebec	2015	O149:H10	A	ST100	No FimH	weaning
ECL20462	Canada	Quebec	2015	O149:H19	C	ST90	fimH54	weaning
ECL20544	Canada	Quebec	2015	O149:H10	A	ST100	No FimH	weaning
ECL20550	Canada	Quebec	2015	O149:H10	A	ST100	No FimH	weaning
ECL20566	Canada	Quebec	2015	O149:H10	A	ST100	No FimH	weaning
ECL20622	Canada	Quebec	2015	O149:H10	A	ST100	No FimH	Lactation
ECL20627	Canada	Quebec	2015	O149:H10	A	ST100	No FimH	weaning
ECL20721	Canada	Quebec	2015	O149:H10	A	ST100	No FimH	weaning
ECL20725	Canada	Quebec	2015	O149:H10	A	ST100	No FimH	weaning
ECL20769	Canada	Quebec	2015	O149:H19	A	ST100	No FimH	weaning
ECL20776	Canada	Quebec	2015	O149:H10	A	ST100	No FimH	weaning
ECL20778	Canada	Quebec	2015	O149:H10	A	ST100	No FimH	weaning
ECL20797	Canada	Quebec	2015	O138:H10	A	ST100	No FimH	weaning
ECL20814	Canada	Quebec	2015	O149:H10	A	ST100	No FimH	weaning
ECL20836	Canada	Quebec	2016	O149:H10	A	ST100	No FimH	weaning
ECL20846	Canada	Quebec	2016	O149:H10	A	ST100	No FimH	weaning
ECL20850	Canada	Quebec	2016	O149:H10	A	ST100	No FimH	weaning
ECL20887	Canada	Quebec	2016	O149:H10	A	ST100	No FimH	weaning
ECL20896	Canada	Quebec	2016	O149:H10	A	ST100	No FimH	weaning
ECL20906	Canada	Quebec	2016	O149:H10	A	ST100	No FimH	growing-finishing
ECL20911	Canada	Quebec	2016	O149:H10	A	ST100	No FimH	unknown
ECL20918	Canada	Quebec	2016	O149:H10	A	ST100	No FimH	unknown
ECL20924	Canada	Quebec	2016	O149:H10	A	ST100	No FimH	growing-finishing
ECL21170	Canada	Quebec	2016	O159:H19	C	ST90	fimH54	weaning
ECL21259	Canada	Quebec	2016	O149:H10	A	ST100	No FimH	weaning
ECL21274	Canada	Quebec	2016	O149:H10	A	ST100	No FimH	weaning
ECL21290	Canada	Manitoba	2016	O149:H10	A	ST100	No FimH	unknown
ECL21405	Canada	Quebec	2016	O149:H10	A	ST100	No FimH	weaning
ECL21412	Canada	Ontario	2016	O149:H10	A	ST100	No FimH	weaning
ECL21415	Canada	Quebec	2016	O149:H10	A	ST100	No FimH	weaning
ECL21464	Canada	Quebec	2016	O23:H37	A	ST772	fimH54	weaning
ECL21483	Canada	Quebec	2016	O149:H10	A	ST100	No FimH	Lactation
ECL21505	Canada	Quebec	2016	O149:H10	A	ST100	No FimH	weaning
ECL21512	Canada	Quebec	2016	O149:H10	A	ST100	No FimH	weaning
ECL21518	Canada	Quebec	2016	O149:H10	A	ST100	No FimH	weaning
ECL21541	Canada	Quebec	2016	O149:H10	A	ST100	No FimH	weaning
ECL21542	Canada	Quebec	2016	O149:H10	A	ST100	No FimH	weaning
ECL21551	Canada	Quebec	2016	O149:H10	A	ST100	No FimH	weaning
ECL21584	Canada	Quebec	2016	O149:H10	A	ST100	No FimH	Lactation
ECL21628	Canada	Quebec	2017	O149:H10	A	ST100	No FimH	weaning
ECL21652	Canada	Quebec	2017	O149:H10	A	ST100	No FimH	weaning
ECL21655	Canada	Quebec	2017	O149:H10	A	ST100	No FimH	weaning
ECL21657	Canada	Quebec	2017	O149:H10	A	ST100	No FimH	weaning
ECL21676	Canada	Quebec	2017	O149:H10	A	ST100	No FimH	weaning
ECL21680	Canada	Quebec	2016	O149:H10	A	ST100	No FimH	weaning
ECL21730	Canada	Quebec	2017	O149:H10	A	ST100	No FimH	weaning
ECL21732	Canada	Quebec	2017	O23:H37	A	ST772	fimH54	weaning
ECL21756	Canada	Quebec	2017	O138:H10	A	ST100	No FimH	weaning
ECL21837	Canada	Quebec	2017	O149:H10	A	ST100	No FimH	weaning
ECL21975	Canada	Quebec	2017	O149:H10	A	ST100	No FimH	growing-finishing
ECL21979	Canada	Quebec	2017	O149:H10	A	ST100	No FimH	weaning
ECL22052	Canada	Quebec	2017	O149:H10	A	ST100	No FimH	Lactation
ECL22093	Canada	Quebec	2017	O149:H10	A	ST100	No FimH	weaning
ECL22099	Canada	Quebec	2017	O149:H10	A	ST100	No FimH	weaning
ECL22128	Canada	Quebec	2017	O149:H10	A	ST100	No FimH	weaning
ECL22134	Canada	Quebec	2017	O149:H10	A	ST100	No FimH	weaning
ECL22146	Canada	Quebec	2017	O23:H37	A	ST772	fimH54	weaning
ECL22172	Canada	Quebec	2017	O23:H37	A	ST772	fimH54	weaning
ECL22215	Canada	Quebec	2017	O149:H10	A	ST100	No FimH	weaning
ECL22265	Canada	Quebec	2017	O149:H10	A	ST100	No FimH	Lactation
ECL22274	Canada	Quebec	2017	O149:H10	A	ST100	No FimH	weaning
ECL22293	Canada	Quebec	2017	O149:H10	A	ST100	No FimH	weaning
ECL22298	Canada	Quebec	2017	O149:H10	A	ST100	No FimH	Lactation
ECL22341	Canada	Quebec	2017	O138:H10	A	ST100	No FimH	weaning
ECL22433	Canada	Quebec	2018	O149:H10	A	ST100	No FimH	Lactation
ECL22438	Canada	Quebec	2018	O149:H10	A	ST100	No FimH	weaning
ECL22447	Canada	Quebec	2018	O149:H10	A	ST100	No FimH	weaning
ECL22487	Canada	Quebec	2018	O149:H10	A	ST100	No FimH	weaning
ECL22491	Canada	Quebec	2018	O149:H10	A	ST100	No FimH	weaning
ECL22503	Canada	Quebec	2018	O149:H10	A	ST100	No FimH	weaning
ECL22505	Canada	Quebec	2018	O149:H10	A	ST100	No FimH	unknown
ECL22529	Canada	Quebec	2018	O138:H10	A	ST100	No FimH	weaning
ECL22536	Canada	Quebec	2018	O149:H10	A	ST100	No FimH	weaning
ECL22553	Canada	Quebec	2018	O149:H10	A	ST100	No FimH	weaning
ECL22653	Canada	Quebec	2018	O138:H10	A	ST100	No FimH	weaning
ECL22730	Canada	Quebec	2018	O23:H37	A	ST772	fimH54	growing-finishing
ECL22741	Canada	Quebec	2018	O149:H10	A	ST100	No FimH	weaning
ECL22749	Canada	Quebec	2018	O23:H37	A	ST772	fimH54	weaning
ECL22774	Canada	Quebec	2018	O149:H19	C	ST90	fimH54	weaning
ECL22800	Canada	Quebec	2018	O149:H10	A	ST100	No FimH	weaning
ECL22867	Canada	Quebec	2018	O149:H10	A	ST100	No FimH	weaning
ECL22868	Canada	Quebec	2018	O149:H10	A	ST100	No FimH	weaning
ECL22882	Canada	Quebec	2018	O23:H37	A	ST772	fimH54	weaning
ECL22887	Canada	Quebec	2018	O149:H10	A	ST100	No FimH	Lactation
ECL22967	Canada	Quebec	2018	O149:H10	A	ST100	No FimH	weaning
ECL23013	Canada	Quebec	2018	O149:H10	A	ST100	No FimH	weaning
ECL23067	Canada	Quebec	2018	O149:H10	A	ST100	No FimH	unknown
ECL85531	Canada	Quebec	1995	O149:H10	A	ST100	No FimH	growing-finishing
SRR11045320	USA	MN	2015	O149:H10	A	ST100	No FimH	NA
SRR11045323	USA	MO	2015	O149:H10	A	ST100	No FimH	NA
SRR11045324	USA	MN	2015	O149:H10	A	ST100	No FimH	NA
SRR11046294	USA	TX	2014	O149:H10	A	ST100	No FimH	NA
SRR11046297	USA	IA	2015	O149:H10	A	ST100	No FimH	NA
SRR11046300	USA	MN	2014	O149:H10	A	ST100	No FimH	NA
SRR11046301	USA	MN	2015	O149:H10	A	ST100	No FimH	NA
SRR11046303	USA	OK	2014	O149:H10	A	ST100	No FimH	NA
SRR11046874	USA	MN	2015	O149:H10	A	ST100	No FimH	NA
SRR11046875	USA	MN	2014	O149:H10	A	ST100	No FimH	NA
SRR11046877	USA	OK	2014	O149:H10	A	ST100	No FimH	NA
SRR11046878	USA	MN	2014	O149:H10	A	ST100	No FimH	NA
SRR11047446	USA	MI	2015	O149:H10	A	ST100	No FimH	NA
SRR11048585	USA	OK	2015	O149:H10	A	ST100	No FimH	NA
SRR11048588	USA	MO	2015	O149:H10	A	ST100	No FimH	NA
SRR11048592	USA	MN	2015	O149:H10	A	ST100	No FimH	NA
SRR11048595	USA	IA	2015	O149:H10	A	ST100	No FimH	NA
SRR11048596	USA	MN	2015	O149:H10	A	ST100	No FimH	NA
SRR11074150	USA	MO	2015	O149:H10	A	ST100	No FimH	NA
SRR11074152	USA	OK	2015	O149:H10	A	ST100	No FimH	NA
SRR11074153	USA	TX	2015	O149:H10	A	ST100	No FimH	NA
SRR11074174	USA	IA	2015	O149:H10	A	ST100	No FimH	NA
SRR11074676	USA	IA	2015	O149:H10	A	ST100	No FimH	NA
SRR11074677	USA	MO	2015	O149:H10	A	ST100	No FimH	NA
SRR11074679	USA	MN	2015	O149:H10	A	ST100	No FimH	NA
SRR11074680	USA	MO	2015	O149:H10	A	ST100	No FimH	NA
SRR11074681	USA	TX	2014	O149:H10	A	ST100	No FimH	NA
SRR11074684	USA	KS	2015	O149:H10	A	ST100	No FimH	NA
SRR11074686	USA	MN	2015	O149:H10	A	ST100	No FimH	NA
SRR11074688	USA	KS	2015	O149:H10	A	ST100	No FimH	NA
SRR11074697	USA	MN	2015	O149:H10	A	ST100	No FimH	NA
SRR11074704	USA	KS	2015	O149:H10	A	ST100	No FimH	NA
SRR11074708	USA	IA	2015	O149:H10	A	ST100	No FimH	NA
SRR11074710	USA	IA	2015	O149:H10	A	ST100	No FimH	NA
SRR11074716	USA	OK	2015	O149:H10	A	ST100	No FimH	NA
SRR6121969	USA	IN	2017	O149:H10	A	ST100	No FimH	NA
SRR7213569	USA	MN	2014	O149:H10	A	ST100	No FimH	NA
SRR7213570	USA	IA	2014	O149:H10	A	ST100	No FimH	NA
SRR7213571	USA	NE	2014	O149:H10	A	ST100	No FimH	NA
SRR7213572	USA	NC	2014	O149:H10	A	ST100	No FimH	NA
SRR7213573	USA	VA	2014	O149:H10	A	ST100	No FimH	NA
SRR7213575	USA	IL	2014	O149:H10	A	ST100	No FimH	NA
SRR7213576	USA	IA	2014	O149:H10	A	ST100	No FimH	NA
SRR7213578	USA	IA	2014	O149:H10	A	ST100	No FimH	NA
SRR7213579	USA	IA	2014	O149:H10	A	ST100	No FimH	NA
SRR7213581	USA	IA	2014	O149:H10	A	ST100	No FimH	NA
SRR7213583	USA	IA	2014	O149:H10	A	ST100	No FimH	NA
SRR7213588	USA	IA	2014	O149:H10	A	ST100	No FimH	NA
SRR7213590	USA	IA	2014	O149:H10	A	ST100	No FimH	NA
SRR7213593	USA	IL	2014	O149:H10	A	ST100	No FimH	NA
SRR7213595	USA	MN	2014	O149:H10	A	ST100	No FimH	NA
SRR7213596	USA	IA	2014	O149:H10	A	ST100	No FimH	NA
SRR7213597	USA	MN	2014	O149:H10	A	ST100	No FimH	NA
SRR7213598	USA	IN	2014	O149:H10	A	ST100	No FimH	NA
SRR7213599	USA	IA	2014	O149:H10	A	ST100	No FimH	NA
SRR7213600	USA	IA	2014	O149:H10	A	ST100	No FimH	NA
SRR7213602	USA	IA	2014	O149:H10	A	ST100	No FimH	NA
SRR7213603	USA	IA	2014	O149:H10	A	ST100	No FimH	NA
SRR7213606	USA	IA	2014	O149:H10	A	ST100	No FimH	NA
SRR7213607	USA	IN	2014	O149:H10	A	ST100	No FimH	NA
SRR7213608	USA	IA	2014	O149:H10	A	ST100	No FimH	NA
SRR7213623	USA	IA	2014	O149:H10	A	ST100	No FimH	NA
SRR7213658	USA	SD	2014	O149:H10	A	ST100	No FimH	NA
SRR7213659	USA	IA	2014	O149:H10	A	ST100	No FimH	NA
SRR7213660	USA	IA	2014	O149:H10	A	ST100	No FimH	NA
SRR8157048	Switzerland	SW	2017	O149:H10	A	ST100	No FimH	NA
SRR8901382	USA	SD	2017	O149:H10	A	ST100	No FimH	NA
SRR8901386	USA	IA	2017	O149:H10	A	ST100	No FimH	NA
SRR8901388	USA	IA	2017	O149:H10	A	ST100	No FimH	NA
SRR8901392	USA	IA	2014	O149:H10	A	ST100	No FimH	NA
SRR8901396	USA	MN	2017	O149:H10	A	ST100	No FimH	NA
SRR8901397	USA	IA	2017	O149:H10	A	ST100	No FimH	NA
SRR8901398	USA	IA	2017	O149:H10	A	ST100	No FimH	NA
SRR8901402	USA	VA	2014	O149:H10	A	ST100	No FimH	NA
SRR8901404	USA	MO	2016	O149:H10	A	ST100	No FimH	NA
SRR8901430	USA	IA	2017	O149:H10	A	ST100	No FimH	NA
SRR8901439	USA	MO	2017	O149:H10	A	ST100	No FimH	NA
SRR8901452	USA	WI	2014	O149:H10	A	ST100	No FimH	NA
SRR9913963	USA	NC	2013	O149:H10	A	ST100	No FimH	NA
SRR9914120	USA	MN	2014	O149:H10	A	ST100	No FimH	NA
